# Supplementary material for: Cyclopentadienylironphosphacarboranes: fragility of polyhedral edges in the 11-vertex system
Source: Royal Society of Chemistry journal article supplement (doi:10.1039/c5ra17070b), 2015-12-09
Supplement: c5ra17070b1.pdf [file c5ra17070b1.pdf]

## Supporting Information

# Cyclopentadienylironphosphacarboranes: Fragility of Polyhedral Edges in the 11-Vertex System

Amr A. A. Attia,<sup>1</sup> Alexandru Lupan,\*<sup>1</sup> and R. Bruce King\*<sup>2</sup>

<sup>1</sup> *Department of Chemistry, Faculty of Chemistry and Chemical Engineering, Babes, -Bolyai University, Cluj-Napoca, Romania*

<sup>2</sup> *Department of Chemistry and Center for Computational Quantum Chemistry, University of Georgia, Athens, Georgia, 30602, USA*

Table S1A. Initial CpFeCHPHB<sub>5</sub>H<sub>5</sub> structures.

Table S1B. Distance table for the lowest-lying CpFeCHPCH<sub>3</sub>B<sub>5</sub>H<sub>5</sub> structures.

Table S1C. Energy ranking for all the CpFeCHPHB<sub>5</sub>H<sub>5</sub> structures.

Table S2A. Initial CpFeCHPHB<sub>6</sub>H<sub>6</sub> structures.

Table S2B. Distance table for the lowest-lying CpFeCHPCH<sub>3</sub>B<sub>6</sub>H<sub>6</sub> structures.

Table S2C. Energy ranking for all the CpFeCHPHB<sub>6</sub>H<sub>6</sub> structures.

Table S3A. Initial CpFeCHPHB<sub>7</sub>H<sub>7</sub> structures.

Table S3B. Distances table for the lowest-lying CpFeCHPCH<sub>3</sub>B<sub>7</sub>H<sub>7</sub> structures.

Table S3C. Energy ranking for all the CpFeCHPCH<sub>3</sub>B<sub>7</sub>H<sub>7</sub> structures.

Table S4A. Initial CpFeCHPHB<sub>8</sub>H<sub>8</sub> structures.

Table S4B. Distance table for the lowest-lying CpFeCHPCH<sub>3</sub>B<sub>8</sub>H<sub>8</sub> structures.

Table S4C. Energy ranking for all the CpFeCHPHB<sub>8</sub>H<sub>8</sub> structures.

Table S5A. Initial CpFeCHPHB<sub>9</sub>H<sub>9</sub> structures.

Table S5B. Distance table for the lowest-lying CpFeCHPCH<sub>3</sub>B<sub>9</sub>H<sub>9</sub> structures.

Table S5C. Energy ranking for all the CpFeCHPHB<sub>9</sub>H<sub>9</sub> structures.

Complete Gaussian09 Reference (reference

22) Gaussian 09, Revision A.02,

M. J. Frisch, G. W. Trucks, H. B. Schlegel, G. E. Scuseria, M. A. Robb, J. R. Cheeseman, G. Scalmani,

V. Barone, B. Mennucci, G. A. Petersson, H. Nakatsuji, M. Caricato, X. Li, H. P. Hratchian, A. F. Izmaylov, J. Bloino, G. Zheng, J. L. Sonnenberg, M. Hada, M. Ehara, K. Toyota, R. Fukuda, J. Hasegawa, M. Ishida, T. Nakajima, Y. Honda, O. Kitao, H. Nakai, T. Vreven, J. A. Montgomery, Jr., J.

E. Peralta, F. Ogliaro, M. Bearpark, J. J. Heyd, E. Brothers, K. N. Kudin, V. N. Staroverov, R. Kobayashi, J. Normand, K. Raghavachari, A. Rendell, J. C. Burant, S. S. Iyengar, J. Tomasi, M. Cossi,

N. Rega, J. M. Millam, M. Klene, J. E. Knox, J. B. Cross, V. Bakken, C. Adamo, J. Jaramillo, R. Gomperts, R. E. Stratmann, O. Yazyev, A. J. Austin, R. Cammi, C. Pomelli, J. W. Ochterski, R. L. Martin, K. Morokuma, V. G. Zakrzewski, G. A. Voth, P. Salvador, J. J. Dannenberg, S. Dapprich, A. D. Daniels, O. Farkas, J. B. Foresman, J. V. Ortiz, J. Cioslowski, and D. J. Fox, Gaussian, Inc., Wallingford CT, 2009.

Table S1A. Initial CpFeCHPHB<sub>5</sub>H<sub>5</sub> structures, 593 in all.

|                                                                                                                   |                                                                                                                                           |                                                                                                                                            |
|-------------------------------------------------------------------------------------------------------------------|-------------------------------------------------------------------------------------------------------------------------------------------|--------------------------------------------------------------------------------------------------------------------------------------------|
| <p>Initial structures</p>                                                                                         | 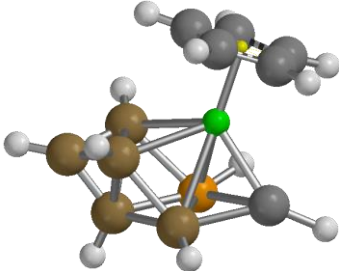 <p>Trigonal Antiprism 26</p>                            |  <p>Antiprism 22</p>                                    |
|  <p>Hexagonal bipyramid 34</p>  |  <p>Bisdisphenoid 52</p>                                |  <p>Cube 14</p>                                        |
|  <p>Bicapped octahedron 74</p> |  <p>Bicapped trigonal prism C<sub>2v</sub><br/>110</p> |  <p>Bicapped trigonal prism C<sub>s</sub><br/>115</p> |
|  <p>Nido 64</p>                |  <p>Trigonal prism 28</p>                              |  <p>Tetracapped tetrahedron 54</p>                    |

Table S1B. Distance table for the lowest-lying CpFeCHPCH<sub>3</sub>B<sub>5</sub>H<sub>5</sub> structures after M06L/6-311G(d,p) optimization. Included are the ZPcorrected E (a.u.), relative energy (kcal/mol), HOMO/LUMO gaps (eV) and symmetry.

| 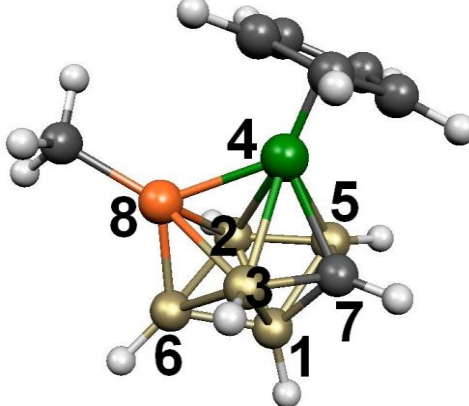 <p>1. -2004.2092626 0.0<br/>C<sub>1</sub> H/L 2.39</p>    | <table border="1"> <thead> <tr> <th></th> <th>1</th> <th>2</th> <th>3</th> <th>4</th> <th>5</th> </tr> </thead> <tbody> <tr><td>1 B</td><td>0.000000</td><td></td><td></td><td></td><td></td></tr> <tr><td>2 B</td><td>1.852901</td><td>0.000000</td><td></td><td></td><td></td></tr> <tr><td>3 B</td><td>1.827009</td><td>2.596586</td><td>0.000000</td><td></td><td></td></tr> <tr><td>4 Fe</td><td>2.882392</td><td>2.289299</td><td>2.217385</td><td>0.000000</td><td></td></tr> <tr><td>5 B</td><td>1.789983</td><td>1.699279</td><td>2.613492</td><td>2.058878</td><td>0.000000</td></tr> <tr><td>6 B</td><td>1.699546</td><td>1.916098</td><td>1.877178</td><td>3.112391</td><td>2.959930</td></tr> <tr><td>7 C</td><td>1.657209</td><td>2.542382</td><td>1.565161</td><td>2.014429</td><td>1.539599</td></tr> <tr><td>8 P</td><td>2.804536</td><td>1.989259</td><td>2.099293</td><td>2.094771</td><td>3.078882</td></tr> <tr> <td></td> <td>6</td> <td>7</td> <td>8</td> <td></td> <td></td> </tr> <tr><td>6 B</td><td>0.000000</td><td></td><td></td><td></td><td></td></tr> <tr><td>7 C</td><td>2.804017</td><td>0.000000</td><td></td><td></td><td></td></tr> <tr><td>8 P</td><td>1.803674</td><td>3.020840</td><td>0.000000</td><td></td><td></td></tr> </tbody> </table>  |          | 1        | 2        | 3        | 4 | 5 | 1 B | 0.000000 |  |  |  |  | 2 B | 1.852901 | 0.000000 |  |  |  | 3 B  | 1.827009 | 2.596586 | 0.000000 |  |  | 4 Fe | 2.882392 | 2.289299 | 2.217385 | 0.000000 |  | 5 B | 1.789983 | 1.699279 | 2.613492 | 2.058878 | 0.000000 | 6 B | 1.699546 | 1.916098 | 1.877178 | 3.112391 | 2.959930 | 7 C | 1.657209 | 2.542382 | 1.565161 | 2.014429 | 1.539599 | 8 P  | 2.804536 | 1.989259 | 2.099293 | 2.094771 | 3.078882 |  | 6 | 7 | 8 |  |  | 6 B | 0.000000 |  |  |  |  | 7 C | 2.804017 | 0.000000 |  |  |  | 8 P  | 1.803674 | 3.020840 | 0.000000 |  |  |
|---------------------------------------------------------------------------------------------------------------------------------------------|----------------------------------------------------------------------------------------------------------------------------------------------------------------------------------------------------------------------------------------------------------------------------------------------------------------------------------------------------------------------------------------------------------------------------------------------------------------------------------------------------------------------------------------------------------------------------------------------------------------------------------------------------------------------------------------------------------------------------------------------------------------------------------------------------------------------------------------------------------------------------------------------------------------------------------------------------------------------------------------------------------------------------------------------------------------------------------------------------------------------------------------------------------------------------------------------------------------------------------------------------------------------------------------|----------|----------|----------|----------|---|---|-----|----------|--|--|--|--|-----|----------|----------|--|--|--|------|----------|----------|----------|--|--|------|----------|----------|----------|----------|--|-----|----------|----------|----------|----------|----------|-----|----------|----------|----------|----------|----------|-----|----------|----------|----------|----------|----------|------|----------|----------|----------|----------|----------|--|---|---|---|--|--|-----|----------|--|--|--|--|-----|----------|----------|--|--|--|------|----------|----------|----------|--|--|
|                                                                                                                                             | 1                                                                                                                                                                                                                                                                                                                                                                                                                                                                                                                                                                                                                                                                                                                                                                                                                                                                                                                                                                                                                                                                                                                                                                                                                                                                                      | 2        | 3        | 4        | 5        |   |   |     |          |  |  |  |  |     |          |          |  |  |  |      |          |          |          |  |  |      |          |          |          |          |  |     |          |          |          |          |          |     |          |          |          |          |          |     |          |          |          |          |          |      |          |          |          |          |          |  |   |   |   |  |  |     |          |  |  |  |  |     |          |          |  |  |  |      |          |          |          |  |  |
| 1 B                                                                                                                                         | 0.000000                                                                                                                                                                                                                                                                                                                                                                                                                                                                                                                                                                                                                                                                                                                                                                                                                                                                                                                                                                                                                                                                                                                                                                                                                                                                               |          |          |          |          |   |   |     |          |  |  |  |  |     |          |          |  |  |  |      |          |          |          |  |  |      |          |          |          |          |  |     |          |          |          |          |          |     |          |          |          |          |          |     |          |          |          |          |          |      |          |          |          |          |          |  |   |   |   |  |  |     |          |  |  |  |  |     |          |          |  |  |  |      |          |          |          |  |  |
| 2 B                                                                                                                                         | 1.852901                                                                                                                                                                                                                                                                                                                                                                                                                                                                                                                                                                                                                                                                                                                                                                                                                                                                                                                                                                                                                                                                                                                                                                                                                                                                               | 0.000000 |          |          |          |   |   |     |          |  |  |  |  |     |          |          |  |  |  |      |          |          |          |  |  |      |          |          |          |          |  |     |          |          |          |          |          |     |          |          |          |          |          |     |          |          |          |          |          |      |          |          |          |          |          |  |   |   |   |  |  |     |          |  |  |  |  |     |          |          |  |  |  |      |          |          |          |  |  |
| 3 B                                                                                                                                         | 1.827009                                                                                                                                                                                                                                                                                                                                                                                                                                                                                                                                                                                                                                                                                                                                                                                                                                                                                                                                                                                                                                                                                                                                                                                                                                                                               | 2.596586 | 0.000000 |          |          |   |   |     |          |  |  |  |  |     |          |          |  |  |  |      |          |          |          |  |  |      |          |          |          |          |  |     |          |          |          |          |          |     |          |          |          |          |          |     |          |          |          |          |          |      |          |          |          |          |          |  |   |   |   |  |  |     |          |  |  |  |  |     |          |          |  |  |  |      |          |          |          |  |  |
| 4 Fe                                                                                                                                        | 2.882392                                                                                                                                                                                                                                                                                                                                                                                                                                                                                                                                                                                                                                                                                                                                                                                                                                                                                                                                                                                                                                                                                                                                                                                                                                                                               | 2.289299 | 2.217385 | 0.000000 |          |   |   |     |          |  |  |  |  |     |          |          |  |  |  |      |          |          |          |  |  |      |          |          |          |          |  |     |          |          |          |          |          |     |          |          |          |          |          |     |          |          |          |          |          |      |          |          |          |          |          |  |   |   |   |  |  |     |          |  |  |  |  |     |          |          |  |  |  |      |          |          |          |  |  |
| 5 B                                                                                                                                         | 1.789983                                                                                                                                                                                                                                                                                                                                                                                                                                                                                                                                                                                                                                                                                                                                                                                                                                                                                                                                                                                                                                                                                                                                                                                                                                                                               | 1.699279 | 2.613492 | 2.058878 | 0.000000 |   |   |     |          |  |  |  |  |     |          |          |  |  |  |      |          |          |          |  |  |      |          |          |          |          |  |     |          |          |          |          |          |     |          |          |          |          |          |     |          |          |          |          |          |      |          |          |          |          |          |  |   |   |   |  |  |     |          |  |  |  |  |     |          |          |  |  |  |      |          |          |          |  |  |
| 6 B                                                                                                                                         | 1.699546                                                                                                                                                                                                                                                                                                                                                                                                                                                                                                                                                                                                                                                                                                                                                                                                                                                                                                                                                                                                                                                                                                                                                                                                                                                                               | 1.916098 | 1.877178 | 3.112391 | 2.959930 |   |   |     |          |  |  |  |  |     |          |          |  |  |  |      |          |          |          |  |  |      |          |          |          |          |  |     |          |          |          |          |          |     |          |          |          |          |          |     |          |          |          |          |          |      |          |          |          |          |          |  |   |   |   |  |  |     |          |  |  |  |  |     |          |          |  |  |  |      |          |          |          |  |  |
| 7 C                                                                                                                                         | 1.657209                                                                                                                                                                                                                                                                                                                                                                                                                                                                                                                                                                                                                                                                                                                                                                                                                                                                                                                                                                                                                                                                                                                                                                                                                                                                               | 2.542382 | 1.565161 | 2.014429 | 1.539599 |   |   |     |          |  |  |  |  |     |          |          |  |  |  |      |          |          |          |  |  |      |          |          |          |          |  |     |          |          |          |          |          |     |          |          |          |          |          |     |          |          |          |          |          |      |          |          |          |          |          |  |   |   |   |  |  |     |          |  |  |  |  |     |          |          |  |  |  |      |          |          |          |  |  |
| 8 P                                                                                                                                         | 2.804536                                                                                                                                                                                                                                                                                                                                                                                                                                                                                                                                                                                                                                                                                                                                                                                                                                                                                                                                                                                                                                                                                                                                                                                                                                                                               | 1.989259 | 2.099293 | 2.094771 | 3.078882 |   |   |     |          |  |  |  |  |     |          |          |  |  |  |      |          |          |          |  |  |      |          |          |          |          |  |     |          |          |          |          |          |     |          |          |          |          |          |     |          |          |          |          |          |      |          |          |          |          |          |  |   |   |   |  |  |     |          |  |  |  |  |     |          |          |  |  |  |      |          |          |          |  |  |
|                                                                                                                                             | 6                                                                                                                                                                                                                                                                                                                                                                                                                                                                                                                                                                                                                                                                                                                                                                                                                                                                                                                                                                                                                                                                                                                                                                                                                                                                                      | 7        | 8        |          |          |   |   |     |          |  |  |  |  |     |          |          |  |  |  |      |          |          |          |  |  |      |          |          |          |          |  |     |          |          |          |          |          |     |          |          |          |          |          |     |          |          |          |          |          |      |          |          |          |          |          |  |   |   |   |  |  |     |          |  |  |  |  |     |          |          |  |  |  |      |          |          |          |  |  |
| 6 B                                                                                                                                         | 0.000000                                                                                                                                                                                                                                                                                                                                                                                                                                                                                                                                                                                                                                                                                                                                                                                                                                                                                                                                                                                                                                                                                                                                                                                                                                                                               |          |          |          |          |   |   |     |          |  |  |  |  |     |          |          |  |  |  |      |          |          |          |  |  |      |          |          |          |          |  |     |          |          |          |          |          |     |          |          |          |          |          |     |          |          |          |          |          |      |          |          |          |          |          |  |   |   |   |  |  |     |          |  |  |  |  |     |          |          |  |  |  |      |          |          |          |  |  |
| 7 C                                                                                                                                         | 2.804017                                                                                                                                                                                                                                                                                                                                                                                                                                                                                                                                                                                                                                                                                                                                                                                                                                                                                                                                                                                                                                                                                                                                                                                                                                                                               | 0.000000 |          |          |          |   |   |     |          |  |  |  |  |     |          |          |  |  |  |      |          |          |          |  |  |      |          |          |          |          |  |     |          |          |          |          |          |     |          |          |          |          |          |     |          |          |          |          |          |      |          |          |          |          |          |  |   |   |   |  |  |     |          |  |  |  |  |     |          |          |  |  |  |      |          |          |          |  |  |
| 8 P                                                                                                                                         | 1.803674                                                                                                                                                                                                                                                                                                                                                                                                                                                                                                                                                                                                                                                                                                                                                                                                                                                                                                                                                                                                                                                                                                                                                                                                                                                                               | 3.020840 | 0.000000 |          |          |   |   |     |          |  |  |  |  |     |          |          |  |  |  |      |          |          |          |  |  |      |          |          |          |          |  |     |          |          |          |          |          |     |          |          |          |          |          |     |          |          |          |          |          |      |          |          |          |          |          |  |   |   |   |  |  |     |          |  |  |  |  |     |          |          |  |  |  |      |          |          |          |  |  |
|  <p>2. -2004.2092216 +0.03<br/>C<sub>1</sub> H/L 2.45</p> | <table border="1"> <thead> <tr> <th></th> <th>1</th> <th>2</th> <th>3</th> <th>4</th> <th>5</th> </tr> </thead> <tbody> <tr><td>1 P</td><td>0.000000</td><td></td><td></td><td></td><td></td></tr> <tr><td>2 C</td><td>2.615800</td><td>0.000000</td><td></td><td></td><td></td></tr> <tr><td>3 B</td><td>1.979133</td><td>2.872891</td><td>0.000000</td><td></td><td></td></tr> <tr><td>4 B</td><td>2.584146</td><td>1.610125</td><td>1.774933</td><td>0.000000</td><td></td></tr> <tr><td>5 B</td><td>2.133551</td><td>1.636322</td><td>2.757292</td><td>1.829950</td><td>0.000000</td></tr> <tr><td>6 B</td><td>1.964582</td><td>2.769470</td><td>1.671133</td><td>1.791352</td><td>1.735271</td></tr> <tr><td>7 B</td><td>1.888341</td><td>1.528609</td><td>3.138866</td><td>2.666408</td><td>1.928791</td></tr> <tr><td>8 Fe</td><td>2.222265</td><td>1.999264</td><td>2.045098</td><td>2.138199</td><td>2.931459</td></tr> <tr> <td></td> <td>6</td> <td>7</td> <td>8</td> <td></td> <td></td> </tr> <tr><td>6 B</td><td>0.000000</td><td></td><td></td><td></td><td></td></tr> <tr><td>7 B</td><td>3.034870</td><td>0.000000</td><td></td><td></td><td></td></tr> <tr><td>8 Fe</td><td>3.053345</td><td>2.097365</td><td>0.000000</td><td></td><td></td></tr> </tbody> </table> |          | 1        | 2        | 3        | 4 | 5 | 1 P | 0.000000 |  |  |  |  | 2 C | 2.615800 | 0.000000 |  |  |  | 3 B  | 1.979133 | 2.872891 | 0.000000 |  |  | 4 B  | 2.584146 | 1.610125 | 1.774933 | 0.000000 |  | 5 B | 2.133551 | 1.636322 | 2.757292 | 1.829950 | 0.000000 | 6 B | 1.964582 | 2.769470 | 1.671133 | 1.791352 | 1.735271 | 7 B | 1.888341 | 1.528609 | 3.138866 | 2.666408 | 1.928791 | 8 Fe | 2.222265 | 1.999264 | 2.045098 | 2.138199 | 2.931459 |  | 6 | 7 | 8 |  |  | 6 B | 0.000000 |  |  |  |  | 7 B | 3.034870 | 0.000000 |  |  |  | 8 Fe | 3.053345 | 2.097365 | 0.000000 |  |  |
|                                                                                                                                             | 1                                                                                                                                                                                                                                                                                                                                                                                                                                                                                                                                                                                                                                                                                                                                                                                                                                                                                                                                                                                                                                                                                                                                                                                                                                                                                      | 2        | 3        | 4        | 5        |   |   |     |          |  |  |  |  |     |          |          |  |  |  |      |          |          |          |  |  |      |          |          |          |          |  |     |          |          |          |          |          |     |          |          |          |          |          |     |          |          |          |          |          |      |          |          |          |          |          |  |   |   |   |  |  |     |          |  |  |  |  |     |          |          |  |  |  |      |          |          |          |  |  |
| 1 P                                                                                                                                         | 0.000000                                                                                                                                                                                                                                                                                                                                                                                                                                                                                                                                                                                                                                                                                                                                                                                                                                                                                                                                                                                                                                                                                                                                                                                                                                                                               |          |          |          |          |   |   |     |          |  |  |  |  |     |          |          |  |  |  |      |          |          |          |  |  |      |          |          |          |          |  |     |          |          |          |          |          |     |          |          |          |          |          |     |          |          |          |          |          |      |          |          |          |          |          |  |   |   |   |  |  |     |          |  |  |  |  |     |          |          |  |  |  |      |          |          |          |  |  |
| 2 C                                                                                                                                         | 2.615800                                                                                                                                                                                                                                                                                                                                                                                                                                                                                                                                                                                                                                                                                                                                                                                                                                                                                                                                                                                                                                                                                                                                                                                                                                                                               | 0.000000 |          |          |          |   |   |     |          |  |  |  |  |     |          |          |  |  |  |      |          |          |          |  |  |      |          |          |          |          |  |     |          |          |          |          |          |     |          |          |          |          |          |     |          |          |          |          |          |      |          |          |          |          |          |  |   |   |   |  |  |     |          |  |  |  |  |     |          |          |  |  |  |      |          |          |          |  |  |
| 3 B                                                                                                                                         | 1.979133                                                                                                                                                                                                                                                                                                                                                                                                                                                                                                                                                                                                                                                                                                                                                                                                                                                                                                                                                                                                                                                                                                                                                                                                                                                                               | 2.872891 | 0.000000 |          |          |   |   |     |          |  |  |  |  |     |          |          |  |  |  |      |          |          |          |  |  |      |          |          |          |          |  |     |          |          |          |          |          |     |          |          |          |          |          |     |          |          |          |          |          |      |          |          |          |          |          |  |   |   |   |  |  |     |          |  |  |  |  |     |          |          |  |  |  |      |          |          |          |  |  |
| 4 B                                                                                                                                         | 2.584146                                                                                                                                                                                                                                                                                                                                                                                                                                                                                                                                                                                                                                                                                                                                                                                                                                                                                                                                                                                                                                                                                                                                                                                                                                                                               | 1.610125 | 1.774933 | 0.000000 |          |   |   |     |          |  |  |  |  |     |          |          |  |  |  |      |          |          |          |  |  |      |          |          |          |          |  |     |          |          |          |          |          |     |          |          |          |          |          |     |          |          |          |          |          |      |          |          |          |          |          |  |   |   |   |  |  |     |          |  |  |  |  |     |          |          |  |  |  |      |          |          |          |  |  |
| 5 B                                                                                                                                         | 2.133551                                                                                                                                                                                                                                                                                                                                                                                                                                                                                                                                                                                                                                                                                                                                                                                                                                                                                                                                                                                                                                                                                                                                                                                                                                                                               | 1.636322 | 2.757292 | 1.829950 | 0.000000 |   |   |     |          |  |  |  |  |     |          |          |  |  |  |      |          |          |          |  |  |      |          |          |          |          |  |     |          |          |          |          |          |     |          |          |          |          |          |     |          |          |          |          |          |      |          |          |          |          |          |  |   |   |   |  |  |     |          |  |  |  |  |     |          |          |  |  |  |      |          |          |          |  |  |
| 6 B                                                                                                                                         | 1.964582                                                                                                                                                                                                                                                                                                                                                                                                                                                                                                                                                                                                                                                                                                                                                                                                                                                                                                                                                                                                                                                                                                                                                                                                                                                                               | 2.769470 | 1.671133 | 1.791352 | 1.735271 |   |   |     |          |  |  |  |  |     |          |          |  |  |  |      |          |          |          |  |  |      |          |          |          |          |  |     |          |          |          |          |          |     |          |          |          |          |          |     |          |          |          |          |          |      |          |          |          |          |          |  |   |   |   |  |  |     |          |  |  |  |  |     |          |          |  |  |  |      |          |          |          |  |  |
| 7 B                                                                                                                                         | 1.888341                                                                                                                                                                                                                                                                                                                                                                                                                                                                                                                                                                                                                                                                                                                                                                                                                                                                                                                                                                                                                                                                                                                                                                                                                                                                               | 1.528609 | 3.138866 | 2.666408 | 1.928791 |   |   |     |          |  |  |  |  |     |          |          |  |  |  |      |          |          |          |  |  |      |          |          |          |          |  |     |          |          |          |          |          |     |          |          |          |          |          |     |          |          |          |          |          |      |          |          |          |          |          |  |   |   |   |  |  |     |          |  |  |  |  |     |          |          |  |  |  |      |          |          |          |  |  |
| 8 Fe                                                                                                                                        | 2.222265                                                                                                                                                                                                                                                                                                                                                                                                                                                                                                                                                                                                                                                                                                                                                                                                                                                                                                                                                                                                                                                                                                                                                                                                                                                                               | 1.999264 | 2.045098 | 2.138199 | 2.931459 |   |   |     |          |  |  |  |  |     |          |          |  |  |  |      |          |          |          |  |  |      |          |          |          |          |  |     |          |          |          |          |          |     |          |          |          |          |          |     |          |          |          |          |          |      |          |          |          |          |          |  |   |   |   |  |  |     |          |  |  |  |  |     |          |          |  |  |  |      |          |          |          |  |  |
|                                                                                                                                             | 6                                                                                                                                                                                                                                                                                                                                                                                                                                                                                                                                                                                                                                                                                                                                                                                                                                                                                                                                                                                                                                                                                                                                                                                                                                                                                      | 7        | 8        |          |          |   |   |     |          |  |  |  |  |     |          |          |  |  |  |      |          |          |          |  |  |      |          |          |          |          |  |     |          |          |          |          |          |     |          |          |          |          |          |     |          |          |          |          |          |      |          |          |          |          |          |  |   |   |   |  |  |     |          |  |  |  |  |     |          |          |  |  |  |      |          |          |          |  |  |
| 6 B                                                                                                                                         | 0.000000                                                                                                                                                                                                                                                                                                                                                                                                                                                                                                                                                                                                                                                                                                                                                                                                                                                                                                                                                                                                                                                                                                                                                                                                                                                                               |          |          |          |          |   |   |     |          |  |  |  |  |     |          |          |  |  |  |      |          |          |          |  |  |      |          |          |          |          |  |     |          |          |          |          |          |     |          |          |          |          |          |     |          |          |          |          |          |      |          |          |          |          |          |  |   |   |   |  |  |     |          |  |  |  |  |     |          |          |  |  |  |      |          |          |          |  |  |
| 7 B                                                                                                                                         | 3.034870                                                                                                                                                                                                                                                                                                                                                                                                                                                                                                                                                                                                                                                                                                                                                                                                                                                                                                                                                                                                                                                                                                                                                                                                                                                                               | 0.000000 |          |          |          |   |   |     |          |  |  |  |  |     |          |          |  |  |  |      |          |          |          |  |  |      |          |          |          |          |  |     |          |          |          |          |          |     |          |          |          |          |          |     |          |          |          |          |          |      |          |          |          |          |          |  |   |   |   |  |  |     |          |  |  |  |  |     |          |          |  |  |  |      |          |          |          |  |  |
| 8 Fe                                                                                                                                        | 3.053345                                                                                                                                                                                                                                                                                                                                                                                                                                                                                                                                                                                                                                                                                                                                                                                                                                                                                                                                                                                                                                                                                                                                                                                                                                                                               | 2.097365 | 0.000000 |          |          |   |   |     |          |  |  |  |  |     |          |          |  |  |  |      |          |          |          |  |  |      |          |          |          |          |  |     |          |          |          |          |          |     |          |          |          |          |          |     |          |          |          |          |          |      |          |          |          |          |          |  |   |   |   |  |  |     |          |  |  |  |  |     |          |          |  |  |  |      |          |          |          |  |  |
|  <p>3. -2004.2090771 +0.12</p>                           | <table border="1"> <thead> <tr> <th></th> <th>1</th> <th>2</th> <th>3</th> <th>4</th> <th>5</th> </tr> </thead> <tbody> <tr><td>1 P</td><td>0.000000</td><td></td><td></td><td></td><td></td></tr> <tr><td>2 B</td><td>2.026207</td><td>0.000000</td><td></td><td></td><td></td></tr> <tr><td>3 Fe</td><td>2.165183</td><td>2.948237</td><td>0.000000</td><td></td><td></td></tr> <tr><td>4 B</td><td>1.934080</td><td>1.973475</td><td>2.208087</td><td>0.000000</td><td></td></tr> <tr><td>5 B</td><td>1.827084</td><td>1.845552</td><td>2.179937</td><td>2.800248</td><td>0.000000</td></tr> <tr><td>6 B</td><td>3.106311</td><td>2.664014</td><td>1.968059</td><td>1.761191</td><td>3.012823</td></tr> <tr><td>7 C</td><td>2.935269</td><td>1.578761</td><td>2.876109</td><td>1.653872</td><td>2.803758</td></tr> <tr><td>8 B</td><td>2.781587</td><td>1.826683</td><td>2.176839</td><td>2.461117</td><td>1.704479</td></tr> <tr> <td></td> <td>6</td> <td>7</td> <td>8</td> <td></td> <td></td> </tr> <tr><td>6 B</td><td>0.000000</td><td></td><td></td><td></td><td></td></tr> <tr><td>7 C</td><td>1.545781</td><td>0.000000</td><td></td><td></td><td></td></tr> <tr><td>8 B</td><td>1.795568</td><td>1.673490</td><td>0.000000</td><td></td><td></td></tr> </tbody> </table>  |          | 1        | 2        | 3        | 4 | 5 | 1 P | 0.000000 |  |  |  |  | 2 B | 2.026207 | 0.000000 |  |  |  | 3 Fe | 2.165183 | 2.948237 | 0.000000 |  |  | 4 B  | 1.934080 | 1.973475 | 2.208087 | 0.000000 |  | 5 B | 1.827084 | 1.845552 | 2.179937 | 2.800248 | 0.000000 | 6 B | 3.106311 | 2.664014 | 1.968059 | 1.761191 | 3.012823 | 7 C | 2.935269 | 1.578761 | 2.876109 | 1.653872 | 2.803758 | 8 B  | 2.781587 | 1.826683 | 2.176839 | 2.461117 | 1.704479 |  | 6 | 7 | 8 |  |  | 6 B | 0.000000 |  |  |  |  | 7 C | 1.545781 | 0.000000 |  |  |  | 8 B  | 1.795568 | 1.673490 | 0.000000 |  |  |
|                                                                                                                                             | 1                                                                                                                                                                                                                                                                                                                                                                                                                                                                                                                                                                                                                                                                                                                                                                                                                                                                                                                                                                                                                                                                                                                                                                                                                                                                                      | 2        | 3        | 4        | 5        |   |   |     |          |  |  |  |  |     |          |          |  |  |  |      |          |          |          |  |  |      |          |          |          |          |  |     |          |          |          |          |          |     |          |          |          |          |          |     |          |          |          |          |          |      |          |          |          |          |          |  |   |   |   |  |  |     |          |  |  |  |  |     |          |          |  |  |  |      |          |          |          |  |  |
| 1 P                                                                                                                                         | 0.000000                                                                                                                                                                                                                                                                                                                                                                                                                                                                                                                                                                                                                                                                                                                                                                                                                                                                                                                                                                                                                                                                                                                                                                                                                                                                               |          |          |          |          |   |   |     |          |  |  |  |  |     |          |          |  |  |  |      |          |          |          |  |  |      |          |          |          |          |  |     |          |          |          |          |          |     |          |          |          |          |          |     |          |          |          |          |          |      |          |          |          |          |          |  |   |   |   |  |  |     |          |  |  |  |  |     |          |          |  |  |  |      |          |          |          |  |  |
| 2 B                                                                                                                                         | 2.026207                                                                                                                                                                                                                                                                                                                                                                                                                                                                                                                                                                                                                                                                                                                                                                                                                                                                                                                                                                                                                                                                                                                                                                                                                                                                               | 0.000000 |          |          |          |   |   |     |          |  |  |  |  |     |          |          |  |  |  |      |          |          |          |  |  |      |          |          |          |          |  |     |          |          |          |          |          |     |          |          |          |          |          |     |          |          |          |          |          |      |          |          |          |          |          |  |   |   |   |  |  |     |          |  |  |  |  |     |          |          |  |  |  |      |          |          |          |  |  |
| 3 Fe                                                                                                                                        | 2.165183                                                                                                                                                                                                                                                                                                                                                                                                                                                                                                                                                                                                                                                                                                                                                                                                                                                                                                                                                                                                                                                                                                                                                                                                                                                                               | 2.948237 | 0.000000 |          |          |   |   |     |          |  |  |  |  |     |          |          |  |  |  |      |          |          |          |  |  |      |          |          |          |          |  |     |          |          |          |          |          |     |          |          |          |          |          |     |          |          |          |          |          |      |          |          |          |          |          |  |   |   |   |  |  |     |          |  |  |  |  |     |          |          |  |  |  |      |          |          |          |  |  |
| 4 B                                                                                                                                         | 1.934080                                                                                                                                                                                                                                                                                                                                                                                                                                                                                                                                                                                                                                                                                                                                                                                                                                                                                                                                                                                                                                                                                                                                                                                                                                                                               | 1.973475 | 2.208087 | 0.000000 |          |   |   |     |          |  |  |  |  |     |          |          |  |  |  |      |          |          |          |  |  |      |          |          |          |          |  |     |          |          |          |          |          |     |          |          |          |          |          |     |          |          |          |          |          |      |          |          |          |          |          |  |   |   |   |  |  |     |          |  |  |  |  |     |          |          |  |  |  |      |          |          |          |  |  |
| 5 B                                                                                                                                         | 1.827084                                                                                                                                                                                                                                                                                                                                                                                                                                                                                                                                                                                                                                                                                                                                                                                                                                                                                                                                                                                                                                                                                                                                                                                                                                                                               | 1.845552 | 2.179937 | 2.800248 | 0.000000 |   |   |     |          |  |  |  |  |     |          |          |  |  |  |      |          |          |          |  |  |      |          |          |          |          |  |     |          |          |          |          |          |     |          |          |          |          |          |     |          |          |          |          |          |      |          |          |          |          |          |  |   |   |   |  |  |     |          |  |  |  |  |     |          |          |  |  |  |      |          |          |          |  |  |
| 6 B                                                                                                                                         | 3.106311                                                                                                                                                                                                                                                                                                                                                                                                                                                                                                                                                                                                                                                                                                                                                                                                                                                                                                                                                                                                                                                                                                                                                                                                                                                                               | 2.664014 | 1.968059 | 1.761191 | 3.012823 |   |   |     |          |  |  |  |  |     |          |          |  |  |  |      |          |          |          |  |  |      |          |          |          |          |  |     |          |          |          |          |          |     |          |          |          |          |          |     |          |          |          |          |          |      |          |          |          |          |          |  |   |   |   |  |  |     |          |  |  |  |  |     |          |          |  |  |  |      |          |          |          |  |  |
| 7 C                                                                                                                                         | 2.935269                                                                                                                                                                                                                                                                                                                                                                                                                                                                                                                                                                                                                                                                                                                                                                                                                                                                                                                                                                                                                                                                                                                                                                                                                                                                               | 1.578761 | 2.876109 | 1.653872 | 2.803758 |   |   |     |          |  |  |  |  |     |          |          |  |  |  |      |          |          |          |  |  |      |          |          |          |          |  |     |          |          |          |          |          |     |          |          |          |          |          |     |          |          |          |          |          |      |          |          |          |          |          |  |   |   |   |  |  |     |          |  |  |  |  |     |          |          |  |  |  |      |          |          |          |  |  |
| 8 B                                                                                                                                         | 2.781587                                                                                                                                                                                                                                                                                                                                                                                                                                                                                                                                                                                                                                                                                                                                                                                                                                                                                                                                                                                                                                                                                                                                                                                                                                                                               | 1.826683 | 2.176839 | 2.461117 | 1.704479 |   |   |     |          |  |  |  |  |     |          |          |  |  |  |      |          |          |          |  |  |      |          |          |          |          |  |     |          |          |          |          |          |     |          |          |          |          |          |     |          |          |          |          |          |      |          |          |          |          |          |  |   |   |   |  |  |     |          |  |  |  |  |     |          |          |  |  |  |      |          |          |          |  |  |
|                                                                                                                                             | 6                                                                                                                                                                                                                                                                                                                                                                                                                                                                                                                                                                                                                                                                                                                                                                                                                                                                                                                                                                                                                                                                                                                                                                                                                                                                                      | 7        | 8        |          |          |   |   |     |          |  |  |  |  |     |          |          |  |  |  |      |          |          |          |  |  |      |          |          |          |          |  |     |          |          |          |          |          |     |          |          |          |          |          |     |          |          |          |          |          |      |          |          |          |          |          |  |   |   |   |  |  |     |          |  |  |  |  |     |          |          |  |  |  |      |          |          |          |  |  |
| 6 B                                                                                                                                         | 0.000000                                                                                                                                                                                                                                                                                                                                                                                                                                                                                                                                                                                                                                                                                                                                                                                                                                                                                                                                                                                                                                                                                                                                                                                                                                                                               |          |          |          |          |   |   |     |          |  |  |  |  |     |          |          |  |  |  |      |          |          |          |  |  |      |          |          |          |          |  |     |          |          |          |          |          |     |          |          |          |          |          |     |          |          |          |          |          |      |          |          |          |          |          |  |   |   |   |  |  |     |          |  |  |  |  |     |          |          |  |  |  |      |          |          |          |  |  |
| 7 C                                                                                                                                         | 1.545781                                                                                                                                                                                                                                                                                                                                                                                                                                                                                                                                                                                                                                                                                                                                                                                                                                                                                                                                                                                                                                                                                                                                                                                                                                                                               | 0.000000 |          |          |          |   |   |     |          |  |  |  |  |     |          |          |  |  |  |      |          |          |          |  |  |      |          |          |          |          |  |     |          |          |          |          |          |     |          |          |          |          |          |     |          |          |          |          |          |      |          |          |          |          |          |  |   |   |   |  |  |     |          |  |  |  |  |     |          |          |  |  |  |      |          |          |          |  |  |
| 8 B                                                                                                                                         | 1.795568                                                                                                                                                                                                                                                                                                                                                                                                                                                                                                                                                                                                                                                                                                                                                                                                                                                                                                                                                                                                                                                                                                                                                                                                                                                                               | 1.673490 | 0.000000 |          |          |   |   |     |          |  |  |  |  |     |          |          |  |  |  |      |          |          |          |  |  |      |          |          |          |          |  |     |          |          |          |          |          |     |          |          |          |          |          |     |          |          |          |          |          |      |          |          |          |          |          |  |   |   |   |  |  |     |          |  |  |  |  |     |          |          |  |  |  |      |          |          |          |  |  |

| <p style="text-align: center;">C<sub>1</sub> H/L 2.65</p> 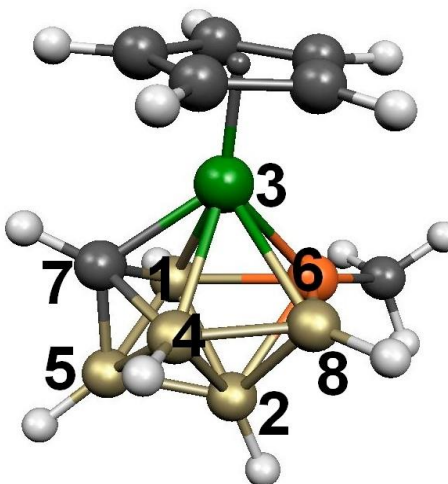 <p style="text-align: center;">4. -2004.2015460 +4.8<br/>C<sub>1</sub> H/L 2.40</p> | <table border="1"> <thead> <tr> <th></th> <th>1</th> <th>2</th> <th>3</th> <th>4</th> <th>5</th> </tr> </thead> <tbody> <tr><td>1 B</td><td>0.000000</td><td></td><td></td><td></td><td></td></tr> <tr><td>2 B</td><td>1.988456</td><td>0.000000</td><td></td><td></td><td></td></tr> <tr><td>3 Fe</td><td>2.198842</td><td>2.983595</td><td>0.000000</td><td></td><td></td></tr> <tr><td>4 B</td><td>2.437978</td><td>1.872105</td><td>2.162936</td><td>0.000000</td><td></td></tr> <tr><td>5 B</td><td>1.776724</td><td>1.671090</td><td>3.057091</td><td>1.791544</td><td>0.000000</td></tr> <tr><td>6 P</td><td>1.946479</td><td>2.013606</td><td>2.173673</td><td>2.763784</td><td>3.076664</td></tr> <tr><td>7 C</td><td>1.628841</td><td>2.523356</td><td>1.940202</td><td>1.659747</td><td>1.534575</td></tr> <tr><td>8 B</td><td>2.811364</td><td>1.891037</td><td>2.180134</td><td>1.712380</td><td>2.959419</td></tr> <tr> <td></td> <td>6</td> <td>7</td> <td>8</td> <td></td> <td></td> </tr> <tr><td>6 P</td><td>0.000000</td><td></td><td></td><td></td><td></td></tr> <tr><td>7 C</td><td>2.975674</td><td>0.000000</td><td></td><td></td><td></td></tr> <tr><td>8 B</td><td>1.820504</td><td>2.886201</td><td>0.000000</td><td></td><td></td></tr> </tbody> </table>  |          | 1        | 2        | 3        | 4 | 5 | 1 B | 0.000000 |  |  |  |  | 2 B | 1.988456 | 0.000000 |  |  |  | 3 Fe | 2.198842 | 2.983595 | 0.000000 |  |  | 4 B | 2.437978 | 1.872105 | 2.162936 | 0.000000 |  | 5 B  | 1.776724 | 1.671090 | 3.057091 | 1.791544 | 0.000000 | 6 P | 1.946479 | 2.013606 | 2.173673 | 2.763784 | 3.076664 | 7 C | 1.628841 | 2.523356 | 1.940202 | 1.659747 | 1.534575 | 8 B  | 2.811364 | 1.891037 | 2.180134 | 1.712380 | 2.959419 |  | 6 | 7 | 8 |  |  | 6 P | 0.000000 |  |  |  |  | 7 C | 2.975674 | 0.000000 |  |  |  | 8 B  | 1.820504 | 2.886201 | 0.000000 |  |  |
|---------------------------------------------------------------------------------------------------------------------------------------------------------------------------------------------------------------------------------|----------------------------------------------------------------------------------------------------------------------------------------------------------------------------------------------------------------------------------------------------------------------------------------------------------------------------------------------------------------------------------------------------------------------------------------------------------------------------------------------------------------------------------------------------------------------------------------------------------------------------------------------------------------------------------------------------------------------------------------------------------------------------------------------------------------------------------------------------------------------------------------------------------------------------------------------------------------------------------------------------------------------------------------------------------------------------------------------------------------------------------------------------------------------------------------------------------------------------------------------------------------------------------------|----------|----------|----------|----------|---|---|-----|----------|--|--|--|--|-----|----------|----------|--|--|--|------|----------|----------|----------|--|--|-----|----------|----------|----------|----------|--|------|----------|----------|----------|----------|----------|-----|----------|----------|----------|----------|----------|-----|----------|----------|----------|----------|----------|------|----------|----------|----------|----------|----------|--|---|---|---|--|--|-----|----------|--|--|--|--|-----|----------|----------|--|--|--|------|----------|----------|----------|--|--|
|                                                                                                                                                                                                                                 | 1                                                                                                                                                                                                                                                                                                                                                                                                                                                                                                                                                                                                                                                                                                                                                                                                                                                                                                                                                                                                                                                                                                                                                                                                                                                                                      | 2        | 3        | 4        | 5        |   |   |     |          |  |  |  |  |     |          |          |  |  |  |      |          |          |          |  |  |     |          |          |          |          |  |      |          |          |          |          |          |     |          |          |          |          |          |     |          |          |          |          |          |      |          |          |          |          |          |  |   |   |   |  |  |     |          |  |  |  |  |     |          |          |  |  |  |      |          |          |          |  |  |
| 1 B                                                                                                                                                                                                                             | 0.000000                                                                                                                                                                                                                                                                                                                                                                                                                                                                                                                                                                                                                                                                                                                                                                                                                                                                                                                                                                                                                                                                                                                                                                                                                                                                               |          |          |          |          |   |   |     |          |  |  |  |  |     |          |          |  |  |  |      |          |          |          |  |  |     |          |          |          |          |  |      |          |          |          |          |          |     |          |          |          |          |          |     |          |          |          |          |          |      |          |          |          |          |          |  |   |   |   |  |  |     |          |  |  |  |  |     |          |          |  |  |  |      |          |          |          |  |  |
| 2 B                                                                                                                                                                                                                             | 1.988456                                                                                                                                                                                                                                                                                                                                                                                                                                                                                                                                                                                                                                                                                                                                                                                                                                                                                                                                                                                                                                                                                                                                                                                                                                                                               | 0.000000 |          |          |          |   |   |     |          |  |  |  |  |     |          |          |  |  |  |      |          |          |          |  |  |     |          |          |          |          |  |      |          |          |          |          |          |     |          |          |          |          |          |     |          |          |          |          |          |      |          |          |          |          |          |  |   |   |   |  |  |     |          |  |  |  |  |     |          |          |  |  |  |      |          |          |          |  |  |
| 3 Fe                                                                                                                                                                                                                            | 2.198842                                                                                                                                                                                                                                                                                                                                                                                                                                                                                                                                                                                                                                                                                                                                                                                                                                                                                                                                                                                                                                                                                                                                                                                                                                                                               | 2.983595 | 0.000000 |          |          |   |   |     |          |  |  |  |  |     |          |          |  |  |  |      |          |          |          |  |  |     |          |          |          |          |  |      |          |          |          |          |          |     |          |          |          |          |          |     |          |          |          |          |          |      |          |          |          |          |          |  |   |   |   |  |  |     |          |  |  |  |  |     |          |          |  |  |  |      |          |          |          |  |  |
| 4 B                                                                                                                                                                                                                             | 2.437978                                                                                                                                                                                                                                                                                                                                                                                                                                                                                                                                                                                                                                                                                                                                                                                                                                                                                                                                                                                                                                                                                                                                                                                                                                                                               | 1.872105 | 2.162936 | 0.000000 |          |   |   |     |          |  |  |  |  |     |          |          |  |  |  |      |          |          |          |  |  |     |          |          |          |          |  |      |          |          |          |          |          |     |          |          |          |          |          |     |          |          |          |          |          |      |          |          |          |          |          |  |   |   |   |  |  |     |          |  |  |  |  |     |          |          |  |  |  |      |          |          |          |  |  |
| 5 B                                                                                                                                                                                                                             | 1.776724                                                                                                                                                                                                                                                                                                                                                                                                                                                                                                                                                                                                                                                                                                                                                                                                                                                                                                                                                                                                                                                                                                                                                                                                                                                                               | 1.671090 | 3.057091 | 1.791544 | 0.000000 |   |   |     |          |  |  |  |  |     |          |          |  |  |  |      |          |          |          |  |  |     |          |          |          |          |  |      |          |          |          |          |          |     |          |          |          |          |          |     |          |          |          |          |          |      |          |          |          |          |          |  |   |   |   |  |  |     |          |  |  |  |  |     |          |          |  |  |  |      |          |          |          |  |  |
| 6 P                                                                                                                                                                                                                             | 1.946479                                                                                                                                                                                                                                                                                                                                                                                                                                                                                                                                                                                                                                                                                                                                                                                                                                                                                                                                                                                                                                                                                                                                                                                                                                                                               | 2.013606 | 2.173673 | 2.763784 | 3.076664 |   |   |     |          |  |  |  |  |     |          |          |  |  |  |      |          |          |          |  |  |     |          |          |          |          |  |      |          |          |          |          |          |     |          |          |          |          |          |     |          |          |          |          |          |      |          |          |          |          |          |  |   |   |   |  |  |     |          |  |  |  |  |     |          |          |  |  |  |      |          |          |          |  |  |
| 7 C                                                                                                                                                                                                                             | 1.628841                                                                                                                                                                                                                                                                                                                                                                                                                                                                                                                                                                                                                                                                                                                                                                                                                                                                                                                                                                                                                                                                                                                                                                                                                                                                               | 2.523356 | 1.940202 | 1.659747 | 1.534575 |   |   |     |          |  |  |  |  |     |          |          |  |  |  |      |          |          |          |  |  |     |          |          |          |          |  |      |          |          |          |          |          |     |          |          |          |          |          |     |          |          |          |          |          |      |          |          |          |          |          |  |   |   |   |  |  |     |          |  |  |  |  |     |          |          |  |  |  |      |          |          |          |  |  |
| 8 B                                                                                                                                                                                                                             | 2.811364                                                                                                                                                                                                                                                                                                                                                                                                                                                                                                                                                                                                                                                                                                                                                                                                                                                                                                                                                                                                                                                                                                                                                                                                                                                                               | 1.891037 | 2.180134 | 1.712380 | 2.959419 |   |   |     |          |  |  |  |  |     |          |          |  |  |  |      |          |          |          |  |  |     |          |          |          |          |  |      |          |          |          |          |          |     |          |          |          |          |          |     |          |          |          |          |          |      |          |          |          |          |          |  |   |   |   |  |  |     |          |  |  |  |  |     |          |          |  |  |  |      |          |          |          |  |  |
|                                                                                                                                                                                                                                 | 6                                                                                                                                                                                                                                                                                                                                                                                                                                                                                                                                                                                                                                                                                                                                                                                                                                                                                                                                                                                                                                                                                                                                                                                                                                                                                      | 7        | 8        |          |          |   |   |     |          |  |  |  |  |     |          |          |  |  |  |      |          |          |          |  |  |     |          |          |          |          |  |      |          |          |          |          |          |     |          |          |          |          |          |     |          |          |          |          |          |      |          |          |          |          |          |  |   |   |   |  |  |     |          |  |  |  |  |     |          |          |  |  |  |      |          |          |          |  |  |
| 6 P                                                                                                                                                                                                                             | 0.000000                                                                                                                                                                                                                                                                                                                                                                                                                                                                                                                                                                                                                                                                                                                                                                                                                                                                                                                                                                                                                                                                                                                                                                                                                                                                               |          |          |          |          |   |   |     |          |  |  |  |  |     |          |          |  |  |  |      |          |          |          |  |  |     |          |          |          |          |  |      |          |          |          |          |          |     |          |          |          |          |          |     |          |          |          |          |          |      |          |          |          |          |          |  |   |   |   |  |  |     |          |  |  |  |  |     |          |          |  |  |  |      |          |          |          |  |  |
| 7 C                                                                                                                                                                                                                             | 2.975674                                                                                                                                                                                                                                                                                                                                                                                                                                                                                                                                                                                                                                                                                                                                                                                                                                                                                                                                                                                                                                                                                                                                                                                                                                                                               | 0.000000 |          |          |          |   |   |     |          |  |  |  |  |     |          |          |  |  |  |      |          |          |          |  |  |     |          |          |          |          |  |      |          |          |          |          |          |     |          |          |          |          |          |     |          |          |          |          |          |      |          |          |          |          |          |  |   |   |   |  |  |     |          |  |  |  |  |     |          |          |  |  |  |      |          |          |          |  |  |
| 8 B                                                                                                                                                                                                                             | 1.820504                                                                                                                                                                                                                                                                                                                                                                                                                                                                                                                                                                                                                                                                                                                                                                                                                                                                                                                                                                                                                                                                                                                                                                                                                                                                               | 2.886201 | 0.000000 |          |          |   |   |     |          |  |  |  |  |     |          |          |  |  |  |      |          |          |          |  |  |     |          |          |          |          |  |      |          |          |          |          |          |     |          |          |          |          |          |     |          |          |          |          |          |      |          |          |          |          |          |  |   |   |   |  |  |     |          |  |  |  |  |     |          |          |  |  |  |      |          |          |          |  |  |
|  <p style="text-align: center;">5. -2004.1921151 +10.8<br/>C<sub>1</sub> H/L 2.91</p>                                                         | <table border="1"> <thead> <tr> <th></th> <th>1</th> <th>2</th> <th>3</th> <th>4</th> <th>5</th> </tr> </thead> <tbody> <tr><td>1 P</td><td>0.000000</td><td></td><td></td><td></td><td></td></tr> <tr><td>2 B</td><td>2.024219</td><td>0.000000</td><td></td><td></td><td></td></tr> <tr><td>3 B</td><td>2.031966</td><td>2.609734</td><td>0.000000</td><td></td><td></td></tr> <tr><td>4 B</td><td>1.951155</td><td>1.892567</td><td>1.961285</td><td>0.000000</td><td></td></tr> <tr><td>5 B</td><td>1.855270</td><td>1.883879</td><td>2.154071</td><td>2.886456</td><td>0.000000</td></tr> <tr><td>6 C</td><td>2.951211</td><td>2.547886</td><td>1.574255</td><td>1.622899</td><td>3.048489</td></tr> <tr><td>7 B</td><td>3.122932</td><td>1.710283</td><td>2.633102</td><td>1.750599</td><td>3.033470</td></tr> <tr><td>8 Fe</td><td>3.064127</td><td>2.146570</td><td>2.053899</td><td>2.794610</td><td>1.918612</td></tr> <tr> <td></td> <td>6</td> <td>7</td> <td>8</td> <td></td> <td></td> </tr> <tr><td>6 C</td><td>0.000000</td><td></td><td></td><td></td><td></td></tr> <tr><td>7 B</td><td>1.549839</td><td>0.000000</td><td></td><td></td><td></td></tr> <tr><td>8 Fe</td><td>2.000573</td><td>2.021890</td><td>0.000000</td><td></td><td></td></tr> </tbody> </table> |          | 1        | 2        | 3        | 4 | 5 | 1 P | 0.000000 |  |  |  |  | 2 B | 2.024219 | 0.000000 |  |  |  | 3 B  | 2.031966 | 2.609734 | 0.000000 |  |  | 4 B | 1.951155 | 1.892567 | 1.961285 | 0.000000 |  | 5 B  | 1.855270 | 1.883879 | 2.154071 | 2.886456 | 0.000000 | 6 C | 2.951211 | 2.547886 | 1.574255 | 1.622899 | 3.048489 | 7 B | 3.122932 | 1.710283 | 2.633102 | 1.750599 | 3.033470 | 8 Fe | 3.064127 | 2.146570 | 2.053899 | 2.794610 | 1.918612 |  | 6 | 7 | 8 |  |  | 6 C | 0.000000 |  |  |  |  | 7 B | 1.549839 | 0.000000 |  |  |  | 8 Fe | 2.000573 | 2.021890 | 0.000000 |  |  |
|                                                                                                                                                                                                                                 | 1                                                                                                                                                                                                                                                                                                                                                                                                                                                                                                                                                                                                                                                                                                                                                                                                                                                                                                                                                                                                                                                                                                                                                                                                                                                                                      | 2        | 3        | 4        | 5        |   |   |     |          |  |  |  |  |     |          |          |  |  |  |      |          |          |          |  |  |     |          |          |          |          |  |      |          |          |          |          |          |     |          |          |          |          |          |     |          |          |          |          |          |      |          |          |          |          |          |  |   |   |   |  |  |     |          |  |  |  |  |     |          |          |  |  |  |      |          |          |          |  |  |
| 1 P                                                                                                                                                                                                                             | 0.000000                                                                                                                                                                                                                                                                                                                                                                                                                                                                                                                                                                                                                                                                                                                                                                                                                                                                                                                                                                                                                                                                                                                                                                                                                                                                               |          |          |          |          |   |   |     |          |  |  |  |  |     |          |          |  |  |  |      |          |          |          |  |  |     |          |          |          |          |  |      |          |          |          |          |          |     |          |          |          |          |          |     |          |          |          |          |          |      |          |          |          |          |          |  |   |   |   |  |  |     |          |  |  |  |  |     |          |          |  |  |  |      |          |          |          |  |  |
| 2 B                                                                                                                                                                                                                             | 2.024219                                                                                                                                                                                                                                                                                                                                                                                                                                                                                                                                                                                                                                                                                                                                                                                                                                                                                                                                                                                                                                                                                                                                                                                                                                                                               | 0.000000 |          |          |          |   |   |     |          |  |  |  |  |     |          |          |  |  |  |      |          |          |          |  |  |     |          |          |          |          |  |      |          |          |          |          |          |     |          |          |          |          |          |     |          |          |          |          |          |      |          |          |          |          |          |  |   |   |   |  |  |     |          |  |  |  |  |     |          |          |  |  |  |      |          |          |          |  |  |
| 3 B                                                                                                                                                                                                                             | 2.031966                                                                                                                                                                                                                                                                                                                                                                                                                                                                                                                                                                                                                                                                                                                                                                                                                                                                                                                                                                                                                                                                                                                                                                                                                                                                               | 2.609734 | 0.000000 |          |          |   |   |     |          |  |  |  |  |     |          |          |  |  |  |      |          |          |          |  |  |     |          |          |          |          |  |      |          |          |          |          |          |     |          |          |          |          |          |     |          |          |          |          |          |      |          |          |          |          |          |  |   |   |   |  |  |     |          |  |  |  |  |     |          |          |  |  |  |      |          |          |          |  |  |
| 4 B                                                                                                                                                                                                                             | 1.951155                                                                                                                                                                                                                                                                                                                                                                                                                                                                                                                                                                                                                                                                                                                                                                                                                                                                                                                                                                                                                                                                                                                                                                                                                                                                               | 1.892567 | 1.961285 | 0.000000 |          |   |   |     |          |  |  |  |  |     |          |          |  |  |  |      |          |          |          |  |  |     |          |          |          |          |  |      |          |          |          |          |          |     |          |          |          |          |          |     |          |          |          |          |          |      |          |          |          |          |          |  |   |   |   |  |  |     |          |  |  |  |  |     |          |          |  |  |  |      |          |          |          |  |  |
| 5 B                                                                                                                                                                                                                             | 1.855270                                                                                                                                                                                                                                                                                                                                                                                                                                                                                                                                                                                                                                                                                                                                                                                                                                                                                                                                                                                                                                                                                                                                                                                                                                                                               | 1.883879 | 2.154071 | 2.886456 | 0.000000 |   |   |     |          |  |  |  |  |     |          |          |  |  |  |      |          |          |          |  |  |     |          |          |          |          |  |      |          |          |          |          |          |     |          |          |          |          |          |     |          |          |          |          |          |      |          |          |          |          |          |  |   |   |   |  |  |     |          |  |  |  |  |     |          |          |  |  |  |      |          |          |          |  |  |
| 6 C                                                                                                                                                                                                                             | 2.951211                                                                                                                                                                                                                                                                                                                                                                                                                                                                                                                                                                                                                                                                                                                                                                                                                                                                                                                                                                                                                                                                                                                                                                                                                                                                               | 2.547886 | 1.574255 | 1.622899 | 3.048489 |   |   |     |          |  |  |  |  |     |          |          |  |  |  |      |          |          |          |  |  |     |          |          |          |          |  |      |          |          |          |          |          |     |          |          |          |          |          |     |          |          |          |          |          |      |          |          |          |          |          |  |   |   |   |  |  |     |          |  |  |  |  |     |          |          |  |  |  |      |          |          |          |  |  |
| 7 B                                                                                                                                                                                                                             | 3.122932                                                                                                                                                                                                                                                                                                                                                                                                                                                                                                                                                                                                                                                                                                                                                                                                                                                                                                                                                                                                                                                                                                                                                                                                                                                                               | 1.710283 | 2.633102 | 1.750599 | 3.033470 |   |   |     |          |  |  |  |  |     |          |          |  |  |  |      |          |          |          |  |  |     |          |          |          |          |  |      |          |          |          |          |          |     |          |          |          |          |          |     |          |          |          |          |          |      |          |          |          |          |          |  |   |   |   |  |  |     |          |  |  |  |  |     |          |          |  |  |  |      |          |          |          |  |  |
| 8 Fe                                                                                                                                                                                                                            | 3.064127                                                                                                                                                                                                                                                                                                                                                                                                                                                                                                                                                                                                                                                                                                                                                                                                                                                                                                                                                                                                                                                                                                                                                                                                                                                                               | 2.146570 | 2.053899 | 2.794610 | 1.918612 |   |   |     |          |  |  |  |  |     |          |          |  |  |  |      |          |          |          |  |  |     |          |          |          |          |  |      |          |          |          |          |          |     |          |          |          |          |          |     |          |          |          |          |          |      |          |          |          |          |          |  |   |   |   |  |  |     |          |  |  |  |  |     |          |          |  |  |  |      |          |          |          |  |  |
|                                                                                                                                                                                                                                 | 6                                                                                                                                                                                                                                                                                                                                                                                                                                                                                                                                                                                                                                                                                                                                                                                                                                                                                                                                                                                                                                                                                                                                                                                                                                                                                      | 7        | 8        |          |          |   |   |     |          |  |  |  |  |     |          |          |  |  |  |      |          |          |          |  |  |     |          |          |          |          |  |      |          |          |          |          |          |     |          |          |          |          |          |     |          |          |          |          |          |      |          |          |          |          |          |  |   |   |   |  |  |     |          |  |  |  |  |     |          |          |  |  |  |      |          |          |          |  |  |
| 6 C                                                                                                                                                                                                                             | 0.000000                                                                                                                                                                                                                                                                                                                                                                                                                                                                                                                                                                                                                                                                                                                                                                                                                                                                                                                                                                                                                                                                                                                                                                                                                                                                               |          |          |          |          |   |   |     |          |  |  |  |  |     |          |          |  |  |  |      |          |          |          |  |  |     |          |          |          |          |  |      |          |          |          |          |          |     |          |          |          |          |          |     |          |          |          |          |          |      |          |          |          |          |          |  |   |   |   |  |  |     |          |  |  |  |  |     |          |          |  |  |  |      |          |          |          |  |  |
| 7 B                                                                                                                                                                                                                             | 1.549839                                                                                                                                                                                                                                                                                                                                                                                                                                                                                                                                                                                                                                                                                                                                                                                                                                                                                                                                                                                                                                                                                                                                                                                                                                                                               | 0.000000 |          |          |          |   |   |     |          |  |  |  |  |     |          |          |  |  |  |      |          |          |          |  |  |     |          |          |          |          |  |      |          |          |          |          |          |     |          |          |          |          |          |     |          |          |          |          |          |      |          |          |          |          |          |  |   |   |   |  |  |     |          |  |  |  |  |     |          |          |  |  |  |      |          |          |          |  |  |
| 8 Fe                                                                                                                                                                                                                            | 2.000573                                                                                                                                                                                                                                                                                                                                                                                                                                                                                                                                                                                                                                                                                                                                                                                                                                                                                                                                                                                                                                                                                                                                                                                                                                                                               | 2.021890 | 0.000000 |          |          |   |   |     |          |  |  |  |  |     |          |          |  |  |  |      |          |          |          |  |  |     |          |          |          |          |  |      |          |          |          |          |          |     |          |          |          |          |          |     |          |          |          |          |          |      |          |          |          |          |          |  |   |   |   |  |  |     |          |  |  |  |  |     |          |          |  |  |  |      |          |          |          |  |  |
|  <p style="text-align: center;">6. -2004.1893969 +12.5</p>                                                                                   | <table border="1"> <thead> <tr> <th></th> <th>1</th> <th>2</th> <th>3</th> <th>4</th> <th>5</th> </tr> </thead> <tbody> <tr><td>1 B</td><td>0.000000</td><td></td><td></td><td></td><td></td></tr> <tr><td>2 B</td><td>1.836853</td><td>0.000000</td><td></td><td></td><td></td></tr> <tr><td>3 P</td><td>2.030338</td><td>2.798771</td><td>0.000000</td><td></td><td></td></tr> <tr><td>4 C</td><td>1.582196</td><td>1.680691</td><td>2.958672</td><td>0.000000</td><td></td></tr> <tr><td>5 Fe</td><td>2.206775</td><td>2.065745</td><td>2.038044</td><td>3.235799</td><td>0.000000</td></tr> <tr><td>6 B</td><td>1.937535</td><td>2.463228</td><td>1.955542</td><td>1.636829</td><td>3.203693</td></tr> <tr><td>7 B</td><td>2.637798</td><td>1.779106</td><td>3.096759</td><td>1.534600</td><td>3.393064</td></tr> <tr><td>8 B</td><td>2.576132</td><td>1.847673</td><td>2.014686</td><td>2.497325</td><td>2.279414</td></tr> <tr> <td></td> <td>6</td> <td>7</td> <td>8</td> <td></td> <td></td> </tr> <tr><td>6 B</td><td>0.000000</td><td></td><td></td><td></td><td></td></tr> <tr><td>7 B</td><td>1.755060</td><td>0.000000</td><td></td><td></td><td></td></tr> <tr><td>8 B</td><td>1.940115</td><td>1.677174</td><td>0.000000</td><td></td><td></td></tr> </tbody> </table>  |          | 1        | 2        | 3        | 4 | 5 | 1 B | 0.000000 |  |  |  |  | 2 B | 1.836853 | 0.000000 |  |  |  | 3 P  | 2.030338 | 2.798771 | 0.000000 |  |  | 4 C | 1.582196 | 1.680691 | 2.958672 | 0.000000 |  | 5 Fe | 2.206775 | 2.065745 | 2.038044 | 3.235799 | 0.000000 | 6 B | 1.937535 | 2.463228 | 1.955542 | 1.636829 | 3.203693 | 7 B | 2.637798 | 1.779106 | 3.096759 | 1.534600 | 3.393064 | 8 B  | 2.576132 | 1.847673 | 2.014686 | 2.497325 | 2.279414 |  | 6 | 7 | 8 |  |  | 6 B | 0.000000 |  |  |  |  | 7 B | 1.755060 | 0.000000 |  |  |  | 8 B  | 1.940115 | 1.677174 | 0.000000 |  |  |
|                                                                                                                                                                                                                                 | 1                                                                                                                                                                                                                                                                                                                                                                                                                                                                                                                                                                                                                                                                                                                                                                                                                                                                                                                                                                                                                                                                                                                                                                                                                                                                                      | 2        | 3        | 4        | 5        |   |   |     |          |  |  |  |  |     |          |          |  |  |  |      |          |          |          |  |  |     |          |          |          |          |  |      |          |          |          |          |          |     |          |          |          |          |          |     |          |          |          |          |          |      |          |          |          |          |          |  |   |   |   |  |  |     |          |  |  |  |  |     |          |          |  |  |  |      |          |          |          |  |  |
| 1 B                                                                                                                                                                                                                             | 0.000000                                                                                                                                                                                                                                                                                                                                                                                                                                                                                                                                                                                                                                                                                                                                                                                                                                                                                                                                                                                                                                                                                                                                                                                                                                                                               |          |          |          |          |   |   |     |          |  |  |  |  |     |          |          |  |  |  |      |          |          |          |  |  |     |          |          |          |          |  |      |          |          |          |          |          |     |          |          |          |          |          |     |          |          |          |          |          |      |          |          |          |          |          |  |   |   |   |  |  |     |          |  |  |  |  |     |          |          |  |  |  |      |          |          |          |  |  |
| 2 B                                                                                                                                                                                                                             | 1.836853                                                                                                                                                                                                                                                                                                                                                                                                                                                                                                                                                                                                                                                                                                                                                                                                                                                                                                                                                                                                                                                                                                                                                                                                                                                                               | 0.000000 |          |          |          |   |   |     |          |  |  |  |  |     |          |          |  |  |  |      |          |          |          |  |  |     |          |          |          |          |  |      |          |          |          |          |          |     |          |          |          |          |          |     |          |          |          |          |          |      |          |          |          |          |          |  |   |   |   |  |  |     |          |  |  |  |  |     |          |          |  |  |  |      |          |          |          |  |  |
| 3 P                                                                                                                                                                                                                             | 2.030338                                                                                                                                                                                                                                                                                                                                                                                                                                                                                                                                                                                                                                                                                                                                                                                                                                                                                                                                                                                                                                                                                                                                                                                                                                                                               | 2.798771 | 0.000000 |          |          |   |   |     |          |  |  |  |  |     |          |          |  |  |  |      |          |          |          |  |  |     |          |          |          |          |  |      |          |          |          |          |          |     |          |          |          |          |          |     |          |          |          |          |          |      |          |          |          |          |          |  |   |   |   |  |  |     |          |  |  |  |  |     |          |          |  |  |  |      |          |          |          |  |  |
| 4 C                                                                                                                                                                                                                             | 1.582196                                                                                                                                                                                                                                                                                                                                                                                                                                                                                                                                                                                                                                                                                                                                                                                                                                                                                                                                                                                                                                                                                                                                                                                                                                                                               | 1.680691 | 2.958672 | 0.000000 |          |   |   |     |          |  |  |  |  |     |          |          |  |  |  |      |          |          |          |  |  |     |          |          |          |          |  |      |          |          |          |          |          |     |          |          |          |          |          |     |          |          |          |          |          |      |          |          |          |          |          |  |   |   |   |  |  |     |          |  |  |  |  |     |          |          |  |  |  |      |          |          |          |  |  |
| 5 Fe                                                                                                                                                                                                                            | 2.206775                                                                                                                                                                                                                                                                                                                                                                                                                                                                                                                                                                                                                                                                                                                                                                                                                                                                                                                                                                                                                                                                                                                                                                                                                                                                               | 2.065745 | 2.038044 | 3.235799 | 0.000000 |   |   |     |          |  |  |  |  |     |          |          |  |  |  |      |          |          |          |  |  |     |          |          |          |          |  |      |          |          |          |          |          |     |          |          |          |          |          |     |          |          |          |          |          |      |          |          |          |          |          |  |   |   |   |  |  |     |          |  |  |  |  |     |          |          |  |  |  |      |          |          |          |  |  |
| 6 B                                                                                                                                                                                                                             | 1.937535                                                                                                                                                                                                                                                                                                                                                                                                                                                                                                                                                                                                                                                                                                                                                                                                                                                                                                                                                                                                                                                                                                                                                                                                                                                                               | 2.463228 | 1.955542 | 1.636829 | 3.203693 |   |   |     |          |  |  |  |  |     |          |          |  |  |  |      |          |          |          |  |  |     |          |          |          |          |  |      |          |          |          |          |          |     |          |          |          |          |          |     |          |          |          |          |          |      |          |          |          |          |          |  |   |   |   |  |  |     |          |  |  |  |  |     |          |          |  |  |  |      |          |          |          |  |  |
| 7 B                                                                                                                                                                                                                             | 2.637798                                                                                                                                                                                                                                                                                                                                                                                                                                                                                                                                                                                                                                                                                                                                                                                                                                                                                                                                                                                                                                                                                                                                                                                                                                                                               | 1.779106 | 3.096759 | 1.534600 | 3.393064 |   |   |     |          |  |  |  |  |     |          |          |  |  |  |      |          |          |          |  |  |     |          |          |          |          |  |      |          |          |          |          |          |     |          |          |          |          |          |     |          |          |          |          |          |      |          |          |          |          |          |  |   |   |   |  |  |     |          |  |  |  |  |     |          |          |  |  |  |      |          |          |          |  |  |
| 8 B                                                                                                                                                                                                                             | 2.576132                                                                                                                                                                                                                                                                                                                                                                                                                                                                                                                                                                                                                                                                                                                                                                                                                                                                                                                                                                                                                                                                                                                                                                                                                                                                               | 1.847673 | 2.014686 | 2.497325 | 2.279414 |   |   |     |          |  |  |  |  |     |          |          |  |  |  |      |          |          |          |  |  |     |          |          |          |          |  |      |          |          |          |          |          |     |          |          |          |          |          |     |          |          |          |          |          |      |          |          |          |          |          |  |   |   |   |  |  |     |          |  |  |  |  |     |          |          |  |  |  |      |          |          |          |  |  |
|                                                                                                                                                                                                                                 | 6                                                                                                                                                                                                                                                                                                                                                                                                                                                                                                                                                                                                                                                                                                                                                                                                                                                                                                                                                                                                                                                                                                                                                                                                                                                                                      | 7        | 8        |          |          |   |   |     |          |  |  |  |  |     |          |          |  |  |  |      |          |          |          |  |  |     |          |          |          |          |  |      |          |          |          |          |          |     |          |          |          |          |          |     |          |          |          |          |          |      |          |          |          |          |          |  |   |   |   |  |  |     |          |  |  |  |  |     |          |          |  |  |  |      |          |          |          |  |  |
| 6 B                                                                                                                                                                                                                             | 0.000000                                                                                                                                                                                                                                                                                                                                                                                                                                                                                                                                                                                                                                                                                                                                                                                                                                                                                                                                                                                                                                                                                                                                                                                                                                                                               |          |          |          |          |   |   |     |          |  |  |  |  |     |          |          |  |  |  |      |          |          |          |  |  |     |          |          |          |          |  |      |          |          |          |          |          |     |          |          |          |          |          |     |          |          |          |          |          |      |          |          |          |          |          |  |   |   |   |  |  |     |          |  |  |  |  |     |          |          |  |  |  |      |          |          |          |  |  |
| 7 B                                                                                                                                                                                                                             | 1.755060                                                                                                                                                                                                                                                                                                                                                                                                                                                                                                                                                                                                                                                                                                                                                                                                                                                                                                                                                                                                                                                                                                                                                                                                                                                                               | 0.000000 |          |          |          |   |   |     |          |  |  |  |  |     |          |          |  |  |  |      |          |          |          |  |  |     |          |          |          |          |  |      |          |          |          |          |          |     |          |          |          |          |          |     |          |          |          |          |          |      |          |          |          |          |          |  |   |   |   |  |  |     |          |  |  |  |  |     |          |          |  |  |  |      |          |          |          |  |  |
| 8 B                                                                                                                                                                                                                             | 1.940115                                                                                                                                                                                                                                                                                                                                                                                                                                                                                                                                                                                                                                                                                                                                                                                                                                                                                                                                                                                                                                                                                                                                                                                                                                                                               | 1.677174 | 0.000000 |          |          |   |   |     |          |  |  |  |  |     |          |          |  |  |  |      |          |          |          |  |  |     |          |          |          |          |  |      |          |          |          |          |          |     |          |          |          |          |          |     |          |          |          |          |          |      |          |          |          |          |          |  |   |   |   |  |  |     |          |  |  |  |  |     |          |          |  |  |  |      |          |          |          |  |  |

| C <sub>1</sub> H/L 1.72                                                                                                                     |                                                                                                                                                                                                                                                                                                                                                                                                                                                                                                                                                                                                                                                                                                                                                                                                                                                                                                                                                                                                                                                                                                                                                                                                                                                                                                                                                                    |          |          |          |          |   |   |     |          |  |  |  |  |     |          |          |  |  |  |     |          |          |          |  |  |      |          |          |          |          |  |     |          |          |          |          |          |     |          |          |          |          |          |     |          |          |          |          |          |     |          |          |          |          |          |  |   |   |   |  |  |     |          |  |  |  |  |     |          |          |  |  |  |     |          |          |          |  |  |
|---------------------------------------------------------------------------------------------------------------------------------------------|--------------------------------------------------------------------------------------------------------------------------------------------------------------------------------------------------------------------------------------------------------------------------------------------------------------------------------------------------------------------------------------------------------------------------------------------------------------------------------------------------------------------------------------------------------------------------------------------------------------------------------------------------------------------------------------------------------------------------------------------------------------------------------------------------------------------------------------------------------------------------------------------------------------------------------------------------------------------------------------------------------------------------------------------------------------------------------------------------------------------------------------------------------------------------------------------------------------------------------------------------------------------------------------------------------------------------------------------------------------------|----------|----------|----------|----------|---|---|-----|----------|--|--|--|--|-----|----------|----------|--|--|--|-----|----------|----------|----------|--|--|------|----------|----------|----------|----------|--|-----|----------|----------|----------|----------|----------|-----|----------|----------|----------|----------|----------|-----|----------|----------|----------|----------|----------|-----|----------|----------|----------|----------|----------|--|---|---|---|--|--|-----|----------|--|--|--|--|-----|----------|----------|--|--|--|-----|----------|----------|----------|--|--|
| 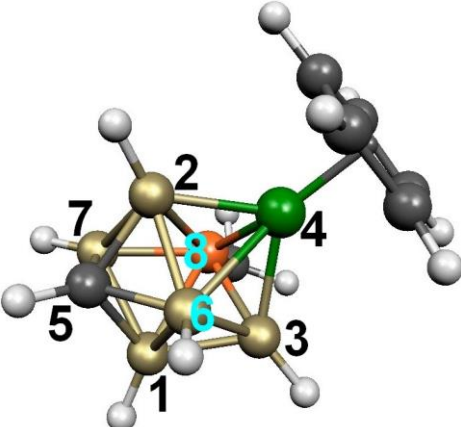 <p>7. -2004.1838728 +15.9<br/>C<sub>1</sub> H/L 1.71</p>  | <table border="1"> <thead> <tr> <th></th> <th>1</th> <th>2</th> <th>3</th> <th>4</th> <th>5</th> </tr> </thead> <tbody> <tr> <td>1 B</td> <td>0.000000</td> <td></td> <td></td> <td></td> <td></td> </tr> <tr> <td>2 B</td> <td>2.634533</td> <td>0.000000</td> <td></td> <td></td> <td></td> </tr> <tr> <td>3 B</td> <td>1.775145</td> <td>2.793354</td> <td>0.000000</td> <td></td> <td></td> </tr> <tr> <td>4 Fe</td> <td>3.050986</td> <td>1.977127</td> <td>1.953075</td> <td>0.000000</td> <td></td> </tr> <tr> <td>5 C</td> <td>1.644837</td> <td>1.617407</td> <td>2.771978</td> <td>3.066387</td> <td>0.000000</td> </tr> <tr> <td>6 B</td> <td>1.812625</td> <td>1.784833</td> <td>1.740447</td> <td>2.143135</td> <td>1.642172</td> </tr> <tr> <td>7 B</td> <td>1.888298</td> <td>2.089608</td> <td>3.014378</td> <td>3.219828</td> <td>1.543627</td> </tr> <tr> <td>8 P</td> <td>2.094095</td> <td>2.415253</td> <td>1.968741</td> <td>2.129597</td> <td>2.655587</td> </tr> <tr> <td></td> <th>6</th> <th>7</th> <th>8</th> <td></td> <td></td> </tr> <tr> <td>6 B</td> <td>0.000000</td> <td></td> <td></td> <td></td> <td></td> </tr> <tr> <td>7 B</td> <td>2.707391</td> <td>0.000000</td> <td></td> <td></td> <td></td> </tr> <tr> <td>8 P</td> <td>2.687006</td> <td>1.859935</td> <td>0.000000</td> <td></td> <td></td> </tr> </tbody> </table> |          | 1        | 2        | 3        | 4 | 5 | 1 B | 0.000000 |  |  |  |  | 2 B | 2.634533 | 0.000000 |  |  |  | 3 B | 1.775145 | 2.793354 | 0.000000 |  |  | 4 Fe | 3.050986 | 1.977127 | 1.953075 | 0.000000 |  | 5 C | 1.644837 | 1.617407 | 2.771978 | 3.066387 | 0.000000 | 6 B | 1.812625 | 1.784833 | 1.740447 | 2.143135 | 1.642172 | 7 B | 1.888298 | 2.089608 | 3.014378 | 3.219828 | 1.543627 | 8 P | 2.094095 | 2.415253 | 1.968741 | 2.129597 | 2.655587 |  | 6 | 7 | 8 |  |  | 6 B | 0.000000 |  |  |  |  | 7 B | 2.707391 | 0.000000 |  |  |  | 8 P | 2.687006 | 1.859935 | 0.000000 |  |  |
|                                                                                                                                             |                                                                                                                                                                                                                                                                                                                                                                                                                                                                                                                                                                                                                                                                                                                                                                                                                                                                                                                                                                                                                                                                                                                                                                                                                                                                                                                                                                    | 1        | 2        | 3        | 4        | 5 |   |     |          |  |  |  |  |     |          |          |  |  |  |     |          |          |          |  |  |      |          |          |          |          |  |     |          |          |          |          |          |     |          |          |          |          |          |     |          |          |          |          |          |     |          |          |          |          |          |  |   |   |   |  |  |     |          |  |  |  |  |     |          |          |  |  |  |     |          |          |          |  |  |
| 1 B                                                                                                                                         | 0.000000                                                                                                                                                                                                                                                                                                                                                                                                                                                                                                                                                                                                                                                                                                                                                                                                                                                                                                                                                                                                                                                                                                                                                                                                                                                                                                                                                           |          |          |          |          |   |   |     |          |  |  |  |  |     |          |          |  |  |  |     |          |          |          |  |  |      |          |          |          |          |  |     |          |          |          |          |          |     |          |          |          |          |          |     |          |          |          |          |          |     |          |          |          |          |          |  |   |   |   |  |  |     |          |  |  |  |  |     |          |          |  |  |  |     |          |          |          |  |  |
| 2 B                                                                                                                                         | 2.634533                                                                                                                                                                                                                                                                                                                                                                                                                                                                                                                                                                                                                                                                                                                                                                                                                                                                                                                                                                                                                                                                                                                                                                                                                                                                                                                                                           | 0.000000 |          |          |          |   |   |     |          |  |  |  |  |     |          |          |  |  |  |     |          |          |          |  |  |      |          |          |          |          |  |     |          |          |          |          |          |     |          |          |          |          |          |     |          |          |          |          |          |     |          |          |          |          |          |  |   |   |   |  |  |     |          |  |  |  |  |     |          |          |  |  |  |     |          |          |          |  |  |
| 3 B                                                                                                                                         | 1.775145                                                                                                                                                                                                                                                                                                                                                                                                                                                                                                                                                                                                                                                                                                                                                                                                                                                                                                                                                                                                                                                                                                                                                                                                                                                                                                                                                           | 2.793354 | 0.000000 |          |          |   |   |     |          |  |  |  |  |     |          |          |  |  |  |     |          |          |          |  |  |      |          |          |          |          |  |     |          |          |          |          |          |     |          |          |          |          |          |     |          |          |          |          |          |     |          |          |          |          |          |  |   |   |   |  |  |     |          |  |  |  |  |     |          |          |  |  |  |     |          |          |          |  |  |
| 4 Fe                                                                                                                                        | 3.050986                                                                                                                                                                                                                                                                                                                                                                                                                                                                                                                                                                                                                                                                                                                                                                                                                                                                                                                                                                                                                                                                                                                                                                                                                                                                                                                                                           | 1.977127 | 1.953075 | 0.000000 |          |   |   |     |          |  |  |  |  |     |          |          |  |  |  |     |          |          |          |  |  |      |          |          |          |          |  |     |          |          |          |          |          |     |          |          |          |          |          |     |          |          |          |          |          |     |          |          |          |          |          |  |   |   |   |  |  |     |          |  |  |  |  |     |          |          |  |  |  |     |          |          |          |  |  |
| 5 C                                                                                                                                         | 1.644837                                                                                                                                                                                                                                                                                                                                                                                                                                                                                                                                                                                                                                                                                                                                                                                                                                                                                                                                                                                                                                                                                                                                                                                                                                                                                                                                                           | 1.617407 | 2.771978 | 3.066387 | 0.000000 |   |   |     |          |  |  |  |  |     |          |          |  |  |  |     |          |          |          |  |  |      |          |          |          |          |  |     |          |          |          |          |          |     |          |          |          |          |          |     |          |          |          |          |          |     |          |          |          |          |          |  |   |   |   |  |  |     |          |  |  |  |  |     |          |          |  |  |  |     |          |          |          |  |  |
| 6 B                                                                                                                                         | 1.812625                                                                                                                                                                                                                                                                                                                                                                                                                                                                                                                                                                                                                                                                                                                                                                                                                                                                                                                                                                                                                                                                                                                                                                                                                                                                                                                                                           | 1.784833 | 1.740447 | 2.143135 | 1.642172 |   |   |     |          |  |  |  |  |     |          |          |  |  |  |     |          |          |          |  |  |      |          |          |          |          |  |     |          |          |          |          |          |     |          |          |          |          |          |     |          |          |          |          |          |     |          |          |          |          |          |  |   |   |   |  |  |     |          |  |  |  |  |     |          |          |  |  |  |     |          |          |          |  |  |
| 7 B                                                                                                                                         | 1.888298                                                                                                                                                                                                                                                                                                                                                                                                                                                                                                                                                                                                                                                                                                                                                                                                                                                                                                                                                                                                                                                                                                                                                                                                                                                                                                                                                           | 2.089608 | 3.014378 | 3.219828 | 1.543627 |   |   |     |          |  |  |  |  |     |          |          |  |  |  |     |          |          |          |  |  |      |          |          |          |          |  |     |          |          |          |          |          |     |          |          |          |          |          |     |          |          |          |          |          |     |          |          |          |          |          |  |   |   |   |  |  |     |          |  |  |  |  |     |          |          |  |  |  |     |          |          |          |  |  |
| 8 P                                                                                                                                         | 2.094095                                                                                                                                                                                                                                                                                                                                                                                                                                                                                                                                                                                                                                                                                                                                                                                                                                                                                                                                                                                                                                                                                                                                                                                                                                                                                                                                                           | 2.415253 | 1.968741 | 2.129597 | 2.655587 |   |   |     |          |  |  |  |  |     |          |          |  |  |  |     |          |          |          |  |  |      |          |          |          |          |  |     |          |          |          |          |          |     |          |          |          |          |          |     |          |          |          |          |          |     |          |          |          |          |          |  |   |   |   |  |  |     |          |  |  |  |  |     |          |          |  |  |  |     |          |          |          |  |  |
|                                                                                                                                             | 6                                                                                                                                                                                                                                                                                                                                                                                                                                                                                                                                                                                                                                                                                                                                                                                                                                                                                                                                                                                                                                                                                                                                                                                                                                                                                                                                                                  | 7        | 8        |          |          |   |   |     |          |  |  |  |  |     |          |          |  |  |  |     |          |          |          |  |  |      |          |          |          |          |  |     |          |          |          |          |          |     |          |          |          |          |          |     |          |          |          |          |          |     |          |          |          |          |          |  |   |   |   |  |  |     |          |  |  |  |  |     |          |          |  |  |  |     |          |          |          |  |  |
| 6 B                                                                                                                                         | 0.000000                                                                                                                                                                                                                                                                                                                                                                                                                                                                                                                                                                                                                                                                                                                                                                                                                                                                                                                                                                                                                                                                                                                                                                                                                                                                                                                                                           |          |          |          |          |   |   |     |          |  |  |  |  |     |          |          |  |  |  |     |          |          |          |  |  |      |          |          |          |          |  |     |          |          |          |          |          |     |          |          |          |          |          |     |          |          |          |          |          |     |          |          |          |          |          |  |   |   |   |  |  |     |          |  |  |  |  |     |          |          |  |  |  |     |          |          |          |  |  |
| 7 B                                                                                                                                         | 2.707391                                                                                                                                                                                                                                                                                                                                                                                                                                                                                                                                                                                                                                                                                                                                                                                                                                                                                                                                                                                                                                                                                                                                                                                                                                                                                                                                                           | 0.000000 |          |          |          |   |   |     |          |  |  |  |  |     |          |          |  |  |  |     |          |          |          |  |  |      |          |          |          |          |  |     |          |          |          |          |          |     |          |          |          |          |          |     |          |          |          |          |          |     |          |          |          |          |          |  |   |   |   |  |  |     |          |  |  |  |  |     |          |          |  |  |  |     |          |          |          |  |  |
| 8 P                                                                                                                                         | 2.687006                                                                                                                                                                                                                                                                                                                                                                                                                                                                                                                                                                                                                                                                                                                                                                                                                                                                                                                                                                                                                                                                                                                                                                                                                                                                                                                                                           | 1.859935 | 0.000000 |          |          |   |   |     |          |  |  |  |  |     |          |          |  |  |  |     |          |          |          |  |  |      |          |          |          |          |  |     |          |          |          |          |          |     |          |          |          |          |          |     |          |          |          |          |          |     |          |          |          |          |          |  |   |   |   |  |  |     |          |  |  |  |  |     |          |          |  |  |  |     |          |          |          |  |  |
|  <p>8. -2004.1820758 +17.1<br/>C<sub>1</sub> H/L 2.61</p> | <table border="1"> <thead> <tr> <th></th> <th>1</th> <th>2</th> <th>3</th> <th>4</th> <th>5</th> </tr> </thead> <tbody> <tr> <td>1 B</td> <td>0.000000</td> <td></td> <td></td> <td></td> <td></td> </tr> <tr> <td>2 P</td> <td>2.199029</td> <td>0.000000</td> <td></td> <td></td> <td></td> </tr> <tr> <td>3 B</td> <td>1.719695</td> <td>2.737727</td> <td>0.000000</td> <td></td> <td></td> </tr> <tr> <td>4 Fe</td> <td>2.920725</td> <td>2.176297</td> <td>2.059902</td> <td>0.000000</td> <td></td> </tr> <tr> <td>5 B</td> <td>2.741188</td> <td>2.021945</td> <td>2.941053</td> <td>1.980141</td> <td>0.000000</td> </tr> <tr> <td>6 B</td> <td>1.796336</td> <td>2.646279</td> <td>1.704558</td> <td>2.173626</td> <td>1.763244</td> </tr> <tr> <td>7 C</td> <td>1.654705</td> <td>1.866617</td> <td>2.753922</td> <td>2.855705</td> <td>1.576578</td> </tr> <tr> <td>8 B</td> <td>1.901926</td> <td>1.837040</td> <td>1.650978</td> <td>2.199652</td> <td>3.153570</td> </tr> <tr> <td></td> <th>6</th> <th>7</th> <th>8</th> <td></td> <td></td> </tr> <tr> <td>6 B</td> <td>0.000000</td> <td></td> <td></td> <td></td> <td></td> </tr> <tr> <td>7 C</td> <td>1.700494</td> <td>0.000000</td> <td></td> <td></td> <td></td> </tr> <tr> <td>8 B</td> <td>2.732300</td> <td>2.845502</td> <td>0.000000</td> <td></td> <td></td> </tr> </tbody> </table> |          | 1        | 2        | 3        | 4 | 5 | 1 B | 0.000000 |  |  |  |  | 2 P | 2.199029 | 0.000000 |  |  |  | 3 B | 1.719695 | 2.737727 | 0.000000 |  |  | 4 Fe | 2.920725 | 2.176297 | 2.059902 | 0.000000 |  | 5 B | 2.741188 | 2.021945 | 2.941053 | 1.980141 | 0.000000 | 6 B | 1.796336 | 2.646279 | 1.704558 | 2.173626 | 1.763244 | 7 C | 1.654705 | 1.866617 | 2.753922 | 2.855705 | 1.576578 | 8 B | 1.901926 | 1.837040 | 1.650978 | 2.199652 | 3.153570 |  | 6 | 7 | 8 |  |  | 6 B | 0.000000 |  |  |  |  | 7 C | 1.700494 | 0.000000 |  |  |  | 8 B | 2.732300 | 2.845502 | 0.000000 |  |  |
|                                                                                                                                             |                                                                                                                                                                                                                                                                                                                                                                                                                                                                                                                                                                                                                                                                                                                                                                                                                                                                                                                                                                                                                                                                                                                                                                                                                                                                                                                                                                    | 1        | 2        | 3        | 4        | 5 |   |     |          |  |  |  |  |     |          |          |  |  |  |     |          |          |          |  |  |      |          |          |          |          |  |     |          |          |          |          |          |     |          |          |          |          |          |     |          |          |          |          |          |     |          |          |          |          |          |  |   |   |   |  |  |     |          |  |  |  |  |     |          |          |  |  |  |     |          |          |          |  |  |
| 1 B                                                                                                                                         | 0.000000                                                                                                                                                                                                                                                                                                                                                                                                                                                                                                                                                                                                                                                                                                                                                                                                                                                                                                                                                                                                                                                                                                                                                                                                                                                                                                                                                           |          |          |          |          |   |   |     |          |  |  |  |  |     |          |          |  |  |  |     |          |          |          |  |  |      |          |          |          |          |  |     |          |          |          |          |          |     |          |          |          |          |          |     |          |          |          |          |          |     |          |          |          |          |          |  |   |   |   |  |  |     |          |  |  |  |  |     |          |          |  |  |  |     |          |          |          |  |  |
| 2 P                                                                                                                                         | 2.199029                                                                                                                                                                                                                                                                                                                                                                                                                                                                                                                                                                                                                                                                                                                                                                                                                                                                                                                                                                                                                                                                                                                                                                                                                                                                                                                                                           | 0.000000 |          |          |          |   |   |     |          |  |  |  |  |     |          |          |  |  |  |     |          |          |          |  |  |      |          |          |          |          |  |     |          |          |          |          |          |     |          |          |          |          |          |     |          |          |          |          |          |     |          |          |          |          |          |  |   |   |   |  |  |     |          |  |  |  |  |     |          |          |  |  |  |     |          |          |          |  |  |
| 3 B                                                                                                                                         | 1.719695                                                                                                                                                                                                                                                                                                                                                                                                                                                                                                                                                                                                                                                                                                                                                                                                                                                                                                                                                                                                                                                                                                                                                                                                                                                                                                                                                           | 2.737727 | 0.000000 |          |          |   |   |     |          |  |  |  |  |     |          |          |  |  |  |     |          |          |          |  |  |      |          |          |          |          |  |     |          |          |          |          |          |     |          |          |          |          |          |     |          |          |          |          |          |     |          |          |          |          |          |  |   |   |   |  |  |     |          |  |  |  |  |     |          |          |  |  |  |     |          |          |          |  |  |
| 4 Fe                                                                                                                                        | 2.920725                                                                                                                                                                                                                                                                                                                                                                                                                                                                                                                                                                                                                                                                                                                                                                                                                                                                                                                                                                                                                                                                                                                                                                                                                                                                                                                                                           | 2.176297 | 2.059902 | 0.000000 |          |   |   |     |          |  |  |  |  |     |          |          |  |  |  |     |          |          |          |  |  |      |          |          |          |          |  |     |          |          |          |          |          |     |          |          |          |          |          |     |          |          |          |          |          |     |          |          |          |          |          |  |   |   |   |  |  |     |          |  |  |  |  |     |          |          |  |  |  |     |          |          |          |  |  |
| 5 B                                                                                                                                         | 2.741188                                                                                                                                                                                                                                                                                                                                                                                                                                                                                                                                                                                                                                                                                                                                                                                                                                                                                                                                                                                                                                                                                                                                                                                                                                                                                                                                                           | 2.021945 | 2.941053 | 1.980141 | 0.000000 |   |   |     |          |  |  |  |  |     |          |          |  |  |  |     |          |          |          |  |  |      |          |          |          |          |  |     |          |          |          |          |          |     |          |          |          |          |          |     |          |          |          |          |          |     |          |          |          |          |          |  |   |   |   |  |  |     |          |  |  |  |  |     |          |          |  |  |  |     |          |          |          |  |  |
| 6 B                                                                                                                                         | 1.796336                                                                                                                                                                                                                                                                                                                                                                                                                                                                                                                                                                                                                                                                                                                                                                                                                                                                                                                                                                                                                                                                                                                                                                                                                                                                                                                                                           | 2.646279 | 1.704558 | 2.173626 | 1.763244 |   |   |     |          |  |  |  |  |     |          |          |  |  |  |     |          |          |          |  |  |      |          |          |          |          |  |     |          |          |          |          |          |     |          |          |          |          |          |     |          |          |          |          |          |     |          |          |          |          |          |  |   |   |   |  |  |     |          |  |  |  |  |     |          |          |  |  |  |     |          |          |          |  |  |
| 7 C                                                                                                                                         | 1.654705                                                                                                                                                                                                                                                                                                                                                                                                                                                                                                                                                                                                                                                                                                                                                                                                                                                                                                                                                                                                                                                                                                                                                                                                                                                                                                                                                           | 1.866617 | 2.753922 | 2.855705 | 1.576578 |   |   |     |          |  |  |  |  |     |          |          |  |  |  |     |          |          |          |  |  |      |          |          |          |          |  |     |          |          |          |          |          |     |          |          |          |          |          |     |          |          |          |          |          |     |          |          |          |          |          |  |   |   |   |  |  |     |          |  |  |  |  |     |          |          |  |  |  |     |          |          |          |  |  |
| 8 B                                                                                                                                         | 1.901926                                                                                                                                                                                                                                                                                                                                                                                                                                                                                                                                                                                                                                                                                                                                                                                                                                                                                                                                                                                                                                                                                                                                                                                                                                                                                                                                                           | 1.837040 | 1.650978 | 2.199652 | 3.153570 |   |   |     |          |  |  |  |  |     |          |          |  |  |  |     |          |          |          |  |  |      |          |          |          |          |  |     |          |          |          |          |          |     |          |          |          |          |          |     |          |          |          |          |          |     |          |          |          |          |          |  |   |   |   |  |  |     |          |  |  |  |  |     |          |          |  |  |  |     |          |          |          |  |  |
|                                                                                                                                             | 6                                                                                                                                                                                                                                                                                                                                                                                                                                                                                                                                                                                                                                                                                                                                                                                                                                                                                                                                                                                                                                                                                                                                                                                                                                                                                                                                                                  | 7        | 8        |          |          |   |   |     |          |  |  |  |  |     |          |          |  |  |  |     |          |          |          |  |  |      |          |          |          |          |  |     |          |          |          |          |          |     |          |          |          |          |          |     |          |          |          |          |          |     |          |          |          |          |          |  |   |   |   |  |  |     |          |  |  |  |  |     |          |          |  |  |  |     |          |          |          |  |  |
| 6 B                                                                                                                                         | 0.000000                                                                                                                                                                                                                                                                                                                                                                                                                                                                                                                                                                                                                                                                                                                                                                                                                                                                                                                                                                                                                                                                                                                                                                                                                                                                                                                                                           |          |          |          |          |   |   |     |          |  |  |  |  |     |          |          |  |  |  |     |          |          |          |  |  |      |          |          |          |          |  |     |          |          |          |          |          |     |          |          |          |          |          |     |          |          |          |          |          |     |          |          |          |          |          |  |   |   |   |  |  |     |          |  |  |  |  |     |          |          |  |  |  |     |          |          |          |  |  |
| 7 C                                                                                                                                         | 1.700494                                                                                                                                                                                                                                                                                                                                                                                                                                                                                                                                                                                                                                                                                                                                                                                                                                                                                                                                                                                                                                                                                                                                                                                                                                                                                                                                                           | 0.000000 |          |          |          |   |   |     |          |  |  |  |  |     |          |          |  |  |  |     |          |          |          |  |  |      |          |          |          |          |  |     |          |          |          |          |          |     |          |          |          |          |          |     |          |          |          |          |          |     |          |          |          |          |          |  |   |   |   |  |  |     |          |  |  |  |  |     |          |          |  |  |  |     |          |          |          |  |  |
| 8 B                                                                                                                                         | 2.732300                                                                                                                                                                                                                                                                                                                                                                                                                                                                                                                                                                                                                                                                                                                                                                                                                                                                                                                                                                                                                                                                                                                                                                                                                                                                                                                                                           | 2.845502 | 0.000000 |          |          |   |   |     |          |  |  |  |  |     |          |          |  |  |  |     |          |          |          |  |  |      |          |          |          |          |  |     |          |          |          |          |          |     |          |          |          |          |          |     |          |          |          |          |          |     |          |          |          |          |          |  |   |   |   |  |  |     |          |  |  |  |  |     |          |          |  |  |  |     |          |          |          |  |  |

Table S1C. Energy ranking for all of the CpFeCHPHB<sub>5</sub>H<sub>5</sub> optimized structures:

| No | Initial structure             | Final energy (a.u.) | ΔE (kcal/mol) |
|----|-------------------------------|---------------------|---------------|
| 1  | 09b-DicapTrPr-Fe1P2C5         | -1964.9367924       | 0.00          |
| 2  | 07b-Tdallcap-Fe1P1C1          | -1964.9367913       | 0.00          |
| 3  | 10b-DicapTrPrism-Fe3P1C4      | -1964.9367840       | 0.01          |
| 4  | 10b-DicapTrPrism-Fe2P2C1_r-12 | -1964.9367755       | 0.01          |
| 5  | 06b-Bipirhex-Fe2P1C1          | -1964.9367630       | 0.02          |
| 6  | 09a-DicapTrPr-Fe2C4P2         | -1964.9367622       | 0.02          |
| 7  | 08a-Nido-Fe2C4P1              | -1964.9367468       | 0.03          |
| 8  | 10b-DicapTrPrism-Fe2P2C1_i-12 | -1964.9367436       | 0.03          |
| 9  | 07b-Tdallcap-Fe2P1C4          | -1964.9367383       | 0.03          |
| 10 | 10a-DicapTrPrism-Fe2C1P2      | -1964.9367318       | 0.04          |
| 11 | 05b-Bisdisph-Fe1P4C2          | -1964.9367224       | 0.04          |
| 12 | 08a-Nido-Fe1C1P6_r-15         | -1964.9367125       | 0.05          |
| 13 | 09a-DicapTrPr-Fe1C1P6         | -1964.9367114       | 0.05          |
| 14 | 09b-DicapTrPr-Fe1P1C6         | -1964.9367056       | 0.05          |
| 15 | 08b-Nido-Fe1P1C4_i-28         | -1964.9367050       | 0.05          |
| 16 | 09a-DicapTrPr-Fe1C1P2         | -1964.9367041       | 0.06          |
| 17 | 10b-DicapTrPrism-Fe1P1C1      | -1964.9366996       | 0.06          |
| 18 | 09b-DicapTrPr-Fe3P1C4_r-10    | -1964.9366991       | 0.06          |
| 19 | 02a-Antipr-FeC1P4             | -1964.9366975       | 0.06          |
| 20 | 04a-AntiprTrig-FeC3P2         | -1964.9366975       | 0.06          |
| 21 | 04b-AntiprTriP-FeP3C2         | -1964.9366975       | 0.06          |
| 22 | 10b-DicapTrPrism-Fe3P3C2      | -1964.9366935       | 0.06          |
| 23 | 06b-Bipirhex-Fe2P1C2          | -1964.9366924       | 0.06          |
| 24 | 10b-DicapTrPrism-Fe2P1C3      | -1964.9366911       | 0.06          |
| 25 | 06b-Bipirhex-Fe2P2C1          | -1964.9366892       | 0.06          |
| 26 | 08b-Nido-Fe1P2C1              | -1964.9366840       | 0.07          |
| 27 | 11b-DicapOh-Fe1P1C5           | -1964.9366828       | 0.07          |
| 28 | 05b-Bisdisph-Fe1P1C2          | -1964.9366780       | 0.07          |
| 29 | 10b-DicapTrPrism-Fe3P1C3      | -1964.9366748       | 0.07          |
| 30 | 09b-DicapTrPr-Fe1P1C2         | -1964.9366674       | 0.08          |
| 31 | 09b-DicapTrPr-Fe1P2C4         | -1964.9366673       | 0.08          |
| 32 | 08a-Nido-Fe1C1P6_i-15         | -1964.9366627       | 0.08          |
| 33 | 10b-DicapTrPrism-Fe3P3C3      | -1964.9366587       | 0.08          |
| 34 | 09a-DicapTrPr-Fe1C2P4         | -1964.9366577       | 0.08          |
| 35 | 06a-Bipirhex-Fe2C2P1          | -1964.9366487       | 0.09          |
| 36 | 09a-DicapTrPr-Fe1C2P5         | -1964.9366397       | 0.10          |
| 37 | 09b-DicapTrPr-Fe3P1C4_i-10    | -1964.9366396       | 0.10          |
| 38 | 04b-AntiprTriP-FeP1C2         | -1964.9366394       | 0.10          |
| 39 | 10a-DicapTrPrism-Fe3C5P2      | -1964.9366277       | 0.10          |

|    |                               |               |      |
|----|-------------------------------|---------------|------|
| 40 | 08b-Nido-Fe1P1C4_r-28         | -1964.9366081 | 0.12 |
| 41 | 09a-DicapTrPr-Fe3C1P4         | -1964.9365875 | 0.13 |
| 42 | 07a-Tdallcap-Fe1C1P1          | -1964.9336389 | 1.98 |
| 43 | 02a-Antipr-FeC1P2             | -1964.9336191 | 1.99 |
| 44 | 10a-DicapTrPrism-Fe3C1P3      | -1964.9335778 | 2.02 |
| 45 | 10a-DicapTrPrism-Fe1C1P1_i-30 | -1964.9335708 | 2.02 |
| 46 | 09b-DicapTrPr-Fe2P4C2         | -1964.9335644 | 2.03 |
| 47 | 05b-Bisdisph-Fe2P1C4          | -1964.9335582 | 2.03 |
| 48 | 10a-DicapTrPrism-Fe3C1P4      | -1964.9335535 | 2.03 |
| 49 | 11b-DicapOh-Fe3P1C4           | -1964.9335530 | 2.03 |
| 50 | 10a-DicapTrPrism-Fe1C1P1_r-30 | -1964.9335525 | 2.03 |
| 51 | 11b-DicapOh-Fe3P2C5           | -1964.9335515 | 2.03 |
| 52 | 09b-DicapTrPr-Fe2P1C5         | -1964.9335487 | 2.04 |
| 53 | 06a-Bipirhex-Fe2C1P1_i-30     | -1964.9335462 | 2.04 |
| 54 | 02b-Antipr-FeP1C2             | -1964.9335455 | 2.04 |
| 55 | 07a-Tdallcap-Fe2C1P4          | -1964.9335412 | 2.04 |
| 56 | 05a-Bisdisph-Fe1C1P2          | -1964.9335395 | 2.04 |
| 57 | 10a-DicapTrPrism-Fe2C2P2_i-27 | -1964.9335383 | 2.04 |
| 58 | 09a-DicapTrPr-Fe3C3P3_i-16    | -1964.9335350 | 2.04 |
| 59 | 07a-Tdallcap-Fe2C1P6          | -1964.9335345 | 2.04 |
| 60 | 08a-Nido-Fe2C1P5              | -1964.9335250 | 2.05 |
| 61 | 08b-Nido-Fe2P4C2              | -1964.9335228 | 2.05 |
| 62 | 09b-DicapTrPr-Fe3P2C4         | -1964.9335221 | 2.05 |
| 63 | 11a-DicapOh-Fe3C1P4           | -1964.9335176 | 2.06 |
| 64 | 10b-DicapTrPrism-Fe2P2C2      | -1964.9335150 | 2.06 |
| 65 | 08b-Nido-Fe1P2C2              | -1964.9335144 | 2.06 |
| 66 | 02b-Antipr-FeP1C4             | -1964.9335102 | 2.06 |
| 67 | 08a-Nido-Fe1C1P4              | -1964.9335092 | 2.06 |
| 68 | 09a-DicapTrPr-Fe3C3P3_r-16    | -1964.9335081 | 2.06 |
| 69 | 10a-DicapTrPrism-Fe2C2P2_r-27 | -1964.9335035 | 2.06 |
| 70 | 10b-DicapTrPrism-Fe1P2C2      | -1964.9334875 | 2.07 |
| 71 | 08a-Nido-Fe1C2P1_r-20         | -1964.9334847 | 2.08 |
| 72 | 10a-DicapTrPrism-Fe1C1P5      | -1964.9334826 | 2.08 |
| 73 | 10b-DicapTrPrism-Fe2P1C2      | -1964.9334736 | 2.08 |
| 74 | 08a-Nido-Fe1C2P1_i-20         | -1964.9334727 | 2.08 |
| 75 | 10a-DicapTrPrism-Fe2C2P1      | -1964.9334720 | 2.08 |
| 76 | 10a-DicapTrPrism-Fe1C2P1      | -1964.9334691 | 2.09 |
| 77 | 05a-Bisdisph-Fe2C1P1          | -1964.9334681 | 2.09 |
| 78 | 10b-DicapTrPrism-Fe1P2C1      | -1964.9334520 | 2.10 |
| 79 | 06a-Bipirhex-Fe2C1P1_r-30     | -1964.9334176 | 2.12 |
| 80 | 10b-DicapTrPrism-Fe3P2C2      | -1964.9303766 | 4.03 |
| 81 | 03b-TriPyr-FeP1C6             | -1964.9303750 | 4.03 |

|     |                               |               |      |
|-----|-------------------------------|---------------|------|
| 82  | 05a-Bisdisph-Fe1C1P4          | -1964.9303698 | 4.03 |
| 83  | 02b-Antipr-FeP1C5             | -1964.9303690 | 4.03 |
| 84  | 03b-TriPyr-FeP1C1             | -1964.9303677 | 4.03 |
| 85  | 03a-TrigPyr-FeC2P3            | -1964.9303676 | 4.03 |
| 86  | 04b-AntiprTriP-FeP2C5         | -1964.9303676 | 4.03 |
| 87  | 01b-Cube-FeP1C4               | -1964.9303668 | 4.03 |
| 88  | 10a-DicapTrPrism-Fe2C3P2_i-22 | -1964.9303660 | 4.03 |
| 89  | 10b-DicapTrPrism-Fe2P3C1      | -1964.9303649 | 4.03 |
| 90  | 10a-DicapTrPrism-Fe2C3P2_r-22 | -1964.9303619 | 4.04 |
| 91  | 09b-DicapTrPr-Fe2P1C2         | -1964.9303571 | 4.04 |
| 92  | 09a-DicapTrPr-Fe2C2P3         | -1964.9303532 | 4.04 |
| 93  | 09b-DicapTrPr-Fe1P1C3         | -1964.9303517 | 4.04 |
| 94  | 07a-Tdallcap-Fe1C2P3          | -1964.9303468 | 4.04 |
| 95  | 07a-Tdallcap-Fe2C2P3          | -1964.9303464 | 4.04 |
| 96  | 10b-DicapTrPrism-Fe3P2C3      | -1964.9303452 | 4.05 |
| 97  | 07b-Tdallcap-Fe2P3C1          | -1964.9303440 | 4.05 |
| 98  | 10a-DicapTrPrism-Fe2C2P4      | -1964.9303320 | 4.05 |
| 99  | 07a-Tdallcap-Fe1C1P2          | -1964.9303317 | 4.05 |
| 100 | 11a-DicapOh-Fe3C3P1           | -1964.9303310 | 4.05 |
| 101 | 05a-Bisdisph-Fe1C2P2          | -1964.9303306 | 4.05 |
| 102 | 07a-Tdallcap-Fe2C1P3          | -1964.9303280 | 4.06 |
| 103 | 05a-Bisdisph-Fe1C3P2          | -1964.9303214 | 4.06 |
| 104 | 10a-DicapTrPrism-Fe2C1P5      | -1964.9303179 | 4.06 |
| 105 | 08b-Nido-Fe1P1C3              | -1964.9303140 | 4.07 |
| 106 | 09a-DicapTrPr-Fe2C2P1         | -1964.9303127 | 4.07 |
| 107 | 11a-DicapOh-Fe3C3P2           | -1964.9303062 | 4.07 |
| 108 | 05a-Bisdisph-Fe1C2P3          | -1964.9302997 | 4.07 |
| 109 | 08b-Nido-Fe1P3C3              | -1964.9302992 | 4.07 |
| 110 | 09a-DicapTrPr-Fe2C2P2         | -1964.9302910 | 4.08 |
| 111 | 08b-Nido-Fe1P3C2              | -1964.9302905 | 4.08 |
| 112 | 09b-DicapTrPr-Fe3P4C2         | -1964.9302815 | 4.09 |
| 113 | 10a-DicapTrPrism-Fe3C1P6      | -1964.9302740 | 4.09 |
| 114 | 05a-Bisdisph-Fe2C1P3          | -1964.9301437 | 4.17 |
| 115 | 06a-Bipirhex-Fe2C2P4          | -1964.9299117 | 4.32 |
| 116 | 10b-DicapTrPrism-Fe2P1C5      | -1964.9240661 | 7.99 |
| 117 | 05b-Bisdisph-Fe1P3C2          | -1964.9240233 | 8.01 |
| 118 | 10a-DicapTrPrism-Fe3C2P3      | -1964.9240184 | 8.02 |
| 119 | 09a-DicapTrPr-Fe2C1P2         | -1964.9240113 | 8.02 |
| 120 | 10a-DicapTrPrism-Fe3C2P2      | -1964.9240092 | 8.02 |
| 121 | 07b-Tdallcap-Fe2P2C3          | -1964.9239893 | 8.03 |
| 122 | 03b-TriPyr-FeP1C5             | -1964.9239868 | 8.04 |
| 123 | 05b-Bisdisph-Fe1P2C2          | -1964.9239841 | 8.04 |



|     |                          |               |       |
|-----|--------------------------|---------------|-------|
| 124 | 07b-Tdallcap-Fe2P1C3     | -1964.9239817 | 8.04  |
| 125 | 08a-Nido-Fe1C3P3         | -1964.9239784 | 8.04  |
| 126 | 07b-Tdallcap-Fe2P3C2     | -1964.9239777 | 8.04  |
| 127 | 07a-Tdallcap-Fe2C3P1     | -1964.9239741 | 8.04  |
| 128 | 09a-DicapTrPr-Fe2C3P3    | -1964.9239699 | 8.05  |
| 129 | 11a-DicapOh-Fe3C2P3      | -1964.9239686 | 8.05  |
| 130 | 02a-Antipr-FeC3P3        | -1964.9239540 | 8.06  |
| 131 | 08a-Nido-Fe1C2P3         | -1964.9239515 | 8.06  |
| 132 | 09a-DicapTrPr-Fe2C3P2    | -1964.9239472 | 8.06  |
| 133 | 09b-DicapTrPr-Fe2P2C3    | -1964.9239406 | 8.06  |
| 134 | 09b-DicapTrPr-Fe3P5C2    | -1964.9238864 | 8.10  |
| 135 | 10a-DicapTrPrism-Fe2C3P1 | -1964.9227790 | 8.79  |
| 136 | 04a-AntiprTrig-FeC2P1    | -1964.9213406 | 9.70  |
| 137 | 04b-AntiprTriP-FeP2C1    | -1964.9213399 | 9.70  |
| 138 | 01a-Cube-FeC2P1          | -1964.9213385 | 9.70  |
| 139 | 01b-Cube-FeP2C1_r-13     | -1964.9213344 | 9.70  |
| 140 | 11a-DicapOh-Fe1C1P6      | -1964.9213163 | 9.71  |
| 141 | 11a-DicapOh-Fe3C2P5      | -1964.9212929 | 9.73  |
| 142 | 06a-Bipirhex-Fe1C1P2     | -1964.9212688 | 9.74  |
| 143 | 11b-DicapOh-Fe3P5C2      | -1964.9212554 | 9.75  |
| 144 | 11b-DicapOh-Fe1P1C6      | -1964.9212528 | 9.75  |
| 145 | 06b-Bipirhex-Fe1P1C2     | -1964.9212227 | 9.77  |
| 146 | 08a-Nido-Fe1C1P2         | -1964.9211972 | 9.79  |
| 147 | 01b-Cube-FeP2C1_i-13     | -1964.9210319 | 9.89  |
| 148 | 10a-DicapTrPrism-Fe1C2P3 | -1964.9209008 | 9.97  |
| 149 | 10b-DicapTrPrism-Fe3P1C2 | -1964.9207742 | 10.05 |
| 150 | 08b-Nido-Fe1P1C5         | -1964.9207525 | 10.07 |
| 151 | 08a-Nido-Fe1C1P5         | -1964.9206679 | 10.12 |
| 152 | 09a-DicapTrPr-Fe3C4P3    | -1964.9206341 | 10.14 |
| 153 | 09a-DicapTrPr-Fe3C2P2    | -1964.9206319 | 10.14 |
| 154 | 09a-DicapTrPr-Fe3C4P1    | -1964.9205373 | 10.20 |
| 155 | 10a-DicapTrPrism-Fe1C3P4 | -1964.9205196 | 10.21 |
| 156 | 11b-DicapOh-Fe3P2C3      | -1964.9204864 | 10.23 |
| 157 | 09a-DicapTrPr-Fe2C6P1    | -1964.9139735 | 14.32 |
| 158 | 10b-DicapTrPrism-Fe1P2C4 | -1964.9139722 | 14.32 |
| 159 | 09b-DicapTrPr-Fe1P2C2    | -1964.9139663 | 14.32 |
| 160 | 09b-DicapTrPr-Fe2P3C2    | -1964.9139578 | 14.33 |
| 161 | 05b-Bisdisph-Fe2P2C2     | -1964.9139502 | 14.33 |
| 162 | 02a-Antipr-FeC1P5        | -1964.9137789 | 14.44 |
| 163 | 09b-DicapTrPr-Fe2P2C2    | -1964.9137601 | 14.45 |
| 164 | 09a-DicapTrPr-Fe1C1P3    | -1964.9137424 | 14.46 |
| 165 | 10b-DicapTrPrism-Fe1P3C4 | -1964.9137379 | 14.47 |

|     |                               |               |       |
|-----|-------------------------------|---------------|-------|
| 166 | 05b-Bisdisph-Fe2P1C3          | -1964.9137199 | 14.48 |
| 167 | 10b-DicapTrPrism-Fe3P1C6      | -1964.9136775 | 14.51 |
| 168 | 05b-Bisdisph-Fe1P1C4          | -1964.9136451 | 14.53 |
| 169 | 10b-DicapTrPrism-Fe2P3C2      | -1964.9135873 | 14.56 |
| 170 | 07b-Tdallcap-Fe2P1C6          | -1964.9124554 | 15.27 |
| 171 | 10b-DicapTrPrism-Fe1P1C5      | -1964.9124059 | 15.30 |
| 172 | 08a-Nido-Fe1C2P2              | -1964.9122981 | 15.37 |
| 173 | 08a-Nido-Fe1C3P2              | -1964.9121430 | 15.47 |
| 174 | 10b-DicapTrPrism-Fe2P2C4      | -1964.9121015 | 15.49 |
| 175 | 01b-Cube-FeP1C3_i-15          | -1964.9120890 | 15.50 |
| 176 | 09b-DicapTrPr-Fe2P6C1         | -1964.9120829 | 15.51 |
| 177 | 11b-DicapOh-Fe3P2C4_r-14      | -1964.9120595 | 15.52 |
| 178 | 06b-Bipirhex-Fe1P1C3          | -1964.9120115 | 15.55 |
| 179 | 01b-Cube-FeP1C3_r-15          | -1964.9120042 | 15.56 |
| 180 | 06a-Bipirhex-Fe1C1P3          | -1964.9119989 | 15.56 |
| 181 | 07b-Tdallcap-Fe1P1C4          | -1964.9119955 | 15.56 |
| 182 | 09b-DicapTrPr-Fe2P1C3         | -1964.9119574 | 15.58 |
| 183 | 01a-Cube-FeC1P3               | -1964.9119419 | 15.59 |
| 184 | 11b-DicapOh-Fe3P4C3           | -1964.9116778 | 15.76 |
| 185 | 07b-Tdallcap-Fe1P2C3          | -1964.9116396 | 15.78 |
| 186 | 10b-DicapTrPrism-Fe1P3C3      | -1964.9095971 | 17.07 |
| 187 | 11b-DicapOh-Fe1P2C3           | -1964.9095851 | 17.07 |
| 188 | 09a-DicapTrPr-Fe2C2P4         | -1964.9095758 | 17.08 |
| 189 | 05a-Bisdisph-Fe2C1P2          | -1964.9095729 | 17.08 |
| 190 | 08b-Nido-Fe2P1C2              | -1964.9095639 | 17.09 |
| 191 | 05a-Bisdisph-Fe2C2P4          | -1964.9095526 | 17.09 |
| 192 | 02b-Antipr-FeP3C3             | -1964.9095477 | 17.10 |
| 193 | 08a-Nido-Fe2C3P4              | -1964.9095454 | 17.10 |
| 194 | 10a-DicapTrPrism-Fe3C3P2      | -1964.9095428 | 17.10 |
| 195 | 10a-DicapTrPrism-Fe3C4P3      | -1964.9095427 | 17.10 |
| 196 | 10a-DicapTrPrism-Fe3C3P3      | -1964.9095404 | 17.10 |
| 197 | 02a-Antipr-FeC2P2             | -1964.9095386 | 17.10 |
| 198 | 05a-Bisdisph-Fe2C4P1          | -1964.9095366 | 17.10 |
| 199 | 10b-DicapTrPrism-Fe1P1C4_r-32 | -1964.9095323 | 17.11 |
| 200 | 08b-Nido-Fe2P1C3              | -1964.9095289 | 17.11 |
| 201 | 11b-DicapOh-Fe1P1C3           | -1964.9094989 | 17.13 |
| 202 | 09b-DicapTrPr-Fe1P2C3         | -1964.9094969 | 17.13 |
| 203 | 10b-DicapTrPrism-Fe1P1C3      | -1964.9094947 | 17.13 |
| 204 | 08b-Nido-Fe1P3C1              | -1964.9094534 | 17.16 |
| 205 | 11a-DicapOh-Fe3C4P3           | -1964.9094122 | 17.18 |
| 206 | 11a-DicapOh-Fe2C2P3           | -1964.9094089 | 17.18 |
| 207 | 11b-DicapOh-Fe3P3C3           | -1964.9094069 | 17.18 |

|     |                               |               |       |
|-----|-------------------------------|---------------|-------|
| 208 | 09b-DicapTrPr-Fe3P2C3         | -1964.9060765 | 19.27 |
| 209 | 11a-DicapOh-Fe3C1P3           | -1964.9060710 | 19.28 |
| 210 | 11a-DicapOh-Fe2C2P2           | -1964.9060644 | 19.28 |
| 211 | 11b-DicapOh-Fe2P2C2           | -1964.9060333 | 19.30 |
| 212 | 09b-DicapTrPr-Fe3P1C2         | -1964.9060277 | 19.31 |
| 213 | 08a-Nido-Fe1C1P3              | -1964.9060212 | 19.31 |
| 214 | 10b-DicapTrPrism-Fe1P1C4_i-32 | -1964.9089081 | 17.50 |
| 215 | 09b-DicapTrPr-Fe2P3C3         | -1964.9031384 | 21.12 |
| 216 | 10a-DicapTrPrism-Fe3C2P4      | -1964.9031287 | 21.12 |
| 217 | 10a-DicapTrPrism-Fe2C1P6      | -1964.9031214 | 21.13 |
| 218 | 07b-Tdallcap-Fe2P2C1          | -1964.9030876 | 21.15 |
| 219 | 10b-DicapTrPrism-Fe2P3C4      | -1964.9030852 | 21.15 |
| 220 | 05a-Bisdisph-Fe1C3P1          | -1964.9030840 | 21.15 |
| 221 | 08b-Nido-Fe1P3C4              | -1964.9030318 | 21.19 |
| 222 | 09a-DicapTrPr-Fe2C1P5         | -1964.9029907 | 21.21 |
| 223 | 03a-TrigPyr-FeC2P1            | -1964.9028957 | 21.27 |
| 224 | 07a-Tdallcap-Fe2C4P2          | -1964.9028761 | 21.28 |
| 225 | 10b-DicapTrPrism-Fe3P1C5      | -1964.9028716 | 21.29 |
| 226 | 01a-Cube-FeC1P1               | -1964.9028686 | 21.29 |
| 227 | 01b-Cube-FeP1C1               | -1964.9028610 | 21.29 |
| 228 | 09a-DicapTrPr-Fe3C2P3         | -1964.9027997 | 21.33 |
| 229 | 09b-DicapTrPr-Fe1P1C1         | -1964.9027360 | 21.37 |
| 230 | 11b-DicapOh-Fe3P4C2           | -1964.9027087 | 21.39 |
| 231 | 11a-DicapOh-Fe3C2P4           | -1964.9026929 | 21.40 |
| 232 | 09a-DicapTrPr-Fe3C2P4         | -1964.9026901 | 21.40 |
| 233 | 09b-DicapTrPr-Fe3P3C4         | -1964.9026867 | 21.40 |
| 234 | 07b-Tdallcap-Fe2P4C1          | -1964.9000527 | 23.05 |
| 235 | 07a-Tdallcap-Fe2C4P1          | -1964.9000464 | 23.06 |
| 236 | 07a-Tdallcap-Fe1C1P4_r-22     | -1964.9000358 | 23.07 |
| 237 | 05b-Bisdisph-Fe1P4C1          | -1964.9000271 | 23.07 |
| 238 | 05a-Bisdisph-Fe1C4P1          | -1964.8999963 | 23.09 |
| 239 | 08b-Nido-Fe1P1C6              | -1964.8999959 | 23.09 |
| 240 | 07a-Tdallcap-Fe1C1P4_i-22     | -1964.8996570 | 23.30 |
| 241 | 10a-DicapTrPrism-Fe2C2P3      | -1964.8987402 | 23.88 |
| 242 | 10a-DicapTrPrism-Fe2C1P1      | -1964.8987208 | 23.89 |
| 243 | 08a-Nido-Fe1C2P5              | -1964.8987124 | 23.90 |
| 244 | 10b-DicapTrPrism-Fe2P1C1      | -1964.8987028 | 23.90 |
| 245 | 04b-AntiprTriP-FeP1C1         | -1964.8986966 | 23.91 |
| 246 | 11b-DicapOh-Fe1P1C1           | -1964.8986741 | 23.92 |
| 247 | 07b-Tdallcap-Fe2P1C5          | -1964.8986739 | 23.92 |
| 248 | 05b-Bisdisph-Fe1P4C3          | -1964.8986736 | 23.92 |
| 249 | 08b-Nido-Fe1P2C5              | -1964.8984540 | 24.06 |

|     |                          |               |       |
|-----|--------------------------|---------------|-------|
| 250 | 10a-DicapTrPrism-Fe3C6P1 | -1964.8983456 | 24.13 |
| 251 | 05a-Bisdisph-Fe1C4P2     | -1964.8981901 | 24.22 |
| 252 | 10b-DicapTrPrism-Fe3P5C2 | -1964.8981604 | 24.24 |
| 253 | 10a-DicapTrPrism-Fe2C1P3 | -1964.8981354 | 24.26 |
| 254 | 10a-DicapTrPrism-Fe3C1P5 | -1964.8973176 | 24.77 |
| 255 | 08b-Nido-Fe1P1C1         | -1964.8973129 | 24.77 |
| 256 | 11b-DicapOh-Fe3P1C6      | -1964.8973020 | 24.78 |
| 257 | 09a-DicapTrPr-Fe2C5P2    | -1964.8972975 | 24.78 |
| 258 | 10b-DicapTrPrism-Fe2P1C4 | -1964.8972799 | 24.79 |
| 259 | 09a-DicapTrPr-Fe1C2P1    | -1964.8972788 | 24.80 |
| 260 | 09b-DicapTrPr-Fe1P2C1    | -1964.8972739 | 24.80 |
| 261 | 09b-DicapTrPr-Fe1P1C5    | -1964.8972674 | 24.80 |
| 262 | 05b-Bisdisph-Fe1P1C1     | -1964.8972611 | 24.81 |
| 263 | 02a-Antipr-FeC1P3        | -1964.8972479 | 24.81 |
| 264 | 11a-DicapOh-Fe3C4P1      | -1964.8971971 | 24.85 |
| 265 | 11a-DicapOh-Fe3C1P5      | -1964.8971863 | 24.85 |
| 266 | 08a-Nido-Fe1C3P4         | -1964.8961736 | 25.49 |
| 267 | 11a-DicapOh-Fe1C2P2      | -1964.8937479 | 27.01 |
| 268 | 05b-Bisdisph-Fe2P3C2     | -1964.8937407 | 27.02 |
| 269 | 08b-Nido-Fe2P3C3         | -1964.8936718 | 27.06 |
| 270 | 11b-DicapOh-Fe3P1C5      | -1964.8932853 | 27.30 |
| 271 | 09a-DicapTrPr-Fe1C1P5    | -1964.8929009 | 27.54 |
| 272 | 10a-DicapTrPrism-Fe2C1P4 | -1964.8928940 | 27.55 |
| 273 | 07b-Tdallcap-Fe2P1C1     | -1964.8928565 | 27.57 |
| 274 | 10a-DicapTrPrism-Fe3C5P1 | -1964.8928509 | 27.57 |
| 275 | 05b-Bisdisph-Fe1P5C1     | -1964.8928470 | 27.58 |
| 276 | 08a-Nido-Fe1C1P1         | -1964.8928354 | 27.58 |
| 277 | 02a-Antipr-FeC1P1        | -1964.8928307 | 27.59 |
| 278 | 08a-Nido-Fe2C2P1         | -1964.8928211 | 27.59 |
| 279 | 07a-Tdallcap-Fe2C1P1     | -1964.8928173 | 27.60 |
| 280 | 05a-Bisdisph-Fe1C1P1     | -1964.8928159 | 27.60 |
| 281 | 05b-Bisdisph-Fe2P1C2     | -1964.8928092 | 27.60 |
| 282 | 02b-Antipr-FeP1C3        | -1964.8928081 | 27.60 |
| 283 | 05a-Bisdisph-Fe1C5P1     | -1964.8928070 | 27.60 |
| 284 | 05b-Bisdisph-Fe2P2C5     | -1964.8927961 | 27.61 |
| 285 | 10b-DicapTrPrism-Fe3P5C1 | -1964.8927898 | 27.61 |
| 286 | 11a-DicapOh-Fe3C4P2      | -1964.8927770 | 27.62 |
| 287 | 07b-Tdallcap-Fe1P1C2     | -1964.8921501 | 28.01 |
| 288 | 10b-DicapTrPrism-Fe2P2C3 | -1964.8921391 | 28.02 |
| 289 | 07b-Tdallcap-Fe2P4C2     | -1964.8921276 | 28.03 |
| 290 | 04b-AntiprTriP-FeP1C3    | -1964.8916613 | 28.32 |
| 291 | 01a-Cube-FeC2P2          | -1964.8916606 | 28.32 |

|     |                               |               |       |
|-----|-------------------------------|---------------|-------|
| 292 | 09b-DicapTrPr-Fe3P2C2         | -1964.8916494 | 28.33 |
| 293 | 06a-Bipirhex-Fe1C1P4          | -1964.8916424 | 28.33 |
| 294 | 09b-DicapTrPr-Fe2P2C4         | -1964.8916370 | 28.34 |
| 295 | 01a-Cube-FeC1P4_r-91          | -1964.8916359 | 28.34 |
| 296 | 07b-Tdallcap-Fe1P3C3          | -1964.8916292 | 28.34 |
| 297 | 07b-Tdallcap-Fe1P2C2          | -1964.8916236 | 28.34 |
| 298 | 04b-AntiprTriP-FeP2C3         | -1964.8912388 | 28.59 |
| 299 | 11a-DicapOh-Fe3C5P1           | -1964.8909134 | 28.79 |
| 300 | 09a-DicapTrPr-Fe3C2P5         | -1964.8908867 | 28.81 |
| 301 | 02a-Antipr-FeC1P6             | -1964.8908100 | 28.85 |
| 302 | 10a-DicapTrPrism-Fe2C3P4_r-12 | -1964.8907866 | 28.87 |
| 303 | 09b-DicapTrPr-Fe3P3C3         | -1964.8907849 | 28.87 |
| 304 | 10a-DicapTrPrism-Fe3C4P1      | -1964.8907833 | 28.87 |
| 305 | 08a-Nido-Fe1C2P4              | -1964.8907531 | 28.89 |
| 306 | 10b-DicapTrPrism-Fe2P1C6      | -1964.8907459 | 28.90 |
| 307 | 05b-Bisdisph-Fe1P3C1          | -1964.8907402 | 28.90 |
| 308 | 10a-DicapTrPrism-Fe2C3P4_i-12 | -1964.8907360 | 28.90 |
| 309 | 08b-Nido-Fe1P1C2              | -1964.8906733 | 28.94 |
| 310 | 11a-DicapOh-Fe3C6P1           | -1964.8903988 | 29.11 |
| 311 | 06b-Bipirhex-Fe2P2C3          | -1964.8900162 | 29.35 |
| 312 | 05b-Bisdisph-Fe2P4C1          | -1964.8900126 | 29.36 |
| 313 | 10a-DicapTrPrism-Fe1C1P4      | -1964.8900024 | 29.36 |
| 314 | 09a-DicapTrPr-Fe2C5P1         | -1964.8900015 | 29.36 |
| 315 | 10a-DicapTrPrism-Fe1C2P5      | -1964.8899966 | 29.37 |
| 316 | 02b-Antipr-FeP2C2             | -1964.8899887 | 29.37 |
| 317 | 10a-DicapTrPrism-Fe1C1P3      | -1964.8899837 | 29.37 |
| 318 | 05b-Bisdisph-Fe2P2C4          | -1964.8899830 | 29.37 |
| 319 | 11a-DicapOh-Fe1C1P2           | -1964.8899770 | 29.38 |
| 320 | 10a-DicapTrPrism-Fe1C3P3      | -1964.8899519 | 29.39 |
| 321 | 10b-DicapTrPrism-Fe3P4C3      | -1964.8899150 | 29.42 |
| 322 | 11b-DicapOh-Fe2P1C2           | -1964.8888123 | 30.11 |
| 323 | 10a-DicapTrPrism-Fe3C1P2      | -1964.8882543 | 30.46 |
| 324 | 10b-DicapTrPrism-Fe3P4C1_r-19 | -1964.8882498 | 30.46 |
| 325 | 09b-DicapTrPr-Fe2P5C1_r-28    | -1964.8882300 | 30.47 |
| 326 | 10b-DicapTrPrism-Fe1P2C3      | -1964.8882297 | 30.47 |
| 327 | 08a-Nido-Fe2C3P1              | -1964.8882205 | 30.48 |
| 328 | 05a-Bisdisph-Fe2C2P5          | -1964.8882129 | 30.48 |
| 329 | 10b-DicapTrPrism-Fe1P2C5_r-18 | -1964.8882103 | 30.49 |
| 330 | 02b-Antipr-FeP1C6             | -1964.8881892 | 30.50 |
| 331 | 02b-Antipr-FeP1C1             | -1964.8881872 | 30.50 |
| 332 | 10b-DicapTrPrism-Fe3P1C1_r-34 | -1964.8881836 | 30.50 |
| 333 | 09a-DicapTrPr-Fe2C1P6         | -1964.8881794 | 30.51 |

|     |                               |               |       |
|-----|-------------------------------|---------------|-------|
| 334 | 10b-DicapTrPrism-Fe1P2C5_i-18 | -1964.8881579 | 30.52 |
| 335 | 09a-DicapTrPr-Fe2C3P4         | -1964.8881424 | 30.53 |
| 336 | 08a-Nido-Fe2C1P6              | -1964.8881318 | 30.54 |
| 337 | 09a-DicapTrPr-Fe3C1P6         | -1964.8881268 | 30.54 |
| 338 | 10b-DicapTrPrism-Fe1P1C6      | -1964.8881235 | 30.54 |
| 339 | 09a-DicapTrPr-Fe2C1P4         | -1964.8881119 | 30.55 |
| 340 | 10a-DicapTrPrism-Fe1C1P6      | -1964.8881038 | 30.55 |
| 341 | 01a-Cube-FeC1P4_i-91          | -1964.8880783 | 30.57 |
| 342 | 07a-Tdallcap-Fe2C1P5          | -1964.8880448 | 30.59 |
| 343 | 05a-Bisdisph-Fe1C4P3          | -1964.8880377 | 30.59 |
| 344 | 09b-DicapTrPr-Fe3P1C6_r-31    | -1964.8880126 | 30.61 |
| 345 | 10b-DicapTrPrism-Fe3P4C1_i-19 | -1964.8877796 | 30.76 |
| 346 | 10b-DicapTrPrism-Fe3P1C1_i-34 | -1964.8877742 | 30.76 |
| 347 | 09b-DicapTrPr-Fe2P5C1_i-28    | -1964.8876955 | 30.81 |
| 348 | 09b-DicapTrPr-Fe3P1C6_i-31    | -1964.8871654 | 31.14 |
| 349 | 07a-Tdallcap-Fe2C1P2          | -1964.8870255 | 31.23 |
| 350 | 09a-DicapTrPr-Fe3C1P2         | -1964.8869845 | 31.26 |
| 351 | 11b-DicapOh-Fe3P1C3           | -1964.8869804 | 31.26 |
| 352 | 09b-DicapTrPr-Fe3P2C5         | -1964.8865727 | 31.51 |
| 353 | 09b-DicapTrPr-Fe3P2C1         | -1964.8865562 | 31.52 |
| 354 | 11b-DicapOh-Fe3P6C1           | -1964.8865230 | 31.55 |
| 355 | 09b-DicapTrPr-Fe2P4C1         | -1964.8865191 | 31.55 |
| 356 | 06a-Bipirhex-Fe1C1P1          | -1964.8864991 | 31.56 |
| 357 | 09b-DicapTrPr-Fe2P1C4         | -1964.8864294 | 31.60 |
| 358 | 11b-DicapOh-Fe2P1C4           | -1964.8863672 | 31.64 |
| 359 | 08b-Nido-Fe2P4C1              | -1964.8863375 | 31.66 |
| 360 | 04b-AntiprTriP-FeP1C4         | -1964.8863211 | 31.67 |
| 361 | 08a-Nido-Fe2C1P2              | -1964.8863184 | 31.67 |
| 362 | 08b-Nido-Fe2P3C4              | -1964.8863056 | 31.68 |
| 363 | 11a-DicapOh-Fe2C2P1           | -1964.8861946 | 31.75 |
| 364 | 11b-DicapOh-Fe2P2C1           | -1964.8861938 | 31.75 |
| 365 | 09a-DicapTrPr-Fe1C1P4         | -1964.8861675 | 31.77 |
| 366 | 09a-DicapTrPr-Fe3C3P2         | -1964.8855654 | 32.15 |
| 367 | 10a-DicapTrPrism-Fe2C2P5      | -1964.8850383 | 32.48 |
| 368 | 09b-DicapTrPr-Fe1P1C4         | -1964.8850136 | 32.49 |
| 369 | 07a-Tdallcap-Fe1C4P1          | -1964.8850044 | 32.50 |
| 370 | 08b-Nido-Fe1P2C4              | -1964.8849981 | 32.50 |
| 371 | 05b-Bisdisph-Fe1P1C3_r-47     | -1964.8849860 | 32.51 |
| 372 | 10b-DicapTrPrism-Fe3P2C4      | -1964.8849293 | 32.55 |
| 373 | 10a-DicapTrPrism-Fe3C3P1      | -1964.8849095 | 32.56 |
| 374 | 05b-Bisdisph-Fe2P2C3          | -1964.8848547 | 32.59 |
| 375 | 05b-Bisdisph-Fe1P1C3_i-47     | -1964.8846977 | 32.69 |

|     |                          |               |       |
|-----|--------------------------|---------------|-------|
| 376 | 04b-AntiprTriP-FeP2C4    | -1964.8833545 | 33.53 |
| 377 | 09a-DicapTrPr-Fe3C4P2    | -1964.8831916 | 33.64 |
| 378 | 10b-DicapTrPrism-Fe3P3C1 | -1964.8830952 | 33.70 |
| 379 | 05a-Bisdisph-Fe2C3P1     | -1964.8830942 | 33.70 |
| 380 | 05a-Bisdisph-Fe2C2P3     | -1964.8830681 | 33.71 |
| 381 | 10b-DicapTrPrism-Fe1P1C2 | -1964.8830663 | 33.71 |
| 382 | 08b-Nido-Fe2P2C1         | -1964.8830324 | 33.74 |
| 383 | 02b-Antipr-FeP3C2        | -1964.8830288 | 33.74 |
| 384 | 09a-DicapTrPr-Fe2C4P1    | -1964.8830243 | 33.74 |
| 385 | 06b-Bipirhex-Fe2P1C3     | -1964.8830172 | 33.75 |
| 386 | 11a-DicapOh-Fe3C2P1      | -1964.8826061 | 34.00 |
| 387 | 11a-DicapOh-Fe2C1P2      | -1964.8825913 | 34.01 |
| 388 | 04a-AntiprTrig-FeC3P1    | -1964.8825566 | 34.03 |
| 389 | 07a-Tdallcap-Fe1C3P3     | -1964.8818747 | 34.46 |
| 390 | 03a-TrigPyr-FeC1P5       | -1964.8818582 | 34.47 |
| 391 | 04a-AntiprTrig-FeC1P3    | -1964.8812161 | 34.88 |
| 392 | 07a-Tdallcap-Fe1C1P5     | -1964.8811635 | 34.91 |
| 393 | 09b-DicapTrPr-Fe3P6C1    | -1964.8808382 | 35.11 |
| 394 | 11a-DicapOh-Fe3C3P4      | -1964.8808030 | 35.13 |
| 395 | 08b-Nido-Fe2P4C3         | -1964.8807782 | 35.15 |
| 396 | 08a-Nido-Fe2C3P2         | -1964.8807457 | 35.17 |
| 397 | 11b-DicapOh-Fe3P2C1      | -1964.8803416 | 35.42 |
| 398 | 04b-AntiprTriP-FeP3C1    | -1964.8803076 | 35.45 |
| 399 | 09b-DicapTrPr-Fe2P2C1    | -1964.8799933 | 35.64 |
| 400 | 09a-DicapTrPr-Fe3C5P2    | -1964.8791945 | 36.14 |
| 401 | 07b-Tdallcap-Fe1P1C5     | -1964.8789774 | 36.28 |
| 402 | 07b-Tdallcap-Fe1P3C2     | -1964.8789487 | 36.30 |
| 403 | 01a-Cube-FeC1P2          | -1964.8788972 | 36.33 |
| 404 | 03a-TrigPyr-FeC1P6       | -1964.8788795 | 36.34 |
| 405 | 07b-Tdallcap-Fe1P1C3     | -1964.8788463 | 36.36 |
| 406 | 11b-DicapOh-Fe1P2C2      | -1964.8787109 | 36.45 |
| 407 | 06b-Bipirhex-Fe1P1C4     | -1964.8771503 | 37.43 |
| 408 | 10b-DicapTrPrism-Fe2P3C3 | -1964.8769191 | 37.57 |
| 409 | 11b-DicapOh-Fe3P3C1      | -1964.8769172 | 37.57 |
| 410 | 08a-Nido-Fe1C3P1         | -1964.8768742 | 37.60 |
| 411 | 07b-Tdallcap-Fe2P2C2     | -1964.8768698 | 37.60 |
| 412 | 10b-DicapTrPrism-Fe3P2C5 | -1964.8768587 | 37.61 |
| 413 | 05a-Bisdisph-Fe1C2P1     | -1964.8768194 | 37.63 |
| 414 | 09a-DicapTrPr-Fe3C2P1    | -1964.8760089 | 38.14 |
| 415 | 01b-Cube-FeP1C2          | -1964.8754634 | 38.49 |
| 416 | 09b-DicapTrPr-Fe1P3C2    | -1964.8744712 | 39.11 |
| 417 | 08a-Nido-Fe2C3P3         | -1964.8744302 | 39.13 |

|     |                            |               |       |
|-----|----------------------------|---------------|-------|
| 418 | 09b-DicapTrPr-Fe3P3C2_r-23 | -1964.8739961 | 39.41 |
| 419 | 11b-DicapOh-Fe1P1C2        | -1964.8737982 | 39.53 |
| 420 | 09a-DicapTrPr-Fe1C3P1      | -1964.8735834 | 39.66 |
| 421 | 08b-Nido-Fe2P1C1           | -1964.8735739 | 39.67 |
| 422 | 11a-DicapOh-Fe2C1P3        | -1964.8735620 | 39.68 |
| 423 | 11b-DicapOh-Fe2P1C3        | -1964.8735612 | 39.68 |
| 424 | 08a-Nido-Fe2C1P1           | -1964.8735362 | 39.69 |
| 425 | 09b-DicapTrPr-Fe3P3C2_i-23 | -1964.8735100 | 39.71 |
| 426 | 03a-TrigPyr-FeC2P2         | -1964.8734802 | 39.73 |
| 427 | 11a-DicapOh-Fe3C3P3        | -1964.8734533 | 39.75 |
| 428 | 09a-DicapTrPr-Fe1C3P2      | -1964.8731865 | 39.91 |
| 429 | 10b-DicapTrPrism-Fe3P6C1   | -1964.8730200 | 40.02 |
| 430 | 06b-Bipirhex-Fe2P3C2       | -1964.8728962 | 40.10 |
| 431 | 04a-AntiprTrig-FeC1P4      | -1964.8724475 | 40.38 |
| 432 | 07a-Tdallcap-Fe2C3P2       | -1964.8723851 | 40.42 |
| 433 | 11b-DicapOh-Fe3P3C4        | -1964.8718460 | 40.76 |
| 434 | 05b-Bisdisph-Fe1P2C1       | -1964.8718298 | 40.77 |
| 435 | 06b-Bipirhex-Fe1P1C1       | -1964.8717886 | 40.79 |
| 436 | 09b-DicapTrPr-Fe1P4C1      | -1964.8717143 | 40.84 |
| 437 | 09a-DicapTrPr-Fe1C4P1      | -1964.8717123 | 40.84 |
| 438 | 09a-DicapTrPr-Fe3C1P3_r-55 | -1964.8717049 | 40.84 |
| 439 | 09b-DicapTrPr-Fe2P4C3      | -1964.8711406 | 41.20 |
| 440 | 09b-DicapTrPr-Fe3P5C1      | -1964.8709988 | 41.29 |
| 441 | 05b-Bisdisph-Fe1P2C3       | -1964.8704769 | 41.61 |
| 442 | 07a-Tdallcap-Fe2C2P1       | -1964.8704184 | 41.65 |
| 443 | 05a-Bisdisph-Fe2C1P4       | -1964.8700421 | 41.89 |
| 444 | 11b-DicapOh-Fe2P2C3        | -1964.8697068 | 42.10 |
| 445 | 09a-DicapTrPr-Fe3C3P4      | -1964.8696696 | 42.12 |
| 446 | 09b-DicapTrPr-Fe2P3C1      | -1964.8692536 | 42.38 |
| 447 | 10a-DicapTrPrism-Fe1C3P2   | -1964.8692423 | 42.39 |
| 448 | 10b-DicapTrPrism-Fe3P3C4   | -1964.8692422 | 42.39 |
| 449 | 05b-Bisdisph-Fe2P2C1       | -1964.8692314 | 42.40 |
| 450 | 05a-Bisdisph-Fe2C3P2       | -1964.8692224 | 42.40 |
| 451 | 10a-DicapTrPrism-Fe1C3P1   | -1964.8692215 | 42.40 |
| 452 | 05a-Bisdisph-Fe2C2P6       | -1964.8692098 | 42.41 |
| 453 | 10a-DicapTrPrism-Fe3C3P4   | -1964.8692055 | 42.41 |
| 454 | 05b-Bisdisph-Fe2P2C6       | -1964.8692007 | 42.42 |
| 455 | 08a-Nido-Fe2C2P2           | -1964.8691912 | 42.42 |
| 456 | 02a-Antipr-FeC2P1          | -1964.8691713 | 42.43 |
| 457 | 02a-Antipr-FeC3P1          | -1964.8691705 | 42.43 |
| 458 | 02b-Antipr-FeP3C1          | -1964.8691695 | 42.43 |
| 459 | 10a-DicapTrPrism-Fe3C2P1   | -1964.8691690 | 42.44 |



|     |                            |               |       |
|-----|----------------------------|---------------|-------|
| 460 | 06a-Bipirhex-Fe2C3P1       | -1964.8691558 | 42.44 |
| 461 | 10b-DicapTrPrism-Fe1P3C2   | -1964.8691536 | 42.44 |
| 462 | 07a-Tdallcap-Fe1C2P2       | -1964.8690532 | 42.51 |
| 463 | 06a-Bipirhex-Fe2C2P3_r-42  | -1964.8668719 | 43.88 |
| 464 | 09a-DicapTrPr-Fe3C1P3_i-55 | -1964.8666492 | 44.02 |
| 465 | 03a-TrigPyr-FeC3P2_r-45    | -1964.8666326 | 44.03 |
| 466 | 09b-DicapTrPr-Fe3P1C5      | -1964.8666149 | 44.04 |
| 467 | 03b-TriPyr-FeP3C1          | -1964.8663336 | 44.21 |
| 468 | 08a-Nido-Fe2C1P4           | -1964.8662912 | 44.24 |
| 469 | 09a-DicapTrPr-Fe3C6P1      | -1964.8662153 | 44.29 |
| 470 | 09a-DicapTrPr-Fe3C1P1      | -1964.8661216 | 44.35 |
| 471 | 06a-Bipirhex-Fe2C2P3_i-42  | -1964.8658073 | 44.54 |
| 472 | 08a-Nido-Fe2C4P2           | -1964.8656499 | 44.64 |
| 473 | 10a-DicapTrPrism-Fe1C2P2   | -1964.8655577 | 44.70 |
| 474 | 08b-Nido-Fe2P1C5           | -1964.8655328 | 44.72 |
| 475 | 10b-DicapTrPrism-Fe1P3C1   | -1964.8654450 | 44.77 |
| 476 | 09a-DicapTrPr-Fe2C1P1      | -1964.8654180 | 44.79 |
| 477 | 03a-TrigPyr-FeC3P2_i-45    | -1964.8652472 | 44.90 |
| 478 | 07a-Tdallcap-Fe1C1P3       | -1964.8651995 | 44.93 |
| 479 | 11b-DicapOh-Fe3P4C1        | -1964.8651380 | 44.96 |
| 480 | 09b-DicapTrPr-Fe3P3C1      | -1964.8651284 | 44.97 |
| 481 | 11b-DicapOh-Fe3P2C4_i-14   | -1964.8650480 | 45.02 |
| 482 | 10b-DicapTrPrism-Fe2P2C5   | -1964.8636622 | 45.89 |
| 483 | 10a-DicapTrPrism-Fe3C1P1   | -1964.8636493 | 45.90 |
| 484 | 05a-Bisdisph-Fe1C1P3       | -1964.8636283 | 45.91 |
| 485 | 05a-Bisdisph-Fe2C2P1       | -1964.8630642 | 46.27 |
| 486 | 09a-DicapTrPr-Fe2C3P1      | -1964.8630559 | 46.27 |
| 487 | 02b-Antipr-FeP2C1          | -1964.8630297 | 46.29 |
| 488 | 10b-DicapTrPrism-Fe3P2C1   | -1964.8630280 | 46.29 |
| 489 | 03b-TriPyr-FeP2C3          | -1964.8628995 | 46.37 |
| 490 | 11b-DicapOh-Fe3P5C1        | -1964.8627791 | 46.44 |
| 491 | 11a-DicapOh-Fe2C1P4        | -1964.8627068 | 46.49 |
| 492 | 03a-TrigPyr-FeC1P4         | -1964.8626949 | 46.50 |
| 493 | 04a-AntiprTrig-FeC2P2      | -1964.8626948 | 46.50 |
| 494 | 04a-AntiprTrig-FeC2P3      | -1964.8625266 | 46.60 |
| 495 | 11a-DicapOh-Fe3C5P2        | -1964.8624405 | 46.66 |
| 496 | 05a-Bisdisph-Fe2C2P2       | -1964.8623544 | 46.71 |
| 497 | 11a-DicapOh-Fe3C1P1        | -1964.8613843 | 47.32 |
| 498 | 06b-Bipirhex-Fe2P2C4       | -1964.8609837 | 47.57 |
| 499 | 07a-Tdallcap-Fe1C3P2       | -1964.8603475 | 47.97 |
| 500 | 09a-DicapTrPr-Fe1C2P2      | -1964.8599160 | 48.24 |
| 501 | 09a-DicapTrPr-Fe2C4P3      | -1964.8595870 | 48.45 |

|     |                          |               |       |
|-----|--------------------------|---------------|-------|
| 502 | 06a-Bipirhex-Fe2C3P2     | -1964.8593599 | 48.59 |
| 503 | 08a-Nido-Fe2C1P3         | -1964.8587139 | 49.00 |
| 504 | 10a-DicapTrPrism-Fe3C2P5 | -1964.8586647 | 49.03 |
| 505 | 10a-DicapTrPrism-Fe2C3P3 | -1964.8586395 | 49.04 |
| 506 | 07a-Tdallcap-Fe2C2P2     | -1964.8586345 | 49.05 |
| 507 | 07b-Tdallcap-Fe1P4C1     | -1964.8585020 | 49.13 |
| 508 | 04a-AntiprTrig-FeC2P4    | -1964.8577751 | 49.58 |
| 509 | 11a-DicapOh-Fe1C1P1      | -1964.8571616 | 49.97 |
| 510 | 07b-Tdallcap-Fe2P1C2     | -1964.8570222 | 50.06 |
| 511 | 03b-TriPyr-FeP1C4        | -1964.8568615 | 50.16 |
| 512 | 11b-DicapOh-Fe3P2C2      | -1964.8567203 | 50.25 |
| 513 | 09b-DicapTrPr-Fe3P4C1    | -1964.8566683 | 50.28 |
| 514 | 09b-DicapTrPr-Fe3P4C3    | -1964.8563154 | 50.50 |
| 515 | 09a-DicapTrPr-Fe3C1P5    | -1964.8561876 | 50.58 |
| 516 | 06a-Bipirhex-Fe2C1P2     | -1964.8557116 | 50.88 |
| 517 | 09a-DicapTrPr-Fe3C3P1    | -1964.8551918 | 51.21 |
| 518 | 05b-Bisdisph-Fe2P1C1     | -1964.8549634 | 51.35 |
| 519 | 08b-Nido-Fe2P1C6         | -1964.8548521 | 51.42 |
| 520 | 08b-Nido-Fe2P1C4         | -1964.8535924 | 52.21 |
| 521 | 04b-AntiprTriP-FeP4C1    | -1964.8530944 | 52.52 |
| 522 | 07a-Tdallcap-Fe1C2P1     | -1964.8528766 | 52.66 |
| 523 | 11a-DicapOh-Fe2C1P1      | -1964.8519265 | 53.26 |
| 524 | 09b-DicapTrPr-Fe2P5C2    | -1964.8514105 | 53.58 |
| 525 | 08a-Nido-Fe2C4P3         | -1964.8512881 | 53.66 |
| 526 | 08b-Nido-Fe2P3C2         | -1964.8512788 | 53.66 |
| 527 | 07b-Tdallcap-Fe1P1C6     | -1964.8506360 | 54.06 |
| 528 | 07a-Tdallcap-Fe1C1P6     | -1964.8506019 | 54.09 |
| 529 | 11b-DicapOh-Fe2P1C1      | -1964.8504240 | 54.20 |
| 530 | 07b-Tdallcap-Fe1P3C1     | -1964.8501264 | 54.38 |
| 531 | 01b-Cube-FeP2C2          | -1964.8501219 | 54.39 |
| 532 | 09a-DicapTrPr-Fe3C5P1    | -1964.8501121 | 54.39 |
| 533 | 04b-AntiprTriP-FeP3C3    | -1964.8501114 | 54.39 |
| 534 | 04a-AntiprTrig-FeC4P1    | -1964.8500353 | 54.44 |
| 535 | 09a-DicapTrPr-Fe1C1P1    | -1964.8494114 | 54.83 |
| 536 | 11a-DicapOh-Fe1C1P4      | -1964.8494106 | 54.83 |
| 537 | 06a-Bipirhex-Fe2C2P2     | -1964.8487902 | 55.22 |
| 538 | 10a-DicapTrPrism-Fe1C2P4 | -1964.8486554 | 55.31 |
| 539 | 04a-AntiprTrig-FeC2P5    | -1964.8486449 | 55.31 |
| 540 | 10b-DicapTrPrism-Fe3P4C2 | -1964.8481602 | 55.62 |
| 541 | 05b-Bisdisph-Fe2P3C1     | -1964.8481600 | 55.62 |
| 542 | 02a-Antipr-FeC3P2        | -1964.8481340 | 55.63 |
| 543 | 10a-DicapTrPrism-Fe1C1P2 | -1964.8481227 | 55.64 |

|     |                            |               |       |
|-----|----------------------------|---------------|-------|
| 544 | 11b-DicapOh-Fe1P1C4        | -1964.8478912 | 55.79 |
| 545 | 09b-DicapTrPr-Fe3P1C1      | -1964.8478649 | 55.80 |
| 546 | 11a-DicapOh-Fe1C1P5        | -1964.8467198 | 56.52 |
| 547 | 09a-DicapTrPr-Fe2C1P3      | -1964.8463342 | 56.76 |
| 548 | 03b-TriPyr-FeP2C2          | -1964.8462280 | 56.83 |
| 549 | 04a-AntiprTrig-FeC1P2      | -1964.8458204 | 57.09 |
| 550 | 04b-AntiprTriP-FeP2C2      | -1964.8455209 | 57.27 |
| 551 | 09b-DicapTrPr-Fe1P3C1      | -1964.8454859 | 57.30 |
| 552 | 06b-Bipirhex-Fe2P3C1       | -1964.8454849 | 57.30 |
| 553 | 08b-Nido-Fe1P2C3           | -1964.8453151 | 57.40 |
| 554 | 09b-DicapTrPr-Fe3P1C3      | -1964.8451797 | 57.49 |
| 555 | 04a-AntiprTrig-FeC1P1_i-16 | -1964.8446614 | 57.81 |
| 556 | 04a-AntiprTrig-FeC1P1_r-16 | -1964.8445242 | 57.90 |
| 557 | 10a-DicapTrPrism-Fe3C4P2   | -1964.8441148 | 58.16 |
| 558 | 11a-DicapOh-Fe3C2P2        | -1964.8435585 | 58.51 |
| 559 | 11b-DicapOh-Fe3P1C2        | -1964.8429475 | 58.89 |
| 560 | 03b-TriPyr-FeP2C1          | -1964.8412938 | 59.93 |
| 561 | 09b-DicapTrPr-Fe2P1C1      | -1964.8412450 | 59.96 |
| 562 | 11b-DicapOh-Fe3P3C2        | -1964.8408719 | 60.19 |
| 563 | 03a-TrigPyr-FeC4P1         | -1964.8391562 | 61.27 |
| 564 | 11b-DicapOh-Fe3P1C1        | -1964.8391404 | 61.28 |
| 565 | 08b-Nido-Fe2P3C1           | -1964.8390431 | 61.34 |
| 566 | 03a-TrigPyr-FeC1P1         | -1964.8382116 | 61.86 |
| 567 | 11b-DicapOh-Fe1P2C1        | -1964.8380416 | 61.97 |
| 568 | 11a-DicapOh-Fe3C1P2        | -1964.8358349 | 63.35 |
| 569 | 11a-DicapOh-Fe3C1P6        | -1964.8339576 | 64.53 |
| 570 | 03b-TriPyr-FeP3C2          | -1964.8331372 | 65.05 |
| 571 | 04a-AntiprTrig-FeC3P3      | -1964.8324415 | 65.48 |
| 572 | 11a-DicapOh-Fe1C2P1        | -1964.8321500 | 65.67 |
| 573 | 03a-TrigPyr-FeC3P1         | -1964.8312347 | 66.24 |
| 574 | 09a-DicapTrPr-Fe2C2P5      | -1964.8305836 | 66.65 |
| 575 | 08b-Nido-Fe2P2C2           | -1964.8291123 | 67.57 |
| 576 | 06a-Bipirhex-Fe2C1P3_r-139 | -1964.8290938 | 67.58 |
| 577 | 03a-TrigPyr-FeC1P2         | -1964.8267723 | 69.04 |
| 578 | 03b-TriPyr-FeP1C2          | -1964.8249426 | 70.19 |
| 579 | 06a-Bipirhex-Fe2C1P4       | -1964.8216563 | 72.25 |
| 580 | 06b-Bipirhex-Fe2P2C2       | -1964.8216500 | 72.25 |
| 581 | 06b-Bipirhex-Fe2P1C4       | -1964.8215993 | 72.29 |
| 582 | 07b-Tdallcap-Fe1P2C1       | -1964.8196915 | 73.48 |
| 583 | 09b-DicapTrPr-Fe2P3C4      | -1964.8193065 | 73.72 |
| 584 | 09b-DicapTrPr-Fe2P2C5      | -1964.8183572 | 74.32 |
| 585 | 07a-Tdallcap-Fe1C3P1       | -1964.8141160 | 76.98 |

|     |                            |               |       |
|-----|----------------------------|---------------|-------|
| 586 | 09a-DicapTrPr-Fe1C2P3      | -1964.8068823 | 81.52 |
| 587 | 06a-Bipirhex-Fe2C1P3_i-139 | -1964.8051880 | 82.58 |
| 588 | 09b-DicapTrPr-Fe2P1C6      | -1964.8039610 | 83.35 |
| 589 | 03b-TriPyr-FeP1C3          | -1964.7980708 | 87.05 |
| 590 | 03a-TrigPyr-FeC1P3         | -1964.7980675 | 87.05 |
| 591 | 03b-TriPyr-FeP4C1          | -1964.7969920 | 87.73 |
| 592 | 11a-DicapOh-Fe1C2P3        | -1964.7917901 | 90.99 |
| 593 | 11a-DicapOh-Fe1C1P3        | -1964.7917332 | 91.03 |

Table S2A. Initial CpFeCHPHHB<sub>6</sub>H<sub>6</sub> structures, 439 in all.

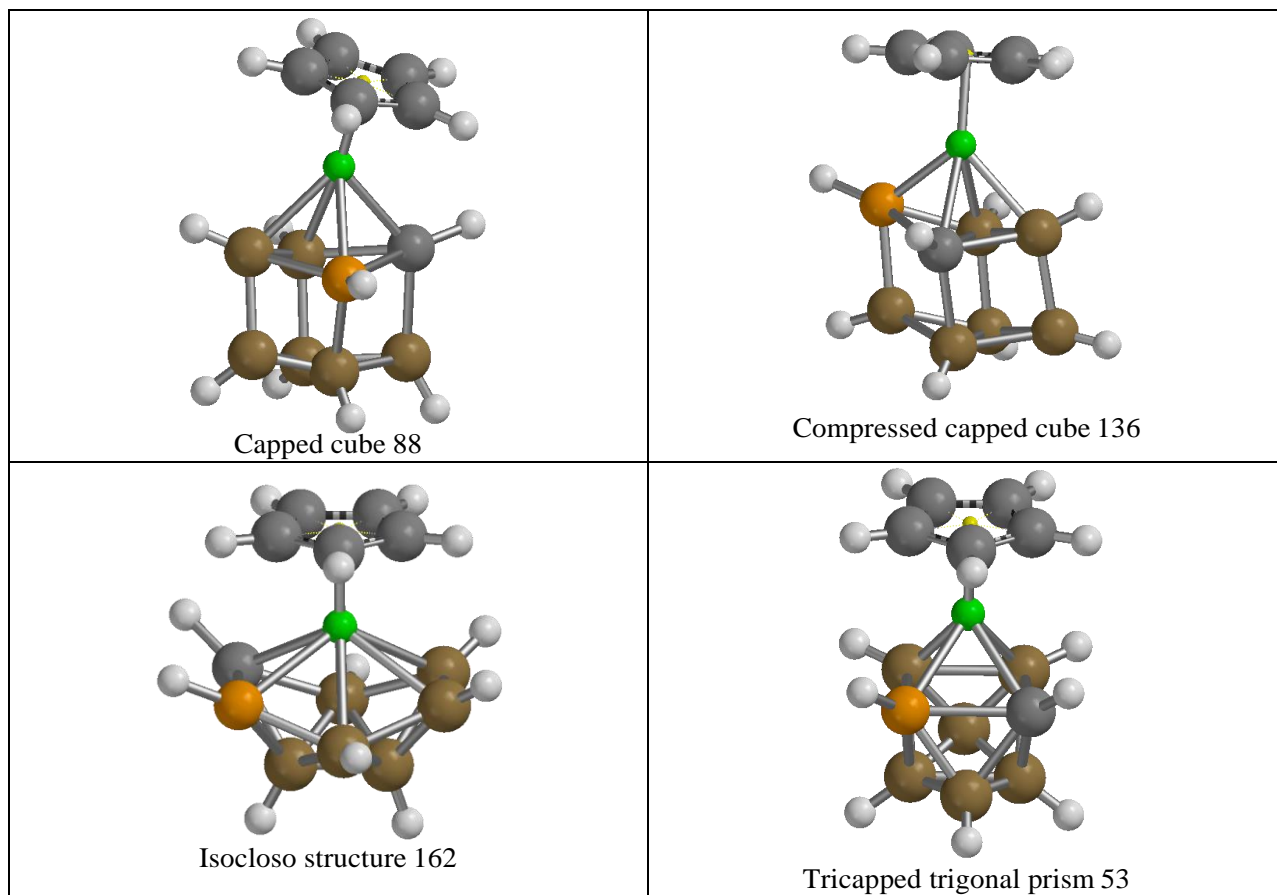

Table S2B. Distance table for the lowest-lying CpFeCHPCH<sub>3</sub>B<sub>6</sub>H<sub>6</sub> structures after M06L/6-311G(d,p) optimization. Included are the ZPcorrected E (a.u.), relative energy (kcal/mol), HOMO/LUMO gaps (eV) and symmetry.

| 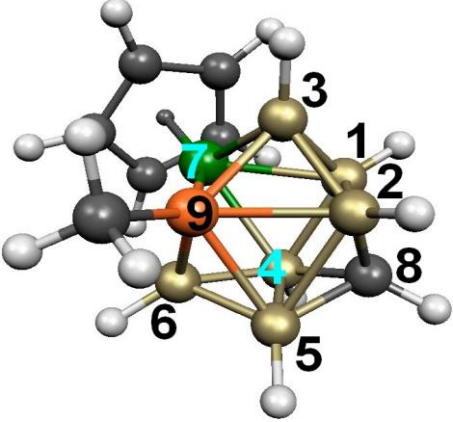 <p>1. -2029.6826789 0.0<br/>C<sub>s</sub> H/L 2.00</p>    | <table border="1"> <thead> <tr> <th></th> <th>1</th> <th>2</th> <th>3</th> <th>4</th> <th>5</th> </tr> </thead> <tbody> <tr><td>1 B</td><td>0.000000</td><td></td><td></td><td></td><td></td></tr> <tr><td>2 B</td><td>1.789398</td><td>0.000000</td><td></td><td></td><td></td></tr> <tr><td>3 B</td><td>1.709540</td><td>1.751413</td><td>0.000000</td><td></td><td></td></tr> <tr><td>4 B</td><td>1.852223</td><td>2.658248</td><td>2.942765</td><td>0.000000</td><td></td></tr> <tr><td>5 B</td><td>2.658548</td><td>2.085327</td><td>3.086499</td><td>1.790875</td><td>0.000000</td></tr> <tr><td>6 B</td><td>2.941241</td><td>3.084238</td><td>3.095136</td><td>1.709524</td><td>1.750089</td></tr> <tr><td>7 Fe</td><td>2.137782</td><td>3.076109</td><td>2.042195</td><td>2.137952</td><td>3.076723</td></tr> <tr><td>8 C</td><td>1.627812</td><td>1.584448</td><td>2.746865</td><td>1.627013</td><td>1.583901</td></tr> <tr><td>9 P</td><td>2.748034</td><td>2.114301</td><td>1.904321</td><td>2.749089</td><td>2.114922</td></tr> <tr> <th></th> <th>6</th> <th>7</th> <th>8</th> <th>9</th> <th></th> </tr> <tr><td>6 B</td><td>0.000000</td><td></td><td></td><td></td><td></td></tr> <tr><td>7 Fe</td><td>2.042054</td><td>0.000000</td><td></td><td></td><td></td></tr> <tr><td>8 C</td><td>2.744374</td><td>3.112654</td><td>0.000000</td><td></td><td></td></tr> <tr><td>9 P</td><td>1.903810</td><td>2.233154</td><td>2.854360</td><td>0.000000</td><td></td></tr> </tbody> </table> |          | 1        | 2        | 3        | 4 | 5 | 1 B | 0.000000 |  |  |  |  | 2 B | 1.789398 | 0.000000 |  |  |  | 3 B | 1.709540 | 1.751413 | 0.000000 |  |  | 4 B  | 1.852223 | 2.658248 | 2.942765 | 0.000000 |  | 5 B | 2.658548 | 2.085327 | 3.086499 | 1.790875 | 0.000000 | 6 B | 2.941241 | 3.084238 | 3.095136 | 1.709524 | 1.750089 | 7 Fe | 2.137782 | 3.076109 | 2.042195 | 2.137952 | 3.076723 | 8 C | 1.627812 | 1.584448 | 2.746865 | 1.627013 | 1.583901 | 9 P | 2.748034 | 2.114301 | 1.904321 | 2.749089 | 2.114922 |  | 6 | 7 | 8 | 9 |  | 6 B | 0.000000 |  |  |  |  | 7 Fe | 2.042054 | 0.000000 |  |  |  | 8 C | 2.744374 | 3.112654 | 0.000000 |  |  | 9 P | 1.903810 | 2.233154 | 2.854360 | 0.000000 |  |
|---------------------------------------------------------------------------------------------------------------------------------------------|-------------------------------------------------------------------------------------------------------------------------------------------------------------------------------------------------------------------------------------------------------------------------------------------------------------------------------------------------------------------------------------------------------------------------------------------------------------------------------------------------------------------------------------------------------------------------------------------------------------------------------------------------------------------------------------------------------------------------------------------------------------------------------------------------------------------------------------------------------------------------------------------------------------------------------------------------------------------------------------------------------------------------------------------------------------------------------------------------------------------------------------------------------------------------------------------------------------------------------------------------------------------------------------------------------------------------------------------------------------------------------------------------------------------------------------------------------------------------------------------------------|----------|----------|----------|----------|---|---|-----|----------|--|--|--|--|-----|----------|----------|--|--|--|-----|----------|----------|----------|--|--|------|----------|----------|----------|----------|--|-----|----------|----------|----------|----------|----------|-----|----------|----------|----------|----------|----------|------|----------|----------|----------|----------|----------|-----|----------|----------|----------|----------|----------|-----|----------|----------|----------|----------|----------|--|---|---|---|---|--|-----|----------|--|--|--|--|------|----------|----------|--|--|--|-----|----------|----------|----------|--|--|-----|----------|----------|----------|----------|--|
|                                                                                                                                             | 1                                                                                                                                                                                                                                                                                                                                                                                                                                                                                                                                                                                                                                                                                                                                                                                                                                                                                                                                                                                                                                                                                                                                                                                                                                                                                                                                                                                                                                                                                                     | 2        | 3        | 4        | 5        |   |   |     |          |  |  |  |  |     |          |          |  |  |  |     |          |          |          |  |  |      |          |          |          |          |  |     |          |          |          |          |          |     |          |          |          |          |          |      |          |          |          |          |          |     |          |          |          |          |          |     |          |          |          |          |          |  |   |   |   |   |  |     |          |  |  |  |  |      |          |          |  |  |  |     |          |          |          |  |  |     |          |          |          |          |  |
| 1 B                                                                                                                                         | 0.000000                                                                                                                                                                                                                                                                                                                                                                                                                                                                                                                                                                                                                                                                                                                                                                                                                                                                                                                                                                                                                                                                                                                                                                                                                                                                                                                                                                                                                                                                                              |          |          |          |          |   |   |     |          |  |  |  |  |     |          |          |  |  |  |     |          |          |          |  |  |      |          |          |          |          |  |     |          |          |          |          |          |     |          |          |          |          |          |      |          |          |          |          |          |     |          |          |          |          |          |     |          |          |          |          |          |  |   |   |   |   |  |     |          |  |  |  |  |      |          |          |  |  |  |     |          |          |          |  |  |     |          |          |          |          |  |
| 2 B                                                                                                                                         | 1.789398                                                                                                                                                                                                                                                                                                                                                                                                                                                                                                                                                                                                                                                                                                                                                                                                                                                                                                                                                                                                                                                                                                                                                                                                                                                                                                                                                                                                                                                                                              | 0.000000 |          |          |          |   |   |     |          |  |  |  |  |     |          |          |  |  |  |     |          |          |          |  |  |      |          |          |          |          |  |     |          |          |          |          |          |     |          |          |          |          |          |      |          |          |          |          |          |     |          |          |          |          |          |     |          |          |          |          |          |  |   |   |   |   |  |     |          |  |  |  |  |      |          |          |  |  |  |     |          |          |          |  |  |     |          |          |          |          |  |
| 3 B                                                                                                                                         | 1.709540                                                                                                                                                                                                                                                                                                                                                                                                                                                                                                                                                                                                                                                                                                                                                                                                                                                                                                                                                                                                                                                                                                                                                                                                                                                                                                                                                                                                                                                                                              | 1.751413 | 0.000000 |          |          |   |   |     |          |  |  |  |  |     |          |          |  |  |  |     |          |          |          |  |  |      |          |          |          |          |  |     |          |          |          |          |          |     |          |          |          |          |          |      |          |          |          |          |          |     |          |          |          |          |          |     |          |          |          |          |          |  |   |   |   |   |  |     |          |  |  |  |  |      |          |          |  |  |  |     |          |          |          |  |  |     |          |          |          |          |  |
| 4 B                                                                                                                                         | 1.852223                                                                                                                                                                                                                                                                                                                                                                                                                                                                                                                                                                                                                                                                                                                                                                                                                                                                                                                                                                                                                                                                                                                                                                                                                                                                                                                                                                                                                                                                                              | 2.658248 | 2.942765 | 0.000000 |          |   |   |     |          |  |  |  |  |     |          |          |  |  |  |     |          |          |          |  |  |      |          |          |          |          |  |     |          |          |          |          |          |     |          |          |          |          |          |      |          |          |          |          |          |     |          |          |          |          |          |     |          |          |          |          |          |  |   |   |   |   |  |     |          |  |  |  |  |      |          |          |  |  |  |     |          |          |          |  |  |     |          |          |          |          |  |
| 5 B                                                                                                                                         | 2.658548                                                                                                                                                                                                                                                                                                                                                                                                                                                                                                                                                                                                                                                                                                                                                                                                                                                                                                                                                                                                                                                                                                                                                                                                                                                                                                                                                                                                                                                                                              | 2.085327 | 3.086499 | 1.790875 | 0.000000 |   |   |     |          |  |  |  |  |     |          |          |  |  |  |     |          |          |          |  |  |      |          |          |          |          |  |     |          |          |          |          |          |     |          |          |          |          |          |      |          |          |          |          |          |     |          |          |          |          |          |     |          |          |          |          |          |  |   |   |   |   |  |     |          |  |  |  |  |      |          |          |  |  |  |     |          |          |          |  |  |     |          |          |          |          |  |
| 6 B                                                                                                                                         | 2.941241                                                                                                                                                                                                                                                                                                                                                                                                                                                                                                                                                                                                                                                                                                                                                                                                                                                                                                                                                                                                                                                                                                                                                                                                                                                                                                                                                                                                                                                                                              | 3.084238 | 3.095136 | 1.709524 | 1.750089 |   |   |     |          |  |  |  |  |     |          |          |  |  |  |     |          |          |          |  |  |      |          |          |          |          |  |     |          |          |          |          |          |     |          |          |          |          |          |      |          |          |          |          |          |     |          |          |          |          |          |     |          |          |          |          |          |  |   |   |   |   |  |     |          |  |  |  |  |      |          |          |  |  |  |     |          |          |          |  |  |     |          |          |          |          |  |
| 7 Fe                                                                                                                                        | 2.137782                                                                                                                                                                                                                                                                                                                                                                                                                                                                                                                                                                                                                                                                                                                                                                                                                                                                                                                                                                                                                                                                                                                                                                                                                                                                                                                                                                                                                                                                                              | 3.076109 | 2.042195 | 2.137952 | 3.076723 |   |   |     |          |  |  |  |  |     |          |          |  |  |  |     |          |          |          |  |  |      |          |          |          |          |  |     |          |          |          |          |          |     |          |          |          |          |          |      |          |          |          |          |          |     |          |          |          |          |          |     |          |          |          |          |          |  |   |   |   |   |  |     |          |  |  |  |  |      |          |          |  |  |  |     |          |          |          |  |  |     |          |          |          |          |  |
| 8 C                                                                                                                                         | 1.627812                                                                                                                                                                                                                                                                                                                                                                                                                                                                                                                                                                                                                                                                                                                                                                                                                                                                                                                                                                                                                                                                                                                                                                                                                                                                                                                                                                                                                                                                                              | 1.584448 | 2.746865 | 1.627013 | 1.583901 |   |   |     |          |  |  |  |  |     |          |          |  |  |  |     |          |          |          |  |  |      |          |          |          |          |  |     |          |          |          |          |          |     |          |          |          |          |          |      |          |          |          |          |          |     |          |          |          |          |          |     |          |          |          |          |          |  |   |   |   |   |  |     |          |  |  |  |  |      |          |          |  |  |  |     |          |          |          |  |  |     |          |          |          |          |  |
| 9 P                                                                                                                                         | 2.748034                                                                                                                                                                                                                                                                                                                                                                                                                                                                                                                                                                                                                                                                                                                                                                                                                                                                                                                                                                                                                                                                                                                                                                                                                                                                                                                                                                                                                                                                                              | 2.114301 | 1.904321 | 2.749089 | 2.114922 |   |   |     |          |  |  |  |  |     |          |          |  |  |  |     |          |          |          |  |  |      |          |          |          |          |  |     |          |          |          |          |          |     |          |          |          |          |          |      |          |          |          |          |          |     |          |          |          |          |          |     |          |          |          |          |          |  |   |   |   |   |  |     |          |  |  |  |  |      |          |          |  |  |  |     |          |          |          |  |  |     |          |          |          |          |  |
|                                                                                                                                             | 6                                                                                                                                                                                                                                                                                                                                                                                                                                                                                                                                                                                                                                                                                                                                                                                                                                                                                                                                                                                                                                                                                                                                                                                                                                                                                                                                                                                                                                                                                                     | 7        | 8        | 9        |          |   |   |     |          |  |  |  |  |     |          |          |  |  |  |     |          |          |          |  |  |      |          |          |          |          |  |     |          |          |          |          |          |     |          |          |          |          |          |      |          |          |          |          |          |     |          |          |          |          |          |     |          |          |          |          |          |  |   |   |   |   |  |     |          |  |  |  |  |      |          |          |  |  |  |     |          |          |          |  |  |     |          |          |          |          |  |
| 6 B                                                                                                                                         | 0.000000                                                                                                                                                                                                                                                                                                                                                                                                                                                                                                                                                                                                                                                                                                                                                                                                                                                                                                                                                                                                                                                                                                                                                                                                                                                                                                                                                                                                                                                                                              |          |          |          |          |   |   |     |          |  |  |  |  |     |          |          |  |  |  |     |          |          |          |  |  |      |          |          |          |          |  |     |          |          |          |          |          |     |          |          |          |          |          |      |          |          |          |          |          |     |          |          |          |          |          |     |          |          |          |          |          |  |   |   |   |   |  |     |          |  |  |  |  |      |          |          |  |  |  |     |          |          |          |  |  |     |          |          |          |          |  |
| 7 Fe                                                                                                                                        | 2.042054                                                                                                                                                                                                                                                                                                                                                                                                                                                                                                                                                                                                                                                                                                                                                                                                                                                                                                                                                                                                                                                                                                                                                                                                                                                                                                                                                                                                                                                                                              | 0.000000 |          |          |          |   |   |     |          |  |  |  |  |     |          |          |  |  |  |     |          |          |          |  |  |      |          |          |          |          |  |     |          |          |          |          |          |     |          |          |          |          |          |      |          |          |          |          |          |     |          |          |          |          |          |     |          |          |          |          |          |  |   |   |   |   |  |     |          |  |  |  |  |      |          |          |  |  |  |     |          |          |          |  |  |     |          |          |          |          |  |
| 8 C                                                                                                                                         | 2.744374                                                                                                                                                                                                                                                                                                                                                                                                                                                                                                                                                                                                                                                                                                                                                                                                                                                                                                                                                                                                                                                                                                                                                                                                                                                                                                                                                                                                                                                                                              | 3.112654 | 0.000000 |          |          |   |   |     |          |  |  |  |  |     |          |          |  |  |  |     |          |          |          |  |  |      |          |          |          |          |  |     |          |          |          |          |          |     |          |          |          |          |          |      |          |          |          |          |          |     |          |          |          |          |          |     |          |          |          |          |          |  |   |   |   |   |  |     |          |  |  |  |  |      |          |          |  |  |  |     |          |          |          |  |  |     |          |          |          |          |  |
| 9 P                                                                                                                                         | 1.903810                                                                                                                                                                                                                                                                                                                                                                                                                                                                                                                                                                                                                                                                                                                                                                                                                                                                                                                                                                                                                                                                                                                                                                                                                                                                                                                                                                                                                                                                                              | 2.233154 | 2.854360 | 0.000000 |          |   |   |     |          |  |  |  |  |     |          |          |  |  |  |     |          |          |          |  |  |      |          |          |          |          |  |     |          |          |          |          |          |     |          |          |          |          |          |      |          |          |          |          |          |     |          |          |          |          |          |     |          |          |          |          |          |  |   |   |   |   |  |     |          |  |  |  |  |      |          |          |  |  |  |     |          |          |          |  |  |     |          |          |          |          |  |
|  <p>2. -2029.6802632 +1.5<br/>C<sub>1</sub> H/L 2.19</p>  | <table border="1"> <thead> <tr> <th></th> <th>1</th> <th>2</th> <th>3</th> <th>4</th> <th>5</th> </tr> </thead> <tbody> <tr><td>1 B</td><td>0.000000</td><td></td><td></td><td></td><td></td></tr> <tr><td>2 B</td><td>2.922598</td><td>0.000000</td><td></td><td></td><td></td></tr> <tr><td>3 B</td><td>1.897784</td><td>1.810839</td><td>0.000000</td><td></td><td></td></tr> <tr><td>4 B</td><td>1.883193</td><td>1.700262</td><td>1.855757</td><td>0.000000</td><td></td></tr> <tr><td>5 B</td><td>2.630643</td><td>1.776309</td><td>2.760947</td><td>1.770228</td><td>0.000000</td></tr> <tr><td>6 C</td><td>1.595784</td><td>2.735441</td><td>2.762254</td><td>1.617470</td><td>1.564692</td></tr> <tr><td>7 Fe</td><td>2.142961</td><td>3.212733</td><td>3.019838</td><td>2.997259</td><td>2.208604</td></tr> <tr><td>8 B</td><td>1.697455</td><td>3.006245</td><td>1.762678</td><td>2.919255</td><td>3.144044</td></tr> <tr><td>9 P</td><td>2.775461</td><td>1.862898</td><td>1.996435</td><td>2.786296</td><td>2.242177</td></tr> <tr> <th></th> <th>6</th> <th>7</th> <th>8</th> <th>9</th> <th></th> </tr> <tr><td>6 C</td><td>0.000000</td><td></td><td></td><td></td><td></td></tr> <tr><td>7 Fe</td><td>1.946570</td><td>0.000000</td><td></td><td></td><td></td></tr> <tr><td>8 B</td><td>2.813053</td><td>2.034301</td><td>0.000000</td><td></td><td></td></tr> <tr><td>9 P</td><td>2.955650</td><td>2.176327</td><td>1.915518</td><td>0.000000</td><td></td></tr> </tbody> </table> |          | 1        | 2        | 3        | 4 | 5 | 1 B | 0.000000 |  |  |  |  | 2 B | 2.922598 | 0.000000 |  |  |  | 3 B | 1.897784 | 1.810839 | 0.000000 |  |  | 4 B  | 1.883193 | 1.700262 | 1.855757 | 0.000000 |  | 5 B | 2.630643 | 1.776309 | 2.760947 | 1.770228 | 0.000000 | 6 C | 1.595784 | 2.735441 | 2.762254 | 1.617470 | 1.564692 | 7 Fe | 2.142961 | 3.212733 | 3.019838 | 2.997259 | 2.208604 | 8 B | 1.697455 | 3.006245 | 1.762678 | 2.919255 | 3.144044 | 9 P | 2.775461 | 1.862898 | 1.996435 | 2.786296 | 2.242177 |  | 6 | 7 | 8 | 9 |  | 6 C | 0.000000 |  |  |  |  | 7 Fe | 1.946570 | 0.000000 |  |  |  | 8 B | 2.813053 | 2.034301 | 0.000000 |  |  | 9 P | 2.955650 | 2.176327 | 1.915518 | 0.000000 |  |
|                                                                                                                                             | 1                                                                                                                                                                                                                                                                                                                                                                                                                                                                                                                                                                                                                                                                                                                                                                                                                                                                                                                                                                                                                                                                                                                                                                                                                                                                                                                                                                                                                                                                                                     | 2        | 3        | 4        | 5        |   |   |     |          |  |  |  |  |     |          |          |  |  |  |     |          |          |          |  |  |      |          |          |          |          |  |     |          |          |          |          |          |     |          |          |          |          |          |      |          |          |          |          |          |     |          |          |          |          |          |     |          |          |          |          |          |  |   |   |   |   |  |     |          |  |  |  |  |      |          |          |  |  |  |     |          |          |          |  |  |     |          |          |          |          |  |
| 1 B                                                                                                                                         | 0.000000                                                                                                                                                                                                                                                                                                                                                                                                                                                                                                                                                                                                                                                                                                                                                                                                                                                                                                                                                                                                                                                                                                                                                                                                                                                                                                                                                                                                                                                                                              |          |          |          |          |   |   |     |          |  |  |  |  |     |          |          |  |  |  |     |          |          |          |  |  |      |          |          |          |          |  |     |          |          |          |          |          |     |          |          |          |          |          |      |          |          |          |          |          |     |          |          |          |          |          |     |          |          |          |          |          |  |   |   |   |   |  |     |          |  |  |  |  |      |          |          |  |  |  |     |          |          |          |  |  |     |          |          |          |          |  |
| 2 B                                                                                                                                         | 2.922598                                                                                                                                                                                                                                                                                                                                                                                                                                                                                                                                                                                                                                                                                                                                                                                                                                                                                                                                                                                                                                                                                                                                                                                                                                                                                                                                                                                                                                                                                              | 0.000000 |          |          |          |   |   |     |          |  |  |  |  |     |          |          |  |  |  |     |          |          |          |  |  |      |          |          |          |          |  |     |          |          |          |          |          |     |          |          |          |          |          |      |          |          |          |          |          |     |          |          |          |          |          |     |          |          |          |          |          |  |   |   |   |   |  |     |          |  |  |  |  |      |          |          |  |  |  |     |          |          |          |  |  |     |          |          |          |          |  |
| 3 B                                                                                                                                         | 1.897784                                                                                                                                                                                                                                                                                                                                                                                                                                                                                                                                                                                                                                                                                                                                                                                                                                                                                                                                                                                                                                                                                                                                                                                                                                                                                                                                                                                                                                                                                              | 1.810839 | 0.000000 |          |          |   |   |     |          |  |  |  |  |     |          |          |  |  |  |     |          |          |          |  |  |      |          |          |          |          |  |     |          |          |          |          |          |     |          |          |          |          |          |      |          |          |          |          |          |     |          |          |          |          |          |     |          |          |          |          |          |  |   |   |   |   |  |     |          |  |  |  |  |      |          |          |  |  |  |     |          |          |          |  |  |     |          |          |          |          |  |
| 4 B                                                                                                                                         | 1.883193                                                                                                                                                                                                                                                                                                                                                                                                                                                                                                                                                                                                                                                                                                                                                                                                                                                                                                                                                                                                                                                                                                                                                                                                                                                                                                                                                                                                                                                                                              | 1.700262 | 1.855757 | 0.000000 |          |   |   |     |          |  |  |  |  |     |          |          |  |  |  |     |          |          |          |  |  |      |          |          |          |          |  |     |          |          |          |          |          |     |          |          |          |          |          |      |          |          |          |          |          |     |          |          |          |          |          |     |          |          |          |          |          |  |   |   |   |   |  |     |          |  |  |  |  |      |          |          |  |  |  |     |          |          |          |  |  |     |          |          |          |          |  |
| 5 B                                                                                                                                         | 2.630643                                                                                                                                                                                                                                                                                                                                                                                                                                                                                                                                                                                                                                                                                                                                                                                                                                                                                                                                                                                                                                                                                                                                                                                                                                                                                                                                                                                                                                                                                              | 1.776309 | 2.760947 | 1.770228 | 0.000000 |   |   |     |          |  |  |  |  |     |          |          |  |  |  |     |          |          |          |  |  |      |          |          |          |          |  |     |          |          |          |          |          |     |          |          |          |          |          |      |          |          |          |          |          |     |          |          |          |          |          |     |          |          |          |          |          |  |   |   |   |   |  |     |          |  |  |  |  |      |          |          |  |  |  |     |          |          |          |  |  |     |          |          |          |          |  |
| 6 C                                                                                                                                         | 1.595784                                                                                                                                                                                                                                                                                                                                                                                                                                                                                                                                                                                                                                                                                                                                                                                                                                                                                                                                                                                                                                                                                                                                                                                                                                                                                                                                                                                                                                                                                              | 2.735441 | 2.762254 | 1.617470 | 1.564692 |   |   |     |          |  |  |  |  |     |          |          |  |  |  |     |          |          |          |  |  |      |          |          |          |          |  |     |          |          |          |          |          |     |          |          |          |          |          |      |          |          |          |          |          |     |          |          |          |          |          |     |          |          |          |          |          |  |   |   |   |   |  |     |          |  |  |  |  |      |          |          |  |  |  |     |          |          |          |  |  |     |          |          |          |          |  |
| 7 Fe                                                                                                                                        | 2.142961                                                                                                                                                                                                                                                                                                                                                                                                                                                                                                                                                                                                                                                                                                                                                                                                                                                                                                                                                                                                                                                                                                                                                                                                                                                                                                                                                                                                                                                                                              | 3.212733 | 3.019838 | 2.997259 | 2.208604 |   |   |     |          |  |  |  |  |     |          |          |  |  |  |     |          |          |          |  |  |      |          |          |          |          |  |     |          |          |          |          |          |     |          |          |          |          |          |      |          |          |          |          |          |     |          |          |          |          |          |     |          |          |          |          |          |  |   |   |   |   |  |     |          |  |  |  |  |      |          |          |  |  |  |     |          |          |          |  |  |     |          |          |          |          |  |
| 8 B                                                                                                                                         | 1.697455                                                                                                                                                                                                                                                                                                                                                                                                                                                                                                                                                                                                                                                                                                                                                                                                                                                                                                                                                                                                                                                                                                                                                                                                                                                                                                                                                                                                                                                                                              | 3.006245 | 1.762678 | 2.919255 | 3.144044 |   |   |     |          |  |  |  |  |     |          |          |  |  |  |     |          |          |          |  |  |      |          |          |          |          |  |     |          |          |          |          |          |     |          |          |          |          |          |      |          |          |          |          |          |     |          |          |          |          |          |     |          |          |          |          |          |  |   |   |   |   |  |     |          |  |  |  |  |      |          |          |  |  |  |     |          |          |          |  |  |     |          |          |          |          |  |
| 9 P                                                                                                                                         | 2.775461                                                                                                                                                                                                                                                                                                                                                                                                                                                                                                                                                                                                                                                                                                                                                                                                                                                                                                                                                                                                                                                                                                                                                                                                                                                                                                                                                                                                                                                                                              | 1.862898 | 1.996435 | 2.786296 | 2.242177 |   |   |     |          |  |  |  |  |     |          |          |  |  |  |     |          |          |          |  |  |      |          |          |          |          |  |     |          |          |          |          |          |     |          |          |          |          |          |      |          |          |          |          |          |     |          |          |          |          |          |     |          |          |          |          |          |  |   |   |   |   |  |     |          |  |  |  |  |      |          |          |  |  |  |     |          |          |          |  |  |     |          |          |          |          |  |
|                                                                                                                                             | 6                                                                                                                                                                                                                                                                                                                                                                                                                                                                                                                                                                                                                                                                                                                                                                                                                                                                                                                                                                                                                                                                                                                                                                                                                                                                                                                                                                                                                                                                                                     | 7        | 8        | 9        |          |   |   |     |          |  |  |  |  |     |          |          |  |  |  |     |          |          |          |  |  |      |          |          |          |          |  |     |          |          |          |          |          |     |          |          |          |          |          |      |          |          |          |          |          |     |          |          |          |          |          |     |          |          |          |          |          |  |   |   |   |   |  |     |          |  |  |  |  |      |          |          |  |  |  |     |          |          |          |  |  |     |          |          |          |          |  |
| 6 C                                                                                                                                         | 0.000000                                                                                                                                                                                                                                                                                                                                                                                                                                                                                                                                                                                                                                                                                                                                                                                                                                                                                                                                                                                                                                                                                                                                                                                                                                                                                                                                                                                                                                                                                              |          |          |          |          |   |   |     |          |  |  |  |  |     |          |          |  |  |  |     |          |          |          |  |  |      |          |          |          |          |  |     |          |          |          |          |          |     |          |          |          |          |          |      |          |          |          |          |          |     |          |          |          |          |          |     |          |          |          |          |          |  |   |   |   |   |  |     |          |  |  |  |  |      |          |          |  |  |  |     |          |          |          |  |  |     |          |          |          |          |  |
| 7 Fe                                                                                                                                        | 1.946570                                                                                                                                                                                                                                                                                                                                                                                                                                                                                                                                                                                                                                                                                                                                                                                                                                                                                                                                                                                                                                                                                                                                                                                                                                                                                                                                                                                                                                                                                              | 0.000000 |          |          |          |   |   |     |          |  |  |  |  |     |          |          |  |  |  |     |          |          |          |  |  |      |          |          |          |          |  |     |          |          |          |          |          |     |          |          |          |          |          |      |          |          |          |          |          |     |          |          |          |          |          |     |          |          |          |          |          |  |   |   |   |   |  |     |          |  |  |  |  |      |          |          |  |  |  |     |          |          |          |  |  |     |          |          |          |          |  |
| 8 B                                                                                                                                         | 2.813053                                                                                                                                                                                                                                                                                                                                                                                                                                                                                                                                                                                                                                                                                                                                                                                                                                                                                                                                                                                                                                                                                                                                                                                                                                                                                                                                                                                                                                                                                              | 2.034301 | 0.000000 |          |          |   |   |     |          |  |  |  |  |     |          |          |  |  |  |     |          |          |          |  |  |      |          |          |          |          |  |     |          |          |          |          |          |     |          |          |          |          |          |      |          |          |          |          |          |     |          |          |          |          |          |     |          |          |          |          |          |  |   |   |   |   |  |     |          |  |  |  |  |      |          |          |  |  |  |     |          |          |          |  |  |     |          |          |          |          |  |
| 9 P                                                                                                                                         | 2.955650                                                                                                                                                                                                                                                                                                                                                                                                                                                                                                                                                                                                                                                                                                                                                                                                                                                                                                                                                                                                                                                                                                                                                                                                                                                                                                                                                                                                                                                                                              | 2.176327 | 1.915518 | 0.000000 |          |   |   |     |          |  |  |  |  |     |          |          |  |  |  |     |          |          |          |  |  |      |          |          |          |          |  |     |          |          |          |          |          |     |          |          |          |          |          |      |          |          |          |          |          |     |          |          |          |          |          |     |          |          |          |          |          |  |   |   |   |   |  |     |          |  |  |  |  |      |          |          |  |  |  |     |          |          |          |  |  |     |          |          |          |          |  |
|  <p>3. -2029.6760146 +4.2<br/>C<sub>1</sub> H/L 1.97</p> | <table border="1"> <thead> <tr> <th></th> <th>1</th> <th>2</th> <th>3</th> <th>4</th> <th>5</th> </tr> </thead> <tbody> <tr><td>1 C</td><td>0.000000</td><td></td><td></td><td></td><td></td></tr> <tr><td>2 B</td><td>1.606699</td><td>0.000000</td><td></td><td></td><td></td></tr> <tr><td>3 B</td><td>2.778911</td><td>2.658404</td><td>0.000000</td><td></td><td></td></tr> <tr><td>4 Fe</td><td>3.135334</td><td>2.183661</td><td>2.271395</td><td>0.000000</td><td></td></tr> <tr><td>5 B</td><td>2.737332</td><td>1.722721</td><td>1.714028</td><td>1.995285</td><td>0.000000</td></tr> <tr><td>6 B</td><td>1.595947</td><td>1.866154</td><td>2.759248</td><td>2.195099</td><td>2.916178</td></tr> <tr><td>7 P</td><td>2.906597</td><td>3.088281</td><td>1.903006</td><td>2.097784</td><td>3.024212</td></tr> <tr><td>8 B</td><td>1.611734</td><td>1.783555</td><td>1.889823</td><td>3.052240</td><td>1.718873</td></tr> <tr><td>9 B</td><td>1.577285</td><td>2.614675</td><td>1.970414</td><td>3.117243</td><td>2.911796</td></tr> <tr> <th></th> <th>6</th> <th>7</th> <th>8</th> <th>9</th> <th></th> </tr> <tr><td>6 B</td><td>0.000000</td><td></td><td></td><td></td><td></td></tr> <tr><td>7 P</td><td>1.954178</td><td>0.000000</td><td></td><td></td><td></td></tr> <tr><td>8 B</td><td>2.631194</td><td>3.072645</td><td>0.000000</td><td></td><td></td></tr> <tr><td>9 B</td><td>1.911373</td><td>1.935188</td><td>1.859954</td><td>0.000000</td><td></td></tr> </tbody> </table>  |          | 1        | 2        | 3        | 4 | 5 | 1 C | 0.000000 |  |  |  |  | 2 B | 1.606699 | 0.000000 |  |  |  | 3 B | 2.778911 | 2.658404 | 0.000000 |  |  | 4 Fe | 3.135334 | 2.183661 | 2.271395 | 0.000000 |  | 5 B | 2.737332 | 1.722721 | 1.714028 | 1.995285 | 0.000000 | 6 B | 1.595947 | 1.866154 | 2.759248 | 2.195099 | 2.916178 | 7 P  | 2.906597 | 3.088281 | 1.903006 | 2.097784 | 3.024212 | 8 B | 1.611734 | 1.783555 | 1.889823 | 3.052240 | 1.718873 | 9 B | 1.577285 | 2.614675 | 1.970414 | 3.117243 | 2.911796 |  | 6 | 7 | 8 | 9 |  | 6 B | 0.000000 |  |  |  |  | 7 P  | 1.954178 | 0.000000 |  |  |  | 8 B | 2.631194 | 3.072645 | 0.000000 |  |  | 9 B | 1.911373 | 1.935188 | 1.859954 | 0.000000 |  |
|                                                                                                                                             | 1                                                                                                                                                                                                                                                                                                                                                                                                                                                                                                                                                                                                                                                                                                                                                                                                                                                                                                                                                                                                                                                                                                                                                                                                                                                                                                                                                                                                                                                                                                     | 2        | 3        | 4        | 5        |   |   |     |          |  |  |  |  |     |          |          |  |  |  |     |          |          |          |  |  |      |          |          |          |          |  |     |          |          |          |          |          |     |          |          |          |          |          |      |          |          |          |          |          |     |          |          |          |          |          |     |          |          |          |          |          |  |   |   |   |   |  |     |          |  |  |  |  |      |          |          |  |  |  |     |          |          |          |  |  |     |          |          |          |          |  |
| 1 C                                                                                                                                         | 0.000000                                                                                                                                                                                                                                                                                                                                                                                                                                                                                                                                                                                                                                                                                                                                                                                                                                                                                                                                                                                                                                                                                                                                                                                                                                                                                                                                                                                                                                                                                              |          |          |          |          |   |   |     |          |  |  |  |  |     |          |          |  |  |  |     |          |          |          |  |  |      |          |          |          |          |  |     |          |          |          |          |          |     |          |          |          |          |          |      |          |          |          |          |          |     |          |          |          |          |          |     |          |          |          |          |          |  |   |   |   |   |  |     |          |  |  |  |  |      |          |          |  |  |  |     |          |          |          |  |  |     |          |          |          |          |  |
| 2 B                                                                                                                                         | 1.606699                                                                                                                                                                                                                                                                                                                                                                                                                                                                                                                                                                                                                                                                                                                                                                                                                                                                                                                                                                                                                                                                                                                                                                                                                                                                                                                                                                                                                                                                                              | 0.000000 |          |          |          |   |   |     |          |  |  |  |  |     |          |          |  |  |  |     |          |          |          |  |  |      |          |          |          |          |  |     |          |          |          |          |          |     |          |          |          |          |          |      |          |          |          |          |          |     |          |          |          |          |          |     |          |          |          |          |          |  |   |   |   |   |  |     |          |  |  |  |  |      |          |          |  |  |  |     |          |          |          |  |  |     |          |          |          |          |  |
| 3 B                                                                                                                                         | 2.778911                                                                                                                                                                                                                                                                                                                                                                                                                                                                                                                                                                                                                                                                                                                                                                                                                                                                                                                                                                                                                                                                                                                                                                                                                                                                                                                                                                                                                                                                                              | 2.658404 | 0.000000 |          |          |   |   |     |          |  |  |  |  |     |          |          |  |  |  |     |          |          |          |  |  |      |          |          |          |          |  |     |          |          |          |          |          |     |          |          |          |          |          |      |          |          |          |          |          |     |          |          |          |          |          |     |          |          |          |          |          |  |   |   |   |   |  |     |          |  |  |  |  |      |          |          |  |  |  |     |          |          |          |  |  |     |          |          |          |          |  |
| 4 Fe                                                                                                                                        | 3.135334                                                                                                                                                                                                                                                                                                                                                                                                                                                                                                                                                                                                                                                                                                                                                                                                                                                                                                                                                                                                                                                                                                                                                                                                                                                                                                                                                                                                                                                                                              | 2.183661 | 2.271395 | 0.000000 |          |   |   |     |          |  |  |  |  |     |          |          |  |  |  |     |          |          |          |  |  |      |          |          |          |          |  |     |          |          |          |          |          |     |          |          |          |          |          |      |          |          |          |          |          |     |          |          |          |          |          |     |          |          |          |          |          |  |   |   |   |   |  |     |          |  |  |  |  |      |          |          |  |  |  |     |          |          |          |  |  |     |          |          |          |          |  |
| 5 B                                                                                                                                         | 2.737332                                                                                                                                                                                                                                                                                                                                                                                                                                                                                                                                                                                                                                                                                                                                                                                                                                                                                                                                                                                                                                                                                                                                                                                                                                                                                                                                                                                                                                                                                              | 1.722721 | 1.714028 | 1.995285 | 0.000000 |   |   |     |          |  |  |  |  |     |          |          |  |  |  |     |          |          |          |  |  |      |          |          |          |          |  |     |          |          |          |          |          |     |          |          |          |          |          |      |          |          |          |          |          |     |          |          |          |          |          |     |          |          |          |          |          |  |   |   |   |   |  |     |          |  |  |  |  |      |          |          |  |  |  |     |          |          |          |  |  |     |          |          |          |          |  |
| 6 B                                                                                                                                         | 1.595947                                                                                                                                                                                                                                                                                                                                                                                                                                                                                                                                                                                                                                                                                                                                                                                                                                                                                                                                                                                                                                                                                                                                                                                                                                                                                                                                                                                                                                                                                              | 1.866154 | 2.759248 | 2.195099 | 2.916178 |   |   |     |          |  |  |  |  |     |          |          |  |  |  |     |          |          |          |  |  |      |          |          |          |          |  |     |          |          |          |          |          |     |          |          |          |          |          |      |          |          |          |          |          |     |          |          |          |          |          |     |          |          |          |          |          |  |   |   |   |   |  |     |          |  |  |  |  |      |          |          |  |  |  |     |          |          |          |  |  |     |          |          |          |          |  |
| 7 P                                                                                                                                         | 2.906597                                                                                                                                                                                                                                                                                                                                                                                                                                                                                                                                                                                                                                                                                                                                                                                                                                                                                                                                                                                                                                                                                                                                                                                                                                                                                                                                                                                                                                                                                              | 3.088281 | 1.903006 | 2.097784 | 3.024212 |   |   |     |          |  |  |  |  |     |          |          |  |  |  |     |          |          |          |  |  |      |          |          |          |          |  |     |          |          |          |          |          |     |          |          |          |          |          |      |          |          |          |          |          |     |          |          |          |          |          |     |          |          |          |          |          |  |   |   |   |   |  |     |          |  |  |  |  |      |          |          |  |  |  |     |          |          |          |  |  |     |          |          |          |          |  |
| 8 B                                                                                                                                         | 1.611734                                                                                                                                                                                                                                                                                                                                                                                                                                                                                                                                                                                                                                                                                                                                                                                                                                                                                                                                                                                                                                                                                                                                                                                                                                                                                                                                                                                                                                                                                              | 1.783555 | 1.889823 | 3.052240 | 1.718873 |   |   |     |          |  |  |  |  |     |          |          |  |  |  |     |          |          |          |  |  |      |          |          |          |          |  |     |          |          |          |          |          |     |          |          |          |          |          |      |          |          |          |          |          |     |          |          |          |          |          |     |          |          |          |          |          |  |   |   |   |   |  |     |          |  |  |  |  |      |          |          |  |  |  |     |          |          |          |  |  |     |          |          |          |          |  |
| 9 B                                                                                                                                         | 1.577285                                                                                                                                                                                                                                                                                                                                                                                                                                                                                                                                                                                                                                                                                                                                                                                                                                                                                                                                                                                                                                                                                                                                                                                                                                                                                                                                                                                                                                                                                              | 2.614675 | 1.970414 | 3.117243 | 2.911796 |   |   |     |          |  |  |  |  |     |          |          |  |  |  |     |          |          |          |  |  |      |          |          |          |          |  |     |          |          |          |          |          |     |          |          |          |          |          |      |          |          |          |          |          |     |          |          |          |          |          |     |          |          |          |          |          |  |   |   |   |   |  |     |          |  |  |  |  |      |          |          |  |  |  |     |          |          |          |  |  |     |          |          |          |          |  |
|                                                                                                                                             | 6                                                                                                                                                                                                                                                                                                                                                                                                                                                                                                                                                                                                                                                                                                                                                                                                                                                                                                                                                                                                                                                                                                                                                                                                                                                                                                                                                                                                                                                                                                     | 7        | 8        | 9        |          |   |   |     |          |  |  |  |  |     |          |          |  |  |  |     |          |          |          |  |  |      |          |          |          |          |  |     |          |          |          |          |          |     |          |          |          |          |          |      |          |          |          |          |          |     |          |          |          |          |          |     |          |          |          |          |          |  |   |   |   |   |  |     |          |  |  |  |  |      |          |          |  |  |  |     |          |          |          |  |  |     |          |          |          |          |  |
| 6 B                                                                                                                                         | 0.000000                                                                                                                                                                                                                                                                                                                                                                                                                                                                                                                                                                                                                                                                                                                                                                                                                                                                                                                                                                                                                                                                                                                                                                                                                                                                                                                                                                                                                                                                                              |          |          |          |          |   |   |     |          |  |  |  |  |     |          |          |  |  |  |     |          |          |          |  |  |      |          |          |          |          |  |     |          |          |          |          |          |     |          |          |          |          |          |      |          |          |          |          |          |     |          |          |          |          |          |     |          |          |          |          |          |  |   |   |   |   |  |     |          |  |  |  |  |      |          |          |  |  |  |     |          |          |          |  |  |     |          |          |          |          |  |
| 7 P                                                                                                                                         | 1.954178                                                                                                                                                                                                                                                                                                                                                                                                                                                                                                                                                                                                                                                                                                                                                                                                                                                                                                                                                                                                                                                                                                                                                                                                                                                                                                                                                                                                                                                                                              | 0.000000 |          |          |          |   |   |     |          |  |  |  |  |     |          |          |  |  |  |     |          |          |          |  |  |      |          |          |          |          |  |     |          |          |          |          |          |     |          |          |          |          |          |      |          |          |          |          |          |     |          |          |          |          |          |     |          |          |          |          |          |  |   |   |   |   |  |     |          |  |  |  |  |      |          |          |  |  |  |     |          |          |          |  |  |     |          |          |          |          |  |
| 8 B                                                                                                                                         | 2.631194                                                                                                                                                                                                                                                                                                                                                                                                                                                                                                                                                                                                                                                                                                                                                                                                                                                                                                                                                                                                                                                                                                                                                                                                                                                                                                                                                                                                                                                                                              | 3.072645 | 0.000000 |          |          |   |   |     |          |  |  |  |  |     |          |          |  |  |  |     |          |          |          |  |  |      |          |          |          |          |  |     |          |          |          |          |          |     |          |          |          |          |          |      |          |          |          |          |          |     |          |          |          |          |          |     |          |          |          |          |          |  |   |   |   |   |  |     |          |  |  |  |  |      |          |          |  |  |  |     |          |          |          |  |  |     |          |          |          |          |  |
| 9 B                                                                                                                                         | 1.911373                                                                                                                                                                                                                                                                                                                                                                                                                                                                                                                                                                                                                                                                                                                                                                                                                                                                                                                                                                                                                                                                                                                                                                                                                                                                                                                                                                                                                                                                                              | 1.935188 | 1.859954 | 0.000000 |          |   |   |     |          |  |  |  |  |     |          |          |  |  |  |     |          |          |          |  |  |      |          |          |          |          |  |     |          |          |          |          |          |     |          |          |          |          |          |      |          |          |          |          |          |     |          |          |          |          |          |     |          |          |          |          |          |  |   |   |   |   |  |     |          |  |  |  |  |      |          |          |  |  |  |     |          |          |          |  |  |     |          |          |          |          |  |

| 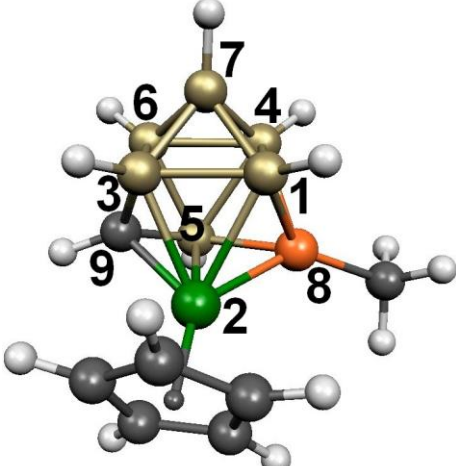 <p>4. -2029.6703650 +7.7<br/>C<sub>1</sub> H/L 1.91</p>    | <table border="1"> <thead> <tr> <th></th> <th>1</th> <th>2</th> <th>3</th> <th>4</th> <th>5</th> </tr> </thead> <tbody> <tr><td>1 B</td><td>0.000000</td><td></td><td></td><td></td><td></td></tr> <tr><td>2 Fe</td><td>2.298913</td><td>0.000000</td><td></td><td></td><td></td></tr> <tr><td>3 B</td><td>1.898847</td><td>2.204324</td><td>0.000000</td><td></td><td></td></tr> <tr><td>4 B</td><td>1.878097</td><td>3.148064</td><td>2.630836</td><td>0.000000</td><td></td></tr> <tr><td>5 B</td><td>2.787045</td><td>2.221681</td><td>2.623600</td><td>2.034044</td><td>0.000000</td></tr> <tr><td>6 B</td><td>2.645117</td><td>3.079367</td><td>1.793022</td><td>1.891904</td><td>1.897666</td></tr> <tr><td>7 B</td><td>1.686287</td><td>3.327790</td><td>1.710718</td><td>1.687630</td><td>2.940681</td></tr> <tr><td>8 P</td><td>1.933743</td><td>2.097426</td><td>3.056596</td><td>1.911840</td><td>1.931166</td></tr> <tr><td>9 C</td><td>2.811579</td><td>1.939688</td><td>1.609287</td><td>2.785017</td><td>1.576098</td></tr> <tr> <th></th> <th>6</th> <th>7</th> <th>8</th> <th>9</th> <th></th> </tr> <tr><td>6 B</td><td>0.000000</td><td></td><td></td><td></td><td></td></tr> <tr><td>7 B</td><td>1.696180</td><td>0.000000</td><td></td><td></td><td></td></tr> <tr><td>8 P</td><td>3.068050</td><td>3.029829</td><td>0.000000</td><td></td><td></td></tr> <tr><td>9 C</td><td>1.615363</td><td>2.723576</td><td>2.895229</td><td>0.000000</td><td></td></tr> </tbody> </table>  |          | 1        | 2        | 3        | 4 | 5 | 1 B  | 0.000000 |  |  |  |  | 2 Fe | 2.298913 | 0.000000 |  |  |  | 3 B | 1.898847 | 2.204324 | 0.000000 |  |  | 4 B | 1.878097 | 3.148064 | 2.630836 | 0.000000 |  | 5 B | 2.787045 | 2.221681 | 2.623600 | 2.034044 | 0.000000 | 6 B | 2.645117 | 3.079367 | 1.793022 | 1.891904 | 1.897666 | 7 B | 1.686287 | 3.327790 | 1.710718 | 1.687630 | 2.940681 | 8 P | 1.933743 | 2.097426 | 3.056596 | 1.911840 | 1.931166 | 9 C  | 2.811579 | 1.939688 | 1.609287 | 2.785017 | 1.576098 |  | 6 | 7 | 8 | 9 |  | 6 B | 0.000000 |  |  |  |  | 7 B | 1.696180 | 0.000000 |  |  |  | 8 P | 3.068050 | 3.029829 | 0.000000 |  |  | 9 C  | 1.615363 | 2.723576 | 2.895229 | 0.000000 |  |
|----------------------------------------------------------------------------------------------------------------------------------------------|-------------------------------------------------------------------------------------------------------------------------------------------------------------------------------------------------------------------------------------------------------------------------------------------------------------------------------------------------------------------------------------------------------------------------------------------------------------------------------------------------------------------------------------------------------------------------------------------------------------------------------------------------------------------------------------------------------------------------------------------------------------------------------------------------------------------------------------------------------------------------------------------------------------------------------------------------------------------------------------------------------------------------------------------------------------------------------------------------------------------------------------------------------------------------------------------------------------------------------------------------------------------------------------------------------------------------------------------------------------------------------------------------------------------------------------------------------------------------------------------------------|----------|----------|----------|----------|---|---|------|----------|--|--|--|--|------|----------|----------|--|--|--|-----|----------|----------|----------|--|--|-----|----------|----------|----------|----------|--|-----|----------|----------|----------|----------|----------|-----|----------|----------|----------|----------|----------|-----|----------|----------|----------|----------|----------|-----|----------|----------|----------|----------|----------|------|----------|----------|----------|----------|----------|--|---|---|---|---|--|-----|----------|--|--|--|--|-----|----------|----------|--|--|--|-----|----------|----------|----------|--|--|------|----------|----------|----------|----------|--|
|                                                                                                                                              | 1                                                                                                                                                                                                                                                                                                                                                                                                                                                                                                                                                                                                                                                                                                                                                                                                                                                                                                                                                                                                                                                                                                                                                                                                                                                                                                                                                                                                                                                                                                     | 2        | 3        | 4        | 5        |   |   |      |          |  |  |  |  |      |          |          |  |  |  |     |          |          |          |  |  |     |          |          |          |          |  |     |          |          |          |          |          |     |          |          |          |          |          |     |          |          |          |          |          |     |          |          |          |          |          |      |          |          |          |          |          |  |   |   |   |   |  |     |          |  |  |  |  |     |          |          |  |  |  |     |          |          |          |  |  |      |          |          |          |          |  |
| 1 B                                                                                                                                          | 0.000000                                                                                                                                                                                                                                                                                                                                                                                                                                                                                                                                                                                                                                                                                                                                                                                                                                                                                                                                                                                                                                                                                                                                                                                                                                                                                                                                                                                                                                                                                              |          |          |          |          |   |   |      |          |  |  |  |  |      |          |          |  |  |  |     |          |          |          |  |  |     |          |          |          |          |  |     |          |          |          |          |          |     |          |          |          |          |          |     |          |          |          |          |          |     |          |          |          |          |          |      |          |          |          |          |          |  |   |   |   |   |  |     |          |  |  |  |  |     |          |          |  |  |  |     |          |          |          |  |  |      |          |          |          |          |  |
| 2 Fe                                                                                                                                         | 2.298913                                                                                                                                                                                                                                                                                                                                                                                                                                                                                                                                                                                                                                                                                                                                                                                                                                                                                                                                                                                                                                                                                                                                                                                                                                                                                                                                                                                                                                                                                              | 0.000000 |          |          |          |   |   |      |          |  |  |  |  |      |          |          |  |  |  |     |          |          |          |  |  |     |          |          |          |          |  |     |          |          |          |          |          |     |          |          |          |          |          |     |          |          |          |          |          |     |          |          |          |          |          |      |          |          |          |          |          |  |   |   |   |   |  |     |          |  |  |  |  |     |          |          |  |  |  |     |          |          |          |  |  |      |          |          |          |          |  |
| 3 B                                                                                                                                          | 1.898847                                                                                                                                                                                                                                                                                                                                                                                                                                                                                                                                                                                                                                                                                                                                                                                                                                                                                                                                                                                                                                                                                                                                                                                                                                                                                                                                                                                                                                                                                              | 2.204324 | 0.000000 |          |          |   |   |      |          |  |  |  |  |      |          |          |  |  |  |     |          |          |          |  |  |     |          |          |          |          |  |     |          |          |          |          |          |     |          |          |          |          |          |     |          |          |          |          |          |     |          |          |          |          |          |      |          |          |          |          |          |  |   |   |   |   |  |     |          |  |  |  |  |     |          |          |  |  |  |     |          |          |          |  |  |      |          |          |          |          |  |
| 4 B                                                                                                                                          | 1.878097                                                                                                                                                                                                                                                                                                                                                                                                                                                                                                                                                                                                                                                                                                                                                                                                                                                                                                                                                                                                                                                                                                                                                                                                                                                                                                                                                                                                                                                                                              | 3.148064 | 2.630836 | 0.000000 |          |   |   |      |          |  |  |  |  |      |          |          |  |  |  |     |          |          |          |  |  |     |          |          |          |          |  |     |          |          |          |          |          |     |          |          |          |          |          |     |          |          |          |          |          |     |          |          |          |          |          |      |          |          |          |          |          |  |   |   |   |   |  |     |          |  |  |  |  |     |          |          |  |  |  |     |          |          |          |  |  |      |          |          |          |          |  |
| 5 B                                                                                                                                          | 2.787045                                                                                                                                                                                                                                                                                                                                                                                                                                                                                                                                                                                                                                                                                                                                                                                                                                                                                                                                                                                                                                                                                                                                                                                                                                                                                                                                                                                                                                                                                              | 2.221681 | 2.623600 | 2.034044 | 0.000000 |   |   |      |          |  |  |  |  |      |          |          |  |  |  |     |          |          |          |  |  |     |          |          |          |          |  |     |          |          |          |          |          |     |          |          |          |          |          |     |          |          |          |          |          |     |          |          |          |          |          |      |          |          |          |          |          |  |   |   |   |   |  |     |          |  |  |  |  |     |          |          |  |  |  |     |          |          |          |  |  |      |          |          |          |          |  |
| 6 B                                                                                                                                          | 2.645117                                                                                                                                                                                                                                                                                                                                                                                                                                                                                                                                                                                                                                                                                                                                                                                                                                                                                                                                                                                                                                                                                                                                                                                                                                                                                                                                                                                                                                                                                              | 3.079367 | 1.793022 | 1.891904 | 1.897666 |   |   |      |          |  |  |  |  |      |          |          |  |  |  |     |          |          |          |  |  |     |          |          |          |          |  |     |          |          |          |          |          |     |          |          |          |          |          |     |          |          |          |          |          |     |          |          |          |          |          |      |          |          |          |          |          |  |   |   |   |   |  |     |          |  |  |  |  |     |          |          |  |  |  |     |          |          |          |  |  |      |          |          |          |          |  |
| 7 B                                                                                                                                          | 1.686287                                                                                                                                                                                                                                                                                                                                                                                                                                                                                                                                                                                                                                                                                                                                                                                                                                                                                                                                                                                                                                                                                                                                                                                                                                                                                                                                                                                                                                                                                              | 3.327790 | 1.710718 | 1.687630 | 2.940681 |   |   |      |          |  |  |  |  |      |          |          |  |  |  |     |          |          |          |  |  |     |          |          |          |          |  |     |          |          |          |          |          |     |          |          |          |          |          |     |          |          |          |          |          |     |          |          |          |          |          |      |          |          |          |          |          |  |   |   |   |   |  |     |          |  |  |  |  |     |          |          |  |  |  |     |          |          |          |  |  |      |          |          |          |          |  |
| 8 P                                                                                                                                          | 1.933743                                                                                                                                                                                                                                                                                                                                                                                                                                                                                                                                                                                                                                                                                                                                                                                                                                                                                                                                                                                                                                                                                                                                                                                                                                                                                                                                                                                                                                                                                              | 2.097426 | 3.056596 | 1.911840 | 1.931166 |   |   |      |          |  |  |  |  |      |          |          |  |  |  |     |          |          |          |  |  |     |          |          |          |          |  |     |          |          |          |          |          |     |          |          |          |          |          |     |          |          |          |          |          |     |          |          |          |          |          |      |          |          |          |          |          |  |   |   |   |   |  |     |          |  |  |  |  |     |          |          |  |  |  |     |          |          |          |  |  |      |          |          |          |          |  |
| 9 C                                                                                                                                          | 2.811579                                                                                                                                                                                                                                                                                                                                                                                                                                                                                                                                                                                                                                                                                                                                                                                                                                                                                                                                                                                                                                                                                                                                                                                                                                                                                                                                                                                                                                                                                              | 1.939688 | 1.609287 | 2.785017 | 1.576098 |   |   |      |          |  |  |  |  |      |          |          |  |  |  |     |          |          |          |  |  |     |          |          |          |          |  |     |          |          |          |          |          |     |          |          |          |          |          |     |          |          |          |          |          |     |          |          |          |          |          |      |          |          |          |          |          |  |   |   |   |   |  |     |          |  |  |  |  |     |          |          |  |  |  |     |          |          |          |  |  |      |          |          |          |          |  |
|                                                                                                                                              | 6                                                                                                                                                                                                                                                                                                                                                                                                                                                                                                                                                                                                                                                                                                                                                                                                                                                                                                                                                                                                                                                                                                                                                                                                                                                                                                                                                                                                                                                                                                     | 7        | 8        | 9        |          |   |   |      |          |  |  |  |  |      |          |          |  |  |  |     |          |          |          |  |  |     |          |          |          |          |  |     |          |          |          |          |          |     |          |          |          |          |          |     |          |          |          |          |          |     |          |          |          |          |          |      |          |          |          |          |          |  |   |   |   |   |  |     |          |  |  |  |  |     |          |          |  |  |  |     |          |          |          |  |  |      |          |          |          |          |  |
| 6 B                                                                                                                                          | 0.000000                                                                                                                                                                                                                                                                                                                                                                                                                                                                                                                                                                                                                                                                                                                                                                                                                                                                                                                                                                                                                                                                                                                                                                                                                                                                                                                                                                                                                                                                                              |          |          |          |          |   |   |      |          |  |  |  |  |      |          |          |  |  |  |     |          |          |          |  |  |     |          |          |          |          |  |     |          |          |          |          |          |     |          |          |          |          |          |     |          |          |          |          |          |     |          |          |          |          |          |      |          |          |          |          |          |  |   |   |   |   |  |     |          |  |  |  |  |     |          |          |  |  |  |     |          |          |          |  |  |      |          |          |          |          |  |
| 7 B                                                                                                                                          | 1.696180                                                                                                                                                                                                                                                                                                                                                                                                                                                                                                                                                                                                                                                                                                                                                                                                                                                                                                                                                                                                                                                                                                                                                                                                                                                                                                                                                                                                                                                                                              | 0.000000 |          |          |          |   |   |      |          |  |  |  |  |      |          |          |  |  |  |     |          |          |          |  |  |     |          |          |          |          |  |     |          |          |          |          |          |     |          |          |          |          |          |     |          |          |          |          |          |     |          |          |          |          |          |      |          |          |          |          |          |  |   |   |   |   |  |     |          |  |  |  |  |     |          |          |  |  |  |     |          |          |          |  |  |      |          |          |          |          |  |
| 8 P                                                                                                                                          | 3.068050                                                                                                                                                                                                                                                                                                                                                                                                                                                                                                                                                                                                                                                                                                                                                                                                                                                                                                                                                                                                                                                                                                                                                                                                                                                                                                                                                                                                                                                                                              | 3.029829 | 0.000000 |          |          |   |   |      |          |  |  |  |  |      |          |          |  |  |  |     |          |          |          |  |  |     |          |          |          |          |  |     |          |          |          |          |          |     |          |          |          |          |          |     |          |          |          |          |          |     |          |          |          |          |          |      |          |          |          |          |          |  |   |   |   |   |  |     |          |  |  |  |  |     |          |          |  |  |  |     |          |          |          |  |  |      |          |          |          |          |  |
| 9 C                                                                                                                                          | 1.615363                                                                                                                                                                                                                                                                                                                                                                                                                                                                                                                                                                                                                                                                                                                                                                                                                                                                                                                                                                                                                                                                                                                                                                                                                                                                                                                                                                                                                                                                                              | 2.723576 | 2.895229 | 0.000000 |          |   |   |      |          |  |  |  |  |      |          |          |  |  |  |     |          |          |          |  |  |     |          |          |          |          |  |     |          |          |          |          |          |     |          |          |          |          |          |     |          |          |          |          |          |     |          |          |          |          |          |      |          |          |          |          |          |  |   |   |   |   |  |     |          |  |  |  |  |     |          |          |  |  |  |     |          |          |          |  |  |      |          |          |          |          |  |
|  <p>5. -2029.6690718 +8.5<br/>C<sub>1</sub> H/L 2.39</p>   | <table border="1"> <thead> <tr> <th></th> <th>1</th> <th>2</th> <th>3</th> <th>4</th> <th>5</th> </tr> </thead> <tbody> <tr><td>1 B</td><td>0.000000</td><td></td><td></td><td></td><td></td></tr> <tr><td>2 C</td><td>1.541217</td><td>0.000000</td><td></td><td></td><td></td></tr> <tr><td>3 B</td><td>2.964110</td><td>3.195700</td><td>0.000000</td><td></td><td></td></tr> <tr><td>4 B</td><td>1.727764</td><td>2.560629</td><td>1.680034</td><td>0.000000</td><td></td></tr> <tr><td>5 B</td><td>1.744493</td><td>1.675867</td><td>2.894392</td><td>1.816068</td><td>0.000000</td></tr> <tr><td>6 B</td><td>2.887489</td><td>2.712521</td><td>1.786370</td><td>1.820126</td><td>1.768911</td></tr> <tr><td>7 P</td><td>3.373490</td><td>2.674767</td><td>1.881484</td><td>2.869033</td><td>2.980294</td></tr> <tr><td>8 B</td><td>2.761695</td><td>1.603847</td><td>2.950894</td><td>2.850500</td><td>1.766475</td></tr> <tr><td>9 Fe</td><td>2.014789</td><td>2.142888</td><td>2.075807</td><td>2.212182</td><td>2.926388</td></tr> <tr> <th></th> <th>6</th> <th>7</th> <th>8</th> <th>9</th> <th></th> </tr> <tr><td>6 B</td><td>0.000000</td><td></td><td></td><td></td><td></td></tr> <tr><td>7 P</td><td>2.011092</td><td>0.000000</td><td></td><td></td><td></td></tr> <tr><td>8 B</td><td>1.882394</td><td>1.895147</td><td>0.000000</td><td></td><td></td></tr> <tr><td>9 Fe</td><td>2.954147</td><td>2.251434</td><td>2.849671</td><td>0.000000</td><td></td></tr> </tbody> </table> |          | 1        | 2        | 3        | 4 | 5 | 1 B  | 0.000000 |  |  |  |  | 2 C  | 1.541217 | 0.000000 |  |  |  | 3 B | 2.964110 | 3.195700 | 0.000000 |  |  | 4 B | 1.727764 | 2.560629 | 1.680034 | 0.000000 |  | 5 B | 1.744493 | 1.675867 | 2.894392 | 1.816068 | 0.000000 | 6 B | 2.887489 | 2.712521 | 1.786370 | 1.820126 | 1.768911 | 7 P | 3.373490 | 2.674767 | 1.881484 | 2.869033 | 2.980294 | 8 B | 2.761695 | 1.603847 | 2.950894 | 2.850500 | 1.766475 | 9 Fe | 2.014789 | 2.142888 | 2.075807 | 2.212182 | 2.926388 |  | 6 | 7 | 8 | 9 |  | 6 B | 0.000000 |  |  |  |  | 7 P | 2.011092 | 0.000000 |  |  |  | 8 B | 1.882394 | 1.895147 | 0.000000 |  |  | 9 Fe | 2.954147 | 2.251434 | 2.849671 | 0.000000 |  |
|                                                                                                                                              | 1                                                                                                                                                                                                                                                                                                                                                                                                                                                                                                                                                                                                                                                                                                                                                                                                                                                                                                                                                                                                                                                                                                                                                                                                                                                                                                                                                                                                                                                                                                     | 2        | 3        | 4        | 5        |   |   |      |          |  |  |  |  |      |          |          |  |  |  |     |          |          |          |  |  |     |          |          |          |          |  |     |          |          |          |          |          |     |          |          |          |          |          |     |          |          |          |          |          |     |          |          |          |          |          |      |          |          |          |          |          |  |   |   |   |   |  |     |          |  |  |  |  |     |          |          |  |  |  |     |          |          |          |  |  |      |          |          |          |          |  |
| 1 B                                                                                                                                          | 0.000000                                                                                                                                                                                                                                                                                                                                                                                                                                                                                                                                                                                                                                                                                                                                                                                                                                                                                                                                                                                                                                                                                                                                                                                                                                                                                                                                                                                                                                                                                              |          |          |          |          |   |   |      |          |  |  |  |  |      |          |          |  |  |  |     |          |          |          |  |  |     |          |          |          |          |  |     |          |          |          |          |          |     |          |          |          |          |          |     |          |          |          |          |          |     |          |          |          |          |          |      |          |          |          |          |          |  |   |   |   |   |  |     |          |  |  |  |  |     |          |          |  |  |  |     |          |          |          |  |  |      |          |          |          |          |  |
| 2 C                                                                                                                                          | 1.541217                                                                                                                                                                                                                                                                                                                                                                                                                                                                                                                                                                                                                                                                                                                                                                                                                                                                                                                                                                                                                                                                                                                                                                                                                                                                                                                                                                                                                                                                                              | 0.000000 |          |          |          |   |   |      |          |  |  |  |  |      |          |          |  |  |  |     |          |          |          |  |  |     |          |          |          |          |  |     |          |          |          |          |          |     |          |          |          |          |          |     |          |          |          |          |          |     |          |          |          |          |          |      |          |          |          |          |          |  |   |   |   |   |  |     |          |  |  |  |  |     |          |          |  |  |  |     |          |          |          |  |  |      |          |          |          |          |  |
| 3 B                                                                                                                                          | 2.964110                                                                                                                                                                                                                                                                                                                                                                                                                                                                                                                                                                                                                                                                                                                                                                                                                                                                                                                                                                                                                                                                                                                                                                                                                                                                                                                                                                                                                                                                                              | 3.195700 | 0.000000 |          |          |   |   |      |          |  |  |  |  |      |          |          |  |  |  |     |          |          |          |  |  |     |          |          |          |          |  |     |          |          |          |          |          |     |          |          |          |          |          |     |          |          |          |          |          |     |          |          |          |          |          |      |          |          |          |          |          |  |   |   |   |   |  |     |          |  |  |  |  |     |          |          |  |  |  |     |          |          |          |  |  |      |          |          |          |          |  |
| 4 B                                                                                                                                          | 1.727764                                                                                                                                                                                                                                                                                                                                                                                                                                                                                                                                                                                                                                                                                                                                                                                                                                                                                                                                                                                                                                                                                                                                                                                                                                                                                                                                                                                                                                                                                              | 2.560629 | 1.680034 | 0.000000 |          |   |   |      |          |  |  |  |  |      |          |          |  |  |  |     |          |          |          |  |  |     |          |          |          |          |  |     |          |          |          |          |          |     |          |          |          |          |          |     |          |          |          |          |          |     |          |          |          |          |          |      |          |          |          |          |          |  |   |   |   |   |  |     |          |  |  |  |  |     |          |          |  |  |  |     |          |          |          |  |  |      |          |          |          |          |  |
| 5 B                                                                                                                                          | 1.744493                                                                                                                                                                                                                                                                                                                                                                                                                                                                                                                                                                                                                                                                                                                                                                                                                                                                                                                                                                                                                                                                                                                                                                                                                                                                                                                                                                                                                                                                                              | 1.675867 | 2.894392 | 1.816068 | 0.000000 |   |   |      |          |  |  |  |  |      |          |          |  |  |  |     |          |          |          |  |  |     |          |          |          |          |  |     |          |          |          |          |          |     |          |          |          |          |          |     |          |          |          |          |          |     |          |          |          |          |          |      |          |          |          |          |          |  |   |   |   |   |  |     |          |  |  |  |  |     |          |          |  |  |  |     |          |          |          |  |  |      |          |          |          |          |  |
| 6 B                                                                                                                                          | 2.887489                                                                                                                                                                                                                                                                                                                                                                                                                                                                                                                                                                                                                                                                                                                                                                                                                                                                                                                                                                                                                                                                                                                                                                                                                                                                                                                                                                                                                                                                                              | 2.712521 | 1.786370 | 1.820126 | 1.768911 |   |   |      |          |  |  |  |  |      |          |          |  |  |  |     |          |          |          |  |  |     |          |          |          |          |  |     |          |          |          |          |          |     |          |          |          |          |          |     |          |          |          |          |          |     |          |          |          |          |          |      |          |          |          |          |          |  |   |   |   |   |  |     |          |  |  |  |  |     |          |          |  |  |  |     |          |          |          |  |  |      |          |          |          |          |  |
| 7 P                                                                                                                                          | 3.373490                                                                                                                                                                                                                                                                                                                                                                                                                                                                                                                                                                                                                                                                                                                                                                                                                                                                                                                                                                                                                                                                                                                                                                                                                                                                                                                                                                                                                                                                                              | 2.674767 | 1.881484 | 2.869033 | 2.980294 |   |   |      |          |  |  |  |  |      |          |          |  |  |  |     |          |          |          |  |  |     |          |          |          |          |  |     |          |          |          |          |          |     |          |          |          |          |          |     |          |          |          |          |          |     |          |          |          |          |          |      |          |          |          |          |          |  |   |   |   |   |  |     |          |  |  |  |  |     |          |          |  |  |  |     |          |          |          |  |  |      |          |          |          |          |  |
| 8 B                                                                                                                                          | 2.761695                                                                                                                                                                                                                                                                                                                                                                                                                                                                                                                                                                                                                                                                                                                                                                                                                                                                                                                                                                                                                                                                                                                                                                                                                                                                                                                                                                                                                                                                                              | 1.603847 | 2.950894 | 2.850500 | 1.766475 |   |   |      |          |  |  |  |  |      |          |          |  |  |  |     |          |          |          |  |  |     |          |          |          |          |  |     |          |          |          |          |          |     |          |          |          |          |          |     |          |          |          |          |          |     |          |          |          |          |          |      |          |          |          |          |          |  |   |   |   |   |  |     |          |  |  |  |  |     |          |          |  |  |  |     |          |          |          |  |  |      |          |          |          |          |  |
| 9 Fe                                                                                                                                         | 2.014789                                                                                                                                                                                                                                                                                                                                                                                                                                                                                                                                                                                                                                                                                                                                                                                                                                                                                                                                                                                                                                                                                                                                                                                                                                                                                                                                                                                                                                                                                              | 2.142888 | 2.075807 | 2.212182 | 2.926388 |   |   |      |          |  |  |  |  |      |          |          |  |  |  |     |          |          |          |  |  |     |          |          |          |          |  |     |          |          |          |          |          |     |          |          |          |          |          |     |          |          |          |          |          |     |          |          |          |          |          |      |          |          |          |          |          |  |   |   |   |   |  |     |          |  |  |  |  |     |          |          |  |  |  |     |          |          |          |  |  |      |          |          |          |          |  |
|                                                                                                                                              | 6                                                                                                                                                                                                                                                                                                                                                                                                                                                                                                                                                                                                                                                                                                                                                                                                                                                                                                                                                                                                                                                                                                                                                                                                                                                                                                                                                                                                                                                                                                     | 7        | 8        | 9        |          |   |   |      |          |  |  |  |  |      |          |          |  |  |  |     |          |          |          |  |  |     |          |          |          |          |  |     |          |          |          |          |          |     |          |          |          |          |          |     |          |          |          |          |          |     |          |          |          |          |          |      |          |          |          |          |          |  |   |   |   |   |  |     |          |  |  |  |  |     |          |          |  |  |  |     |          |          |          |  |  |      |          |          |          |          |  |
| 6 B                                                                                                                                          | 0.000000                                                                                                                                                                                                                                                                                                                                                                                                                                                                                                                                                                                                                                                                                                                                                                                                                                                                                                                                                                                                                                                                                                                                                                                                                                                                                                                                                                                                                                                                                              |          |          |          |          |   |   |      |          |  |  |  |  |      |          |          |  |  |  |     |          |          |          |  |  |     |          |          |          |          |  |     |          |          |          |          |          |     |          |          |          |          |          |     |          |          |          |          |          |     |          |          |          |          |          |      |          |          |          |          |          |  |   |   |   |   |  |     |          |  |  |  |  |     |          |          |  |  |  |     |          |          |          |  |  |      |          |          |          |          |  |
| 7 P                                                                                                                                          | 2.011092                                                                                                                                                                                                                                                                                                                                                                                                                                                                                                                                                                                                                                                                                                                                                                                                                                                                                                                                                                                                                                                                                                                                                                                                                                                                                                                                                                                                                                                                                              | 0.000000 |          |          |          |   |   |      |          |  |  |  |  |      |          |          |  |  |  |     |          |          |          |  |  |     |          |          |          |          |  |     |          |          |          |          |          |     |          |          |          |          |          |     |          |          |          |          |          |     |          |          |          |          |          |      |          |          |          |          |          |  |   |   |   |   |  |     |          |  |  |  |  |     |          |          |  |  |  |     |          |          |          |  |  |      |          |          |          |          |  |
| 8 B                                                                                                                                          | 1.882394                                                                                                                                                                                                                                                                                                                                                                                                                                                                                                                                                                                                                                                                                                                                                                                                                                                                                                                                                                                                                                                                                                                                                                                                                                                                                                                                                                                                                                                                                              | 1.895147 | 0.000000 |          |          |   |   |      |          |  |  |  |  |      |          |          |  |  |  |     |          |          |          |  |  |     |          |          |          |          |  |     |          |          |          |          |          |     |          |          |          |          |          |     |          |          |          |          |          |     |          |          |          |          |          |      |          |          |          |          |          |  |   |   |   |   |  |     |          |  |  |  |  |     |          |          |  |  |  |     |          |          |          |  |  |      |          |          |          |          |  |
| 9 Fe                                                                                                                                         | 2.954147                                                                                                                                                                                                                                                                                                                                                                                                                                                                                                                                                                                                                                                                                                                                                                                                                                                                                                                                                                                                                                                                                                                                                                                                                                                                                                                                                                                                                                                                                              | 2.251434 | 2.849671 | 0.000000 |          |   |   |      |          |  |  |  |  |      |          |          |  |  |  |     |          |          |          |  |  |     |          |          |          |          |  |     |          |          |          |          |          |     |          |          |          |          |          |     |          |          |          |          |          |     |          |          |          |          |          |      |          |          |          |          |          |  |   |   |   |   |  |     |          |  |  |  |  |     |          |          |  |  |  |     |          |          |          |  |  |      |          |          |          |          |  |
|  <p>6. -2029.6616382 +13.2<br/>C<sub>1</sub> H/L 1.98</p> | <table border="1"> <thead> <tr> <th></th> <th>1</th> <th>2</th> <th>3</th> <th>4</th> <th>5</th> </tr> </thead> <tbody> <tr><td>1 Fe</td><td>0.000000</td><td></td><td></td><td></td><td></td></tr> <tr><td>2 P</td><td>2.769661</td><td>0.000000</td><td></td><td></td><td></td></tr> <tr><td>3 B</td><td>2.865375</td><td>2.027203</td><td>0.000000</td><td></td><td></td></tr> <tr><td>4 C</td><td>1.937395</td><td>2.792823</td><td>1.608836</td><td>0.000000</td><td></td></tr> <tr><td>5 B</td><td>2.003177</td><td>2.938399</td><td>2.921652</td><td>2.861099</td><td>0.000000</td></tr> <tr><td>6 B</td><td>2.151843</td><td>2.989286</td><td>1.808930</td><td>1.601307</td><td>1.729842</td></tr> <tr><td>7 B</td><td>2.864021</td><td>2.031478</td><td>1.845908</td><td>2.760832</td><td>1.735885</td></tr> <tr><td>8 B</td><td>2.237481</td><td>1.852442</td><td>2.981903</td><td>3.265039</td><td>1.656968</td></tr> <tr><td>9 B</td><td>2.167234</td><td>1.879278</td><td>1.869317</td><td>1.551802</td><td>3.374504</td></tr> <tr> <th></th> <th>6</th> <th>7</th> <th>8</th> <th>9</th> <th></th> </tr> <tr><td>6 B</td><td>0.000000</td><td></td><td></td><td></td><td></td></tr> <tr><td>7 B</td><td>1.818718</td><td>0.000000</td><td></td><td></td><td></td></tr> <tr><td>8 B</td><td>2.770066</td><td>1.843393</td><td>0.000000</td><td></td><td></td></tr> <tr><td>9 B</td><td>2.727512</td><td>2.986085</td><td>2.957947</td><td>0.000000</td><td></td></tr> </tbody> </table>  |          | 1        | 2        | 3        | 4 | 5 | 1 Fe | 0.000000 |  |  |  |  | 2 P  | 2.769661 | 0.000000 |  |  |  | 3 B | 2.865375 | 2.027203 | 0.000000 |  |  | 4 C | 1.937395 | 2.792823 | 1.608836 | 0.000000 |  | 5 B | 2.003177 | 2.938399 | 2.921652 | 2.861099 | 0.000000 | 6 B | 2.151843 | 2.989286 | 1.808930 | 1.601307 | 1.729842 | 7 B | 2.864021 | 2.031478 | 1.845908 | 2.760832 | 1.735885 | 8 B | 2.237481 | 1.852442 | 2.981903 | 3.265039 | 1.656968 | 9 B  | 2.167234 | 1.879278 | 1.869317 | 1.551802 | 3.374504 |  | 6 | 7 | 8 | 9 |  | 6 B | 0.000000 |  |  |  |  | 7 B | 1.818718 | 0.000000 |  |  |  | 8 B | 2.770066 | 1.843393 | 0.000000 |  |  | 9 B  | 2.727512 | 2.986085 | 2.957947 | 0.000000 |  |
|                                                                                                                                              | 1                                                                                                                                                                                                                                                                                                                                                                                                                                                                                                                                                                                                                                                                                                                                                                                                                                                                                                                                                                                                                                                                                                                                                                                                                                                                                                                                                                                                                                                                                                     | 2        | 3        | 4        | 5        |   |   |      |          |  |  |  |  |      |          |          |  |  |  |     |          |          |          |  |  |     |          |          |          |          |  |     |          |          |          |          |          |     |          |          |          |          |          |     |          |          |          |          |          |     |          |          |          |          |          |      |          |          |          |          |          |  |   |   |   |   |  |     |          |  |  |  |  |     |          |          |  |  |  |     |          |          |          |  |  |      |          |          |          |          |  |
| 1 Fe                                                                                                                                         | 0.000000                                                                                                                                                                                                                                                                                                                                                                                                                                                                                                                                                                                                                                                                                                                                                                                                                                                                                                                                                                                                                                                                                                                                                                                                                                                                                                                                                                                                                                                                                              |          |          |          |          |   |   |      |          |  |  |  |  |      |          |          |  |  |  |     |          |          |          |  |  |     |          |          |          |          |  |     |          |          |          |          |          |     |          |          |          |          |          |     |          |          |          |          |          |     |          |          |          |          |          |      |          |          |          |          |          |  |   |   |   |   |  |     |          |  |  |  |  |     |          |          |  |  |  |     |          |          |          |  |  |      |          |          |          |          |  |
| 2 P                                                                                                                                          | 2.769661                                                                                                                                                                                                                                                                                                                                                                                                                                                                                                                                                                                                                                                                                                                                                                                                                                                                                                                                                                                                                                                                                                                                                                                                                                                                                                                                                                                                                                                                                              | 0.000000 |          |          |          |   |   |      |          |  |  |  |  |      |          |          |  |  |  |     |          |          |          |  |  |     |          |          |          |          |  |     |          |          |          |          |          |     |          |          |          |          |          |     |          |          |          |          |          |     |          |          |          |          |          |      |          |          |          |          |          |  |   |   |   |   |  |     |          |  |  |  |  |     |          |          |  |  |  |     |          |          |          |  |  |      |          |          |          |          |  |
| 3 B                                                                                                                                          | 2.865375                                                                                                                                                                                                                                                                                                                                                                                                                                                                                                                                                                                                                                                                                                                                                                                                                                                                                                                                                                                                                                                                                                                                                                                                                                                                                                                                                                                                                                                                                              | 2.027203 | 0.000000 |          |          |   |   |      |          |  |  |  |  |      |          |          |  |  |  |     |          |          |          |  |  |     |          |          |          |          |  |     |          |          |          |          |          |     |          |          |          |          |          |     |          |          |          |          |          |     |          |          |          |          |          |      |          |          |          |          |          |  |   |   |   |   |  |     |          |  |  |  |  |     |          |          |  |  |  |     |          |          |          |  |  |      |          |          |          |          |  |
| 4 C                                                                                                                                          | 1.937395                                                                                                                                                                                                                                                                                                                                                                                                                                                                                                                                                                                                                                                                                                                                                                                                                                                                                                                                                                                                                                                                                                                                                                                                                                                                                                                                                                                                                                                                                              | 2.792823 | 1.608836 | 0.000000 |          |   |   |      |          |  |  |  |  |      |          |          |  |  |  |     |          |          |          |  |  |     |          |          |          |          |  |     |          |          |          |          |          |     |          |          |          |          |          |     |          |          |          |          |          |     |          |          |          |          |          |      |          |          |          |          |          |  |   |   |   |   |  |     |          |  |  |  |  |     |          |          |  |  |  |     |          |          |          |  |  |      |          |          |          |          |  |
| 5 B                                                                                                                                          | 2.003177                                                                                                                                                                                                                                                                                                                                                                                                                                                                                                                                                                                                                                                                                                                                                                                                                                                                                                                                                                                                                                                                                                                                                                                                                                                                                                                                                                                                                                                                                              | 2.938399 | 2.921652 | 2.861099 | 0.000000 |   |   |      |          |  |  |  |  |      |          |          |  |  |  |     |          |          |          |  |  |     |          |          |          |          |  |     |          |          |          |          |          |     |          |          |          |          |          |     |          |          |          |          |          |     |          |          |          |          |          |      |          |          |          |          |          |  |   |   |   |   |  |     |          |  |  |  |  |     |          |          |  |  |  |     |          |          |          |  |  |      |          |          |          |          |  |
| 6 B                                                                                                                                          | 2.151843                                                                                                                                                                                                                                                                                                                                                                                                                                                                                                                                                                                                                                                                                                                                                                                                                                                                                                                                                                                                                                                                                                                                                                                                                                                                                                                                                                                                                                                                                              | 2.989286 | 1.808930 | 1.601307 | 1.729842 |   |   |      |          |  |  |  |  |      |          |          |  |  |  |     |          |          |          |  |  |     |          |          |          |          |  |     |          |          |          |          |          |     |          |          |          |          |          |     |          |          |          |          |          |     |          |          |          |          |          |      |          |          |          |          |          |  |   |   |   |   |  |     |          |  |  |  |  |     |          |          |  |  |  |     |          |          |          |  |  |      |          |          |          |          |  |
| 7 B                                                                                                                                          | 2.864021                                                                                                                                                                                                                                                                                                                                                                                                                                                                                                                                                                                                                                                                                                                                                                                                                                                                                                                                                                                                                                                                                                                                                                                                                                                                                                                                                                                                                                                                                              | 2.031478 | 1.845908 | 2.760832 | 1.735885 |   |   |      |          |  |  |  |  |      |          |          |  |  |  |     |          |          |          |  |  |     |          |          |          |          |  |     |          |          |          |          |          |     |          |          |          |          |          |     |          |          |          |          |          |     |          |          |          |          |          |      |          |          |          |          |          |  |   |   |   |   |  |     |          |  |  |  |  |     |          |          |  |  |  |     |          |          |          |  |  |      |          |          |          |          |  |
| 8 B                                                                                                                                          | 2.237481                                                                                                                                                                                                                                                                                                                                                                                                                                                                                                                                                                                                                                                                                                                                                                                                                                                                                                                                                                                                                                                                                                                                                                                                                                                                                                                                                                                                                                                                                              | 1.852442 | 2.981903 | 3.265039 | 1.656968 |   |   |      |          |  |  |  |  |      |          |          |  |  |  |     |          |          |          |  |  |     |          |          |          |          |  |     |          |          |          |          |          |     |          |          |          |          |          |     |          |          |          |          |          |     |          |          |          |          |          |      |          |          |          |          |          |  |   |   |   |   |  |     |          |  |  |  |  |     |          |          |  |  |  |     |          |          |          |  |  |      |          |          |          |          |  |
| 9 B                                                                                                                                          | 2.167234                                                                                                                                                                                                                                                                                                                                                                                                                                                                                                                                                                                                                                                                                                                                                                                                                                                                                                                                                                                                                                                                                                                                                                                                                                                                                                                                                                                                                                                                                              | 1.879278 | 1.869317 | 1.551802 | 3.374504 |   |   |      |          |  |  |  |  |      |          |          |  |  |  |     |          |          |          |  |  |     |          |          |          |          |  |     |          |          |          |          |          |     |          |          |          |          |          |     |          |          |          |          |          |     |          |          |          |          |          |      |          |          |          |          |          |  |   |   |   |   |  |     |          |  |  |  |  |     |          |          |  |  |  |     |          |          |          |  |  |      |          |          |          |          |  |
|                                                                                                                                              | 6                                                                                                                                                                                                                                                                                                                                                                                                                                                                                                                                                                                                                                                                                                                                                                                                                                                                                                                                                                                                                                                                                                                                                                                                                                                                                                                                                                                                                                                                                                     | 7        | 8        | 9        |          |   |   |      |          |  |  |  |  |      |          |          |  |  |  |     |          |          |          |  |  |     |          |          |          |          |  |     |          |          |          |          |          |     |          |          |          |          |          |     |          |          |          |          |          |     |          |          |          |          |          |      |          |          |          |          |          |  |   |   |   |   |  |     |          |  |  |  |  |     |          |          |  |  |  |     |          |          |          |  |  |      |          |          |          |          |  |
| 6 B                                                                                                                                          | 0.000000                                                                                                                                                                                                                                                                                                                                                                                                                                                                                                                                                                                                                                                                                                                                                                                                                                                                                                                                                                                                                                                                                                                                                                                                                                                                                                                                                                                                                                                                                              |          |          |          |          |   |   |      |          |  |  |  |  |      |          |          |  |  |  |     |          |          |          |  |  |     |          |          |          |          |  |     |          |          |          |          |          |     |          |          |          |          |          |     |          |          |          |          |          |     |          |          |          |          |          |      |          |          |          |          |          |  |   |   |   |   |  |     |          |  |  |  |  |     |          |          |  |  |  |     |          |          |          |  |  |      |          |          |          |          |  |
| 7 B                                                                                                                                          | 1.818718                                                                                                                                                                                                                                                                                                                                                                                                                                                                                                                                                                                                                                                                                                                                                                                                                                                                                                                                                                                                                                                                                                                                                                                                                                                                                                                                                                                                                                                                                              | 0.000000 |          |          |          |   |   |      |          |  |  |  |  |      |          |          |  |  |  |     |          |          |          |  |  |     |          |          |          |          |  |     |          |          |          |          |          |     |          |          |          |          |          |     |          |          |          |          |          |     |          |          |          |          |          |      |          |          |          |          |          |  |   |   |   |   |  |     |          |  |  |  |  |     |          |          |  |  |  |     |          |          |          |  |  |      |          |          |          |          |  |
| 8 B                                                                                                                                          | 2.770066                                                                                                                                                                                                                                                                                                                                                                                                                                                                                                                                                                                                                                                                                                                                                                                                                                                                                                                                                                                                                                                                                                                                                                                                                                                                                                                                                                                                                                                                                              | 1.843393 | 0.000000 |          |          |   |   |      |          |  |  |  |  |      |          |          |  |  |  |     |          |          |          |  |  |     |          |          |          |          |  |     |          |          |          |          |          |     |          |          |          |          |          |     |          |          |          |          |          |     |          |          |          |          |          |      |          |          |          |          |          |  |   |   |   |   |  |     |          |  |  |  |  |     |          |          |  |  |  |     |          |          |          |  |  |      |          |          |          |          |  |
| 9 B                                                                                                                                          | 2.727512                                                                                                                                                                                                                                                                                                                                                                                                                                                                                                                                                                                                                                                                                                                                                                                                                                                                                                                                                                                                                                                                                                                                                                                                                                                                                                                                                                                                                                                                                              | 2.986085 | 2.957947 | 0.000000 |          |   |   |      |          |  |  |  |  |      |          |          |  |  |  |     |          |          |          |  |  |     |          |          |          |          |  |     |          |          |          |          |          |     |          |          |          |          |          |     |          |          |          |          |          |     |          |          |          |          |          |      |          |          |          |          |          |  |   |   |   |   |  |     |          |  |  |  |  |     |          |          |  |  |  |     |          |          |          |  |  |      |          |          |          |          |  |

| 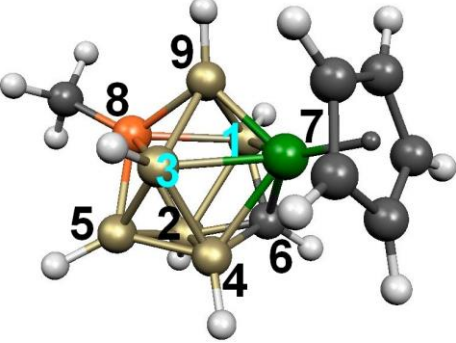 <p>7. -2029.6587869 +15.0<br/>C<sub>1</sub> H/L 1.95</p>   | <table border="1"> <thead> <tr> <th></th> <th>1</th> <th>2</th> <th>3</th> <th>4</th> <th>5</th> </tr> </thead> <tbody> <tr><td>1 B</td><td>0.000000</td><td></td><td></td><td></td><td></td></tr> <tr><td>2 B</td><td>2.083666</td><td>0.000000</td><td></td><td></td><td></td></tr> <tr><td>3 B</td><td>2.755034</td><td>2.732728</td><td>0.000000</td><td></td><td></td></tr> <tr><td>4 B</td><td>2.634184</td><td>1.791540</td><td>1.854267</td><td>0.000000</td><td></td></tr> <tr><td>5 B</td><td>3.023311</td><td>1.724312</td><td>1.781485</td><td>1.717172</td><td>0.000000</td></tr> <tr><td>6 C</td><td>1.578742</td><td>1.589355</td><td>2.792223</td><td>1.627533</td><td>2.728414</td></tr> <tr><td>7 Fe</td><td>2.097874</td><td>3.044935</td><td>2.073429</td><td>2.087156</td><td>3.222705</td></tr> <tr><td>8 P</td><td>2.110547</td><td>2.140354</td><td>2.039446</td><td>2.787817</td><td>1.885681</td></tr> <tr><td>9 B</td><td>1.806983</td><td>3.116332</td><td>1.876233</td><td>2.966307</td><td>3.027840</td></tr> <tr> <th></th> <th>6</th> <th>7</th> <th>8</th> <th>9</th> <th></th> </tr> <tr><td>6 C</td><td>0.000000</td><td></td><td></td><td></td><td></td></tr> <tr><td>7 Fe</td><td>1.949875</td><td>0.000000</td><td></td><td></td><td></td></tr> <tr><td>8 P</td><td>2.886719</td><td>3.107610</td><td>0.000000</td><td></td><td></td></tr> <tr><td>9 B</td><td>2.823857</td><td>1.937210</td><td>1.871728</td><td>0.000000</td><td></td></tr> </tbody> </table> |          | 1        | 2        | 3        | 4 | 5 | 1 B  | 0.000000 |  |  |  |  | 2 B | 2.083666 | 0.000000 |  |  |  | 3 B | 2.755034 | 2.732728 | 0.000000 |  |  | 4 B | 2.634184 | 1.791540 | 1.854267 | 0.000000 |  | 5 B | 3.023311 | 1.724312 | 1.781485 | 1.717172 | 0.000000 | 6 C | 1.578742 | 1.589355 | 2.792223 | 1.627533 | 2.728414 | 7 Fe | 2.097874 | 3.044935 | 2.073429 | 2.087156 | 3.222705 | 8 P | 2.110547 | 2.140354 | 2.039446 | 2.787817 | 1.885681 | 9 B | 1.806983 | 3.116332 | 1.876233 | 2.966307 | 3.027840 |  | 6 | 7 | 8 | 9 |  | 6 C | 0.000000 |  |  |  |  | 7 Fe | 1.949875 | 0.000000 |  |  |  | 8 P | 2.886719 | 3.107610 | 0.000000 |  |  | 9 B | 2.823857 | 1.937210 | 1.871728 | 0.000000 |  |
|----------------------------------------------------------------------------------------------------------------------------------------------|-------------------------------------------------------------------------------------------------------------------------------------------------------------------------------------------------------------------------------------------------------------------------------------------------------------------------------------------------------------------------------------------------------------------------------------------------------------------------------------------------------------------------------------------------------------------------------------------------------------------------------------------------------------------------------------------------------------------------------------------------------------------------------------------------------------------------------------------------------------------------------------------------------------------------------------------------------------------------------------------------------------------------------------------------------------------------------------------------------------------------------------------------------------------------------------------------------------------------------------------------------------------------------------------------------------------------------------------------------------------------------------------------------------------------------------------------------------------------------------------------------|----------|----------|----------|----------|---|---|------|----------|--|--|--|--|-----|----------|----------|--|--|--|-----|----------|----------|----------|--|--|-----|----------|----------|----------|----------|--|-----|----------|----------|----------|----------|----------|-----|----------|----------|----------|----------|----------|------|----------|----------|----------|----------|----------|-----|----------|----------|----------|----------|----------|-----|----------|----------|----------|----------|----------|--|---|---|---|---|--|-----|----------|--|--|--|--|------|----------|----------|--|--|--|-----|----------|----------|----------|--|--|-----|----------|----------|----------|----------|--|
|                                                                                                                                              | 1                                                                                                                                                                                                                                                                                                                                                                                                                                                                                                                                                                                                                                                                                                                                                                                                                                                                                                                                                                                                                                                                                                                                                                                                                                                                                                                                                                                                                                                                                                     | 2        | 3        | 4        | 5        |   |   |      |          |  |  |  |  |     |          |          |  |  |  |     |          |          |          |  |  |     |          |          |          |          |  |     |          |          |          |          |          |     |          |          |          |          |          |      |          |          |          |          |          |     |          |          |          |          |          |     |          |          |          |          |          |  |   |   |   |   |  |     |          |  |  |  |  |      |          |          |  |  |  |     |          |          |          |  |  |     |          |          |          |          |  |
| 1 B                                                                                                                                          | 0.000000                                                                                                                                                                                                                                                                                                                                                                                                                                                                                                                                                                                                                                                                                                                                                                                                                                                                                                                                                                                                                                                                                                                                                                                                                                                                                                                                                                                                                                                                                              |          |          |          |          |   |   |      |          |  |  |  |  |     |          |          |  |  |  |     |          |          |          |  |  |     |          |          |          |          |  |     |          |          |          |          |          |     |          |          |          |          |          |      |          |          |          |          |          |     |          |          |          |          |          |     |          |          |          |          |          |  |   |   |   |   |  |     |          |  |  |  |  |      |          |          |  |  |  |     |          |          |          |  |  |     |          |          |          |          |  |
| 2 B                                                                                                                                          | 2.083666                                                                                                                                                                                                                                                                                                                                                                                                                                                                                                                                                                                                                                                                                                                                                                                                                                                                                                                                                                                                                                                                                                                                                                                                                                                                                                                                                                                                                                                                                              | 0.000000 |          |          |          |   |   |      |          |  |  |  |  |     |          |          |  |  |  |     |          |          |          |  |  |     |          |          |          |          |  |     |          |          |          |          |          |     |          |          |          |          |          |      |          |          |          |          |          |     |          |          |          |          |          |     |          |          |          |          |          |  |   |   |   |   |  |     |          |  |  |  |  |      |          |          |  |  |  |     |          |          |          |  |  |     |          |          |          |          |  |
| 3 B                                                                                                                                          | 2.755034                                                                                                                                                                                                                                                                                                                                                                                                                                                                                                                                                                                                                                                                                                                                                                                                                                                                                                                                                                                                                                                                                                                                                                                                                                                                                                                                                                                                                                                                                              | 2.732728 | 0.000000 |          |          |   |   |      |          |  |  |  |  |     |          |          |  |  |  |     |          |          |          |  |  |     |          |          |          |          |  |     |          |          |          |          |          |     |          |          |          |          |          |      |          |          |          |          |          |     |          |          |          |          |          |     |          |          |          |          |          |  |   |   |   |   |  |     |          |  |  |  |  |      |          |          |  |  |  |     |          |          |          |  |  |     |          |          |          |          |  |
| 4 B                                                                                                                                          | 2.634184                                                                                                                                                                                                                                                                                                                                                                                                                                                                                                                                                                                                                                                                                                                                                                                                                                                                                                                                                                                                                                                                                                                                                                                                                                                                                                                                                                                                                                                                                              | 1.791540 | 1.854267 | 0.000000 |          |   |   |      |          |  |  |  |  |     |          |          |  |  |  |     |          |          |          |  |  |     |          |          |          |          |  |     |          |          |          |          |          |     |          |          |          |          |          |      |          |          |          |          |          |     |          |          |          |          |          |     |          |          |          |          |          |  |   |   |   |   |  |     |          |  |  |  |  |      |          |          |  |  |  |     |          |          |          |  |  |     |          |          |          |          |  |
| 5 B                                                                                                                                          | 3.023311                                                                                                                                                                                                                                                                                                                                                                                                                                                                                                                                                                                                                                                                                                                                                                                                                                                                                                                                                                                                                                                                                                                                                                                                                                                                                                                                                                                                                                                                                              | 1.724312 | 1.781485 | 1.717172 | 0.000000 |   |   |      |          |  |  |  |  |     |          |          |  |  |  |     |          |          |          |  |  |     |          |          |          |          |  |     |          |          |          |          |          |     |          |          |          |          |          |      |          |          |          |          |          |     |          |          |          |          |          |     |          |          |          |          |          |  |   |   |   |   |  |     |          |  |  |  |  |      |          |          |  |  |  |     |          |          |          |  |  |     |          |          |          |          |  |
| 6 C                                                                                                                                          | 1.578742                                                                                                                                                                                                                                                                                                                                                                                                                                                                                                                                                                                                                                                                                                                                                                                                                                                                                                                                                                                                                                                                                                                                                                                                                                                                                                                                                                                                                                                                                              | 1.589355 | 2.792223 | 1.627533 | 2.728414 |   |   |      |          |  |  |  |  |     |          |          |  |  |  |     |          |          |          |  |  |     |          |          |          |          |  |     |          |          |          |          |          |     |          |          |          |          |          |      |          |          |          |          |          |     |          |          |          |          |          |     |          |          |          |          |          |  |   |   |   |   |  |     |          |  |  |  |  |      |          |          |  |  |  |     |          |          |          |  |  |     |          |          |          |          |  |
| 7 Fe                                                                                                                                         | 2.097874                                                                                                                                                                                                                                                                                                                                                                                                                                                                                                                                                                                                                                                                                                                                                                                                                                                                                                                                                                                                                                                                                                                                                                                                                                                                                                                                                                                                                                                                                              | 3.044935 | 2.073429 | 2.087156 | 3.222705 |   |   |      |          |  |  |  |  |     |          |          |  |  |  |     |          |          |          |  |  |     |          |          |          |          |  |     |          |          |          |          |          |     |          |          |          |          |          |      |          |          |          |          |          |     |          |          |          |          |          |     |          |          |          |          |          |  |   |   |   |   |  |     |          |  |  |  |  |      |          |          |  |  |  |     |          |          |          |  |  |     |          |          |          |          |  |
| 8 P                                                                                                                                          | 2.110547                                                                                                                                                                                                                                                                                                                                                                                                                                                                                                                                                                                                                                                                                                                                                                                                                                                                                                                                                                                                                                                                                                                                                                                                                                                                                                                                                                                                                                                                                              | 2.140354 | 2.039446 | 2.787817 | 1.885681 |   |   |      |          |  |  |  |  |     |          |          |  |  |  |     |          |          |          |  |  |     |          |          |          |          |  |     |          |          |          |          |          |     |          |          |          |          |          |      |          |          |          |          |          |     |          |          |          |          |          |     |          |          |          |          |          |  |   |   |   |   |  |     |          |  |  |  |  |      |          |          |  |  |  |     |          |          |          |  |  |     |          |          |          |          |  |
| 9 B                                                                                                                                          | 1.806983                                                                                                                                                                                                                                                                                                                                                                                                                                                                                                                                                                                                                                                                                                                                                                                                                                                                                                                                                                                                                                                                                                                                                                                                                                                                                                                                                                                                                                                                                              | 3.116332 | 1.876233 | 2.966307 | 3.027840 |   |   |      |          |  |  |  |  |     |          |          |  |  |  |     |          |          |          |  |  |     |          |          |          |          |  |     |          |          |          |          |          |     |          |          |          |          |          |      |          |          |          |          |          |     |          |          |          |          |          |     |          |          |          |          |          |  |   |   |   |   |  |     |          |  |  |  |  |      |          |          |  |  |  |     |          |          |          |  |  |     |          |          |          |          |  |
|                                                                                                                                              | 6                                                                                                                                                                                                                                                                                                                                                                                                                                                                                                                                                                                                                                                                                                                                                                                                                                                                                                                                                                                                                                                                                                                                                                                                                                                                                                                                                                                                                                                                                                     | 7        | 8        | 9        |          |   |   |      |          |  |  |  |  |     |          |          |  |  |  |     |          |          |          |  |  |     |          |          |          |          |  |     |          |          |          |          |          |     |          |          |          |          |          |      |          |          |          |          |          |     |          |          |          |          |          |     |          |          |          |          |          |  |   |   |   |   |  |     |          |  |  |  |  |      |          |          |  |  |  |     |          |          |          |  |  |     |          |          |          |          |  |
| 6 C                                                                                                                                          | 0.000000                                                                                                                                                                                                                                                                                                                                                                                                                                                                                                                                                                                                                                                                                                                                                                                                                                                                                                                                                                                                                                                                                                                                                                                                                                                                                                                                                                                                                                                                                              |          |          |          |          |   |   |      |          |  |  |  |  |     |          |          |  |  |  |     |          |          |          |  |  |     |          |          |          |          |  |     |          |          |          |          |          |     |          |          |          |          |          |      |          |          |          |          |          |     |          |          |          |          |          |     |          |          |          |          |          |  |   |   |   |   |  |     |          |  |  |  |  |      |          |          |  |  |  |     |          |          |          |  |  |     |          |          |          |          |  |
| 7 Fe                                                                                                                                         | 1.949875                                                                                                                                                                                                                                                                                                                                                                                                                                                                                                                                                                                                                                                                                                                                                                                                                                                                                                                                                                                                                                                                                                                                                                                                                                                                                                                                                                                                                                                                                              | 0.000000 |          |          |          |   |   |      |          |  |  |  |  |     |          |          |  |  |  |     |          |          |          |  |  |     |          |          |          |          |  |     |          |          |          |          |          |     |          |          |          |          |          |      |          |          |          |          |          |     |          |          |          |          |          |     |          |          |          |          |          |  |   |   |   |   |  |     |          |  |  |  |  |      |          |          |  |  |  |     |          |          |          |  |  |     |          |          |          |          |  |
| 8 P                                                                                                                                          | 2.886719                                                                                                                                                                                                                                                                                                                                                                                                                                                                                                                                                                                                                                                                                                                                                                                                                                                                                                                                                                                                                                                                                                                                                                                                                                                                                                                                                                                                                                                                                              | 3.107610 | 0.000000 |          |          |   |   |      |          |  |  |  |  |     |          |          |  |  |  |     |          |          |          |  |  |     |          |          |          |          |  |     |          |          |          |          |          |     |          |          |          |          |          |      |          |          |          |          |          |     |          |          |          |          |          |     |          |          |          |          |          |  |   |   |   |   |  |     |          |  |  |  |  |      |          |          |  |  |  |     |          |          |          |  |  |     |          |          |          |          |  |
| 9 B                                                                                                                                          | 2.823857                                                                                                                                                                                                                                                                                                                                                                                                                                                                                                                                                                                                                                                                                                                                                                                                                                                                                                                                                                                                                                                                                                                                                                                                                                                                                                                                                                                                                                                                                              | 1.937210 | 1.871728 | 0.000000 |          |   |   |      |          |  |  |  |  |     |          |          |  |  |  |     |          |          |          |  |  |     |          |          |          |          |  |     |          |          |          |          |          |     |          |          |          |          |          |      |          |          |          |          |          |     |          |          |          |          |          |     |          |          |          |          |          |  |   |   |   |   |  |     |          |  |  |  |  |      |          |          |  |  |  |     |          |          |          |  |  |     |          |          |          |          |  |
|  <p>8. -2029.6541348 +17.9<br/>C<sub>1</sub> H/L 1.34</p>  | <table border="1"> <thead> <tr> <th></th> <th>1</th> <th>2</th> <th>3</th> <th>4</th> <th>5</th> </tr> </thead> <tbody> <tr><td>1 B</td><td>0.000000</td><td></td><td></td><td></td><td></td></tr> <tr><td>2 C</td><td>1.567105</td><td>0.000000</td><td></td><td></td><td></td></tr> <tr><td>3 B</td><td>2.765007</td><td>2.728755</td><td>0.000000</td><td></td><td></td></tr> <tr><td>4 B</td><td>2.680668</td><td>1.614730</td><td>1.847560</td><td>0.000000</td><td></td></tr> <tr><td>5 B</td><td>2.148737</td><td>1.589338</td><td>2.695004</td><td>1.783458</td><td>0.000000</td></tr> <tr><td>6 B</td><td>1.787013</td><td>1.653021</td><td>1.825775</td><td>1.851965</td><td>2.670232</td></tr> <tr><td>7 Fe</td><td>2.021733</td><td>3.114682</td><td>2.171310</td><td>3.357093</td><td>3.427636</td></tr> <tr><td>8 B</td><td>3.096414</td><td>2.701759</td><td>1.753558</td><td>1.693527</td><td>1.721613</td></tr> <tr><td>9 P</td><td>2.228332</td><td>2.907624</td><td>2.022051</td><td>2.826998</td><td>2.175228</td></tr> <tr> <th></th> <th>6</th> <th>7</th> <th>8</th> <th>9</th> <th></th> </tr> <tr><td>6 B</td><td>0.000000</td><td></td><td></td><td></td><td></td></tr> <tr><td>7 Fe</td><td>2.061468</td><td>0.000000</td><td></td><td></td><td></td></tr> <tr><td>8 B</td><td>2.867408</td><td>3.347773</td><td>0.000000</td><td></td><td></td></tr> <tr><td>9 P</td><td>2.776662</td><td>2.057701</td><td>1.913757</td><td>0.000000</td><td></td></tr> </tbody> </table> |          | 1        | 2        | 3        | 4 | 5 | 1 B  | 0.000000 |  |  |  |  | 2 C | 1.567105 | 0.000000 |  |  |  | 3 B | 2.765007 | 2.728755 | 0.000000 |  |  | 4 B | 2.680668 | 1.614730 | 1.847560 | 0.000000 |  | 5 B | 2.148737 | 1.589338 | 2.695004 | 1.783458 | 0.000000 | 6 B | 1.787013 | 1.653021 | 1.825775 | 1.851965 | 2.670232 | 7 Fe | 2.021733 | 3.114682 | 2.171310 | 3.357093 | 3.427636 | 8 B | 3.096414 | 2.701759 | 1.753558 | 1.693527 | 1.721613 | 9 P | 2.228332 | 2.907624 | 2.022051 | 2.826998 | 2.175228 |  | 6 | 7 | 8 | 9 |  | 6 B | 0.000000 |  |  |  |  | 7 Fe | 2.061468 | 0.000000 |  |  |  | 8 B | 2.867408 | 3.347773 | 0.000000 |  |  | 9 P | 2.776662 | 2.057701 | 1.913757 | 0.000000 |  |
|                                                                                                                                              | 1                                                                                                                                                                                                                                                                                                                                                                                                                                                                                                                                                                                                                                                                                                                                                                                                                                                                                                                                                                                                                                                                                                                                                                                                                                                                                                                                                                                                                                                                                                     | 2        | 3        | 4        | 5        |   |   |      |          |  |  |  |  |     |          |          |  |  |  |     |          |          |          |  |  |     |          |          |          |          |  |     |          |          |          |          |          |     |          |          |          |          |          |      |          |          |          |          |          |     |          |          |          |          |          |     |          |          |          |          |          |  |   |   |   |   |  |     |          |  |  |  |  |      |          |          |  |  |  |     |          |          |          |  |  |     |          |          |          |          |  |
| 1 B                                                                                                                                          | 0.000000                                                                                                                                                                                                                                                                                                                                                                                                                                                                                                                                                                                                                                                                                                                                                                                                                                                                                                                                                                                                                                                                                                                                                                                                                                                                                                                                                                                                                                                                                              |          |          |          |          |   |   |      |          |  |  |  |  |     |          |          |  |  |  |     |          |          |          |  |  |     |          |          |          |          |  |     |          |          |          |          |          |     |          |          |          |          |          |      |          |          |          |          |          |     |          |          |          |          |          |     |          |          |          |          |          |  |   |   |   |   |  |     |          |  |  |  |  |      |          |          |  |  |  |     |          |          |          |  |  |     |          |          |          |          |  |
| 2 C                                                                                                                                          | 1.567105                                                                                                                                                                                                                                                                                                                                                                                                                                                                                                                                                                                                                                                                                                                                                                                                                                                                                                                                                                                                                                                                                                                                                                                                                                                                                                                                                                                                                                                                                              | 0.000000 |          |          |          |   |   |      |          |  |  |  |  |     |          |          |  |  |  |     |          |          |          |  |  |     |          |          |          |          |  |     |          |          |          |          |          |     |          |          |          |          |          |      |          |          |          |          |          |     |          |          |          |          |          |     |          |          |          |          |          |  |   |   |   |   |  |     |          |  |  |  |  |      |          |          |  |  |  |     |          |          |          |  |  |     |          |          |          |          |  |
| 3 B                                                                                                                                          | 2.765007                                                                                                                                                                                                                                                                                                                                                                                                                                                                                                                                                                                                                                                                                                                                                                                                                                                                                                                                                                                                                                                                                                                                                                                                                                                                                                                                                                                                                                                                                              | 2.728755 | 0.000000 |          |          |   |   |      |          |  |  |  |  |     |          |          |  |  |  |     |          |          |          |  |  |     |          |          |          |          |  |     |          |          |          |          |          |     |          |          |          |          |          |      |          |          |          |          |          |     |          |          |          |          |          |     |          |          |          |          |          |  |   |   |   |   |  |     |          |  |  |  |  |      |          |          |  |  |  |     |          |          |          |  |  |     |          |          |          |          |  |
| 4 B                                                                                                                                          | 2.680668                                                                                                                                                                                                                                                                                                                                                                                                                                                                                                                                                                                                                                                                                                                                                                                                                                                                                                                                                                                                                                                                                                                                                                                                                                                                                                                                                                                                                                                                                              | 1.614730 | 1.847560 | 0.000000 |          |   |   |      |          |  |  |  |  |     |          |          |  |  |  |     |          |          |          |  |  |     |          |          |          |          |  |     |          |          |          |          |          |     |          |          |          |          |          |      |          |          |          |          |          |     |          |          |          |          |          |     |          |          |          |          |          |  |   |   |   |   |  |     |          |  |  |  |  |      |          |          |  |  |  |     |          |          |          |  |  |     |          |          |          |          |  |
| 5 B                                                                                                                                          | 2.148737                                                                                                                                                                                                                                                                                                                                                                                                                                                                                                                                                                                                                                                                                                                                                                                                                                                                                                                                                                                                                                                                                                                                                                                                                                                                                                                                                                                                                                                                                              | 1.589338 | 2.695004 | 1.783458 | 0.000000 |   |   |      |          |  |  |  |  |     |          |          |  |  |  |     |          |          |          |  |  |     |          |          |          |          |  |     |          |          |          |          |          |     |          |          |          |          |          |      |          |          |          |          |          |     |          |          |          |          |          |     |          |          |          |          |          |  |   |   |   |   |  |     |          |  |  |  |  |      |          |          |  |  |  |     |          |          |          |  |  |     |          |          |          |          |  |
| 6 B                                                                                                                                          | 1.787013                                                                                                                                                                                                                                                                                                                                                                                                                                                                                                                                                                                                                                                                                                                                                                                                                                                                                                                                                                                                                                                                                                                                                                                                                                                                                                                                                                                                                                                                                              | 1.653021 | 1.825775 | 1.851965 | 2.670232 |   |   |      |          |  |  |  |  |     |          |          |  |  |  |     |          |          |          |  |  |     |          |          |          |          |  |     |          |          |          |          |          |     |          |          |          |          |          |      |          |          |          |          |          |     |          |          |          |          |          |     |          |          |          |          |          |  |   |   |   |   |  |     |          |  |  |  |  |      |          |          |  |  |  |     |          |          |          |  |  |     |          |          |          |          |  |
| 7 Fe                                                                                                                                         | 2.021733                                                                                                                                                                                                                                                                                                                                                                                                                                                                                                                                                                                                                                                                                                                                                                                                                                                                                                                                                                                                                                                                                                                                                                                                                                                                                                                                                                                                                                                                                              | 3.114682 | 2.171310 | 3.357093 | 3.427636 |   |   |      |          |  |  |  |  |     |          |          |  |  |  |     |          |          |          |  |  |     |          |          |          |          |  |     |          |          |          |          |          |     |          |          |          |          |          |      |          |          |          |          |          |     |          |          |          |          |          |     |          |          |          |          |          |  |   |   |   |   |  |     |          |  |  |  |  |      |          |          |  |  |  |     |          |          |          |  |  |     |          |          |          |          |  |
| 8 B                                                                                                                                          | 3.096414                                                                                                                                                                                                                                                                                                                                                                                                                                                                                                                                                                                                                                                                                                                                                                                                                                                                                                                                                                                                                                                                                                                                                                                                                                                                                                                                                                                                                                                                                              | 2.701759 | 1.753558 | 1.693527 | 1.721613 |   |   |      |          |  |  |  |  |     |          |          |  |  |  |     |          |          |          |  |  |     |          |          |          |          |  |     |          |          |          |          |          |     |          |          |          |          |          |      |          |          |          |          |          |     |          |          |          |          |          |     |          |          |          |          |          |  |   |   |   |   |  |     |          |  |  |  |  |      |          |          |  |  |  |     |          |          |          |  |  |     |          |          |          |          |  |
| 9 P                                                                                                                                          | 2.228332                                                                                                                                                                                                                                                                                                                                                                                                                                                                                                                                                                                                                                                                                                                                                                                                                                                                                                                                                                                                                                                                                                                                                                                                                                                                                                                                                                                                                                                                                              | 2.907624 | 2.022051 | 2.826998 | 2.175228 |   |   |      |          |  |  |  |  |     |          |          |  |  |  |     |          |          |          |  |  |     |          |          |          |          |  |     |          |          |          |          |          |     |          |          |          |          |          |      |          |          |          |          |          |     |          |          |          |          |          |     |          |          |          |          |          |  |   |   |   |   |  |     |          |  |  |  |  |      |          |          |  |  |  |     |          |          |          |  |  |     |          |          |          |          |  |
|                                                                                                                                              | 6                                                                                                                                                                                                                                                                                                                                                                                                                                                                                                                                                                                                                                                                                                                                                                                                                                                                                                                                                                                                                                                                                                                                                                                                                                                                                                                                                                                                                                                                                                     | 7        | 8        | 9        |          |   |   |      |          |  |  |  |  |     |          |          |  |  |  |     |          |          |          |  |  |     |          |          |          |          |  |     |          |          |          |          |          |     |          |          |          |          |          |      |          |          |          |          |          |     |          |          |          |          |          |     |          |          |          |          |          |  |   |   |   |   |  |     |          |  |  |  |  |      |          |          |  |  |  |     |          |          |          |  |  |     |          |          |          |          |  |
| 6 B                                                                                                                                          | 0.000000                                                                                                                                                                                                                                                                                                                                                                                                                                                                                                                                                                                                                                                                                                                                                                                                                                                                                                                                                                                                                                                                                                                                                                                                                                                                                                                                                                                                                                                                                              |          |          |          |          |   |   |      |          |  |  |  |  |     |          |          |  |  |  |     |          |          |          |  |  |     |          |          |          |          |  |     |          |          |          |          |          |     |          |          |          |          |          |      |          |          |          |          |          |     |          |          |          |          |          |     |          |          |          |          |          |  |   |   |   |   |  |     |          |  |  |  |  |      |          |          |  |  |  |     |          |          |          |  |  |     |          |          |          |          |  |
| 7 Fe                                                                                                                                         | 2.061468                                                                                                                                                                                                                                                                                                                                                                                                                                                                                                                                                                                                                                                                                                                                                                                                                                                                                                                                                                                                                                                                                                                                                                                                                                                                                                                                                                                                                                                                                              | 0.000000 |          |          |          |   |   |      |          |  |  |  |  |     |          |          |  |  |  |     |          |          |          |  |  |     |          |          |          |          |  |     |          |          |          |          |          |     |          |          |          |          |          |      |          |          |          |          |          |     |          |          |          |          |          |     |          |          |          |          |          |  |   |   |   |   |  |     |          |  |  |  |  |      |          |          |  |  |  |     |          |          |          |  |  |     |          |          |          |          |  |
| 8 B                                                                                                                                          | 2.867408                                                                                                                                                                                                                                                                                                                                                                                                                                                                                                                                                                                                                                                                                                                                                                                                                                                                                                                                                                                                                                                                                                                                                                                                                                                                                                                                                                                                                                                                                              | 3.347773 | 0.000000 |          |          |   |   |      |          |  |  |  |  |     |          |          |  |  |  |     |          |          |          |  |  |     |          |          |          |          |  |     |          |          |          |          |          |     |          |          |          |          |          |      |          |          |          |          |          |     |          |          |          |          |          |     |          |          |          |          |          |  |   |   |   |   |  |     |          |  |  |  |  |      |          |          |  |  |  |     |          |          |          |  |  |     |          |          |          |          |  |
| 9 P                                                                                                                                          | 2.776662                                                                                                                                                                                                                                                                                                                                                                                                                                                                                                                                                                                                                                                                                                                                                                                                                                                                                                                                                                                                                                                                                                                                                                                                                                                                                                                                                                                                                                                                                              | 2.057701 | 1.913757 | 0.000000 |          |   |   |      |          |  |  |  |  |     |          |          |  |  |  |     |          |          |          |  |  |     |          |          |          |          |  |     |          |          |          |          |          |     |          |          |          |          |          |      |          |          |          |          |          |     |          |          |          |          |          |     |          |          |          |          |          |  |   |   |   |   |  |     |          |  |  |  |  |      |          |          |  |  |  |     |          |          |          |  |  |     |          |          |          |          |  |
|  <p>9. -2029.6484866 +21.5<br/>C<sub>1</sub> H/L 1.92</p> | <table border="1"> <thead> <tr> <th></th> <th>1</th> <th>2</th> <th>3</th> <th>4</th> <th>5</th> </tr> </thead> <tbody> <tr><td>1 Fe</td><td>0.000000</td><td></td><td></td><td></td><td></td></tr> <tr><td>2 P</td><td>3.452388</td><td>0.000000</td><td></td><td></td><td></td></tr> <tr><td>3 B</td><td>1.940145</td><td>2.100980</td><td>0.000000</td><td></td><td></td></tr> <tr><td>4 B</td><td>2.105649</td><td>1.956569</td><td>1.897802</td><td>0.000000</td><td></td></tr> <tr><td>5 B</td><td>2.951369</td><td>1.995406</td><td>2.818169</td><td>1.853397</td><td>0.000000</td></tr> <tr><td>6 B</td><td>1.929702</td><td>3.165688</td><td>2.915702</td><td>1.737059</td><td>1.710938</td></tr> <tr><td>7 B</td><td>2.103764</td><td>3.118727</td><td>2.671756</td><td>2.622323</td><td>1.854333</td></tr> <tr><td>8 C</td><td>1.958134</td><td>2.799302</td><td>1.611166</td><td>2.720833</td><td>2.673077</td></tr> <tr><td>9 B</td><td>3.091571</td><td>1.953774</td><td>2.285679</td><td>2.748350</td><td>1.858904</td></tr> <tr> <th></th> <th>6</th> <th>7</th> <th>8</th> <th>9</th> <th></th> </tr> <tr><td>6 B</td><td>0.000000</td><td></td><td></td><td></td><td></td></tr> <tr><td>7 B</td><td>1.756198</td><td>0.000000</td><td></td><td></td><td></td></tr> <tr><td>8 C</td><td>2.784679</td><td>1.606012</td><td>0.000000</td><td></td><td></td></tr> <tr><td>9 B</td><td>2.941904</td><td>1.826257</td><td>1.605764</td><td>0.000000</td><td></td></tr> </tbody> </table>  |          | 1        | 2        | 3        | 4 | 5 | 1 Fe | 0.000000 |  |  |  |  | 2 P | 3.452388 | 0.000000 |  |  |  | 3 B | 1.940145 | 2.100980 | 0.000000 |  |  | 4 B | 2.105649 | 1.956569 | 1.897802 | 0.000000 |  | 5 B | 2.951369 | 1.995406 | 2.818169 | 1.853397 | 0.000000 | 6 B | 1.929702 | 3.165688 | 2.915702 | 1.737059 | 1.710938 | 7 B  | 2.103764 | 3.118727 | 2.671756 | 2.622323 | 1.854333 | 8 C | 1.958134 | 2.799302 | 1.611166 | 2.720833 | 2.673077 | 9 B | 3.091571 | 1.953774 | 2.285679 | 2.748350 | 1.858904 |  | 6 | 7 | 8 | 9 |  | 6 B | 0.000000 |  |  |  |  | 7 B  | 1.756198 | 0.000000 |  |  |  | 8 C | 2.784679 | 1.606012 | 0.000000 |  |  | 9 B | 2.941904 | 1.826257 | 1.605764 | 0.000000 |  |
|                                                                                                                                              | 1                                                                                                                                                                                                                                                                                                                                                                                                                                                                                                                                                                                                                                                                                                                                                                                                                                                                                                                                                                                                                                                                                                                                                                                                                                                                                                                                                                                                                                                                                                     | 2        | 3        | 4        | 5        |   |   |      |          |  |  |  |  |     |          |          |  |  |  |     |          |          |          |  |  |     |          |          |          |          |  |     |          |          |          |          |          |     |          |          |          |          |          |      |          |          |          |          |          |     |          |          |          |          |          |     |          |          |          |          |          |  |   |   |   |   |  |     |          |  |  |  |  |      |          |          |  |  |  |     |          |          |          |  |  |     |          |          |          |          |  |
| 1 Fe                                                                                                                                         | 0.000000                                                                                                                                                                                                                                                                                                                                                                                                                                                                                                                                                                                                                                                                                                                                                                                                                                                                                                                                                                                                                                                                                                                                                                                                                                                                                                                                                                                                                                                                                              |          |          |          |          |   |   |      |          |  |  |  |  |     |          |          |  |  |  |     |          |          |          |  |  |     |          |          |          |          |  |     |          |          |          |          |          |     |          |          |          |          |          |      |          |          |          |          |          |     |          |          |          |          |          |     |          |          |          |          |          |  |   |   |   |   |  |     |          |  |  |  |  |      |          |          |  |  |  |     |          |          |          |  |  |     |          |          |          |          |  |
| 2 P                                                                                                                                          | 3.452388                                                                                                                                                                                                                                                                                                                                                                                                                                                                                                                                                                                                                                                                                                                                                                                                                                                                                                                                                                                                                                                                                                                                                                                                                                                                                                                                                                                                                                                                                              | 0.000000 |          |          |          |   |   |      |          |  |  |  |  |     |          |          |  |  |  |     |          |          |          |  |  |     |          |          |          |          |  |     |          |          |          |          |          |     |          |          |          |          |          |      |          |          |          |          |          |     |          |          |          |          |          |     |          |          |          |          |          |  |   |   |   |   |  |     |          |  |  |  |  |      |          |          |  |  |  |     |          |          |          |  |  |     |          |          |          |          |  |
| 3 B                                                                                                                                          | 1.940145                                                                                                                                                                                                                                                                                                                                                                                                                                                                                                                                                                                                                                                                                                                                                                                                                                                                                                                                                                                                                                                                                                                                                                                                                                                                                                                                                                                                                                                                                              | 2.100980 | 0.000000 |          |          |   |   |      |          |  |  |  |  |     |          |          |  |  |  |     |          |          |          |  |  |     |          |          |          |          |  |     |          |          |          |          |          |     |          |          |          |          |          |      |          |          |          |          |          |     |          |          |          |          |          |     |          |          |          |          |          |  |   |   |   |   |  |     |          |  |  |  |  |      |          |          |  |  |  |     |          |          |          |  |  |     |          |          |          |          |  |
| 4 B                                                                                                                                          | 2.105649                                                                                                                                                                                                                                                                                                                                                                                                                                                                                                                                                                                                                                                                                                                                                                                                                                                                                                                                                                                                                                                                                                                                                                                                                                                                                                                                                                                                                                                                                              | 1.956569 | 1.897802 | 0.000000 |          |   |   |      |          |  |  |  |  |     |          |          |  |  |  |     |          |          |          |  |  |     |          |          |          |          |  |     |          |          |          |          |          |     |          |          |          |          |          |      |          |          |          |          |          |     |          |          |          |          |          |     |          |          |          |          |          |  |   |   |   |   |  |     |          |  |  |  |  |      |          |          |  |  |  |     |          |          |          |  |  |     |          |          |          |          |  |
| 5 B                                                                                                                                          | 2.951369                                                                                                                                                                                                                                                                                                                                                                                                                                                                                                                                                                                                                                                                                                                                                                                                                                                                                                                                                                                                                                                                                                                                                                                                                                                                                                                                                                                                                                                                                              | 1.995406 | 2.818169 | 1.853397 | 0.000000 |   |   |      |          |  |  |  |  |     |          |          |  |  |  |     |          |          |          |  |  |     |          |          |          |          |  |     |          |          |          |          |          |     |          |          |          |          |          |      |          |          |          |          |          |     |          |          |          |          |          |     |          |          |          |          |          |  |   |   |   |   |  |     |          |  |  |  |  |      |          |          |  |  |  |     |          |          |          |  |  |     |          |          |          |          |  |
| 6 B                                                                                                                                          | 1.929702                                                                                                                                                                                                                                                                                                                                                                                                                                                                                                                                                                                                                                                                                                                                                                                                                                                                                                                                                                                                                                                                                                                                                                                                                                                                                                                                                                                                                                                                                              | 3.165688 | 2.915702 | 1.737059 | 1.710938 |   |   |      |          |  |  |  |  |     |          |          |  |  |  |     |          |          |          |  |  |     |          |          |          |          |  |     |          |          |          |          |          |     |          |          |          |          |          |      |          |          |          |          |          |     |          |          |          |          |          |     |          |          |          |          |          |  |   |   |   |   |  |     |          |  |  |  |  |      |          |          |  |  |  |     |          |          |          |  |  |     |          |          |          |          |  |
| 7 B                                                                                                                                          | 2.103764                                                                                                                                                                                                                                                                                                                                                                                                                                                                                                                                                                                                                                                                                                                                                                                                                                                                                                                                                                                                                                                                                                                                                                                                                                                                                                                                                                                                                                                                                              | 3.118727 | 2.671756 | 2.622323 | 1.854333 |   |   |      |          |  |  |  |  |     |          |          |  |  |  |     |          |          |          |  |  |     |          |          |          |          |  |     |          |          |          |          |          |     |          |          |          |          |          |      |          |          |          |          |          |     |          |          |          |          |          |     |          |          |          |          |          |  |   |   |   |   |  |     |          |  |  |  |  |      |          |          |  |  |  |     |          |          |          |  |  |     |          |          |          |          |  |
| 8 C                                                                                                                                          | 1.958134                                                                                                                                                                                                                                                                                                                                                                                                                                                                                                                                                                                                                                                                                                                                                                                                                                                                                                                                                                                                                                                                                                                                                                                                                                                                                                                                                                                                                                                                                              | 2.799302 | 1.611166 | 2.720833 | 2.673077 |   |   |      |          |  |  |  |  |     |          |          |  |  |  |     |          |          |          |  |  |     |          |          |          |          |  |     |          |          |          |          |          |     |          |          |          |          |          |      |          |          |          |          |          |     |          |          |          |          |          |     |          |          |          |          |          |  |   |   |   |   |  |     |          |  |  |  |  |      |          |          |  |  |  |     |          |          |          |  |  |     |          |          |          |          |  |
| 9 B                                                                                                                                          | 3.091571                                                                                                                                                                                                                                                                                                                                                                                                                                                                                                                                                                                                                                                                                                                                                                                                                                                                                                                                                                                                                                                                                                                                                                                                                                                                                                                                                                                                                                                                                              | 1.953774 | 2.285679 | 2.748350 | 1.858904 |   |   |      |          |  |  |  |  |     |          |          |  |  |  |     |          |          |          |  |  |     |          |          |          |          |  |     |          |          |          |          |          |     |          |          |          |          |          |      |          |          |          |          |          |     |          |          |          |          |          |     |          |          |          |          |          |  |   |   |   |   |  |     |          |  |  |  |  |      |          |          |  |  |  |     |          |          |          |  |  |     |          |          |          |          |  |
|                                                                                                                                              | 6                                                                                                                                                                                                                                                                                                                                                                                                                                                                                                                                                                                                                                                                                                                                                                                                                                                                                                                                                                                                                                                                                                                                                                                                                                                                                                                                                                                                                                                                                                     | 7        | 8        | 9        |          |   |   |      |          |  |  |  |  |     |          |          |  |  |  |     |          |          |          |  |  |     |          |          |          |          |  |     |          |          |          |          |          |     |          |          |          |          |          |      |          |          |          |          |          |     |          |          |          |          |          |     |          |          |          |          |          |  |   |   |   |   |  |     |          |  |  |  |  |      |          |          |  |  |  |     |          |          |          |  |  |     |          |          |          |          |  |
| 6 B                                                                                                                                          | 0.000000                                                                                                                                                                                                                                                                                                                                                                                                                                                                                                                                                                                                                                                                                                                                                                                                                                                                                                                                                                                                                                                                                                                                                                                                                                                                                                                                                                                                                                                                                              |          |          |          |          |   |   |      |          |  |  |  |  |     |          |          |  |  |  |     |          |          |          |  |  |     |          |          |          |          |  |     |          |          |          |          |          |     |          |          |          |          |          |      |          |          |          |          |          |     |          |          |          |          |          |     |          |          |          |          |          |  |   |   |   |   |  |     |          |  |  |  |  |      |          |          |  |  |  |     |          |          |          |  |  |     |          |          |          |          |  |
| 7 B                                                                                                                                          | 1.756198                                                                                                                                                                                                                                                                                                                                                                                                                                                                                                                                                                                                                                                                                                                                                                                                                                                                                                                                                                                                                                                                                                                                                                                                                                                                                                                                                                                                                                                                                              | 0.000000 |          |          |          |   |   |      |          |  |  |  |  |     |          |          |  |  |  |     |          |          |          |  |  |     |          |          |          |          |  |     |          |          |          |          |          |     |          |          |          |          |          |      |          |          |          |          |          |     |          |          |          |          |          |     |          |          |          |          |          |  |   |   |   |   |  |     |          |  |  |  |  |      |          |          |  |  |  |     |          |          |          |  |  |     |          |          |          |          |  |
| 8 C                                                                                                                                          | 2.784679                                                                                                                                                                                                                                                                                                                                                                                                                                                                                                                                                                                                                                                                                                                                                                                                                                                                                                                                                                                                                                                                                                                                                                                                                                                                                                                                                                                                                                                                                              | 1.606012 | 0.000000 |          |          |   |   |      |          |  |  |  |  |     |          |          |  |  |  |     |          |          |          |  |  |     |          |          |          |          |  |     |          |          |          |          |          |     |          |          |          |          |          |      |          |          |          |          |          |     |          |          |          |          |          |     |          |          |          |          |          |  |   |   |   |   |  |     |          |  |  |  |  |      |          |          |  |  |  |     |          |          |          |  |  |     |          |          |          |          |  |
| 9 B                                                                                                                                          | 2.941904                                                                                                                                                                                                                                                                                                                                                                                                                                                                                                                                                                                                                                                                                                                                                                                                                                                                                                                                                                                                                                                                                                                                                                                                                                                                                                                                                                                                                                                                                              | 1.826257 | 1.605764 | 0.000000 |          |   |   |      |          |  |  |  |  |     |          |          |  |  |  |     |          |          |          |  |  |     |          |          |          |          |  |     |          |          |          |          |          |     |          |          |          |          |          |      |          |          |          |          |          |     |          |          |          |          |          |     |          |          |          |          |          |  |   |   |   |   |  |     |          |  |  |  |  |      |          |          |  |  |  |     |          |          |          |  |  |     |          |          |          |          |  |



Table S2C. Energy ranking for all of the CpFeCHPHB<sub>6</sub>H<sub>6</sub> optimized structures:

| No | Initial structure            | Final energy (a.u.) | $\Delta E$ (kcal/mol) |
|----|------------------------------|---------------------|-----------------------|
| 1  | 04a-TricTrPrism-Fe1C2P2      | -1990.3967438       | 0.00                  |
| 2  | 03b-Tl99-Fe2P3C3             | -1990.3967382       | 0.00                  |
| 3  | 03b-Tl99-Fe2P5C1             | -1990.3967213       | 0.01                  |
| 4  | 03a-Tl99-Fe4C4P1             | -1990.3967089       | 0.02                  |
| 5  | 03b-Tl99-Fe3P3C2             | -1990.3967005       | 0.03                  |
| 6  | 03a-Tl99-Fe3C2P3             | -1990.3966953       | 0.03                  |
| 7  | 02a-PressCapCube-Fe1C3P3     | -1990.3966915       | 0.03                  |
| 8  | 01a-CapCube-Fe3C5P3          | -1990.3966755       | 0.04                  |
| 9  | 04b-TricTrPrism-Fe2P3C1      | -1990.3966715       | 0.05                  |
| 10 | 01b-CapCube-Fe1P1C5          | -1990.3966696       | 0.05                  |
| 11 | 01b-CapCube-Fe2P4C2          | -1990.3966212       | 0.08                  |
| 12 | 03a-Tl99-Fe1C1P4             | -1990.3957140       | 0.65                  |
| 13 | 03b-Tl99-Fe4P2C1             | -1990.3957069       | 0.65                  |
| 14 | 02a-PressCapCube-Fe5C5P2     | -1990.3957056       | 0.65                  |
| 15 | 03b-Tl99-Fe4P1C1             | -1990.3957051       | 0.65                  |
| 16 | 02a-PressCapCube-Fe5C1P3     | -1990.3957039       | 0.65                  |
| 17 | 01b-CapCube-Fe3P4C2          | -1990.3956950       | 0.66                  |
| 18 | 01b-CapCube-Fe1P1C2          | -1990.3956945       | 0.66                  |
| 19 | 03a-Tl99-Fe2C4P2             | -1990.3956925       | 0.66                  |
| 20 | 03b-Tl99-Fe1P1C4             | -1990.3956911       | 0.66                  |
| 21 | 03b-Tl99-Fe2P1C1             | -1990.3956836       | 0.67                  |
| 22 | 04b-TricTrPrism-Fe2P1C2      | -1990.3956836       | 0.67                  |
| 23 | 02b-PressCapCube-Fe3P1C1     | -1990.3956828       | 0.67                  |
| 24 | 02a-PressCapCube-Fe3C1P1     | -1990.3956659       | 0.68                  |
| 25 | 01a-CapCube-Fe2C5P3          | -1990.3956613       | 0.68                  |
| 26 | 02b-PressCapCube-Fe2P2C3     | -1990.3956594       | 0.68                  |
| 27 | 03a-Tl99-Fe3C6P1             | -1990.3956580       | 0.68                  |
| 28 | 01b-CapCube-Fe3P1C1          | -1990.3956534       | 0.68                  |
| 29 | 03b-Tl99-Fe3P6C1             | -1990.3956445       | 0.69                  |
| 30 | 04b-TricTrPrism-Fe2P2C1      | -1990.3956275       | 0.70                  |
| 31 | 03b-Tl99-Fe3P1C3             | -1990.3953476       | 0.88                  |
| 32 | 01a-CapCube-Fe1C1P4          | -1990.3906688       | 3.81                  |
| 33 | 01b-CapCube-Fe2P2C4          | -1990.3906632       | 3.82                  |
| 34 | 02b-PressCapCube-Fe3P2C4     | -1990.3906497       | 3.82                  |
| 35 | 01a-CapCube-Fe2C3P2          | -1990.3906463       | 3.83                  |
| 36 | 01b-CapCube-Fe1P1C4          | -1990.3906371       | 3.83                  |
| 37 | 04b-TricTrPrism-Fe2P1C1_i-17 | -1990.3906298       | 3.84                  |
| 38 | 04a-TricTrPrism-Fe2C1P1      | -1990.3906296       | 3.84                  |
| 39 | 01a-CapCube-Fe2C2P4          | -1990.3906289       | 3.84                  |

|    |                              |               |      |
|----|------------------------------|---------------|------|
| 40 | 04b-TricTrPrism-Fe2P1C1_r-17 | -1990.3906192 | 3.84 |
| 41 | 03a-Tl99-Fe4C1P3             | -1990.3906073 | 3.85 |
| 42 | 03a-Tl99-Fe1C1P3             | -1990.3905968 | 3.86 |
| 43 | 03a-Tl99-Fe2C1P3             | -1990.3905779 | 3.87 |
| 44 | 03b-Tl99-Fe1P1C3             | -1990.3904618 | 3.94 |
| 45 | 04b-TricTrPrism-Fe2P2C2      | -1990.3899013 | 4.29 |
| 46 | 04a-TricTrPrism-Fe2C2P2      | -1990.3898282 | 4.34 |
| 47 | 02b-PressCapCube-Fe5P4C1     | -1990.3898254 | 4.34 |
| 48 | 03b-Tl99-Fe2P3C2             | -1990.3898196 | 4.35 |
| 49 | 03b-Tl99-Fe4P2C2             | -1990.3898113 | 4.35 |
| 50 | 01b-CapCube-Fe3P1C5          | -1990.3898012 | 4.36 |
| 51 | 03a-Tl99-Fe2C4P1             | -1990.3897942 | 4.36 |
| 52 | 03a-Tl99-Fe2C3P2             | -1990.3897909 | 4.36 |
| 53 | 01a-CapCube-Fe2C5P2          | -1990.3897818 | 4.37 |
| 54 | 03b-Tl99-Fe2P4C1             | -1990.3897708 | 4.38 |
| 55 | 01b-CapCube-Fe3P5C2          | -1990.3897651 | 4.38 |
| 56 | 03a-Tl99-Fe4C2P2             | -1990.3897475 | 4.39 |
| 57 | 02b-PressCapCube-Fe5P6C1     | -1990.3897316 | 4.40 |
| 58 | 03a-Tl99-Fe3C1P4             | -1990.3854161 | 7.11 |
| 59 | 03b-Tl99-Fe3P1C5             | -1990.3854126 | 7.11 |
| 60 | 04a-TricTrPrism-Fe1C1P1      | -1990.3853985 | 7.12 |
| 61 | 04b-TricTrPrism-Fe1P1C1      | -1990.3853979 | 7.12 |
| 62 | 03b-Tl99-Fe3P6C2             | -1990.3853762 | 7.13 |
| 63 | 01a-CapCube-Fe3C5P2          | -1990.3853739 | 7.13 |
| 64 | 02b-PressCapCube-Fe1P1C2     | -1990.3853719 | 7.14 |
| 65 | 03b-Tl99-Fe3P1C4             | -1990.3853693 | 7.14 |
| 66 | 03a-Tl99-Fe3C1P5             | -1990.3853429 | 7.15 |
| 67 | 02a-PressCapCube-Fe1C1P2     | -1990.3853370 | 7.16 |
| 68 | 02a-PressCapCube-Fe5C6P1     | -1990.3853366 | 7.16 |
| 69 | 02a-PressCapCube-Fe2C1P3     | -1990.3842180 | 7.86 |
| 70 | 01b-CapCube-Fe3P1C2          | -1990.3842114 | 7.86 |
| 71 | 01b-CapCube-Fe3P3C3          | -1990.3842067 | 7.87 |
| 72 | 04b-TricTrPrism-Fe1P1C5      | -1990.3842058 | 7.87 |
| 73 | 04a-TricTrPrism-Fe1C2P3      | -1990.3841843 | 7.88 |
| 74 | 03b-Tl99-Fe3P3C4             | -1990.3841811 | 7.88 |
| 75 | 04a-TricTrPrism-Fe2C2P3      | -1990.3841709 | 7.89 |
| 76 | 02b-PressCapCube-Fe3P6C1     | -1990.3841699 | 7.89 |
| 77 | 03a-Tl99-Fe3C1P2             | -1990.3841641 | 7.89 |
| 78 | 03b-Tl99-Fe2P4C3             | -1990.3838095 | 8.12 |
| 79 | 01b-CapCube-Fe3P6C1          | -1990.3837756 | 8.14 |
| 80 | 03a-Tl99-Fe4C2P4             | -1990.3837579 | 8.15 |
| 81 | 03b-Tl99-Fe2P5C2             | -1990.3837533 | 8.15 |

|     |                          |               |       |
|-----|--------------------------|---------------|-------|
| 82  | 02a-PressCapCube-Fe5C5P1 | -1990.3837390 | 8.16  |
| 83  | 01a-CapCube-Fe3C6P1      | -1990.3837355 | 8.16  |
| 84  | 04b-TricTrPrism-Fe2P1C7  | -1990.3815742 | 9.52  |
| 85  | 01b-CapCube-Fe2P5C2      | -1990.3804166 | 10.25 |
| 86  | 01a-CapCube-Fe2C6P1      | -1990.3804106 | 10.25 |
| 87  | 03b-Tl99-Fe1P2C1         | -1990.3804045 | 10.25 |
| 88  | 03b-Tl99-Fe1P1C5         | -1990.3803957 | 10.26 |
| 89  | 04b-TricTrPrism-Fe2P2C3  | -1990.3803409 | 10.29 |
| 90  | 02a-PressCapCube-Fe5C3P1 | -1990.3777851 | 11.90 |
| 91  | 02a-PressCapCube-Fe2C1P2 | -1990.3762983 | 12.83 |
| 92  | 02b-PressCapCube-Fe3P5C3 | -1990.3762830 | 12.84 |
| 93  | 03b-Tl99-Fe3P1C7         | -1990.3762696 | 12.85 |
| 94  | 03b-Tl99-Fe4P2C3         | -1990.3762409 | 12.87 |
| 95  | 01a-CapCube-Fe3C1P2      | -1990.3762381 | 12.87 |
| 96  | 03a-Tl99-Fe2C3P3         | -1990.3762235 | 12.88 |
| 97  | 03a-Tl99-Fe2C2P2         | -1990.3762103 | 12.89 |
| 98  | 03a-Tl99-Fe2C5P1         | -1990.3762083 | 12.89 |
| 99  | 01b-CapCube-Fe3P2C4      | -1990.3762060 | 12.89 |
| 100 | 02b-PressCapCube-Fe3P3C2 | -1990.3761993 | 12.89 |
| 101 | 03a-Tl99-Fe3C2P2         | -1990.3761968 | 12.89 |
| 102 | 04b-TricTrPrism-Fe2P2C4  | -1990.3761931 | 12.90 |
| 103 | 01b-CapCube-Fe2P1C3      | -1990.3761851 | 12.90 |
| 104 | 03a-Tl99-Fe4C3P2         | -1990.3761816 | 12.90 |
| 105 | 01b-CapCube-Fe3P5C3      | -1990.3761634 | 12.91 |
| 106 | 02a-PressCapCube-Fe2C2P3 | -1990.3758374 | 13.12 |
| 107 | 04b-TricTrPrism-Fe1P1C6  | -1990.3758275 | 13.13 |
| 108 | 03b-Tl99-Fe3P5C2         | -1990.3758215 | 13.13 |
| 109 | 03a-Tl99-Fe3C2P5         | -1990.3758145 | 13.13 |
| 110 | 03b-Tl99-Fe3P2C2         | -1990.3758138 | 13.13 |
| 111 | 02b-PressCapCube-Fe5P1C4 | -1990.3758120 | 13.14 |
| 112 | 03a-Tl99-Fe3C1P3         | -1990.3758117 | 13.14 |
| 113 | 04b-TricTrPrism-Fe1P2C1  | -1990.3757928 | 13.15 |
| 114 | 01b-CapCube-Fe2P6C1      | -1990.3703144 | 16.58 |
| 115 | 02b-PressCapCube-Fe3P5C2 | -1990.3702964 | 16.60 |
| 116 | 02a-PressCapCube-Fe3C5P2 | -1990.3702645 | 16.62 |
| 117 | 02a-PressCapCube-Fe3C1P4 | -1990.3702437 | 16.63 |
| 118 | 03a-Tl99-Fe4C1P6         | -1990.3702429 | 16.63 |
| 119 | 01b-CapCube-Fe2P3C2      | -1990.3692594 | 17.25 |
| 120 | 03b-Tl99-Fe3P2C5         | -1990.3679823 | 18.05 |
| 121 | 03a-Tl99-Fe2C1P4         | -1990.3679353 | 18.08 |
| 122 | 03a-Tl99-Fe2C5P2         | -1990.3679340 | 18.08 |
| 123 | 04a-TricTrPrism-Fe2C1P7  | -1990.3679163 | 18.09 |

|     |                          |               |       |
|-----|--------------------------|---------------|-------|
| 124 | 01a-CapCube-Fe2C1P5      | -1990.3678242 | 18.15 |
| 125 | 01a-CapCube-Fe2C4P1      | -1990.3677821 | 18.17 |
| 126 | 02a-PressCapCube-Fe3C4P1 | -1990.3677653 | 18.18 |
| 127 | 03b-Tl99-Fe4P2C4         | -1990.3656137 | 19.53 |
| 128 | 01a-CapCube-Fe3C3P3      | -1990.3656122 | 19.54 |
| 129 | 02a-PressCapCube-Fe2C5P2 | -1990.3655571 | 19.57 |
| 130 | 03b-Tl99-Fe4P1C4_r-23    | -1990.3655493 | 19.58 |
| 131 | 03a-Tl99-Fe3C7P1         | -1990.3655255 | 19.59 |
| 132 | 02b-PressCapCube-Fe3P1C4 | -1990.3655112 | 19.60 |
| 133 | 03a-Tl99-Fe1C1P5_r-200   | -1990.3654792 | 19.62 |
| 134 | 03a-Tl99-Fe1C2P1         | -1990.3654770 | 19.62 |
| 135 | 04b-TricTrPrism-Fe2P1C4  | -1990.3654525 | 19.64 |
| 136 | 03b-Tl99-Fe4P1C4_i-23    | -1990.3650338 | 19.90 |
| 137 | 02b-PressCapCube-Fe3P4C1 | -1990.3644218 | 20.28 |
| 138 | 04a-TricTrPrism-Fe1C1P5  | -1990.3626786 | 21.38 |
| 139 | 02b-PressCapCube-Fe5P1C2 | -1990.3626570 | 21.39 |
| 140 | 02b-PressCapCube-Fe3P1C2 | -1990.3626559 | 21.39 |
| 141 | 03b-Tl99-Fe1P3C2_r-21    | -1990.3626384 | 21.40 |
| 142 | 03b-Tl99-Fe3P4C1         | -1990.3626376 | 21.40 |
| 143 | 04a-TricTrPrism-Fe2C1P3  | -1990.3626237 | 21.41 |
| 144 | 01a-CapCube-Fe2C4P2      | -1990.3626221 | 21.41 |
| 145 | 03b-Tl99-Fe1P1C7         | -1990.3626164 | 21.42 |
| 146 | 03a-Tl99-Fe2C1P2         | -1990.3626159 | 21.42 |
| 147 | 03b-Tl99-Fe4P3C3         | -1990.3625468 | 21.46 |
| 148 | 04b-TricTrPrism-Fe1P3C1  | -1990.3625222 | 21.47 |
| 149 | 02a-PressCapCube-Fe2C3P3 | -1990.3625148 | 21.48 |
| 150 | 01b-CapCube-Fe2P1C5      | -1990.3625097 | 21.48 |
| 151 | 03a-Tl99-Fe4C3P3         | -1990.3624691 | 21.51 |
| 152 | 04a-TricTrPrism-Fe1C3P1  | -1990.3624639 | 21.51 |
| 153 | 01a-CapCube-Fe3C2P2      | -1990.3624461 | 21.52 |
| 154 | 02b-PressCapCube-Fe2P3C3 | -1990.3624455 | 21.52 |
| 155 | 03a-Tl99-Fe1C2P2         | -1990.3623474 | 21.58 |
| 156 | 02b-PressCapCube-Fe1P3C3 | -1990.3623158 | 21.60 |
| 157 | 04a-TricTrPrism-Fe1C1P3  | -1990.3622940 | 21.62 |
| 158 | 03b-Tl99-Fe4P4C1         | -1990.3622630 | 21.64 |
| 159 | 03b-Tl99-Fe1P2C2         | -1990.3622624 | 21.64 |
| 160 | 03b-Tl99-Fe1P3C2_i-21    | -1990.3622596 | 21.64 |
| 161 | 03b-Tl99-Fe2P4C2         | -1990.3599954 | 23.06 |
| 162 | 03a-Tl99-Fe4C2P1         | -1990.3599635 | 23.08 |
| 163 | 03a-Tl99-Fe4C1P1         | -1990.3599290 | 23.10 |
| 164 | 04a-TricTrPrism-Fe2C1P2  | -1990.3597282 | 23.23 |
| 165 | 04a-TricTrPrism-Fe2C2P1  | -1990.3596847 | 23.26 |

|     |                               |               |       |
|-----|-------------------------------|---------------|-------|
| 166 | 03a-TI99-Fe2C1P1              | -1990.3596194 | 23.30 |
| 167 | 02b-PressCapCube-Fe3P1C5      | -1990.3585504 | 23.97 |
| 168 | 03b-TI99-Fe4P1C6              | -1990.3585181 | 23.99 |
| 169 | 01b-CapCube-Fe2P2C3           | -1990.3585167 | 23.99 |
| 170 | 03b-TI99-Fe1P1C1              | -1990.3585061 | 23.99 |
| 171 | 01b-CapCube-Fe3P5C1           | -1990.3584796 | 24.01 |
| 172 | 02b-PressCapCube-Fe5P1C5_r-18 | -1990.3584633 | 24.02 |
| 173 | 03b-TI99-Fe3P1C6              | -1990.3584570 | 24.03 |
| 174 | 01a-CapCube-Fe2C3P3           | -1990.3584547 | 24.03 |
| 175 | 01a-CapCube-Fe2C2P3           | -1990.3584514 | 24.03 |
| 176 | 01b-CapCube-Fe3P3C1           | -1990.3581219 | 24.24 |
| 177 | 03a-TI99-Fe3C3P1              | -1990.3581200 | 24.24 |
| 178 | 03a-TI99-Fe4C1P5              | -1990.3580963 | 24.25 |
| 179 | 03a-TI99-Fe1C1P2              | -1990.3580937 | 24.25 |
| 180 | 01a-CapCube-Fe2C5P1           | -1990.3580864 | 24.26 |
| 181 | 03a-TI99-Fe3C3P5              | -1990.3580855 | 24.26 |
| 182 | 04b-TricTrPrism-Fe2P1C5       | -1990.3580824 | 24.26 |
| 183 | 02b-PressCapCube-Fe5P2C2      | -1990.3580790 | 24.26 |
| 184 | 02b-PressCapCube-Fe5P1C1      | -1990.3580768 | 24.26 |
| 185 | 02b-PressCapCube-Fe5P1C5_i-18 | -1990.3580165 | 24.30 |
| 186 | 02b-PressCapCube-Fe5P1C3      | -1990.3577418 | 24.47 |
| 187 | 02b-PressCapCube-Fe2P5C2      | -1990.3577070 | 24.50 |
| 188 | 03b-TI99-Fe3P7C1              | -1990.3576902 | 24.51 |
| 189 | 01a-CapCube-Fe3C1P5           | -1990.3576449 | 24.54 |
| 190 | 01b-CapCube-Fe2P5C3           | -1990.3576260 | 24.55 |
| 191 | 04a-TricTrPrism-Fe2C1P4       | -1990.3576245 | 24.55 |
| 192 | 03a-TI99-Fe4C1P4              | -1990.3576221 | 24.55 |
| 193 | 02a-PressCapCube-Fe1C2P1      | -1990.3561698 | 25.46 |
| 194 | 04a-TricTrPrism-Fe2C2P6       | -1990.3561013 | 25.50 |
| 195 | 03a-TI99-Fe2C3P1              | -1990.3559274 | 25.61 |
| 196 | 02b-PressCapCube-Fe2P1C4      | -1990.3558937 | 25.63 |
| 197 | 03b-TI99-Fe4P2C5              | -1990.3558834 | 25.64 |
| 198 | 03a-TI99-Fe2C3P5              | -1990.3558582 | 25.66 |
| 199 | 02a-PressCapCube-Fe3C2P2      | -1990.3558285 | 25.68 |
| 200 | 03b-TI99-Fe2P3C1              | -1990.3558227 | 25.68 |
| 201 | 04b-TricTrPrism-Fe2P2C5       | -1990.3558112 | 25.69 |
| 202 | 02b-PressCapCube-Fe5P4C2      | -1990.3557998 | 25.69 |
| 203 | 02b-PressCapCube-Fe2P2C1      | -1990.3557658 | 25.71 |
| 204 | 04a-TricTrPrism-Fe2C2P4       | -1990.3553372 | 25.98 |
| 205 | 03a-TI99-Fe3C1P7              | -1990.3553371 | 25.98 |
| 206 | 02a-PressCapCube-Fe3C3P2      | -1990.3553288 | 25.99 |
| 207 | 02a-PressCapCube-Fe1C1P5      | -1990.3553202 | 25.99 |

|     |                              |               |       |
|-----|------------------------------|---------------|-------|
| 208 | 03b-Tl99-Fe2P2C2             | -1990.3553114 | 26.00 |
| 209 | 04b-TricTrPrism-Fe2P1C6      | -1990.3551464 | 26.10 |
| 210 | 02b-PressCapCube-Fe5P2C3     | -1990.3551253 | 26.12 |
| 211 | 02a-PressCapCube-Fe3C2P3     | -1990.3551112 | 26.13 |
| 212 | 01a-CapCube-Fe2C2P2          | -1990.3550696 | 26.15 |
| 213 | 01a-CapCube-Fe2C1P3_r-84     | -1990.3550630 | 26.16 |
| 214 | 03a-Tl99-Fe4C2P5             | -1990.3546394 | 26.42 |
| 215 | 03a-Tl99-Fe4C2P3             | -1990.3537082 | 27.01 |
| 216 | 02b-PressCapCube-Fe2P1C2     | -1990.3536972 | 27.01 |
| 217 | 02b-PressCapCube-Fe1P2C3     | -1990.3536962 | 27.01 |
| 218 | 03b-Tl99-Fe4P3C2             | -1990.3536539 | 27.04 |
| 219 | 02b-PressCapCube-Fe2P3C2     | -1990.3534700 | 27.16 |
| 220 | 02a-PressCapCube-Fe3C2P4     | -1990.3534674 | 27.16 |
| 221 | 04b-TricTrPrism-Fe2P4C1      | -1990.3534580 | 27.16 |
| 222 | 03b-Tl99-Fe4P3C4             | -1990.3534574 | 27.16 |
| 223 | 03b-Tl99-Fe2P3C4             | -1990.3534569 | 27.16 |
| 224 | 03a-Tl99-Fe3C2P1             | -1990.3534404 | 27.17 |
| 225 | 03b-Tl99-Fe3P4C2             | -1990.3534350 | 27.18 |
| 226 | 02a-PressCapCube-Fe1C1P4     | -1990.3533606 | 27.22 |
| 227 | 02a-PressCapCube-Fe5C3P3     | -1990.3533588 | 27.22 |
| 228 | 01b-CapCube-Fe1P1C3          | -1990.3533428 | 27.23 |
| 229 | 02b-PressCapCube-Fe1P3C1     | -1990.3533231 | 27.25 |
| 230 | 02a-PressCapCube-Fe1C2P3     | -1990.3533140 | 27.25 |
| 231 | 02a-PressCapCube-Fe2C2P4     | -1990.3533087 | 27.26 |
| 232 | 04a-TricTrPrism-Fe1C1P4_r-44 | -1990.3532948 | 27.27 |
| 233 | 02b-PressCapCube-Fe5P2C4     | -1990.3532764 | 27.28 |
| 234 | 01a-CapCube-Fe3C3P1          | -1990.3531234 | 27.37 |
| 235 | 01b-CapCube-Fe2P2C2          | -1990.3530706 | 27.41 |
| 236 | 03b-Tl99-Fe1P1C2             | -1990.3529227 | 27.50 |
| 237 | 02b-PressCapCube-Fe3P2C3     | -1990.3529083 | 27.51 |
| 238 | 04a-TricTrPrism-Fe1C1P4_i-44 | -1990.3515486 | 28.36 |
| 239 | 01b-CapCube-Fe3P2C2          | -1990.3513299 | 28.50 |
| 240 | 02a-PressCapCube-Fe3C1P2     | -1990.3513032 | 28.51 |
| 241 | 02a-PressCapCube-Fe5C1P2     | -1990.3512901 | 28.52 |
| 242 | 04b-TricTrPrism-Fe2P1C3      | -1990.3512864 | 28.53 |
| 243 | 03b-Tl99-Fe2P1C2             | -1990.3512633 | 28.54 |
| 244 | 03a-Tl99-Fe3C4P1             | -1990.3512415 | 28.55 |
| 245 | 03b-Tl99-Fe4P1C2             | -1990.3512392 | 28.56 |
| 246 | 01a-CapCube-Fe2C1P3_i-84     | -1990.3512095 | 28.57 |
| 247 | 02b-PressCapCube-Fe5P5C1     | -1990.3510123 | 28.70 |
| 248 | 02b-PressCapCube-Fe1P1C4     | -1990.3496395 | 29.56 |
| 249 | 03b-Tl99-Fe3P1C2             | -1990.3495700 | 29.60 |

|     |                               |               |       |
|-----|-------------------------------|---------------|-------|
| 250 | 02a-PressCapCube-Fe2C3P2      | -1990.3492447 | 29.81 |
| 251 | 02b-PressCapCube-Fe5P3C1      | -1990.3491018 | 29.90 |
| 252 | 03a-TI99-Fe1C2P3              | -1990.3489426 | 30.00 |
| 253 | 03a-TI99-Fe1C1P5_i-200        | -1990.3477603 | 30.74 |
| 254 | 03b-TI99-Fe4P3C1              | -1990.3473662 | 30.99 |
| 255 | 02b-PressCapCube-Fe2P5C3      | -1990.3473551 | 30.99 |
| 256 | 02a-PressCapCube-Fe5C4P1      | -1990.3465793 | 31.48 |
| 257 | 03b-TI99-Fe3P2C1              | -1990.3465493 | 31.50 |
| 258 | 03b-TI99-Fe2P3C5              | -1990.3460488 | 31.81 |
| 259 | 02a-PressCapCube-Fe5C4P2      | -1990.3460143 | 31.83 |
| 260 | 02b-PressCapCube-Fe2P4C1      | -1990.3460110 | 31.84 |
| 261 | 02b-PressCapCube-Fe1P2C2      | -1990.3456236 | 32.08 |
| 262 | 02a-PressCapCube-Fe1C2P2      | -1990.3456152 | 32.08 |
| 263 | 03b-TI99-Fe3P2C3              | -1990.3455954 | 32.10 |
| 264 | 04b-TricTrPrism-Fe1P2C2       | -1990.3455651 | 32.12 |
| 265 | 04b-TricTrPrism-Fe1P1C4       | -1990.3449044 | 32.53 |
| 266 | 02a-PressCapCube-Fe5C5P3      | -1990.3448979 | 32.53 |
| 267 | 02a-PressCapCube-Fe5C2P4      | -1990.3448872 | 32.54 |
| 268 | 01a-CapCube-Fe1C1P3           | -1990.3448605 | 32.56 |
| 269 | 03a-TI99-Fe3C4P2              | -1990.3448210 | 32.58 |
| 270 | 01b-CapCube-Fe2P2C1           | -1990.3447160 | 32.65 |
| 271 | 02a-PressCapCube-Fe2C1P1      | -1990.3446643 | 32.68 |
| 272 | 02b-PressCapCube-Fe2P1C1      | -1990.3446403 | 32.70 |
| 273 | 04a-TricTrPrism-Fe2C3P1       | -1990.3445236 | 32.77 |
| 274 | 03a-TI99-Fe3C3P2              | -1990.3444938 | 32.79 |
| 275 | 03a-TI99-Fe4C1P2              | -1990.3444449 | 32.82 |
| 276 | 01a-CapCube-Fe2C2P1           | -1990.3437236 | 33.27 |
| 277 | 03b-TI99-Fe2P2C3              | -1990.3425930 | 33.98 |
| 278 | 02b-PressCapCube-Fe5P2C1      | -1990.3425791 | 33.99 |
| 279 | 01b-CapCube-Fe1P2C1           | -1990.3425569 | 34.00 |
| 280 | 02a-PressCapCube-Fe2C3P1      | -1990.3425513 | 34.01 |
| 281 | 01b-CapCube-Fe3P2C1           | -1990.3425347 | 34.02 |
| 282 | 02b-PressCapCube-Fe3P3C3      | -1990.3424883 | 34.05 |
| 283 | 03a-TI99-Fe2C5P3              | -1990.3424703 | 34.06 |
| 284 | 03a-TI99-Fe1C3P2              | -1990.3423167 | 34.15 |
| 285 | 03a-TI99-Fe1C1P7              | -1990.3422789 | 34.18 |
| 286 | 01b-CapCube-Fe2P1C1           | -1990.3415588 | 34.63 |
| 287 | 03a-TI99-Fe4C3P5              | -1990.3412674 | 34.81 |
| 288 | 04b-TricTrPrism-Fe2P3C2       | -1990.3412531 | 34.82 |
| 289 | 02b-PressCapCube-Fe5P5C2      | -1990.3412270 | 34.84 |
| 290 | 03a-TI99-Fe2C3P4              | -1990.3412158 | 34.84 |
| 291 | 02b-PressCapCube-Fe5P3C3_r-94 | -1990.3412061 | 34.85 |

|     |                               |               |       |
|-----|-------------------------------|---------------|-------|
| 292 | 01b-CapCube-Fe3P1C3           | -1990.3411991 | 34.86 |
| 293 | 04a-TricTrPrism-Fe2C4P1       | -1990.3411956 | 34.86 |
| 294 | 03a-Tl99-Fe2C2P1              | -1990.3411747 | 34.87 |
| 295 | 02a-PressCapCube-Fe3C4P2      | -1990.3411730 | 34.87 |
| 296 | 01a-CapCube-Fe3C1P1           | -1990.3408985 | 35.04 |
| 297 | 03b-Tl99-Fe4P1C3              | -1990.3405215 | 35.28 |
| 298 | 02b-PressCapCube-Fe2P5C1      | -1990.3404944 | 35.30 |
| 299 | 01a-CapCube-Fe3C1P3           | -1990.3404890 | 35.30 |
| 300 | 02b-PressCapCube-Fe1P1C5      | -1990.3403541 | 35.39 |
| 301 | 01a-CapCube-Fe1C1P5           | -1990.3402680 | 35.44 |
| 302 | 01b-CapCube-Fe1P1C1           | -1990.3401473 | 35.52 |
| 303 | 02b-PressCapCube-Fe1P1C1      | -1990.3401335 | 35.52 |
| 304 | 02a-PressCapCube-Fe5C1P4      | -1990.3400351 | 35.59 |
| 305 | 02a-PressCapCube-Fe1C1P1      | -1990.3396977 | 35.80 |
| 306 | 01b-CapCube-Fe2P5C1           | -1990.3380959 | 36.80 |
| 307 | 02a-PressCapCube-Fe3C5P1_r-30 | -1990.3380837 | 36.81 |
| 308 | 01a-CapCube-Fe3C5P1           | -1990.3380826 | 36.81 |
| 309 | 02a-PressCapCube-Fe2C2P2      | -1990.3380775 | 36.81 |
| 310 | 03b-Tl99-Fe4P2C6              | -1990.3380663 | 36.82 |
| 311 | 03b-Tl99-Fe2P4C4              | -1990.3380288 | 36.84 |
| 312 | 02a-PressCapCube-Fe5C2P3      | -1990.3378779 | 36.94 |
| 313 | 03b-Tl99-Fe2P1C3              | -1990.3377841 | 37.00 |
| 314 | 01a-CapCube-Fe3C4P2           | -1990.3377699 | 37.01 |
| 315 | 02a-PressCapCube-Fe5C1P5      | -1990.3377468 | 37.02 |
| 316 | 02b-PressCapCube-Fe3P4C2      | -1990.3375429 | 37.15 |
| 317 | 02b-PressCapCube-Fe2P1C3      | -1990.3375275 | 37.16 |
| 318 | 02a-PressCapCube-Fe3C5P1_i-30 | -1990.3374806 | 37.19 |
| 319 | 04a-TricTrPrism-Fe2C1P6       | -1990.3374446 | 37.21 |
| 320 | 03a-Tl99-Fe3C1P6              | -1990.3372825 | 37.31 |
| 321 | 04b-TricTrPrism-Fe1P1C3       | -1990.3372790 | 37.32 |
| 322 | 03a-Tl99-Fe3C1P1_r-29         | -1990.3372473 | 37.34 |
| 323 | 02b-PressCapCube-Fe2P2C4      | -1990.3370787 | 37.44 |
| 324 | 03a-Tl99-Fe3C1P1_i-29         | -1990.3369474 | 37.52 |
| 325 | 03a-Tl99-Fe2C4P4              | -1990.3356772 | 38.32 |
| 326 | 03b-Tl99-Fe3P1C1              | -1990.3356315 | 38.35 |
| 327 | 04b-TricTrPrism-Fe2P2C6       | -1990.3356176 | 38.36 |
| 328 | 02b-PressCapCube-Fe2P1C5      | -1990.3356121 | 38.36 |
| 329 | 02b-PressCapCube-Fe3P5C1      | -1990.3356110 | 38.36 |
| 330 | 03a-Tl99-Fe3C4P3              | -1990.3355991 | 38.37 |
| 331 | 02b-PressCapCube-Fe2P2C2      | -1990.3355873 | 38.38 |
| 332 | 01b-CapCube-Fe2P3C1           | -1990.3354010 | 38.49 |
| 333 | 02a-PressCapCube-Fe1C3P2      | -1990.3350129 | 38.74 |



|     |                               |               |       |
|-----|-------------------------------|---------------|-------|
| 334 | 02b-PressCapCube-Fe1P3C2      | -1990.3349899 | 38.75 |
| 335 | 04b-TricTrPrism-Fe1P1C2       | -1990.3349833 | 38.76 |
| 336 | 04a-TricTrPrism-Fe1C1P2       | -1990.3349725 | 38.76 |
| 337 | 03a-Tl99-Fe3C5P1              | -1990.3347168 | 38.92 |
| 338 | 03a-Tl99-Fe1C1P1              | -1990.3347103 | 38.93 |
| 339 | 02a-PressCapCube-Fe1C1P3      | -1990.3344254 | 39.11 |
| 340 | 03b-Tl99-Fe3P5C1              | -1990.3344028 | 39.12 |
| 341 | 03a-Tl99-Fe4C3P1              | -1990.3340585 | 39.34 |
| 342 | 01b-CapCube-Fe3P4C1           | -1990.3326136 | 40.24 |
| 343 | 04a-TricTrPrism-Fe2C2P5       | -1990.3326071 | 40.25 |
| 344 | 01b-CapCube-Fe2P1C4           | -1990.3321330 | 40.54 |
| 345 | 01a-CapCube-Fe2C3P1           | -1990.3320605 | 40.59 |
| 346 | 03b-Tl99-Fe2P1C4              | -1990.3319701 | 40.65 |
| 347 | 02a-PressCapCube-Fe2C2P1      | -1990.3319637 | 40.65 |
| 348 | 01a-CapCube-Fe1C1P2           | -1990.3319438 | 40.66 |
| 349 | 02a-PressCapCube-Fe3C1P3      | -1990.3319274 | 40.67 |
| 350 | 02a-PressCapCube-Fe3C2P1      | -1990.3318928 | 40.70 |
| 351 | 03b-Tl99-Fe4P1C7              | -1990.3318795 | 40.70 |
| 352 | 01a-CapCube-Fe1C1P1           | -1990.3308619 | 41.34 |
| 353 | 02a-PressCapCube-Fe2C1P4      | -1990.3308590 | 41.34 |
| 354 | 02b-PressCapCube-Fe3P2C2      | -1990.3308392 | 41.36 |
| 355 | 03a-Tl99-Fe4C3P4              | -1990.3293485 | 42.29 |
| 356 | 02b-PressCapCube-Fe5P3C2      | -1990.3290475 | 42.48 |
| 357 | 03a-Tl99-Fe2C2P3              | -1990.3289582 | 42.54 |
| 358 | 02a-PressCapCube-Fe3C5P3      | -1990.3284765 | 42.84 |
| 359 | 03b-Tl99-Fe4P3C5              | -1990.3284029 | 42.89 |
| 360 | 02b-PressCapCube-Fe3P1C3      | -1990.3263328 | 44.18 |
| 361 | 03b-Tl99-Fe1P1C6              | -1990.3263234 | 44.19 |
| 362 | 02b-PressCapCube-Fe3P2C1      | -1990.3262568 | 44.23 |
| 363 | 03b-Tl99-Fe3P3C1              | -1990.3262457 | 44.24 |
| 364 | 03a-Tl99-Fe3C2P4              | -1990.3256940 | 44.59 |
| 365 | 03b-Tl99-Fe3P3C5              | -1990.3256527 | 44.61 |
| 366 | 03a-Tl99-Fe3C2P6              | -1990.3256369 | 44.62 |
| 367 | 04b-TricTrPrism-Fe1P2C3       | -1990.3256183 | 44.63 |
| 368 | 03b-Tl99-Fe3P4C4              | -1990.3256175 | 44.63 |
| 369 | 03b-Tl99-Fe3P5C3              | -1990.3255760 | 44.66 |
| 370 | 02b-PressCapCube-Fe1P2C1_r-20 | -1990.3255757 | 44.66 |
| 371 | 02b-PressCapCube-Fe1P2C1_i-20 | -1990.3250436 | 44.99 |
| 372 | 01a-CapCube-Fe3C2P1           | -1990.3249523 | 45.05 |
| 373 | 02a-PressCapCube-Fe3C3P3      | -1990.3249064 | 45.08 |
| 374 | 03b-Tl99-Fe1P2C3              | -1990.3248893 | 45.09 |
| 375 | 01b-CapCube-Fe2P4C1           | -1990.3244527 | 45.36 |

|     |                               |               |       |
|-----|-------------------------------|---------------|-------|
| 376 | 01a-CapCube-Fe2C1P1           | -1990.3243065 | 45.46 |
| 377 | 02a-PressCapCube-Fe2C5P3      | -1990.3237851 | 45.78 |
| 378 | 01a-CapCube-Fe3C2P3           | -1990.3235227 | 45.95 |
| 379 | 02a-PressCapCube-Fe5C1P1      | -1990.3233568 | 46.05 |
| 380 | 01a-CapCube-Fe2C1P4           | -1990.3224479 | 46.62 |
| 381 | 02a-PressCapCube-Fe3C1P5      | -1990.3217113 | 47.08 |
| 382 | 01a-CapCube-Fe3C1P4           | -1990.3214644 | 47.24 |
| 383 | 01b-CapCube-Fe2P3C3           | -1990.3212153 | 47.40 |
| 384 | 03b-Tl99-Fe3P4C3              | -1990.3211030 | 47.47 |
| 385 | 02a-PressCapCube-Fe5C3P2      | -1990.3210621 | 47.49 |
| 386 | 01a-CapCube-Fe3C2P4           | -1990.3210432 | 47.50 |
| 387 | 01b-CapCube-Fe3P3C2           | -1990.3203669 | 47.93 |
| 388 | 02a-PressCapCube-Fe1C3P1      | -1990.3185758 | 49.05 |
| 389 | 03a-Tl99-Fe1C1P6              | -1990.3183652 | 49.18 |
| 390 | 03a-Tl99-Fe3C6P2              | -1990.3178461 | 49.51 |
| 391 | 02b-PressCapCube-Fe2P4C2      | -1990.3176239 | 49.65 |
| 392 | 03b-Tl99-Fe3P2C4              | -1990.3175631 | 49.69 |
| 393 | 01a-CapCube-Fe3C3P2           | -1990.3170888 | 49.99 |
| 394 | 03a-Tl99-Fe3C3P4              | -1990.3169631 | 50.06 |
| 395 | 04a-TricTrPrism-Fe1C1P6       | -1990.3165165 | 50.34 |
| 396 | 02a-PressCapCube-Fe2C4P2      | -1990.3165149 | 50.35 |
| 397 | 04a-TricTrPrism-Fe1C2P1       | -1990.3165142 | 50.35 |
| 398 | 02a-PressCapCube-Fe2C4P1      | -1990.3162125 | 50.54 |
| 399 | 01b-CapCube-Fe3P1C4           | -1990.3160601 | 50.63 |
| 400 | 01b-CapCube-Fe3P2C3           | -1990.3159984 | 50.67 |
| 401 | 04a-TricTrPrism-Fe2C3P2       | -1990.3158492 | 50.76 |
| 402 | 04a-TricTrPrism-Fe2C1P5       | -1990.3151228 | 51.22 |
| 403 | 03b-Tl99-Fe1P3C1              | -1990.3140803 | 51.87 |
| 404 | 03a-Tl99-Fe1C3P1              | -1990.3140712 | 51.88 |
| 405 | 02a-PressCapCube-Fe5C2P1      | -1990.3133649 | 52.32 |
| 406 | 02b-PressCapCube-Fe5P3C3_i-94 | -1990.3105039 | 54.12 |
| 407 | 03b-Tl99-Fe2P5C3              | -1990.3104672 | 54.14 |
| 408 | 02a-PressCapCube-Fe2C6P1      | -1990.3101517 | 54.34 |
| 409 | 03a-Tl99-Fe4C1P7              | -1990.3100595 | 54.40 |
| 410 | 03b-Tl99-Fe4P1C5              | -1990.3071751 | 56.21 |
| 411 | 02a-PressCapCube-Fe5C2P2      | -1990.3071342 | 56.23 |
| 412 | 03b-Tl99-Fe2P2C1              | -1990.3058590 | 57.03 |
| 413 | 02a-PressCapCube-Fe3C6P1      | -1990.3058055 | 57.07 |
| 414 | 01a-CapCube-Fe3C4P1           | -1990.3053894 | 57.33 |
| 415 | 03a-Tl99-Fe2C4P3              | -1990.3051424 | 57.48 |
| 416 | 03a-Tl99-Fe4C2P6              | -1990.3026562 | 59.04 |
| 417 | 03a-Tl99-Fe3C3P3_i-14         | -1990.3020776 | 59.40 |

|     |                               |               |       |
|-----|-------------------------------|---------------|-------|
| 418 | 03a-TI99-Fe3C3P3_r-14         | -1990.3019964 | 59.46 |
| 419 | 01b-CapCube-Fe2P1C2           | -1990.3010538 | 60.05 |
| 420 | 01a-CapCube-Fe2C1P2           | -1990.2999064 | 60.77 |
| 421 | 02b-PressCapCube-Fe3P3C1      | -1990.2998710 | 60.79 |
| 422 | 02a-PressCapCube-Fe3C3P1_r-32 | -1990.2998426 | 60.81 |
| 423 | 02a-PressCapCube-Fe3C3P1_i-32 | -1990.2991510 | 61.24 |
| 424 | 02b-PressCapCube-Fe5P5C3      | -1990.2983369 | 61.75 |
| 425 | 02a-PressCapCube-Fe2C1P5      | -1990.2972500 | 62.43 |
| 426 | 02b-PressCapCube-Fe2P3C1      | -1990.2964149 | 62.96 |
| 427 | 02b-PressCapCube-Fe2P6C1      | -1990.2930267 | 65.08 |
| 428 | 01a-CapCube-Fe1C2P1           | -1990.2880927 | 68.18 |
| 429 | 03b-TI99-Fe3P2C6              | -1990.2876739 | 68.44 |
| 430 | 02a-PressCapCube-Fe2C5P1      | -1990.2874086 | 68.61 |
| 431 | 03a-TI99-Fe3C5P2              | -1990.2864189 | 69.23 |
| 432 | 01b-CapCube-Fe1P2C2           | -1990.2863708 | 69.26 |
| 433 | 01a-CapCube-Fe1C2P2           | -1990.2863390 | 69.28 |
| 434 | 03b-TI99-Fe3P3C3              | -1990.2850072 | 70.12 |
| 435 | 03a-TI99-Fe3C5P3              | -1990.2832796 | 71.20 |
| 436 | 03a-TI99-Fe3C4P4              | -1990.2832764 | 71.20 |
| 437 | 02a-PressCapCube-Fe1C4P1      | -1990.2721090 | 78.21 |
| 438 | 02b-PressCapCube-Fe1P4C1      | -1990.2720738 | 78.23 |
| 439 | 02b-PressCapCube-Fe1P1C3      | -1990.2635528 | 83.58 |

Table S3A. Initial CpFeCHPHB<sub>7</sub>H<sub>7</sub> structures, 648 in all.

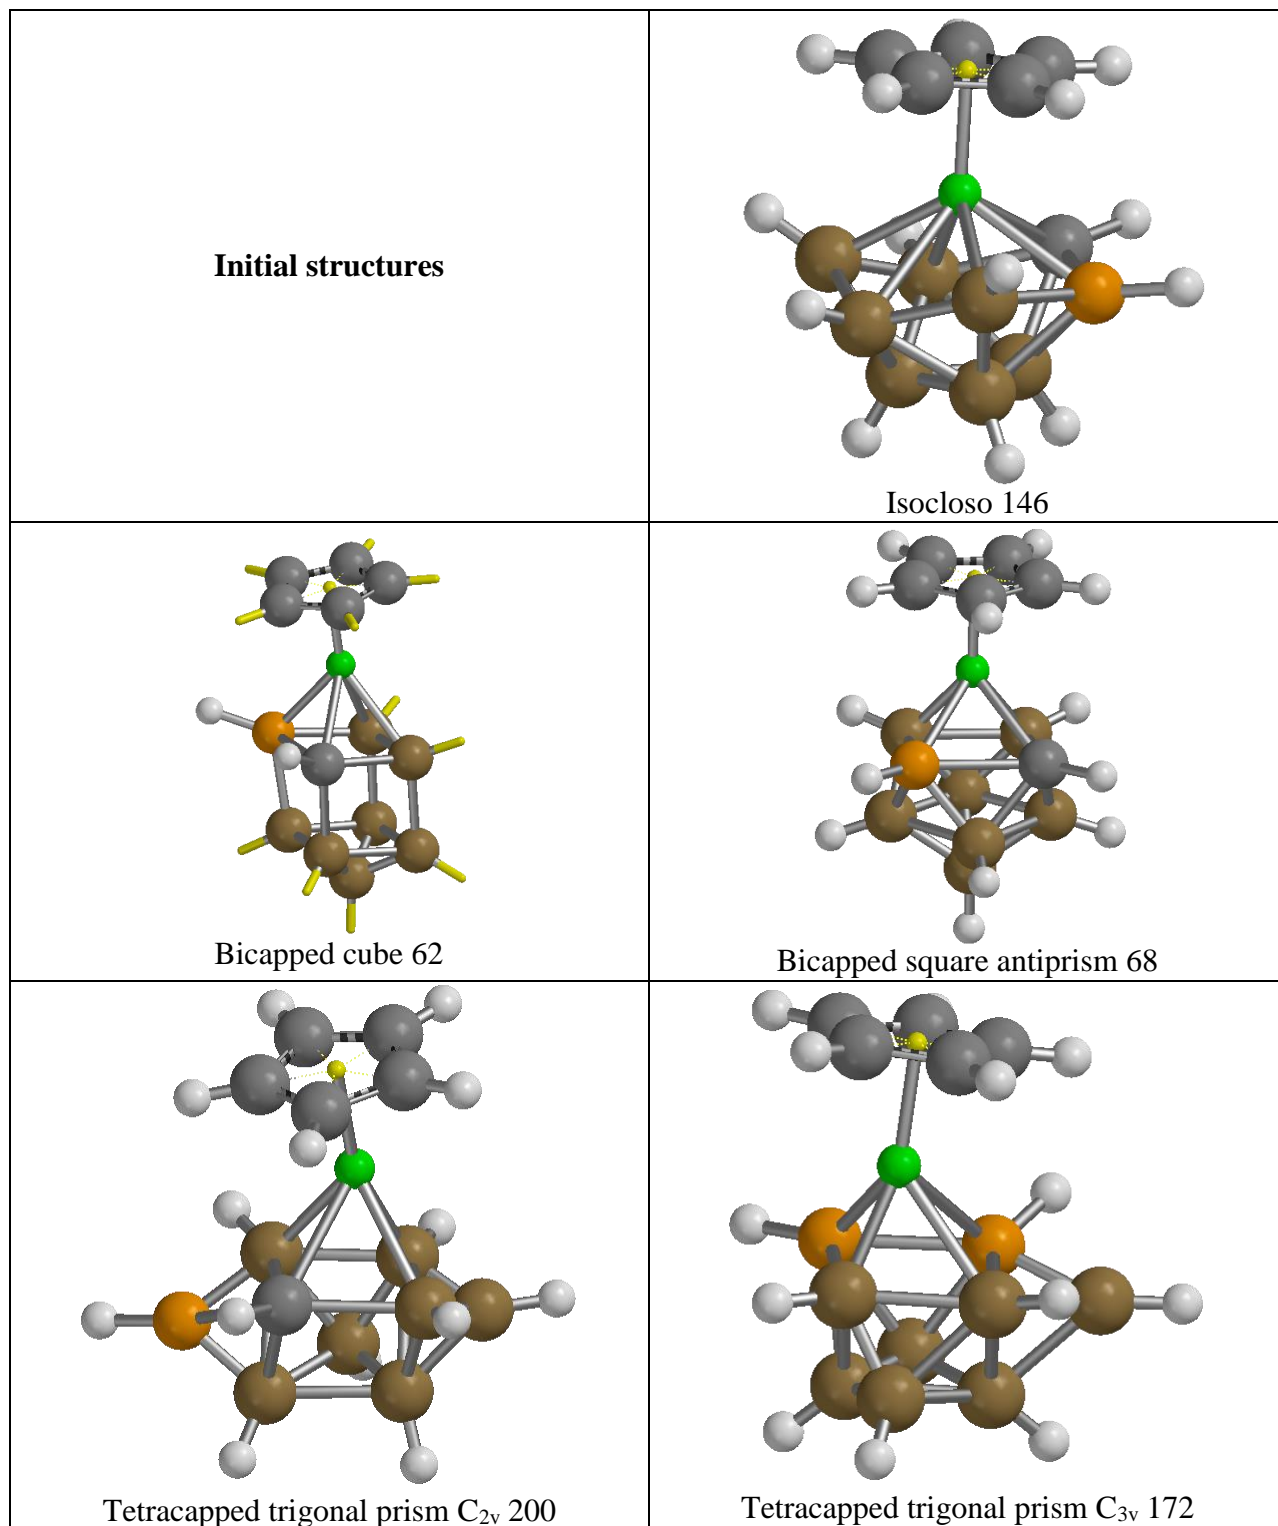

Table S3B. Distance table for the lowest-lying CpFeCHPCH<sub>3</sub>B<sub>7</sub>H<sub>7</sub> structures after M06L/6-311G(d,p) optimization. Included are the ZPcorrected E (a.u.), relative energy (kcal/mol), HOMO/LUMO gaps (eV) and symmetry.

| 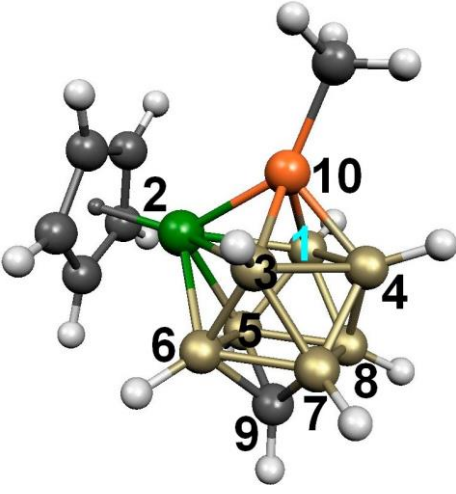 <p><b>1.</b> -2055.17509380 0.0<br/>Cs H/L 2.59</p>              | <table border="1"> <thead> <tr> <th></th> <th>1</th> <th>2</th> <th>3</th> <th>4</th> <th>5</th> </tr> </thead> <tbody> <tr><td>1 B</td><td>0.000000</td><td></td><td></td><td></td><td></td></tr> <tr><td>2 Fe</td><td>2.246414</td><td>0.000000</td><td></td><td></td><td></td></tr> <tr><td>3 B</td><td>2.738801</td><td>2.247334</td><td>0.000000</td><td></td><td></td></tr> <tr><td>4 B</td><td>1.915172</td><td>3.114752</td><td>1.916002</td><td>0.000000</td><td></td></tr> <tr><td>5 B</td><td>1.771272</td><td>2.098058</td><td>2.869793</td><td>2.837958</td><td>0.000000</td></tr> <tr><td>6 B</td><td>2.868590</td><td>2.097738</td><td>1.771812</td><td>2.838114</td><td>1.859901</td></tr> <tr><td>7 B</td><td>2.859171</td><td>3.301199</td><td>1.780044</td><td>1.762796</td><td>2.606689</td></tr> <tr><td>8 B</td><td>1.779415</td><td>3.300940</td><td>2.860201</td><td>1.762860</td><td>1.841570</td></tr> <tr><td>9 C</td><td>2.735613</td><td>3.141834</td><td>2.736143</td><td>2.717240</td><td>1.598458</td></tr> <tr><td>10 P</td><td>1.919395</td><td>2.073437</td><td>1.918884</td><td>1.913747</td><td>3.079482</td></tr> <tr> <th></th> <th>6</th> <th>7</th> <th>8</th> <th>9</th> <th>10</th> </tr> <tr><td>6 B</td><td>0.000000</td><td></td><td></td><td></td><td></td></tr> <tr><td>7 B</td><td>1.842218</td><td>0.000000</td><td></td><td></td><td></td></tr> <tr><td>8 B</td><td>2.606785</td><td>1.829401</td><td>0.000000</td><td></td><td></td></tr> <tr><td>9 C</td><td>1.598466</td><td>1.589485</td><td>1.589722</td><td>0.000000</td><td></td></tr> <tr><td>10 P</td><td>3.078808</td><td>3.089157</td><td>3.089584</td><td>3.712976</td><td>0.000000</td></tr> </tbody> </table> |          | 1        | 2        | 3        | 4 | 5 | 1 B | 0.000000 |  |  |  |  | 2 Fe | 2.246414 | 0.000000 |  |  |  | 3 B | 2.738801 | 2.247334 | 0.000000 |  |  | 4 B  | 1.915172 | 3.114752 | 1.916002 | 0.000000 |  | 5 B | 1.771272 | 2.098058 | 2.869793 | 2.837958 | 0.000000 | 6 B | 2.868590 | 2.097738 | 1.771812 | 2.838114 | 1.859901 | 7 B | 2.859171 | 3.301199 | 1.780044 | 1.762796 | 2.606689 | 8 B | 1.779415 | 3.300940 | 2.860201 | 1.762860 | 1.841570 | 9 C | 2.735613 | 3.141834 | 2.736143 | 2.717240 | 1.598458 | 10 P | 1.919395 | 2.073437 | 1.918884 | 1.913747 | 3.079482 |  | 6 | 7 | 8 | 9 | 10 | 6 B | 0.000000 |  |  |  |  | 7 B | 1.842218 | 0.000000 |  |  |  | 8 B | 2.606785 | 1.829401 | 0.000000 |  |  | 9 C | 1.598466 | 1.589485 | 1.589722 | 0.000000 |  | 10 P | 3.078808 | 3.089157 | 3.089584 | 3.712976 | 0.000000 |
|----------------------------------------------------------------------------------------------------------------------------------------------------|--------------------------------------------------------------------------------------------------------------------------------------------------------------------------------------------------------------------------------------------------------------------------------------------------------------------------------------------------------------------------------------------------------------------------------------------------------------------------------------------------------------------------------------------------------------------------------------------------------------------------------------------------------------------------------------------------------------------------------------------------------------------------------------------------------------------------------------------------------------------------------------------------------------------------------------------------------------------------------------------------------------------------------------------------------------------------------------------------------------------------------------------------------------------------------------------------------------------------------------------------------------------------------------------------------------------------------------------------------------------------------------------------------------------------------------------------------------------------------------------------------------------------------------------------------------------------------------------------------------------------------------------------------------------------------------------------------------------------------|----------|----------|----------|----------|---|---|-----|----------|--|--|--|--|------|----------|----------|--|--|--|-----|----------|----------|----------|--|--|------|----------|----------|----------|----------|--|-----|----------|----------|----------|----------|----------|-----|----------|----------|----------|----------|----------|-----|----------|----------|----------|----------|----------|-----|----------|----------|----------|----------|----------|-----|----------|----------|----------|----------|----------|------|----------|----------|----------|----------|----------|--|---|---|---|---|----|-----|----------|--|--|--|--|-----|----------|----------|--|--|--|-----|----------|----------|----------|--|--|-----|----------|----------|----------|----------|--|------|----------|----------|----------|----------|----------|
|                                                                                                                                                    | 1                                                                                                                                                                                                                                                                                                                                                                                                                                                                                                                                                                                                                                                                                                                                                                                                                                                                                                                                                                                                                                                                                                                                                                                                                                                                                                                                                                                                                                                                                                                                                                                                                                                                                                                              | 2        | 3        | 4        | 5        |   |   |     |          |  |  |  |  |      |          |          |  |  |  |     |          |          |          |  |  |      |          |          |          |          |  |     |          |          |          |          |          |     |          |          |          |          |          |     |          |          |          |          |          |     |          |          |          |          |          |     |          |          |          |          |          |      |          |          |          |          |          |  |   |   |   |   |    |     |          |  |  |  |  |     |          |          |  |  |  |     |          |          |          |  |  |     |          |          |          |          |  |      |          |          |          |          |          |
| 1 B                                                                                                                                                | 0.000000                                                                                                                                                                                                                                                                                                                                                                                                                                                                                                                                                                                                                                                                                                                                                                                                                                                                                                                                                                                                                                                                                                                                                                                                                                                                                                                                                                                                                                                                                                                                                                                                                                                                                                                       |          |          |          |          |   |   |     |          |  |  |  |  |      |          |          |  |  |  |     |          |          |          |  |  |      |          |          |          |          |  |     |          |          |          |          |          |     |          |          |          |          |          |     |          |          |          |          |          |     |          |          |          |          |          |     |          |          |          |          |          |      |          |          |          |          |          |  |   |   |   |   |    |     |          |  |  |  |  |     |          |          |  |  |  |     |          |          |          |  |  |     |          |          |          |          |  |      |          |          |          |          |          |
| 2 Fe                                                                                                                                               | 2.246414                                                                                                                                                                                                                                                                                                                                                                                                                                                                                                                                                                                                                                                                                                                                                                                                                                                                                                                                                                                                                                                                                                                                                                                                                                                                                                                                                                                                                                                                                                                                                                                                                                                                                                                       | 0.000000 |          |          |          |   |   |     |          |  |  |  |  |      |          |          |  |  |  |     |          |          |          |  |  |      |          |          |          |          |  |     |          |          |          |          |          |     |          |          |          |          |          |     |          |          |          |          |          |     |          |          |          |          |          |     |          |          |          |          |          |      |          |          |          |          |          |  |   |   |   |   |    |     |          |  |  |  |  |     |          |          |  |  |  |     |          |          |          |  |  |     |          |          |          |          |  |      |          |          |          |          |          |
| 3 B                                                                                                                                                | 2.738801                                                                                                                                                                                                                                                                                                                                                                                                                                                                                                                                                                                                                                                                                                                                                                                                                                                                                                                                                                                                                                                                                                                                                                                                                                                                                                                                                                                                                                                                                                                                                                                                                                                                                                                       | 2.247334 | 0.000000 |          |          |   |   |     |          |  |  |  |  |      |          |          |  |  |  |     |          |          |          |  |  |      |          |          |          |          |  |     |          |          |          |          |          |     |          |          |          |          |          |     |          |          |          |          |          |     |          |          |          |          |          |     |          |          |          |          |          |      |          |          |          |          |          |  |   |   |   |   |    |     |          |  |  |  |  |     |          |          |  |  |  |     |          |          |          |  |  |     |          |          |          |          |  |      |          |          |          |          |          |
| 4 B                                                                                                                                                | 1.915172                                                                                                                                                                                                                                                                                                                                                                                                                                                                                                                                                                                                                                                                                                                                                                                                                                                                                                                                                                                                                                                                                                                                                                                                                                                                                                                                                                                                                                                                                                                                                                                                                                                                                                                       | 3.114752 | 1.916002 | 0.000000 |          |   |   |     |          |  |  |  |  |      |          |          |  |  |  |     |          |          |          |  |  |      |          |          |          |          |  |     |          |          |          |          |          |     |          |          |          |          |          |     |          |          |          |          |          |     |          |          |          |          |          |     |          |          |          |          |          |      |          |          |          |          |          |  |   |   |   |   |    |     |          |  |  |  |  |     |          |          |  |  |  |     |          |          |          |  |  |     |          |          |          |          |  |      |          |          |          |          |          |
| 5 B                                                                                                                                                | 1.771272                                                                                                                                                                                                                                                                                                                                                                                                                                                                                                                                                                                                                                                                                                                                                                                                                                                                                                                                                                                                                                                                                                                                                                                                                                                                                                                                                                                                                                                                                                                                                                                                                                                                                                                       | 2.098058 | 2.869793 | 2.837958 | 0.000000 |   |   |     |          |  |  |  |  |      |          |          |  |  |  |     |          |          |          |  |  |      |          |          |          |          |  |     |          |          |          |          |          |     |          |          |          |          |          |     |          |          |          |          |          |     |          |          |          |          |          |     |          |          |          |          |          |      |          |          |          |          |          |  |   |   |   |   |    |     |          |  |  |  |  |     |          |          |  |  |  |     |          |          |          |  |  |     |          |          |          |          |  |      |          |          |          |          |          |
| 6 B                                                                                                                                                | 2.868590                                                                                                                                                                                                                                                                                                                                                                                                                                                                                                                                                                                                                                                                                                                                                                                                                                                                                                                                                                                                                                                                                                                                                                                                                                                                                                                                                                                                                                                                                                                                                                                                                                                                                                                       | 2.097738 | 1.771812 | 2.838114 | 1.859901 |   |   |     |          |  |  |  |  |      |          |          |  |  |  |     |          |          |          |  |  |      |          |          |          |          |  |     |          |          |          |          |          |     |          |          |          |          |          |     |          |          |          |          |          |     |          |          |          |          |          |     |          |          |          |          |          |      |          |          |          |          |          |  |   |   |   |   |    |     |          |  |  |  |  |     |          |          |  |  |  |     |          |          |          |  |  |     |          |          |          |          |  |      |          |          |          |          |          |
| 7 B                                                                                                                                                | 2.859171                                                                                                                                                                                                                                                                                                                                                                                                                                                                                                                                                                                                                                                                                                                                                                                                                                                                                                                                                                                                                                                                                                                                                                                                                                                                                                                                                                                                                                                                                                                                                                                                                                                                                                                       | 3.301199 | 1.780044 | 1.762796 | 2.606689 |   |   |     |          |  |  |  |  |      |          |          |  |  |  |     |          |          |          |  |  |      |          |          |          |          |  |     |          |          |          |          |          |     |          |          |          |          |          |     |          |          |          |          |          |     |          |          |          |          |          |     |          |          |          |          |          |      |          |          |          |          |          |  |   |   |   |   |    |     |          |  |  |  |  |     |          |          |  |  |  |     |          |          |          |  |  |     |          |          |          |          |  |      |          |          |          |          |          |
| 8 B                                                                                                                                                | 1.779415                                                                                                                                                                                                                                                                                                                                                                                                                                                                                                                                                                                                                                                                                                                                                                                                                                                                                                                                                                                                                                                                                                                                                                                                                                                                                                                                                                                                                                                                                                                                                                                                                                                                                                                       | 3.300940 | 2.860201 | 1.762860 | 1.841570 |   |   |     |          |  |  |  |  |      |          |          |  |  |  |     |          |          |          |  |  |      |          |          |          |          |  |     |          |          |          |          |          |     |          |          |          |          |          |     |          |          |          |          |          |     |          |          |          |          |          |     |          |          |          |          |          |      |          |          |          |          |          |  |   |   |   |   |    |     |          |  |  |  |  |     |          |          |  |  |  |     |          |          |          |  |  |     |          |          |          |          |  |      |          |          |          |          |          |
| 9 C                                                                                                                                                | 2.735613                                                                                                                                                                                                                                                                                                                                                                                                                                                                                                                                                                                                                                                                                                                                                                                                                                                                                                                                                                                                                                                                                                                                                                                                                                                                                                                                                                                                                                                                                                                                                                                                                                                                                                                       | 3.141834 | 2.736143 | 2.717240 | 1.598458 |   |   |     |          |  |  |  |  |      |          |          |  |  |  |     |          |          |          |  |  |      |          |          |          |          |  |     |          |          |          |          |          |     |          |          |          |          |          |     |          |          |          |          |          |     |          |          |          |          |          |     |          |          |          |          |          |      |          |          |          |          |          |  |   |   |   |   |    |     |          |  |  |  |  |     |          |          |  |  |  |     |          |          |          |  |  |     |          |          |          |          |  |      |          |          |          |          |          |
| 10 P                                                                                                                                               | 1.919395                                                                                                                                                                                                                                                                                                                                                                                                                                                                                                                                                                                                                                                                                                                                                                                                                                                                                                                                                                                                                                                                                                                                                                                                                                                                                                                                                                                                                                                                                                                                                                                                                                                                                                                       | 2.073437 | 1.918884 | 1.913747 | 3.079482 |   |   |     |          |  |  |  |  |      |          |          |  |  |  |     |          |          |          |  |  |      |          |          |          |          |  |     |          |          |          |          |          |     |          |          |          |          |          |     |          |          |          |          |          |     |          |          |          |          |          |     |          |          |          |          |          |      |          |          |          |          |          |  |   |   |   |   |    |     |          |  |  |  |  |     |          |          |  |  |  |     |          |          |          |  |  |     |          |          |          |          |  |      |          |          |          |          |          |
|                                                                                                                                                    | 6                                                                                                                                                                                                                                                                                                                                                                                                                                                                                                                                                                                                                                                                                                                                                                                                                                                                                                                                                                                                                                                                                                                                                                                                                                                                                                                                                                                                                                                                                                                                                                                                                                                                                                                              | 7        | 8        | 9        | 10       |   |   |     |          |  |  |  |  |      |          |          |  |  |  |     |          |          |          |  |  |      |          |          |          |          |  |     |          |          |          |          |          |     |          |          |          |          |          |     |          |          |          |          |          |     |          |          |          |          |          |     |          |          |          |          |          |      |          |          |          |          |          |  |   |   |   |   |    |     |          |  |  |  |  |     |          |          |  |  |  |     |          |          |          |  |  |     |          |          |          |          |  |      |          |          |          |          |          |
| 6 B                                                                                                                                                | 0.000000                                                                                                                                                                                                                                                                                                                                                                                                                                                                                                                                                                                                                                                                                                                                                                                                                                                                                                                                                                                                                                                                                                                                                                                                                                                                                                                                                                                                                                                                                                                                                                                                                                                                                                                       |          |          |          |          |   |   |     |          |  |  |  |  |      |          |          |  |  |  |     |          |          |          |  |  |      |          |          |          |          |  |     |          |          |          |          |          |     |          |          |          |          |          |     |          |          |          |          |          |     |          |          |          |          |          |     |          |          |          |          |          |      |          |          |          |          |          |  |   |   |   |   |    |     |          |  |  |  |  |     |          |          |  |  |  |     |          |          |          |  |  |     |          |          |          |          |  |      |          |          |          |          |          |
| 7 B                                                                                                                                                | 1.842218                                                                                                                                                                                                                                                                                                                                                                                                                                                                                                                                                                                                                                                                                                                                                                                                                                                                                                                                                                                                                                                                                                                                                                                                                                                                                                                                                                                                                                                                                                                                                                                                                                                                                                                       | 0.000000 |          |          |          |   |   |     |          |  |  |  |  |      |          |          |  |  |  |     |          |          |          |  |  |      |          |          |          |          |  |     |          |          |          |          |          |     |          |          |          |          |          |     |          |          |          |          |          |     |          |          |          |          |          |     |          |          |          |          |          |      |          |          |          |          |          |  |   |   |   |   |    |     |          |  |  |  |  |     |          |          |  |  |  |     |          |          |          |  |  |     |          |          |          |          |  |      |          |          |          |          |          |
| 8 B                                                                                                                                                | 2.606785                                                                                                                                                                                                                                                                                                                                                                                                                                                                                                                                                                                                                                                                                                                                                                                                                                                                                                                                                                                                                                                                                                                                                                                                                                                                                                                                                                                                                                                                                                                                                                                                                                                                                                                       | 1.829401 | 0.000000 |          |          |   |   |     |          |  |  |  |  |      |          |          |  |  |  |     |          |          |          |  |  |      |          |          |          |          |  |     |          |          |          |          |          |     |          |          |          |          |          |     |          |          |          |          |          |     |          |          |          |          |          |     |          |          |          |          |          |      |          |          |          |          |          |  |   |   |   |   |    |     |          |  |  |  |  |     |          |          |  |  |  |     |          |          |          |  |  |     |          |          |          |          |  |      |          |          |          |          |          |
| 9 C                                                                                                                                                | 1.598466                                                                                                                                                                                                                                                                                                                                                                                                                                                                                                                                                                                                                                                                                                                                                                                                                                                                                                                                                                                                                                                                                                                                                                                                                                                                                                                                                                                                                                                                                                                                                                                                                                                                                                                       | 1.589485 | 1.589722 | 0.000000 |          |   |   |     |          |  |  |  |  |      |          |          |  |  |  |     |          |          |          |  |  |      |          |          |          |          |  |     |          |          |          |          |          |     |          |          |          |          |          |     |          |          |          |          |          |     |          |          |          |          |          |     |          |          |          |          |          |      |          |          |          |          |          |  |   |   |   |   |    |     |          |  |  |  |  |     |          |          |  |  |  |     |          |          |          |  |  |     |          |          |          |          |  |      |          |          |          |          |          |
| 10 P                                                                                                                                               | 3.078808                                                                                                                                                                                                                                                                                                                                                                                                                                                                                                                                                                                                                                                                                                                                                                                                                                                                                                                                                                                                                                                                                                                                                                                                                                                                                                                                                                                                                                                                                                                                                                                                                                                                                                                       | 3.089157 | 3.089584 | 3.712976 | 0.000000 |   |   |     |          |  |  |  |  |      |          |          |  |  |  |     |          |          |          |  |  |      |          |          |          |          |  |     |          |          |          |          |          |     |          |          |          |          |          |     |          |          |          |          |          |     |          |          |          |          |          |     |          |          |          |          |          |      |          |          |          |          |          |  |   |   |   |   |    |     |          |  |  |  |  |     |          |          |  |  |  |     |          |          |          |  |  |     |          |          |          |          |  |      |          |          |          |          |          |
|  <p><b>2.</b> -2055.17152180 +2.2<br/>C<sub>1</sub> H/L 2.55</p> | <table border="1"> <thead> <tr> <th></th> <th>1</th> <th>2</th> <th>3</th> <th>4</th> <th>5</th> </tr> </thead> <tbody> <tr><td>1 B</td><td>0.000000</td><td></td><td></td><td></td><td></td></tr> <tr><td>2 B</td><td>1.815402</td><td>0.000000</td><td></td><td></td><td></td></tr> <tr><td>3 P</td><td>2.704840</td><td>2.013251</td><td>0.000000</td><td></td><td></td></tr> <tr><td>4 Fe</td><td>2.156626</td><td>3.039591</td><td>2.168069</td><td>0.000000</td><td></td></tr> <tr><td>5 B</td><td>1.780162</td><td>1.782996</td><td>2.969178</td><td>3.237814</td><td>0.000000</td></tr> <tr><td>6 B</td><td>2.831189</td><td>1.865106</td><td>1.982280</td><td>3.279129</td><td>1.804446</td></tr> <tr><td>7 B</td><td>2.865404</td><td>2.990713</td><td>2.017899</td><td>2.084023</td><td>2.624341</td></tr> <tr><td>8 B</td><td>1.780714</td><td>2.847921</td><td>2.967930</td><td>2.083464</td><td>1.825979</td></tr> <tr><td>9 C</td><td>2.755850</td><td>2.795660</td><td>2.907585</td><td>3.133539</td><td>1.596516</td></tr> <tr><td>10 B</td><td>1.687353</td><td>1.777911</td><td>1.919063</td><td>2.027414</td><td>2.956537</td></tr> <tr> <th></th> <th>6</th> <th>7</th> <th>8</th> <th>9</th> <th>10</th> </tr> <tr><td>6 B</td><td>0.000000</td><td></td><td></td><td></td><td></td></tr> <tr><td>7 B</td><td>1.960754</td><td>0.000000</td><td></td><td></td><td></td></tr> <tr><td>8 B</td><td>2.612556</td><td>1.816034</td><td>0.000000</td><td></td><td></td></tr> <tr><td>9 C</td><td>1.581350</td><td>1.592834</td><td>1.622045</td><td>0.000000</td><td></td></tr> <tr><td>10 B</td><td>3.091236</td><td>3.166890</td><td>2.986546</td><td>3.671240</td><td>0.000000</td></tr> </tbody> </table> |          | 1        | 2        | 3        | 4 | 5 | 1 B | 0.000000 |  |  |  |  | 2 B  | 1.815402 | 0.000000 |  |  |  | 3 P | 2.704840 | 2.013251 | 0.000000 |  |  | 4 Fe | 2.156626 | 3.039591 | 2.168069 | 0.000000 |  | 5 B | 1.780162 | 1.782996 | 2.969178 | 3.237814 | 0.000000 | 6 B | 2.831189 | 1.865106 | 1.982280 | 3.279129 | 1.804446 | 7 B | 2.865404 | 2.990713 | 2.017899 | 2.084023 | 2.624341 | 8 B | 1.780714 | 2.847921 | 2.967930 | 2.083464 | 1.825979 | 9 C | 2.755850 | 2.795660 | 2.907585 | 3.133539 | 1.596516 | 10 B | 1.687353 | 1.777911 | 1.919063 | 2.027414 | 2.956537 |  | 6 | 7 | 8 | 9 | 10 | 6 B | 0.000000 |  |  |  |  | 7 B | 1.960754 | 0.000000 |  |  |  | 8 B | 2.612556 | 1.816034 | 0.000000 |  |  | 9 C | 1.581350 | 1.592834 | 1.622045 | 0.000000 |  | 10 B | 3.091236 | 3.166890 | 2.986546 | 3.671240 | 0.000000 |
|                                                                                                                                                    | 1                                                                                                                                                                                                                                                                                                                                                                                                                                                                                                                                                                                                                                                                                                                                                                                                                                                                                                                                                                                                                                                                                                                                                                                                                                                                                                                                                                                                                                                                                                                                                                                                                                                                                                                              | 2        | 3        | 4        | 5        |   |   |     |          |  |  |  |  |      |          |          |  |  |  |     |          |          |          |  |  |      |          |          |          |          |  |     |          |          |          |          |          |     |          |          |          |          |          |     |          |          |          |          |          |     |          |          |          |          |          |     |          |          |          |          |          |      |          |          |          |          |          |  |   |   |   |   |    |     |          |  |  |  |  |     |          |          |  |  |  |     |          |          |          |  |  |     |          |          |          |          |  |      |          |          |          |          |          |
| 1 B                                                                                                                                                | 0.000000                                                                                                                                                                                                                                                                                                                                                                                                                                                                                                                                                                                                                                                                                                                                                                                                                                                                                                                                                                                                                                                                                                                                                                                                                                                                                                                                                                                                                                                                                                                                                                                                                                                                                                                       |          |          |          |          |   |   |     |          |  |  |  |  |      |          |          |  |  |  |     |          |          |          |  |  |      |          |          |          |          |  |     |          |          |          |          |          |     |          |          |          |          |          |     |          |          |          |          |          |     |          |          |          |          |          |     |          |          |          |          |          |      |          |          |          |          |          |  |   |   |   |   |    |     |          |  |  |  |  |     |          |          |  |  |  |     |          |          |          |  |  |     |          |          |          |          |  |      |          |          |          |          |          |
| 2 B                                                                                                                                                | 1.815402                                                                                                                                                                                                                                                                                                                                                                                                                                                                                                                                                                                                                                                                                                                                                                                                                                                                                                                                                                                                                                                                                                                                                                                                                                                                                                                                                                                                                                                                                                                                                                                                                                                                                                                       | 0.000000 |          |          |          |   |   |     |          |  |  |  |  |      |          |          |  |  |  |     |          |          |          |  |  |      |          |          |          |          |  |     |          |          |          |          |          |     |          |          |          |          |          |     |          |          |          |          |          |     |          |          |          |          |          |     |          |          |          |          |          |      |          |          |          |          |          |  |   |   |   |   |    |     |          |  |  |  |  |     |          |          |  |  |  |     |          |          |          |  |  |     |          |          |          |          |  |      |          |          |          |          |          |
| 3 P                                                                                                                                                | 2.704840                                                                                                                                                                                                                                                                                                                                                                                                                                                                                                                                                                                                                                                                                                                                                                                                                                                                                                                                                                                                                                                                                                                                                                                                                                                                                                                                                                                                                                                                                                                                                                                                                                                                                                                       | 2.013251 | 0.000000 |          |          |   |   |     |          |  |  |  |  |      |          |          |  |  |  |     |          |          |          |  |  |      |          |          |          |          |  |     |          |          |          |          |          |     |          |          |          |          |          |     |          |          |          |          |          |     |          |          |          |          |          |     |          |          |          |          |          |      |          |          |          |          |          |  |   |   |   |   |    |     |          |  |  |  |  |     |          |          |  |  |  |     |          |          |          |  |  |     |          |          |          |          |  |      |          |          |          |          |          |
| 4 Fe                                                                                                                                               | 2.156626                                                                                                                                                                                                                                                                                                                                                                                                                                                                                                                                                                                                                                                                                                                                                                                                                                                                                                                                                                                                                                                                                                                                                                                                                                                                                                                                                                                                                                                                                                                                                                                                                                                                                                                       | 3.039591 | 2.168069 | 0.000000 |          |   |   |     |          |  |  |  |  |      |          |          |  |  |  |     |          |          |          |  |  |      |          |          |          |          |  |     |          |          |          |          |          |     |          |          |          |          |          |     |          |          |          |          |          |     |          |          |          |          |          |     |          |          |          |          |          |      |          |          |          |          |          |  |   |   |   |   |    |     |          |  |  |  |  |     |          |          |  |  |  |     |          |          |          |  |  |     |          |          |          |          |  |      |          |          |          |          |          |
| 5 B                                                                                                                                                | 1.780162                                                                                                                                                                                                                                                                                                                                                                                                                                                                                                                                                                                                                                                                                                                                                                                                                                                                                                                                                                                                                                                                                                                                                                                                                                                                                                                                                                                                                                                                                                                                                                                                                                                                                                                       | 1.782996 | 2.969178 | 3.237814 | 0.000000 |   |   |     |          |  |  |  |  |      |          |          |  |  |  |     |          |          |          |  |  |      |          |          |          |          |  |     |          |          |          |          |          |     |          |          |          |          |          |     |          |          |          |          |          |     |          |          |          |          |          |     |          |          |          |          |          |      |          |          |          |          |          |  |   |   |   |   |    |     |          |  |  |  |  |     |          |          |  |  |  |     |          |          |          |  |  |     |          |          |          |          |  |      |          |          |          |          |          |
| 6 B                                                                                                                                                | 2.831189                                                                                                                                                                                                                                                                                                                                                                                                                                                                                                                                                                                                                                                                                                                                                                                                                                                                                                                                                                                                                                                                                                                                                                                                                                                                                                                                                                                                                                                                                                                                                                                                                                                                                                                       | 1.865106 | 1.982280 | 3.279129 | 1.804446 |   |   |     |          |  |  |  |  |      |          |          |  |  |  |     |          |          |          |  |  |      |          |          |          |          |  |     |          |          |          |          |          |     |          |          |          |          |          |     |          |          |          |          |          |     |          |          |          |          |          |     |          |          |          |          |          |      |          |          |          |          |          |  |   |   |   |   |    |     |          |  |  |  |  |     |          |          |  |  |  |     |          |          |          |  |  |     |          |          |          |          |  |      |          |          |          |          |          |
| 7 B                                                                                                                                                | 2.865404                                                                                                                                                                                                                                                                                                                                                                                                                                                                                                                                                                                                                                                                                                                                                                                                                                                                                                                                                                                                                                                                                                                                                                                                                                                                                                                                                                                                                                                                                                                                                                                                                                                                                                                       | 2.990713 | 2.017899 | 2.084023 | 2.624341 |   |   |     |          |  |  |  |  |      |          |          |  |  |  |     |          |          |          |  |  |      |          |          |          |          |  |     |          |          |          |          |          |     |          |          |          |          |          |     |          |          |          |          |          |     |          |          |          |          |          |     |          |          |          |          |          |      |          |          |          |          |          |  |   |   |   |   |    |     |          |  |  |  |  |     |          |          |  |  |  |     |          |          |          |  |  |     |          |          |          |          |  |      |          |          |          |          |          |
| 8 B                                                                                                                                                | 1.780714                                                                                                                                                                                                                                                                                                                                                                                                                                                                                                                                                                                                                                                                                                                                                                                                                                                                                                                                                                                                                                                                                                                                                                                                                                                                                                                                                                                                                                                                                                                                                                                                                                                                                                                       | 2.847921 | 2.967930 | 2.083464 | 1.825979 |   |   |     |          |  |  |  |  |      |          |          |  |  |  |     |          |          |          |  |  |      |          |          |          |          |  |     |          |          |          |          |          |     |          |          |          |          |          |     |          |          |          |          |          |     |          |          |          |          |          |     |          |          |          |          |          |      |          |          |          |          |          |  |   |   |   |   |    |     |          |  |  |  |  |     |          |          |  |  |  |     |          |          |          |  |  |     |          |          |          |          |  |      |          |          |          |          |          |
| 9 C                                                                                                                                                | 2.755850                                                                                                                                                                                                                                                                                                                                                                                                                                                                                                                                                                                                                                                                                                                                                                                                                                                                                                                                                                                                                                                                                                                                                                                                                                                                                                                                                                                                                                                                                                                                                                                                                                                                                                                       | 2.795660 | 2.907585 | 3.133539 | 1.596516 |   |   |     |          |  |  |  |  |      |          |          |  |  |  |     |          |          |          |  |  |      |          |          |          |          |  |     |          |          |          |          |          |     |          |          |          |          |          |     |          |          |          |          |          |     |          |          |          |          |          |     |          |          |          |          |          |      |          |          |          |          |          |  |   |   |   |   |    |     |          |  |  |  |  |     |          |          |  |  |  |     |          |          |          |  |  |     |          |          |          |          |  |      |          |          |          |          |          |
| 10 B                                                                                                                                               | 1.687353                                                                                                                                                                                                                                                                                                                                                                                                                                                                                                                                                                                                                                                                                                                                                                                                                                                                                                                                                                                                                                                                                                                                                                                                                                                                                                                                                                                                                                                                                                                                                                                                                                                                                                                       | 1.777911 | 1.919063 | 2.027414 | 2.956537 |   |   |     |          |  |  |  |  |      |          |          |  |  |  |     |          |          |          |  |  |      |          |          |          |          |  |     |          |          |          |          |          |     |          |          |          |          |          |     |          |          |          |          |          |     |          |          |          |          |          |     |          |          |          |          |          |      |          |          |          |          |          |  |   |   |   |   |    |     |          |  |  |  |  |     |          |          |  |  |  |     |          |          |          |  |  |     |          |          |          |          |  |      |          |          |          |          |          |
|                                                                                                                                                    | 6                                                                                                                                                                                                                                                                                                                                                                                                                                                                                                                                                                                                                                                                                                                                                                                                                                                                                                                                                                                                                                                                                                                                                                                                                                                                                                                                                                                                                                                                                                                                                                                                                                                                                                                              | 7        | 8        | 9        | 10       |   |   |     |          |  |  |  |  |      |          |          |  |  |  |     |          |          |          |  |  |      |          |          |          |          |  |     |          |          |          |          |          |     |          |          |          |          |          |     |          |          |          |          |          |     |          |          |          |          |          |     |          |          |          |          |          |      |          |          |          |          |          |  |   |   |   |   |    |     |          |  |  |  |  |     |          |          |  |  |  |     |          |          |          |  |  |     |          |          |          |          |  |      |          |          |          |          |          |
| 6 B                                                                                                                                                | 0.000000                                                                                                                                                                                                                                                                                                                                                                                                                                                                                                                                                                                                                                                                                                                                                                                                                                                                                                                                                                                                                                                                                                                                                                                                                                                                                                                                                                                                                                                                                                                                                                                                                                                                                                                       |          |          |          |          |   |   |     |          |  |  |  |  |      |          |          |  |  |  |     |          |          |          |  |  |      |          |          |          |          |  |     |          |          |          |          |          |     |          |          |          |          |          |     |          |          |          |          |          |     |          |          |          |          |          |     |          |          |          |          |          |      |          |          |          |          |          |  |   |   |   |   |    |     |          |  |  |  |  |     |          |          |  |  |  |     |          |          |          |  |  |     |          |          |          |          |  |      |          |          |          |          |          |
| 7 B                                                                                                                                                | 1.960754                                                                                                                                                                                                                                                                                                                                                                                                                                                                                                                                                                                                                                                                                                                                                                                                                                                                                                                                                                                                                                                                                                                                                                                                                                                                                                                                                                                                                                                                                                                                                                                                                                                                                                                       | 0.000000 |          |          |          |   |   |     |          |  |  |  |  |      |          |          |  |  |  |     |          |          |          |  |  |      |          |          |          |          |  |     |          |          |          |          |          |     |          |          |          |          |          |     |          |          |          |          |          |     |          |          |          |          |          |     |          |          |          |          |          |      |          |          |          |          |          |  |   |   |   |   |    |     |          |  |  |  |  |     |          |          |  |  |  |     |          |          |          |  |  |     |          |          |          |          |  |      |          |          |          |          |          |
| 8 B                                                                                                                                                | 2.612556                                                                                                                                                                                                                                                                                                                                                                                                                                                                                                                                                                                                                                                                                                                                                                                                                                                                                                                                                                                                                                                                                                                                                                                                                                                                                                                                                                                                                                                                                                                                                                                                                                                                                                                       | 1.816034 | 0.000000 |          |          |   |   |     |          |  |  |  |  |      |          |          |  |  |  |     |          |          |          |  |  |      |          |          |          |          |  |     |          |          |          |          |          |     |          |          |          |          |          |     |          |          |          |          |          |     |          |          |          |          |          |     |          |          |          |          |          |      |          |          |          |          |          |  |   |   |   |   |    |     |          |  |  |  |  |     |          |          |  |  |  |     |          |          |          |  |  |     |          |          |          |          |  |      |          |          |          |          |          |
| 9 C                                                                                                                                                | 1.581350                                                                                                                                                                                                                                                                                                                                                                                                                                                                                                                                                                                                                                                                                                                                                                                                                                                                                                                                                                                                                                                                                                                                                                                                                                                                                                                                                                                                                                                                                                                                                                                                                                                                                                                       | 1.592834 | 1.622045 | 0.000000 |          |   |   |     |          |  |  |  |  |      |          |          |  |  |  |     |          |          |          |  |  |      |          |          |          |          |  |     |          |          |          |          |          |     |          |          |          |          |          |     |          |          |          |          |          |     |          |          |          |          |          |     |          |          |          |          |          |      |          |          |          |          |          |  |   |   |   |   |    |     |          |  |  |  |  |     |          |          |  |  |  |     |          |          |          |  |  |     |          |          |          |          |  |      |          |          |          |          |          |
| 10 B                                                                                                                                               | 3.091236                                                                                                                                                                                                                                                                                                                                                                                                                                                                                                                                                                                                                                                                                                                                                                                                                                                                                                                                                                                                                                                                                                                                                                                                                                                                                                                                                                                                                                                                                                                                                                                                                                                                                                                       | 3.166890 | 2.986546 | 3.671240 | 0.000000 |   |   |     |          |  |  |  |  |      |          |          |  |  |  |     |          |          |          |  |  |      |          |          |          |          |  |     |          |          |          |          |          |     |          |          |          |          |          |     |          |          |          |          |          |     |          |          |          |          |          |     |          |          |          |          |          |      |          |          |          |          |          |  |   |   |   |   |    |     |          |  |  |  |  |     |          |          |  |  |  |     |          |          |          |  |  |     |          |          |          |          |  |      |          |          |          |          |          |

| 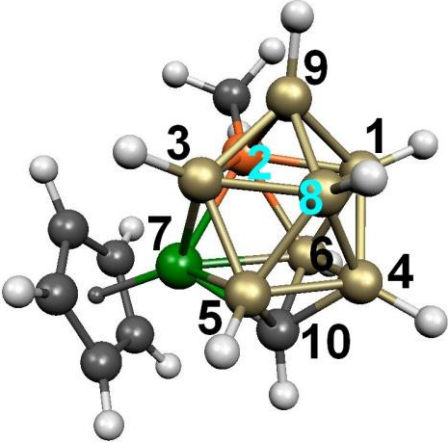 <p>3. -2055.17131630 +2.4<br/>C<sub>1</sub> H/L 2.60</p>   | <table border="1"> <thead> <tr> <th></th> <th>1</th> <th>2</th> <th>3</th> <th>4</th> <th>5</th> </tr> </thead> <tbody> <tr><td>1 B</td><td>0.000000</td><td></td><td></td><td></td><td></td></tr> <tr><td>2 P</td><td>2.018078</td><td>0.000000</td><td></td><td></td><td></td></tr> <tr><td>3 B</td><td>2.685607</td><td>2.058168</td><td>0.000000</td><td></td><td></td></tr> <tr><td>4 B</td><td>1.772200</td><td>2.990854</td><td>2.852465</td><td>0.000000</td><td></td></tr> <tr><td>5 B</td><td>2.829666</td><td>2.969878</td><td>1.778180</td><td>1.833461</td><td>0.000000</td></tr> <tr><td>6 B</td><td>1.883340</td><td>2.006653</td><td>2.991583</td><td>1.811090</td><td>2.587074</td></tr> <tr><td>7 Fe</td><td>3.281702</td><td>2.122049</td><td>2.162606</td><td>3.009126</td><td>2.138487</td></tr> <tr><td>8 B</td><td>1.798002</td><td>2.727053</td><td>1.795889</td><td>1.782708</td><td>1.806435</td></tr> <tr><td>9 B</td><td>1.760046</td><td>1.876025</td><td>1.786112</td><td>2.936104</td><td>2.950188</td></tr> <tr><td>10 C</td><td>2.799442</td><td>2.952557</td><td>2.857080</td><td>1.599327</td><td>1.599785</td></tr> <tr> <th></th> <th>6</th> <th>7</th> <th>8</th> <th>9</th> <th>10</th> </tr> <tr><td>6 B</td><td>0.000000</td><td></td><td></td><td></td><td></td></tr> <tr><td>7 Fe</td><td>2.175051</td><td>0.000000</td><td></td><td></td><td></td></tr> <tr><td>8 B</td><td>2.846152</td><td>3.233747</td><td>0.000000</td><td></td><td></td></tr> <tr><td>9 B</td><td>3.069191</td><td>3.348235</td><td>1.678270</td><td>0.000000</td><td></td></tr> <tr><td>10 C</td><td>1.585797</td><td>1.918744</td><td>2.769145</td><td>3.646416</td><td>0.000000</td></tr> </tbody> </table> |          | 1        | 2        | 3        | 4 | 5 | 1 B | 0.000000 |  |  |  |  | 2 P  | 2.018078 | 0.000000 |  |  |  | 3 B | 2.685607 | 2.058168 | 0.000000 |  |  | 4 B | 1.772200 | 2.990854 | 2.852465 | 0.000000 |  | 5 B | 2.829666 | 2.969878 | 1.778180 | 1.833461 | 0.000000 | 6 B | 1.883340 | 2.006653 | 2.991583 | 1.811090 | 2.587074 | 7 Fe | 3.281702 | 2.122049 | 2.162606 | 3.009126 | 2.138487 | 8 B | 1.798002 | 2.727053 | 1.795889 | 1.782708 | 1.806435 | 9 B | 1.760046 | 1.876025 | 1.786112 | 2.936104 | 2.950188 | 10 C | 2.799442 | 2.952557 | 2.857080 | 1.599327 | 1.599785 |  | 6 | 7 | 8 | 9 | 10 | 6 B | 0.000000 |  |  |  |  | 7 Fe | 2.175051 | 0.000000 |  |  |  | 8 B | 2.846152 | 3.233747 | 0.000000 |  |  | 9 B | 3.069191 | 3.348235 | 1.678270 | 0.000000 |  | 10 C | 1.585797 | 1.918744 | 2.769145 | 3.646416 | 0.000000 |
|----------------------------------------------------------------------------------------------------------------------------------------------|---------------------------------------------------------------------------------------------------------------------------------------------------------------------------------------------------------------------------------------------------------------------------------------------------------------------------------------------------------------------------------------------------------------------------------------------------------------------------------------------------------------------------------------------------------------------------------------------------------------------------------------------------------------------------------------------------------------------------------------------------------------------------------------------------------------------------------------------------------------------------------------------------------------------------------------------------------------------------------------------------------------------------------------------------------------------------------------------------------------------------------------------------------------------------------------------------------------------------------------------------------------------------------------------------------------------------------------------------------------------------------------------------------------------------------------------------------------------------------------------------------------------------------------------------------------------------------------------------------------------------------------------------------------------------------------------------------------------------------|----------|----------|----------|----------|---|---|-----|----------|--|--|--|--|------|----------|----------|--|--|--|-----|----------|----------|----------|--|--|-----|----------|----------|----------|----------|--|-----|----------|----------|----------|----------|----------|-----|----------|----------|----------|----------|----------|------|----------|----------|----------|----------|----------|-----|----------|----------|----------|----------|----------|-----|----------|----------|----------|----------|----------|------|----------|----------|----------|----------|----------|--|---|---|---|---|----|-----|----------|--|--|--|--|------|----------|----------|--|--|--|-----|----------|----------|----------|--|--|-----|----------|----------|----------|----------|--|------|----------|----------|----------|----------|----------|
|                                                                                                                                              | 1                                                                                                                                                                                                                                                                                                                                                                                                                                                                                                                                                                                                                                                                                                                                                                                                                                                                                                                                                                                                                                                                                                                                                                                                                                                                                                                                                                                                                                                                                                                                                                                                                                                                                                                               | 2        | 3        | 4        | 5        |   |   |     |          |  |  |  |  |      |          |          |  |  |  |     |          |          |          |  |  |     |          |          |          |          |  |     |          |          |          |          |          |     |          |          |          |          |          |      |          |          |          |          |          |     |          |          |          |          |          |     |          |          |          |          |          |      |          |          |          |          |          |  |   |   |   |   |    |     |          |  |  |  |  |      |          |          |  |  |  |     |          |          |          |  |  |     |          |          |          |          |  |      |          |          |          |          |          |
| 1 B                                                                                                                                          | 0.000000                                                                                                                                                                                                                                                                                                                                                                                                                                                                                                                                                                                                                                                                                                                                                                                                                                                                                                                                                                                                                                                                                                                                                                                                                                                                                                                                                                                                                                                                                                                                                                                                                                                                                                                        |          |          |          |          |   |   |     |          |  |  |  |  |      |          |          |  |  |  |     |          |          |          |  |  |     |          |          |          |          |  |     |          |          |          |          |          |     |          |          |          |          |          |      |          |          |          |          |          |     |          |          |          |          |          |     |          |          |          |          |          |      |          |          |          |          |          |  |   |   |   |   |    |     |          |  |  |  |  |      |          |          |  |  |  |     |          |          |          |  |  |     |          |          |          |          |  |      |          |          |          |          |          |
| 2 P                                                                                                                                          | 2.018078                                                                                                                                                                                                                                                                                                                                                                                                                                                                                                                                                                                                                                                                                                                                                                                                                                                                                                                                                                                                                                                                                                                                                                                                                                                                                                                                                                                                                                                                                                                                                                                                                                                                                                                        | 0.000000 |          |          |          |   |   |     |          |  |  |  |  |      |          |          |  |  |  |     |          |          |          |  |  |     |          |          |          |          |  |     |          |          |          |          |          |     |          |          |          |          |          |      |          |          |          |          |          |     |          |          |          |          |          |     |          |          |          |          |          |      |          |          |          |          |          |  |   |   |   |   |    |     |          |  |  |  |  |      |          |          |  |  |  |     |          |          |          |  |  |     |          |          |          |          |  |      |          |          |          |          |          |
| 3 B                                                                                                                                          | 2.685607                                                                                                                                                                                                                                                                                                                                                                                                                                                                                                                                                                                                                                                                                                                                                                                                                                                                                                                                                                                                                                                                                                                                                                                                                                                                                                                                                                                                                                                                                                                                                                                                                                                                                                                        | 2.058168 | 0.000000 |          |          |   |   |     |          |  |  |  |  |      |          |          |  |  |  |     |          |          |          |  |  |     |          |          |          |          |  |     |          |          |          |          |          |     |          |          |          |          |          |      |          |          |          |          |          |     |          |          |          |          |          |     |          |          |          |          |          |      |          |          |          |          |          |  |   |   |   |   |    |     |          |  |  |  |  |      |          |          |  |  |  |     |          |          |          |  |  |     |          |          |          |          |  |      |          |          |          |          |          |
| 4 B                                                                                                                                          | 1.772200                                                                                                                                                                                                                                                                                                                                                                                                                                                                                                                                                                                                                                                                                                                                                                                                                                                                                                                                                                                                                                                                                                                                                                                                                                                                                                                                                                                                                                                                                                                                                                                                                                                                                                                        | 2.990854 | 2.852465 | 0.000000 |          |   |   |     |          |  |  |  |  |      |          |          |  |  |  |     |          |          |          |  |  |     |          |          |          |          |  |     |          |          |          |          |          |     |          |          |          |          |          |      |          |          |          |          |          |     |          |          |          |          |          |     |          |          |          |          |          |      |          |          |          |          |          |  |   |   |   |   |    |     |          |  |  |  |  |      |          |          |  |  |  |     |          |          |          |  |  |     |          |          |          |          |  |      |          |          |          |          |          |
| 5 B                                                                                                                                          | 2.829666                                                                                                                                                                                                                                                                                                                                                                                                                                                                                                                                                                                                                                                                                                                                                                                                                                                                                                                                                                                                                                                                                                                                                                                                                                                                                                                                                                                                                                                                                                                                                                                                                                                                                                                        | 2.969878 | 1.778180 | 1.833461 | 0.000000 |   |   |     |          |  |  |  |  |      |          |          |  |  |  |     |          |          |          |  |  |     |          |          |          |          |  |     |          |          |          |          |          |     |          |          |          |          |          |      |          |          |          |          |          |     |          |          |          |          |          |     |          |          |          |          |          |      |          |          |          |          |          |  |   |   |   |   |    |     |          |  |  |  |  |      |          |          |  |  |  |     |          |          |          |  |  |     |          |          |          |          |  |      |          |          |          |          |          |
| 6 B                                                                                                                                          | 1.883340                                                                                                                                                                                                                                                                                                                                                                                                                                                                                                                                                                                                                                                                                                                                                                                                                                                                                                                                                                                                                                                                                                                                                                                                                                                                                                                                                                                                                                                                                                                                                                                                                                                                                                                        | 2.006653 | 2.991583 | 1.811090 | 2.587074 |   |   |     |          |  |  |  |  |      |          |          |  |  |  |     |          |          |          |  |  |     |          |          |          |          |  |     |          |          |          |          |          |     |          |          |          |          |          |      |          |          |          |          |          |     |          |          |          |          |          |     |          |          |          |          |          |      |          |          |          |          |          |  |   |   |   |   |    |     |          |  |  |  |  |      |          |          |  |  |  |     |          |          |          |  |  |     |          |          |          |          |  |      |          |          |          |          |          |
| 7 Fe                                                                                                                                         | 3.281702                                                                                                                                                                                                                                                                                                                                                                                                                                                                                                                                                                                                                                                                                                                                                                                                                                                                                                                                                                                                                                                                                                                                                                                                                                                                                                                                                                                                                                                                                                                                                                                                                                                                                                                        | 2.122049 | 2.162606 | 3.009126 | 2.138487 |   |   |     |          |  |  |  |  |      |          |          |  |  |  |     |          |          |          |  |  |     |          |          |          |          |  |     |          |          |          |          |          |     |          |          |          |          |          |      |          |          |          |          |          |     |          |          |          |          |          |     |          |          |          |          |          |      |          |          |          |          |          |  |   |   |   |   |    |     |          |  |  |  |  |      |          |          |  |  |  |     |          |          |          |  |  |     |          |          |          |          |  |      |          |          |          |          |          |
| 8 B                                                                                                                                          | 1.798002                                                                                                                                                                                                                                                                                                                                                                                                                                                                                                                                                                                                                                                                                                                                                                                                                                                                                                                                                                                                                                                                                                                                                                                                                                                                                                                                                                                                                                                                                                                                                                                                                                                                                                                        | 2.727053 | 1.795889 | 1.782708 | 1.806435 |   |   |     |          |  |  |  |  |      |          |          |  |  |  |     |          |          |          |  |  |     |          |          |          |          |  |     |          |          |          |          |          |     |          |          |          |          |          |      |          |          |          |          |          |     |          |          |          |          |          |     |          |          |          |          |          |      |          |          |          |          |          |  |   |   |   |   |    |     |          |  |  |  |  |      |          |          |  |  |  |     |          |          |          |  |  |     |          |          |          |          |  |      |          |          |          |          |          |
| 9 B                                                                                                                                          | 1.760046                                                                                                                                                                                                                                                                                                                                                                                                                                                                                                                                                                                                                                                                                                                                                                                                                                                                                                                                                                                                                                                                                                                                                                                                                                                                                                                                                                                                                                                                                                                                                                                                                                                                                                                        | 1.876025 | 1.786112 | 2.936104 | 2.950188 |   |   |     |          |  |  |  |  |      |          |          |  |  |  |     |          |          |          |  |  |     |          |          |          |          |  |     |          |          |          |          |          |     |          |          |          |          |          |      |          |          |          |          |          |     |          |          |          |          |          |     |          |          |          |          |          |      |          |          |          |          |          |  |   |   |   |   |    |     |          |  |  |  |  |      |          |          |  |  |  |     |          |          |          |  |  |     |          |          |          |          |  |      |          |          |          |          |          |
| 10 C                                                                                                                                         | 2.799442                                                                                                                                                                                                                                                                                                                                                                                                                                                                                                                                                                                                                                                                                                                                                                                                                                                                                                                                                                                                                                                                                                                                                                                                                                                                                                                                                                                                                                                                                                                                                                                                                                                                                                                        | 2.952557 | 2.857080 | 1.599327 | 1.599785 |   |   |     |          |  |  |  |  |      |          |          |  |  |  |     |          |          |          |  |  |     |          |          |          |          |  |     |          |          |          |          |          |     |          |          |          |          |          |      |          |          |          |          |          |     |          |          |          |          |          |     |          |          |          |          |          |      |          |          |          |          |          |  |   |   |   |   |    |     |          |  |  |  |  |      |          |          |  |  |  |     |          |          |          |  |  |     |          |          |          |          |  |      |          |          |          |          |          |
|                                                                                                                                              | 6                                                                                                                                                                                                                                                                                                                                                                                                                                                                                                                                                                                                                                                                                                                                                                                                                                                                                                                                                                                                                                                                                                                                                                                                                                                                                                                                                                                                                                                                                                                                                                                                                                                                                                                               | 7        | 8        | 9        | 10       |   |   |     |          |  |  |  |  |      |          |          |  |  |  |     |          |          |          |  |  |     |          |          |          |          |  |     |          |          |          |          |          |     |          |          |          |          |          |      |          |          |          |          |          |     |          |          |          |          |          |     |          |          |          |          |          |      |          |          |          |          |          |  |   |   |   |   |    |     |          |  |  |  |  |      |          |          |  |  |  |     |          |          |          |  |  |     |          |          |          |          |  |      |          |          |          |          |          |
| 6 B                                                                                                                                          | 0.000000                                                                                                                                                                                                                                                                                                                                                                                                                                                                                                                                                                                                                                                                                                                                                                                                                                                                                                                                                                                                                                                                                                                                                                                                                                                                                                                                                                                                                                                                                                                                                                                                                                                                                                                        |          |          |          |          |   |   |     |          |  |  |  |  |      |          |          |  |  |  |     |          |          |          |  |  |     |          |          |          |          |  |     |          |          |          |          |          |     |          |          |          |          |          |      |          |          |          |          |          |     |          |          |          |          |          |     |          |          |          |          |          |      |          |          |          |          |          |  |   |   |   |   |    |     |          |  |  |  |  |      |          |          |  |  |  |     |          |          |          |  |  |     |          |          |          |          |  |      |          |          |          |          |          |
| 7 Fe                                                                                                                                         | 2.175051                                                                                                                                                                                                                                                                                                                                                                                                                                                                                                                                                                                                                                                                                                                                                                                                                                                                                                                                                                                                                                                                                                                                                                                                                                                                                                                                                                                                                                                                                                                                                                                                                                                                                                                        | 0.000000 |          |          |          |   |   |     |          |  |  |  |  |      |          |          |  |  |  |     |          |          |          |  |  |     |          |          |          |          |  |     |          |          |          |          |          |     |          |          |          |          |          |      |          |          |          |          |          |     |          |          |          |          |          |     |          |          |          |          |          |      |          |          |          |          |          |  |   |   |   |   |    |     |          |  |  |  |  |      |          |          |  |  |  |     |          |          |          |  |  |     |          |          |          |          |  |      |          |          |          |          |          |
| 8 B                                                                                                                                          | 2.846152                                                                                                                                                                                                                                                                                                                                                                                                                                                                                                                                                                                                                                                                                                                                                                                                                                                                                                                                                                                                                                                                                                                                                                                                                                                                                                                                                                                                                                                                                                                                                                                                                                                                                                                        | 3.233747 | 0.000000 |          |          |   |   |     |          |  |  |  |  |      |          |          |  |  |  |     |          |          |          |  |  |     |          |          |          |          |  |     |          |          |          |          |          |     |          |          |          |          |          |      |          |          |          |          |          |     |          |          |          |          |          |     |          |          |          |          |          |      |          |          |          |          |          |  |   |   |   |   |    |     |          |  |  |  |  |      |          |          |  |  |  |     |          |          |          |  |  |     |          |          |          |          |  |      |          |          |          |          |          |
| 9 B                                                                                                                                          | 3.069191                                                                                                                                                                                                                                                                                                                                                                                                                                                                                                                                                                                                                                                                                                                                                                                                                                                                                                                                                                                                                                                                                                                                                                                                                                                                                                                                                                                                                                                                                                                                                                                                                                                                                                                        | 3.348235 | 1.678270 | 0.000000 |          |   |   |     |          |  |  |  |  |      |          |          |  |  |  |     |          |          |          |  |  |     |          |          |          |          |  |     |          |          |          |          |          |     |          |          |          |          |          |      |          |          |          |          |          |     |          |          |          |          |          |     |          |          |          |          |          |      |          |          |          |          |          |  |   |   |   |   |    |     |          |  |  |  |  |      |          |          |  |  |  |     |          |          |          |  |  |     |          |          |          |          |  |      |          |          |          |          |          |
| 10 C                                                                                                                                         | 1.585797                                                                                                                                                                                                                                                                                                                                                                                                                                                                                                                                                                                                                                                                                                                                                                                                                                                                                                                                                                                                                                                                                                                                                                                                                                                                                                                                                                                                                                                                                                                                                                                                                                                                                                                        | 1.918744 | 2.769145 | 3.646416 | 0.000000 |   |   |     |          |  |  |  |  |      |          |          |  |  |  |     |          |          |          |  |  |     |          |          |          |          |  |     |          |          |          |          |          |     |          |          |          |          |          |      |          |          |          |          |          |     |          |          |          |          |          |     |          |          |          |          |          |      |          |          |          |          |          |  |   |   |   |   |    |     |          |  |  |  |  |      |          |          |  |  |  |     |          |          |          |  |  |     |          |          |          |          |  |      |          |          |          |          |          |
|  <p>4. -2055.15165010 +14.7<br/>C<sub>1</sub> H/L 2.84</p> | <table border="1"> <thead> <tr> <th></th> <th>1</th> <th>2</th> <th>3</th> <th>4</th> <th>5</th> </tr> </thead> <tbody> <tr><td>1 B</td><td>0.000000</td><td></td><td></td><td></td><td></td></tr> <tr><td>2 Fe</td><td>2.210142</td><td>0.000000</td><td></td><td></td><td></td></tr> <tr><td>3 C</td><td>2.500007</td><td>2.080395</td><td>0.000000</td><td></td><td></td></tr> <tr><td>4 B</td><td>1.784065</td><td>2.977187</td><td>1.732810</td><td>0.000000</td><td></td></tr> <tr><td>5 P</td><td>1.977853</td><td>2.120269</td><td>2.883381</td><td>2.956244</td><td>0.000000</td></tr> <tr><td>6 B</td><td>3.001090</td><td>2.097059</td><td>1.658823</td><td>2.807891</td><td>2.150704</td></tr> <tr><td>7 B</td><td>2.839058</td><td>3.199358</td><td>1.710072</td><td>1.766611</td><td>2.746790</td></tr> <tr><td>8 B</td><td>1.889637</td><td>3.279226</td><td>2.698578</td><td>1.751047</td><td>2.019247</td></tr> <tr><td>9 B</td><td>3.050998</td><td>3.258708</td><td>2.807761</td><td>2.918415</td><td>1.866734</td></tr> <tr><td>10 B</td><td>1.711494</td><td>1.950637</td><td>1.637512</td><td>1.712845</td><td>3.062166</td></tr> <tr> <th></th> <th>6</th> <th>7</th> <th>8</th> <th>9</th> <th>10</th> </tr> <tr><td>6 B</td><td>0.000000</td><td></td><td></td><td></td><td></td></tr> <tr><td>7 B</td><td>1.790295</td><td>0.000000</td><td></td><td></td><td></td></tr> <tr><td>8 B</td><td>2.704398</td><td>1.774031</td><td>0.000000</td><td></td><td></td></tr> <tr><td>9 B</td><td>1.782141</td><td>1.683541</td><td>1.776377</td><td>0.000000</td><td></td></tr> <tr><td>10 B</td><td>2.911120</td><td>2.892233</td><td>2.956784</td><td>3.756612</td><td>0.000000</td></tr> </tbody> </table>  |          | 1        | 2        | 3        | 4 | 5 | 1 B | 0.000000 |  |  |  |  | 2 Fe | 2.210142 | 0.000000 |  |  |  | 3 C | 2.500007 | 2.080395 | 0.000000 |  |  | 4 B | 1.784065 | 2.977187 | 1.732810 | 0.000000 |  | 5 P | 1.977853 | 2.120269 | 2.883381 | 2.956244 | 0.000000 | 6 B | 3.001090 | 2.097059 | 1.658823 | 2.807891 | 2.150704 | 7 B  | 2.839058 | 3.199358 | 1.710072 | 1.766611 | 2.746790 | 8 B | 1.889637 | 3.279226 | 2.698578 | 1.751047 | 2.019247 | 9 B | 3.050998 | 3.258708 | 2.807761 | 2.918415 | 1.866734 | 10 B | 1.711494 | 1.950637 | 1.637512 | 1.712845 | 3.062166 |  | 6 | 7 | 8 | 9 | 10 | 6 B | 0.000000 |  |  |  |  | 7 B  | 1.790295 | 0.000000 |  |  |  | 8 B | 2.704398 | 1.774031 | 0.000000 |  |  | 9 B | 1.782141 | 1.683541 | 1.776377 | 0.000000 |  | 10 B | 2.911120 | 2.892233 | 2.956784 | 3.756612 | 0.000000 |
|                                                                                                                                              | 1                                                                                                                                                                                                                                                                                                                                                                                                                                                                                                                                                                                                                                                                                                                                                                                                                                                                                                                                                                                                                                                                                                                                                                                                                                                                                                                                                                                                                                                                                                                                                                                                                                                                                                                               | 2        | 3        | 4        | 5        |   |   |     |          |  |  |  |  |      |          |          |  |  |  |     |          |          |          |  |  |     |          |          |          |          |  |     |          |          |          |          |          |     |          |          |          |          |          |      |          |          |          |          |          |     |          |          |          |          |          |     |          |          |          |          |          |      |          |          |          |          |          |  |   |   |   |   |    |     |          |  |  |  |  |      |          |          |  |  |  |     |          |          |          |  |  |     |          |          |          |          |  |      |          |          |          |          |          |
| 1 B                                                                                                                                          | 0.000000                                                                                                                                                                                                                                                                                                                                                                                                                                                                                                                                                                                                                                                                                                                                                                                                                                                                                                                                                                                                                                                                                                                                                                                                                                                                                                                                                                                                                                                                                                                                                                                                                                                                                                                        |          |          |          |          |   |   |     |          |  |  |  |  |      |          |          |  |  |  |     |          |          |          |  |  |     |          |          |          |          |  |     |          |          |          |          |          |     |          |          |          |          |          |      |          |          |          |          |          |     |          |          |          |          |          |     |          |          |          |          |          |      |          |          |          |          |          |  |   |   |   |   |    |     |          |  |  |  |  |      |          |          |  |  |  |     |          |          |          |  |  |     |          |          |          |          |  |      |          |          |          |          |          |
| 2 Fe                                                                                                                                         | 2.210142                                                                                                                                                                                                                                                                                                                                                                                                                                                                                                                                                                                                                                                                                                                                                                                                                                                                                                                                                                                                                                                                                                                                                                                                                                                                                                                                                                                                                                                                                                                                                                                                                                                                                                                        | 0.000000 |          |          |          |   |   |     |          |  |  |  |  |      |          |          |  |  |  |     |          |          |          |  |  |     |          |          |          |          |  |     |          |          |          |          |          |     |          |          |          |          |          |      |          |          |          |          |          |     |          |          |          |          |          |     |          |          |          |          |          |      |          |          |          |          |          |  |   |   |   |   |    |     |          |  |  |  |  |      |          |          |  |  |  |     |          |          |          |  |  |     |          |          |          |          |  |      |          |          |          |          |          |
| 3 C                                                                                                                                          | 2.500007                                                                                                                                                                                                                                                                                                                                                                                                                                                                                                                                                                                                                                                                                                                                                                                                                                                                                                                                                                                                                                                                                                                                                                                                                                                                                                                                                                                                                                                                                                                                                                                                                                                                                                                        | 2.080395 | 0.000000 |          |          |   |   |     |          |  |  |  |  |      |          |          |  |  |  |     |          |          |          |  |  |     |          |          |          |          |  |     |          |          |          |          |          |     |          |          |          |          |          |      |          |          |          |          |          |     |          |          |          |          |          |     |          |          |          |          |          |      |          |          |          |          |          |  |   |   |   |   |    |     |          |  |  |  |  |      |          |          |  |  |  |     |          |          |          |  |  |     |          |          |          |          |  |      |          |          |          |          |          |
| 4 B                                                                                                                                          | 1.784065                                                                                                                                                                                                                                                                                                                                                                                                                                                                                                                                                                                                                                                                                                                                                                                                                                                                                                                                                                                                                                                                                                                                                                                                                                                                                                                                                                                                                                                                                                                                                                                                                                                                                                                        | 2.977187 | 1.732810 | 0.000000 |          |   |   |     |          |  |  |  |  |      |          |          |  |  |  |     |          |          |          |  |  |     |          |          |          |          |  |     |          |          |          |          |          |     |          |          |          |          |          |      |          |          |          |          |          |     |          |          |          |          |          |     |          |          |          |          |          |      |          |          |          |          |          |  |   |   |   |   |    |     |          |  |  |  |  |      |          |          |  |  |  |     |          |          |          |  |  |     |          |          |          |          |  |      |          |          |          |          |          |
| 5 P                                                                                                                                          | 1.977853                                                                                                                                                                                                                                                                                                                                                                                                                                                                                                                                                                                                                                                                                                                                                                                                                                                                                                                                                                                                                                                                                                                                                                                                                                                                                                                                                                                                                                                                                                                                                                                                                                                                                                                        | 2.120269 | 2.883381 | 2.956244 | 0.000000 |   |   |     |          |  |  |  |  |      |          |          |  |  |  |     |          |          |          |  |  |     |          |          |          |          |  |     |          |          |          |          |          |     |          |          |          |          |          |      |          |          |          |          |          |     |          |          |          |          |          |     |          |          |          |          |          |      |          |          |          |          |          |  |   |   |   |   |    |     |          |  |  |  |  |      |          |          |  |  |  |     |          |          |          |  |  |     |          |          |          |          |  |      |          |          |          |          |          |
| 6 B                                                                                                                                          | 3.001090                                                                                                                                                                                                                                                                                                                                                                                                                                                                                                                                                                                                                                                                                                                                                                                                                                                                                                                                                                                                                                                                                                                                                                                                                                                                                                                                                                                                                                                                                                                                                                                                                                                                                                                        | 2.097059 | 1.658823 | 2.807891 | 2.150704 |   |   |     |          |  |  |  |  |      |          |          |  |  |  |     |          |          |          |  |  |     |          |          |          |          |  |     |          |          |          |          |          |     |          |          |          |          |          |      |          |          |          |          |          |     |          |          |          |          |          |     |          |          |          |          |          |      |          |          |          |          |          |  |   |   |   |   |    |     |          |  |  |  |  |      |          |          |  |  |  |     |          |          |          |  |  |     |          |          |          |          |  |      |          |          |          |          |          |
| 7 B                                                                                                                                          | 2.839058                                                                                                                                                                                                                                                                                                                                                                                                                                                                                                                                                                                                                                                                                                                                                                                                                                                                                                                                                                                                                                                                                                                                                                                                                                                                                                                                                                                                                                                                                                                                                                                                                                                                                                                        | 3.199358 | 1.710072 | 1.766611 | 2.746790 |   |   |     |          |  |  |  |  |      |          |          |  |  |  |     |          |          |          |  |  |     |          |          |          |          |  |     |          |          |          |          |          |     |          |          |          |          |          |      |          |          |          |          |          |     |          |          |          |          |          |     |          |          |          |          |          |      |          |          |          |          |          |  |   |   |   |   |    |     |          |  |  |  |  |      |          |          |  |  |  |     |          |          |          |  |  |     |          |          |          |          |  |      |          |          |          |          |          |
| 8 B                                                                                                                                          | 1.889637                                                                                                                                                                                                                                                                                                                                                                                                                                                                                                                                                                                                                                                                                                                                                                                                                                                                                                                                                                                                                                                                                                                                                                                                                                                                                                                                                                                                                                                                                                                                                                                                                                                                                                                        | 3.279226 | 2.698578 | 1.751047 | 2.019247 |   |   |     |          |  |  |  |  |      |          |          |  |  |  |     |          |          |          |  |  |     |          |          |          |          |  |     |          |          |          |          |          |     |          |          |          |          |          |      |          |          |          |          |          |     |          |          |          |          |          |     |          |          |          |          |          |      |          |          |          |          |          |  |   |   |   |   |    |     |          |  |  |  |  |      |          |          |  |  |  |     |          |          |          |  |  |     |          |          |          |          |  |      |          |          |          |          |          |
| 9 B                                                                                                                                          | 3.050998                                                                                                                                                                                                                                                                                                                                                                                                                                                                                                                                                                                                                                                                                                                                                                                                                                                                                                                                                                                                                                                                                                                                                                                                                                                                                                                                                                                                                                                                                                                                                                                                                                                                                                                        | 3.258708 | 2.807761 | 2.918415 | 1.866734 |   |   |     |          |  |  |  |  |      |          |          |  |  |  |     |          |          |          |  |  |     |          |          |          |          |  |     |          |          |          |          |          |     |          |          |          |          |          |      |          |          |          |          |          |     |          |          |          |          |          |     |          |          |          |          |          |      |          |          |          |          |          |  |   |   |   |   |    |     |          |  |  |  |  |      |          |          |  |  |  |     |          |          |          |  |  |     |          |          |          |          |  |      |          |          |          |          |          |
| 10 B                                                                                                                                         | 1.711494                                                                                                                                                                                                                                                                                                                                                                                                                                                                                                                                                                                                                                                                                                                                                                                                                                                                                                                                                                                                                                                                                                                                                                                                                                                                                                                                                                                                                                                                                                                                                                                                                                                                                                                        | 1.950637 | 1.637512 | 1.712845 | 3.062166 |   |   |     |          |  |  |  |  |      |          |          |  |  |  |     |          |          |          |  |  |     |          |          |          |          |  |     |          |          |          |          |          |     |          |          |          |          |          |      |          |          |          |          |          |     |          |          |          |          |          |     |          |          |          |          |          |      |          |          |          |          |          |  |   |   |   |   |    |     |          |  |  |  |  |      |          |          |  |  |  |     |          |          |          |  |  |     |          |          |          |          |  |      |          |          |          |          |          |
|                                                                                                                                              | 6                                                                                                                                                                                                                                                                                                                                                                                                                                                                                                                                                                                                                                                                                                                                                                                                                                                                                                                                                                                                                                                                                                                                                                                                                                                                                                                                                                                                                                                                                                                                                                                                                                                                                                                               | 7        | 8        | 9        | 10       |   |   |     |          |  |  |  |  |      |          |          |  |  |  |     |          |          |          |  |  |     |          |          |          |          |  |     |          |          |          |          |          |     |          |          |          |          |          |      |          |          |          |          |          |     |          |          |          |          |          |     |          |          |          |          |          |      |          |          |          |          |          |  |   |   |   |   |    |     |          |  |  |  |  |      |          |          |  |  |  |     |          |          |          |  |  |     |          |          |          |          |  |      |          |          |          |          |          |
| 6 B                                                                                                                                          | 0.000000                                                                                                                                                                                                                                                                                                                                                                                                                                                                                                                                                                                                                                                                                                                                                                                                                                                                                                                                                                                                                                                                                                                                                                                                                                                                                                                                                                                                                                                                                                                                                                                                                                                                                                                        |          |          |          |          |   |   |     |          |  |  |  |  |      |          |          |  |  |  |     |          |          |          |  |  |     |          |          |          |          |  |     |          |          |          |          |          |     |          |          |          |          |          |      |          |          |          |          |          |     |          |          |          |          |          |     |          |          |          |          |          |      |          |          |          |          |          |  |   |   |   |   |    |     |          |  |  |  |  |      |          |          |  |  |  |     |          |          |          |  |  |     |          |          |          |          |  |      |          |          |          |          |          |
| 7 B                                                                                                                                          | 1.790295                                                                                                                                                                                                                                                                                                                                                                                                                                                                                                                                                                                                                                                                                                                                                                                                                                                                                                                                                                                                                                                                                                                                                                                                                                                                                                                                                                                                                                                                                                                                                                                                                                                                                                                        | 0.000000 |          |          |          |   |   |     |          |  |  |  |  |      |          |          |  |  |  |     |          |          |          |  |  |     |          |          |          |          |  |     |          |          |          |          |          |     |          |          |          |          |          |      |          |          |          |          |          |     |          |          |          |          |          |     |          |          |          |          |          |      |          |          |          |          |          |  |   |   |   |   |    |     |          |  |  |  |  |      |          |          |  |  |  |     |          |          |          |  |  |     |          |          |          |          |  |      |          |          |          |          |          |
| 8 B                                                                                                                                          | 2.704398                                                                                                                                                                                                                                                                                                                                                                                                                                                                                                                                                                                                                                                                                                                                                                                                                                                                                                                                                                                                                                                                                                                                                                                                                                                                                                                                                                                                                                                                                                                                                                                                                                                                                                                        | 1.774031 | 0.000000 |          |          |   |   |     |          |  |  |  |  |      |          |          |  |  |  |     |          |          |          |  |  |     |          |          |          |          |  |     |          |          |          |          |          |     |          |          |          |          |          |      |          |          |          |          |          |     |          |          |          |          |          |     |          |          |          |          |          |      |          |          |          |          |          |  |   |   |   |   |    |     |          |  |  |  |  |      |          |          |  |  |  |     |          |          |          |  |  |     |          |          |          |          |  |      |          |          |          |          |          |
| 9 B                                                                                                                                          | 1.782141                                                                                                                                                                                                                                                                                                                                                                                                                                                                                                                                                                                                                                                                                                                                                                                                                                                                                                                                                                                                                                                                                                                                                                                                                                                                                                                                                                                                                                                                                                                                                                                                                                                                                                                        | 1.683541 | 1.776377 | 0.000000 |          |   |   |     |          |  |  |  |  |      |          |          |  |  |  |     |          |          |          |  |  |     |          |          |          |          |  |     |          |          |          |          |          |     |          |          |          |          |          |      |          |          |          |          |          |     |          |          |          |          |          |     |          |          |          |          |          |      |          |          |          |          |          |  |   |   |   |   |    |     |          |  |  |  |  |      |          |          |  |  |  |     |          |          |          |  |  |     |          |          |          |          |  |      |          |          |          |          |          |
| 10 B                                                                                                                                         | 2.911120                                                                                                                                                                                                                                                                                                                                                                                                                                                                                                                                                                                                                                                                                                                                                                                                                                                                                                                                                                                                                                                                                                                                                                                                                                                                                                                                                                                                                                                                                                                                                                                                                                                                                                                        | 2.892233 | 2.956784 | 3.756612 | 0.000000 |   |   |     |          |  |  |  |  |      |          |          |  |  |  |     |          |          |          |  |  |     |          |          |          |          |  |     |          |          |          |          |          |     |          |          |          |          |          |      |          |          |          |          |          |     |          |          |          |          |          |     |          |          |          |          |          |      |          |          |          |          |          |  |   |   |   |   |    |     |          |  |  |  |  |      |          |          |  |  |  |     |          |          |          |  |  |     |          |          |          |          |  |      |          |          |          |          |          |

| 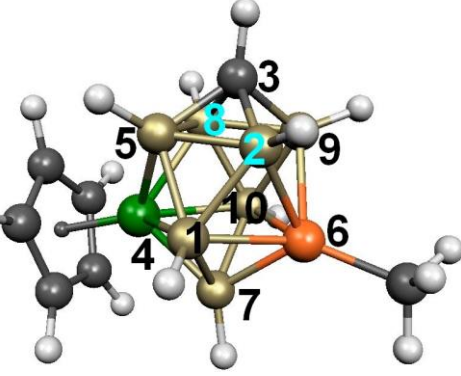 <p>5. -2055.14589270 +18.3<br/>C<sub>s</sub> H/L 2.64</p>  | <table border="1"> <thead> <tr> <th></th> <th>1</th> <th>2</th> <th>3</th> <th>4</th> <th>5</th> </tr> </thead> <tbody> <tr><td>1 B</td><td>0.000000</td><td></td><td></td><td></td><td></td></tr> <tr><td>2 B</td><td>1.857306</td><td>0.000000</td><td></td><td></td><td></td></tr> <tr><td>3 C</td><td>2.802593</td><td>1.577864</td><td>0.000000</td><td></td><td></td></tr> <tr><td>4 Fe</td><td>2.089465</td><td>3.207995</td><td>3.106176</td><td>0.000000</td><td></td></tr> <tr><td>5 B</td><td>1.789635</td><td>1.806238</td><td>1.623435</td><td>2.042451</td><td>0.000000</td></tr> <tr><td>6 P</td><td>2.023474</td><td>1.995030</td><td>2.902587</td><td>3.067956</td><td>2.989389</td></tr> <tr><td>7 B</td><td>1.845510</td><td>3.112520</td><td>3.692740</td><td>1.900545</td><td>3.022195</td></tr> <tr><td>8 B</td><td>2.864325</td><td>2.620129</td><td>1.623692</td><td>2.042451</td><td>1.835100</td></tr> <tr><td>9 B</td><td>2.966592</td><td>1.963100</td><td>1.577804</td><td>3.208022</td><td>2.619964</td></tr> <tr><td>10 B</td><td>2.726000</td><td>2.966773</td><td>2.802963</td><td>2.089981</td><td>2.864744</td></tr> <tr> <th></th> <th>6</th> <th>7</th> <th>8</th> <th>9</th> <th>10</th> </tr> <tr><td>6 P</td><td>0.000000</td><td></td><td></td><td></td><td></td></tr> <tr><td>7 B</td><td>1.886672</td><td>0.000000</td><td></td><td></td><td></td></tr> <tr><td>8 B</td><td>2.989287</td><td>3.021986</td><td>0.000000</td><td></td><td></td></tr> <tr><td>9 B</td><td>1.995194</td><td>3.112553</td><td>1.806051</td><td>0.000000</td><td></td></tr> <tr><td>10 B</td><td>2.023416</td><td>1.845440</td><td>1.789792</td><td>1.857418</td><td>0.000000</td></tr> </tbody> </table> |          | 1        | 2        | 3        | 4 | 5 | 1 B | 0.000000 |  |  |  |  | 2 B  | 1.857306 | 0.000000 |  |  |  | 3 C | 2.802593 | 1.577864 | 0.000000 |  |  | 4 Fe | 2.089465 | 3.207995 | 3.106176 | 0.000000 |  | 5 B | 1.789635 | 1.806238 | 1.623435 | 2.042451 | 0.000000 | 6 P | 2.023474 | 1.995030 | 2.902587 | 3.067956 | 2.989389 | 7 B | 1.845510 | 3.112520 | 3.692740 | 1.900545 | 3.022195 | 8 B | 2.864325 | 2.620129 | 1.623692 | 2.042451 | 1.835100 | 9 B | 2.966592 | 1.963100 | 1.577804 | 3.208022 | 2.619964 | 10 B | 2.726000 | 2.966773 | 2.802963 | 2.089981 | 2.864744 |  | 6 | 7 | 8 | 9 | 10 | 6 P | 0.000000 |  |  |  |  | 7 B | 1.886672 | 0.000000 |  |  |  | 8 B | 2.989287 | 3.021986 | 0.000000 |  |  | 9 B | 1.995194 | 3.112553 | 1.806051 | 0.000000 |  | 10 B | 2.023416 | 1.845440 | 1.789792 | 1.857418 | 0.000000 |
|----------------------------------------------------------------------------------------------------------------------------------------------|--------------------------------------------------------------------------------------------------------------------------------------------------------------------------------------------------------------------------------------------------------------------------------------------------------------------------------------------------------------------------------------------------------------------------------------------------------------------------------------------------------------------------------------------------------------------------------------------------------------------------------------------------------------------------------------------------------------------------------------------------------------------------------------------------------------------------------------------------------------------------------------------------------------------------------------------------------------------------------------------------------------------------------------------------------------------------------------------------------------------------------------------------------------------------------------------------------------------------------------------------------------------------------------------------------------------------------------------------------------------------------------------------------------------------------------------------------------------------------------------------------------------------------------------------------------------------------------------------------------------------------------------------------------------------------------------------------------------------------|----------|----------|----------|----------|---|---|-----|----------|--|--|--|--|------|----------|----------|--|--|--|-----|----------|----------|----------|--|--|------|----------|----------|----------|----------|--|-----|----------|----------|----------|----------|----------|-----|----------|----------|----------|----------|----------|-----|----------|----------|----------|----------|----------|-----|----------|----------|----------|----------|----------|-----|----------|----------|----------|----------|----------|------|----------|----------|----------|----------|----------|--|---|---|---|---|----|-----|----------|--|--|--|--|-----|----------|----------|--|--|--|-----|----------|----------|----------|--|--|-----|----------|----------|----------|----------|--|------|----------|----------|----------|----------|----------|
|                                                                                                                                              | 1                                                                                                                                                                                                                                                                                                                                                                                                                                                                                                                                                                                                                                                                                                                                                                                                                                                                                                                                                                                                                                                                                                                                                                                                                                                                                                                                                                                                                                                                                                                                                                                                                                                                                                                              | 2        | 3        | 4        | 5        |   |   |     |          |  |  |  |  |      |          |          |  |  |  |     |          |          |          |  |  |      |          |          |          |          |  |     |          |          |          |          |          |     |          |          |          |          |          |     |          |          |          |          |          |     |          |          |          |          |          |     |          |          |          |          |          |      |          |          |          |          |          |  |   |   |   |   |    |     |          |  |  |  |  |     |          |          |  |  |  |     |          |          |          |  |  |     |          |          |          |          |  |      |          |          |          |          |          |
| 1 B                                                                                                                                          | 0.000000                                                                                                                                                                                                                                                                                                                                                                                                                                                                                                                                                                                                                                                                                                                                                                                                                                                                                                                                                                                                                                                                                                                                                                                                                                                                                                                                                                                                                                                                                                                                                                                                                                                                                                                       |          |          |          |          |   |   |     |          |  |  |  |  |      |          |          |  |  |  |     |          |          |          |  |  |      |          |          |          |          |  |     |          |          |          |          |          |     |          |          |          |          |          |     |          |          |          |          |          |     |          |          |          |          |          |     |          |          |          |          |          |      |          |          |          |          |          |  |   |   |   |   |    |     |          |  |  |  |  |     |          |          |  |  |  |     |          |          |          |  |  |     |          |          |          |          |  |      |          |          |          |          |          |
| 2 B                                                                                                                                          | 1.857306                                                                                                                                                                                                                                                                                                                                                                                                                                                                                                                                                                                                                                                                                                                                                                                                                                                                                                                                                                                                                                                                                                                                                                                                                                                                                                                                                                                                                                                                                                                                                                                                                                                                                                                       | 0.000000 |          |          |          |   |   |     |          |  |  |  |  |      |          |          |  |  |  |     |          |          |          |  |  |      |          |          |          |          |  |     |          |          |          |          |          |     |          |          |          |          |          |     |          |          |          |          |          |     |          |          |          |          |          |     |          |          |          |          |          |      |          |          |          |          |          |  |   |   |   |   |    |     |          |  |  |  |  |     |          |          |  |  |  |     |          |          |          |  |  |     |          |          |          |          |  |      |          |          |          |          |          |
| 3 C                                                                                                                                          | 2.802593                                                                                                                                                                                                                                                                                                                                                                                                                                                                                                                                                                                                                                                                                                                                                                                                                                                                                                                                                                                                                                                                                                                                                                                                                                                                                                                                                                                                                                                                                                                                                                                                                                                                                                                       | 1.577864 | 0.000000 |          |          |   |   |     |          |  |  |  |  |      |          |          |  |  |  |     |          |          |          |  |  |      |          |          |          |          |  |     |          |          |          |          |          |     |          |          |          |          |          |     |          |          |          |          |          |     |          |          |          |          |          |     |          |          |          |          |          |      |          |          |          |          |          |  |   |   |   |   |    |     |          |  |  |  |  |     |          |          |  |  |  |     |          |          |          |  |  |     |          |          |          |          |  |      |          |          |          |          |          |
| 4 Fe                                                                                                                                         | 2.089465                                                                                                                                                                                                                                                                                                                                                                                                                                                                                                                                                                                                                                                                                                                                                                                                                                                                                                                                                                                                                                                                                                                                                                                                                                                                                                                                                                                                                                                                                                                                                                                                                                                                                                                       | 3.207995 | 3.106176 | 0.000000 |          |   |   |     |          |  |  |  |  |      |          |          |  |  |  |     |          |          |          |  |  |      |          |          |          |          |  |     |          |          |          |          |          |     |          |          |          |          |          |     |          |          |          |          |          |     |          |          |          |          |          |     |          |          |          |          |          |      |          |          |          |          |          |  |   |   |   |   |    |     |          |  |  |  |  |     |          |          |  |  |  |     |          |          |          |  |  |     |          |          |          |          |  |      |          |          |          |          |          |
| 5 B                                                                                                                                          | 1.789635                                                                                                                                                                                                                                                                                                                                                                                                                                                                                                                                                                                                                                                                                                                                                                                                                                                                                                                                                                                                                                                                                                                                                                                                                                                                                                                                                                                                                                                                                                                                                                                                                                                                                                                       | 1.806238 | 1.623435 | 2.042451 | 0.000000 |   |   |     |          |  |  |  |  |      |          |          |  |  |  |     |          |          |          |  |  |      |          |          |          |          |  |     |          |          |          |          |          |     |          |          |          |          |          |     |          |          |          |          |          |     |          |          |          |          |          |     |          |          |          |          |          |      |          |          |          |          |          |  |   |   |   |   |    |     |          |  |  |  |  |     |          |          |  |  |  |     |          |          |          |  |  |     |          |          |          |          |  |      |          |          |          |          |          |
| 6 P                                                                                                                                          | 2.023474                                                                                                                                                                                                                                                                                                                                                                                                                                                                                                                                                                                                                                                                                                                                                                                                                                                                                                                                                                                                                                                                                                                                                                                                                                                                                                                                                                                                                                                                                                                                                                                                                                                                                                                       | 1.995030 | 2.902587 | 3.067956 | 2.989389 |   |   |     |          |  |  |  |  |      |          |          |  |  |  |     |          |          |          |  |  |      |          |          |          |          |  |     |          |          |          |          |          |     |          |          |          |          |          |     |          |          |          |          |          |     |          |          |          |          |          |     |          |          |          |          |          |      |          |          |          |          |          |  |   |   |   |   |    |     |          |  |  |  |  |     |          |          |  |  |  |     |          |          |          |  |  |     |          |          |          |          |  |      |          |          |          |          |          |
| 7 B                                                                                                                                          | 1.845510                                                                                                                                                                                                                                                                                                                                                                                                                                                                                                                                                                                                                                                                                                                                                                                                                                                                                                                                                                                                                                                                                                                                                                                                                                                                                                                                                                                                                                                                                                                                                                                                                                                                                                                       | 3.112520 | 3.692740 | 1.900545 | 3.022195 |   |   |     |          |  |  |  |  |      |          |          |  |  |  |     |          |          |          |  |  |      |          |          |          |          |  |     |          |          |          |          |          |     |          |          |          |          |          |     |          |          |          |          |          |     |          |          |          |          |          |     |          |          |          |          |          |      |          |          |          |          |          |  |   |   |   |   |    |     |          |  |  |  |  |     |          |          |  |  |  |     |          |          |          |  |  |     |          |          |          |          |  |      |          |          |          |          |          |
| 8 B                                                                                                                                          | 2.864325                                                                                                                                                                                                                                                                                                                                                                                                                                                                                                                                                                                                                                                                                                                                                                                                                                                                                                                                                                                                                                                                                                                                                                                                                                                                                                                                                                                                                                                                                                                                                                                                                                                                                                                       | 2.620129 | 1.623692 | 2.042451 | 1.835100 |   |   |     |          |  |  |  |  |      |          |          |  |  |  |     |          |          |          |  |  |      |          |          |          |          |  |     |          |          |          |          |          |     |          |          |          |          |          |     |          |          |          |          |          |     |          |          |          |          |          |     |          |          |          |          |          |      |          |          |          |          |          |  |   |   |   |   |    |     |          |  |  |  |  |     |          |          |  |  |  |     |          |          |          |  |  |     |          |          |          |          |  |      |          |          |          |          |          |
| 9 B                                                                                                                                          | 2.966592                                                                                                                                                                                                                                                                                                                                                                                                                                                                                                                                                                                                                                                                                                                                                                                                                                                                                                                                                                                                                                                                                                                                                                                                                                                                                                                                                                                                                                                                                                                                                                                                                                                                                                                       | 1.963100 | 1.577804 | 3.208022 | 2.619964 |   |   |     |          |  |  |  |  |      |          |          |  |  |  |     |          |          |          |  |  |      |          |          |          |          |  |     |          |          |          |          |          |     |          |          |          |          |          |     |          |          |          |          |          |     |          |          |          |          |          |     |          |          |          |          |          |      |          |          |          |          |          |  |   |   |   |   |    |     |          |  |  |  |  |     |          |          |  |  |  |     |          |          |          |  |  |     |          |          |          |          |  |      |          |          |          |          |          |
| 10 B                                                                                                                                         | 2.726000                                                                                                                                                                                                                                                                                                                                                                                                                                                                                                                                                                                                                                                                                                                                                                                                                                                                                                                                                                                                                                                                                                                                                                                                                                                                                                                                                                                                                                                                                                                                                                                                                                                                                                                       | 2.966773 | 2.802963 | 2.089981 | 2.864744 |   |   |     |          |  |  |  |  |      |          |          |  |  |  |     |          |          |          |  |  |      |          |          |          |          |  |     |          |          |          |          |          |     |          |          |          |          |          |     |          |          |          |          |          |     |          |          |          |          |          |     |          |          |          |          |          |      |          |          |          |          |          |  |   |   |   |   |    |     |          |  |  |  |  |     |          |          |  |  |  |     |          |          |          |  |  |     |          |          |          |          |  |      |          |          |          |          |          |
|                                                                                                                                              | 6                                                                                                                                                                                                                                                                                                                                                                                                                                                                                                                                                                                                                                                                                                                                                                                                                                                                                                                                                                                                                                                                                                                                                                                                                                                                                                                                                                                                                                                                                                                                                                                                                                                                                                                              | 7        | 8        | 9        | 10       |   |   |     |          |  |  |  |  |      |          |          |  |  |  |     |          |          |          |  |  |      |          |          |          |          |  |     |          |          |          |          |          |     |          |          |          |          |          |     |          |          |          |          |          |     |          |          |          |          |          |     |          |          |          |          |          |      |          |          |          |          |          |  |   |   |   |   |    |     |          |  |  |  |  |     |          |          |  |  |  |     |          |          |          |  |  |     |          |          |          |          |  |      |          |          |          |          |          |
| 6 P                                                                                                                                          | 0.000000                                                                                                                                                                                                                                                                                                                                                                                                                                                                                                                                                                                                                                                                                                                                                                                                                                                                                                                                                                                                                                                                                                                                                                                                                                                                                                                                                                                                                                                                                                                                                                                                                                                                                                                       |          |          |          |          |   |   |     |          |  |  |  |  |      |          |          |  |  |  |     |          |          |          |  |  |      |          |          |          |          |  |     |          |          |          |          |          |     |          |          |          |          |          |     |          |          |          |          |          |     |          |          |          |          |          |     |          |          |          |          |          |      |          |          |          |          |          |  |   |   |   |   |    |     |          |  |  |  |  |     |          |          |  |  |  |     |          |          |          |  |  |     |          |          |          |          |  |      |          |          |          |          |          |
| 7 B                                                                                                                                          | 1.886672                                                                                                                                                                                                                                                                                                                                                                                                                                                                                                                                                                                                                                                                                                                                                                                                                                                                                                                                                                                                                                                                                                                                                                                                                                                                                                                                                                                                                                                                                                                                                                                                                                                                                                                       | 0.000000 |          |          |          |   |   |     |          |  |  |  |  |      |          |          |  |  |  |     |          |          |          |  |  |      |          |          |          |          |  |     |          |          |          |          |          |     |          |          |          |          |          |     |          |          |          |          |          |     |          |          |          |          |          |     |          |          |          |          |          |      |          |          |          |          |          |  |   |   |   |   |    |     |          |  |  |  |  |     |          |          |  |  |  |     |          |          |          |  |  |     |          |          |          |          |  |      |          |          |          |          |          |
| 8 B                                                                                                                                          | 2.989287                                                                                                                                                                                                                                                                                                                                                                                                                                                                                                                                                                                                                                                                                                                                                                                                                                                                                                                                                                                                                                                                                                                                                                                                                                                                                                                                                                                                                                                                                                                                                                                                                                                                                                                       | 3.021986 | 0.000000 |          |          |   |   |     |          |  |  |  |  |      |          |          |  |  |  |     |          |          |          |  |  |      |          |          |          |          |  |     |          |          |          |          |          |     |          |          |          |          |          |     |          |          |          |          |          |     |          |          |          |          |          |     |          |          |          |          |          |      |          |          |          |          |          |  |   |   |   |   |    |     |          |  |  |  |  |     |          |          |  |  |  |     |          |          |          |  |  |     |          |          |          |          |  |      |          |          |          |          |          |
| 9 B                                                                                                                                          | 1.995194                                                                                                                                                                                                                                                                                                                                                                                                                                                                                                                                                                                                                                                                                                                                                                                                                                                                                                                                                                                                                                                                                                                                                                                                                                                                                                                                                                                                                                                                                                                                                                                                                                                                                                                       | 3.112553 | 1.806051 | 0.000000 |          |   |   |     |          |  |  |  |  |      |          |          |  |  |  |     |          |          |          |  |  |      |          |          |          |          |  |     |          |          |          |          |          |     |          |          |          |          |          |     |          |          |          |          |          |     |          |          |          |          |          |     |          |          |          |          |          |      |          |          |          |          |          |  |   |   |   |   |    |     |          |  |  |  |  |     |          |          |  |  |  |     |          |          |          |  |  |     |          |          |          |          |  |      |          |          |          |          |          |
| 10 B                                                                                                                                         | 2.023416                                                                                                                                                                                                                                                                                                                                                                                                                                                                                                                                                                                                                                                                                                                                                                                                                                                                                                                                                                                                                                                                                                                                                                                                                                                                                                                                                                                                                                                                                                                                                                                                                                                                                                                       | 1.845440 | 1.789792 | 1.857418 | 0.000000 |   |   |     |          |  |  |  |  |      |          |          |  |  |  |     |          |          |          |  |  |      |          |          |          |          |  |     |          |          |          |          |          |     |          |          |          |          |          |     |          |          |          |          |          |     |          |          |          |          |          |     |          |          |          |          |          |      |          |          |          |          |          |  |   |   |   |   |    |     |          |  |  |  |  |     |          |          |  |  |  |     |          |          |          |  |  |     |          |          |          |          |  |      |          |          |          |          |          |
|  <p>6. -2055.14560420 +18.5<br/>C<sub>s</sub> H/L 2.64</p> | <table border="1"> <thead> <tr> <th></th> <th>1</th> <th>2</th> <th>3</th> <th>4</th> <th>5</th> </tr> </thead> <tbody> <tr><td>1 B</td><td>0.000000</td><td></td><td></td><td></td><td></td></tr> <tr><td>2 Fe</td><td>2.134269</td><td>0.000000</td><td></td><td></td><td></td></tr> <tr><td>3 P</td><td>3.090674</td><td>3.251280</td><td>0.000000</td><td></td><td></td></tr> <tr><td>4 B</td><td>1.829314</td><td>2.963923</td><td>3.113442</td><td>0.000000</td><td></td></tr> <tr><td>5 B</td><td>2.832681</td><td>3.159444</td><td>1.928834</td><td>1.761749</td><td>0.000000</td></tr> <tr><td>6 B</td><td>2.617400</td><td>2.134179</td><td>3.090542</td><td>1.829326</td><td>1.775077</td></tr> <tr><td>7 B</td><td>1.770240</td><td>2.004689</td><td>1.952551</td><td>2.911036</td><td>2.805325</td></tr> <tr><td>8 B</td><td>3.000991</td><td>2.004636</td><td>1.952425</td><td>2.911125</td><td>1.921815</td></tr> <tr><td>9 B</td><td>1.775159</td><td>3.159503</td><td>1.928922</td><td>1.761681</td><td>1.861700</td></tr> <tr><td>10 C</td><td>1.604042</td><td>1.884483</td><td>3.726151</td><td>1.601091</td><td>2.736481</td></tr> <tr> <th></th> <th>6</th> <th>7</th> <th>8</th> <th>9</th> <th>10</th> </tr> <tr><td>6 B</td><td>0.000000</td><td></td><td></td><td></td><td></td></tr> <tr><td>7 B</td><td>3.000909</td><td>0.000000</td><td></td><td></td><td></td></tr> <tr><td>8 B</td><td>1.770282</td><td>2.243400</td><td>0.000000</td><td></td><td></td></tr> <tr><td>9 B</td><td>2.832603</td><td>1.921813</td><td>2.805346</td><td>0.000000</td><td></td></tr> <tr><td>10 C</td><td>1.604111</td><td>2.808291</td><td>2.808387</td><td>2.736449</td><td>0.000000</td></tr> </tbody> </table> |          | 1        | 2        | 3        | 4 | 5 | 1 B | 0.000000 |  |  |  |  | 2 Fe | 2.134269 | 0.000000 |  |  |  | 3 P | 3.090674 | 3.251280 | 0.000000 |  |  | 4 B  | 1.829314 | 2.963923 | 3.113442 | 0.000000 |  | 5 B | 2.832681 | 3.159444 | 1.928834 | 1.761749 | 0.000000 | 6 B | 2.617400 | 2.134179 | 3.090542 | 1.829326 | 1.775077 | 7 B | 1.770240 | 2.004689 | 1.952551 | 2.911036 | 2.805325 | 8 B | 3.000991 | 2.004636 | 1.952425 | 2.911125 | 1.921815 | 9 B | 1.775159 | 3.159503 | 1.928922 | 1.761681 | 1.861700 | 10 C | 1.604042 | 1.884483 | 3.726151 | 1.601091 | 2.736481 |  | 6 | 7 | 8 | 9 | 10 | 6 B | 0.000000 |  |  |  |  | 7 B | 3.000909 | 0.000000 |  |  |  | 8 B | 1.770282 | 2.243400 | 0.000000 |  |  | 9 B | 2.832603 | 1.921813 | 2.805346 | 0.000000 |  | 10 C | 1.604111 | 2.808291 | 2.808387 | 2.736449 | 0.000000 |
|                                                                                                                                              | 1                                                                                                                                                                                                                                                                                                                                                                                                                                                                                                                                                                                                                                                                                                                                                                                                                                                                                                                                                                                                                                                                                                                                                                                                                                                                                                                                                                                                                                                                                                                                                                                                                                                                                                                              | 2        | 3        | 4        | 5        |   |   |     |          |  |  |  |  |      |          |          |  |  |  |     |          |          |          |  |  |      |          |          |          |          |  |     |          |          |          |          |          |     |          |          |          |          |          |     |          |          |          |          |          |     |          |          |          |          |          |     |          |          |          |          |          |      |          |          |          |          |          |  |   |   |   |   |    |     |          |  |  |  |  |     |          |          |  |  |  |     |          |          |          |  |  |     |          |          |          |          |  |      |          |          |          |          |          |
| 1 B                                                                                                                                          | 0.000000                                                                                                                                                                                                                                                                                                                                                                                                                                                                                                                                                                                                                                                                                                                                                                                                                                                                                                                                                                                                                                                                                                                                                                                                                                                                                                                                                                                                                                                                                                                                                                                                                                                                                                                       |          |          |          |          |   |   |     |          |  |  |  |  |      |          |          |  |  |  |     |          |          |          |  |  |      |          |          |          |          |  |     |          |          |          |          |          |     |          |          |          |          |          |     |          |          |          |          |          |     |          |          |          |          |          |     |          |          |          |          |          |      |          |          |          |          |          |  |   |   |   |   |    |     |          |  |  |  |  |     |          |          |  |  |  |     |          |          |          |  |  |     |          |          |          |          |  |      |          |          |          |          |          |
| 2 Fe                                                                                                                                         | 2.134269                                                                                                                                                                                                                                                                                                                                                                                                                                                                                                                                                                                                                                                                                                                                                                                                                                                                                                                                                                                                                                                                                                                                                                                                                                                                                                                                                                                                                                                                                                                                                                                                                                                                                                                       | 0.000000 |          |          |          |   |   |     |          |  |  |  |  |      |          |          |  |  |  |     |          |          |          |  |  |      |          |          |          |          |  |     |          |          |          |          |          |     |          |          |          |          |          |     |          |          |          |          |          |     |          |          |          |          |          |     |          |          |          |          |          |      |          |          |          |          |          |  |   |   |   |   |    |     |          |  |  |  |  |     |          |          |  |  |  |     |          |          |          |  |  |     |          |          |          |          |  |      |          |          |          |          |          |
| 3 P                                                                                                                                          | 3.090674                                                                                                                                                                                                                                                                                                                                                                                                                                                                                                                                                                                                                                                                                                                                                                                                                                                                                                                                                                                                                                                                                                                                                                                                                                                                                                                                                                                                                                                                                                                                                                                                                                                                                                                       | 3.251280 | 0.000000 |          |          |   |   |     |          |  |  |  |  |      |          |          |  |  |  |     |          |          |          |  |  |      |          |          |          |          |  |     |          |          |          |          |          |     |          |          |          |          |          |     |          |          |          |          |          |     |          |          |          |          |          |     |          |          |          |          |          |      |          |          |          |          |          |  |   |   |   |   |    |     |          |  |  |  |  |     |          |          |  |  |  |     |          |          |          |  |  |     |          |          |          |          |  |      |          |          |          |          |          |
| 4 B                                                                                                                                          | 1.829314                                                                                                                                                                                                                                                                                                                                                                                                                                                                                                                                                                                                                                                                                                                                                                                                                                                                                                                                                                                                                                                                                                                                                                                                                                                                                                                                                                                                                                                                                                                                                                                                                                                                                                                       | 2.963923 | 3.113442 | 0.000000 |          |   |   |     |          |  |  |  |  |      |          |          |  |  |  |     |          |          |          |  |  |      |          |          |          |          |  |     |          |          |          |          |          |     |          |          |          |          |          |     |          |          |          |          |          |     |          |          |          |          |          |     |          |          |          |          |          |      |          |          |          |          |          |  |   |   |   |   |    |     |          |  |  |  |  |     |          |          |  |  |  |     |          |          |          |  |  |     |          |          |          |          |  |      |          |          |          |          |          |
| 5 B                                                                                                                                          | 2.832681                                                                                                                                                                                                                                                                                                                                                                                                                                                                                                                                                                                                                                                                                                                                                                                                                                                                                                                                                                                                                                                                                                                                                                                                                                                                                                                                                                                                                                                                                                                                                                                                                                                                                                                       | 3.159444 | 1.928834 | 1.761749 | 0.000000 |   |   |     |          |  |  |  |  |      |          |          |  |  |  |     |          |          |          |  |  |      |          |          |          |          |  |     |          |          |          |          |          |     |          |          |          |          |          |     |          |          |          |          |          |     |          |          |          |          |          |     |          |          |          |          |          |      |          |          |          |          |          |  |   |   |   |   |    |     |          |  |  |  |  |     |          |          |  |  |  |     |          |          |          |  |  |     |          |          |          |          |  |      |          |          |          |          |          |
| 6 B                                                                                                                                          | 2.617400                                                                                                                                                                                                                                                                                                                                                                                                                                                                                                                                                                                                                                                                                                                                                                                                                                                                                                                                                                                                                                                                                                                                                                                                                                                                                                                                                                                                                                                                                                                                                                                                                                                                                                                       | 2.134179 | 3.090542 | 1.829326 | 1.775077 |   |   |     |          |  |  |  |  |      |          |          |  |  |  |     |          |          |          |  |  |      |          |          |          |          |  |     |          |          |          |          |          |     |          |          |          |          |          |     |          |          |          |          |          |     |          |          |          |          |          |     |          |          |          |          |          |      |          |          |          |          |          |  |   |   |   |   |    |     |          |  |  |  |  |     |          |          |  |  |  |     |          |          |          |  |  |     |          |          |          |          |  |      |          |          |          |          |          |
| 7 B                                                                                                                                          | 1.770240                                                                                                                                                                                                                                                                                                                                                                                                                                                                                                                                                                                                                                                                                                                                                                                                                                                                                                                                                                                                                                                                                                                                                                                                                                                                                                                                                                                                                                                                                                                                                                                                                                                                                                                       | 2.004689 | 1.952551 | 2.911036 | 2.805325 |   |   |     |          |  |  |  |  |      |          |          |  |  |  |     |          |          |          |  |  |      |          |          |          |          |  |     |          |          |          |          |          |     |          |          |          |          |          |     |          |          |          |          |          |     |          |          |          |          |          |     |          |          |          |          |          |      |          |          |          |          |          |  |   |   |   |   |    |     |          |  |  |  |  |     |          |          |  |  |  |     |          |          |          |  |  |     |          |          |          |          |  |      |          |          |          |          |          |
| 8 B                                                                                                                                          | 3.000991                                                                                                                                                                                                                                                                                                                                                                                                                                                                                                                                                                                                                                                                                                                                                                                                                                                                                                                                                                                                                                                                                                                                                                                                                                                                                                                                                                                                                                                                                                                                                                                                                                                                                                                       | 2.004636 | 1.952425 | 2.911125 | 1.921815 |   |   |     |          |  |  |  |  |      |          |          |  |  |  |     |          |          |          |  |  |      |          |          |          |          |  |     |          |          |          |          |          |     |          |          |          |          |          |     |          |          |          |          |          |     |          |          |          |          |          |     |          |          |          |          |          |      |          |          |          |          |          |  |   |   |   |   |    |     |          |  |  |  |  |     |          |          |  |  |  |     |          |          |          |  |  |     |          |          |          |          |  |      |          |          |          |          |          |
| 9 B                                                                                                                                          | 1.775159                                                                                                                                                                                                                                                                                                                                                                                                                                                                                                                                                                                                                                                                                                                                                                                                                                                                                                                                                                                                                                                                                                                                                                                                                                                                                                                                                                                                                                                                                                                                                                                                                                                                                                                       | 3.159503 | 1.928922 | 1.761681 | 1.861700 |   |   |     |          |  |  |  |  |      |          |          |  |  |  |     |          |          |          |  |  |      |          |          |          |          |  |     |          |          |          |          |          |     |          |          |          |          |          |     |          |          |          |          |          |     |          |          |          |          |          |     |          |          |          |          |          |      |          |          |          |          |          |  |   |   |   |   |    |     |          |  |  |  |  |     |          |          |  |  |  |     |          |          |          |  |  |     |          |          |          |          |  |      |          |          |          |          |          |
| 10 C                                                                                                                                         | 1.604042                                                                                                                                                                                                                                                                                                                                                                                                                                                                                                                                                                                                                                                                                                                                                                                                                                                                                                                                                                                                                                                                                                                                                                                                                                                                                                                                                                                                                                                                                                                                                                                                                                                                                                                       | 1.884483 | 3.726151 | 1.601091 | 2.736481 |   |   |     |          |  |  |  |  |      |          |          |  |  |  |     |          |          |          |  |  |      |          |          |          |          |  |     |          |          |          |          |          |     |          |          |          |          |          |     |          |          |          |          |          |     |          |          |          |          |          |     |          |          |          |          |          |      |          |          |          |          |          |  |   |   |   |   |    |     |          |  |  |  |  |     |          |          |  |  |  |     |          |          |          |  |  |     |          |          |          |          |  |      |          |          |          |          |          |
|                                                                                                                                              | 6                                                                                                                                                                                                                                                                                                                                                                                                                                                                                                                                                                                                                                                                                                                                                                                                                                                                                                                                                                                                                                                                                                                                                                                                                                                                                                                                                                                                                                                                                                                                                                                                                                                                                                                              | 7        | 8        | 9        | 10       |   |   |     |          |  |  |  |  |      |          |          |  |  |  |     |          |          |          |  |  |      |          |          |          |          |  |     |          |          |          |          |          |     |          |          |          |          |          |     |          |          |          |          |          |     |          |          |          |          |          |     |          |          |          |          |          |      |          |          |          |          |          |  |   |   |   |   |    |     |          |  |  |  |  |     |          |          |  |  |  |     |          |          |          |  |  |     |          |          |          |          |  |      |          |          |          |          |          |
| 6 B                                                                                                                                          | 0.000000                                                                                                                                                                                                                                                                                                                                                                                                                                                                                                                                                                                                                                                                                                                                                                                                                                                                                                                                                                                                                                                                                                                                                                                                                                                                                                                                                                                                                                                                                                                                                                                                                                                                                                                       |          |          |          |          |   |   |     |          |  |  |  |  |      |          |          |  |  |  |     |          |          |          |  |  |      |          |          |          |          |  |     |          |          |          |          |          |     |          |          |          |          |          |     |          |          |          |          |          |     |          |          |          |          |          |     |          |          |          |          |          |      |          |          |          |          |          |  |   |   |   |   |    |     |          |  |  |  |  |     |          |          |  |  |  |     |          |          |          |  |  |     |          |          |          |          |  |      |          |          |          |          |          |
| 7 B                                                                                                                                          | 3.000909                                                                                                                                                                                                                                                                                                                                                                                                                                                                                                                                                                                                                                                                                                                                                                                                                                                                                                                                                                                                                                                                                                                                                                                                                                                                                                                                                                                                                                                                                                                                                                                                                                                                                                                       | 0.000000 |          |          |          |   |   |     |          |  |  |  |  |      |          |          |  |  |  |     |          |          |          |  |  |      |          |          |          |          |  |     |          |          |          |          |          |     |          |          |          |          |          |     |          |          |          |          |          |     |          |          |          |          |          |     |          |          |          |          |          |      |          |          |          |          |          |  |   |   |   |   |    |     |          |  |  |  |  |     |          |          |  |  |  |     |          |          |          |  |  |     |          |          |          |          |  |      |          |          |          |          |          |
| 8 B                                                                                                                                          | 1.770282                                                                                                                                                                                                                                                                                                                                                                                                                                                                                                                                                                                                                                                                                                                                                                                                                                                                                                                                                                                                                                                                                                                                                                                                                                                                                                                                                                                                                                                                                                                                                                                                                                                                                                                       | 2.243400 | 0.000000 |          |          |   |   |     |          |  |  |  |  |      |          |          |  |  |  |     |          |          |          |  |  |      |          |          |          |          |  |     |          |          |          |          |          |     |          |          |          |          |          |     |          |          |          |          |          |     |          |          |          |          |          |     |          |          |          |          |          |      |          |          |          |          |          |  |   |   |   |   |    |     |          |  |  |  |  |     |          |          |  |  |  |     |          |          |          |  |  |     |          |          |          |          |  |      |          |          |          |          |          |
| 9 B                                                                                                                                          | 2.832603                                                                                                                                                                                                                                                                                                                                                                                                                                                                                                                                                                                                                                                                                                                                                                                                                                                                                                                                                                                                                                                                                                                                                                                                                                                                                                                                                                                                                                                                                                                                                                                                                                                                                                                       | 1.921813 | 2.805346 | 0.000000 |          |   |   |     |          |  |  |  |  |      |          |          |  |  |  |     |          |          |          |  |  |      |          |          |          |          |  |     |          |          |          |          |          |     |          |          |          |          |          |     |          |          |          |          |          |     |          |          |          |          |          |     |          |          |          |          |          |      |          |          |          |          |          |  |   |   |   |   |    |     |          |  |  |  |  |     |          |          |  |  |  |     |          |          |          |  |  |     |          |          |          |          |  |      |          |          |          |          |          |
| 10 C                                                                                                                                         | 1.604111                                                                                                                                                                                                                                                                                                                                                                                                                                                                                                                                                                                                                                                                                                                                                                                                                                                                                                                                                                                                                                                                                                                                                                                                                                                                                                                                                                                                                                                                                                                                                                                                                                                                                                                       | 2.808291 | 2.808387 | 2.736449 | 0.000000 |   |   |     |          |  |  |  |  |      |          |          |  |  |  |     |          |          |          |  |  |      |          |          |          |          |  |     |          |          |          |          |          |     |          |          |          |          |          |     |          |          |          |          |          |     |          |          |          |          |          |     |          |          |          |          |          |      |          |          |          |          |          |  |   |   |   |   |    |     |          |  |  |  |  |     |          |          |  |  |  |     |          |          |          |  |  |     |          |          |          |          |  |      |          |          |          |          |          |

| 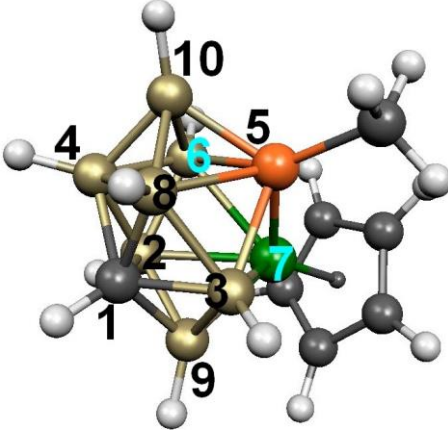 <p>7. -2055.14540260 +18.6<br/>C<sub>1</sub> H/L 2.82</p>  | <table border="1"> <thead> <tr> <th></th> <th>1</th> <th>2</th> <th>3</th> <th>4</th> <th>5</th> </tr> </thead> <tbody> <tr><td>1 C</td><td>0.000000</td><td></td><td></td><td></td><td></td></tr> <tr><td>2 B</td><td>1.733592</td><td>0.000000</td><td></td><td></td><td></td></tr> <tr><td>3 B</td><td>1.699419</td><td>2.600469</td><td>0.000000</td><td></td><td></td></tr> <tr><td>4 B</td><td>1.707828</td><td>1.775097</td><td>2.831367</td><td>0.000000</td><td></td></tr> <tr><td>5 P</td><td>2.840904</td><td>2.975924</td><td>1.980124</td><td>2.747192</td><td>0.000000</td></tr> <tr><td>6 B</td><td>2.697415</td><td>1.736650</td><td>2.997260</td><td>1.774778</td><td>2.112208</td></tr> <tr><td>7 Fe</td><td>2.846195</td><td>2.141667</td><td>2.179205</td><td>3.216527</td><td>2.108920</td></tr> <tr><td>8 B</td><td>1.680812</td><td>2.809483</td><td>1.852332</td><td>1.794531</td><td>2.034294</td></tr> <tr><td>9 B</td><td>1.647085</td><td>1.714302</td><td>1.705230</td><td>2.908283</td><td>3.077668</td></tr> <tr><td>10 B</td><td>2.806026</td><td>2.921840</td><td>3.020696</td><td>1.686925</td><td>1.870218</td></tr> <tr> <th></th> <th>6</th> <th>7</th> <th>8</th> <th>9</th> <th>10</th> </tr> <tr><td>6 B</td><td>0.000000</td><td></td><td></td><td></td><td></td></tr> <tr><td>7 Fe</td><td>2.166956</td><td>0.000000</td><td></td><td></td><td></td></tr> <tr><td>8 B</td><td>2.693524</td><td>3.267162</td><td>0.000000</td><td></td><td></td></tr> <tr><td>9 B</td><td>2.977406</td><td>1.959589</td><td>2.937249</td><td>0.000000</td><td></td></tr> <tr><td>10 B</td><td>1.795290</td><td>3.314006</td><td>1.749125</td><td>3.781866</td><td>0.000000</td></tr> </tbody> </table> |          | 1        | 2        | 3        | 4 | 5 | 1 C | 0.000000 |  |  |  |  | 2 B  | 1.733592 | 0.000000 |  |  |  | 3 B | 1.699419 | 2.600469 | 0.000000 |  |  | 4 B | 1.707828 | 1.775097 | 2.831367 | 0.000000 |  | 5 P | 2.840904 | 2.975924 | 1.980124 | 2.747192 | 0.000000 | 6 B | 2.697415 | 1.736650 | 2.997260 | 1.774778 | 2.112208 | 7 Fe | 2.846195 | 2.141667 | 2.179205 | 3.216527 | 2.108920 | 8 B | 1.680812 | 2.809483 | 1.852332 | 1.794531 | 2.034294 | 9 B | 1.647085 | 1.714302 | 1.705230 | 2.908283 | 3.077668 | 10 B | 2.806026 | 2.921840 | 3.020696 | 1.686925 | 1.870218 |  | 6 | 7 | 8 | 9 | 10 | 6 B | 0.000000 |  |  |  |  | 7 Fe | 2.166956 | 0.000000 |  |  |  | 8 B | 2.693524 | 3.267162 | 0.000000 |  |  | 9 B | 2.977406 | 1.959589 | 2.937249 | 0.000000 |  | 10 B | 1.795290 | 3.314006 | 1.749125 | 3.781866 | 0.000000 |
|----------------------------------------------------------------------------------------------------------------------------------------------|---------------------------------------------------------------------------------------------------------------------------------------------------------------------------------------------------------------------------------------------------------------------------------------------------------------------------------------------------------------------------------------------------------------------------------------------------------------------------------------------------------------------------------------------------------------------------------------------------------------------------------------------------------------------------------------------------------------------------------------------------------------------------------------------------------------------------------------------------------------------------------------------------------------------------------------------------------------------------------------------------------------------------------------------------------------------------------------------------------------------------------------------------------------------------------------------------------------------------------------------------------------------------------------------------------------------------------------------------------------------------------------------------------------------------------------------------------------------------------------------------------------------------------------------------------------------------------------------------------------------------------------------------------------------------------------------------------------------------------|----------|----------|----------|----------|---|---|-----|----------|--|--|--|--|------|----------|----------|--|--|--|-----|----------|----------|----------|--|--|-----|----------|----------|----------|----------|--|-----|----------|----------|----------|----------|----------|-----|----------|----------|----------|----------|----------|------|----------|----------|----------|----------|----------|-----|----------|----------|----------|----------|----------|-----|----------|----------|----------|----------|----------|------|----------|----------|----------|----------|----------|--|---|---|---|---|----|-----|----------|--|--|--|--|------|----------|----------|--|--|--|-----|----------|----------|----------|--|--|-----|----------|----------|----------|----------|--|------|----------|----------|----------|----------|----------|
|                                                                                                                                              | 1                                                                                                                                                                                                                                                                                                                                                                                                                                                                                                                                                                                                                                                                                                                                                                                                                                                                                                                                                                                                                                                                                                                                                                                                                                                                                                                                                                                                                                                                                                                                                                                                                                                                                                                               | 2        | 3        | 4        | 5        |   |   |     |          |  |  |  |  |      |          |          |  |  |  |     |          |          |          |  |  |     |          |          |          |          |  |     |          |          |          |          |          |     |          |          |          |          |          |      |          |          |          |          |          |     |          |          |          |          |          |     |          |          |          |          |          |      |          |          |          |          |          |  |   |   |   |   |    |     |          |  |  |  |  |      |          |          |  |  |  |     |          |          |          |  |  |     |          |          |          |          |  |      |          |          |          |          |          |
| 1 C                                                                                                                                          | 0.000000                                                                                                                                                                                                                                                                                                                                                                                                                                                                                                                                                                                                                                                                                                                                                                                                                                                                                                                                                                                                                                                                                                                                                                                                                                                                                                                                                                                                                                                                                                                                                                                                                                                                                                                        |          |          |          |          |   |   |     |          |  |  |  |  |      |          |          |  |  |  |     |          |          |          |  |  |     |          |          |          |          |  |     |          |          |          |          |          |     |          |          |          |          |          |      |          |          |          |          |          |     |          |          |          |          |          |     |          |          |          |          |          |      |          |          |          |          |          |  |   |   |   |   |    |     |          |  |  |  |  |      |          |          |  |  |  |     |          |          |          |  |  |     |          |          |          |          |  |      |          |          |          |          |          |
| 2 B                                                                                                                                          | 1.733592                                                                                                                                                                                                                                                                                                                                                                                                                                                                                                                                                                                                                                                                                                                                                                                                                                                                                                                                                                                                                                                                                                                                                                                                                                                                                                                                                                                                                                                                                                                                                                                                                                                                                                                        | 0.000000 |          |          |          |   |   |     |          |  |  |  |  |      |          |          |  |  |  |     |          |          |          |  |  |     |          |          |          |          |  |     |          |          |          |          |          |     |          |          |          |          |          |      |          |          |          |          |          |     |          |          |          |          |          |     |          |          |          |          |          |      |          |          |          |          |          |  |   |   |   |   |    |     |          |  |  |  |  |      |          |          |  |  |  |     |          |          |          |  |  |     |          |          |          |          |  |      |          |          |          |          |          |
| 3 B                                                                                                                                          | 1.699419                                                                                                                                                                                                                                                                                                                                                                                                                                                                                                                                                                                                                                                                                                                                                                                                                                                                                                                                                                                                                                                                                                                                                                                                                                                                                                                                                                                                                                                                                                                                                                                                                                                                                                                        | 2.600469 | 0.000000 |          |          |   |   |     |          |  |  |  |  |      |          |          |  |  |  |     |          |          |          |  |  |     |          |          |          |          |  |     |          |          |          |          |          |     |          |          |          |          |          |      |          |          |          |          |          |     |          |          |          |          |          |     |          |          |          |          |          |      |          |          |          |          |          |  |   |   |   |   |    |     |          |  |  |  |  |      |          |          |  |  |  |     |          |          |          |  |  |     |          |          |          |          |  |      |          |          |          |          |          |
| 4 B                                                                                                                                          | 1.707828                                                                                                                                                                                                                                                                                                                                                                                                                                                                                                                                                                                                                                                                                                                                                                                                                                                                                                                                                                                                                                                                                                                                                                                                                                                                                                                                                                                                                                                                                                                                                                                                                                                                                                                        | 1.775097 | 2.831367 | 0.000000 |          |   |   |     |          |  |  |  |  |      |          |          |  |  |  |     |          |          |          |  |  |     |          |          |          |          |  |     |          |          |          |          |          |     |          |          |          |          |          |      |          |          |          |          |          |     |          |          |          |          |          |     |          |          |          |          |          |      |          |          |          |          |          |  |   |   |   |   |    |     |          |  |  |  |  |      |          |          |  |  |  |     |          |          |          |  |  |     |          |          |          |          |  |      |          |          |          |          |          |
| 5 P                                                                                                                                          | 2.840904                                                                                                                                                                                                                                                                                                                                                                                                                                                                                                                                                                                                                                                                                                                                                                                                                                                                                                                                                                                                                                                                                                                                                                                                                                                                                                                                                                                                                                                                                                                                                                                                                                                                                                                        | 2.975924 | 1.980124 | 2.747192 | 0.000000 |   |   |     |          |  |  |  |  |      |          |          |  |  |  |     |          |          |          |  |  |     |          |          |          |          |  |     |          |          |          |          |          |     |          |          |          |          |          |      |          |          |          |          |          |     |          |          |          |          |          |     |          |          |          |          |          |      |          |          |          |          |          |  |   |   |   |   |    |     |          |  |  |  |  |      |          |          |  |  |  |     |          |          |          |  |  |     |          |          |          |          |  |      |          |          |          |          |          |
| 6 B                                                                                                                                          | 2.697415                                                                                                                                                                                                                                                                                                                                                                                                                                                                                                                                                                                                                                                                                                                                                                                                                                                                                                                                                                                                                                                                                                                                                                                                                                                                                                                                                                                                                                                                                                                                                                                                                                                                                                                        | 1.736650 | 2.997260 | 1.774778 | 2.112208 |   |   |     |          |  |  |  |  |      |          |          |  |  |  |     |          |          |          |  |  |     |          |          |          |          |  |     |          |          |          |          |          |     |          |          |          |          |          |      |          |          |          |          |          |     |          |          |          |          |          |     |          |          |          |          |          |      |          |          |          |          |          |  |   |   |   |   |    |     |          |  |  |  |  |      |          |          |  |  |  |     |          |          |          |  |  |     |          |          |          |          |  |      |          |          |          |          |          |
| 7 Fe                                                                                                                                         | 2.846195                                                                                                                                                                                                                                                                                                                                                                                                                                                                                                                                                                                                                                                                                                                                                                                                                                                                                                                                                                                                                                                                                                                                                                                                                                                                                                                                                                                                                                                                                                                                                                                                                                                                                                                        | 2.141667 | 2.179205 | 3.216527 | 2.108920 |   |   |     |          |  |  |  |  |      |          |          |  |  |  |     |          |          |          |  |  |     |          |          |          |          |  |     |          |          |          |          |          |     |          |          |          |          |          |      |          |          |          |          |          |     |          |          |          |          |          |     |          |          |          |          |          |      |          |          |          |          |          |  |   |   |   |   |    |     |          |  |  |  |  |      |          |          |  |  |  |     |          |          |          |  |  |     |          |          |          |          |  |      |          |          |          |          |          |
| 8 B                                                                                                                                          | 1.680812                                                                                                                                                                                                                                                                                                                                                                                                                                                                                                                                                                                                                                                                                                                                                                                                                                                                                                                                                                                                                                                                                                                                                                                                                                                                                                                                                                                                                                                                                                                                                                                                                                                                                                                        | 2.809483 | 1.852332 | 1.794531 | 2.034294 |   |   |     |          |  |  |  |  |      |          |          |  |  |  |     |          |          |          |  |  |     |          |          |          |          |  |     |          |          |          |          |          |     |          |          |          |          |          |      |          |          |          |          |          |     |          |          |          |          |          |     |          |          |          |          |          |      |          |          |          |          |          |  |   |   |   |   |    |     |          |  |  |  |  |      |          |          |  |  |  |     |          |          |          |  |  |     |          |          |          |          |  |      |          |          |          |          |          |
| 9 B                                                                                                                                          | 1.647085                                                                                                                                                                                                                                                                                                                                                                                                                                                                                                                                                                                                                                                                                                                                                                                                                                                                                                                                                                                                                                                                                                                                                                                                                                                                                                                                                                                                                                                                                                                                                                                                                                                                                                                        | 1.714302 | 1.705230 | 2.908283 | 3.077668 |   |   |     |          |  |  |  |  |      |          |          |  |  |  |     |          |          |          |  |  |     |          |          |          |          |  |     |          |          |          |          |          |     |          |          |          |          |          |      |          |          |          |          |          |     |          |          |          |          |          |     |          |          |          |          |          |      |          |          |          |          |          |  |   |   |   |   |    |     |          |  |  |  |  |      |          |          |  |  |  |     |          |          |          |  |  |     |          |          |          |          |  |      |          |          |          |          |          |
| 10 B                                                                                                                                         | 2.806026                                                                                                                                                                                                                                                                                                                                                                                                                                                                                                                                                                                                                                                                                                                                                                                                                                                                                                                                                                                                                                                                                                                                                                                                                                                                                                                                                                                                                                                                                                                                                                                                                                                                                                                        | 2.921840 | 3.020696 | 1.686925 | 1.870218 |   |   |     |          |  |  |  |  |      |          |          |  |  |  |     |          |          |          |  |  |     |          |          |          |          |  |     |          |          |          |          |          |     |          |          |          |          |          |      |          |          |          |          |          |     |          |          |          |          |          |     |          |          |          |          |          |      |          |          |          |          |          |  |   |   |   |   |    |     |          |  |  |  |  |      |          |          |  |  |  |     |          |          |          |  |  |     |          |          |          |          |  |      |          |          |          |          |          |
|                                                                                                                                              | 6                                                                                                                                                                                                                                                                                                                                                                                                                                                                                                                                                                                                                                                                                                                                                                                                                                                                                                                                                                                                                                                                                                                                                                                                                                                                                                                                                                                                                                                                                                                                                                                                                                                                                                                               | 7        | 8        | 9        | 10       |   |   |     |          |  |  |  |  |      |          |          |  |  |  |     |          |          |          |  |  |     |          |          |          |          |  |     |          |          |          |          |          |     |          |          |          |          |          |      |          |          |          |          |          |     |          |          |          |          |          |     |          |          |          |          |          |      |          |          |          |          |          |  |   |   |   |   |    |     |          |  |  |  |  |      |          |          |  |  |  |     |          |          |          |  |  |     |          |          |          |          |  |      |          |          |          |          |          |
| 6 B                                                                                                                                          | 0.000000                                                                                                                                                                                                                                                                                                                                                                                                                                                                                                                                                                                                                                                                                                                                                                                                                                                                                                                                                                                                                                                                                                                                                                                                                                                                                                                                                                                                                                                                                                                                                                                                                                                                                                                        |          |          |          |          |   |   |     |          |  |  |  |  |      |          |          |  |  |  |     |          |          |          |  |  |     |          |          |          |          |  |     |          |          |          |          |          |     |          |          |          |          |          |      |          |          |          |          |          |     |          |          |          |          |          |     |          |          |          |          |          |      |          |          |          |          |          |  |   |   |   |   |    |     |          |  |  |  |  |      |          |          |  |  |  |     |          |          |          |  |  |     |          |          |          |          |  |      |          |          |          |          |          |
| 7 Fe                                                                                                                                         | 2.166956                                                                                                                                                                                                                                                                                                                                                                                                                                                                                                                                                                                                                                                                                                                                                                                                                                                                                                                                                                                                                                                                                                                                                                                                                                                                                                                                                                                                                                                                                                                                                                                                                                                                                                                        | 0.000000 |          |          |          |   |   |     |          |  |  |  |  |      |          |          |  |  |  |     |          |          |          |  |  |     |          |          |          |          |  |     |          |          |          |          |          |     |          |          |          |          |          |      |          |          |          |          |          |     |          |          |          |          |          |     |          |          |          |          |          |      |          |          |          |          |          |  |   |   |   |   |    |     |          |  |  |  |  |      |          |          |  |  |  |     |          |          |          |  |  |     |          |          |          |          |  |      |          |          |          |          |          |
| 8 B                                                                                                                                          | 2.693524                                                                                                                                                                                                                                                                                                                                                                                                                                                                                                                                                                                                                                                                                                                                                                                                                                                                                                                                                                                                                                                                                                                                                                                                                                                                                                                                                                                                                                                                                                                                                                                                                                                                                                                        | 3.267162 | 0.000000 |          |          |   |   |     |          |  |  |  |  |      |          |          |  |  |  |     |          |          |          |  |  |     |          |          |          |          |  |     |          |          |          |          |          |     |          |          |          |          |          |      |          |          |          |          |          |     |          |          |          |          |          |     |          |          |          |          |          |      |          |          |          |          |          |  |   |   |   |   |    |     |          |  |  |  |  |      |          |          |  |  |  |     |          |          |          |  |  |     |          |          |          |          |  |      |          |          |          |          |          |
| 9 B                                                                                                                                          | 2.977406                                                                                                                                                                                                                                                                                                                                                                                                                                                                                                                                                                                                                                                                                                                                                                                                                                                                                                                                                                                                                                                                                                                                                                                                                                                                                                                                                                                                                                                                                                                                                                                                                                                                                                                        | 1.959589 | 2.937249 | 0.000000 |          |   |   |     |          |  |  |  |  |      |          |          |  |  |  |     |          |          |          |  |  |     |          |          |          |          |  |     |          |          |          |          |          |     |          |          |          |          |          |      |          |          |          |          |          |     |          |          |          |          |          |     |          |          |          |          |          |      |          |          |          |          |          |  |   |   |   |   |    |     |          |  |  |  |  |      |          |          |  |  |  |     |          |          |          |  |  |     |          |          |          |          |  |      |          |          |          |          |          |
| 10 B                                                                                                                                         | 1.795290                                                                                                                                                                                                                                                                                                                                                                                                                                                                                                                                                                                                                                                                                                                                                                                                                                                                                                                                                                                                                                                                                                                                                                                                                                                                                                                                                                                                                                                                                                                                                                                                                                                                                                                        | 3.314006 | 1.749125 | 3.781866 | 0.000000 |   |   |     |          |  |  |  |  |      |          |          |  |  |  |     |          |          |          |  |  |     |          |          |          |          |  |     |          |          |          |          |          |     |          |          |          |          |          |      |          |          |          |          |          |     |          |          |          |          |          |     |          |          |          |          |          |      |          |          |          |          |          |  |   |   |   |   |    |     |          |  |  |  |  |      |          |          |  |  |  |     |          |          |          |  |  |     |          |          |          |          |  |      |          |          |          |          |          |
|  <p>8. -2055.14245680 +20.5<br/>C<sub>1</sub> H/L 2.19</p> | <table border="1"> <thead> <tr> <th></th> <th>1</th> <th>2</th> <th>3</th> <th>4</th> <th>5</th> </tr> </thead> <tbody> <tr><td>1 B</td><td>0.000000</td><td></td><td></td><td></td><td></td></tr> <tr><td>2 Fe</td><td>2.131479</td><td>0.000000</td><td></td><td></td><td></td></tr> <tr><td>3 B</td><td>2.638015</td><td>2.203141</td><td>0.000000</td><td></td><td></td></tr> <tr><td>4 B</td><td>1.833253</td><td>2.954838</td><td>1.779923</td><td>0.000000</td><td></td></tr> <tr><td>5 C</td><td>1.592457</td><td>2.051993</td><td>2.957223</td><td>2.710614</td><td>0.000000</td></tr> <tr><td>6 P</td><td>3.174343</td><td>2.144192</td><td>1.932271</td><td>3.045348</td><td>2.410986</td></tr> <tr><td>7 B</td><td>2.812508</td><td>3.192787</td><td>1.850822</td><td>1.767777</td><td>2.624466</td></tr> <tr><td>8 B</td><td>1.794101</td><td>3.138325</td><td>2.811791</td><td>1.780541</td><td>1.679171</td></tr> <tr><td>9 B</td><td>2.835505</td><td>2.997396</td><td>2.965804</td><td>2.954941</td><td>1.650487</td></tr> <tr><td>10 B</td><td>1.739367</td><td>1.970806</td><td>1.719359</td><td>1.727104</td><td>2.860395</td></tr> <tr> <th></th> <th>6</th> <th>7</th> <th>8</th> <th>9</th> <th>10</th> </tr> <tr><td>6 P</td><td>0.000000</td><td></td><td></td><td></td><td></td></tr> <tr><td>7 B</td><td>2.031900</td><td>0.000000</td><td></td><td></td><td></td></tr> <tr><td>8 B</td><td>2.888876</td><td>1.739213</td><td>0.000000</td><td></td><td></td></tr> <tr><td>9 B</td><td>1.876912</td><td>1.824438</td><td>1.727459</td><td>0.000000</td><td></td></tr> <tr><td>10 B</td><td>3.124551</td><td>2.956413</td><td>2.926582</td><td>3.692384</td><td>0.000000</td></tr> </tbody> </table>  |          | 1        | 2        | 3        | 4 | 5 | 1 B | 0.000000 |  |  |  |  | 2 Fe | 2.131479 | 0.000000 |  |  |  | 3 B | 2.638015 | 2.203141 | 0.000000 |  |  | 4 B | 1.833253 | 2.954838 | 1.779923 | 0.000000 |  | 5 C | 1.592457 | 2.051993 | 2.957223 | 2.710614 | 0.000000 | 6 P | 3.174343 | 2.144192 | 1.932271 | 3.045348 | 2.410986 | 7 B  | 2.812508 | 3.192787 | 1.850822 | 1.767777 | 2.624466 | 8 B | 1.794101 | 3.138325 | 2.811791 | 1.780541 | 1.679171 | 9 B | 2.835505 | 2.997396 | 2.965804 | 2.954941 | 1.650487 | 10 B | 1.739367 | 1.970806 | 1.719359 | 1.727104 | 2.860395 |  | 6 | 7 | 8 | 9 | 10 | 6 P | 0.000000 |  |  |  |  | 7 B  | 2.031900 | 0.000000 |  |  |  | 8 B | 2.888876 | 1.739213 | 0.000000 |  |  | 9 B | 1.876912 | 1.824438 | 1.727459 | 0.000000 |  | 10 B | 3.124551 | 2.956413 | 2.926582 | 3.692384 | 0.000000 |
|                                                                                                                                              | 1                                                                                                                                                                                                                                                                                                                                                                                                                                                                                                                                                                                                                                                                                                                                                                                                                                                                                                                                                                                                                                                                                                                                                                                                                                                                                                                                                                                                                                                                                                                                                                                                                                                                                                                               | 2        | 3        | 4        | 5        |   |   |     |          |  |  |  |  |      |          |          |  |  |  |     |          |          |          |  |  |     |          |          |          |          |  |     |          |          |          |          |          |     |          |          |          |          |          |      |          |          |          |          |          |     |          |          |          |          |          |     |          |          |          |          |          |      |          |          |          |          |          |  |   |   |   |   |    |     |          |  |  |  |  |      |          |          |  |  |  |     |          |          |          |  |  |     |          |          |          |          |  |      |          |          |          |          |          |
| 1 B                                                                                                                                          | 0.000000                                                                                                                                                                                                                                                                                                                                                                                                                                                                                                                                                                                                                                                                                                                                                                                                                                                                                                                                                                                                                                                                                                                                                                                                                                                                                                                                                                                                                                                                                                                                                                                                                                                                                                                        |          |          |          |          |   |   |     |          |  |  |  |  |      |          |          |  |  |  |     |          |          |          |  |  |     |          |          |          |          |  |     |          |          |          |          |          |     |          |          |          |          |          |      |          |          |          |          |          |     |          |          |          |          |          |     |          |          |          |          |          |      |          |          |          |          |          |  |   |   |   |   |    |     |          |  |  |  |  |      |          |          |  |  |  |     |          |          |          |  |  |     |          |          |          |          |  |      |          |          |          |          |          |
| 2 Fe                                                                                                                                         | 2.131479                                                                                                                                                                                                                                                                                                                                                                                                                                                                                                                                                                                                                                                                                                                                                                                                                                                                                                                                                                                                                                                                                                                                                                                                                                                                                                                                                                                                                                                                                                                                                                                                                                                                                                                        | 0.000000 |          |          |          |   |   |     |          |  |  |  |  |      |          |          |  |  |  |     |          |          |          |  |  |     |          |          |          |          |  |     |          |          |          |          |          |     |          |          |          |          |          |      |          |          |          |          |          |     |          |          |          |          |          |     |          |          |          |          |          |      |          |          |          |          |          |  |   |   |   |   |    |     |          |  |  |  |  |      |          |          |  |  |  |     |          |          |          |  |  |     |          |          |          |          |  |      |          |          |          |          |          |
| 3 B                                                                                                                                          | 2.638015                                                                                                                                                                                                                                                                                                                                                                                                                                                                                                                                                                                                                                                                                                                                                                                                                                                                                                                                                                                                                                                                                                                                                                                                                                                                                                                                                                                                                                                                                                                                                                                                                                                                                                                        | 2.203141 | 0.000000 |          |          |   |   |     |          |  |  |  |  |      |          |          |  |  |  |     |          |          |          |  |  |     |          |          |          |          |  |     |          |          |          |          |          |     |          |          |          |          |          |      |          |          |          |          |          |     |          |          |          |          |          |     |          |          |          |          |          |      |          |          |          |          |          |  |   |   |   |   |    |     |          |  |  |  |  |      |          |          |  |  |  |     |          |          |          |  |  |     |          |          |          |          |  |      |          |          |          |          |          |
| 4 B                                                                                                                                          | 1.833253                                                                                                                                                                                                                                                                                                                                                                                                                                                                                                                                                                                                                                                                                                                                                                                                                                                                                                                                                                                                                                                                                                                                                                                                                                                                                                                                                                                                                                                                                                                                                                                                                                                                                                                        | 2.954838 | 1.779923 | 0.000000 |          |   |   |     |          |  |  |  |  |      |          |          |  |  |  |     |          |          |          |  |  |     |          |          |          |          |  |     |          |          |          |          |          |     |          |          |          |          |          |      |          |          |          |          |          |     |          |          |          |          |          |     |          |          |          |          |          |      |          |          |          |          |          |  |   |   |   |   |    |     |          |  |  |  |  |      |          |          |  |  |  |     |          |          |          |  |  |     |          |          |          |          |  |      |          |          |          |          |          |
| 5 C                                                                                                                                          | 1.592457                                                                                                                                                                                                                                                                                                                                                                                                                                                                                                                                                                                                                                                                                                                                                                                                                                                                                                                                                                                                                                                                                                                                                                                                                                                                                                                                                                                                                                                                                                                                                                                                                                                                                                                        | 2.051993 | 2.957223 | 2.710614 | 0.000000 |   |   |     |          |  |  |  |  |      |          |          |  |  |  |     |          |          |          |  |  |     |          |          |          |          |  |     |          |          |          |          |          |     |          |          |          |          |          |      |          |          |          |          |          |     |          |          |          |          |          |     |          |          |          |          |          |      |          |          |          |          |          |  |   |   |   |   |    |     |          |  |  |  |  |      |          |          |  |  |  |     |          |          |          |  |  |     |          |          |          |          |  |      |          |          |          |          |          |
| 6 P                                                                                                                                          | 3.174343                                                                                                                                                                                                                                                                                                                                                                                                                                                                                                                                                                                                                                                                                                                                                                                                                                                                                                                                                                                                                                                                                                                                                                                                                                                                                                                                                                                                                                                                                                                                                                                                                                                                                                                        | 2.144192 | 1.932271 | 3.045348 | 2.410986 |   |   |     |          |  |  |  |  |      |          |          |  |  |  |     |          |          |          |  |  |     |          |          |          |          |  |     |          |          |          |          |          |     |          |          |          |          |          |      |          |          |          |          |          |     |          |          |          |          |          |     |          |          |          |          |          |      |          |          |          |          |          |  |   |   |   |   |    |     |          |  |  |  |  |      |          |          |  |  |  |     |          |          |          |  |  |     |          |          |          |          |  |      |          |          |          |          |          |
| 7 B                                                                                                                                          | 2.812508                                                                                                                                                                                                                                                                                                                                                                                                                                                                                                                                                                                                                                                                                                                                                                                                                                                                                                                                                                                                                                                                                                                                                                                                                                                                                                                                                                                                                                                                                                                                                                                                                                                                                                                        | 3.192787 | 1.850822 | 1.767777 | 2.624466 |   |   |     |          |  |  |  |  |      |          |          |  |  |  |     |          |          |          |  |  |     |          |          |          |          |  |     |          |          |          |          |          |     |          |          |          |          |          |      |          |          |          |          |          |     |          |          |          |          |          |     |          |          |          |          |          |      |          |          |          |          |          |  |   |   |   |   |    |     |          |  |  |  |  |      |          |          |  |  |  |     |          |          |          |  |  |     |          |          |          |          |  |      |          |          |          |          |          |
| 8 B                                                                                                                                          | 1.794101                                                                                                                                                                                                                                                                                                                                                                                                                                                                                                                                                                                                                                                                                                                                                                                                                                                                                                                                                                                                                                                                                                                                                                                                                                                                                                                                                                                                                                                                                                                                                                                                                                                                                                                        | 3.138325 | 2.811791 | 1.780541 | 1.679171 |   |   |     |          |  |  |  |  |      |          |          |  |  |  |     |          |          |          |  |  |     |          |          |          |          |  |     |          |          |          |          |          |     |          |          |          |          |          |      |          |          |          |          |          |     |          |          |          |          |          |     |          |          |          |          |          |      |          |          |          |          |          |  |   |   |   |   |    |     |          |  |  |  |  |      |          |          |  |  |  |     |          |          |          |  |  |     |          |          |          |          |  |      |          |          |          |          |          |
| 9 B                                                                                                                                          | 2.835505                                                                                                                                                                                                                                                                                                                                                                                                                                                                                                                                                                                                                                                                                                                                                                                                                                                                                                                                                                                                                                                                                                                                                                                                                                                                                                                                                                                                                                                                                                                                                                                                                                                                                                                        | 2.997396 | 2.965804 | 2.954941 | 1.650487 |   |   |     |          |  |  |  |  |      |          |          |  |  |  |     |          |          |          |  |  |     |          |          |          |          |  |     |          |          |          |          |          |     |          |          |          |          |          |      |          |          |          |          |          |     |          |          |          |          |          |     |          |          |          |          |          |      |          |          |          |          |          |  |   |   |   |   |    |     |          |  |  |  |  |      |          |          |  |  |  |     |          |          |          |  |  |     |          |          |          |          |  |      |          |          |          |          |          |
| 10 B                                                                                                                                         | 1.739367                                                                                                                                                                                                                                                                                                                                                                                                                                                                                                                                                                                                                                                                                                                                                                                                                                                                                                                                                                                                                                                                                                                                                                                                                                                                                                                                                                                                                                                                                                                                                                                                                                                                                                                        | 1.970806 | 1.719359 | 1.727104 | 2.860395 |   |   |     |          |  |  |  |  |      |          |          |  |  |  |     |          |          |          |  |  |     |          |          |          |          |  |     |          |          |          |          |          |     |          |          |          |          |          |      |          |          |          |          |          |     |          |          |          |          |          |     |          |          |          |          |          |      |          |          |          |          |          |  |   |   |   |   |    |     |          |  |  |  |  |      |          |          |  |  |  |     |          |          |          |  |  |     |          |          |          |          |  |      |          |          |          |          |          |
|                                                                                                                                              | 6                                                                                                                                                                                                                                                                                                                                                                                                                                                                                                                                                                                                                                                                                                                                                                                                                                                                                                                                                                                                                                                                                                                                                                                                                                                                                                                                                                                                                                                                                                                                                                                                                                                                                                                               | 7        | 8        | 9        | 10       |   |   |     |          |  |  |  |  |      |          |          |  |  |  |     |          |          |          |  |  |     |          |          |          |          |  |     |          |          |          |          |          |     |          |          |          |          |          |      |          |          |          |          |          |     |          |          |          |          |          |     |          |          |          |          |          |      |          |          |          |          |          |  |   |   |   |   |    |     |          |  |  |  |  |      |          |          |  |  |  |     |          |          |          |  |  |     |          |          |          |          |  |      |          |          |          |          |          |
| 6 P                                                                                                                                          | 0.000000                                                                                                                                                                                                                                                                                                                                                                                                                                                                                                                                                                                                                                                                                                                                                                                                                                                                                                                                                                                                                                                                                                                                                                                                                                                                                                                                                                                                                                                                                                                                                                                                                                                                                                                        |          |          |          |          |   |   |     |          |  |  |  |  |      |          |          |  |  |  |     |          |          |          |  |  |     |          |          |          |          |  |     |          |          |          |          |          |     |          |          |          |          |          |      |          |          |          |          |          |     |          |          |          |          |          |     |          |          |          |          |          |      |          |          |          |          |          |  |   |   |   |   |    |     |          |  |  |  |  |      |          |          |  |  |  |     |          |          |          |  |  |     |          |          |          |          |  |      |          |          |          |          |          |
| 7 B                                                                                                                                          | 2.031900                                                                                                                                                                                                                                                                                                                                                                                                                                                                                                                                                                                                                                                                                                                                                                                                                                                                                                                                                                                                                                                                                                                                                                                                                                                                                                                                                                                                                                                                                                                                                                                                                                                                                                                        | 0.000000 |          |          |          |   |   |     |          |  |  |  |  |      |          |          |  |  |  |     |          |          |          |  |  |     |          |          |          |          |  |     |          |          |          |          |          |     |          |          |          |          |          |      |          |          |          |          |          |     |          |          |          |          |          |     |          |          |          |          |          |      |          |          |          |          |          |  |   |   |   |   |    |     |          |  |  |  |  |      |          |          |  |  |  |     |          |          |          |  |  |     |          |          |          |          |  |      |          |          |          |          |          |
| 8 B                                                                                                                                          | 2.888876                                                                                                                                                                                                                                                                                                                                                                                                                                                                                                                                                                                                                                                                                                                                                                                                                                                                                                                                                                                                                                                                                                                                                                                                                                                                                                                                                                                                                                                                                                                                                                                                                                                                                                                        | 1.739213 | 0.000000 |          |          |   |   |     |          |  |  |  |  |      |          |          |  |  |  |     |          |          |          |  |  |     |          |          |          |          |  |     |          |          |          |          |          |     |          |          |          |          |          |      |          |          |          |          |          |     |          |          |          |          |          |     |          |          |          |          |          |      |          |          |          |          |          |  |   |   |   |   |    |     |          |  |  |  |  |      |          |          |  |  |  |     |          |          |          |  |  |     |          |          |          |          |  |      |          |          |          |          |          |
| 9 B                                                                                                                                          | 1.876912                                                                                                                                                                                                                                                                                                                                                                                                                                                                                                                                                                                                                                                                                                                                                                                                                                                                                                                                                                                                                                                                                                                                                                                                                                                                                                                                                                                                                                                                                                                                                                                                                                                                                                                        | 1.824438 | 1.727459 | 0.000000 |          |   |   |     |          |  |  |  |  |      |          |          |  |  |  |     |          |          |          |  |  |     |          |          |          |          |  |     |          |          |          |          |          |     |          |          |          |          |          |      |          |          |          |          |          |     |          |          |          |          |          |     |          |          |          |          |          |      |          |          |          |          |          |  |   |   |   |   |    |     |          |  |  |  |  |      |          |          |  |  |  |     |          |          |          |  |  |     |          |          |          |          |  |      |          |          |          |          |          |
| 10 B                                                                                                                                         | 3.124551                                                                                                                                                                                                                                                                                                                                                                                                                                                                                                                                                                                                                                                                                                                                                                                                                                                                                                                                                                                                                                                                                                                                                                                                                                                                                                                                                                                                                                                                                                                                                                                                                                                                                                                        | 2.956413 | 2.926582 | 3.692384 | 0.000000 |   |   |     |          |  |  |  |  |      |          |          |  |  |  |     |          |          |          |  |  |     |          |          |          |          |  |     |          |          |          |          |          |     |          |          |          |          |          |      |          |          |          |          |          |     |          |          |          |          |          |     |          |          |          |          |          |      |          |          |          |          |          |  |   |   |   |   |    |     |          |  |  |  |  |      |          |          |  |  |  |     |          |          |          |  |  |     |          |          |          |          |  |      |          |          |          |          |          |



| 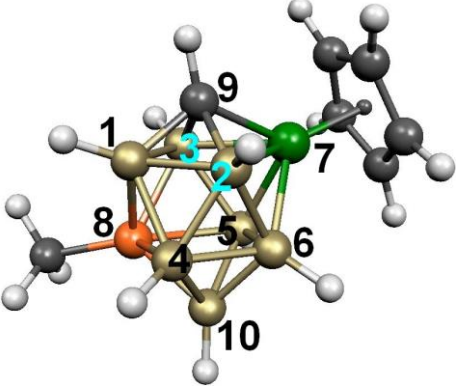 <p>9. -2055.14038670 +21.8<br/>C<sub>1</sub> H/L 2.43</p>   | <table border="1"> <thead> <tr> <th></th> <th>1</th> <th>2</th> <th>3</th> <th>4</th> <th>5</th> </tr> </thead> <tbody> <tr><td>1 B</td><td>0.000000</td><td></td><td></td><td></td><td></td></tr> <tr><td>2 B</td><td>1.799446</td><td>0.000000</td><td></td><td></td><td></td></tr> <tr><td>3 B</td><td>1.962774</td><td>2.600259</td><td>0.000000</td><td></td><td></td></tr> <tr><td>4 B</td><td>1.842073</td><td>1.803028</td><td>2.951976</td><td>0.000000</td><td></td></tr> <tr><td>5 B</td><td>3.025717</td><td>2.863232</td><td>1.947554</td><td>2.723896</td><td>0.000000</td></tr> <tr><td>6 B</td><td>2.842327</td><td>1.805798</td><td>2.853611</td><td>1.823766</td><td>1.791947</td></tr> <tr><td>7 Fe</td><td>2.990817</td><td>2.110784</td><td>2.063926</td><td>3.236608</td><td>2.002281</td></tr> <tr><td>8 P</td><td>1.993516</td><td>2.984651</td><td>1.986024</td><td>2.012620</td><td>2.080966</td></tr> <tr><td>9 C</td><td>1.580812</td><td>1.612587</td><td>1.606759</td><td>2.812793</td><td>2.897846</td></tr> <tr><td>10 B</td><td>3.050559</td><td>2.966533</td><td>3.081559</td><td>1.774268</td><td>1.816268</td></tr> <tr> <th></th> <th>6</th> <th>7</th> <th>8</th> <th>9</th> <th>10</th> </tr> <tr><td>6 B</td><td>0.000000</td><td></td><td></td><td></td><td></td></tr> <tr><td>7 Fe</td><td>2.064923</td><td>0.000000</td><td></td><td></td><td></td></tr> <tr><td>8 P</td><td>2.716830</td><td>3.347679</td><td>0.000000</td><td></td><td></td></tr> <tr><td>9 C</td><td>2.823045</td><td>1.899653</td><td>2.924061</td><td>0.000000</td><td></td></tr> <tr><td>10 B</td><td>1.697795</td><td>3.298303</td><td>1.859668</td><td>3.675948</td><td>0.000000</td></tr> </tbody> </table> |          | 1        | 2        | 3        | 4 | 5 | 1 B | 0.000000 |  |  |  |  | 2 B | 1.799446 | 0.000000 |  |  |  | 3 B | 1.962774 | 2.600259 | 0.000000 |  |  | 4 B | 1.842073 | 1.803028 | 2.951976 | 0.000000 |  | 5 B | 3.025717 | 2.863232 | 1.947554 | 2.723896 | 0.000000 | 6 B | 2.842327 | 1.805798 | 2.853611 | 1.823766 | 1.791947 | 7 Fe | 2.990817 | 2.110784 | 2.063926 | 3.236608 | 2.002281 | 8 P | 1.993516 | 2.984651 | 1.986024 | 2.012620 | 2.080966 | 9 C | 1.580812 | 1.612587 | 1.606759 | 2.812793 | 2.897846 | 10 B  | 3.050559 | 2.966533 | 3.081559 | 1.774268 | 1.816268 |  | 6 | 7 | 8 | 9 | 10 | 6 B | 0.000000 |  |  |  |  | 7 Fe | 2.064923 | 0.000000 |  |  |  | 8 P | 2.716830 | 3.347679 | 0.000000 |  |  | 9 C | 2.823045 | 1.899653 | 2.924061 | 0.000000 |  | 10 B  | 1.697795 | 3.298303 | 1.859668 | 3.675948 | 0.000000 |
|-----------------------------------------------------------------------------------------------------------------------------------------------|---------------------------------------------------------------------------------------------------------------------------------------------------------------------------------------------------------------------------------------------------------------------------------------------------------------------------------------------------------------------------------------------------------------------------------------------------------------------------------------------------------------------------------------------------------------------------------------------------------------------------------------------------------------------------------------------------------------------------------------------------------------------------------------------------------------------------------------------------------------------------------------------------------------------------------------------------------------------------------------------------------------------------------------------------------------------------------------------------------------------------------------------------------------------------------------------------------------------------------------------------------------------------------------------------------------------------------------------------------------------------------------------------------------------------------------------------------------------------------------------------------------------------------------------------------------------------------------------------------------------------------------------------------------------------------------------------------------------------------|----------|----------|----------|----------|---|---|-----|----------|--|--|--|--|-----|----------|----------|--|--|--|-----|----------|----------|----------|--|--|-----|----------|----------|----------|----------|--|-----|----------|----------|----------|----------|----------|-----|----------|----------|----------|----------|----------|------|----------|----------|----------|----------|----------|-----|----------|----------|----------|----------|----------|-----|----------|----------|----------|----------|----------|-------|----------|----------|----------|----------|----------|--|---|---|---|---|----|-----|----------|--|--|--|--|------|----------|----------|--|--|--|-----|----------|----------|----------|--|--|-----|----------|----------|----------|----------|--|-------|----------|----------|----------|----------|----------|
|                                                                                                                                               | 1                                                                                                                                                                                                                                                                                                                                                                                                                                                                                                                                                                                                                                                                                                                                                                                                                                                                                                                                                                                                                                                                                                                                                                                                                                                                                                                                                                                                                                                                                                                                                                                                                                                                                                                               | 2        | 3        | 4        | 5        |   |   |     |          |  |  |  |  |     |          |          |  |  |  |     |          |          |          |  |  |     |          |          |          |          |  |     |          |          |          |          |          |     |          |          |          |          |          |      |          |          |          |          |          |     |          |          |          |          |          |     |          |          |          |          |          |       |          |          |          |          |          |  |   |   |   |   |    |     |          |  |  |  |  |      |          |          |  |  |  |     |          |          |          |  |  |     |          |          |          |          |  |       |          |          |          |          |          |
| 1 B                                                                                                                                           | 0.000000                                                                                                                                                                                                                                                                                                                                                                                                                                                                                                                                                                                                                                                                                                                                                                                                                                                                                                                                                                                                                                                                                                                                                                                                                                                                                                                                                                                                                                                                                                                                                                                                                                                                                                                        |          |          |          |          |   |   |     |          |  |  |  |  |     |          |          |  |  |  |     |          |          |          |  |  |     |          |          |          |          |  |     |          |          |          |          |          |     |          |          |          |          |          |      |          |          |          |          |          |     |          |          |          |          |          |     |          |          |          |          |          |       |          |          |          |          |          |  |   |   |   |   |    |     |          |  |  |  |  |      |          |          |  |  |  |     |          |          |          |  |  |     |          |          |          |          |  |       |          |          |          |          |          |
| 2 B                                                                                                                                           | 1.799446                                                                                                                                                                                                                                                                                                                                                                                                                                                                                                                                                                                                                                                                                                                                                                                                                                                                                                                                                                                                                                                                                                                                                                                                                                                                                                                                                                                                                                                                                                                                                                                                                                                                                                                        | 0.000000 |          |          |          |   |   |     |          |  |  |  |  |     |          |          |  |  |  |     |          |          |          |  |  |     |          |          |          |          |  |     |          |          |          |          |          |     |          |          |          |          |          |      |          |          |          |          |          |     |          |          |          |          |          |     |          |          |          |          |          |       |          |          |          |          |          |  |   |   |   |   |    |     |          |  |  |  |  |      |          |          |  |  |  |     |          |          |          |  |  |     |          |          |          |          |  |       |          |          |          |          |          |
| 3 B                                                                                                                                           | 1.962774                                                                                                                                                                                                                                                                                                                                                                                                                                                                                                                                                                                                                                                                                                                                                                                                                                                                                                                                                                                                                                                                                                                                                                                                                                                                                                                                                                                                                                                                                                                                                                                                                                                                                                                        | 2.600259 | 0.000000 |          |          |   |   |     |          |  |  |  |  |     |          |          |  |  |  |     |          |          |          |  |  |     |          |          |          |          |  |     |          |          |          |          |          |     |          |          |          |          |          |      |          |          |          |          |          |     |          |          |          |          |          |     |          |          |          |          |          |       |          |          |          |          |          |  |   |   |   |   |    |     |          |  |  |  |  |      |          |          |  |  |  |     |          |          |          |  |  |     |          |          |          |          |  |       |          |          |          |          |          |
| 4 B                                                                                                                                           | 1.842073                                                                                                                                                                                                                                                                                                                                                                                                                                                                                                                                                                                                                                                                                                                                                                                                                                                                                                                                                                                                                                                                                                                                                                                                                                                                                                                                                                                                                                                                                                                                                                                                                                                                                                                        | 1.803028 | 2.951976 | 0.000000 |          |   |   |     |          |  |  |  |  |     |          |          |  |  |  |     |          |          |          |  |  |     |          |          |          |          |  |     |          |          |          |          |          |     |          |          |          |          |          |      |          |          |          |          |          |     |          |          |          |          |          |     |          |          |          |          |          |       |          |          |          |          |          |  |   |   |   |   |    |     |          |  |  |  |  |      |          |          |  |  |  |     |          |          |          |  |  |     |          |          |          |          |  |       |          |          |          |          |          |
| 5 B                                                                                                                                           | 3.025717                                                                                                                                                                                                                                                                                                                                                                                                                                                                                                                                                                                                                                                                                                                                                                                                                                                                                                                                                                                                                                                                                                                                                                                                                                                                                                                                                                                                                                                                                                                                                                                                                                                                                                                        | 2.863232 | 1.947554 | 2.723896 | 0.000000 |   |   |     |          |  |  |  |  |     |          |          |  |  |  |     |          |          |          |  |  |     |          |          |          |          |  |     |          |          |          |          |          |     |          |          |          |          |          |      |          |          |          |          |          |     |          |          |          |          |          |     |          |          |          |          |          |       |          |          |          |          |          |  |   |   |   |   |    |     |          |  |  |  |  |      |          |          |  |  |  |     |          |          |          |  |  |     |          |          |          |          |  |       |          |          |          |          |          |
| 6 B                                                                                                                                           | 2.842327                                                                                                                                                                                                                                                                                                                                                                                                                                                                                                                                                                                                                                                                                                                                                                                                                                                                                                                                                                                                                                                                                                                                                                                                                                                                                                                                                                                                                                                                                                                                                                                                                                                                                                                        | 1.805798 | 2.853611 | 1.823766 | 1.791947 |   |   |     |          |  |  |  |  |     |          |          |  |  |  |     |          |          |          |  |  |     |          |          |          |          |  |     |          |          |          |          |          |     |          |          |          |          |          |      |          |          |          |          |          |     |          |          |          |          |          |     |          |          |          |          |          |       |          |          |          |          |          |  |   |   |   |   |    |     |          |  |  |  |  |      |          |          |  |  |  |     |          |          |          |  |  |     |          |          |          |          |  |       |          |          |          |          |          |
| 7 Fe                                                                                                                                          | 2.990817                                                                                                                                                                                                                                                                                                                                                                                                                                                                                                                                                                                                                                                                                                                                                                                                                                                                                                                                                                                                                                                                                                                                                                                                                                                                                                                                                                                                                                                                                                                                                                                                                                                                                                                        | 2.110784 | 2.063926 | 3.236608 | 2.002281 |   |   |     |          |  |  |  |  |     |          |          |  |  |  |     |          |          |          |  |  |     |          |          |          |          |  |     |          |          |          |          |          |     |          |          |          |          |          |      |          |          |          |          |          |     |          |          |          |          |          |     |          |          |          |          |          |       |          |          |          |          |          |  |   |   |   |   |    |     |          |  |  |  |  |      |          |          |  |  |  |     |          |          |          |  |  |     |          |          |          |          |  |       |          |          |          |          |          |
| 8 P                                                                                                                                           | 1.993516                                                                                                                                                                                                                                                                                                                                                                                                                                                                                                                                                                                                                                                                                                                                                                                                                                                                                                                                                                                                                                                                                                                                                                                                                                                                                                                                                                                                                                                                                                                                                                                                                                                                                                                        | 2.984651 | 1.986024 | 2.012620 | 2.080966 |   |   |     |          |  |  |  |  |     |          |          |  |  |  |     |          |          |          |  |  |     |          |          |          |          |  |     |          |          |          |          |          |     |          |          |          |          |          |      |          |          |          |          |          |     |          |          |          |          |          |     |          |          |          |          |          |       |          |          |          |          |          |  |   |   |   |   |    |     |          |  |  |  |  |      |          |          |  |  |  |     |          |          |          |  |  |     |          |          |          |          |  |       |          |          |          |          |          |
| 9 C                                                                                                                                           | 1.580812                                                                                                                                                                                                                                                                                                                                                                                                                                                                                                                                                                                                                                                                                                                                                                                                                                                                                                                                                                                                                                                                                                                                                                                                                                                                                                                                                                                                                                                                                                                                                                                                                                                                                                                        | 1.612587 | 1.606759 | 2.812793 | 2.897846 |   |   |     |          |  |  |  |  |     |          |          |  |  |  |     |          |          |          |  |  |     |          |          |          |          |  |     |          |          |          |          |          |     |          |          |          |          |          |      |          |          |          |          |          |     |          |          |          |          |          |     |          |          |          |          |          |       |          |          |          |          |          |  |   |   |   |   |    |     |          |  |  |  |  |      |          |          |  |  |  |     |          |          |          |  |  |     |          |          |          |          |  |       |          |          |          |          |          |
| 10 B                                                                                                                                          | 3.050559                                                                                                                                                                                                                                                                                                                                                                                                                                                                                                                                                                                                                                                                                                                                                                                                                                                                                                                                                                                                                                                                                                                                                                                                                                                                                                                                                                                                                                                                                                                                                                                                                                                                                                                        | 2.966533 | 3.081559 | 1.774268 | 1.816268 |   |   |     |          |  |  |  |  |     |          |          |  |  |  |     |          |          |          |  |  |     |          |          |          |          |  |     |          |          |          |          |          |     |          |          |          |          |          |      |          |          |          |          |          |     |          |          |          |          |          |     |          |          |          |          |          |       |          |          |          |          |          |  |   |   |   |   |    |     |          |  |  |  |  |      |          |          |  |  |  |     |          |          |          |  |  |     |          |          |          |          |  |       |          |          |          |          |          |
|                                                                                                                                               | 6                                                                                                                                                                                                                                                                                                                                                                                                                                                                                                                                                                                                                                                                                                                                                                                                                                                                                                                                                                                                                                                                                                                                                                                                                                                                                                                                                                                                                                                                                                                                                                                                                                                                                                                               | 7        | 8        | 9        | 10       |   |   |     |          |  |  |  |  |     |          |          |  |  |  |     |          |          |          |  |  |     |          |          |          |          |  |     |          |          |          |          |          |     |          |          |          |          |          |      |          |          |          |          |          |     |          |          |          |          |          |     |          |          |          |          |          |       |          |          |          |          |          |  |   |   |   |   |    |     |          |  |  |  |  |      |          |          |  |  |  |     |          |          |          |  |  |     |          |          |          |          |  |       |          |          |          |          |          |
| 6 B                                                                                                                                           | 0.000000                                                                                                                                                                                                                                                                                                                                                                                                                                                                                                                                                                                                                                                                                                                                                                                                                                                                                                                                                                                                                                                                                                                                                                                                                                                                                                                                                                                                                                                                                                                                                                                                                                                                                                                        |          |          |          |          |   |   |     |          |  |  |  |  |     |          |          |  |  |  |     |          |          |          |  |  |     |          |          |          |          |  |     |          |          |          |          |          |     |          |          |          |          |          |      |          |          |          |          |          |     |          |          |          |          |          |     |          |          |          |          |          |       |          |          |          |          |          |  |   |   |   |   |    |     |          |  |  |  |  |      |          |          |  |  |  |     |          |          |          |  |  |     |          |          |          |          |  |       |          |          |          |          |          |
| 7 Fe                                                                                                                                          | 2.064923                                                                                                                                                                                                                                                                                                                                                                                                                                                                                                                                                                                                                                                                                                                                                                                                                                                                                                                                                                                                                                                                                                                                                                                                                                                                                                                                                                                                                                                                                                                                                                                                                                                                                                                        | 0.000000 |          |          |          |   |   |     |          |  |  |  |  |     |          |          |  |  |  |     |          |          |          |  |  |     |          |          |          |          |  |     |          |          |          |          |          |     |          |          |          |          |          |      |          |          |          |          |          |     |          |          |          |          |          |     |          |          |          |          |          |       |          |          |          |          |          |  |   |   |   |   |    |     |          |  |  |  |  |      |          |          |  |  |  |     |          |          |          |  |  |     |          |          |          |          |  |       |          |          |          |          |          |
| 8 P                                                                                                                                           | 2.716830                                                                                                                                                                                                                                                                                                                                                                                                                                                                                                                                                                                                                                                                                                                                                                                                                                                                                                                                                                                                                                                                                                                                                                                                                                                                                                                                                                                                                                                                                                                                                                                                                                                                                                                        | 3.347679 | 0.000000 |          |          |   |   |     |          |  |  |  |  |     |          |          |  |  |  |     |          |          |          |  |  |     |          |          |          |          |  |     |          |          |          |          |          |     |          |          |          |          |          |      |          |          |          |          |          |     |          |          |          |          |          |     |          |          |          |          |          |       |          |          |          |          |          |  |   |   |   |   |    |     |          |  |  |  |  |      |          |          |  |  |  |     |          |          |          |  |  |     |          |          |          |          |  |       |          |          |          |          |          |
| 9 C                                                                                                                                           | 2.823045                                                                                                                                                                                                                                                                                                                                                                                                                                                                                                                                                                                                                                                                                                                                                                                                                                                                                                                                                                                                                                                                                                                                                                                                                                                                                                                                                                                                                                                                                                                                                                                                                                                                                                                        | 1.899653 | 2.924061 | 0.000000 |          |   |   |     |          |  |  |  |  |     |          |          |  |  |  |     |          |          |          |  |  |     |          |          |          |          |  |     |          |          |          |          |          |     |          |          |          |          |          |      |          |          |          |          |          |     |          |          |          |          |          |     |          |          |          |          |          |       |          |          |          |          |          |  |   |   |   |   |    |     |          |  |  |  |  |      |          |          |  |  |  |     |          |          |          |  |  |     |          |          |          |          |  |       |          |          |          |          |          |
| 10 B                                                                                                                                          | 1.697795                                                                                                                                                                                                                                                                                                                                                                                                                                                                                                                                                                                                                                                                                                                                                                                                                                                                                                                                                                                                                                                                                                                                                                                                                                                                                                                                                                                                                                                                                                                                                                                                                                                                                                                        | 3.298303 | 1.859668 | 3.675948 | 0.000000 |   |   |     |          |  |  |  |  |     |          |          |  |  |  |     |          |          |          |  |  |     |          |          |          |          |  |     |          |          |          |          |          |     |          |          |          |          |          |      |          |          |          |          |          |     |          |          |          |          |          |     |          |          |          |          |          |       |          |          |          |          |          |  |   |   |   |   |    |     |          |  |  |  |  |      |          |          |  |  |  |     |          |          |          |  |  |     |          |          |          |          |  |       |          |          |          |          |          |
|  <p>10. -2055.14015130 +21.9<br/>C<sub>s</sub> H/L 1.96</p> | <table border="1"> <thead> <tr> <th></th> <th>1</th> <th>2</th> <th>3</th> <th>4</th> <th>5</th> </tr> </thead> <tbody> <tr><td>1 B</td><td>0.000000</td><td></td><td></td><td></td><td></td></tr> <tr><td>2 B</td><td>1.799514</td><td>0.000000</td><td></td><td></td><td></td></tr> <tr><td>3 P</td><td>2.719301</td><td>2.039009</td><td>0.000000</td><td></td><td></td></tr> <tr><td>4 B</td><td>1.799522</td><td>2.693081</td><td>2.038042</td><td>0.000000</td><td></td></tr> <tr><td>5 B</td><td>1.811662</td><td>1.768940</td><td>3.018432</td><td>2.834895</td><td>0.000000</td></tr> <tr><td>6 B</td><td>2.825184</td><td>1.850396</td><td>2.028468</td><td>2.933820</td><td>1.787845</td></tr> <tr><td>7 B</td><td>2.825815</td><td>2.933548</td><td>2.025987</td><td>1.850302</td><td>2.590280</td></tr> <tr><td>8 B</td><td>1.813011</td><td>2.836374</td><td>3.017914</td><td>1.767994</td><td>1.824434</td></tr> <tr><td>9 C</td><td>2.778269</td><td>2.792649</td><td>2.972920</td><td>2.791728</td><td>1.599322</td></tr> <tr><td>10 Fe</td><td>2.042304</td><td>2.112902</td><td>2.061828</td><td>2.109187</td><td>3.378535</td></tr> <tr> <th></th> <th>6</th> <th>7</th> <th>8</th> <th>9</th> <th>10</th> </tr> <tr><td>6 B</td><td>0.000000</td><td></td><td></td><td></td><td></td></tr> <tr><td>7 B</td><td>1.924455</td><td>0.000000</td><td></td><td></td><td></td></tr> <tr><td>8 B</td><td>2.590040</td><td>1.788683</td><td>0.000000</td><td></td><td></td></tr> <tr><td>9 C</td><td>1.586042</td><td>1.586582</td><td>1.598878</td><td>0.000000</td><td></td></tr> <tr><td>10 Fe</td><td>3.420646</td><td>3.418174</td><td>3.377343</td><td>4.068785</td><td>0.000000</td></tr> </tbody> </table> |          | 1        | 2        | 3        | 4 | 5 | 1 B | 0.000000 |  |  |  |  | 2 B | 1.799514 | 0.000000 |  |  |  | 3 P | 2.719301 | 2.039009 | 0.000000 |  |  | 4 B | 1.799522 | 2.693081 | 2.038042 | 0.000000 |  | 5 B | 1.811662 | 1.768940 | 3.018432 | 2.834895 | 0.000000 | 6 B | 2.825184 | 1.850396 | 2.028468 | 2.933820 | 1.787845 | 7 B  | 2.825815 | 2.933548 | 2.025987 | 1.850302 | 2.590280 | 8 B | 1.813011 | 2.836374 | 3.017914 | 1.767994 | 1.824434 | 9 C | 2.778269 | 2.792649 | 2.972920 | 2.791728 | 1.599322 | 10 Fe | 2.042304 | 2.112902 | 2.061828 | 2.109187 | 3.378535 |  | 6 | 7 | 8 | 9 | 10 | 6 B | 0.000000 |  |  |  |  | 7 B  | 1.924455 | 0.000000 |  |  |  | 8 B | 2.590040 | 1.788683 | 0.000000 |  |  | 9 C | 1.586042 | 1.586582 | 1.598878 | 0.000000 |  | 10 Fe | 3.420646 | 3.418174 | 3.377343 | 4.068785 | 0.000000 |
|                                                                                                                                               | 1                                                                                                                                                                                                                                                                                                                                                                                                                                                                                                                                                                                                                                                                                                                                                                                                                                                                                                                                                                                                                                                                                                                                                                                                                                                                                                                                                                                                                                                                                                                                                                                                                                                                                                                               | 2        | 3        | 4        | 5        |   |   |     |          |  |  |  |  |     |          |          |  |  |  |     |          |          |          |  |  |     |          |          |          |          |  |     |          |          |          |          |          |     |          |          |          |          |          |      |          |          |          |          |          |     |          |          |          |          |          |     |          |          |          |          |          |       |          |          |          |          |          |  |   |   |   |   |    |     |          |  |  |  |  |      |          |          |  |  |  |     |          |          |          |  |  |     |          |          |          |          |  |       |          |          |          |          |          |
| 1 B                                                                                                                                           | 0.000000                                                                                                                                                                                                                                                                                                                                                                                                                                                                                                                                                                                                                                                                                                                                                                                                                                                                                                                                                                                                                                                                                                                                                                                                                                                                                                                                                                                                                                                                                                                                                                                                                                                                                                                        |          |          |          |          |   |   |     |          |  |  |  |  |     |          |          |  |  |  |     |          |          |          |  |  |     |          |          |          |          |  |     |          |          |          |          |          |     |          |          |          |          |          |      |          |          |          |          |          |     |          |          |          |          |          |     |          |          |          |          |          |       |          |          |          |          |          |  |   |   |   |   |    |     |          |  |  |  |  |      |          |          |  |  |  |     |          |          |          |  |  |     |          |          |          |          |  |       |          |          |          |          |          |
| 2 B                                                                                                                                           | 1.799514                                                                                                                                                                                                                                                                                                                                                                                                                                                                                                                                                                                                                                                                                                                                                                                                                                                                                                                                                                                                                                                                                                                                                                                                                                                                                                                                                                                                                                                                                                                                                                                                                                                                                                                        | 0.000000 |          |          |          |   |   |     |          |  |  |  |  |     |          |          |  |  |  |     |          |          |          |  |  |     |          |          |          |          |  |     |          |          |          |          |          |     |          |          |          |          |          |      |          |          |          |          |          |     |          |          |          |          |          |     |          |          |          |          |          |       |          |          |          |          |          |  |   |   |   |   |    |     |          |  |  |  |  |      |          |          |  |  |  |     |          |          |          |  |  |     |          |          |          |          |  |       |          |          |          |          |          |
| 3 P                                                                                                                                           | 2.719301                                                                                                                                                                                                                                                                                                                                                                                                                                                                                                                                                                                                                                                                                                                                                                                                                                                                                                                                                                                                                                                                                                                                                                                                                                                                                                                                                                                                                                                                                                                                                                                                                                                                                                                        | 2.039009 | 0.000000 |          |          |   |   |     |          |  |  |  |  |     |          |          |  |  |  |     |          |          |          |  |  |     |          |          |          |          |  |     |          |          |          |          |          |     |          |          |          |          |          |      |          |          |          |          |          |     |          |          |          |          |          |     |          |          |          |          |          |       |          |          |          |          |          |  |   |   |   |   |    |     |          |  |  |  |  |      |          |          |  |  |  |     |          |          |          |  |  |     |          |          |          |          |  |       |          |          |          |          |          |
| 4 B                                                                                                                                           | 1.799522                                                                                                                                                                                                                                                                                                                                                                                                                                                                                                                                                                                                                                                                                                                                                                                                                                                                                                                                                                                                                                                                                                                                                                                                                                                                                                                                                                                                                                                                                                                                                                                                                                                                                                                        | 2.693081 | 2.038042 | 0.000000 |          |   |   |     |          |  |  |  |  |     |          |          |  |  |  |     |          |          |          |  |  |     |          |          |          |          |  |     |          |          |          |          |          |     |          |          |          |          |          |      |          |          |          |          |          |     |          |          |          |          |          |     |          |          |          |          |          |       |          |          |          |          |          |  |   |   |   |   |    |     |          |  |  |  |  |      |          |          |  |  |  |     |          |          |          |  |  |     |          |          |          |          |  |       |          |          |          |          |          |
| 5 B                                                                                                                                           | 1.811662                                                                                                                                                                                                                                                                                                                                                                                                                                                                                                                                                                                                                                                                                                                                                                                                                                                                                                                                                                                                                                                                                                                                                                                                                                                                                                                                                                                                                                                                                                                                                                                                                                                                                                                        | 1.768940 | 3.018432 | 2.834895 | 0.000000 |   |   |     |          |  |  |  |  |     |          |          |  |  |  |     |          |          |          |  |  |     |          |          |          |          |  |     |          |          |          |          |          |     |          |          |          |          |          |      |          |          |          |          |          |     |          |          |          |          |          |     |          |          |          |          |          |       |          |          |          |          |          |  |   |   |   |   |    |     |          |  |  |  |  |      |          |          |  |  |  |     |          |          |          |  |  |     |          |          |          |          |  |       |          |          |          |          |          |
| 6 B                                                                                                                                           | 2.825184                                                                                                                                                                                                                                                                                                                                                                                                                                                                                                                                                                                                                                                                                                                                                                                                                                                                                                                                                                                                                                                                                                                                                                                                                                                                                                                                                                                                                                                                                                                                                                                                                                                                                                                        | 1.850396 | 2.028468 | 2.933820 | 1.787845 |   |   |     |          |  |  |  |  |     |          |          |  |  |  |     |          |          |          |  |  |     |          |          |          |          |  |     |          |          |          |          |          |     |          |          |          |          |          |      |          |          |          |          |          |     |          |          |          |          |          |     |          |          |          |          |          |       |          |          |          |          |          |  |   |   |   |   |    |     |          |  |  |  |  |      |          |          |  |  |  |     |          |          |          |  |  |     |          |          |          |          |  |       |          |          |          |          |          |
| 7 B                                                                                                                                           | 2.825815                                                                                                                                                                                                                                                                                                                                                                                                                                                                                                                                                                                                                                                                                                                                                                                                                                                                                                                                                                                                                                                                                                                                                                                                                                                                                                                                                                                                                                                                                                                                                                                                                                                                                                                        | 2.933548 | 2.025987 | 1.850302 | 2.590280 |   |   |     |          |  |  |  |  |     |          |          |  |  |  |     |          |          |          |  |  |     |          |          |          |          |  |     |          |          |          |          |          |     |          |          |          |          |          |      |          |          |          |          |          |     |          |          |          |          |          |     |          |          |          |          |          |       |          |          |          |          |          |  |   |   |   |   |    |     |          |  |  |  |  |      |          |          |  |  |  |     |          |          |          |  |  |     |          |          |          |          |  |       |          |          |          |          |          |
| 8 B                                                                                                                                           | 1.813011                                                                                                                                                                                                                                                                                                                                                                                                                                                                                                                                                                                                                                                                                                                                                                                                                                                                                                                                                                                                                                                                                                                                                                                                                                                                                                                                                                                                                                                                                                                                                                                                                                                                                                                        | 2.836374 | 3.017914 | 1.767994 | 1.824434 |   |   |     |          |  |  |  |  |     |          |          |  |  |  |     |          |          |          |  |  |     |          |          |          |          |  |     |          |          |          |          |          |     |          |          |          |          |          |      |          |          |          |          |          |     |          |          |          |          |          |     |          |          |          |          |          |       |          |          |          |          |          |  |   |   |   |   |    |     |          |  |  |  |  |      |          |          |  |  |  |     |          |          |          |  |  |     |          |          |          |          |  |       |          |          |          |          |          |
| 9 C                                                                                                                                           | 2.778269                                                                                                                                                                                                                                                                                                                                                                                                                                                                                                                                                                                                                                                                                                                                                                                                                                                                                                                                                                                                                                                                                                                                                                                                                                                                                                                                                                                                                                                                                                                                                                                                                                                                                                                        | 2.792649 | 2.972920 | 2.791728 | 1.599322 |   |   |     |          |  |  |  |  |     |          |          |  |  |  |     |          |          |          |  |  |     |          |          |          |          |  |     |          |          |          |          |          |     |          |          |          |          |          |      |          |          |          |          |          |     |          |          |          |          |          |     |          |          |          |          |          |       |          |          |          |          |          |  |   |   |   |   |    |     |          |  |  |  |  |      |          |          |  |  |  |     |          |          |          |  |  |     |          |          |          |          |  |       |          |          |          |          |          |
| 10 Fe                                                                                                                                         | 2.042304                                                                                                                                                                                                                                                                                                                                                                                                                                                                                                                                                                                                                                                                                                                                                                                                                                                                                                                                                                                                                                                                                                                                                                                                                                                                                                                                                                                                                                                                                                                                                                                                                                                                                                                        | 2.112902 | 2.061828 | 2.109187 | 3.378535 |   |   |     |          |  |  |  |  |     |          |          |  |  |  |     |          |          |          |  |  |     |          |          |          |          |  |     |          |          |          |          |          |     |          |          |          |          |          |      |          |          |          |          |          |     |          |          |          |          |          |     |          |          |          |          |          |       |          |          |          |          |          |  |   |   |   |   |    |     |          |  |  |  |  |      |          |          |  |  |  |     |          |          |          |  |  |     |          |          |          |          |  |       |          |          |          |          |          |
|                                                                                                                                               | 6                                                                                                                                                                                                                                                                                                                                                                                                                                                                                                                                                                                                                                                                                                                                                                                                                                                                                                                                                                                                                                                                                                                                                                                                                                                                                                                                                                                                                                                                                                                                                                                                                                                                                                                               | 7        | 8        | 9        | 10       |   |   |     |          |  |  |  |  |     |          |          |  |  |  |     |          |          |          |  |  |     |          |          |          |          |  |     |          |          |          |          |          |     |          |          |          |          |          |      |          |          |          |          |          |     |          |          |          |          |          |     |          |          |          |          |          |       |          |          |          |          |          |  |   |   |   |   |    |     |          |  |  |  |  |      |          |          |  |  |  |     |          |          |          |  |  |     |          |          |          |          |  |       |          |          |          |          |          |
| 6 B                                                                                                                                           | 0.000000                                                                                                                                                                                                                                                                                                                                                                                                                                                                                                                                                                                                                                                                                                                                                                                                                                                                                                                                                                                                                                                                                                                                                                                                                                                                                                                                                                                                                                                                                                                                                                                                                                                                                                                        |          |          |          |          |   |   |     |          |  |  |  |  |     |          |          |  |  |  |     |          |          |          |  |  |     |          |          |          |          |  |     |          |          |          |          |          |     |          |          |          |          |          |      |          |          |          |          |          |     |          |          |          |          |          |     |          |          |          |          |          |       |          |          |          |          |          |  |   |   |   |   |    |     |          |  |  |  |  |      |          |          |  |  |  |     |          |          |          |  |  |     |          |          |          |          |  |       |          |          |          |          |          |
| 7 B                                                                                                                                           | 1.924455                                                                                                                                                                                                                                                                                                                                                                                                                                                                                                                                                                                                                                                                                                                                                                                                                                                                                                                                                                                                                                                                                                                                                                                                                                                                                                                                                                                                                                                                                                                                                                                                                                                                                                                        | 0.000000 |          |          |          |   |   |     |          |  |  |  |  |     |          |          |  |  |  |     |          |          |          |  |  |     |          |          |          |          |  |     |          |          |          |          |          |     |          |          |          |          |          |      |          |          |          |          |          |     |          |          |          |          |          |     |          |          |          |          |          |       |          |          |          |          |          |  |   |   |   |   |    |     |          |  |  |  |  |      |          |          |  |  |  |     |          |          |          |  |  |     |          |          |          |          |  |       |          |          |          |          |          |
| 8 B                                                                                                                                           | 2.590040                                                                                                                                                                                                                                                                                                                                                                                                                                                                                                                                                                                                                                                                                                                                                                                                                                                                                                                                                                                                                                                                                                                                                                                                                                                                                                                                                                                                                                                                                                                                                                                                                                                                                                                        | 1.788683 | 0.000000 |          |          |   |   |     |          |  |  |  |  |     |          |          |  |  |  |     |          |          |          |  |  |     |          |          |          |          |  |     |          |          |          |          |          |     |          |          |          |          |          |      |          |          |          |          |          |     |          |          |          |          |          |     |          |          |          |          |          |       |          |          |          |          |          |  |   |   |   |   |    |     |          |  |  |  |  |      |          |          |  |  |  |     |          |          |          |  |  |     |          |          |          |          |  |       |          |          |          |          |          |
| 9 C                                                                                                                                           | 1.586042                                                                                                                                                                                                                                                                                                                                                                                                                                                                                                                                                                                                                                                                                                                                                                                                                                                                                                                                                                                                                                                                                                                                                                                                                                                                                                                                                                                                                                                                                                                                                                                                                                                                                                                        | 1.586582 | 1.598878 | 0.000000 |          |   |   |     |          |  |  |  |  |     |          |          |  |  |  |     |          |          |          |  |  |     |          |          |          |          |  |     |          |          |          |          |          |     |          |          |          |          |          |      |          |          |          |          |          |     |          |          |          |          |          |     |          |          |          |          |          |       |          |          |          |          |          |  |   |   |   |   |    |     |          |  |  |  |  |      |          |          |  |  |  |     |          |          |          |  |  |     |          |          |          |          |  |       |          |          |          |          |          |
| 10 Fe                                                                                                                                         | 3.420646                                                                                                                                                                                                                                                                                                                                                                                                                                                                                                                                                                                                                                                                                                                                                                                                                                                                                                                                                                                                                                                                                                                                                                                                                                                                                                                                                                                                                                                                                                                                                                                                                                                                                                                        | 3.418174 | 3.377343 | 4.068785 | 0.000000 |   |   |     |          |  |  |  |  |     |          |          |  |  |  |     |          |          |          |  |  |     |          |          |          |          |  |     |          |          |          |          |          |     |          |          |          |          |          |      |          |          |          |          |          |     |          |          |          |          |          |     |          |          |          |          |          |       |          |          |          |          |          |  |   |   |   |   |    |     |          |  |  |  |  |      |          |          |  |  |  |     |          |          |          |  |  |     |          |          |          |          |  |       |          |          |          |          |          |

| 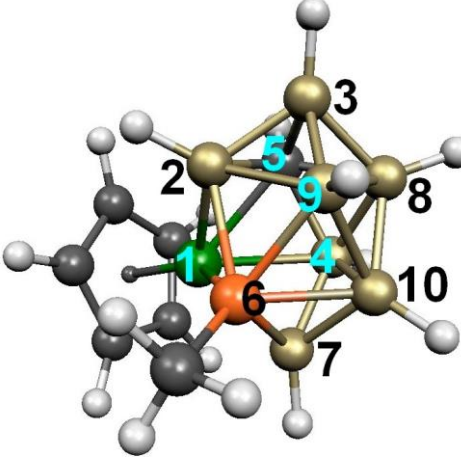 <p>11. -2055.13893840 +22.7<br/>C<sub>1</sub> H/L 2.33</p>  | <table border="1"> <thead> <tr> <th></th> <th>1</th> <th>2</th> <th>3</th> <th>4</th> <th>5</th> </tr> </thead> <tbody> <tr><td>1 Fe</td><td>0.000000</td><td></td><td></td><td></td><td></td></tr> <tr><td>2 B</td><td>2.090359</td><td>0.000000</td><td></td><td></td><td></td></tr> <tr><td>3 B</td><td>3.293782</td><td>1.688222</td><td>0.000000</td><td></td><td></td></tr> <tr><td>4 B</td><td>2.122540</td><td>2.802995</td><td>2.873545</td><td>0.000000</td><td></td></tr> <tr><td>5 C</td><td>2.069978</td><td>1.700890</td><td>1.625988</td><td>1.694772</td><td>0.000000</td></tr> <tr><td>6 P</td><td>2.191078</td><td>2.016016</td><td>3.064566</td><td>2.678975</td><td>2.841989</td></tr> <tr><td>7 B</td><td>2.040898</td><td>3.143975</td><td>3.833093</td><td>1.690842</td><td>2.905863</td></tr> <tr><td>8 B</td><td>3.253058</td><td>2.591671</td><td>1.680111</td><td>1.791910</td><td>1.726733</td></tr> <tr><td>9 B</td><td>3.308065</td><td>1.939285</td><td>1.676016</td><td>2.836861</td><td>2.466448</td></tr> <tr><td>10 B</td><td>3.056615</td><td>2.969782</td><td>2.931454</td><td>1.814607</td><td>2.706715</td></tr> <tr> <td></td> <td>6</td> <td>7</td> <td>8</td> <td>9</td> <td>10</td> </tr> <tr><td>6 P</td><td>0.000000</td><td></td><td></td><td></td><td></td></tr> <tr><td>7 B</td><td>1.900335</td><td>0.000000</td><td></td><td></td><td></td></tr> <tr><td>8 B</td><td>2.952334</td><td>2.951964</td><td>0.000000</td><td></td><td></td></tr> <tr><td>9 B</td><td>1.992449</td><td>3.102431</td><td>1.795351</td><td>0.000000</td><td></td></tr> <tr><td>10 B</td><td>2.019454</td><td>1.774148</td><td>1.754760</td><td>1.893069</td><td>0.000000</td></tr> </tbody> </table>  |          | 1        | 2        | 3        | 4 | 5 | 1 Fe | 0.000000 |  |  |  |  | 2 B | 2.090359 | 0.000000 |  |  |  | 3 B | 3.293782 | 1.688222 | 0.000000 |  |  | 4 B | 2.122540 | 2.802995 | 2.873545 | 0.000000 |  | 5 C | 2.069978 | 1.700890 | 1.625988 | 1.694772 | 0.000000 | 6 P | 2.191078 | 2.016016 | 3.064566 | 2.678975 | 2.841989 | 7 B | 2.040898 | 3.143975 | 3.833093 | 1.690842 | 2.905863 | 8 B | 3.253058 | 2.591671 | 1.680111 | 1.791910 | 1.726733 | 9 B | 3.308065 | 1.939285 | 1.676016 | 2.836861 | 2.466448 | 10 B  | 3.056615 | 2.969782 | 2.931454 | 1.814607 | 2.706715 |  | 6 | 7 | 8 | 9 | 10 | 6 P | 0.000000 |  |  |  |  | 7 B | 1.900335 | 0.000000 |  |  |  | 8 B | 2.952334 | 2.951964 | 0.000000 |  |  | 9 B | 1.992449 | 3.102431 | 1.795351 | 0.000000 |  | 10 B  | 2.019454 | 1.774148 | 1.754760 | 1.893069 | 0.000000 |
|-----------------------------------------------------------------------------------------------------------------------------------------------|---------------------------------------------------------------------------------------------------------------------------------------------------------------------------------------------------------------------------------------------------------------------------------------------------------------------------------------------------------------------------------------------------------------------------------------------------------------------------------------------------------------------------------------------------------------------------------------------------------------------------------------------------------------------------------------------------------------------------------------------------------------------------------------------------------------------------------------------------------------------------------------------------------------------------------------------------------------------------------------------------------------------------------------------------------------------------------------------------------------------------------------------------------------------------------------------------------------------------------------------------------------------------------------------------------------------------------------------------------------------------------------------------------------------------------------------------------------------------------------------------------------------------------------------------------------------------------------------------------------------------------------------------------------------------------------------------------------------------------|----------|----------|----------|----------|---|---|------|----------|--|--|--|--|-----|----------|----------|--|--|--|-----|----------|----------|----------|--|--|-----|----------|----------|----------|----------|--|-----|----------|----------|----------|----------|----------|-----|----------|----------|----------|----------|----------|-----|----------|----------|----------|----------|----------|-----|----------|----------|----------|----------|----------|-----|----------|----------|----------|----------|----------|-------|----------|----------|----------|----------|----------|--|---|---|---|---|----|-----|----------|--|--|--|--|-----|----------|----------|--|--|--|-----|----------|----------|----------|--|--|-----|----------|----------|----------|----------|--|-------|----------|----------|----------|----------|----------|
|                                                                                                                                               | 1                                                                                                                                                                                                                                                                                                                                                                                                                                                                                                                                                                                                                                                                                                                                                                                                                                                                                                                                                                                                                                                                                                                                                                                                                                                                                                                                                                                                                                                                                                                                                                                                                                                                                                                               | 2        | 3        | 4        | 5        |   |   |      |          |  |  |  |  |     |          |          |  |  |  |     |          |          |          |  |  |     |          |          |          |          |  |     |          |          |          |          |          |     |          |          |          |          |          |     |          |          |          |          |          |     |          |          |          |          |          |     |          |          |          |          |          |       |          |          |          |          |          |  |   |   |   |   |    |     |          |  |  |  |  |     |          |          |  |  |  |     |          |          |          |  |  |     |          |          |          |          |  |       |          |          |          |          |          |
| 1 Fe                                                                                                                                          | 0.000000                                                                                                                                                                                                                                                                                                                                                                                                                                                                                                                                                                                                                                                                                                                                                                                                                                                                                                                                                                                                                                                                                                                                                                                                                                                                                                                                                                                                                                                                                                                                                                                                                                                                                                                        |          |          |          |          |   |   |      |          |  |  |  |  |     |          |          |  |  |  |     |          |          |          |  |  |     |          |          |          |          |  |     |          |          |          |          |          |     |          |          |          |          |          |     |          |          |          |          |          |     |          |          |          |          |          |     |          |          |          |          |          |       |          |          |          |          |          |  |   |   |   |   |    |     |          |  |  |  |  |     |          |          |  |  |  |     |          |          |          |  |  |     |          |          |          |          |  |       |          |          |          |          |          |
| 2 B                                                                                                                                           | 2.090359                                                                                                                                                                                                                                                                                                                                                                                                                                                                                                                                                                                                                                                                                                                                                                                                                                                                                                                                                                                                                                                                                                                                                                                                                                                                                                                                                                                                                                                                                                                                                                                                                                                                                                                        | 0.000000 |          |          |          |   |   |      |          |  |  |  |  |     |          |          |  |  |  |     |          |          |          |  |  |     |          |          |          |          |  |     |          |          |          |          |          |     |          |          |          |          |          |     |          |          |          |          |          |     |          |          |          |          |          |     |          |          |          |          |          |       |          |          |          |          |          |  |   |   |   |   |    |     |          |  |  |  |  |     |          |          |  |  |  |     |          |          |          |  |  |     |          |          |          |          |  |       |          |          |          |          |          |
| 3 B                                                                                                                                           | 3.293782                                                                                                                                                                                                                                                                                                                                                                                                                                                                                                                                                                                                                                                                                                                                                                                                                                                                                                                                                                                                                                                                                                                                                                                                                                                                                                                                                                                                                                                                                                                                                                                                                                                                                                                        | 1.688222 | 0.000000 |          |          |   |   |      |          |  |  |  |  |     |          |          |  |  |  |     |          |          |          |  |  |     |          |          |          |          |  |     |          |          |          |          |          |     |          |          |          |          |          |     |          |          |          |          |          |     |          |          |          |          |          |     |          |          |          |          |          |       |          |          |          |          |          |  |   |   |   |   |    |     |          |  |  |  |  |     |          |          |  |  |  |     |          |          |          |  |  |     |          |          |          |          |  |       |          |          |          |          |          |
| 4 B                                                                                                                                           | 2.122540                                                                                                                                                                                                                                                                                                                                                                                                                                                                                                                                                                                                                                                                                                                                                                                                                                                                                                                                                                                                                                                                                                                                                                                                                                                                                                                                                                                                                                                                                                                                                                                                                                                                                                                        | 2.802995 | 2.873545 | 0.000000 |          |   |   |      |          |  |  |  |  |     |          |          |  |  |  |     |          |          |          |  |  |     |          |          |          |          |  |     |          |          |          |          |          |     |          |          |          |          |          |     |          |          |          |          |          |     |          |          |          |          |          |     |          |          |          |          |          |       |          |          |          |          |          |  |   |   |   |   |    |     |          |  |  |  |  |     |          |          |  |  |  |     |          |          |          |  |  |     |          |          |          |          |  |       |          |          |          |          |          |
| 5 C                                                                                                                                           | 2.069978                                                                                                                                                                                                                                                                                                                                                                                                                                                                                                                                                                                                                                                                                                                                                                                                                                                                                                                                                                                                                                                                                                                                                                                                                                                                                                                                                                                                                                                                                                                                                                                                                                                                                                                        | 1.700890 | 1.625988 | 1.694772 | 0.000000 |   |   |      |          |  |  |  |  |     |          |          |  |  |  |     |          |          |          |  |  |     |          |          |          |          |  |     |          |          |          |          |          |     |          |          |          |          |          |     |          |          |          |          |          |     |          |          |          |          |          |     |          |          |          |          |          |       |          |          |          |          |          |  |   |   |   |   |    |     |          |  |  |  |  |     |          |          |  |  |  |     |          |          |          |  |  |     |          |          |          |          |  |       |          |          |          |          |          |
| 6 P                                                                                                                                           | 2.191078                                                                                                                                                                                                                                                                                                                                                                                                                                                                                                                                                                                                                                                                                                                                                                                                                                                                                                                                                                                                                                                                                                                                                                                                                                                                                                                                                                                                                                                                                                                                                                                                                                                                                                                        | 2.016016 | 3.064566 | 2.678975 | 2.841989 |   |   |      |          |  |  |  |  |     |          |          |  |  |  |     |          |          |          |  |  |     |          |          |          |          |  |     |          |          |          |          |          |     |          |          |          |          |          |     |          |          |          |          |          |     |          |          |          |          |          |     |          |          |          |          |          |       |          |          |          |          |          |  |   |   |   |   |    |     |          |  |  |  |  |     |          |          |  |  |  |     |          |          |          |  |  |     |          |          |          |          |  |       |          |          |          |          |          |
| 7 B                                                                                                                                           | 2.040898                                                                                                                                                                                                                                                                                                                                                                                                                                                                                                                                                                                                                                                                                                                                                                                                                                                                                                                                                                                                                                                                                                                                                                                                                                                                                                                                                                                                                                                                                                                                                                                                                                                                                                                        | 3.143975 | 3.833093 | 1.690842 | 2.905863 |   |   |      |          |  |  |  |  |     |          |          |  |  |  |     |          |          |          |  |  |     |          |          |          |          |  |     |          |          |          |          |          |     |          |          |          |          |          |     |          |          |          |          |          |     |          |          |          |          |          |     |          |          |          |          |          |       |          |          |          |          |          |  |   |   |   |   |    |     |          |  |  |  |  |     |          |          |  |  |  |     |          |          |          |  |  |     |          |          |          |          |  |       |          |          |          |          |          |
| 8 B                                                                                                                                           | 3.253058                                                                                                                                                                                                                                                                                                                                                                                                                                                                                                                                                                                                                                                                                                                                                                                                                                                                                                                                                                                                                                                                                                                                                                                                                                                                                                                                                                                                                                                                                                                                                                                                                                                                                                                        | 2.591671 | 1.680111 | 1.791910 | 1.726733 |   |   |      |          |  |  |  |  |     |          |          |  |  |  |     |          |          |          |  |  |     |          |          |          |          |  |     |          |          |          |          |          |     |          |          |          |          |          |     |          |          |          |          |          |     |          |          |          |          |          |     |          |          |          |          |          |       |          |          |          |          |          |  |   |   |   |   |    |     |          |  |  |  |  |     |          |          |  |  |  |     |          |          |          |  |  |     |          |          |          |          |  |       |          |          |          |          |          |
| 9 B                                                                                                                                           | 3.308065                                                                                                                                                                                                                                                                                                                                                                                                                                                                                                                                                                                                                                                                                                                                                                                                                                                                                                                                                                                                                                                                                                                                                                                                                                                                                                                                                                                                                                                                                                                                                                                                                                                                                                                        | 1.939285 | 1.676016 | 2.836861 | 2.466448 |   |   |      |          |  |  |  |  |     |          |          |  |  |  |     |          |          |          |  |  |     |          |          |          |          |  |     |          |          |          |          |          |     |          |          |          |          |          |     |          |          |          |          |          |     |          |          |          |          |          |     |          |          |          |          |          |       |          |          |          |          |          |  |   |   |   |   |    |     |          |  |  |  |  |     |          |          |  |  |  |     |          |          |          |  |  |     |          |          |          |          |  |       |          |          |          |          |          |
| 10 B                                                                                                                                          | 3.056615                                                                                                                                                                                                                                                                                                                                                                                                                                                                                                                                                                                                                                                                                                                                                                                                                                                                                                                                                                                                                                                                                                                                                                                                                                                                                                                                                                                                                                                                                                                                                                                                                                                                                                                        | 2.969782 | 2.931454 | 1.814607 | 2.706715 |   |   |      |          |  |  |  |  |     |          |          |  |  |  |     |          |          |          |  |  |     |          |          |          |          |  |     |          |          |          |          |          |     |          |          |          |          |          |     |          |          |          |          |          |     |          |          |          |          |          |     |          |          |          |          |          |       |          |          |          |          |          |  |   |   |   |   |    |     |          |  |  |  |  |     |          |          |  |  |  |     |          |          |          |  |  |     |          |          |          |          |  |       |          |          |          |          |          |
|                                                                                                                                               | 6                                                                                                                                                                                                                                                                                                                                                                                                                                                                                                                                                                                                                                                                                                                                                                                                                                                                                                                                                                                                                                                                                                                                                                                                                                                                                                                                                                                                                                                                                                                                                                                                                                                                                                                               | 7        | 8        | 9        | 10       |   |   |      |          |  |  |  |  |     |          |          |  |  |  |     |          |          |          |  |  |     |          |          |          |          |  |     |          |          |          |          |          |     |          |          |          |          |          |     |          |          |          |          |          |     |          |          |          |          |          |     |          |          |          |          |          |       |          |          |          |          |          |  |   |   |   |   |    |     |          |  |  |  |  |     |          |          |  |  |  |     |          |          |          |  |  |     |          |          |          |          |  |       |          |          |          |          |          |
| 6 P                                                                                                                                           | 0.000000                                                                                                                                                                                                                                                                                                                                                                                                                                                                                                                                                                                                                                                                                                                                                                                                                                                                                                                                                                                                                                                                                                                                                                                                                                                                                                                                                                                                                                                                                                                                                                                                                                                                                                                        |          |          |          |          |   |   |      |          |  |  |  |  |     |          |          |  |  |  |     |          |          |          |  |  |     |          |          |          |          |  |     |          |          |          |          |          |     |          |          |          |          |          |     |          |          |          |          |          |     |          |          |          |          |          |     |          |          |          |          |          |       |          |          |          |          |          |  |   |   |   |   |    |     |          |  |  |  |  |     |          |          |  |  |  |     |          |          |          |  |  |     |          |          |          |          |  |       |          |          |          |          |          |
| 7 B                                                                                                                                           | 1.900335                                                                                                                                                                                                                                                                                                                                                                                                                                                                                                                                                                                                                                                                                                                                                                                                                                                                                                                                                                                                                                                                                                                                                                                                                                                                                                                                                                                                                                                                                                                                                                                                                                                                                                                        | 0.000000 |          |          |          |   |   |      |          |  |  |  |  |     |          |          |  |  |  |     |          |          |          |  |  |     |          |          |          |          |  |     |          |          |          |          |          |     |          |          |          |          |          |     |          |          |          |          |          |     |          |          |          |          |          |     |          |          |          |          |          |       |          |          |          |          |          |  |   |   |   |   |    |     |          |  |  |  |  |     |          |          |  |  |  |     |          |          |          |  |  |     |          |          |          |          |  |       |          |          |          |          |          |
| 8 B                                                                                                                                           | 2.952334                                                                                                                                                                                                                                                                                                                                                                                                                                                                                                                                                                                                                                                                                                                                                                                                                                                                                                                                                                                                                                                                                                                                                                                                                                                                                                                                                                                                                                                                                                                                                                                                                                                                                                                        | 2.951964 | 0.000000 |          |          |   |   |      |          |  |  |  |  |     |          |          |  |  |  |     |          |          |          |  |  |     |          |          |          |          |  |     |          |          |          |          |          |     |          |          |          |          |          |     |          |          |          |          |          |     |          |          |          |          |          |     |          |          |          |          |          |       |          |          |          |          |          |  |   |   |   |   |    |     |          |  |  |  |  |     |          |          |  |  |  |     |          |          |          |  |  |     |          |          |          |          |  |       |          |          |          |          |          |
| 9 B                                                                                                                                           | 1.992449                                                                                                                                                                                                                                                                                                                                                                                                                                                                                                                                                                                                                                                                                                                                                                                                                                                                                                                                                                                                                                                                                                                                                                                                                                                                                                                                                                                                                                                                                                                                                                                                                                                                                                                        | 3.102431 | 1.795351 | 0.000000 |          |   |   |      |          |  |  |  |  |     |          |          |  |  |  |     |          |          |          |  |  |     |          |          |          |          |  |     |          |          |          |          |          |     |          |          |          |          |          |     |          |          |          |          |          |     |          |          |          |          |          |     |          |          |          |          |          |       |          |          |          |          |          |  |   |   |   |   |    |     |          |  |  |  |  |     |          |          |  |  |  |     |          |          |          |  |  |     |          |          |          |          |  |       |          |          |          |          |          |
| 10 B                                                                                                                                          | 2.019454                                                                                                                                                                                                                                                                                                                                                                                                                                                                                                                                                                                                                                                                                                                                                                                                                                                                                                                                                                                                                                                                                                                                                                                                                                                                                                                                                                                                                                                                                                                                                                                                                                                                                                                        | 1.774148 | 1.754760 | 1.893069 | 0.000000 |   |   |      |          |  |  |  |  |     |          |          |  |  |  |     |          |          |          |  |  |     |          |          |          |          |  |     |          |          |          |          |          |     |          |          |          |          |          |     |          |          |          |          |          |     |          |          |          |          |          |     |          |          |          |          |          |       |          |          |          |          |          |  |   |   |   |   |    |     |          |  |  |  |  |     |          |          |  |  |  |     |          |          |          |  |  |     |          |          |          |          |  |       |          |          |          |          |          |
|  <p>12. -2055.13824110 +23.1<br/>C<sub>1</sub> H/L 2.44</p> | <table border="1"> <thead> <tr> <th></th> <th>1</th> <th>2</th> <th>3</th> <th>4</th> <th>5</th> </tr> </thead> <tbody> <tr><td>1 B</td><td>0.000000</td><td></td><td></td><td></td><td></td></tr> <tr><td>2 B</td><td>3.154664</td><td>0.000000</td><td></td><td></td><td></td></tr> <tr><td>3 B</td><td>3.081050</td><td>1.940935</td><td>0.000000</td><td></td><td></td></tr> <tr><td>4 C</td><td>1.600680</td><td>2.756221</td><td>2.716713</td><td>0.000000</td><td></td></tr> <tr><td>5 B</td><td>2.921276</td><td>2.611244</td><td>1.799742</td><td>1.719121</td><td>0.000000</td></tr> <tr><td>6 B</td><td>2.931727</td><td>1.809141</td><td>2.600409</td><td>1.712829</td><td>1.822028</td></tr> <tr><td>7 P</td><td>1.924338</td><td>2.005419</td><td>1.986044</td><td>2.581251</td><td>2.960826</td></tr> <tr><td>8 B</td><td>3.804144</td><td>1.689331</td><td>1.692176</td><td>2.795405</td><td>1.677770</td></tr> <tr><td>9 B</td><td>1.769871</td><td>2.960736</td><td>1.848033</td><td>1.720824</td><td>1.753793</td></tr> <tr><td>10 Fe</td><td>1.992149</td><td>2.147702</td><td>3.312756</td><td>2.094178</td><td>3.258031</td></tr> <tr> <td></td> <td>6</td> <td>7</td> <td>8</td> <td>9</td> <td>10</td> </tr> <tr><td>6 B</td><td>0.000000</td><td></td><td></td><td></td><td></td></tr> <tr><td>7 P</td><td>2.936836</td><td>0.000000</td><td></td><td></td><td></td></tr> <tr><td>8 B</td><td>1.707005</td><td>3.058742</td><td>0.000000</td><td></td><td></td></tr> <tr><td>9 B</td><td>2.807581</td><td>2.010808</td><td>2.909771</td><td>0.000000</td><td></td></tr> <tr><td>10 Fe</td><td>2.096234</td><td>2.171978</td><td>3.312216</td><td>3.035180</td><td>0.000000</td></tr> </tbody> </table> |          | 1        | 2        | 3        | 4 | 5 | 1 B  | 0.000000 |  |  |  |  | 2 B | 3.154664 | 0.000000 |  |  |  | 3 B | 3.081050 | 1.940935 | 0.000000 |  |  | 4 C | 1.600680 | 2.756221 | 2.716713 | 0.000000 |  | 5 B | 2.921276 | 2.611244 | 1.799742 | 1.719121 | 0.000000 | 6 B | 2.931727 | 1.809141 | 2.600409 | 1.712829 | 1.822028 | 7 P | 1.924338 | 2.005419 | 1.986044 | 2.581251 | 2.960826 | 8 B | 3.804144 | 1.689331 | 1.692176 | 2.795405 | 1.677770 | 9 B | 1.769871 | 2.960736 | 1.848033 | 1.720824 | 1.753793 | 10 Fe | 1.992149 | 2.147702 | 3.312756 | 2.094178 | 3.258031 |  | 6 | 7 | 8 | 9 | 10 | 6 B | 0.000000 |  |  |  |  | 7 P | 2.936836 | 0.000000 |  |  |  | 8 B | 1.707005 | 3.058742 | 0.000000 |  |  | 9 B | 2.807581 | 2.010808 | 2.909771 | 0.000000 |  | 10 Fe | 2.096234 | 2.171978 | 3.312216 | 3.035180 | 0.000000 |
|                                                                                                                                               | 1                                                                                                                                                                                                                                                                                                                                                                                                                                                                                                                                                                                                                                                                                                                                                                                                                                                                                                                                                                                                                                                                                                                                                                                                                                                                                                                                                                                                                                                                                                                                                                                                                                                                                                                               | 2        | 3        | 4        | 5        |   |   |      |          |  |  |  |  |     |          |          |  |  |  |     |          |          |          |  |  |     |          |          |          |          |  |     |          |          |          |          |          |     |          |          |          |          |          |     |          |          |          |          |          |     |          |          |          |          |          |     |          |          |          |          |          |       |          |          |          |          |          |  |   |   |   |   |    |     |          |  |  |  |  |     |          |          |  |  |  |     |          |          |          |  |  |     |          |          |          |          |  |       |          |          |          |          |          |
| 1 B                                                                                                                                           | 0.000000                                                                                                                                                                                                                                                                                                                                                                                                                                                                                                                                                                                                                                                                                                                                                                                                                                                                                                                                                                                                                                                                                                                                                                                                                                                                                                                                                                                                                                                                                                                                                                                                                                                                                                                        |          |          |          |          |   |   |      |          |  |  |  |  |     |          |          |  |  |  |     |          |          |          |  |  |     |          |          |          |          |  |     |          |          |          |          |          |     |          |          |          |          |          |     |          |          |          |          |          |     |          |          |          |          |          |     |          |          |          |          |          |       |          |          |          |          |          |  |   |   |   |   |    |     |          |  |  |  |  |     |          |          |  |  |  |     |          |          |          |  |  |     |          |          |          |          |  |       |          |          |          |          |          |
| 2 B                                                                                                                                           | 3.154664                                                                                                                                                                                                                                                                                                                                                                                                                                                                                                                                                                                                                                                                                                                                                                                                                                                                                                                                                                                                                                                                                                                                                                                                                                                                                                                                                                                                                                                                                                                                                                                                                                                                                                                        | 0.000000 |          |          |          |   |   |      |          |  |  |  |  |     |          |          |  |  |  |     |          |          |          |  |  |     |          |          |          |          |  |     |          |          |          |          |          |     |          |          |          |          |          |     |          |          |          |          |          |     |          |          |          |          |          |     |          |          |          |          |          |       |          |          |          |          |          |  |   |   |   |   |    |     |          |  |  |  |  |     |          |          |  |  |  |     |          |          |          |  |  |     |          |          |          |          |  |       |          |          |          |          |          |
| 3 B                                                                                                                                           | 3.081050                                                                                                                                                                                                                                                                                                                                                                                                                                                                                                                                                                                                                                                                                                                                                                                                                                                                                                                                                                                                                                                                                                                                                                                                                                                                                                                                                                                                                                                                                                                                                                                                                                                                                                                        | 1.940935 | 0.000000 |          |          |   |   |      |          |  |  |  |  |     |          |          |  |  |  |     |          |          |          |  |  |     |          |          |          |          |  |     |          |          |          |          |          |     |          |          |          |          |          |     |          |          |          |          |          |     |          |          |          |          |          |     |          |          |          |          |          |       |          |          |          |          |          |  |   |   |   |   |    |     |          |  |  |  |  |     |          |          |  |  |  |     |          |          |          |  |  |     |          |          |          |          |  |       |          |          |          |          |          |
| 4 C                                                                                                                                           | 1.600680                                                                                                                                                                                                                                                                                                                                                                                                                                                                                                                                                                                                                                                                                                                                                                                                                                                                                                                                                                                                                                                                                                                                                                                                                                                                                                                                                                                                                                                                                                                                                                                                                                                                                                                        | 2.756221 | 2.716713 | 0.000000 |          |   |   |      |          |  |  |  |  |     |          |          |  |  |  |     |          |          |          |  |  |     |          |          |          |          |  |     |          |          |          |          |          |     |          |          |          |          |          |     |          |          |          |          |          |     |          |          |          |          |          |     |          |          |          |          |          |       |          |          |          |          |          |  |   |   |   |   |    |     |          |  |  |  |  |     |          |          |  |  |  |     |          |          |          |  |  |     |          |          |          |          |  |       |          |          |          |          |          |
| 5 B                                                                                                                                           | 2.921276                                                                                                                                                                                                                                                                                                                                                                                                                                                                                                                                                                                                                                                                                                                                                                                                                                                                                                                                                                                                                                                                                                                                                                                                                                                                                                                                                                                                                                                                                                                                                                                                                                                                                                                        | 2.611244 | 1.799742 | 1.719121 | 0.000000 |   |   |      |          |  |  |  |  |     |          |          |  |  |  |     |          |          |          |  |  |     |          |          |          |          |  |     |          |          |          |          |          |     |          |          |          |          |          |     |          |          |          |          |          |     |          |          |          |          |          |     |          |          |          |          |          |       |          |          |          |          |          |  |   |   |   |   |    |     |          |  |  |  |  |     |          |          |  |  |  |     |          |          |          |  |  |     |          |          |          |          |  |       |          |          |          |          |          |
| 6 B                                                                                                                                           | 2.931727                                                                                                                                                                                                                                                                                                                                                                                                                                                                                                                                                                                                                                                                                                                                                                                                                                                                                                                                                                                                                                                                                                                                                                                                                                                                                                                                                                                                                                                                                                                                                                                                                                                                                                                        | 1.809141 | 2.600409 | 1.712829 | 1.822028 |   |   |      |          |  |  |  |  |     |          |          |  |  |  |     |          |          |          |  |  |     |          |          |          |          |  |     |          |          |          |          |          |     |          |          |          |          |          |     |          |          |          |          |          |     |          |          |          |          |          |     |          |          |          |          |          |       |          |          |          |          |          |  |   |   |   |   |    |     |          |  |  |  |  |     |          |          |  |  |  |     |          |          |          |  |  |     |          |          |          |          |  |       |          |          |          |          |          |
| 7 P                                                                                                                                           | 1.924338                                                                                                                                                                                                                                                                                                                                                                                                                                                                                                                                                                                                                                                                                                                                                                                                                                                                                                                                                                                                                                                                                                                                                                                                                                                                                                                                                                                                                                                                                                                                                                                                                                                                                                                        | 2.005419 | 1.986044 | 2.581251 | 2.960826 |   |   |      |          |  |  |  |  |     |          |          |  |  |  |     |          |          |          |  |  |     |          |          |          |          |  |     |          |          |          |          |          |     |          |          |          |          |          |     |          |          |          |          |          |     |          |          |          |          |          |     |          |          |          |          |          |       |          |          |          |          |          |  |   |   |   |   |    |     |          |  |  |  |  |     |          |          |  |  |  |     |          |          |          |  |  |     |          |          |          |          |  |       |          |          |          |          |          |
| 8 B                                                                                                                                           | 3.804144                                                                                                                                                                                                                                                                                                                                                                                                                                                                                                                                                                                                                                                                                                                                                                                                                                                                                                                                                                                                                                                                                                                                                                                                                                                                                                                                                                                                                                                                                                                                                                                                                                                                                                                        | 1.689331 | 1.692176 | 2.795405 | 1.677770 |   |   |      |          |  |  |  |  |     |          |          |  |  |  |     |          |          |          |  |  |     |          |          |          |          |  |     |          |          |          |          |          |     |          |          |          |          |          |     |          |          |          |          |          |     |          |          |          |          |          |     |          |          |          |          |          |       |          |          |          |          |          |  |   |   |   |   |    |     |          |  |  |  |  |     |          |          |  |  |  |     |          |          |          |  |  |     |          |          |          |          |  |       |          |          |          |          |          |
| 9 B                                                                                                                                           | 1.769871                                                                                                                                                                                                                                                                                                                                                                                                                                                                                                                                                                                                                                                                                                                                                                                                                                                                                                                                                                                                                                                                                                                                                                                                                                                                                                                                                                                                                                                                                                                                                                                                                                                                                                                        | 2.960736 | 1.848033 | 1.720824 | 1.753793 |   |   |      |          |  |  |  |  |     |          |          |  |  |  |     |          |          |          |  |  |     |          |          |          |          |  |     |          |          |          |          |          |     |          |          |          |          |          |     |          |          |          |          |          |     |          |          |          |          |          |     |          |          |          |          |          |       |          |          |          |          |          |  |   |   |   |   |    |     |          |  |  |  |  |     |          |          |  |  |  |     |          |          |          |  |  |     |          |          |          |          |  |       |          |          |          |          |          |
| 10 Fe                                                                                                                                         | 1.992149                                                                                                                                                                                                                                                                                                                                                                                                                                                                                                                                                                                                                                                                                                                                                                                                                                                                                                                                                                                                                                                                                                                                                                                                                                                                                                                                                                                                                                                                                                                                                                                                                                                                                                                        | 2.147702 | 3.312756 | 2.094178 | 3.258031 |   |   |      |          |  |  |  |  |     |          |          |  |  |  |     |          |          |          |  |  |     |          |          |          |          |  |     |          |          |          |          |          |     |          |          |          |          |          |     |          |          |          |          |          |     |          |          |          |          |          |     |          |          |          |          |          |       |          |          |          |          |          |  |   |   |   |   |    |     |          |  |  |  |  |     |          |          |  |  |  |     |          |          |          |  |  |     |          |          |          |          |  |       |          |          |          |          |          |
|                                                                                                                                               | 6                                                                                                                                                                                                                                                                                                                                                                                                                                                                                                                                                                                                                                                                                                                                                                                                                                                                                                                                                                                                                                                                                                                                                                                                                                                                                                                                                                                                                                                                                                                                                                                                                                                                                                                               | 7        | 8        | 9        | 10       |   |   |      |          |  |  |  |  |     |          |          |  |  |  |     |          |          |          |  |  |     |          |          |          |          |  |     |          |          |          |          |          |     |          |          |          |          |          |     |          |          |          |          |          |     |          |          |          |          |          |     |          |          |          |          |          |       |          |          |          |          |          |  |   |   |   |   |    |     |          |  |  |  |  |     |          |          |  |  |  |     |          |          |          |  |  |     |          |          |          |          |  |       |          |          |          |          |          |
| 6 B                                                                                                                                           | 0.000000                                                                                                                                                                                                                                                                                                                                                                                                                                                                                                                                                                                                                                                                                                                                                                                                                                                                                                                                                                                                                                                                                                                                                                                                                                                                                                                                                                                                                                                                                                                                                                                                                                                                                                                        |          |          |          |          |   |   |      |          |  |  |  |  |     |          |          |  |  |  |     |          |          |          |  |  |     |          |          |          |          |  |     |          |          |          |          |          |     |          |          |          |          |          |     |          |          |          |          |          |     |          |          |          |          |          |     |          |          |          |          |          |       |          |          |          |          |          |  |   |   |   |   |    |     |          |  |  |  |  |     |          |          |  |  |  |     |          |          |          |  |  |     |          |          |          |          |  |       |          |          |          |          |          |
| 7 P                                                                                                                                           | 2.936836                                                                                                                                                                                                                                                                                                                                                                                                                                                                                                                                                                                                                                                                                                                                                                                                                                                                                                                                                                                                                                                                                                                                                                                                                                                                                                                                                                                                                                                                                                                                                                                                                                                                                                                        | 0.000000 |          |          |          |   |   |      |          |  |  |  |  |     |          |          |  |  |  |     |          |          |          |  |  |     |          |          |          |          |  |     |          |          |          |          |          |     |          |          |          |          |          |     |          |          |          |          |          |     |          |          |          |          |          |     |          |          |          |          |          |       |          |          |          |          |          |  |   |   |   |   |    |     |          |  |  |  |  |     |          |          |  |  |  |     |          |          |          |  |  |     |          |          |          |          |  |       |          |          |          |          |          |
| 8 B                                                                                                                                           | 1.707005                                                                                                                                                                                                                                                                                                                                                                                                                                                                                                                                                                                                                                                                                                                                                                                                                                                                                                                                                                                                                                                                                                                                                                                                                                                                                                                                                                                                                                                                                                                                                                                                                                                                                                                        | 3.058742 | 0.000000 |          |          |   |   |      |          |  |  |  |  |     |          |          |  |  |  |     |          |          |          |  |  |     |          |          |          |          |  |     |          |          |          |          |          |     |          |          |          |          |          |     |          |          |          |          |          |     |          |          |          |          |          |     |          |          |          |          |          |       |          |          |          |          |          |  |   |   |   |   |    |     |          |  |  |  |  |     |          |          |  |  |  |     |          |          |          |  |  |     |          |          |          |          |  |       |          |          |          |          |          |
| 9 B                                                                                                                                           | 2.807581                                                                                                                                                                                                                                                                                                                                                                                                                                                                                                                                                                                                                                                                                                                                                                                                                                                                                                                                                                                                                                                                                                                                                                                                                                                                                                                                                                                                                                                                                                                                                                                                                                                                                                                        | 2.010808 | 2.909771 | 0.000000 |          |   |   |      |          |  |  |  |  |     |          |          |  |  |  |     |          |          |          |  |  |     |          |          |          |          |  |     |          |          |          |          |          |     |          |          |          |          |          |     |          |          |          |          |          |     |          |          |          |          |          |     |          |          |          |          |          |       |          |          |          |          |          |  |   |   |   |   |    |     |          |  |  |  |  |     |          |          |  |  |  |     |          |          |          |  |  |     |          |          |          |          |  |       |          |          |          |          |          |
| 10 Fe                                                                                                                                         | 2.096234                                                                                                                                                                                                                                                                                                                                                                                                                                                                                                                                                                                                                                                                                                                                                                                                                                                                                                                                                                                                                                                                                                                                                                                                                                                                                                                                                                                                                                                                                                                                                                                                                                                                                                                        | 2.171978 | 3.312216 | 3.035180 | 0.000000 |   |   |      |          |  |  |  |  |     |          |          |  |  |  |     |          |          |          |  |  |     |          |          |          |          |  |     |          |          |          |          |          |     |          |          |          |          |          |     |          |          |          |          |          |     |          |          |          |          |          |     |          |          |          |          |          |       |          |          |          |          |          |  |   |   |   |   |    |     |          |  |  |  |  |     |          |          |  |  |  |     |          |          |          |  |  |     |          |          |          |          |  |       |          |          |          |          |          |

Table S3C. Energy ranking for all of the CpFeCHPHB<sub>7</sub>H<sub>7</sub> optimized structures:

| No | Initial structure            | Final energy (a.u.) | ΔE (kcal/mol) |
|----|------------------------------|---------------------|---------------|
| 1  | 04a-BicapSqAntipr-Fe2C4P2    | -2015.87275530      | 0.00          |
| 2  | 02b-TetrTriPri2-Fe1P2C7      | -2015.87273300      | 0.01          |
| 3  | 02b-TetrTriPri2-Fe1P1C3      | -2015.87270590      | 0.03          |
| 4  | 01a-TetrTriPri1-Fe1C2P4      | -2015.87270340      | 0.03          |
| 5  | 02a-TetrTriPri2-Fe2C3P1      | -2015.87267860      | 0.05          |
| 6  | 02a-TetrTriPri2-Fe3C3P4      | -2015.87267780      | 0.05          |
| 7  | 05b-Isocloso-Fe3P4C2         | -2015.87267580      | 0.05          |
| 8  | 02b-TetrTriPri2-Fe1P4C4      | -2015.87267270      | 0.05          |
| 9  | 05b-Isocloso-Fe3P2C7         | -2015.87267240      | 0.05          |
| 10 | 02b-TetrTriPri2-Fe2P2C6      | -2015.87267190      | 0.05          |
| 11 | 05a-Isocloso-Fe3C3P6         | -2015.87266910      | 0.05          |
| 12 | 02a-TetrTriPri2-Fe3C2P5      | -2015.87266270      | 0.06          |
| 13 | 02a-TetrTriPri2-Fe2C1P5      | -2015.87264040      | 0.07          |
| 14 | 03a-BicapCub-Fe2C1P5         | -2015.87263780      | 0.07          |
| 15 | 02b-TetrTriPri2-Fe1P3C4      | -2015.87263140      | 0.08          |
| 16 | 02b-TetrTriPri2-Fe2P4C2      | -2015.87089920      | 1.16          |
| 17 | 01b-TetrTriPri1-Fe1P1C4      | -2015.86889960      | 2.42          |
| 18 | 05a-Isocloso-Fe2C1P4_r-22    | -2015.86888880      | 2.43          |
| 19 | 04b-BicapSqAntipr-Fe1P1C1    | -2015.86887880      | 2.43          |
| 20 | 01b-TetrTriPri1-Fe3P3C4_i-14 | -2015.86885550      | 2.45          |
| 21 | 05a-Isocloso-Fe3C1P3         | -2015.86885380      | 2.45          |
| 22 | 01b-TetrTriPri1-Fe1P2C7      | -2015.86885320      | 2.45          |
| 23 | 01b-TetrTriPri1-Fe2P1C5      | -2015.86884380      | 2.45          |
| 24 | 01b-TetrTriPri1-Fe3P2C6      | -2015.86884360      | 2.45          |
| 25 | 05b-Isocloso-Fe3P3C4         | -2015.86884170      | 2.46          |
| 26 | 02a-TetrTriPri2-Fe2C1P4      | -2015.86883320      | 2.46          |
| 27 | 01b-TetrTriPri1-Fe2P3C4      | -2015.86883020      | 2.46          |
| 28 | 02a-TetrTriPri2-Fe2C2P5      | -2015.86882450      | 2.47          |
| 29 | 02a-TetrTriPri2-Fe1C1P6      | -2015.86881640      | 2.47          |
| 30 | 03a-BicapCub-Fe1C1P1         | -2015.86881560      | 2.47          |
| 31 | 04a-BicapSqAntipr-Fe1C1P1    | -2015.86881540      | 2.47          |
| 32 | 02b-TetrTriPri2-Fe1P1C6      | -2015.86880210      | 2.48          |
| 33 | 05a-Isocloso-Fe2C1P6         | -2015.86879200      | 2.49          |
| 34 | 02b-TetrTriPri2-Fe2P2C1      | -2015.86877230      | 2.50          |
| 35 | 02a-TetrTriPri2-Fe1C2P3      | -2015.86876840      | 2.50          |
| 36 | 02b-TetrTriPri2-Fe1P3C3      | -2015.86876450      | 2.50          |
| 37 | 01b-TetrTriPri1-Fe3P3C4_r-14 | -2015.86875490      | 2.51          |
| 38 | 03b-BicapCub-Fe2P1C6         | -2015.86874960      | 2.51          |
| 39 | 01b-TetrTriPri1-Fe2P1C6      | -2015.86874700      | 2.52          |

|    |                               |                |       |
|----|-------------------------------|----------------|-------|
| 40 | 05b-Isocloso-Fe2P1C6          | -2015.86873780 | 2.52  |
| 41 | 03b-BicapCub-Fe1P1C2_i-18     | -2015.86873230 | 2.52  |
| 42 | 03b-BicapCub-Fe1P1C1          | -2015.86871970 | 2.53  |
| 43 | 05a-Isocloso-Fe2C1P4_i-22     | -2015.86871440 | 2.54  |
| 44 | 03b-BicapCub-Fe1P1C2_r-18     | -2015.86869360 | 2.55  |
| 45 | 01a-TetrcTriPri1-Fe1C1P6      | -2015.86862680 | 2.59  |
| 46 | 03b-BicapCub-Fe2P4C1          | -2015.86755580 | 3.26  |
| 47 | 01a-TetrcTriPri1-Fe3C4P4      | -2015.86754540 | 3.27  |
| 48 | 04b-BicapSqAntipr-Fe2P1C5     | -2015.86753730 | 3.27  |
| 49 | 02b-TetrcTriPri2-Fe3P2C6      | -2015.86753610 | 3.28  |
| 50 | 02a-TetrcTriPri2-Fe3C4P4      | -2015.86753330 | 3.28  |
| 51 | 02b-TetrcTriPri2-Fe1P1C8      | -2015.86753150 | 3.28  |
| 52 | 02a-TetrcTriPri2-Fe2C3P2      | -2015.86751940 | 3.29  |
| 53 | 05b-Isocloso-Fe3P2C2          | -2015.86751460 | 3.29  |
| 54 | 01b-TetrcTriPri1-Fe2P4C5      | -2015.86751080 | 3.29  |
| 55 | 01b-TetrcTriPri1-Fe3P4C5      | -2015.86751040 | 3.29  |
| 56 | 01b-TetrcTriPri1-Fe2P3C6      | -2015.86750850 | 3.29  |
| 57 | 02a-TetrcTriPri2-Fe3C2P6      | -2015.86750210 | 3.30  |
| 58 | 01a-TetrcTriPri1-Fe2C7P2      | -2015.86749670 | 3.30  |
| 59 | 02b-TetrcTriPri2-Fe1P3C2      | -2015.86748350 | 3.31  |
| 60 | 04b-BicapSqAntipr-Fe2P1C7     | -2015.86746770 | 3.32  |
| 61 | 02a-TetrcTriPri2-Fe3C3P6      | -2015.86746300 | 3.32  |
| 62 | 01b-TetrcTriPri1-Fe3P7C1      | -2015.86745680 | 3.32  |
| 63 | 02b-TetrcTriPri2-Fe1P8C1      | -2015.86745420 | 3.33  |
| 64 | 01b-TetrcTriPri1-Fe1P4C4      | -2015.86744780 | 3.33  |
| 65 | 05a-Isocloso-Fe3C1P8          | -2015.86744090 | 3.33  |
| 66 | 02b-TetrcTriPri2-Fe3P1C1      | -2015.86743920 | 3.34  |
| 67 | 02a-TetrcTriPri2-Fe2C2P4      | -2015.86742420 | 3.35  |
| 68 | 05b-Isocloso-Fe2P2C2          | -2015.86741620 | 3.35  |
| 69 | 02b-TetrcTriPri2-Fe3P2C5_r-30 | -2015.85037030 | 14.05 |
| 70 | 05b-Isocloso-Fe3P3C6          | -2015.85034110 | 14.07 |
| 71 | 02a-TetrcTriPri2-Fe1C4P4      | -2015.85033460 | 14.07 |
| 72 | 02b-TetrcTriPri2-Fe2P1C5      | -2015.85033260 | 14.07 |
| 73 | 05a-Isocloso-Fe3C4P2          | -2015.85032590 | 14.07 |
| 74 | 03b-BicapCub-Fe2P1C5          | -2015.85031870 | 14.08 |
| 75 | 02a-TetrcTriPri2-Fe1C2P7      | -2015.85030380 | 14.09 |
| 76 | 05a-Isocloso-Fe3C2P7          | -2015.85030340 | 14.09 |
| 77 | 02b-TetrcTriPri2-Fe2P3C1      | -2015.85030070 | 14.09 |
| 78 | 05b-Isocloso-Fe1P2C6          | -2015.85029970 | 14.09 |
| 79 | 02a-TetrcTriPri2-Fe2C4P2      | -2015.85029520 | 14.09 |
| 80 | 02a-TetrcTriPri2-Fe1C3P4      | -2015.85029050 | 14.10 |
| 81 | 05a-Isocloso-Fe1C1P8          | -2015.85028020 | 14.10 |

|     |                               |                |       |
|-----|-------------------------------|----------------|-------|
| 82  | 01b-TetrcTriPri1-Fe3P2C7      | -2015.85027330 | 14.11 |
| 83  | 04b-BicapSqAntipr-Fe2P4C2     | -2015.85026480 | 14.11 |
| 84  | 05a-Isocloso-Fe1C4P1          | -2015.85025950 | 14.12 |
| 85  | 02b-TetrcTriPri2-Fe3P3C4      | -2015.85024720 | 14.12 |
| 86  | 02a-TetrcTriPri2-Fe3C1P4      | -2015.84974280 | 14.44 |
| 87  | 03a-BicapCub-Fe2C5P2          | -2015.84973580 | 14.45 |
| 88  | 05a-Isocloso-Fe2C4P1          | -2015.84973260 | 14.45 |
| 89  | 05b-Isocloso-Fe1P4C1          | -2015.84972620 | 14.45 |
| 90  | 01b-TetrcTriPri1-Fe3P1C6      | -2015.84971900 | 14.46 |
| 91  | 02b-TetrcTriPri2-Fe2P2C3      | -2015.84970050 | 14.47 |
| 92  | 05b-Isocloso-Fe1P1C8          | -2015.84969790 | 14.47 |
| 93  | 01a-TetrcTriPri1-Fe2C3P1      | -2015.84968740 | 14.48 |
| 94  | 01a-TetrcTriPri1-Fe3C3P1      | -2015.84967310 | 14.48 |
| 95  | 05a-Isocloso-Fe1C2P6          | -2015.84964350 | 14.50 |
| 96  | 01b-TetrcTriPri1-Fe2P2C6      | -2015.84964120 | 14.50 |
| 97  | 02b-TetrcTriPri2-Fe3P2C5_i-30 | -2015.84938440 | 14.67 |
| 98  | 04a-BicapSqAntipr-Fe2C2P7     | -2015.84918460 | 14.79 |
| 99  | 04b-BicapSqAntipr-Fe2P2C5     | -2015.84916870 | 14.80 |
| 100 | 04a-BicapSqAntipr-Fe2C1P4     | -2015.84909620 | 14.85 |
| 101 | 01a-TetrcTriPri1-Fe3C3P3      | -2015.84892630 | 14.95 |
| 102 | 04a-BicapSqAntipr-Fe2C2P3     | -2015.84605610 | 16.75 |
| 103 | 01a-TetrcTriPri1-Fe1C1P4      | -2015.84597630 | 16.80 |
| 104 | 05b-Isocloso-Fe3P1C1          | -2015.84596540 | 16.81 |
| 105 | 05a-Isocloso-Fe1C1P4          | -2015.84595780 | 16.82 |
| 106 | 04b-BicapSqAntipr-Fe2P2C3     | -2015.84595070 | 16.82 |
| 107 | 02a-TetrcTriPri2-Fe3C1P2      | -2015.84594730 | 16.82 |
| 108 | 05b-Isocloso-Fe1P1C6          | -2015.84594570 | 16.82 |
| 109 | 02b-TetrcTriPri2-Fe3P3C5      | -2015.84593210 | 16.83 |
| 110 | 05a-Isocloso-Fe1C1P6          | -2015.84591940 | 16.84 |
| 111 | 02b-TetrcTriPri2-Fe3P1C2      | -2015.84591490 | 16.84 |
| 112 | 01b-TetrcTriPri1-Fe3P4C3      | -2015.84591170 | 16.84 |
| 113 | 02a-TetrcTriPri2-Fe3C3P5      | -2015.84590390 | 16.85 |
| 114 | 05b-Isocloso-Fe1P1C4          | -2015.84588040 | 16.86 |
| 115 | 05a-Isocloso-Fe2C2P7          | -2015.84089300 | 19.99 |
| 116 | 02a-TetrcTriPri2-Fe3C2P7      | -2015.84088020 | 20.00 |
| 117 | 04b-BicapSqAntipr-Fe2P5C1     | -2015.84087550 | 20.01 |
| 118 | 04a-BicapSqAntipr-Fe2C3P3     | -2015.84086630 | 20.01 |
| 119 | 02b-TetrcTriPri2-Fe2P5C1      | -2015.84084710 | 20.02 |
| 120 | 02a-TetrcTriPri2-Fe3C4P3      | -2015.84084470 | 20.02 |
| 121 | 04b-BicapSqAntipr-Fe2P3C3     | -2015.84084450 | 20.02 |
| 122 | 02a-TetrcTriPri2-Fe2C1P1      | -2015.84083920 | 20.03 |
| 123 | 03b-BicapCub-Fe2P2C4          | -2015.84083650 | 20.03 |

|     |                                |                |       |
|-----|--------------------------------|----------------|-------|
| 124 | 05a-Isocloso-Fe2C2P3           | -2015.84083610 | 20.03 |
| 125 | 05b-Isocloso-Fe2P3C6           | -2015.84082440 | 20.04 |
| 126 | 03b-BicapCub-Fe2P4C3           | -2015.84081740 | 20.04 |
| 127 | 01b-TetrTriPri1-Fe3P5C4        | -2015.84081180 | 20.05 |
| 128 | 05b-Isocloso-Fe3P5C1           | -2015.84080480 | 20.05 |
| 129 | 02b-TetrTriPri2-Fe1P1C2        | -2015.84079530 | 20.06 |
| 130 | 01b-TetrTriPri1-Fe1P1C1        | -2015.84079050 | 20.06 |
| 131 | 01b-TetrTriPri1-Fe2P5C4        | -2015.84077860 | 20.07 |
| 132 | 05b-Isocloso-Fe1P2C3           | -2015.84076000 | 20.08 |
| 133 | 05b-Isocloso-Fe1P1C1           | -2015.84075890 | 20.08 |
| 134 | 04b-BicapSqAntipr-Fe2P2C2      | -2015.84074760 | 20.09 |
| 135 | 05b-Isocloso-Fe3P1C5           | -2015.84074130 | 20.09 |
| 136 | 01b-TetrTriPri1-Fe1P2C6        | -2015.84019310 | 20.43 |
| 137 | 01b-TetrTriPri1-Fe1P1C2        | -2015.84019100 | 20.43 |
| 138 | 01b-TetrTriPri1-Fe1P3C5        | -2015.84019070 | 20.43 |
| 139 | 02a-TetrTriPri2-Fe1C6P1        | -2015.84018940 | 20.44 |
| 140 | 02a-TetrTriPri2-Fe1C2P4        | -2015.84018800 | 20.44 |
| 141 | 04b-BicapSqAntipr-Fe2P3C4      | -2015.84014880 | 20.46 |
| 142 | 01b-TetrTriPri1-Fe1P2C3        | -2015.84012250 | 20.48 |
| 143 | 02a-TetrTriPri2-Fe1C5P1        | -2015.84010920 | 20.49 |
| 144 | 01b-TetrTriPri1-Fe3P2C4        | -2015.84010850 | 20.49 |
| 145 | 03b-BicapCub-Fe2P1C2           | -2015.84010290 | 20.49 |
| 146 | 05a-Isocloso-Fe3C3P2           | -2015.84010250 | 20.49 |
| 147 | 03b-BicapCub-Fe2P1C4           | -2015.84009720 | 20.49 |
| 148 | 02a-TetrTriPri2-Fe1C2P6        | -2015.84007690 | 20.51 |
| 149 | 02a-TetrTriPri2-Fe1C8P1        | -2015.84005400 | 20.52 |
| 150 | 01a-TetrTriPri1-Fe1C3P4        | -2015.83862830 | 21.42 |
| 151 | 02a-TetrTriPri2-Fe3C2P1_r-17   | -2015.83860140 | 21.43 |
| 152 | 05a-Isocloso-Fe2C3P4           | -2015.83858660 | 21.44 |
| 153 | 05b-Isocloso-Fe3P2C5           | -2015.83858030 | 21.45 |
| 154 | 05a-Isocloso-Fe1C1P5           | -2015.83857640 | 21.45 |
| 155 | 05a-Isocloso-Fe2C3P3           | -2015.83857240 | 21.45 |
| 156 | 05b-Isocloso-Fe1P1C7           | -2015.83855790 | 21.46 |
| 157 | 05b-Isocloso-Fe3P1C4           | -2015.83854610 | 21.47 |
| 158 | 05a-Isocloso-Fe1C3P5           | -2015.83852900 | 21.48 |
| 159 | 04a-BicapSqAntipr-Fe2C2P6_r-33 | -2015.83852400 | 21.48 |
| 160 | 03a-BicapCub-Fe2C2P5           | -2015.83847860 | 21.51 |
| 161 | 04a-BicapSqAntipr-Fe2C2P6_i-33 | -2015.83836080 | 21.58 |
| 162 | 04b-BicapSqAntipr-Fe1P1C5_r-36 | -2015.83738030 | 22.20 |
| 163 | 03b-BicapCub-Fe1P1C6           | -2015.83734330 | 22.22 |
| 164 | 05b-Isocloso-Fe2P5C1           | -2015.83734300 | 22.22 |
| 165 | 02a-TetrTriPri2-Fe1C1P7        | -2015.83731570 | 22.24 |

|     |                                |                |       |
|-----|--------------------------------|----------------|-------|
| 166 | 05b-Isocloso-Fe2P1C5_r-22      | -2015.83731290 | 22.24 |
| 167 | 05b-Isocloso-Fe2P4C2           | -2015.83729230 | 22.25 |
| 168 | 02a-TetrcTriPri2-Fe1C4P3       | -2015.83727640 | 22.26 |
| 169 | 04b-BicapSqAntipr-Fe1P1C5_i-36 | -2015.83653630 | 22.73 |
| 170 | 03b-BicapCub-Fe2P3C3           | -2015.83651510 | 22.74 |
| 171 | 05b-Isocloso-Fe2P1C5_i-22      | -2015.83646570 | 22.77 |
| 172 | 01b-TetrcTriPri1-Fe3P3C6       | -2015.83641500 | 22.80 |
| 173 | 03a-BicapCub-Fe2C1P6           | -2015.83608640 | 23.01 |
| 174 | 02b-TetrcTriPri2-Fe1P2C5       | -2015.83607120 | 23.02 |
| 175 | 02b-TetrcTriPri2-Fe2P1C4       | -2015.83606340 | 23.02 |
| 176 | 05b-Isocloso-Fe3P1C3           | -2015.83605270 | 23.03 |
| 177 | 02a-TetrcTriPri2-Fe1C4P2       | -2015.83604520 | 23.04 |
| 178 | 02b-TetrcTriPri2-Fe1P2C3       | -2015.83603810 | 23.04 |
| 179 | 05b-Isocloso-Fe2P1C4           | -2015.83603710 | 23.04 |
| 180 | 01b-TetrcTriPri1-Fe1P4C3       | -2015.83602820 | 23.05 |
| 181 | 02b-TetrcTriPri2-Fe2P1C3       | -2015.83601660 | 23.05 |
| 182 | 02a-TetrcTriPri2-Fe1C1P1       | -2015.83601190 | 23.06 |
| 183 | 05a-Isocloso-Fe3C3P4           | -2015.83600960 | 23.06 |
| 184 | 05a-Isocloso-Fe3C3P5           | -2015.83599180 | 23.07 |
| 185 | 04a-BicapSqAntipr-Fe2C2P5      | -2015.83598720 | 23.07 |
| 186 | 02a-TetrcTriPri2-Fe2C1P3       | -2015.83598670 | 23.07 |
| 187 | 02a-TetrcTriPri2-Fe2C2P3       | -2015.83597920 | 23.08 |
| 188 | 05b-Isocloso-Fe3P1C7           | -2015.83597290 | 23.08 |
| 189 | 01a-TetrcTriPri1-Fe2C1P5       | -2015.83597130 | 23.08 |
| 190 | 02a-TetrcTriPri2-Fe1C2P5       | -2015.83596770 | 23.08 |
| 191 | 05b-Isocloso-Fe3P3C5           | -2015.83594840 | 23.10 |
| 192 | 02b-TetrcTriPri2-Fe2P2C5       | -2015.83593060 | 23.11 |
| 193 | 05a-Isocloso-Fe3C1P7           | -2015.83519160 | 23.57 |
| 194 | 04b-BicapSqAntipr-Fe2P1C4      | -2015.83516370 | 23.59 |
| 195 | 04b-BicapSqAntipr-Fe2P2C7      | -2015.83516060 | 23.59 |
| 196 | 01a-TetrcTriPri1-Fe1C4P3_r-35  | -2015.83513610 | 23.61 |
| 197 | 01a-TetrcTriPri1-Fe2C2P6       | -2015.83511780 | 23.62 |
| 198 | 05b-Isocloso-Fe2P4C1           | -2015.83511390 | 23.62 |
| 199 | 02b-TetrcTriPri2-Fe3P1C4       | -2015.83506570 | 23.65 |
| 200 | 03b-BicapCub-Fe2P5C2           | -2015.83503960 | 23.67 |
| 201 | 01a-TetrcTriPri1-Fe3C2P5       | -2015.83475580 | 23.85 |
| 202 | 01a-TetrcTriPri1-Fe1C4P3_i-35  | -2015.83412200 | 24.24 |
| 203 | 02a-TetrcTriPri2-Fe1C1P3       | -2015.83340320 | 24.69 |
| 204 | 04a-BicapSqAntipr-Fe2C1P8      | -2015.83337990 | 24.71 |
| 205 | 03a-BicapCub-Fe2C5P1           | -2015.83336770 | 24.72 |
| 206 | 04b-BicapSqAntipr-Fe2P1C8      | -2015.83332690 | 24.74 |
| 207 | 04b-BicapSqAntipr-Fe2P3C6      | -2015.83123820 | 26.05 |

|     |                              |                |       |
|-----|------------------------------|----------------|-------|
| 208 | 04b-BicapSqAntipr-Fe2P1C3    | -2015.83123640 | 26.05 |
| 209 | 05b-Isocloso-Fe2P2C7         | -2015.83121080 | 26.07 |
| 210 | 05b-Isocloso-Fe3P3C3         | -2015.83105510 | 26.17 |
| 211 | 02b-TetrTriPri2-Fe1P2C6      | -2015.83104490 | 26.17 |
| 212 | 03a-BicapCub-Fe2C1P4         | -2015.83104450 | 26.17 |
| 213 | 05b-Isocloso-Fe3P3C2         | -2015.83104040 | 26.18 |
| 214 | 01a-TetrTriPri1-Fe3C2P3      | -2015.83103490 | 26.18 |
| 215 | 02b-TetrTriPri2-Fe2P3C4      | -2015.83103100 | 26.18 |
| 216 | 03a-BicapCub-Fe2C1P2         | -2015.83102980 | 26.18 |
| 217 | 04a-BicapSqAntipr-Fe2C3P4    | -2015.83100190 | 26.20 |
| 218 | 02b-TetrTriPri2-Fe1P2C4      | -2015.83099790 | 26.20 |
| 219 | 02b-TetrTriPri2-Fe1P5C1      | -2015.83099030 | 26.21 |
| 220 | 01b-TetrTriPri1-Fe2P2C3      | -2015.83097280 | 26.22 |
| 221 | 01a-TetrTriPri1-Fe1C2P6      | -2015.83096750 | 26.22 |
| 222 | 02b-TetrTriPri2-Fe1P6C1      | -2015.83094660 | 26.24 |
| 223 | 01b-TetrTriPri1-Fe3P1C8      | -2015.83057600 | 26.47 |
| 224 | 05b-Isocloso-Fe2P1C7         | -2015.83055410 | 26.48 |
| 225 | 01b-TetrTriPri1-Fe1P4C5      | -2015.83054230 | 26.49 |
| 226 | 01a-TetrTriPri1-Fe1C2P3      | -2015.83034630 | 26.61 |
| 227 | 01b-TetrTriPri1-Fe2P2C7      | -2015.83034220 | 26.62 |
| 228 | 02b-TetrTriPri2-Fe3P3C6      | -2015.82914180 | 27.37 |
| 229 | 02b-TetrTriPri2-Fe3P2C3      | -2015.82914000 | 27.37 |
| 230 | 02a-TetrTriPri2-Fe2C2P6      | -2015.82912730 | 27.38 |
| 231 | 02a-TetrTriPri2-Fe1C3P2      | -2015.82912360 | 27.38 |
| 232 | 05b-Isocloso-Fe3P1C8         | -2015.82911120 | 27.39 |
| 233 | 02a-TetrTriPri2-Fe2C3P4      | -2015.82910000 | 27.39 |
| 234 | 05a-Isocloso-Fe3C2P5         | -2015.82909960 | 27.39 |
| 235 | 02b-TetrTriPri2-Fe2P2C4      | -2015.82909350 | 27.40 |
| 236 | 02a-TetrTriPri2-Fe1C1P8      | -2015.82908790 | 27.40 |
| 237 | 02b-TetrTriPri2-Fe2P3C2      | -2015.82908780 | 27.40 |
| 238 | 05a-Isocloso-Fe3C3P3         | -2015.82908320 | 27.41 |
| 239 | 05a-Isocloso-Fe1C2P7         | -2015.82907520 | 27.41 |
| 240 | 02b-TetrTriPri2-Fe3P4C4      | -2015.82906690 | 27.42 |
| 241 | 05a-Isocloso-Fe2C1P5_r-77    | -2015.82905270 | 27.42 |
| 242 | 04a-BicapSqAntipr-Fe2C1P5    | -2015.82903840 | 27.43 |
| 243 | 05b-Isocloso-Fe1P2C7         | -2015.82903260 | 27.44 |
| 244 | 03b-BicapCub-Fe2P2C1         | -2015.82903250 | 27.44 |
| 245 | 03a-BicapCub-Fe2C6P1         | -2015.82902050 | 27.44 |
| 246 | 02a-TetrTriPri2-Fe2C1P8_r-24 | -2015.82900510 | 27.45 |
| 247 | 03b-BicapCub-Fe2P6C1         | -2015.82899920 | 27.46 |
| 248 | 01b-TetrTriPri1-Fe1P1C7      | -2015.82898170 | 27.47 |
| 249 | 03a-BicapCub-Fe2C3P4         | -2015.82894400 | 27.49 |



|     |                              |                |       |
|-----|------------------------------|----------------|-------|
| 250 | 02a-TetrTriPri2-Fe2C1P8_i-24 | -2015.82893090 | 27.50 |
| 251 | 04b-BicapSqAntipr-Fe2P2C4    | -2015.82892280 | 27.51 |
| 252 | 01b-TetrTriPri1-Fe2P1C3      | -2015.82890530 | 27.52 |
| 253 | 01b-TetrTriPri1-Fe3P2C2      | -2015.82889790 | 27.52 |
| 254 | 01b-TetrTriPri1-Fe3P2C1      | -2015.82889420 | 27.52 |
| 255 | 01a-TetrTriPri1-Fe1C3P1      | -2015.82889230 | 27.52 |
| 256 | 04b-BicapSqAntipr-Fe2P1C6    | -2015.82889150 | 27.53 |
| 257 | 03b-BicapCub-Fe2P1C1         | -2015.82886930 | 27.54 |
| 258 | 04b-BicapSqAntipr-Fe2P3C2    | -2015.82886660 | 27.54 |
| 259 | 01a-TetrTriPri1-Fe2C2P2      | -2015.82886640 | 27.54 |
| 260 | 02a-TetrTriPri2-Fe1C2P2      | -2015.82885860 | 27.55 |
| 261 | 01a-TetrTriPri1-Fe3C1P4      | -2015.82885490 | 27.55 |
| 262 | 05b-Isocloso-Fe3P3C1         | -2015.82875190 | 27.61 |
| 263 | 02a-TetrTriPri2-Fe2C1P6      | -2015.82870390 | 27.64 |
| 264 | 01a-TetrTriPri1-Fe1C2P7      | -2015.82827110 | 27.91 |
| 265 | 05b-Isocloso-Fe2P1C2         | -2015.82820090 | 27.96 |
| 266 | 03b-BicapCub-Fe2P5C1         | -2015.82818010 | 27.97 |
| 267 | 01b-TetrTriPri1-Fe1P2C5      | -2015.82814600 | 27.99 |
| 268 | 05a-Isocloso-Fe1C2P4         | -2015.82724930 | 28.56 |
| 269 | 05a-Isocloso-Fe1C3P1         | -2015.82721030 | 28.58 |
| 270 | 01a-TetrTriPri1-Fe1C3P3      | -2015.82716070 | 28.61 |
| 271 | 02b-TetrTriPri2-Fe3P2C2      | -2015.82715450 | 28.62 |
| 272 | 05a-Isocloso-Fe1C2P1         | -2015.82709740 | 28.65 |
| 273 | 05b-Isocloso-Fe2P1C3         | -2015.82090800 | 32.54 |
| 274 | 05b-Isocloso-Fe3P1C6         | -2015.82089400 | 32.54 |
| 275 | 03a-BicapCub-Fe1C1P4         | -2015.82088400 | 32.55 |
| 276 | 02b-TetrTriPri2-Fe1P1C4      | -2015.82087330 | 32.56 |
| 277 | 02a-TetrTriPri2-Fe1C1P4      | -2015.82084640 | 32.57 |
| 278 | 05a-Isocloso-Fe3C1P6         | -2015.82081580 | 32.59 |
| 279 | 05a-Isocloso-Fe2C1P3         | -2015.82038740 | 32.86 |
| 280 | 05a-Isocloso-Fe2C1P5_i-77    | -2015.82022850 | 32.96 |
| 281 | 05a-Isocloso-Fe1C3P6         | -2015.82014350 | 33.01 |
| 282 | 02b-TetrTriPri2-Fe3P2C7      | -2015.82013770 | 33.02 |
| 283 | 02b-TetrTriPri2-Fe2P3C3      | -2015.82013230 | 33.02 |
| 284 | 02a-TetrTriPri2-Fe1C3P6      | -2015.82012110 | 33.03 |
| 285 | 02b-TetrTriPri2-Fe3P4C3      | -2015.82012030 | 33.03 |
| 286 | 04a-BicapSqAntipr-Fe2C5P1    | -2015.82011090 | 33.04 |
| 287 | 01a-TetrTriPri1-Fe3C5P4      | -2015.82010680 | 33.04 |
| 288 | 05a-Isocloso-Fe3C5P1         | -2015.82010100 | 33.04 |
| 289 | 01a-TetrTriPri1-Fe2C5P4      | -2015.82009580 | 33.04 |
| 290 | 02b-TetrTriPri2-Fe1P3C6      | -2015.82008650 | 33.05 |
| 291 | 05a-Isocloso-Fe2C3P6         | -2015.82008280 | 33.05 |

|     |                                |                |       |
|-----|--------------------------------|----------------|-------|
| 292 | 05a-Isocloso-Fe1C5P1           | -2015.82008120 | 33.05 |
| 293 | 05b-Isocloso-Fe1P2C5           | -2015.82008030 | 33.05 |
| 294 | 02a-TetrcTriPri2-Fe2C3P3       | -2015.82007970 | 33.05 |
| 295 | 02b-TetrcTriPri2-Fe3P5C1       | -2015.82007240 | 33.06 |
| 296 | 04b-BicapSqAntipr-Fe1P2C2      | -2015.82005620 | 33.07 |
| 297 | 04b-BicapSqAntipr-Fe2P1C1      | -2015.82001560 | 33.10 |
| 298 | 01a-TetrcTriPri1-Fe3C4P3       | -2015.81995040 | 33.14 |
| 299 | 03b-BicapCub-Fe2P5C3           | -2015.81994430 | 33.14 |
| 300 | 01b-TetrcTriPri1-Fe2P4C3       | -2015.81973290 | 33.27 |
| 301 | 04a-BicapSqAntipr-Fe2C1P1_i-17 | -2015.81973130 | 33.27 |
| 302 | 01b-TetrcTriPri1-Fe1P4C2       | -2015.81971380 | 33.28 |
| 303 | 01a-TetrcTriPri1-Fe1C4P2       | -2015.81962790 | 33.34 |
| 304 | 04a-BicapSqAntipr-Fe2C1P1_r-17 | -2015.81962570 | 33.34 |
| 305 | 01a-TetrcTriPri1-Fe1C4P5       | -2015.81849970 | 34.05 |
| 306 | 05b-Isocloso-Fe1P2C4           | -2015.81734020 | 34.77 |
| 307 | 05b-Isocloso-Fe1P3C1           | -2015.81733710 | 34.78 |
| 308 | 05b-Isocloso-Fe1P2C1           | -2015.81733260 | 34.78 |
| 309 | 02b-TetrcTriPri2-Fe3P4C1       | -2015.81731090 | 34.79 |
| 310 | 01a-TetrcTriPri1-Fe3C6P2       | -2015.81661450 | 35.23 |
| 311 | 02a-TetrcTriPri2-Fe1C4P1       | -2015.81653780 | 35.28 |
| 312 | 01a-TetrcTriPri1-Fe2C7P1       | -2015.81652230 | 35.29 |
| 313 | 01a-TetrcTriPri1-Fe2C6P1       | -2015.81649730 | 35.30 |
| 314 | 05b-Isocloso-Fe3P1C2           | -2015.81614660 | 35.52 |
| 315 | 01b-TetrcTriPri1-Fe1P1C3       | -2015.81613810 | 35.53 |
| 316 | 04b-BicapSqAntipr-Fe2P2C1      | -2015.81609530 | 35.56 |
| 317 | 02a-TetrcTriPri2-Fe2C1P7       | -2015.81606760 | 35.57 |
| 318 | 01b-TetrcTriPri1-Fe2P3C1       | -2015.81536380 | 36.01 |
| 319 | 01b-TetrcTriPri1-Fe3P3C1       | -2015.81533070 | 36.04 |
| 320 | 01a-TetrcTriPri1-Fe1C1P2       | -2015.81450410 | 36.55 |
| 321 | 05a-Isocloso-Fe1C2P3           | -2015.81416060 | 36.77 |
| 322 | 02b-TetrcTriPri2-Fe3P2C1       | -2015.81409290 | 36.81 |
| 323 | 02a-TetrcTriPri2-Fe1C1P2       | -2015.81408420 | 36.82 |
| 324 | 03b-BicapCub-Fe2P2C5           | -2015.81407570 | 36.82 |
| 325 | 04a-BicapSqAntipr-Fe2C2P2      | -2015.81405080 | 36.84 |
| 326 | 01b-TetrcTriPri1-Fe3P3C3       | -2015.81401760 | 36.86 |
| 327 | 05a-Isocloso-Fe1C1P1           | -2015.81397840 | 36.88 |
| 328 | 04b-BicapSqAntipr-Fe1P1C2      | -2015.81365740 | 37.09 |
| 329 | 03a-BicapCub-Fe1C1P2           | -2015.81363410 | 37.10 |
| 330 | 04a-BicapSqAntipr-Fe1C1P2      | -2015.81360680 | 37.12 |
| 331 | 02a-TetrcTriPri2-Fe1C3P1       | -2015.81357270 | 37.14 |
| 332 | 05a-Isocloso-Fe2C2P6           | -2015.81355920 | 37.15 |
| 333 | 04a-BicapSqAntipr-Fe1C2P1      | -2015.81350320 | 37.18 |

|     |                                |                |       |
|-----|--------------------------------|----------------|-------|
| 334 | 05b-Isocloso-Fe2P2C6           | -2015.81350280 | 37.18 |
| 335 | 04a-BicapSqAntipr-Fe2C3P6      | -2015.81171580 | 38.30 |
| 336 | 05a-Isocloso-Fe3C1P4           | -2015.81170490 | 38.31 |
| 337 | 02b-TetrcTriPri2-Fe1P5C3       | -2015.81169130 | 38.32 |
| 338 | 01b-TetrcTriPri1-Fe2P3C3       | -2015.81167870 | 38.33 |
| 339 | 05a-Isocloso-Fe2C4P2           | -2015.81167820 | 38.33 |
| 340 | 04a-BicapSqAntipr-Fe2C1P3      | -2015.81166900 | 38.33 |
| 341 | 05a-Isocloso-Fe2C2P5           | -2015.81120710 | 38.62 |
| 342 | 05b-Isocloso-Fe2P1C8           | -2015.81115600 | 38.65 |
| 343 | 04b-BicapSqAntipr-Fe1P1C4_r-34 | -2015.81108450 | 38.70 |
| 344 | 01a-TetrcTriPri1-Fe2C4P4       | -2015.81102040 | 38.74 |
| 345 | 04b-BicapSqAntipr-Fe1P1C4_i-34 | -2015.81035370 | 39.16 |
| 346 | 04b-BicapSqAntipr-Fe2P1C2      | -2015.80964840 | 39.60 |
| 347 | 01a-TetrcTriPri1-Fe3C4P2       | -2015.80963430 | 39.61 |
| 348 | 05b-Isocloso-Fe2P3C1           | -2015.80963420 | 39.61 |
| 349 | 02b-TetrcTriPri2-Fe2P4C1       | -2015.80962990 | 39.61 |
| 350 | 01b-TetrcTriPri1-Fe1P4C1       | -2015.80960740 | 39.63 |
| 351 | 03b-BicapCub-Fe2P3C1           | -2015.80959770 | 39.63 |
| 352 | 01a-TetrcTriPri1-Fe2C4P2       | -2015.80958750 | 39.64 |
| 353 | 05b-Isocloso-Fe3P4C1           | -2015.80956700 | 39.65 |
| 354 | 01a-TetrcTriPri1-Fe1C2P5       | -2015.80831960 | 40.43 |
| 355 | 02a-TetrcTriPri2-Fe3C1P3       | -2015.80817360 | 40.53 |
| 356 | 01a-TetrcTriPri1-Fe3C2P7       | -2015.80816490 | 40.53 |
| 357 | 05a-Isocloso-Fe2C2P2           | -2015.80782280 | 40.75 |
| 358 | 01b-TetrcTriPri1-Fe3P2C5       | -2015.80762040 | 40.87 |
| 359 | 01a-TetrcTriPri1-Fe1C1P8       | -2015.80758040 | 40.90 |
| 360 | 01a-TetrcTriPri1-Fe3C3P2       | -2015.80745690 | 40.98 |
| 361 | 03b-BicapCub-Fe2P3C4           | -2015.80726420 | 41.10 |
| 362 | 01b-TetrcTriPri1-Fe2P1C8       | -2015.80720090 | 41.14 |
| 363 | 01a-TetrcTriPri1-Fe1C1P3       | -2015.80685220 | 41.36 |
| 364 | 02a-TetrcTriPri2-Fe3C2P2       | -2015.80680770 | 41.38 |
| 365 | 05b-Isocloso-Fe1P3C5           | -2015.80673770 | 41.43 |
| 366 | 01b-TetrcTriPri1-Fe1P3C4       | -2015.80668610 | 41.46 |
| 367 | 01b-TetrcTriPri1-Fe1P3C1       | -2015.80663050 | 41.49 |
| 368 | 01a-TetrcTriPri1-Fe2C5P2       | -2015.80636670 | 41.66 |
| 369 | 04b-BicapSqAntipr-Fe2P2C6      | -2015.80633160 | 41.68 |
| 370 | 01a-TetrcTriPri1-Fe2C4P1       | -2015.80627910 | 41.72 |
| 371 | 05a-Isocloso-Fe2C1P7           | -2015.80627450 | 41.72 |
| 372 | 05b-Isocloso-Fe2P3C4           | -2015.80626390 | 41.72 |
| 373 | 05b-Isocloso-Fe2P3C3           | -2015.80622610 | 41.75 |
| 374 | 01a-TetrcTriPri1-Fe3C3P4       | -2015.80587520 | 41.97 |
| 375 | 03a-BicapCub-Fe2C4P1           | -2015.80565040 | 42.11 |

|     |                           |                |       |
|-----|---------------------------|----------------|-------|
| 376 | 01a-TetrTriPri1-Fe2C3P4   | -2015.80555370 | 42.17 |
| 377 | 01b-TetrTriPri1-Fe1P3C3   | -2015.80444200 | 42.87 |
| 378 | 01a-TetrTriPri1-Fe1C3P6   | -2015.80384480 | 43.24 |
| 379 | 05a-Isocloso-Fe1C1P7      | -2015.80376330 | 43.29 |
| 380 | 05b-Isocloso-Fe1P1C5      | -2015.80375820 | 43.30 |
| 381 | 01b-TetrTriPri1-Fe2P1C7   | -2015.80374100 | 43.31 |
| 382 | 02b-TetrTriPri2-Fe3P1C3   | -2015.80367370 | 43.35 |
| 383 | 02b-TetrTriPri2-Fe3P1C5   | -2015.80320310 | 43.65 |
| 384 | 01a-TetrTriPri1-Fe2C1P7   | -2015.80290210 | 43.83 |
| 385 | 02b-TetrTriPri2-Fe2P1C6   | -2015.80284430 | 43.87 |
| 386 | 02b-TetrTriPri2-Fe1P2C2   | -2015.80283000 | 43.88 |
| 387 | 02b-TetrTriPri2-Fe1P1C1   | -2015.80280470 | 43.90 |
| 388 | 05a-Isocloso-Fe3C1P1      | -2015.80280060 | 43.90 |
| 389 | 02b-TetrTriPri2-Fe2P1C2   | -2015.80279660 | 43.90 |
| 390 | 05a-Isocloso-Fe2C1P1      | -2015.80279550 | 43.90 |
| 391 | 04a-BicapSqAntipr-Fe2C1P6 | -2015.80277310 | 43.92 |
| 392 | 02b-TetrTriPri2-Fe1P4C2   | -2015.80273500 | 43.94 |
| 393 | 04b-BicapSqAntipr-Fe2P3C1 | -2015.80259710 | 44.03 |
| 394 | 02a-TetrTriPri2-Fe2C3P5   | -2015.80258690 | 44.03 |
| 395 | 02a-TetrTriPri2-Fe2C3P6   | -2015.80258680 | 44.03 |
| 396 | 01b-TetrTriPri1-Fe2P7C2   | -2015.80256180 | 44.05 |
| 397 | 05a-Isocloso-Fe2C2P4      | -2015.80255830 | 44.05 |
| 398 | 05b-Isocloso-Fe3P2C3      | -2015.80252950 | 44.07 |
| 399 | 05a-Isocloso-Fe3C2P4      | -2015.80250930 | 44.08 |
| 400 | 05a-Isocloso-Fe1C3P2      | -2015.80239360 | 44.15 |
| 401 | 05a-Isocloso-Fe3C3P1      | -2015.80229420 | 44.22 |
| 402 | 02a-TetrTriPri2-Fe1C5P4   | -2015.80222650 | 44.26 |
| 403 | 01a-TetrTriPri1-Fe3C5P2   | -2015.80219740 | 44.28 |
| 404 | 01b-TetrTriPri1-Fe1P3C2   | -2015.80219250 | 44.28 |
| 405 | 03b-BicapCub-Fe2P2C3      | -2015.80216260 | 44.30 |
| 406 | 01b-TetrTriPri1-Fe1P2C4   | -2015.80213170 | 44.32 |
| 407 | 02a-TetrTriPri2-Fe1C3P3   | -2015.80211530 | 44.33 |
| 408 | 03b-BicapCub-Fe2P2C2      | -2015.80210870 | 44.33 |
| 409 | 01b-TetrTriPri1-Fe1P3C6   | -2015.80208990 | 44.34 |
| 410 | 01a-TetrTriPri1-Fe2C5P3   | -2015.80207910 | 44.35 |
| 411 | 01b-TetrTriPri1-Fe1P1C8   | -2015.80202030 | 44.39 |
| 412 | 04b-BicapSqAntipr-Fe1P2C1 | -2015.80104190 | 45.00 |
| 413 | 03a-BicapCub-Fe2C2P1      | -2015.80103480 | 45.01 |
| 414 | 02b-TetrTriPri2-Fe1P4C5   | -2015.80102950 | 45.01 |
| 415 | 01b-TetrTriPri1-Fe3P3C2   | -2015.80101360 | 45.02 |
| 416 | 03b-BicapCub-Fe1P2C1      | -2015.80098030 | 45.04 |
| 417 | 02a-TetrTriPri2-Fe3C1P1   | -2015.80097800 | 45.04 |

|     |                               |                |       |
|-----|-------------------------------|----------------|-------|
| 418 | 01b-TetrcTriPri1-Fe2P3C2      | -2015.80089470 | 45.09 |
| 419 | 01a-TetrcTriPri1-Fe3C4P5      | -2015.79972730 | 45.83 |
| 420 | 01a-TetrcTriPri1-Fe2C4P5      | -2015.79970500 | 45.84 |
| 421 | 01b-TetrcTriPri1-Fe2P5C2      | -2015.79954820 | 45.94 |
| 422 | 02b-TetrcTriPri2-Fe1P2C1      | -2015.79932440 | 46.08 |
| 423 | 05b-Isocloso-Fe3P2C1          | -2015.79932370 | 46.08 |
| 424 | 03a-BicapCub-Fe2C1P3          | -2015.79930460 | 46.09 |
| 425 | 02b-TetrcTriPri2-Fe2P2C7      | -2015.79929710 | 46.10 |
| 426 | 04a-BicapSqAntipr-Fe2C4P1     | -2015.79922950 | 46.14 |
| 427 | 02b-TetrcTriPri2-Fe1P6C3      | -2015.79920680 | 46.15 |
| 428 | 03a-BicapCub-Fe2C2P4          | -2015.79906070 | 46.24 |
| 429 | 03a-BicapCub-Fe2C3P1          | -2015.79853330 | 46.58 |
| 430 | 02a-TetrcTriPri2-Fe2C4P1      | -2015.79850580 | 46.59 |
| 431 | 05a-Isocloso-Fe3C1P2          | -2015.79847860 | 46.61 |
| 432 | 02a-TetrcTriPri2-Fe1C1P5      | -2015.79843800 | 46.64 |
| 433 | 04a-BicapSqAntipr-Fe2C2P1     | -2015.79842950 | 46.64 |
| 434 | 02b-TetrcTriPri2-Fe1P4C1      | -2015.79841570 | 46.65 |
| 435 | 01a-TetrcTriPri1-Fe2C1P4      | -2015.79817300 | 46.80 |
| 436 | 05b-Isocloso-Fe1P3C2          | -2015.79778790 | 47.04 |
| 437 | 01a-TetrcTriPri1-Fe3C8P1      | -2015.79758140 | 47.17 |
| 438 | 01b-TetrcTriPri1-Fe3P3C5      | -2015.79727970 | 47.36 |
| 439 | 05a-Isocloso-Fe1C3P3          | -2015.79707700 | 47.49 |
| 440 | 05b-Isocloso-Fe1P3C3          | -2015.79700750 | 47.53 |
| 441 | 05a-Isocloso-Fe3C2P2          | -2015.79694270 | 47.57 |
| 442 | 04a-BicapSqAntipr-Fe2C1P7     | -2015.79693350 | 47.58 |
| 443 | 04b-BicapSqAntipr-Fe2P4C1     | -2015.79618240 | 48.05 |
| 444 | 02a-TetrcTriPri2-Fe1C2P1      | -2015.79612960 | 48.08 |
| 445 | 05a-Isocloso-Fe3C2P1          | -2015.79606150 | 48.13 |
| 446 | 02a-TetrcTriPri2-Fe1C6P3      | -2015.79604250 | 48.14 |
| 447 | 01b-TetrcTriPri1-Fe1P2C2      | -2015.79603240 | 48.15 |
| 448 | 03b-BicapCub-Fe2P1C3          | -2015.79602620 | 48.15 |
| 449 | 02a-TetrcTriPri2-Fe3C2P4      | -2015.79601770 | 48.15 |
| 450 | 01a-TetrcTriPri1-Fe3C7P2_r-36 | -2015.79542580 | 48.53 |
| 451 | 04a-BicapSqAntipr-Fe2C3P1     | -2015.79539960 | 48.54 |
| 452 | 02b-TetrcTriPri2-Fe3P2C4      | -2015.79539440 | 48.55 |
| 453 | 05b-Isocloso-Fe2P2C4          | -2015.79537040 | 48.56 |
| 454 | 05a-Isocloso-Fe2C2P1          | -2015.79536810 | 48.56 |
| 455 | 03a-BicapCub-Fe2C3P3          | -2015.79536050 | 48.57 |
| 456 | 01a-TetrcTriPri1-Fe2C1P3      | -2015.79513740 | 48.71 |
| 457 | 01a-TetrcTriPri1-Fe3C2P2      | -2015.79508300 | 48.74 |
| 458 | 01a-TetrcTriPri1-Fe1C1P7      | -2015.79493610 | 48.83 |
| 459 | 02b-TetrcTriPri2-Fe2P1C8      | -2015.79489320 | 48.86 |

|     |                              |                |       |
|-----|------------------------------|----------------|-------|
| 460 | 04a-BicapSqAntipr-Fe2C3P2    | -2015.79488380 | 48.87 |
| 461 | 04a-BicapSqAntipr-Fe2C2P4    | -2015.79477310 | 48.94 |
| 462 | 01a-TetrTriPri1-Fe3C7P2_i-36 | -2015.79455380 | 49.07 |
| 463 | 05b-Isocloso-Fe1P1C3         | -2015.79427910 | 49.25 |
| 464 | 02a-TetrTriPri2-Fe3C2P3      | -2015.79404570 | 49.39 |
| 465 | 05a-Isocloso-Fe1C2P2         | -2015.79399540 | 49.42 |
| 466 | 05b-Isocloso-Fe1P2C2         | -2015.79388130 | 49.50 |
| 467 | 05b-Isocloso-Fe1P1C2         | -2015.79303070 | 50.03 |
| 468 | 05b-Isocloso-Fe1P4C2         | -2015.79302630 | 50.03 |
| 469 | 02b-TetrTriPri2-Fe3P3C1      | -2015.79301460 | 50.04 |
| 470 | 02a-TetrTriPri2-Fe2C2P7      | -2015.79299100 | 50.05 |
| 471 | 02b-TetrTriPri2-Fe2P3C5      | -2015.79291990 | 50.10 |
| 472 | 02b-TetrTriPri2-Fe1P6C2      | -2015.79258570 | 50.31 |
| 473 | 05a-Isocloso-Fe3C4P1         | -2015.79257670 | 50.31 |
| 474 | 05a-Isocloso-Fe2C3P1         | -2015.79254170 | 50.34 |
| 475 | 04a-BicapSqAntipr-Fe2C1P2    | -2015.79253410 | 50.34 |
| 476 | 01a-TetrTriPri1-Fe1C2P1      | -2015.79244860 | 50.39 |
| 477 | 03a-BicapCub-Fe2C5P3         | -2015.79244290 | 50.40 |
| 478 | 01a-TetrTriPri1-Fe1C3P5      | -2015.79151050 | 50.98 |
| 479 | 01a-TetrTriPri1-Fe2C3P5      | -2015.79112470 | 51.22 |
| 480 | 05b-Isocloso-Fe3P2C6         | -2015.79103550 | 51.28 |
| 481 | 05a-Isocloso-Fe3C2P6         | -2015.79103280 | 51.28 |
| 482 | 01a-TetrTriPri1-Fe3C7P1      | -2015.79102920 | 51.28 |
| 483 | 01b-TetrTriPri1-Fe1P1C6      | -2015.79074780 | 51.46 |
| 484 | 03b-BicapCub-Fe1P1C4         | -2015.79061740 | 51.54 |
| 485 | 04b-BicapSqAntipr-Fe1P1C3    | -2015.79060060 | 51.55 |
| 486 | 03b-BicapCub-Fe1P1C3         | -2015.79051190 | 51.61 |
| 487 | 02a-TetrTriPri2-Fe3C4P2      | -2015.79019490 | 51.81 |
| 488 | 05b-Isocloso-Fe2P1C1         | -2015.78995290 | 51.96 |
| 489 | 02b-TetrTriPri2-Fe2P1C1      | -2015.78989830 | 51.99 |
| 490 | 02b-TetrTriPri2-Fe1P1C5      | -2015.78962300 | 52.17 |
| 491 | 05a-Isocloso-Fe2C1P2         | -2015.78960260 | 52.18 |
| 492 | 01b-TetrTriPri1-Fe2P1C4      | -2015.78921480 | 52.42 |
| 493 | 01b-TetrTriPri1-Fe3P2C3      | -2015.78914750 | 52.47 |
| 494 | 02a-TetrTriPri2-Fe3C1P5      | -2015.78914710 | 52.47 |
| 495 | 02a-TetrTriPri2-Fe3C2P1_i-17 | -2015.78908950 | 52.50 |
| 496 | 02a-TetrTriPri2-Fe1C6P2      | -2015.78744020 | 53.54 |
| 497 | 05b-Isocloso-Fe2P2C3         | -2015.78734220 | 53.60 |
| 498 | 01a-TetrTriPri1-Fe3C4P1      | -2015.78710910 | 53.74 |
| 499 | 05a-Isocloso-Fe3C2P3         | -2015.78708570 | 53.76 |
| 500 | 03a-BicapCub-Fe1C1P3         | -2015.78708170 | 53.76 |
| 501 | 02b-TetrTriPri2-Fe1P4C3      | -2015.78706040 | 53.78 |

|     |                           |                |       |
|-----|---------------------------|----------------|-------|
| 502 | 02b-TetrcTriPri2-Fe1P1C7  | -2015.78700230 | 53.81 |
| 503 | 05a-Isocloso-Fe1C2P5      | -2015.78678040 | 53.95 |
| 504 | 05b-Isocloso-Fe1P3C6      | -2015.78676390 | 53.96 |
| 505 | 01a-TetrcTriPri1-Fe3C5P3  | -2015.78614920 | 54.35 |
| 506 | 05a-Isocloso-Fe3C1P5      | -2015.78544910 | 54.79 |
| 507 | 01a-TetrcTriPri1-Fe3C6P1  | -2015.78512690 | 54.99 |
| 508 | 02a-TetrcTriPri2-Fe2C5P1  | -2015.78496830 | 55.09 |
| 509 | 02b-TetrcTriPri2-Fe2P1C7  | -2015.78486450 | 55.15 |
| 510 | 05a-Isocloso-Fe1C4P2      | -2015.78475850 | 55.22 |
| 511 | 05a-Isocloso-Fe1C1P2      | -2015.78475770 | 55.22 |
| 512 | 01b-TetrcTriPri1-Fe2P2C1  | -2015.78460490 | 55.32 |
| 513 | 01b-TetrcTriPri1-Fe3P1C2  | -2015.78460030 | 55.32 |
| 514 | 01b-TetrcTriPri1-Fe1P1C5  | -2015.78455240 | 55.35 |
| 515 | 01a-TetrcTriPri1-Fe1C1P5  | -2015.78446080 | 55.41 |
| 516 | 01b-TetrcTriPri1-Fe1P2C1  | -2015.78426030 | 55.53 |
| 517 | 05a-Isocloso-Fe2C3P2      | -2015.78357640 | 55.96 |
| 518 | 05b-Isocloso-Fe3P2C4      | -2015.78348810 | 56.02 |
| 519 | 02b-TetrcTriPri2-Fe2P3C6  | -2015.78344230 | 56.05 |
| 520 | 02b-TetrcTriPri2-Fe1P3C1  | -2015.78341250 | 56.06 |
| 521 | 01a-TetrcTriPri1-Fe3C1P8  | -2015.78326420 | 56.16 |
| 522 | 01a-TetrcTriPri1-Fe1C4P4  | -2015.78318130 | 56.21 |
| 523 | 01a-TetrcTriPri1-Fe2C2P7  | -2015.78315730 | 56.22 |
| 524 | 03a-BicapCub-Fe1C1P6      | -2015.78263530 | 56.55 |
| 525 | 05b-Isocloso-Fe2P3C5      | -2015.78188190 | 57.02 |
| 526 | 02b-TetrcTriPri2-Fe1P5C4  | -2015.78185150 | 57.04 |
| 527 | 05a-Isocloso-Fe2C3P5      | -2015.78184860 | 57.05 |
| 528 | 01b-TetrcTriPri1-Fe2P5C1  | -2015.78184400 | 57.05 |
| 529 | 01b-TetrcTriPri1-Fe3P5C1  | -2015.78184170 | 57.05 |
| 530 | 03a-BicapCub-Fe2C2P3      | -2015.78181960 | 57.06 |
| 531 | 04a-BicapSqAntipr-Fe2C3P5 | -2015.78180760 | 57.07 |
| 532 | 03a-BicapCub-Fe2C2P2      | -2015.78179080 | 57.08 |
| 533 | 01b-TetrcTriPri1-Fe2P1C1  | -2015.78172760 | 57.12 |
| 534 | 01b-TetrcTriPri1-Fe3P1C1  | -2015.78170230 | 57.14 |
| 535 | 01b-TetrcTriPri1-Fe2P1C2  | -2015.78166390 | 57.16 |
| 536 | 03a-BicapCub-Fe2C4P3      | -2015.78122090 | 57.44 |
| 537 | 05b-Isocloso-Fe2P3C2      | -2015.78115790 | 57.48 |
| 538 | 03a-BicapCub-Fe2C1P1      | -2015.78048250 | 57.90 |
| 539 | 01b-TetrcTriPri1-Fe2P2C2  | -2015.78047910 | 57.91 |
| 540 | 01b-TetrcTriPri1-Fe3P1C4  | -2015.78045710 | 57.92 |
| 541 | 02b-TetrcTriPri2-Fe1P5C2  | -2015.78041330 | 57.95 |
| 542 | 05b-Isocloso-Fe1P3C4      | -2015.78003660 | 58.18 |
| 543 | 05a-Isocloso-Fe1C3P4      | -2015.78002910 | 58.19 |

|     |                           |                |       |
|-----|---------------------------|----------------|-------|
| 544 | 02a-TetrcTriPri2-Fe1C4P5  | -2015.77992380 | 58.25 |
| 545 | 01a-TetrcTriPri1-Fe1C1P1  | -2015.77990390 | 58.27 |
| 546 | 05b-Isocloso-Fe1P5C1      | -2015.77861400 | 59.08 |
| 547 | 05a-Isocloso-Fe1C1P3      | -2015.77852980 | 59.13 |
| 548 | 01a-TetrcTriPri1-Fe2C1P6  | -2015.77845370 | 59.18 |
| 549 | 01b-TetrcTriPri1-Fe2P2C4  | -2015.77829450 | 59.28 |
| 550 | 02b-TetrcTriPri2-Fe3P3C3  | -2015.77828910 | 59.28 |
| 551 | 01b-TetrcTriPri1-Fe3P1C7  | -2015.77826490 | 59.29 |
| 552 | 01b-TetrcTriPri1-Fe3P1C5  | -2015.77825890 | 59.30 |
| 553 | 01a-TetrcTriPri1-Fe1C4P1  | -2015.77825190 | 59.30 |
| 554 | 01a-TetrcTriPri1-Fe2C3P2  | -2015.77824250 | 59.31 |
| 555 | 02a-TetrcTriPri2-Fe3C4P1  | -2015.77822140 | 59.32 |
| 556 | 01b-TetrcTriPri1-Fe2P2C5  | -2015.77805740 | 59.42 |
| 557 | 01a-TetrcTriPri1-Fe2C2P5  | -2015.77782960 | 59.57 |
| 558 | 03a-BicapCub-Fe1C2P3      | -2015.77760080 | 59.71 |
| 559 | 04b-BicapSqAntipr-Fe2P3C5 | -2015.77741870 | 59.83 |
| 560 | 01a-TetrcTriPri1-Fe1C3P2  | -2015.77736570 | 59.86 |
| 561 | 02a-TetrcTriPri2-Fe3C3P1  | -2015.77575820 | 60.87 |
| 562 | 02b-TetrcTriPri2-Fe3P4C2  | -2015.77490700 | 61.40 |
| 563 | 02a-TetrcTriPri2-Fe3C3P3  | -2015.77484660 | 61.44 |
| 564 | 04a-BicapSqAntipr-Fe1C1P4 | -2015.77447690 | 61.67 |
| 565 | 03a-BicapCub-Fe1C1P5      | -2015.77444590 | 61.69 |
| 566 | 05b-Isocloso-Fe2P2C5      | -2015.77442010 | 61.71 |
| 567 | 05a-Isocloso-Fe2C1P8      | -2015.77438660 | 61.73 |
| 568 | 02a-TetrcTriPri2-Fe3C3P2  | -2015.77431960 | 61.77 |
| 569 | 01b-TetrcTriPri1-Fe2P7C1  | -2015.77363710 | 62.20 |
| 570 | 01b-TetrcTriPri1-Fe2P6C1  | -2015.77363210 | 62.20 |
| 571 | 01b-TetrcTriPri1-Fe3P6C2  | -2015.77360670 | 62.22 |
| 572 | 01b-TetrcTriPri1-Fe3P7C2  | -2015.77236120 | 63.00 |
| 573 | 02b-TetrcTriPri2-Fe3P4C5  | -2015.77084610 | 63.95 |
| 574 | 02a-TetrcTriPri2-Fe3C4P5  | -2015.77083430 | 63.96 |
| 575 | 01b-TetrcTriPri1-Fe3P6C1  | -2015.77062820 | 64.09 |
| 576 | 01b-TetrcTriPri1-Fe2P6C2  | -2015.77061680 | 64.09 |
| 577 | 01b-TetrcTriPri1-Fe3P8C1  | -2015.77053440 | 64.15 |
| 578 | 02a-TetrcTriPri2-Fe1C7P2  | -2015.77038690 | 64.24 |
| 579 | 04b-BicapSqAntipr-Fe1P2C3 | -2015.77035920 | 64.26 |
| 580 | 02a-TetrcTriPri2-Fe1C3P5  | -2015.77032060 | 64.28 |
| 581 | 02a-TetrcTriPri2-Fe1C5P2  | -2015.77031970 | 64.28 |
| 582 | 03a-BicapCub-Fe2C3P2      | -2015.77022020 | 64.34 |
| 583 | 03b-BicapCub-Fe2P3C2      | -2015.76989060 | 64.55 |
| 584 | 01a-TetrcTriPri1-Fe2C1P1  | -2015.76920010 | 64.98 |
| 585 | 01a-TetrcTriPri1-Fe3C3P5  | -2015.76909200 | 65.05 |



|     |                           |                |       |
|-----|---------------------------|----------------|-------|
| 586 | 02b-TetrcTriPri2-Fe1P3C5  | -2015.76895730 | 65.14 |
| 587 | 02b-TetrcTriPri2-Fe1P7C1  | -2015.76890950 | 65.17 |
| 588 | 02b-TetrcTriPri2-Fe1P7C2  | -2015.76887460 | 65.19 |
| 589 | 01b-TetrcTriPri1-Fe3P6C3  | -2015.76794890 | 65.77 |
| 590 | 01b-TetrcTriPri1-Fe2P6C3  | -2015.76792240 | 65.78 |
| 591 | 01a-TetrcTriPri1-Fe3C1P5  | -2015.76657630 | 66.63 |
| 592 | 01a-TetrcTriPri1-Fe3C1P7  | -2015.76656360 | 66.64 |
| 593 | 01a-TetrcTriPri1-Fe2C2P4  | -2015.76654600 | 66.65 |
| 594 | 01a-TetrcTriPri1-Fe3C1P1  | -2015.76591490 | 67.04 |
| 595 | 03a-BicapCub-Fe2C4P2      | -2015.76464600 | 67.84 |
| 596 | 01a-TetrcTriPri1-Fe2C6P3  | -2015.76364000 | 68.47 |
| 597 | 01a-TetrcTriPri1-Fe2C8P1  | -2015.76360710 | 68.49 |
| 598 | 01a-TetrcTriPri1-Fe3C6P3  | -2015.76358040 | 68.51 |
| 599 | 02a-TetrcTriPri2-Fe1C5P3  | -2015.76353430 | 68.54 |
| 600 | 03b-BicapCub-Fe1P1C5      | -2015.76340400 | 68.62 |
| 601 | 01b-TetrcTriPri1-Fe2P3C5  | -2015.76170950 | 69.68 |
| 602 | 01a-TetrcTriPri1-Fe2C5P1  | -2015.76137630 | 69.89 |
| 603 | 01a-TetrcTriPri1-Fe3C5P1  | -2015.76137570 | 69.89 |
| 604 | 01b-TetrcTriPri1-Fe2P8C1  | -2015.75969510 | 70.95 |
| 605 | 05b-Isocloso-Fe2P2C1      | -2015.75913070 | 71.30 |
| 606 | 05a-Isocloso-Fe2C5P1      | -2015.75782340 | 72.12 |
| 607 | 04a-BicapSqAntipr-Fe1C1P5 | -2015.75729860 | 72.45 |
| 608 | 03b-BicapCub-Fe1P2C3      | -2015.75681470 | 72.76 |
| 609 | 01a-TetrcTriPri1-Fe3C2P6  | -2015.75575940 | 73.42 |
| 610 | 01a-TetrcTriPri1-Fe3C1P6  | -2015.75567090 | 73.47 |
| 611 | 01a-TetrcTriPri1-Fe3C1P2  | -2015.75553790 | 73.56 |
| 612 | 01a-TetrcTriPri1-Fe2C2P1  | -2015.75551580 | 73.57 |
| 613 | 04a-BicapSqAntipr-Fe1C2P2 | -2015.75519980 | 73.77 |
| 614 | 03a-BicapCub-Fe1C2P2      | -2015.75516400 | 73.79 |
| 615 | 03b-BicapCub-Fe1P2C2      | -2015.75503880 | 73.87 |
| 616 | 01a-TetrcTriPri1-Fe2C4P3  | -2015.75416960 | 74.41 |
| 617 | 01b-TetrcTriPri1-Fe2P4C2  | -2015.75394990 | 74.55 |
| 618 | 01b-TetrcTriPri1-Fe3P4C2  | -2015.75387160 | 74.60 |
| 619 | 04a-BicapSqAntipr-Fe1C1P3 | -2015.75273230 | 75.32 |
| 620 | 01a-TetrcTriPri1-Fe2C2P3  | -2015.75249870 | 75.46 |
| 621 | 01a-TetrcTriPri1-Fe2C3P6  | -2015.75239180 | 75.53 |
| 622 | 01a-TetrcTriPri1-Fe3C3P6  | -2015.75237540 | 75.54 |
| 623 | 01a-TetrcTriPri1-Fe3C1P3  | -2015.75237060 | 75.54 |
| 624 | 02a-TetrcTriPri2-Fe1C7P1  | -2015.75195270 | 75.81 |
| 625 | 02a-TetrcTriPri2-Fe3C5P1  | -2015.74916260 | 77.56 |
| 626 | 03b-BicapCub-Fe2P4C2      | -2015.74763090 | 78.52 |
| 627 | 01b-TetrcTriPri1-Fe3P1C3  | -2015.74606780 | 79.50 |

|     |                           |                |        |
|-----|---------------------------|----------------|--------|
| 628 | 01b-TetrcTriPri1-Fe3P5C2  | -2015.74597800 | 79.56  |
| 629 | 01b-TetrcTriPri1-Fe2P5C3  | -2015.74590470 | 79.60  |
| 630 | 01a-TetrcTriPri1-Fe2C6P2  | -2015.74495280 | 80.20  |
| 631 | 04a-BicapSqAntipr-Fe1C2P3 | -2015.74300440 | 81.42  |
| 632 | 02a-TetrcTriPri2-Fe2C2P2  | -2015.74176040 | 82.20  |
| 633 | 02b-TetrcTriPri2-Fe2P2C2  | -2015.74141640 | 82.42  |
| 634 | 01a-TetrcTriPri1-Fe2C3P3  | -2015.74096180 | 82.70  |
| 635 | 02a-TetrcTriPri2-Fe2C1P2  | -2015.73910230 | 83.87  |
| 636 | 03a-BicapCub-Fe1C2P1      | -2015.73730720 | 85.00  |
| 637 | 02b-TetrcTriPri2-Fe3P3C2  | -2015.73688540 | 85.26  |
| 638 | 01b-TetrcTriPri1-Fe3P5C3  | -2015.73246960 | 88.03  |
| 639 | 01b-TetrcTriPri1-Fe2P4C1  | -2015.73210610 | 88.26  |
| 640 | 01b-TetrcTriPri1-Fe3P4C1  | -2015.73204170 | 88.30  |
| 641 | 02a-TetrcTriPri2-Fe2C2P1  | -2015.73008150 | 89.53  |
| 642 | 01a-TetrcTriPri1-Fe2C1P8  | -2015.72774710 | 91.00  |
| 643 | 01a-TetrcTriPri1-Fe3C2P4  | -2015.72773860 | 91.00  |
| 644 | 01b-TetrcTriPri1-Fe2P4C4  | -2015.72005390 | 95.82  |
| 645 | 01b-TetrcTriPri1-Fe3P4C4  | -2015.72004550 | 95.83  |
| 646 | 01a-TetrcTriPri1-Fe2C1P2  | -2015.71881160 | 96.60  |
| 647 | 01a-TetrcTriPri1-Fe3C2P1  | -2015.71306340 | 100.21 |
| 648 | 01a-TetrcTriPri1-Fe1C2P2  | -2015.69214870 | 113.33 |

Table S4A. Initial CpFeCHPHB<sub>8</sub>H<sub>8</sub> structures, 938 in all.

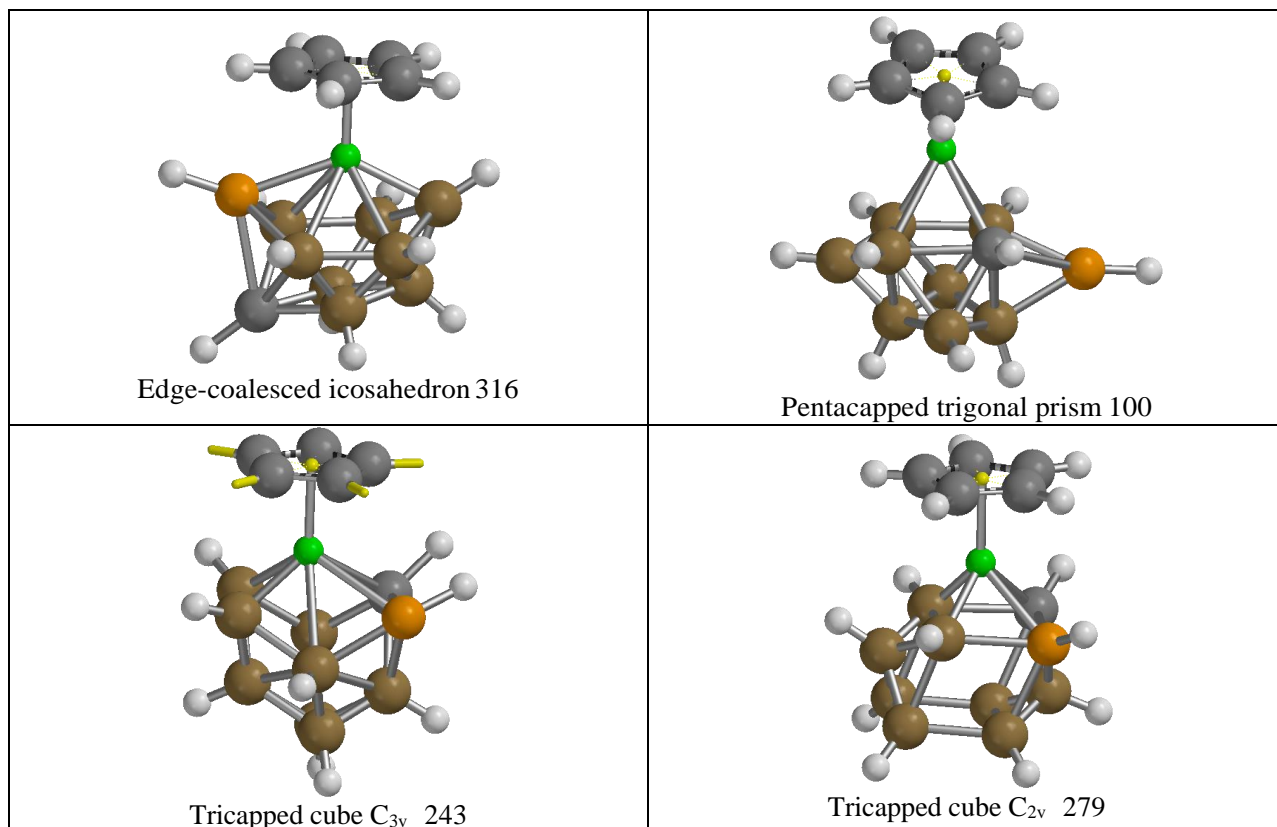

Table S4B. Distance table for the lowest-lying CpFeCHPCH<sub>3</sub>B<sub>8</sub>H<sub>8</sub> structures after M06L/6-311G(d,p) optimization. Included are the ZPcorrected E (a.u.), relative energy (kcal/mol), HOMO/LUMO gaps (eV) and symmetry.

| 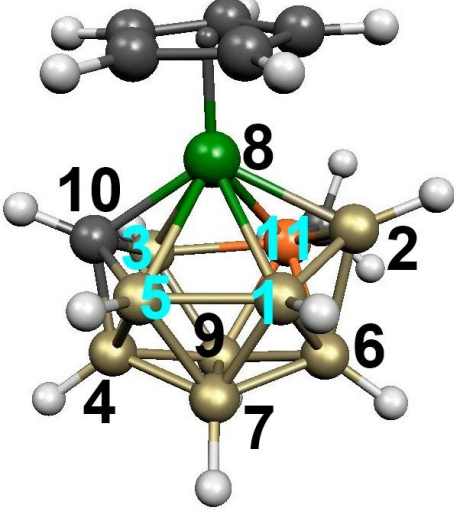 <p>1. -2080.6268794 0.0<br/>C<sub>1</sub> H/L 2.14</p>    | <table border="1"> <thead> <tr> <th></th> <th>1</th> <th>2</th> <th>3</th> <th>4</th> <th>5</th> </tr> </thead> <tbody> <tr><td>1 B</td><td>0.000000</td><td></td><td></td><td></td><td></td></tr> <tr><td>2 B</td><td>1.681038</td><td>0.000000</td><td></td><td></td><td></td></tr> <tr><td>3 B</td><td>3.235196</td><td>3.290628</td><td>0.000000</td><td></td><td></td></tr> <tr><td>4 B</td><td>2.915699</td><td>3.788570</td><td>1.792698</td><td>0.000000</td><td></td></tr> <tr><td>5 B</td><td>1.796982</td><td>3.099490</td><td>2.611129</td><td>1.805835</td><td>0.000000</td></tr> <tr><td>6 B</td><td>1.774566</td><td>1.831012</td><td>3.095267</td><td>2.959331</td><td>2.922489</td></tr> <tr><td>7 B</td><td>1.780116</td><td>2.945712</td><td>2.843816</td><td>1.748376</td><td>1.791609</td></tr> <tr><td>8 Fe</td><td>2.222742</td><td>2.130111</td><td>2.331539</td><td>3.091425</td><td>2.210017</td></tr> <tr><td>9 B</td><td>2.817334</td><td>3.038648</td><td>1.854360</td><td>1.748851</td><td>2.809758</td></tr> <tr><td>10 C</td><td>2.905284</td><td>3.548932</td><td>1.550259</td><td>1.640698</td><td>1.575496</td></tr> <tr><td>11 P</td><td>2.728331</td><td>1.848625</td><td>2.010499</td><td>3.098352</td><td>3.316141</td></tr> <tr> <th></th> <th>6</th> <th>7</th> <th>8</th> <th>9</th> <th>10</th> </tr> <tr><td>6 B</td><td>0.000000</td><td></td><td></td><td></td><td></td></tr> <tr><td>7 B</td><td>1.725459</td><td>0.000000</td><td></td><td></td><td></td></tr> <tr><td>8 Fe</td><td>3.137490</td><td>3.198112</td><td>0.000000</td><td></td><td></td></tr> <tr><td>9 B</td><td>1.840661</td><td>1.788244</td><td>3.251996</td><td>0.000000</td><td></td></tr> <tr><td>10 C</td><td>3.560025</td><td>2.736352</td><td>1.980145</td><td>2.747563</td><td>0.000000</td></tr> <tr><td>11 P</td><td>2.032656</td><td>2.978325</td><td>2.327326</td><td>1.976128</td><td>3.035042</td></tr> </tbody> </table> |          | 1        | 2        | 3        | 4 | 5 | 1 B | 0.000000 |  |  |  |  | 2 B | 1.681038 | 0.000000 |  |  |  | 3 B | 3.235196 | 3.290628 | 0.000000 |  |  | 4 B | 2.915699 | 3.788570 | 1.792698 | 0.000000 |  | 5 B | 1.796982 | 3.099490 | 2.611129 | 1.805835 | 0.000000 | 6 B | 1.774566 | 1.831012 | 3.095267 | 2.959331 | 2.922489 | 7 B | 1.780116 | 2.945712 | 2.843816 | 1.748376 | 1.791609 | 8 Fe | 2.222742 | 2.130111 | 2.331539 | 3.091425 | 2.210017 | 9 B | 2.817334 | 3.038648 | 1.854360 | 1.748851 | 2.809758 | 10 C | 2.905284 | 3.548932 | 1.550259 | 1.640698 | 1.575496 | 11 P  | 2.728331 | 1.848625 | 2.010499 | 3.098352 | 3.316141 |  | 6 | 7 | 8 | 9 | 10 | 6 B | 0.000000 |  |  |  |  | 7 B | 1.725459 | 0.000000 |  |  |  | 8 Fe | 3.137490 | 3.198112 | 0.000000 |  |  | 9 B | 1.840661 | 1.788244 | 3.251996 | 0.000000 |  | 10 C | 3.560025 | 2.736352 | 1.980145 | 2.747563 | 0.000000 | 11 P  | 2.032656 | 2.978325 | 2.327326 | 1.976128 | 3.035042 |
|---------------------------------------------------------------------------------------------------------------------------------------------|---------------------------------------------------------------------------------------------------------------------------------------------------------------------------------------------------------------------------------------------------------------------------------------------------------------------------------------------------------------------------------------------------------------------------------------------------------------------------------------------------------------------------------------------------------------------------------------------------------------------------------------------------------------------------------------------------------------------------------------------------------------------------------------------------------------------------------------------------------------------------------------------------------------------------------------------------------------------------------------------------------------------------------------------------------------------------------------------------------------------------------------------------------------------------------------------------------------------------------------------------------------------------------------------------------------------------------------------------------------------------------------------------------------------------------------------------------------------------------------------------------------------------------------------------------------------------------------------------------------------------------------------------------------------------------------------------------------------------------------------------------------------------------------------------------------------------------------------------------------------------------------------------------------------------------------------------------|----------|----------|----------|----------|---|---|-----|----------|--|--|--|--|-----|----------|----------|--|--|--|-----|----------|----------|----------|--|--|-----|----------|----------|----------|----------|--|-----|----------|----------|----------|----------|----------|-----|----------|----------|----------|----------|----------|-----|----------|----------|----------|----------|----------|------|----------|----------|----------|----------|----------|-----|----------|----------|----------|----------|----------|------|----------|----------|----------|----------|----------|-------|----------|----------|----------|----------|----------|--|---|---|---|---|----|-----|----------|--|--|--|--|-----|----------|----------|--|--|--|------|----------|----------|----------|--|--|-----|----------|----------|----------|----------|--|------|----------|----------|----------|----------|----------|-------|----------|----------|----------|----------|----------|
|                                                                                                                                             | 1                                                                                                                                                                                                                                                                                                                                                                                                                                                                                                                                                                                                                                                                                                                                                                                                                                                                                                                                                                                                                                                                                                                                                                                                                                                                                                                                                                                                                                                                                                                                                                                                                                                                                                                                                                                                                                                                                                                                                       | 2        | 3        | 4        | 5        |   |   |     |          |  |  |  |  |     |          |          |  |  |  |     |          |          |          |  |  |     |          |          |          |          |  |     |          |          |          |          |          |     |          |          |          |          |          |     |          |          |          |          |          |      |          |          |          |          |          |     |          |          |          |          |          |      |          |          |          |          |          |       |          |          |          |          |          |  |   |   |   |   |    |     |          |  |  |  |  |     |          |          |  |  |  |      |          |          |          |  |  |     |          |          |          |          |  |      |          |          |          |          |          |       |          |          |          |          |          |
| 1 B                                                                                                                                         | 0.000000                                                                                                                                                                                                                                                                                                                                                                                                                                                                                                                                                                                                                                                                                                                                                                                                                                                                                                                                                                                                                                                                                                                                                                                                                                                                                                                                                                                                                                                                                                                                                                                                                                                                                                                                                                                                                                                                                                                                                |          |          |          |          |   |   |     |          |  |  |  |  |     |          |          |  |  |  |     |          |          |          |  |  |     |          |          |          |          |  |     |          |          |          |          |          |     |          |          |          |          |          |     |          |          |          |          |          |      |          |          |          |          |          |     |          |          |          |          |          |      |          |          |          |          |          |       |          |          |          |          |          |  |   |   |   |   |    |     |          |  |  |  |  |     |          |          |  |  |  |      |          |          |          |  |  |     |          |          |          |          |  |      |          |          |          |          |          |       |          |          |          |          |          |
| 2 B                                                                                                                                         | 1.681038                                                                                                                                                                                                                                                                                                                                                                                                                                                                                                                                                                                                                                                                                                                                                                                                                                                                                                                                                                                                                                                                                                                                                                                                                                                                                                                                                                                                                                                                                                                                                                                                                                                                                                                                                                                                                                                                                                                                                | 0.000000 |          |          |          |   |   |     |          |  |  |  |  |     |          |          |  |  |  |     |          |          |          |  |  |     |          |          |          |          |  |     |          |          |          |          |          |     |          |          |          |          |          |     |          |          |          |          |          |      |          |          |          |          |          |     |          |          |          |          |          |      |          |          |          |          |          |       |          |          |          |          |          |  |   |   |   |   |    |     |          |  |  |  |  |     |          |          |  |  |  |      |          |          |          |  |  |     |          |          |          |          |  |      |          |          |          |          |          |       |          |          |          |          |          |
| 3 B                                                                                                                                         | 3.235196                                                                                                                                                                                                                                                                                                                                                                                                                                                                                                                                                                                                                                                                                                                                                                                                                                                                                                                                                                                                                                                                                                                                                                                                                                                                                                                                                                                                                                                                                                                                                                                                                                                                                                                                                                                                                                                                                                                                                | 3.290628 | 0.000000 |          |          |   |   |     |          |  |  |  |  |     |          |          |  |  |  |     |          |          |          |  |  |     |          |          |          |          |  |     |          |          |          |          |          |     |          |          |          |          |          |     |          |          |          |          |          |      |          |          |          |          |          |     |          |          |          |          |          |      |          |          |          |          |          |       |          |          |          |          |          |  |   |   |   |   |    |     |          |  |  |  |  |     |          |          |  |  |  |      |          |          |          |  |  |     |          |          |          |          |  |      |          |          |          |          |          |       |          |          |          |          |          |
| 4 B                                                                                                                                         | 2.915699                                                                                                                                                                                                                                                                                                                                                                                                                                                                                                                                                                                                                                                                                                                                                                                                                                                                                                                                                                                                                                                                                                                                                                                                                                                                                                                                                                                                                                                                                                                                                                                                                                                                                                                                                                                                                                                                                                                                                | 3.788570 | 1.792698 | 0.000000 |          |   |   |     |          |  |  |  |  |     |          |          |  |  |  |     |          |          |          |  |  |     |          |          |          |          |  |     |          |          |          |          |          |     |          |          |          |          |          |     |          |          |          |          |          |      |          |          |          |          |          |     |          |          |          |          |          |      |          |          |          |          |          |       |          |          |          |          |          |  |   |   |   |   |    |     |          |  |  |  |  |     |          |          |  |  |  |      |          |          |          |  |  |     |          |          |          |          |  |      |          |          |          |          |          |       |          |          |          |          |          |
| 5 B                                                                                                                                         | 1.796982                                                                                                                                                                                                                                                                                                                                                                                                                                                                                                                                                                                                                                                                                                                                                                                                                                                                                                                                                                                                                                                                                                                                                                                                                                                                                                                                                                                                                                                                                                                                                                                                                                                                                                                                                                                                                                                                                                                                                | 3.099490 | 2.611129 | 1.805835 | 0.000000 |   |   |     |          |  |  |  |  |     |          |          |  |  |  |     |          |          |          |  |  |     |          |          |          |          |  |     |          |          |          |          |          |     |          |          |          |          |          |     |          |          |          |          |          |      |          |          |          |          |          |     |          |          |          |          |          |      |          |          |          |          |          |       |          |          |          |          |          |  |   |   |   |   |    |     |          |  |  |  |  |     |          |          |  |  |  |      |          |          |          |  |  |     |          |          |          |          |  |      |          |          |          |          |          |       |          |          |          |          |          |
| 6 B                                                                                                                                         | 1.774566                                                                                                                                                                                                                                                                                                                                                                                                                                                                                                                                                                                                                                                                                                                                                                                                                                                                                                                                                                                                                                                                                                                                                                                                                                                                                                                                                                                                                                                                                                                                                                                                                                                                                                                                                                                                                                                                                                                                                | 1.831012 | 3.095267 | 2.959331 | 2.922489 |   |   |     |          |  |  |  |  |     |          |          |  |  |  |     |          |          |          |  |  |     |          |          |          |          |  |     |          |          |          |          |          |     |          |          |          |          |          |     |          |          |          |          |          |      |          |          |          |          |          |     |          |          |          |          |          |      |          |          |          |          |          |       |          |          |          |          |          |  |   |   |   |   |    |     |          |  |  |  |  |     |          |          |  |  |  |      |          |          |          |  |  |     |          |          |          |          |  |      |          |          |          |          |          |       |          |          |          |          |          |
| 7 B                                                                                                                                         | 1.780116                                                                                                                                                                                                                                                                                                                                                                                                                                                                                                                                                                                                                                                                                                                                                                                                                                                                                                                                                                                                                                                                                                                                                                                                                                                                                                                                                                                                                                                                                                                                                                                                                                                                                                                                                                                                                                                                                                                                                | 2.945712 | 2.843816 | 1.748376 | 1.791609 |   |   |     |          |  |  |  |  |     |          |          |  |  |  |     |          |          |          |  |  |     |          |          |          |          |  |     |          |          |          |          |          |     |          |          |          |          |          |     |          |          |          |          |          |      |          |          |          |          |          |     |          |          |          |          |          |      |          |          |          |          |          |       |          |          |          |          |          |  |   |   |   |   |    |     |          |  |  |  |  |     |          |          |  |  |  |      |          |          |          |  |  |     |          |          |          |          |  |      |          |          |          |          |          |       |          |          |          |          |          |
| 8 Fe                                                                                                                                        | 2.222742                                                                                                                                                                                                                                                                                                                                                                                                                                                                                                                                                                                                                                                                                                                                                                                                                                                                                                                                                                                                                                                                                                                                                                                                                                                                                                                                                                                                                                                                                                                                                                                                                                                                                                                                                                                                                                                                                                                                                | 2.130111 | 2.331539 | 3.091425 | 2.210017 |   |   |     |          |  |  |  |  |     |          |          |  |  |  |     |          |          |          |  |  |     |          |          |          |          |  |     |          |          |          |          |          |     |          |          |          |          |          |     |          |          |          |          |          |      |          |          |          |          |          |     |          |          |          |          |          |      |          |          |          |          |          |       |          |          |          |          |          |  |   |   |   |   |    |     |          |  |  |  |  |     |          |          |  |  |  |      |          |          |          |  |  |     |          |          |          |          |  |      |          |          |          |          |          |       |          |          |          |          |          |
| 9 B                                                                                                                                         | 2.817334                                                                                                                                                                                                                                                                                                                                                                                                                                                                                                                                                                                                                                                                                                                                                                                                                                                                                                                                                                                                                                                                                                                                                                                                                                                                                                                                                                                                                                                                                                                                                                                                                                                                                                                                                                                                                                                                                                                                                | 3.038648 | 1.854360 | 1.748851 | 2.809758 |   |   |     |          |  |  |  |  |     |          |          |  |  |  |     |          |          |          |  |  |     |          |          |          |          |  |     |          |          |          |          |          |     |          |          |          |          |          |     |          |          |          |          |          |      |          |          |          |          |          |     |          |          |          |          |          |      |          |          |          |          |          |       |          |          |          |          |          |  |   |   |   |   |    |     |          |  |  |  |  |     |          |          |  |  |  |      |          |          |          |  |  |     |          |          |          |          |  |      |          |          |          |          |          |       |          |          |          |          |          |
| 10 C                                                                                                                                        | 2.905284                                                                                                                                                                                                                                                                                                                                                                                                                                                                                                                                                                                                                                                                                                                                                                                                                                                                                                                                                                                                                                                                                                                                                                                                                                                                                                                                                                                                                                                                                                                                                                                                                                                                                                                                                                                                                                                                                                                                                | 3.548932 | 1.550259 | 1.640698 | 1.575496 |   |   |     |          |  |  |  |  |     |          |          |  |  |  |     |          |          |          |  |  |     |          |          |          |          |  |     |          |          |          |          |          |     |          |          |          |          |          |     |          |          |          |          |          |      |          |          |          |          |          |     |          |          |          |          |          |      |          |          |          |          |          |       |          |          |          |          |          |  |   |   |   |   |    |     |          |  |  |  |  |     |          |          |  |  |  |      |          |          |          |  |  |     |          |          |          |          |  |      |          |          |          |          |          |       |          |          |          |          |          |
| 11 P                                                                                                                                        | 2.728331                                                                                                                                                                                                                                                                                                                                                                                                                                                                                                                                                                                                                                                                                                                                                                                                                                                                                                                                                                                                                                                                                                                                                                                                                                                                                                                                                                                                                                                                                                                                                                                                                                                                                                                                                                                                                                                                                                                                                | 1.848625 | 2.010499 | 3.098352 | 3.316141 |   |   |     |          |  |  |  |  |     |          |          |  |  |  |     |          |          |          |  |  |     |          |          |          |          |  |     |          |          |          |          |          |     |          |          |          |          |          |     |          |          |          |          |          |      |          |          |          |          |          |     |          |          |          |          |          |      |          |          |          |          |          |       |          |          |          |          |          |  |   |   |   |   |    |     |          |  |  |  |  |     |          |          |  |  |  |      |          |          |          |  |  |     |          |          |          |          |  |      |          |          |          |          |          |       |          |          |          |          |          |
|                                                                                                                                             | 6                                                                                                                                                                                                                                                                                                                                                                                                                                                                                                                                                                                                                                                                                                                                                                                                                                                                                                                                                                                                                                                                                                                                                                                                                                                                                                                                                                                                                                                                                                                                                                                                                                                                                                                                                                                                                                                                                                                                                       | 7        | 8        | 9        | 10       |   |   |     |          |  |  |  |  |     |          |          |  |  |  |     |          |          |          |  |  |     |          |          |          |          |  |     |          |          |          |          |          |     |          |          |          |          |          |     |          |          |          |          |          |      |          |          |          |          |          |     |          |          |          |          |          |      |          |          |          |          |          |       |          |          |          |          |          |  |   |   |   |   |    |     |          |  |  |  |  |     |          |          |  |  |  |      |          |          |          |  |  |     |          |          |          |          |  |      |          |          |          |          |          |       |          |          |          |          |          |
| 6 B                                                                                                                                         | 0.000000                                                                                                                                                                                                                                                                                                                                                                                                                                                                                                                                                                                                                                                                                                                                                                                                                                                                                                                                                                                                                                                                                                                                                                                                                                                                                                                                                                                                                                                                                                                                                                                                                                                                                                                                                                                                                                                                                                                                                |          |          |          |          |   |   |     |          |  |  |  |  |     |          |          |  |  |  |     |          |          |          |  |  |     |          |          |          |          |  |     |          |          |          |          |          |     |          |          |          |          |          |     |          |          |          |          |          |      |          |          |          |          |          |     |          |          |          |          |          |      |          |          |          |          |          |       |          |          |          |          |          |  |   |   |   |   |    |     |          |  |  |  |  |     |          |          |  |  |  |      |          |          |          |  |  |     |          |          |          |          |  |      |          |          |          |          |          |       |          |          |          |          |          |
| 7 B                                                                                                                                         | 1.725459                                                                                                                                                                                                                                                                                                                                                                                                                                                                                                                                                                                                                                                                                                                                                                                                                                                                                                                                                                                                                                                                                                                                                                                                                                                                                                                                                                                                                                                                                                                                                                                                                                                                                                                                                                                                                                                                                                                                                | 0.000000 |          |          |          |   |   |     |          |  |  |  |  |     |          |          |  |  |  |     |          |          |          |  |  |     |          |          |          |          |  |     |          |          |          |          |          |     |          |          |          |          |          |     |          |          |          |          |          |      |          |          |          |          |          |     |          |          |          |          |          |      |          |          |          |          |          |       |          |          |          |          |          |  |   |   |   |   |    |     |          |  |  |  |  |     |          |          |  |  |  |      |          |          |          |  |  |     |          |          |          |          |  |      |          |          |          |          |          |       |          |          |          |          |          |
| 8 Fe                                                                                                                                        | 3.137490                                                                                                                                                                                                                                                                                                                                                                                                                                                                                                                                                                                                                                                                                                                                                                                                                                                                                                                                                                                                                                                                                                                                                                                                                                                                                                                                                                                                                                                                                                                                                                                                                                                                                                                                                                                                                                                                                                                                                | 3.198112 | 0.000000 |          |          |   |   |     |          |  |  |  |  |     |          |          |  |  |  |     |          |          |          |  |  |     |          |          |          |          |  |     |          |          |          |          |          |     |          |          |          |          |          |     |          |          |          |          |          |      |          |          |          |          |          |     |          |          |          |          |          |      |          |          |          |          |          |       |          |          |          |          |          |  |   |   |   |   |    |     |          |  |  |  |  |     |          |          |  |  |  |      |          |          |          |  |  |     |          |          |          |          |  |      |          |          |          |          |          |       |          |          |          |          |          |
| 9 B                                                                                                                                         | 1.840661                                                                                                                                                                                                                                                                                                                                                                                                                                                                                                                                                                                                                                                                                                                                                                                                                                                                                                                                                                                                                                                                                                                                                                                                                                                                                                                                                                                                                                                                                                                                                                                                                                                                                                                                                                                                                                                                                                                                                | 1.788244 | 3.251996 | 0.000000 |          |   |   |     |          |  |  |  |  |     |          |          |  |  |  |     |          |          |          |  |  |     |          |          |          |          |  |     |          |          |          |          |          |     |          |          |          |          |          |     |          |          |          |          |          |      |          |          |          |          |          |     |          |          |          |          |          |      |          |          |          |          |          |       |          |          |          |          |          |  |   |   |   |   |    |     |          |  |  |  |  |     |          |          |  |  |  |      |          |          |          |  |  |     |          |          |          |          |  |      |          |          |          |          |          |       |          |          |          |          |          |
| 10 C                                                                                                                                        | 3.560025                                                                                                                                                                                                                                                                                                                                                                                                                                                                                                                                                                                                                                                                                                                                                                                                                                                                                                                                                                                                                                                                                                                                                                                                                                                                                                                                                                                                                                                                                                                                                                                                                                                                                                                                                                                                                                                                                                                                                | 2.736352 | 1.980145 | 2.747563 | 0.000000 |   |   |     |          |  |  |  |  |     |          |          |  |  |  |     |          |          |          |  |  |     |          |          |          |          |  |     |          |          |          |          |          |     |          |          |          |          |          |     |          |          |          |          |          |      |          |          |          |          |          |     |          |          |          |          |          |      |          |          |          |          |          |       |          |          |          |          |          |  |   |   |   |   |    |     |          |  |  |  |  |     |          |          |  |  |  |      |          |          |          |  |  |     |          |          |          |          |  |      |          |          |          |          |          |       |          |          |          |          |          |
| 11 P                                                                                                                                        | 2.032656                                                                                                                                                                                                                                                                                                                                                                                                                                                                                                                                                                                                                                                                                                                                                                                                                                                                                                                                                                                                                                                                                                                                                                                                                                                                                                                                                                                                                                                                                                                                                                                                                                                                                                                                                                                                                                                                                                                                                | 2.978325 | 2.327326 | 1.976128 | 3.035042 |   |   |     |          |  |  |  |  |     |          |          |  |  |  |     |          |          |          |  |  |     |          |          |          |          |  |     |          |          |          |          |          |     |          |          |          |          |          |     |          |          |          |          |          |      |          |          |          |          |          |     |          |          |          |          |          |      |          |          |          |          |          |       |          |          |          |          |          |  |   |   |   |   |    |     |          |  |  |  |  |     |          |          |  |  |  |      |          |          |          |  |  |     |          |          |          |          |  |      |          |          |          |          |          |       |          |          |          |          |          |
|  <p>2. -2080.6218910 +3.1<br/>C<sub>1</sub> H/L 2.25</p> | <table border="1"> <thead> <tr> <th></th> <th>1</th> <th>2</th> <th>3</th> <th>4</th> <th>5</th> </tr> </thead> <tbody> <tr><td>1 B</td><td>0.000000</td><td></td><td></td><td></td><td></td></tr> <tr><td>2 B</td><td>1.771993</td><td>0.000000</td><td></td><td></td><td></td></tr> <tr><td>3 B</td><td>2.857240</td><td>1.798658</td><td>0.000000</td><td></td><td></td></tr> <tr><td>4 B</td><td>1.849645</td><td>2.966073</td><td>2.915721</td><td>0.000000</td><td></td></tr> <tr><td>5 P</td><td>1.948627</td><td>3.175709</td><td>3.636565</td><td>1.994888</td><td>0.000000</td></tr> <tr><td>6 C</td><td>2.822564</td><td>1.617539</td><td>1.600069</td><td>3.507429</td><td>3.294299</td></tr> <tr><td>7 B</td><td>3.025440</td><td>2.635304</td><td>1.868788</td><td>2.872995</td><td>2.688524</td></tr> <tr><td>8 B</td><td>2.928676</td><td>3.566691</td><td>3.041385</td><td>1.865141</td><td>1.843419</td></tr> <tr><td>9 B</td><td>2.800562</td><td>2.855903</td><td>1.764979</td><td>1.752065</td><td>2.892006</td></tr> <tr><td>10 B</td><td>1.772417</td><td>1.787203</td><td>1.753088</td><td>1.732335</td><td>3.056057</td></tr> <tr><td>11 Fe</td><td>2.182267</td><td>2.145409</td><td>3.091902</td><td>3.327763</td><td>2.146467</td></tr> <tr> <th></th> <th>6</th> <th>7</th> <th>8</th> <th>9</th> <th>10</th> </tr> <tr><td>6 C</td><td>0.000000</td><td></td><td></td><td></td><td></td></tr> <tr><td>7 B</td><td>1.578552</td><td>0.000000</td><td></td><td></td><td></td></tr> <tr><td>8 B</td><td>3.215571</td><td>1.886393</td><td>0.000000</td><td></td><td></td></tr> <tr><td>9 B</td><td>2.746338</td><td>1.838351</td><td>1.698565</td><td>0.000000</td><td></td></tr> <tr><td>10 B</td><td>2.719399</td><td>2.792663</td><td>2.926703</td><td>1.787229</td><td>0.000000</td></tr> <tr><td>11 Fe</td><td>1.911854</td><td>2.355588</td><td>3.094610</td><td>3.464131</td><td>3.244934</td></tr> </tbody> </table> |          | 1        | 2        | 3        | 4 | 5 | 1 B | 0.000000 |  |  |  |  | 2 B | 1.771993 | 0.000000 |  |  |  | 3 B | 2.857240 | 1.798658 | 0.000000 |  |  | 4 B | 1.849645 | 2.966073 | 2.915721 | 0.000000 |  | 5 P | 1.948627 | 3.175709 | 3.636565 | 1.994888 | 0.000000 | 6 C | 2.822564 | 1.617539 | 1.600069 | 3.507429 | 3.294299 | 7 B | 3.025440 | 2.635304 | 1.868788 | 2.872995 | 2.688524 | 8 B  | 2.928676 | 3.566691 | 3.041385 | 1.865141 | 1.843419 | 9 B | 2.800562 | 2.855903 | 1.764979 | 1.752065 | 2.892006 | 10 B | 1.772417 | 1.787203 | 1.753088 | 1.732335 | 3.056057 | 11 Fe | 2.182267 | 2.145409 | 3.091902 | 3.327763 | 2.146467 |  | 6 | 7 | 8 | 9 | 10 | 6 C | 0.000000 |  |  |  |  | 7 B | 1.578552 | 0.000000 |  |  |  | 8 B  | 3.215571 | 1.886393 | 0.000000 |  |  | 9 B | 2.746338 | 1.838351 | 1.698565 | 0.000000 |  | 10 B | 2.719399 | 2.792663 | 2.926703 | 1.787229 | 0.000000 | 11 Fe | 1.911854 | 2.355588 | 3.094610 | 3.464131 | 3.244934 |
|                                                                                                                                             | 1                                                                                                                                                                                                                                                                                                                                                                                                                                                                                                                                                                                                                                                                                                                                                                                                                                                                                                                                                                                                                                                                                                                                                                                                                                                                                                                                                                                                                                                                                                                                                                                                                                                                                                                                                                                                                                                                                                                                                       | 2        | 3        | 4        | 5        |   |   |     |          |  |  |  |  |     |          |          |  |  |  |     |          |          |          |  |  |     |          |          |          |          |  |     |          |          |          |          |          |     |          |          |          |          |          |     |          |          |          |          |          |      |          |          |          |          |          |     |          |          |          |          |          |      |          |          |          |          |          |       |          |          |          |          |          |  |   |   |   |   |    |     |          |  |  |  |  |     |          |          |  |  |  |      |          |          |          |  |  |     |          |          |          |          |  |      |          |          |          |          |          |       |          |          |          |          |          |
| 1 B                                                                                                                                         | 0.000000                                                                                                                                                                                                                                                                                                                                                                                                                                                                                                                                                                                                                                                                                                                                                                                                                                                                                                                                                                                                                                                                                                                                                                                                                                                                                                                                                                                                                                                                                                                                                                                                                                                                                                                                                                                                                                                                                                                                                |          |          |          |          |   |   |     |          |  |  |  |  |     |          |          |  |  |  |     |          |          |          |  |  |     |          |          |          |          |  |     |          |          |          |          |          |     |          |          |          |          |          |     |          |          |          |          |          |      |          |          |          |          |          |     |          |          |          |          |          |      |          |          |          |          |          |       |          |          |          |          |          |  |   |   |   |   |    |     |          |  |  |  |  |     |          |          |  |  |  |      |          |          |          |  |  |     |          |          |          |          |  |      |          |          |          |          |          |       |          |          |          |          |          |
| 2 B                                                                                                                                         | 1.771993                                                                                                                                                                                                                                                                                                                                                                                                                                                                                                                                                                                                                                                                                                                                                                                                                                                                                                                                                                                                                                                                                                                                                                                                                                                                                                                                                                                                                                                                                                                                                                                                                                                                                                                                                                                                                                                                                                                                                | 0.000000 |          |          |          |   |   |     |          |  |  |  |  |     |          |          |  |  |  |     |          |          |          |  |  |     |          |          |          |          |  |     |          |          |          |          |          |     |          |          |          |          |          |     |          |          |          |          |          |      |          |          |          |          |          |     |          |          |          |          |          |      |          |          |          |          |          |       |          |          |          |          |          |  |   |   |   |   |    |     |          |  |  |  |  |     |          |          |  |  |  |      |          |          |          |  |  |     |          |          |          |          |  |      |          |          |          |          |          |       |          |          |          |          |          |
| 3 B                                                                                                                                         | 2.857240                                                                                                                                                                                                                                                                                                                                                                                                                                                                                                                                                                                                                                                                                                                                                                                                                                                                                                                                                                                                                                                                                                                                                                                                                                                                                                                                                                                                                                                                                                                                                                                                                                                                                                                                                                                                                                                                                                                                                | 1.798658 | 0.000000 |          |          |   |   |     |          |  |  |  |  |     |          |          |  |  |  |     |          |          |          |  |  |     |          |          |          |          |  |     |          |          |          |          |          |     |          |          |          |          |          |     |          |          |          |          |          |      |          |          |          |          |          |     |          |          |          |          |          |      |          |          |          |          |          |       |          |          |          |          |          |  |   |   |   |   |    |     |          |  |  |  |  |     |          |          |  |  |  |      |          |          |          |  |  |     |          |          |          |          |  |      |          |          |          |          |          |       |          |          |          |          |          |
| 4 B                                                                                                                                         | 1.849645                                                                                                                                                                                                                                                                                                                                                                                                                                                                                                                                                                                                                                                                                                                                                                                                                                                                                                                                                                                                                                                                                                                                                                                                                                                                                                                                                                                                                                                                                                                                                                                                                                                                                                                                                                                                                                                                                                                                                | 2.966073 | 2.915721 | 0.000000 |          |   |   |     |          |  |  |  |  |     |          |          |  |  |  |     |          |          |          |  |  |     |          |          |          |          |  |     |          |          |          |          |          |     |          |          |          |          |          |     |          |          |          |          |          |      |          |          |          |          |          |     |          |          |          |          |          |      |          |          |          |          |          |       |          |          |          |          |          |  |   |   |   |   |    |     |          |  |  |  |  |     |          |          |  |  |  |      |          |          |          |  |  |     |          |          |          |          |  |      |          |          |          |          |          |       |          |          |          |          |          |
| 5 P                                                                                                                                         | 1.948627                                                                                                                                                                                                                                                                                                                                                                                                                                                                                                                                                                                                                                                                                                                                                                                                                                                                                                                                                                                                                                                                                                                                                                                                                                                                                                                                                                                                                                                                                                                                                                                                                                                                                                                                                                                                                                                                                                                                                | 3.175709 | 3.636565 | 1.994888 | 0.000000 |   |   |     |          |  |  |  |  |     |          |          |  |  |  |     |          |          |          |  |  |     |          |          |          |          |  |     |          |          |          |          |          |     |          |          |          |          |          |     |          |          |          |          |          |      |          |          |          |          |          |     |          |          |          |          |          |      |          |          |          |          |          |       |          |          |          |          |          |  |   |   |   |   |    |     |          |  |  |  |  |     |          |          |  |  |  |      |          |          |          |  |  |     |          |          |          |          |  |      |          |          |          |          |          |       |          |          |          |          |          |
| 6 C                                                                                                                                         | 2.822564                                                                                                                                                                                                                                                                                                                                                                                                                                                                                                                                                                                                                                                                                                                                                                                                                                                                                                                                                                                                                                                                                                                                                                                                                                                                                                                                                                                                                                                                                                                                                                                                                                                                                                                                                                                                                                                                                                                                                | 1.617539 | 1.600069 | 3.507429 | 3.294299 |   |   |     |          |  |  |  |  |     |          |          |  |  |  |     |          |          |          |  |  |     |          |          |          |          |  |     |          |          |          |          |          |     |          |          |          |          |          |     |          |          |          |          |          |      |          |          |          |          |          |     |          |          |          |          |          |      |          |          |          |          |          |       |          |          |          |          |          |  |   |   |   |   |    |     |          |  |  |  |  |     |          |          |  |  |  |      |          |          |          |  |  |     |          |          |          |          |  |      |          |          |          |          |          |       |          |          |          |          |          |
| 7 B                                                                                                                                         | 3.025440                                                                                                                                                                                                                                                                                                                                                                                                                                                                                                                                                                                                                                                                                                                                                                                                                                                                                                                                                                                                                                                                                                                                                                                                                                                                                                                                                                                                                                                                                                                                                                                                                                                                                                                                                                                                                                                                                                                                                | 2.635304 | 1.868788 | 2.872995 | 2.688524 |   |   |     |          |  |  |  |  |     |          |          |  |  |  |     |          |          |          |  |  |     |          |          |          |          |  |     |          |          |          |          |          |     |          |          |          |          |          |     |          |          |          |          |          |      |          |          |          |          |          |     |          |          |          |          |          |      |          |          |          |          |          |       |          |          |          |          |          |  |   |   |   |   |    |     |          |  |  |  |  |     |          |          |  |  |  |      |          |          |          |  |  |     |          |          |          |          |  |      |          |          |          |          |          |       |          |          |          |          |          |
| 8 B                                                                                                                                         | 2.928676                                                                                                                                                                                                                                                                                                                                                                                                                                                                                                                                                                                                                                                                                                                                                                                                                                                                                                                                                                                                                                                                                                                                                                                                                                                                                                                                                                                                                                                                                                                                                                                                                                                                                                                                                                                                                                                                                                                                                | 3.566691 | 3.041385 | 1.865141 | 1.843419 |   |   |     |          |  |  |  |  |     |          |          |  |  |  |     |          |          |          |  |  |     |          |          |          |          |  |     |          |          |          |          |          |     |          |          |          |          |          |     |          |          |          |          |          |      |          |          |          |          |          |     |          |          |          |          |          |      |          |          |          |          |          |       |          |          |          |          |          |  |   |   |   |   |    |     |          |  |  |  |  |     |          |          |  |  |  |      |          |          |          |  |  |     |          |          |          |          |  |      |          |          |          |          |          |       |          |          |          |          |          |
| 9 B                                                                                                                                         | 2.800562                                                                                                                                                                                                                                                                                                                                                                                                                                                                                                                                                                                                                                                                                                                                                                                                                                                                                                                                                                                                                                                                                                                                                                                                                                                                                                                                                                                                                                                                                                                                                                                                                                                                                                                                                                                                                                                                                                                                                | 2.855903 | 1.764979 | 1.752065 | 2.892006 |   |   |     |          |  |  |  |  |     |          |          |  |  |  |     |          |          |          |  |  |     |          |          |          |          |  |     |          |          |          |          |          |     |          |          |          |          |          |     |          |          |          |          |          |      |          |          |          |          |          |     |          |          |          |          |          |      |          |          |          |          |          |       |          |          |          |          |          |  |   |   |   |   |    |     |          |  |  |  |  |     |          |          |  |  |  |      |          |          |          |  |  |     |          |          |          |          |  |      |          |          |          |          |          |       |          |          |          |          |          |
| 10 B                                                                                                                                        | 1.772417                                                                                                                                                                                                                                                                                                                                                                                                                                                                                                                                                                                                                                                                                                                                                                                                                                                                                                                                                                                                                                                                                                                                                                                                                                                                                                                                                                                                                                                                                                                                                                                                                                                                                                                                                                                                                                                                                                                                                | 1.787203 | 1.753088 | 1.732335 | 3.056057 |   |   |     |          |  |  |  |  |     |          |          |  |  |  |     |          |          |          |  |  |     |          |          |          |          |  |     |          |          |          |          |          |     |          |          |          |          |          |     |          |          |          |          |          |      |          |          |          |          |          |     |          |          |          |          |          |      |          |          |          |          |          |       |          |          |          |          |          |  |   |   |   |   |    |     |          |  |  |  |  |     |          |          |  |  |  |      |          |          |          |  |  |     |          |          |          |          |  |      |          |          |          |          |          |       |          |          |          |          |          |
| 11 Fe                                                                                                                                       | 2.182267                                                                                                                                                                                                                                                                                                                                                                                                                                                                                                                                                                                                                                                                                                                                                                                                                                                                                                                                                                                                                                                                                                                                                                                                                                                                                                                                                                                                                                                                                                                                                                                                                                                                                                                                                                                                                                                                                                                                                | 2.145409 | 3.091902 | 3.327763 | 2.146467 |   |   |     |          |  |  |  |  |     |          |          |  |  |  |     |          |          |          |  |  |     |          |          |          |          |  |     |          |          |          |          |          |     |          |          |          |          |          |     |          |          |          |          |          |      |          |          |          |          |          |     |          |          |          |          |          |      |          |          |          |          |          |       |          |          |          |          |          |  |   |   |   |   |    |     |          |  |  |  |  |     |          |          |  |  |  |      |          |          |          |  |  |     |          |          |          |          |  |      |          |          |          |          |          |       |          |          |          |          |          |
|                                                                                                                                             | 6                                                                                                                                                                                                                                                                                                                                                                                                                                                                                                                                                                                                                                                                                                                                                                                                                                                                                                                                                                                                                                                                                                                                                                                                                                                                                                                                                                                                                                                                                                                                                                                                                                                                                                                                                                                                                                                                                                                                                       | 7        | 8        | 9        | 10       |   |   |     |          |  |  |  |  |     |          |          |  |  |  |     |          |          |          |  |  |     |          |          |          |          |  |     |          |          |          |          |          |     |          |          |          |          |          |     |          |          |          |          |          |      |          |          |          |          |          |     |          |          |          |          |          |      |          |          |          |          |          |       |          |          |          |          |          |  |   |   |   |   |    |     |          |  |  |  |  |     |          |          |  |  |  |      |          |          |          |  |  |     |          |          |          |          |  |      |          |          |          |          |          |       |          |          |          |          |          |
| 6 C                                                                                                                                         | 0.000000                                                                                                                                                                                                                                                                                                                                                                                                                                                                                                                                                                                                                                                                                                                                                                                                                                                                                                                                                                                                                                                                                                                                                                                                                                                                                                                                                                                                                                                                                                                                                                                                                                                                                                                                                                                                                                                                                                                                                |          |          |          |          |   |   |     |          |  |  |  |  |     |          |          |  |  |  |     |          |          |          |  |  |     |          |          |          |          |  |     |          |          |          |          |          |     |          |          |          |          |          |     |          |          |          |          |          |      |          |          |          |          |          |     |          |          |          |          |          |      |          |          |          |          |          |       |          |          |          |          |          |  |   |   |   |   |    |     |          |  |  |  |  |     |          |          |  |  |  |      |          |          |          |  |  |     |          |          |          |          |  |      |          |          |          |          |          |       |          |          |          |          |          |
| 7 B                                                                                                                                         | 1.578552                                                                                                                                                                                                                                                                                                                                                                                                                                                                                                                                                                                                                                                                                                                                                                                                                                                                                                                                                                                                                                                                                                                                                                                                                                                                                                                                                                                                                                                                                                                                                                                                                                                                                                                                                                                                                                                                                                                                                | 0.000000 |          |          |          |   |   |     |          |  |  |  |  |     |          |          |  |  |  |     |          |          |          |  |  |     |          |          |          |          |  |     |          |          |          |          |          |     |          |          |          |          |          |     |          |          |          |          |          |      |          |          |          |          |          |     |          |          |          |          |          |      |          |          |          |          |          |       |          |          |          |          |          |  |   |   |   |   |    |     |          |  |  |  |  |     |          |          |  |  |  |      |          |          |          |  |  |     |          |          |          |          |  |      |          |          |          |          |          |       |          |          |          |          |          |
| 8 B                                                                                                                                         | 3.215571                                                                                                                                                                                                                                                                                                                                                                                                                                                                                                                                                                                                                                                                                                                                                                                                                                                                                                                                                                                                                                                                                                                                                                                                                                                                                                                                                                                                                                                                                                                                                                                                                                                                                                                                                                                                                                                                                                                                                | 1.886393 | 0.000000 |          |          |   |   |     |          |  |  |  |  |     |          |          |  |  |  |     |          |          |          |  |  |     |          |          |          |          |  |     |          |          |          |          |          |     |          |          |          |          |          |     |          |          |          |          |          |      |          |          |          |          |          |     |          |          |          |          |          |      |          |          |          |          |          |       |          |          |          |          |          |  |   |   |   |   |    |     |          |  |  |  |  |     |          |          |  |  |  |      |          |          |          |  |  |     |          |          |          |          |  |      |          |          |          |          |          |       |          |          |          |          |          |
| 9 B                                                                                                                                         | 2.746338                                                                                                                                                                                                                                                                                                                                                                                                                                                                                                                                                                                                                                                                                                                                                                                                                                                                                                                                                                                                                                                                                                                                                                                                                                                                                                                                                                                                                                                                                                                                                                                                                                                                                                                                                                                                                                                                                                                                                | 1.838351 | 1.698565 | 0.000000 |          |   |   |     |          |  |  |  |  |     |          |          |  |  |  |     |          |          |          |  |  |     |          |          |          |          |  |     |          |          |          |          |          |     |          |          |          |          |          |     |          |          |          |          |          |      |          |          |          |          |          |     |          |          |          |          |          |      |          |          |          |          |          |       |          |          |          |          |          |  |   |   |   |   |    |     |          |  |  |  |  |     |          |          |  |  |  |      |          |          |          |  |  |     |          |          |          |          |  |      |          |          |          |          |          |       |          |          |          |          |          |
| 10 B                                                                                                                                        | 2.719399                                                                                                                                                                                                                                                                                                                                                                                                                                                                                                                                                                                                                                                                                                                                                                                                                                                                                                                                                                                                                                                                                                                                                                                                                                                                                                                                                                                                                                                                                                                                                                                                                                                                                                                                                                                                                                                                                                                                                | 2.792663 | 2.926703 | 1.787229 | 0.000000 |   |   |     |          |  |  |  |  |     |          |          |  |  |  |     |          |          |          |  |  |     |          |          |          |          |  |     |          |          |          |          |          |     |          |          |          |          |          |     |          |          |          |          |          |      |          |          |          |          |          |     |          |          |          |          |          |      |          |          |          |          |          |       |          |          |          |          |          |  |   |   |   |   |    |     |          |  |  |  |  |     |          |          |  |  |  |      |          |          |          |  |  |     |          |          |          |          |  |      |          |          |          |          |          |       |          |          |          |          |          |
| 11 Fe                                                                                                                                       | 1.911854                                                                                                                                                                                                                                                                                                                                                                                                                                                                                                                                                                                                                                                                                                                                                                                                                                                                                                                                                                                                                                                                                                                                                                                                                                                                                                                                                                                                                                                                                                                                                                                                                                                                                                                                                                                                                                                                                                                                                | 2.355588 | 3.094610 | 3.464131 | 3.244934 |   |   |     |          |  |  |  |  |     |          |          |  |  |  |     |          |          |          |  |  |     |          |          |          |          |  |     |          |          |          |          |          |     |          |          |          |          |          |     |          |          |          |          |          |      |          |          |          |          |          |     |          |          |          |          |          |      |          |          |          |          |          |       |          |          |          |          |          |  |   |   |   |   |    |     |          |  |  |  |  |     |          |          |  |  |  |      |          |          |          |  |  |     |          |          |          |          |  |      |          |          |          |          |          |       |          |          |          |          |          |

| 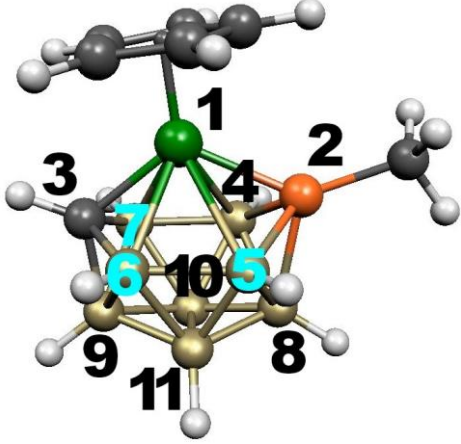 <p>3. -2080.6212890 +3.5<br/>C<sub>s</sub> H/L 2.25</p>   | <table border="1"> <thead> <tr> <th></th> <th>1</th> <th>2</th> <th>3</th> <th>4</th> <th>5</th> </tr> </thead> <tbody> <tr><td>1 Fe</td><td>0.000000</td><td></td><td></td><td></td><td></td></tr> <tr><td>2 P</td><td>2.158164</td><td>0.000000</td><td></td><td></td><td></td></tr> <tr><td>3 C</td><td>1.960771</td><td>3.517236</td><td>0.000000</td><td></td><td></td></tr> <tr><td>4 B</td><td>2.410438</td><td>1.875746</td><td>2.941886</td><td>0.000000</td><td></td></tr> <tr><td>5 B</td><td>2.409938</td><td>1.875897</td><td>2.941910</td><td>2.812553</td><td>0.000000</td></tr> <tr><td>6 B</td><td>2.267476</td><td>3.156136</td><td>1.569048</td><td>3.259948</td><td>1.807387</td></tr> <tr><td>7 B</td><td>2.268159</td><td>3.156226</td><td>1.569018</td><td>1.807520</td><td>3.260051</td></tr> <tr><td>8 B</td><td>3.235109</td><td>1.952820</td><td>3.519933</td><td>1.900840</td><td>1.900784</td></tr> <tr><td>9 B</td><td>3.103818</td><td>3.786236</td><td>1.623054</td><td>2.926223</td><td>2.926100</td></tr> <tr><td>10 B</td><td>3.272034</td><td>3.020467</td><td>2.721855</td><td>1.756281</td><td>2.864545</td></tr> <tr><td>11 B</td><td>3.271667</td><td>3.020393</td><td>2.721776</td><td>2.864357</td><td>1.756239</td></tr> <tr> <td></td> <td>6</td> <td>7</td> <td>8</td> <td>9</td> <td>10</td> </tr> <tr><td>6 B</td><td>0.000000</td><td></td><td></td><td></td><td></td></tr> <tr><td>7 B</td><td>2.617092</td><td>0.000000</td><td></td><td></td><td></td></tr> <tr><td>8 B</td><td>2.962551</td><td>2.962648</td><td>0.000000</td><td></td><td></td></tr> <tr><td>9 B</td><td>1.811160</td><td>1.811229</td><td>2.894016</td><td>0.000000</td><td></td></tr> <tr><td>10 B</td><td>2.829078</td><td>1.799544</td><td>1.733934</td><td>1.745486</td><td>0.000000</td></tr> <tr><td>11 B</td><td>1.799579</td><td>2.828903</td><td>1.733762</td><td>1.745278</td><td>1.820634</td></tr> </tbody> </table>  |          | 1        | 2        | 3        | 4 | 5 | 1 Fe | 0.000000 |  |  |  |  | 2 P | 2.158164 | 0.000000 |  |  |  | 3 C | 1.960771 | 3.517236 | 0.000000 |  |  | 4 B | 2.410438 | 1.875746 | 2.941886 | 0.000000 |  | 5 B | 2.409938 | 1.875897 | 2.941910 | 2.812553 | 0.000000 | 6 B | 2.267476 | 3.156136 | 1.569048 | 3.259948 | 1.807387 | 7 B | 2.268159 | 3.156226 | 1.569018 | 1.807520 | 3.260051 | 8 B  | 3.235109 | 1.952820 | 3.519933 | 1.900840 | 1.900784 | 9 B | 3.103818 | 3.786236 | 1.623054 | 2.926223 | 2.926100 | 10 B | 3.272034 | 3.020467 | 2.721855 | 1.756281 | 2.864545 | 11 B | 3.271667 | 3.020393 | 2.721776 | 2.864357 | 1.756239 |  | 6 | 7 | 8 | 9 | 10 | 6 B | 0.000000 |  |  |  |  | 7 B | 2.617092 | 0.000000 |  |  |  | 8 B  | 2.962551 | 2.962648 | 0.000000 |  |  | 9 B | 1.811160 | 1.811229 | 2.894016 | 0.000000 |  | 10 B | 2.829078 | 1.799544 | 1.733934 | 1.745486 | 0.000000 | 11 B | 1.799579 | 2.828903 | 1.733762 | 1.745278 | 1.820634 |
|---------------------------------------------------------------------------------------------------------------------------------------------|---------------------------------------------------------------------------------------------------------------------------------------------------------------------------------------------------------------------------------------------------------------------------------------------------------------------------------------------------------------------------------------------------------------------------------------------------------------------------------------------------------------------------------------------------------------------------------------------------------------------------------------------------------------------------------------------------------------------------------------------------------------------------------------------------------------------------------------------------------------------------------------------------------------------------------------------------------------------------------------------------------------------------------------------------------------------------------------------------------------------------------------------------------------------------------------------------------------------------------------------------------------------------------------------------------------------------------------------------------------------------------------------------------------------------------------------------------------------------------------------------------------------------------------------------------------------------------------------------------------------------------------------------------------------------------------------------------------------------------------------------------------------------------------------------------------------------------------------------------------------------------------------------------------------------------------------------------|----------|----------|----------|----------|---|---|------|----------|--|--|--|--|-----|----------|----------|--|--|--|-----|----------|----------|----------|--|--|-----|----------|----------|----------|----------|--|-----|----------|----------|----------|----------|----------|-----|----------|----------|----------|----------|----------|-----|----------|----------|----------|----------|----------|------|----------|----------|----------|----------|----------|-----|----------|----------|----------|----------|----------|------|----------|----------|----------|----------|----------|------|----------|----------|----------|----------|----------|--|---|---|---|---|----|-----|----------|--|--|--|--|-----|----------|----------|--|--|--|------|----------|----------|----------|--|--|-----|----------|----------|----------|----------|--|------|----------|----------|----------|----------|----------|------|----------|----------|----------|----------|----------|
|                                                                                                                                             | 1                                                                                                                                                                                                                                                                                                                                                                                                                                                                                                                                                                                                                                                                                                                                                                                                                                                                                                                                                                                                                                                                                                                                                                                                                                                                                                                                                                                                                                                                                                                                                                                                                                                                                                                                                                                                                                                                                                                                                       | 2        | 3        | 4        | 5        |   |   |      |          |  |  |  |  |     |          |          |  |  |  |     |          |          |          |  |  |     |          |          |          |          |  |     |          |          |          |          |          |     |          |          |          |          |          |     |          |          |          |          |          |      |          |          |          |          |          |     |          |          |          |          |          |      |          |          |          |          |          |      |          |          |          |          |          |  |   |   |   |   |    |     |          |  |  |  |  |     |          |          |  |  |  |      |          |          |          |  |  |     |          |          |          |          |  |      |          |          |          |          |          |      |          |          |          |          |          |
| 1 Fe                                                                                                                                        | 0.000000                                                                                                                                                                                                                                                                                                                                                                                                                                                                                                                                                                                                                                                                                                                                                                                                                                                                                                                                                                                                                                                                                                                                                                                                                                                                                                                                                                                                                                                                                                                                                                                                                                                                                                                                                                                                                                                                                                                                                |          |          |          |          |   |   |      |          |  |  |  |  |     |          |          |  |  |  |     |          |          |          |  |  |     |          |          |          |          |  |     |          |          |          |          |          |     |          |          |          |          |          |     |          |          |          |          |          |      |          |          |          |          |          |     |          |          |          |          |          |      |          |          |          |          |          |      |          |          |          |          |          |  |   |   |   |   |    |     |          |  |  |  |  |     |          |          |  |  |  |      |          |          |          |  |  |     |          |          |          |          |  |      |          |          |          |          |          |      |          |          |          |          |          |
| 2 P                                                                                                                                         | 2.158164                                                                                                                                                                                                                                                                                                                                                                                                                                                                                                                                                                                                                                                                                                                                                                                                                                                                                                                                                                                                                                                                                                                                                                                                                                                                                                                                                                                                                                                                                                                                                                                                                                                                                                                                                                                                                                                                                                                                                | 0.000000 |          |          |          |   |   |      |          |  |  |  |  |     |          |          |  |  |  |     |          |          |          |  |  |     |          |          |          |          |  |     |          |          |          |          |          |     |          |          |          |          |          |     |          |          |          |          |          |      |          |          |          |          |          |     |          |          |          |          |          |      |          |          |          |          |          |      |          |          |          |          |          |  |   |   |   |   |    |     |          |  |  |  |  |     |          |          |  |  |  |      |          |          |          |  |  |     |          |          |          |          |  |      |          |          |          |          |          |      |          |          |          |          |          |
| 3 C                                                                                                                                         | 1.960771                                                                                                                                                                                                                                                                                                                                                                                                                                                                                                                                                                                                                                                                                                                                                                                                                                                                                                                                                                                                                                                                                                                                                                                                                                                                                                                                                                                                                                                                                                                                                                                                                                                                                                                                                                                                                                                                                                                                                | 3.517236 | 0.000000 |          |          |   |   |      |          |  |  |  |  |     |          |          |  |  |  |     |          |          |          |  |  |     |          |          |          |          |  |     |          |          |          |          |          |     |          |          |          |          |          |     |          |          |          |          |          |      |          |          |          |          |          |     |          |          |          |          |          |      |          |          |          |          |          |      |          |          |          |          |          |  |   |   |   |   |    |     |          |  |  |  |  |     |          |          |  |  |  |      |          |          |          |  |  |     |          |          |          |          |  |      |          |          |          |          |          |      |          |          |          |          |          |
| 4 B                                                                                                                                         | 2.410438                                                                                                                                                                                                                                                                                                                                                                                                                                                                                                                                                                                                                                                                                                                                                                                                                                                                                                                                                                                                                                                                                                                                                                                                                                                                                                                                                                                                                                                                                                                                                                                                                                                                                                                                                                                                                                                                                                                                                | 1.875746 | 2.941886 | 0.000000 |          |   |   |      |          |  |  |  |  |     |          |          |  |  |  |     |          |          |          |  |  |     |          |          |          |          |  |     |          |          |          |          |          |     |          |          |          |          |          |     |          |          |          |          |          |      |          |          |          |          |          |     |          |          |          |          |          |      |          |          |          |          |          |      |          |          |          |          |          |  |   |   |   |   |    |     |          |  |  |  |  |     |          |          |  |  |  |      |          |          |          |  |  |     |          |          |          |          |  |      |          |          |          |          |          |      |          |          |          |          |          |
| 5 B                                                                                                                                         | 2.409938                                                                                                                                                                                                                                                                                                                                                                                                                                                                                                                                                                                                                                                                                                                                                                                                                                                                                                                                                                                                                                                                                                                                                                                                                                                                                                                                                                                                                                                                                                                                                                                                                                                                                                                                                                                                                                                                                                                                                | 1.875897 | 2.941910 | 2.812553 | 0.000000 |   |   |      |          |  |  |  |  |     |          |          |  |  |  |     |          |          |          |  |  |     |          |          |          |          |  |     |          |          |          |          |          |     |          |          |          |          |          |     |          |          |          |          |          |      |          |          |          |          |          |     |          |          |          |          |          |      |          |          |          |          |          |      |          |          |          |          |          |  |   |   |   |   |    |     |          |  |  |  |  |     |          |          |  |  |  |      |          |          |          |  |  |     |          |          |          |          |  |      |          |          |          |          |          |      |          |          |          |          |          |
| 6 B                                                                                                                                         | 2.267476                                                                                                                                                                                                                                                                                                                                                                                                                                                                                                                                                                                                                                                                                                                                                                                                                                                                                                                                                                                                                                                                                                                                                                                                                                                                                                                                                                                                                                                                                                                                                                                                                                                                                                                                                                                                                                                                                                                                                | 3.156136 | 1.569048 | 3.259948 | 1.807387 |   |   |      |          |  |  |  |  |     |          |          |  |  |  |     |          |          |          |  |  |     |          |          |          |          |  |     |          |          |          |          |          |     |          |          |          |          |          |     |          |          |          |          |          |      |          |          |          |          |          |     |          |          |          |          |          |      |          |          |          |          |          |      |          |          |          |          |          |  |   |   |   |   |    |     |          |  |  |  |  |     |          |          |  |  |  |      |          |          |          |  |  |     |          |          |          |          |  |      |          |          |          |          |          |      |          |          |          |          |          |
| 7 B                                                                                                                                         | 2.268159                                                                                                                                                                                                                                                                                                                                                                                                                                                                                                                                                                                                                                                                                                                                                                                                                                                                                                                                                                                                                                                                                                                                                                                                                                                                                                                                                                                                                                                                                                                                                                                                                                                                                                                                                                                                                                                                                                                                                | 3.156226 | 1.569018 | 1.807520 | 3.260051 |   |   |      |          |  |  |  |  |     |          |          |  |  |  |     |          |          |          |  |  |     |          |          |          |          |  |     |          |          |          |          |          |     |          |          |          |          |          |     |          |          |          |          |          |      |          |          |          |          |          |     |          |          |          |          |          |      |          |          |          |          |          |      |          |          |          |          |          |  |   |   |   |   |    |     |          |  |  |  |  |     |          |          |  |  |  |      |          |          |          |  |  |     |          |          |          |          |  |      |          |          |          |          |          |      |          |          |          |          |          |
| 8 B                                                                                                                                         | 3.235109                                                                                                                                                                                                                                                                                                                                                                                                                                                                                                                                                                                                                                                                                                                                                                                                                                                                                                                                                                                                                                                                                                                                                                                                                                                                                                                                                                                                                                                                                                                                                                                                                                                                                                                                                                                                                                                                                                                                                | 1.952820 | 3.519933 | 1.900840 | 1.900784 |   |   |      |          |  |  |  |  |     |          |          |  |  |  |     |          |          |          |  |  |     |          |          |          |          |  |     |          |          |          |          |          |     |          |          |          |          |          |     |          |          |          |          |          |      |          |          |          |          |          |     |          |          |          |          |          |      |          |          |          |          |          |      |          |          |          |          |          |  |   |   |   |   |    |     |          |  |  |  |  |     |          |          |  |  |  |      |          |          |          |  |  |     |          |          |          |          |  |      |          |          |          |          |          |      |          |          |          |          |          |
| 9 B                                                                                                                                         | 3.103818                                                                                                                                                                                                                                                                                                                                                                                                                                                                                                                                                                                                                                                                                                                                                                                                                                                                                                                                                                                                                                                                                                                                                                                                                                                                                                                                                                                                                                                                                                                                                                                                                                                                                                                                                                                                                                                                                                                                                | 3.786236 | 1.623054 | 2.926223 | 2.926100 |   |   |      |          |  |  |  |  |     |          |          |  |  |  |     |          |          |          |  |  |     |          |          |          |          |  |     |          |          |          |          |          |     |          |          |          |          |          |     |          |          |          |          |          |      |          |          |          |          |          |     |          |          |          |          |          |      |          |          |          |          |          |      |          |          |          |          |          |  |   |   |   |   |    |     |          |  |  |  |  |     |          |          |  |  |  |      |          |          |          |  |  |     |          |          |          |          |  |      |          |          |          |          |          |      |          |          |          |          |          |
| 10 B                                                                                                                                        | 3.272034                                                                                                                                                                                                                                                                                                                                                                                                                                                                                                                                                                                                                                                                                                                                                                                                                                                                                                                                                                                                                                                                                                                                                                                                                                                                                                                                                                                                                                                                                                                                                                                                                                                                                                                                                                                                                                                                                                                                                | 3.020467 | 2.721855 | 1.756281 | 2.864545 |   |   |      |          |  |  |  |  |     |          |          |  |  |  |     |          |          |          |  |  |     |          |          |          |          |  |     |          |          |          |          |          |     |          |          |          |          |          |     |          |          |          |          |          |      |          |          |          |          |          |     |          |          |          |          |          |      |          |          |          |          |          |      |          |          |          |          |          |  |   |   |   |   |    |     |          |  |  |  |  |     |          |          |  |  |  |      |          |          |          |  |  |     |          |          |          |          |  |      |          |          |          |          |          |      |          |          |          |          |          |
| 11 B                                                                                                                                        | 3.271667                                                                                                                                                                                                                                                                                                                                                                                                                                                                                                                                                                                                                                                                                                                                                                                                                                                                                                                                                                                                                                                                                                                                                                                                                                                                                                                                                                                                                                                                                                                                                                                                                                                                                                                                                                                                                                                                                                                                                | 3.020393 | 2.721776 | 2.864357 | 1.756239 |   |   |      |          |  |  |  |  |     |          |          |  |  |  |     |          |          |          |  |  |     |          |          |          |          |  |     |          |          |          |          |          |     |          |          |          |          |          |     |          |          |          |          |          |      |          |          |          |          |          |     |          |          |          |          |          |      |          |          |          |          |          |      |          |          |          |          |          |  |   |   |   |   |    |     |          |  |  |  |  |     |          |          |  |  |  |      |          |          |          |  |  |     |          |          |          |          |  |      |          |          |          |          |          |      |          |          |          |          |          |
|                                                                                                                                             | 6                                                                                                                                                                                                                                                                                                                                                                                                                                                                                                                                                                                                                                                                                                                                                                                                                                                                                                                                                                                                                                                                                                                                                                                                                                                                                                                                                                                                                                                                                                                                                                                                                                                                                                                                                                                                                                                                                                                                                       | 7        | 8        | 9        | 10       |   |   |      |          |  |  |  |  |     |          |          |  |  |  |     |          |          |          |  |  |     |          |          |          |          |  |     |          |          |          |          |          |     |          |          |          |          |          |     |          |          |          |          |          |      |          |          |          |          |          |     |          |          |          |          |          |      |          |          |          |          |          |      |          |          |          |          |          |  |   |   |   |   |    |     |          |  |  |  |  |     |          |          |  |  |  |      |          |          |          |  |  |     |          |          |          |          |  |      |          |          |          |          |          |      |          |          |          |          |          |
| 6 B                                                                                                                                         | 0.000000                                                                                                                                                                                                                                                                                                                                                                                                                                                                                                                                                                                                                                                                                                                                                                                                                                                                                                                                                                                                                                                                                                                                                                                                                                                                                                                                                                                                                                                                                                                                                                                                                                                                                                                                                                                                                                                                                                                                                |          |          |          |          |   |   |      |          |  |  |  |  |     |          |          |  |  |  |     |          |          |          |  |  |     |          |          |          |          |  |     |          |          |          |          |          |     |          |          |          |          |          |     |          |          |          |          |          |      |          |          |          |          |          |     |          |          |          |          |          |      |          |          |          |          |          |      |          |          |          |          |          |  |   |   |   |   |    |     |          |  |  |  |  |     |          |          |  |  |  |      |          |          |          |  |  |     |          |          |          |          |  |      |          |          |          |          |          |      |          |          |          |          |          |
| 7 B                                                                                                                                         | 2.617092                                                                                                                                                                                                                                                                                                                                                                                                                                                                                                                                                                                                                                                                                                                                                                                                                                                                                                                                                                                                                                                                                                                                                                                                                                                                                                                                                                                                                                                                                                                                                                                                                                                                                                                                                                                                                                                                                                                                                | 0.000000 |          |          |          |   |   |      |          |  |  |  |  |     |          |          |  |  |  |     |          |          |          |  |  |     |          |          |          |          |  |     |          |          |          |          |          |     |          |          |          |          |          |     |          |          |          |          |          |      |          |          |          |          |          |     |          |          |          |          |          |      |          |          |          |          |          |      |          |          |          |          |          |  |   |   |   |   |    |     |          |  |  |  |  |     |          |          |  |  |  |      |          |          |          |  |  |     |          |          |          |          |  |      |          |          |          |          |          |      |          |          |          |          |          |
| 8 B                                                                                                                                         | 2.962551                                                                                                                                                                                                                                                                                                                                                                                                                                                                                                                                                                                                                                                                                                                                                                                                                                                                                                                                                                                                                                                                                                                                                                                                                                                                                                                                                                                                                                                                                                                                                                                                                                                                                                                                                                                                                                                                                                                                                | 2.962648 | 0.000000 |          |          |   |   |      |          |  |  |  |  |     |          |          |  |  |  |     |          |          |          |  |  |     |          |          |          |          |  |     |          |          |          |          |          |     |          |          |          |          |          |     |          |          |          |          |          |      |          |          |          |          |          |     |          |          |          |          |          |      |          |          |          |          |          |      |          |          |          |          |          |  |   |   |   |   |    |     |          |  |  |  |  |     |          |          |  |  |  |      |          |          |          |  |  |     |          |          |          |          |  |      |          |          |          |          |          |      |          |          |          |          |          |
| 9 B                                                                                                                                         | 1.811160                                                                                                                                                                                                                                                                                                                                                                                                                                                                                                                                                                                                                                                                                                                                                                                                                                                                                                                                                                                                                                                                                                                                                                                                                                                                                                                                                                                                                                                                                                                                                                                                                                                                                                                                                                                                                                                                                                                                                | 1.811229 | 2.894016 | 0.000000 |          |   |   |      |          |  |  |  |  |     |          |          |  |  |  |     |          |          |          |  |  |     |          |          |          |          |  |     |          |          |          |          |          |     |          |          |          |          |          |     |          |          |          |          |          |      |          |          |          |          |          |     |          |          |          |          |          |      |          |          |          |          |          |      |          |          |          |          |          |  |   |   |   |   |    |     |          |  |  |  |  |     |          |          |  |  |  |      |          |          |          |  |  |     |          |          |          |          |  |      |          |          |          |          |          |      |          |          |          |          |          |
| 10 B                                                                                                                                        | 2.829078                                                                                                                                                                                                                                                                                                                                                                                                                                                                                                                                                                                                                                                                                                                                                                                                                                                                                                                                                                                                                                                                                                                                                                                                                                                                                                                                                                                                                                                                                                                                                                                                                                                                                                                                                                                                                                                                                                                                                | 1.799544 | 1.733934 | 1.745486 | 0.000000 |   |   |      |          |  |  |  |  |     |          |          |  |  |  |     |          |          |          |  |  |     |          |          |          |          |  |     |          |          |          |          |          |     |          |          |          |          |          |     |          |          |          |          |          |      |          |          |          |          |          |     |          |          |          |          |          |      |          |          |          |          |          |      |          |          |          |          |          |  |   |   |   |   |    |     |          |  |  |  |  |     |          |          |  |  |  |      |          |          |          |  |  |     |          |          |          |          |  |      |          |          |          |          |          |      |          |          |          |          |          |
| 11 B                                                                                                                                        | 1.799579                                                                                                                                                                                                                                                                                                                                                                                                                                                                                                                                                                                                                                                                                                                                                                                                                                                                                                                                                                                                                                                                                                                                                                                                                                                                                                                                                                                                                                                                                                                                                                                                                                                                                                                                                                                                                                                                                                                                                | 2.828903 | 1.733762 | 1.745278 | 1.820634 |   |   |      |          |  |  |  |  |     |          |          |  |  |  |     |          |          |          |  |  |     |          |          |          |          |  |     |          |          |          |          |          |     |          |          |          |          |          |     |          |          |          |          |          |      |          |          |          |          |          |     |          |          |          |          |          |      |          |          |          |          |          |      |          |          |          |          |          |  |   |   |   |   |    |     |          |  |  |  |  |     |          |          |  |  |  |      |          |          |          |  |  |     |          |          |          |          |  |      |          |          |          |          |          |      |          |          |          |          |          |
|  <p>4. -2080.6089567 +11.3<br/>C<sub>1</sub> H/L 2.18</p> | <table border="1"> <thead> <tr> <th></th> <th>1</th> <th>2</th> <th>3</th> <th>4</th> <th>5</th> </tr> </thead> <tbody> <tr><td>1 B</td><td>0.000000</td><td></td><td></td><td></td><td></td></tr> <tr><td>2 B</td><td>3.004718</td><td>0.000000</td><td></td><td></td><td></td></tr> <tr><td>3 B</td><td>1.762760</td><td>2.903654</td><td>0.000000</td><td></td><td></td></tr> <tr><td>4 P</td><td>2.049345</td><td>3.140868</td><td>2.811905</td><td>0.000000</td><td></td></tr> <tr><td>5 B</td><td>3.107186</td><td>1.795992</td><td>3.214663</td><td>2.029593</td><td>0.000000</td></tr> <tr><td>6 B</td><td>2.794037</td><td>2.677061</td><td>1.887692</td><td>2.295541</td><td>2.089397</td></tr> <tr><td>7 C</td><td>3.502155</td><td>1.664022</td><td>2.782532</td><td>3.052353</td><td>1.570397</td></tr> <tr><td>8 Fe</td><td>2.118779</td><td>2.066518</td><td>3.218295</td><td>2.111403</td><td>2.081872</td></tr> <tr><td>9 B</td><td>1.876450</td><td>3.676080</td><td>1.669249</td><td>1.841416</td><td>3.108584</td></tr> <tr><td>10 B</td><td>1.746440</td><td>1.768543</td><td>1.784841</td><td>3.019227</td><td>2.849092</td></tr> <tr><td>11 B</td><td>2.934893</td><td>1.787118</td><td>1.793329</td><td>3.459289</td><td>2.670746</td></tr> <tr> <td></td> <td>6</td> <td>7</td> <td>8</td> <td>9</td> <td>10</td> </tr> <tr><td>6 B</td><td>0.000000</td><td></td><td></td><td></td><td></td></tr> <tr><td>7 C</td><td>1.600094</td><td>0.000000</td><td></td><td></td><td></td></tr> <tr><td>8 Fe</td><td>3.279996</td><td>3.109723</td><td>0.000000</td><td></td><td></td></tr> <tr><td>9 B</td><td>1.824443</td><td>3.251278</td><td>3.305141</td><td>0.000000</td><td></td></tr> <tr><td>10 B</td><td>2.767538</td><td>2.710645</td><td>2.130808</td><td>2.932038</td><td>0.000000</td></tr> <tr><td>11 B</td><td>1.917346</td><td>1.579748</td><td>3.245909</td><td>3.032082</td><td>1.764894</td></tr> </tbody> </table> |          | 1        | 2        | 3        | 4 | 5 | 1 B  | 0.000000 |  |  |  |  | 2 B | 3.004718 | 0.000000 |  |  |  | 3 B | 1.762760 | 2.903654 | 0.000000 |  |  | 4 P | 2.049345 | 3.140868 | 2.811905 | 0.000000 |  | 5 B | 3.107186 | 1.795992 | 3.214663 | 2.029593 | 0.000000 | 6 B | 2.794037 | 2.677061 | 1.887692 | 2.295541 | 2.089397 | 7 C | 3.502155 | 1.664022 | 2.782532 | 3.052353 | 1.570397 | 8 Fe | 2.118779 | 2.066518 | 3.218295 | 2.111403 | 2.081872 | 9 B | 1.876450 | 3.676080 | 1.669249 | 1.841416 | 3.108584 | 10 B | 1.746440 | 1.768543 | 1.784841 | 3.019227 | 2.849092 | 11 B | 2.934893 | 1.787118 | 1.793329 | 3.459289 | 2.670746 |  | 6 | 7 | 8 | 9 | 10 | 6 B | 0.000000 |  |  |  |  | 7 C | 1.600094 | 0.000000 |  |  |  | 8 Fe | 3.279996 | 3.109723 | 0.000000 |  |  | 9 B | 1.824443 | 3.251278 | 3.305141 | 0.000000 |  | 10 B | 2.767538 | 2.710645 | 2.130808 | 2.932038 | 0.000000 | 11 B | 1.917346 | 1.579748 | 3.245909 | 3.032082 | 1.764894 |
|                                                                                                                                             | 1                                                                                                                                                                                                                                                                                                                                                                                                                                                                                                                                                                                                                                                                                                                                                                                                                                                                                                                                                                                                                                                                                                                                                                                                                                                                                                                                                                                                                                                                                                                                                                                                                                                                                                                                                                                                                                                                                                                                                       | 2        | 3        | 4        | 5        |   |   |      |          |  |  |  |  |     |          |          |  |  |  |     |          |          |          |  |  |     |          |          |          |          |  |     |          |          |          |          |          |     |          |          |          |          |          |     |          |          |          |          |          |      |          |          |          |          |          |     |          |          |          |          |          |      |          |          |          |          |          |      |          |          |          |          |          |  |   |   |   |   |    |     |          |  |  |  |  |     |          |          |  |  |  |      |          |          |          |  |  |     |          |          |          |          |  |      |          |          |          |          |          |      |          |          |          |          |          |
| 1 B                                                                                                                                         | 0.000000                                                                                                                                                                                                                                                                                                                                                                                                                                                                                                                                                                                                                                                                                                                                                                                                                                                                                                                                                                                                                                                                                                                                                                                                                                                                                                                                                                                                                                                                                                                                                                                                                                                                                                                                                                                                                                                                                                                                                |          |          |          |          |   |   |      |          |  |  |  |  |     |          |          |  |  |  |     |          |          |          |  |  |     |          |          |          |          |  |     |          |          |          |          |          |     |          |          |          |          |          |     |          |          |          |          |          |      |          |          |          |          |          |     |          |          |          |          |          |      |          |          |          |          |          |      |          |          |          |          |          |  |   |   |   |   |    |     |          |  |  |  |  |     |          |          |  |  |  |      |          |          |          |  |  |     |          |          |          |          |  |      |          |          |          |          |          |      |          |          |          |          |          |
| 2 B                                                                                                                                         | 3.004718                                                                                                                                                                                                                                                                                                                                                                                                                                                                                                                                                                                                                                                                                                                                                                                                                                                                                                                                                                                                                                                                                                                                                                                                                                                                                                                                                                                                                                                                                                                                                                                                                                                                                                                                                                                                                                                                                                                                                | 0.000000 |          |          |          |   |   |      |          |  |  |  |  |     |          |          |  |  |  |     |          |          |          |  |  |     |          |          |          |          |  |     |          |          |          |          |          |     |          |          |          |          |          |     |          |          |          |          |          |      |          |          |          |          |          |     |          |          |          |          |          |      |          |          |          |          |          |      |          |          |          |          |          |  |   |   |   |   |    |     |          |  |  |  |  |     |          |          |  |  |  |      |          |          |          |  |  |     |          |          |          |          |  |      |          |          |          |          |          |      |          |          |          |          |          |
| 3 B                                                                                                                                         | 1.762760                                                                                                                                                                                                                                                                                                                                                                                                                                                                                                                                                                                                                                                                                                                                                                                                                                                                                                                                                                                                                                                                                                                                                                                                                                                                                                                                                                                                                                                                                                                                                                                                                                                                                                                                                                                                                                                                                                                                                | 2.903654 | 0.000000 |          |          |   |   |      |          |  |  |  |  |     |          |          |  |  |  |     |          |          |          |  |  |     |          |          |          |          |  |     |          |          |          |          |          |     |          |          |          |          |          |     |          |          |          |          |          |      |          |          |          |          |          |     |          |          |          |          |          |      |          |          |          |          |          |      |          |          |          |          |          |  |   |   |   |   |    |     |          |  |  |  |  |     |          |          |  |  |  |      |          |          |          |  |  |     |          |          |          |          |  |      |          |          |          |          |          |      |          |          |          |          |          |
| 4 P                                                                                                                                         | 2.049345                                                                                                                                                                                                                                                                                                                                                                                                                                                                                                                                                                                                                                                                                                                                                                                                                                                                                                                                                                                                                                                                                                                                                                                                                                                                                                                                                                                                                                                                                                                                                                                                                                                                                                                                                                                                                                                                                                                                                | 3.140868 | 2.811905 | 0.000000 |          |   |   |      |          |  |  |  |  |     |          |          |  |  |  |     |          |          |          |  |  |     |          |          |          |          |  |     |          |          |          |          |          |     |          |          |          |          |          |     |          |          |          |          |          |      |          |          |          |          |          |     |          |          |          |          |          |      |          |          |          |          |          |      |          |          |          |          |          |  |   |   |   |   |    |     |          |  |  |  |  |     |          |          |  |  |  |      |          |          |          |  |  |     |          |          |          |          |  |      |          |          |          |          |          |      |          |          |          |          |          |
| 5 B                                                                                                                                         | 3.107186                                                                                                                                                                                                                                                                                                                                                                                                                                                                                                                                                                                                                                                                                                                                                                                                                                                                                                                                                                                                                                                                                                                                                                                                                                                                                                                                                                                                                                                                                                                                                                                                                                                                                                                                                                                                                                                                                                                                                | 1.795992 | 3.214663 | 2.029593 | 0.000000 |   |   |      |          |  |  |  |  |     |          |          |  |  |  |     |          |          |          |  |  |     |          |          |          |          |  |     |          |          |          |          |          |     |          |          |          |          |          |     |          |          |          |          |          |      |          |          |          |          |          |     |          |          |          |          |          |      |          |          |          |          |          |      |          |          |          |          |          |  |   |   |   |   |    |     |          |  |  |  |  |     |          |          |  |  |  |      |          |          |          |  |  |     |          |          |          |          |  |      |          |          |          |          |          |      |          |          |          |          |          |
| 6 B                                                                                                                                         | 2.794037                                                                                                                                                                                                                                                                                                                                                                                                                                                                                                                                                                                                                                                                                                                                                                                                                                                                                                                                                                                                                                                                                                                                                                                                                                                                                                                                                                                                                                                                                                                                                                                                                                                                                                                                                                                                                                                                                                                                                | 2.677061 | 1.887692 | 2.295541 | 2.089397 |   |   |      |          |  |  |  |  |     |          |          |  |  |  |     |          |          |          |  |  |     |          |          |          |          |  |     |          |          |          |          |          |     |          |          |          |          |          |     |          |          |          |          |          |      |          |          |          |          |          |     |          |          |          |          |          |      |          |          |          |          |          |      |          |          |          |          |          |  |   |   |   |   |    |     |          |  |  |  |  |     |          |          |  |  |  |      |          |          |          |  |  |     |          |          |          |          |  |      |          |          |          |          |          |      |          |          |          |          |          |
| 7 C                                                                                                                                         | 3.502155                                                                                                                                                                                                                                                                                                                                                                                                                                                                                                                                                                                                                                                                                                                                                                                                                                                                                                                                                                                                                                                                                                                                                                                                                                                                                                                                                                                                                                                                                                                                                                                                                                                                                                                                                                                                                                                                                                                                                | 1.664022 | 2.782532 | 3.052353 | 1.570397 |   |   |      |          |  |  |  |  |     |          |          |  |  |  |     |          |          |          |  |  |     |          |          |          |          |  |     |          |          |          |          |          |     |          |          |          |          |          |     |          |          |          |          |          |      |          |          |          |          |          |     |          |          |          |          |          |      |          |          |          |          |          |      |          |          |          |          |          |  |   |   |   |   |    |     |          |  |  |  |  |     |          |          |  |  |  |      |          |          |          |  |  |     |          |          |          |          |  |      |          |          |          |          |          |      |          |          |          |          |          |
| 8 Fe                                                                                                                                        | 2.118779                                                                                                                                                                                                                                                                                                                                                                                                                                                                                                                                                                                                                                                                                                                                                                                                                                                                                                                                                                                                                                                                                                                                                                                                                                                                                                                                                                                                                                                                                                                                                                                                                                                                                                                                                                                                                                                                                                                                                | 2.066518 | 3.218295 | 2.111403 | 2.081872 |   |   |      |          |  |  |  |  |     |          |          |  |  |  |     |          |          |          |  |  |     |          |          |          |          |  |     |          |          |          |          |          |     |          |          |          |          |          |     |          |          |          |          |          |      |          |          |          |          |          |     |          |          |          |          |          |      |          |          |          |          |          |      |          |          |          |          |          |  |   |   |   |   |    |     |          |  |  |  |  |     |          |          |  |  |  |      |          |          |          |  |  |     |          |          |          |          |  |      |          |          |          |          |          |      |          |          |          |          |          |
| 9 B                                                                                                                                         | 1.876450                                                                                                                                                                                                                                                                                                                                                                                                                                                                                                                                                                                                                                                                                                                                                                                                                                                                                                                                                                                                                                                                                                                                                                                                                                                                                                                                                                                                                                                                                                                                                                                                                                                                                                                                                                                                                                                                                                                                                | 3.676080 | 1.669249 | 1.841416 | 3.108584 |   |   |      |          |  |  |  |  |     |          |          |  |  |  |     |          |          |          |  |  |     |          |          |          |          |  |     |          |          |          |          |          |     |          |          |          |          |          |     |          |          |          |          |          |      |          |          |          |          |          |     |          |          |          |          |          |      |          |          |          |          |          |      |          |          |          |          |          |  |   |   |   |   |    |     |          |  |  |  |  |     |          |          |  |  |  |      |          |          |          |  |  |     |          |          |          |          |  |      |          |          |          |          |          |      |          |          |          |          |          |
| 10 B                                                                                                                                        | 1.746440                                                                                                                                                                                                                                                                                                                                                                                                                                                                                                                                                                                                                                                                                                                                                                                                                                                                                                                                                                                                                                                                                                                                                                                                                                                                                                                                                                                                                                                                                                                                                                                                                                                                                                                                                                                                                                                                                                                                                | 1.768543 | 1.784841 | 3.019227 | 2.849092 |   |   |      |          |  |  |  |  |     |          |          |  |  |  |     |          |          |          |  |  |     |          |          |          |          |  |     |          |          |          |          |          |     |          |          |          |          |          |     |          |          |          |          |          |      |          |          |          |          |          |     |          |          |          |          |          |      |          |          |          |          |          |      |          |          |          |          |          |  |   |   |   |   |    |     |          |  |  |  |  |     |          |          |  |  |  |      |          |          |          |  |  |     |          |          |          |          |  |      |          |          |          |          |          |      |          |          |          |          |          |
| 11 B                                                                                                                                        | 2.934893                                                                                                                                                                                                                                                                                                                                                                                                                                                                                                                                                                                                                                                                                                                                                                                                                                                                                                                                                                                                                                                                                                                                                                                                                                                                                                                                                                                                                                                                                                                                                                                                                                                                                                                                                                                                                                                                                                                                                | 1.787118 | 1.793329 | 3.459289 | 2.670746 |   |   |      |          |  |  |  |  |     |          |          |  |  |  |     |          |          |          |  |  |     |          |          |          |          |  |     |          |          |          |          |          |     |          |          |          |          |          |     |          |          |          |          |          |      |          |          |          |          |          |     |          |          |          |          |          |      |          |          |          |          |          |      |          |          |          |          |          |  |   |   |   |   |    |     |          |  |  |  |  |     |          |          |  |  |  |      |          |          |          |  |  |     |          |          |          |          |  |      |          |          |          |          |          |      |          |          |          |          |          |
|                                                                                                                                             | 6                                                                                                                                                                                                                                                                                                                                                                                                                                                                                                                                                                                                                                                                                                                                                                                                                                                                                                                                                                                                                                                                                                                                                                                                                                                                                                                                                                                                                                                                                                                                                                                                                                                                                                                                                                                                                                                                                                                                                       | 7        | 8        | 9        | 10       |   |   |      |          |  |  |  |  |     |          |          |  |  |  |     |          |          |          |  |  |     |          |          |          |          |  |     |          |          |          |          |          |     |          |          |          |          |          |     |          |          |          |          |          |      |          |          |          |          |          |     |          |          |          |          |          |      |          |          |          |          |          |      |          |          |          |          |          |  |   |   |   |   |    |     |          |  |  |  |  |     |          |          |  |  |  |      |          |          |          |  |  |     |          |          |          |          |  |      |          |          |          |          |          |      |          |          |          |          |          |
| 6 B                                                                                                                                         | 0.000000                                                                                                                                                                                                                                                                                                                                                                                                                                                                                                                                                                                                                                                                                                                                                                                                                                                                                                                                                                                                                                                                                                                                                                                                                                                                                                                                                                                                                                                                                                                                                                                                                                                                                                                                                                                                                                                                                                                                                |          |          |          |          |   |   |      |          |  |  |  |  |     |          |          |  |  |  |     |          |          |          |  |  |     |          |          |          |          |  |     |          |          |          |          |          |     |          |          |          |          |          |     |          |          |          |          |          |      |          |          |          |          |          |     |          |          |          |          |          |      |          |          |          |          |          |      |          |          |          |          |          |  |   |   |   |   |    |     |          |  |  |  |  |     |          |          |  |  |  |      |          |          |          |  |  |     |          |          |          |          |  |      |          |          |          |          |          |      |          |          |          |          |          |
| 7 C                                                                                                                                         | 1.600094                                                                                                                                                                                                                                                                                                                                                                                                                                                                                                                                                                                                                                                                                                                                                                                                                                                                                                                                                                                                                                                                                                                                                                                                                                                                                                                                                                                                                                                                                                                                                                                                                                                                                                                                                                                                                                                                                                                                                | 0.000000 |          |          |          |   |   |      |          |  |  |  |  |     |          |          |  |  |  |     |          |          |          |  |  |     |          |          |          |          |  |     |          |          |          |          |          |     |          |          |          |          |          |     |          |          |          |          |          |      |          |          |          |          |          |     |          |          |          |          |          |      |          |          |          |          |          |      |          |          |          |          |          |  |   |   |   |   |    |     |          |  |  |  |  |     |          |          |  |  |  |      |          |          |          |  |  |     |          |          |          |          |  |      |          |          |          |          |          |      |          |          |          |          |          |
| 8 Fe                                                                                                                                        | 3.279996                                                                                                                                                                                                                                                                                                                                                                                                                                                                                                                                                                                                                                                                                                                                                                                                                                                                                                                                                                                                                                                                                                                                                                                                                                                                                                                                                                                                                                                                                                                                                                                                                                                                                                                                                                                                                                                                                                                                                | 3.109723 | 0.000000 |          |          |   |   |      |          |  |  |  |  |     |          |          |  |  |  |     |          |          |          |  |  |     |          |          |          |          |  |     |          |          |          |          |          |     |          |          |          |          |          |     |          |          |          |          |          |      |          |          |          |          |          |     |          |          |          |          |          |      |          |          |          |          |          |      |          |          |          |          |          |  |   |   |   |   |    |     |          |  |  |  |  |     |          |          |  |  |  |      |          |          |          |  |  |     |          |          |          |          |  |      |          |          |          |          |          |      |          |          |          |          |          |
| 9 B                                                                                                                                         | 1.824443                                                                                                                                                                                                                                                                                                                                                                                                                                                                                                                                                                                                                                                                                                                                                                                                                                                                                                                                                                                                                                                                                                                                                                                                                                                                                                                                                                                                                                                                                                                                                                                                                                                                                                                                                                                                                                                                                                                                                | 3.251278 | 3.305141 | 0.000000 |          |   |   |      |          |  |  |  |  |     |          |          |  |  |  |     |          |          |          |  |  |     |          |          |          |          |  |     |          |          |          |          |          |     |          |          |          |          |          |     |          |          |          |          |          |      |          |          |          |          |          |     |          |          |          |          |          |      |          |          |          |          |          |      |          |          |          |          |          |  |   |   |   |   |    |     |          |  |  |  |  |     |          |          |  |  |  |      |          |          |          |  |  |     |          |          |          |          |  |      |          |          |          |          |          |      |          |          |          |          |          |
| 10 B                                                                                                                                        | 2.767538                                                                                                                                                                                                                                                                                                                                                                                                                                                                                                                                                                                                                                                                                                                                                                                                                                                                                                                                                                                                                                                                                                                                                                                                                                                                                                                                                                                                                                                                                                                                                                                                                                                                                                                                                                                                                                                                                                                                                | 2.710645 | 2.130808 | 2.932038 | 0.000000 |   |   |      |          |  |  |  |  |     |          |          |  |  |  |     |          |          |          |  |  |     |          |          |          |          |  |     |          |          |          |          |          |     |          |          |          |          |          |     |          |          |          |          |          |      |          |          |          |          |          |     |          |          |          |          |          |      |          |          |          |          |          |      |          |          |          |          |          |  |   |   |   |   |    |     |          |  |  |  |  |     |          |          |  |  |  |      |          |          |          |  |  |     |          |          |          |          |  |      |          |          |          |          |          |      |          |          |          |          |          |
| 11 B                                                                                                                                        | 1.917346                                                                                                                                                                                                                                                                                                                                                                                                                                                                                                                                                                                                                                                                                                                                                                                                                                                                                                                                                                                                                                                                                                                                                                                                                                                                                                                                                                                                                                                                                                                                                                                                                                                                                                                                                                                                                                                                                                                                                | 1.579748 | 3.245909 | 3.032082 | 1.764894 |   |   |      |          |  |  |  |  |     |          |          |  |  |  |     |          |          |          |  |  |     |          |          |          |          |  |     |          |          |          |          |          |     |          |          |          |          |          |     |          |          |          |          |          |      |          |          |          |          |          |     |          |          |          |          |          |      |          |          |          |          |          |      |          |          |          |          |          |  |   |   |   |   |    |     |          |  |  |  |  |     |          |          |  |  |  |      |          |          |          |  |  |     |          |          |          |          |  |      |          |          |          |          |          |      |          |          |          |          |          |

| 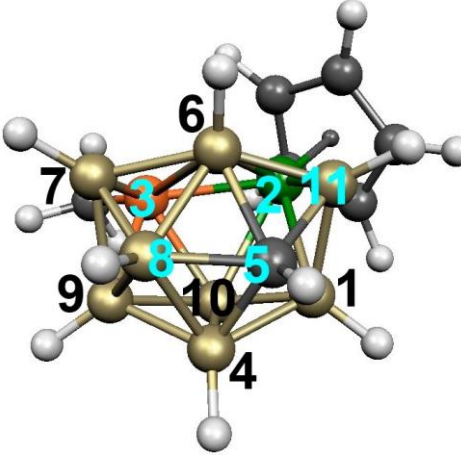 <p>5. -2080.6073424 +12.3<br/>C<sub>1</sub> H/L 2.73</p>  | <table border="1"> <thead> <tr> <th></th> <th>1</th> <th>2</th> <th>3</th> <th>4</th> <th>5</th> </tr> </thead> <tbody> <tr><td>1 B</td><td>0.000000</td><td></td><td></td><td></td><td></td></tr> <tr><td>2 Fe</td><td>2.116144</td><td>0.000000</td><td></td><td></td><td></td></tr> <tr><td>3 P</td><td>3.150008</td><td>2.129706</td><td>0.000000</td><td></td><td></td></tr> <tr><td>4 B</td><td>1.765357</td><td>3.224731</td><td>3.054736</td><td>0.000000</td><td></td></tr> <tr><td>5 C</td><td>1.698622</td><td>2.908928</td><td>3.404789</td><td>1.672869</td><td>0.000000</td></tr> <tr><td>6 B</td><td>2.631401</td><td>2.292298</td><td>2.465556</td><td>2.766902</td><td>1.797569</td></tr> <tr><td>7 B</td><td>3.607278</td><td>3.196298</td><td>1.840170</td><td>2.935811</td><td>2.922096</td></tr> <tr><td>8 B</td><td>2.845598</td><td>3.475862</td><td>2.861149</td><td>1.778316</td><td>1.679170</td></tr> <tr><td>9 B</td><td>2.950563</td><td>3.330187</td><td>2.011133</td><td>1.736787</td><td>2.777253</td></tr> <tr><td>10 B</td><td>1.745062</td><td>2.149008</td><td>1.972283</td><td>1.773440</td><td>2.691477</td></tr> <tr><td>11 B</td><td>1.750304</td><td>1.944675</td><td>3.348895</td><td>2.871084</td><td>1.621699</td></tr> <tr> <th></th> <th>6</th> <th>7</th> <th>8</th> <th>9</th> <th>10</th> </tr> <tr><td>6 B</td><td>0.000000</td><td></td><td></td><td></td><td></td></tr> <tr><td>7 B</td><td>1.833607</td><td>0.000000</td><td></td><td></td><td></td></tr> <tr><td>8 B</td><td>1.836856</td><td>1.697435</td><td>0.000000</td><td></td><td></td></tr> <tr><td>9 B</td><td>2.775032</td><td>1.843738</td><td>1.745317</td><td>0.000000</td><td></td></tr> <tr><td>10 B</td><td>2.924731</td><td>2.961383</td><td>2.796553</td><td>1.858198</td><td>0.000000</td></tr> <tr><td>11 B</td><td>1.706643</td><td>3.392678</td><td>2.886967</td><td>3.661285</td><td>2.949479</td></tr> </tbody> </table> |          | 1        | 2        | 3        | 4 | 5 | 1 B | 0.000000 |  |  |  |  | 2 Fe | 2.116144 | 0.000000 |  |  |  | 3 P | 3.150008 | 2.129706 | 0.000000 |  |  | 4 B | 1.765357 | 3.224731 | 3.054736 | 0.000000 |  | 5 C  | 1.698622 | 2.908928 | 3.404789 | 1.672869 | 0.000000 | 6 B | 2.631401 | 2.292298 | 2.465556 | 2.766902 | 1.797569 | 7 B | 3.607278 | 3.196298 | 1.840170 | 2.935811 | 2.922096 | 8 B | 2.845598 | 3.475862 | 2.861149 | 1.778316 | 1.679170 | 9 B | 2.950563 | 3.330187 | 2.011133 | 1.736787 | 2.777253 | 10 B | 1.745062 | 2.149008 | 1.972283 | 1.773440 | 2.691477 | 11 B | 1.750304 | 1.944675 | 3.348895 | 2.871084 | 1.621699 |  | 6 | 7 | 8 | 9 | 10 | 6 B | 0.000000 |  |  |  |  | 7 B | 1.833607 | 0.000000 |  |  |  | 8 B | 1.836856 | 1.697435 | 0.000000 |  |  | 9 B | 2.775032 | 1.843738 | 1.745317 | 0.000000 |  | 10 B | 2.924731 | 2.961383 | 2.796553 | 1.858198 | 0.000000 | 11 B | 1.706643 | 3.392678 | 2.886967 | 3.661285 | 2.949479 |
|---------------------------------------------------------------------------------------------------------------------------------------------|--------------------------------------------------------------------------------------------------------------------------------------------------------------------------------------------------------------------------------------------------------------------------------------------------------------------------------------------------------------------------------------------------------------------------------------------------------------------------------------------------------------------------------------------------------------------------------------------------------------------------------------------------------------------------------------------------------------------------------------------------------------------------------------------------------------------------------------------------------------------------------------------------------------------------------------------------------------------------------------------------------------------------------------------------------------------------------------------------------------------------------------------------------------------------------------------------------------------------------------------------------------------------------------------------------------------------------------------------------------------------------------------------------------------------------------------------------------------------------------------------------------------------------------------------------------------------------------------------------------------------------------------------------------------------------------------------------------------------------------------------------------------------------------------------------------------------------------------------------------------------------------------------------------------------------------------------------|----------|----------|----------|----------|---|---|-----|----------|--|--|--|--|------|----------|----------|--|--|--|-----|----------|----------|----------|--|--|-----|----------|----------|----------|----------|--|------|----------|----------|----------|----------|----------|-----|----------|----------|----------|----------|----------|-----|----------|----------|----------|----------|----------|-----|----------|----------|----------|----------|----------|-----|----------|----------|----------|----------|----------|------|----------|----------|----------|----------|----------|------|----------|----------|----------|----------|----------|--|---|---|---|---|----|-----|----------|--|--|--|--|-----|----------|----------|--|--|--|-----|----------|----------|----------|--|--|-----|----------|----------|----------|----------|--|------|----------|----------|----------|----------|----------|------|----------|----------|----------|----------|----------|
|                                                                                                                                             | 1                                                                                                                                                                                                                                                                                                                                                                                                                                                                                                                                                                                                                                                                                                                                                                                                                                                                                                                                                                                                                                                                                                                                                                                                                                                                                                                                                                                                                                                                                                                                                                                                                                                                                                                                                                                                                                                                                                                                                      | 2        | 3        | 4        | 5        |   |   |     |          |  |  |  |  |      |          |          |  |  |  |     |          |          |          |  |  |     |          |          |          |          |  |      |          |          |          |          |          |     |          |          |          |          |          |     |          |          |          |          |          |     |          |          |          |          |          |     |          |          |          |          |          |      |          |          |          |          |          |      |          |          |          |          |          |  |   |   |   |   |    |     |          |  |  |  |  |     |          |          |  |  |  |     |          |          |          |  |  |     |          |          |          |          |  |      |          |          |          |          |          |      |          |          |          |          |          |
| 1 B                                                                                                                                         | 0.000000                                                                                                                                                                                                                                                                                                                                                                                                                                                                                                                                                                                                                                                                                                                                                                                                                                                                                                                                                                                                                                                                                                                                                                                                                                                                                                                                                                                                                                                                                                                                                                                                                                                                                                                                                                                                                                                                                                                                               |          |          |          |          |   |   |     |          |  |  |  |  |      |          |          |  |  |  |     |          |          |          |  |  |     |          |          |          |          |  |      |          |          |          |          |          |     |          |          |          |          |          |     |          |          |          |          |          |     |          |          |          |          |          |     |          |          |          |          |          |      |          |          |          |          |          |      |          |          |          |          |          |  |   |   |   |   |    |     |          |  |  |  |  |     |          |          |  |  |  |     |          |          |          |  |  |     |          |          |          |          |  |      |          |          |          |          |          |      |          |          |          |          |          |
| 2 Fe                                                                                                                                        | 2.116144                                                                                                                                                                                                                                                                                                                                                                                                                                                                                                                                                                                                                                                                                                                                                                                                                                                                                                                                                                                                                                                                                                                                                                                                                                                                                                                                                                                                                                                                                                                                                                                                                                                                                                                                                                                                                                                                                                                                               | 0.000000 |          |          |          |   |   |     |          |  |  |  |  |      |          |          |  |  |  |     |          |          |          |  |  |     |          |          |          |          |  |      |          |          |          |          |          |     |          |          |          |          |          |     |          |          |          |          |          |     |          |          |          |          |          |     |          |          |          |          |          |      |          |          |          |          |          |      |          |          |          |          |          |  |   |   |   |   |    |     |          |  |  |  |  |     |          |          |  |  |  |     |          |          |          |  |  |     |          |          |          |          |  |      |          |          |          |          |          |      |          |          |          |          |          |
| 3 P                                                                                                                                         | 3.150008                                                                                                                                                                                                                                                                                                                                                                                                                                                                                                                                                                                                                                                                                                                                                                                                                                                                                                                                                                                                                                                                                                                                                                                                                                                                                                                                                                                                                                                                                                                                                                                                                                                                                                                                                                                                                                                                                                                                               | 2.129706 | 0.000000 |          |          |   |   |     |          |  |  |  |  |      |          |          |  |  |  |     |          |          |          |  |  |     |          |          |          |          |  |      |          |          |          |          |          |     |          |          |          |          |          |     |          |          |          |          |          |     |          |          |          |          |          |     |          |          |          |          |          |      |          |          |          |          |          |      |          |          |          |          |          |  |   |   |   |   |    |     |          |  |  |  |  |     |          |          |  |  |  |     |          |          |          |  |  |     |          |          |          |          |  |      |          |          |          |          |          |      |          |          |          |          |          |
| 4 B                                                                                                                                         | 1.765357                                                                                                                                                                                                                                                                                                                                                                                                                                                                                                                                                                                                                                                                                                                                                                                                                                                                                                                                                                                                                                                                                                                                                                                                                                                                                                                                                                                                                                                                                                                                                                                                                                                                                                                                                                                                                                                                                                                                               | 3.224731 | 3.054736 | 0.000000 |          |   |   |     |          |  |  |  |  |      |          |          |  |  |  |     |          |          |          |  |  |     |          |          |          |          |  |      |          |          |          |          |          |     |          |          |          |          |          |     |          |          |          |          |          |     |          |          |          |          |          |     |          |          |          |          |          |      |          |          |          |          |          |      |          |          |          |          |          |  |   |   |   |   |    |     |          |  |  |  |  |     |          |          |  |  |  |     |          |          |          |  |  |     |          |          |          |          |  |      |          |          |          |          |          |      |          |          |          |          |          |
| 5 C                                                                                                                                         | 1.698622                                                                                                                                                                                                                                                                                                                                                                                                                                                                                                                                                                                                                                                                                                                                                                                                                                                                                                                                                                                                                                                                                                                                                                                                                                                                                                                                                                                                                                                                                                                                                                                                                                                                                                                                                                                                                                                                                                                                               | 2.908928 | 3.404789 | 1.672869 | 0.000000 |   |   |     |          |  |  |  |  |      |          |          |  |  |  |     |          |          |          |  |  |     |          |          |          |          |  |      |          |          |          |          |          |     |          |          |          |          |          |     |          |          |          |          |          |     |          |          |          |          |          |     |          |          |          |          |          |      |          |          |          |          |          |      |          |          |          |          |          |  |   |   |   |   |    |     |          |  |  |  |  |     |          |          |  |  |  |     |          |          |          |  |  |     |          |          |          |          |  |      |          |          |          |          |          |      |          |          |          |          |          |
| 6 B                                                                                                                                         | 2.631401                                                                                                                                                                                                                                                                                                                                                                                                                                                                                                                                                                                                                                                                                                                                                                                                                                                                                                                                                                                                                                                                                                                                                                                                                                                                                                                                                                                                                                                                                                                                                                                                                                                                                                                                                                                                                                                                                                                                               | 2.292298 | 2.465556 | 2.766902 | 1.797569 |   |   |     |          |  |  |  |  |      |          |          |  |  |  |     |          |          |          |  |  |     |          |          |          |          |  |      |          |          |          |          |          |     |          |          |          |          |          |     |          |          |          |          |          |     |          |          |          |          |          |     |          |          |          |          |          |      |          |          |          |          |          |      |          |          |          |          |          |  |   |   |   |   |    |     |          |  |  |  |  |     |          |          |  |  |  |     |          |          |          |  |  |     |          |          |          |          |  |      |          |          |          |          |          |      |          |          |          |          |          |
| 7 B                                                                                                                                         | 3.607278                                                                                                                                                                                                                                                                                                                                                                                                                                                                                                                                                                                                                                                                                                                                                                                                                                                                                                                                                                                                                                                                                                                                                                                                                                                                                                                                                                                                                                                                                                                                                                                                                                                                                                                                                                                                                                                                                                                                               | 3.196298 | 1.840170 | 2.935811 | 2.922096 |   |   |     |          |  |  |  |  |      |          |          |  |  |  |     |          |          |          |  |  |     |          |          |          |          |  |      |          |          |          |          |          |     |          |          |          |          |          |     |          |          |          |          |          |     |          |          |          |          |          |     |          |          |          |          |          |      |          |          |          |          |          |      |          |          |          |          |          |  |   |   |   |   |    |     |          |  |  |  |  |     |          |          |  |  |  |     |          |          |          |  |  |     |          |          |          |          |  |      |          |          |          |          |          |      |          |          |          |          |          |
| 8 B                                                                                                                                         | 2.845598                                                                                                                                                                                                                                                                                                                                                                                                                                                                                                                                                                                                                                                                                                                                                                                                                                                                                                                                                                                                                                                                                                                                                                                                                                                                                                                                                                                                                                                                                                                                                                                                                                                                                                                                                                                                                                                                                                                                               | 3.475862 | 2.861149 | 1.778316 | 1.679170 |   |   |     |          |  |  |  |  |      |          |          |  |  |  |     |          |          |          |  |  |     |          |          |          |          |  |      |          |          |          |          |          |     |          |          |          |          |          |     |          |          |          |          |          |     |          |          |          |          |          |     |          |          |          |          |          |      |          |          |          |          |          |      |          |          |          |          |          |  |   |   |   |   |    |     |          |  |  |  |  |     |          |          |  |  |  |     |          |          |          |  |  |     |          |          |          |          |  |      |          |          |          |          |          |      |          |          |          |          |          |
| 9 B                                                                                                                                         | 2.950563                                                                                                                                                                                                                                                                                                                                                                                                                                                                                                                                                                                                                                                                                                                                                                                                                                                                                                                                                                                                                                                                                                                                                                                                                                                                                                                                                                                                                                                                                                                                                                                                                                                                                                                                                                                                                                                                                                                                               | 3.330187 | 2.011133 | 1.736787 | 2.777253 |   |   |     |          |  |  |  |  |      |          |          |  |  |  |     |          |          |          |  |  |     |          |          |          |          |  |      |          |          |          |          |          |     |          |          |          |          |          |     |          |          |          |          |          |     |          |          |          |          |          |     |          |          |          |          |          |      |          |          |          |          |          |      |          |          |          |          |          |  |   |   |   |   |    |     |          |  |  |  |  |     |          |          |  |  |  |     |          |          |          |  |  |     |          |          |          |          |  |      |          |          |          |          |          |      |          |          |          |          |          |
| 10 B                                                                                                                                        | 1.745062                                                                                                                                                                                                                                                                                                                                                                                                                                                                                                                                                                                                                                                                                                                                                                                                                                                                                                                                                                                                                                                                                                                                                                                                                                                                                                                                                                                                                                                                                                                                                                                                                                                                                                                                                                                                                                                                                                                                               | 2.149008 | 1.972283 | 1.773440 | 2.691477 |   |   |     |          |  |  |  |  |      |          |          |  |  |  |     |          |          |          |  |  |     |          |          |          |          |  |      |          |          |          |          |          |     |          |          |          |          |          |     |          |          |          |          |          |     |          |          |          |          |          |     |          |          |          |          |          |      |          |          |          |          |          |      |          |          |          |          |          |  |   |   |   |   |    |     |          |  |  |  |  |     |          |          |  |  |  |     |          |          |          |  |  |     |          |          |          |          |  |      |          |          |          |          |          |      |          |          |          |          |          |
| 11 B                                                                                                                                        | 1.750304                                                                                                                                                                                                                                                                                                                                                                                                                                                                                                                                                                                                                                                                                                                                                                                                                                                                                                                                                                                                                                                                                                                                                                                                                                                                                                                                                                                                                                                                                                                                                                                                                                                                                                                                                                                                                                                                                                                                               | 1.944675 | 3.348895 | 2.871084 | 1.621699 |   |   |     |          |  |  |  |  |      |          |          |  |  |  |     |          |          |          |  |  |     |          |          |          |          |  |      |          |          |          |          |          |     |          |          |          |          |          |     |          |          |          |          |          |     |          |          |          |          |          |     |          |          |          |          |          |      |          |          |          |          |          |      |          |          |          |          |          |  |   |   |   |   |    |     |          |  |  |  |  |     |          |          |  |  |  |     |          |          |          |  |  |     |          |          |          |          |  |      |          |          |          |          |          |      |          |          |          |          |          |
|                                                                                                                                             | 6                                                                                                                                                                                                                                                                                                                                                                                                                                                                                                                                                                                                                                                                                                                                                                                                                                                                                                                                                                                                                                                                                                                                                                                                                                                                                                                                                                                                                                                                                                                                                                                                                                                                                                                                                                                                                                                                                                                                                      | 7        | 8        | 9        | 10       |   |   |     |          |  |  |  |  |      |          |          |  |  |  |     |          |          |          |  |  |     |          |          |          |          |  |      |          |          |          |          |          |     |          |          |          |          |          |     |          |          |          |          |          |     |          |          |          |          |          |     |          |          |          |          |          |      |          |          |          |          |          |      |          |          |          |          |          |  |   |   |   |   |    |     |          |  |  |  |  |     |          |          |  |  |  |     |          |          |          |  |  |     |          |          |          |          |  |      |          |          |          |          |          |      |          |          |          |          |          |
| 6 B                                                                                                                                         | 0.000000                                                                                                                                                                                                                                                                                                                                                                                                                                                                                                                                                                                                                                                                                                                                                                                                                                                                                                                                                                                                                                                                                                                                                                                                                                                                                                                                                                                                                                                                                                                                                                                                                                                                                                                                                                                                                                                                                                                                               |          |          |          |          |   |   |     |          |  |  |  |  |      |          |          |  |  |  |     |          |          |          |  |  |     |          |          |          |          |  |      |          |          |          |          |          |     |          |          |          |          |          |     |          |          |          |          |          |     |          |          |          |          |          |     |          |          |          |          |          |      |          |          |          |          |          |      |          |          |          |          |          |  |   |   |   |   |    |     |          |  |  |  |  |     |          |          |  |  |  |     |          |          |          |  |  |     |          |          |          |          |  |      |          |          |          |          |          |      |          |          |          |          |          |
| 7 B                                                                                                                                         | 1.833607                                                                                                                                                                                                                                                                                                                                                                                                                                                                                                                                                                                                                                                                                                                                                                                                                                                                                                                                                                                                                                                                                                                                                                                                                                                                                                                                                                                                                                                                                                                                                                                                                                                                                                                                                                                                                                                                                                                                               | 0.000000 |          |          |          |   |   |     |          |  |  |  |  |      |          |          |  |  |  |     |          |          |          |  |  |     |          |          |          |          |  |      |          |          |          |          |          |     |          |          |          |          |          |     |          |          |          |          |          |     |          |          |          |          |          |     |          |          |          |          |          |      |          |          |          |          |          |      |          |          |          |          |          |  |   |   |   |   |    |     |          |  |  |  |  |     |          |          |  |  |  |     |          |          |          |  |  |     |          |          |          |          |  |      |          |          |          |          |          |      |          |          |          |          |          |
| 8 B                                                                                                                                         | 1.836856                                                                                                                                                                                                                                                                                                                                                                                                                                                                                                                                                                                                                                                                                                                                                                                                                                                                                                                                                                                                                                                                                                                                                                                                                                                                                                                                                                                                                                                                                                                                                                                                                                                                                                                                                                                                                                                                                                                                               | 1.697435 | 0.000000 |          |          |   |   |     |          |  |  |  |  |      |          |          |  |  |  |     |          |          |          |  |  |     |          |          |          |          |  |      |          |          |          |          |          |     |          |          |          |          |          |     |          |          |          |          |          |     |          |          |          |          |          |     |          |          |          |          |          |      |          |          |          |          |          |      |          |          |          |          |          |  |   |   |   |   |    |     |          |  |  |  |  |     |          |          |  |  |  |     |          |          |          |  |  |     |          |          |          |          |  |      |          |          |          |          |          |      |          |          |          |          |          |
| 9 B                                                                                                                                         | 2.775032                                                                                                                                                                                                                                                                                                                                                                                                                                                                                                                                                                                                                                                                                                                                                                                                                                                                                                                                                                                                                                                                                                                                                                                                                                                                                                                                                                                                                                                                                                                                                                                                                                                                                                                                                                                                                                                                                                                                               | 1.843738 | 1.745317 | 0.000000 |          |   |   |     |          |  |  |  |  |      |          |          |  |  |  |     |          |          |          |  |  |     |          |          |          |          |  |      |          |          |          |          |          |     |          |          |          |          |          |     |          |          |          |          |          |     |          |          |          |          |          |     |          |          |          |          |          |      |          |          |          |          |          |      |          |          |          |          |          |  |   |   |   |   |    |     |          |  |  |  |  |     |          |          |  |  |  |     |          |          |          |  |  |     |          |          |          |          |  |      |          |          |          |          |          |      |          |          |          |          |          |
| 10 B                                                                                                                                        | 2.924731                                                                                                                                                                                                                                                                                                                                                                                                                                                                                                                                                                                                                                                                                                                                                                                                                                                                                                                                                                                                                                                                                                                                                                                                                                                                                                                                                                                                                                                                                                                                                                                                                                                                                                                                                                                                                                                                                                                                               | 2.961383 | 2.796553 | 1.858198 | 0.000000 |   |   |     |          |  |  |  |  |      |          |          |  |  |  |     |          |          |          |  |  |     |          |          |          |          |  |      |          |          |          |          |          |     |          |          |          |          |          |     |          |          |          |          |          |     |          |          |          |          |          |     |          |          |          |          |          |      |          |          |          |          |          |      |          |          |          |          |          |  |   |   |   |   |    |     |          |  |  |  |  |     |          |          |  |  |  |     |          |          |          |  |  |     |          |          |          |          |  |      |          |          |          |          |          |      |          |          |          |          |          |
| 11 B                                                                                                                                        | 1.706643                                                                                                                                                                                                                                                                                                                                                                                                                                                                                                                                                                                                                                                                                                                                                                                                                                                                                                                                                                                                                                                                                                                                                                                                                                                                                                                                                                                                                                                                                                                                                                                                                                                                                                                                                                                                                                                                                                                                               | 3.392678 | 2.886967 | 3.661285 | 2.949479 |   |   |     |          |  |  |  |  |      |          |          |  |  |  |     |          |          |          |  |  |     |          |          |          |          |  |      |          |          |          |          |          |     |          |          |          |          |          |     |          |          |          |          |          |     |          |          |          |          |          |     |          |          |          |          |          |      |          |          |          |          |          |      |          |          |          |          |          |  |   |   |   |   |    |     |          |  |  |  |  |     |          |          |  |  |  |     |          |          |          |  |  |     |          |          |          |          |  |      |          |          |          |          |          |      |          |          |          |          |          |
|  <p>6. -2080.6068605 +12.6<br/>C<sub>1</sub> H/L 1.98</p> | <table border="1"> <thead> <tr> <th></th> <th>1</th> <th>2</th> <th>3</th> <th>4</th> <th>5</th> </tr> </thead> <tbody> <tr><td>1 B</td><td>0.000000</td><td></td><td></td><td></td><td></td></tr> <tr><td>2 B</td><td>3.072145</td><td>0.000000</td><td></td><td></td><td></td></tr> <tr><td>3 C</td><td>3.262374</td><td>1.592838</td><td>0.000000</td><td></td><td></td></tr> <tr><td>4 P</td><td>1.856215</td><td>3.489902</td><td>3.077901</td><td>0.000000</td><td></td></tr> <tr><td>5 Fe</td><td>2.090534</td><td>3.346911</td><td>3.895726</td><td>2.159111</td><td>0.000000</td></tr> <tr><td>6 B</td><td>2.970173</td><td>1.775859</td><td>2.723131</td><td>3.013703</td><td>2.070110</td></tr> <tr><td>7 B</td><td>3.690040</td><td>1.782570</td><td>1.634897</td><td>3.134005</td><td>3.364591</td></tr> <tr><td>8 B</td><td>3.046455</td><td>2.842598</td><td>2.765665</td><td>1.979168</td><td>2.110900</td></tr> <tr><td>9 B</td><td>3.056296</td><td>2.665132</td><td>1.570779</td><td>1.994584</td><td>3.366093</td></tr> <tr><td>10 B</td><td>1.871326</td><td>1.888934</td><td>1.594929</td><td>2.424855</td><td>3.202357</td></tr> <tr><td>11 B</td><td>1.692771</td><td>1.785735</td><td>2.757202</td><td>2.798560</td><td>2.097378</td></tr> <tr> <th></th> <th>6</th> <th>7</th> <th>8</th> <th>9</th> <th>10</th> </tr> <tr><td>6 B</td><td>0.000000</td><td></td><td></td><td></td><td></td></tr> <tr><td>7 B</td><td>1.794926</td><td>0.000000</td><td></td><td></td><td></td></tr> <tr><td>8 B</td><td>1.780645</td><td>1.774386</td><td>0.000000</td><td></td><td></td></tr> <tr><td>9 B</td><td>2.829364</td><td>1.780425</td><td>1.859957</td><td>0.000000</td><td></td></tr> <tr><td>10 B</td><td>2.787192</td><td>2.674912</td><td>2.981158</td><td>2.117766</td><td>0.000000</td></tr> <tr><td>11 B</td><td>1.779102</td><td>2.879789</td><td>2.815154</td><td>3.138947</td><td>1.845792</td></tr> </tbody> </table> |          | 1        | 2        | 3        | 4 | 5 | 1 B | 0.000000 |  |  |  |  | 2 B  | 3.072145 | 0.000000 |  |  |  | 3 C | 3.262374 | 1.592838 | 0.000000 |  |  | 4 P | 1.856215 | 3.489902 | 3.077901 | 0.000000 |  | 5 Fe | 2.090534 | 3.346911 | 3.895726 | 2.159111 | 0.000000 | 6 B | 2.970173 | 1.775859 | 2.723131 | 3.013703 | 2.070110 | 7 B | 3.690040 | 1.782570 | 1.634897 | 3.134005 | 3.364591 | 8 B | 3.046455 | 2.842598 | 2.765665 | 1.979168 | 2.110900 | 9 B | 3.056296 | 2.665132 | 1.570779 | 1.994584 | 3.366093 | 10 B | 1.871326 | 1.888934 | 1.594929 | 2.424855 | 3.202357 | 11 B | 1.692771 | 1.785735 | 2.757202 | 2.798560 | 2.097378 |  | 6 | 7 | 8 | 9 | 10 | 6 B | 0.000000 |  |  |  |  | 7 B | 1.794926 | 0.000000 |  |  |  | 8 B | 1.780645 | 1.774386 | 0.000000 |  |  | 9 B | 2.829364 | 1.780425 | 1.859957 | 0.000000 |  | 10 B | 2.787192 | 2.674912 | 2.981158 | 2.117766 | 0.000000 | 11 B | 1.779102 | 2.879789 | 2.815154 | 3.138947 | 1.845792 |
|                                                                                                                                             | 1                                                                                                                                                                                                                                                                                                                                                                                                                                                                                                                                                                                                                                                                                                                                                                                                                                                                                                                                                                                                                                                                                                                                                                                                                                                                                                                                                                                                                                                                                                                                                                                                                                                                                                                                                                                                                                                                                                                                                      | 2        | 3        | 4        | 5        |   |   |     |          |  |  |  |  |      |          |          |  |  |  |     |          |          |          |  |  |     |          |          |          |          |  |      |          |          |          |          |          |     |          |          |          |          |          |     |          |          |          |          |          |     |          |          |          |          |          |     |          |          |          |          |          |      |          |          |          |          |          |      |          |          |          |          |          |  |   |   |   |   |    |     |          |  |  |  |  |     |          |          |  |  |  |     |          |          |          |  |  |     |          |          |          |          |  |      |          |          |          |          |          |      |          |          |          |          |          |
| 1 B                                                                                                                                         | 0.000000                                                                                                                                                                                                                                                                                                                                                                                                                                                                                                                                                                                                                                                                                                                                                                                                                                                                                                                                                                                                                                                                                                                                                                                                                                                                                                                                                                                                                                                                                                                                                                                                                                                                                                                                                                                                                                                                                                                                               |          |          |          |          |   |   |     |          |  |  |  |  |      |          |          |  |  |  |     |          |          |          |  |  |     |          |          |          |          |  |      |          |          |          |          |          |     |          |          |          |          |          |     |          |          |          |          |          |     |          |          |          |          |          |     |          |          |          |          |          |      |          |          |          |          |          |      |          |          |          |          |          |  |   |   |   |   |    |     |          |  |  |  |  |     |          |          |  |  |  |     |          |          |          |  |  |     |          |          |          |          |  |      |          |          |          |          |          |      |          |          |          |          |          |
| 2 B                                                                                                                                         | 3.072145                                                                                                                                                                                                                                                                                                                                                                                                                                                                                                                                                                                                                                                                                                                                                                                                                                                                                                                                                                                                                                                                                                                                                                                                                                                                                                                                                                                                                                                                                                                                                                                                                                                                                                                                                                                                                                                                                                                                               | 0.000000 |          |          |          |   |   |     |          |  |  |  |  |      |          |          |  |  |  |     |          |          |          |  |  |     |          |          |          |          |  |      |          |          |          |          |          |     |          |          |          |          |          |     |          |          |          |          |          |     |          |          |          |          |          |     |          |          |          |          |          |      |          |          |          |          |          |      |          |          |          |          |          |  |   |   |   |   |    |     |          |  |  |  |  |     |          |          |  |  |  |     |          |          |          |  |  |     |          |          |          |          |  |      |          |          |          |          |          |      |          |          |          |          |          |
| 3 C                                                                                                                                         | 3.262374                                                                                                                                                                                                                                                                                                                                                                                                                                                                                                                                                                                                                                                                                                                                                                                                                                                                                                                                                                                                                                                                                                                                                                                                                                                                                                                                                                                                                                                                                                                                                                                                                                                                                                                                                                                                                                                                                                                                               | 1.592838 | 0.000000 |          |          |   |   |     |          |  |  |  |  |      |          |          |  |  |  |     |          |          |          |  |  |     |          |          |          |          |  |      |          |          |          |          |          |     |          |          |          |          |          |     |          |          |          |          |          |     |          |          |          |          |          |     |          |          |          |          |          |      |          |          |          |          |          |      |          |          |          |          |          |  |   |   |   |   |    |     |          |  |  |  |  |     |          |          |  |  |  |     |          |          |          |  |  |     |          |          |          |          |  |      |          |          |          |          |          |      |          |          |          |          |          |
| 4 P                                                                                                                                         | 1.856215                                                                                                                                                                                                                                                                                                                                                                                                                                                                                                                                                                                                                                                                                                                                                                                                                                                                                                                                                                                                                                                                                                                                                                                                                                                                                                                                                                                                                                                                                                                                                                                                                                                                                                                                                                                                                                                                                                                                               | 3.489902 | 3.077901 | 0.000000 |          |   |   |     |          |  |  |  |  |      |          |          |  |  |  |     |          |          |          |  |  |     |          |          |          |          |  |      |          |          |          |          |          |     |          |          |          |          |          |     |          |          |          |          |          |     |          |          |          |          |          |     |          |          |          |          |          |      |          |          |          |          |          |      |          |          |          |          |          |  |   |   |   |   |    |     |          |  |  |  |  |     |          |          |  |  |  |     |          |          |          |  |  |     |          |          |          |          |  |      |          |          |          |          |          |      |          |          |          |          |          |
| 5 Fe                                                                                                                                        | 2.090534                                                                                                                                                                                                                                                                                                                                                                                                                                                                                                                                                                                                                                                                                                                                                                                                                                                                                                                                                                                                                                                                                                                                                                                                                                                                                                                                                                                                                                                                                                                                                                                                                                                                                                                                                                                                                                                                                                                                               | 3.346911 | 3.895726 | 2.159111 | 0.000000 |   |   |     |          |  |  |  |  |      |          |          |  |  |  |     |          |          |          |  |  |     |          |          |          |          |  |      |          |          |          |          |          |     |          |          |          |          |          |     |          |          |          |          |          |     |          |          |          |          |          |     |          |          |          |          |          |      |          |          |          |          |          |      |          |          |          |          |          |  |   |   |   |   |    |     |          |  |  |  |  |     |          |          |  |  |  |     |          |          |          |  |  |     |          |          |          |          |  |      |          |          |          |          |          |      |          |          |          |          |          |
| 6 B                                                                                                                                         | 2.970173                                                                                                                                                                                                                                                                                                                                                                                                                                                                                                                                                                                                                                                                                                                                                                                                                                                                                                                                                                                                                                                                                                                                                                                                                                                                                                                                                                                                                                                                                                                                                                                                                                                                                                                                                                                                                                                                                                                                               | 1.775859 | 2.723131 | 3.013703 | 2.070110 |   |   |     |          |  |  |  |  |      |          |          |  |  |  |     |          |          |          |  |  |     |          |          |          |          |  |      |          |          |          |          |          |     |          |          |          |          |          |     |          |          |          |          |          |     |          |          |          |          |          |     |          |          |          |          |          |      |          |          |          |          |          |      |          |          |          |          |          |  |   |   |   |   |    |     |          |  |  |  |  |     |          |          |  |  |  |     |          |          |          |  |  |     |          |          |          |          |  |      |          |          |          |          |          |      |          |          |          |          |          |
| 7 B                                                                                                                                         | 3.690040                                                                                                                                                                                                                                                                                                                                                                                                                                                                                                                                                                                                                                                                                                                                                                                                                                                                                                                                                                                                                                                                                                                                                                                                                                                                                                                                                                                                                                                                                                                                                                                                                                                                                                                                                                                                                                                                                                                                               | 1.782570 | 1.634897 | 3.134005 | 3.364591 |   |   |     |          |  |  |  |  |      |          |          |  |  |  |     |          |          |          |  |  |     |          |          |          |          |  |      |          |          |          |          |          |     |          |          |          |          |          |     |          |          |          |          |          |     |          |          |          |          |          |     |          |          |          |          |          |      |          |          |          |          |          |      |          |          |          |          |          |  |   |   |   |   |    |     |          |  |  |  |  |     |          |          |  |  |  |     |          |          |          |  |  |     |          |          |          |          |  |      |          |          |          |          |          |      |          |          |          |          |          |
| 8 B                                                                                                                                         | 3.046455                                                                                                                                                                                                                                                                                                                                                                                                                                                                                                                                                                                                                                                                                                                                                                                                                                                                                                                                                                                                                                                                                                                                                                                                                                                                                                                                                                                                                                                                                                                                                                                                                                                                                                                                                                                                                                                                                                                                               | 2.842598 | 2.765665 | 1.979168 | 2.110900 |   |   |     |          |  |  |  |  |      |          |          |  |  |  |     |          |          |          |  |  |     |          |          |          |          |  |      |          |          |          |          |          |     |          |          |          |          |          |     |          |          |          |          |          |     |          |          |          |          |          |     |          |          |          |          |          |      |          |          |          |          |          |      |          |          |          |          |          |  |   |   |   |   |    |     |          |  |  |  |  |     |          |          |  |  |  |     |          |          |          |  |  |     |          |          |          |          |  |      |          |          |          |          |          |      |          |          |          |          |          |
| 9 B                                                                                                                                         | 3.056296                                                                                                                                                                                                                                                                                                                                                                                                                                                                                                                                                                                                                                                                                                                                                                                                                                                                                                                                                                                                                                                                                                                                                                                                                                                                                                                                                                                                                                                                                                                                                                                                                                                                                                                                                                                                                                                                                                                                               | 2.665132 | 1.570779 | 1.994584 | 3.366093 |   |   |     |          |  |  |  |  |      |          |          |  |  |  |     |          |          |          |  |  |     |          |          |          |          |  |      |          |          |          |          |          |     |          |          |          |          |          |     |          |          |          |          |          |     |          |          |          |          |          |     |          |          |          |          |          |      |          |          |          |          |          |      |          |          |          |          |          |  |   |   |   |   |    |     |          |  |  |  |  |     |          |          |  |  |  |     |          |          |          |  |  |     |          |          |          |          |  |      |          |          |          |          |          |      |          |          |          |          |          |
| 10 B                                                                                                                                        | 1.871326                                                                                                                                                                                                                                                                                                                                                                                                                                                                                                                                                                                                                                                                                                                                                                                                                                                                                                                                                                                                                                                                                                                                                                                                                                                                                                                                                                                                                                                                                                                                                                                                                                                                                                                                                                                                                                                                                                                                               | 1.888934 | 1.594929 | 2.424855 | 3.202357 |   |   |     |          |  |  |  |  |      |          |          |  |  |  |     |          |          |          |  |  |     |          |          |          |          |  |      |          |          |          |          |          |     |          |          |          |          |          |     |          |          |          |          |          |     |          |          |          |          |          |     |          |          |          |          |          |      |          |          |          |          |          |      |          |          |          |          |          |  |   |   |   |   |    |     |          |  |  |  |  |     |          |          |  |  |  |     |          |          |          |  |  |     |          |          |          |          |  |      |          |          |          |          |          |      |          |          |          |          |          |
| 11 B                                                                                                                                        | 1.692771                                                                                                                                                                                                                                                                                                                                                                                                                                                                                                                                                                                                                                                                                                                                                                                                                                                                                                                                                                                                                                                                                                                                                                                                                                                                                                                                                                                                                                                                                                                                                                                                                                                                                                                                                                                                                                                                                                                                               | 1.785735 | 2.757202 | 2.798560 | 2.097378 |   |   |     |          |  |  |  |  |      |          |          |  |  |  |     |          |          |          |  |  |     |          |          |          |          |  |      |          |          |          |          |          |     |          |          |          |          |          |     |          |          |          |          |          |     |          |          |          |          |          |     |          |          |          |          |          |      |          |          |          |          |          |      |          |          |          |          |          |  |   |   |   |   |    |     |          |  |  |  |  |     |          |          |  |  |  |     |          |          |          |  |  |     |          |          |          |          |  |      |          |          |          |          |          |      |          |          |          |          |          |
|                                                                                                                                             | 6                                                                                                                                                                                                                                                                                                                                                                                                                                                                                                                                                                                                                                                                                                                                                                                                                                                                                                                                                                                                                                                                                                                                                                                                                                                                                                                                                                                                                                                                                                                                                                                                                                                                                                                                                                                                                                                                                                                                                      | 7        | 8        | 9        | 10       |   |   |     |          |  |  |  |  |      |          |          |  |  |  |     |          |          |          |  |  |     |          |          |          |          |  |      |          |          |          |          |          |     |          |          |          |          |          |     |          |          |          |          |          |     |          |          |          |          |          |     |          |          |          |          |          |      |          |          |          |          |          |      |          |          |          |          |          |  |   |   |   |   |    |     |          |  |  |  |  |     |          |          |  |  |  |     |          |          |          |  |  |     |          |          |          |          |  |      |          |          |          |          |          |      |          |          |          |          |          |
| 6 B                                                                                                                                         | 0.000000                                                                                                                                                                                                                                                                                                                                                                                                                                                                                                                                                                                                                                                                                                                                                                                                                                                                                                                                                                                                                                                                                                                                                                                                                                                                                                                                                                                                                                                                                                                                                                                                                                                                                                                                                                                                                                                                                                                                               |          |          |          |          |   |   |     |          |  |  |  |  |      |          |          |  |  |  |     |          |          |          |  |  |     |          |          |          |          |  |      |          |          |          |          |          |     |          |          |          |          |          |     |          |          |          |          |          |     |          |          |          |          |          |     |          |          |          |          |          |      |          |          |          |          |          |      |          |          |          |          |          |  |   |   |   |   |    |     |          |  |  |  |  |     |          |          |  |  |  |     |          |          |          |  |  |     |          |          |          |          |  |      |          |          |          |          |          |      |          |          |          |          |          |
| 7 B                                                                                                                                         | 1.794926                                                                                                                                                                                                                                                                                                                                                                                                                                                                                                                                                                                                                                                                                                                                                                                                                                                                                                                                                                                                                                                                                                                                                                                                                                                                                                                                                                                                                                                                                                                                                                                                                                                                                                                                                                                                                                                                                                                                               | 0.000000 |          |          |          |   |   |     |          |  |  |  |  |      |          |          |  |  |  |     |          |          |          |  |  |     |          |          |          |          |  |      |          |          |          |          |          |     |          |          |          |          |          |     |          |          |          |          |          |     |          |          |          |          |          |     |          |          |          |          |          |      |          |          |          |          |          |      |          |          |          |          |          |  |   |   |   |   |    |     |          |  |  |  |  |     |          |          |  |  |  |     |          |          |          |  |  |     |          |          |          |          |  |      |          |          |          |          |          |      |          |          |          |          |          |
| 8 B                                                                                                                                         | 1.780645                                                                                                                                                                                                                                                                                                                                                                                                                                                                                                                                                                                                                                                                                                                                                                                                                                                                                                                                                                                                                                                                                                                                                                                                                                                                                                                                                                                                                                                                                                                                                                                                                                                                                                                                                                                                                                                                                                                                               | 1.774386 | 0.000000 |          |          |   |   |     |          |  |  |  |  |      |          |          |  |  |  |     |          |          |          |  |  |     |          |          |          |          |  |      |          |          |          |          |          |     |          |          |          |          |          |     |          |          |          |          |          |     |          |          |          |          |          |     |          |          |          |          |          |      |          |          |          |          |          |      |          |          |          |          |          |  |   |   |   |   |    |     |          |  |  |  |  |     |          |          |  |  |  |     |          |          |          |  |  |     |          |          |          |          |  |      |          |          |          |          |          |      |          |          |          |          |          |
| 9 B                                                                                                                                         | 2.829364                                                                                                                                                                                                                                                                                                                                                                                                                                                                                                                                                                                                                                                                                                                                                                                                                                                                                                                                                                                                                                                                                                                                                                                                                                                                                                                                                                                                                                                                                                                                                                                                                                                                                                                                                                                                                                                                                                                                               | 1.780425 | 1.859957 | 0.000000 |          |   |   |     |          |  |  |  |  |      |          |          |  |  |  |     |          |          |          |  |  |     |          |          |          |          |  |      |          |          |          |          |          |     |          |          |          |          |          |     |          |          |          |          |          |     |          |          |          |          |          |     |          |          |          |          |          |      |          |          |          |          |          |      |          |          |          |          |          |  |   |   |   |   |    |     |          |  |  |  |  |     |          |          |  |  |  |     |          |          |          |  |  |     |          |          |          |          |  |      |          |          |          |          |          |      |          |          |          |          |          |
| 10 B                                                                                                                                        | 2.787192                                                                                                                                                                                                                                                                                                                                                                                                                                                                                                                                                                                                                                                                                                                                                                                                                                                                                                                                                                                                                                                                                                                                                                                                                                                                                                                                                                                                                                                                                                                                                                                                                                                                                                                                                                                                                                                                                                                                               | 2.674912 | 2.981158 | 2.117766 | 0.000000 |   |   |     |          |  |  |  |  |      |          |          |  |  |  |     |          |          |          |  |  |     |          |          |          |          |  |      |          |          |          |          |          |     |          |          |          |          |          |     |          |          |          |          |          |     |          |          |          |          |          |     |          |          |          |          |          |      |          |          |          |          |          |      |          |          |          |          |          |  |   |   |   |   |    |     |          |  |  |  |  |     |          |          |  |  |  |     |          |          |          |  |  |     |          |          |          |          |  |      |          |          |          |          |          |      |          |          |          |          |          |
| 11 B                                                                                                                                        | 1.779102                                                                                                                                                                                                                                                                                                                                                                                                                                                                                                                                                                                                                                                                                                                                                                                                                                                                                                                                                                                                                                                                                                                                                                                                                                                                                                                                                                                                                                                                                                                                                                                                                                                                                                                                                                                                                                                                                                                                               | 2.879789 | 2.815154 | 3.138947 | 1.845792 |   |   |     |          |  |  |  |  |      |          |          |  |  |  |     |          |          |          |  |  |     |          |          |          |          |  |      |          |          |          |          |          |     |          |          |          |          |          |     |          |          |          |          |          |     |          |          |          |          |          |     |          |          |          |          |          |      |          |          |          |          |          |      |          |          |          |          |          |  |   |   |   |   |    |     |          |  |  |  |  |     |          |          |  |  |  |     |          |          |          |  |  |     |          |          |          |          |  |      |          |          |          |          |          |      |          |          |          |          |          |

| 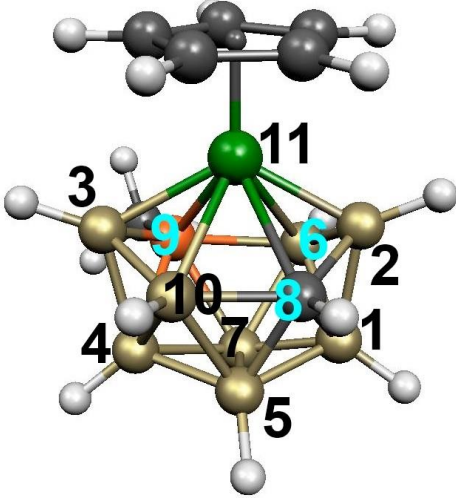 <p>7. -2080.6065968 +12.7<br/>C<sub>1</sub> H/L 2.00</p>  | <table border="1"> <thead> <tr> <th></th> <th>1</th> <th>2</th> <th>3</th> <th>4</th> <th>5</th> </tr> </thead> <tbody> <tr><td>1</td><td>B</td><td>0.000000</td><td></td><td></td><td></td></tr> <tr><td>2</td><td>B</td><td>1.732515</td><td>0.000000</td><td></td><td></td></tr> <tr><td>3</td><td>B</td><td>3.749663</td><td>3.622999</td><td>0.000000</td><td></td></tr> <tr><td>4</td><td>B</td><td>2.933711</td><td>3.676253</td><td>1.825049</td><td>0.000000</td></tr> <tr><td>5</td><td>B</td><td>1.752280</td><td>2.853882</td><td>2.943365</td><td>1.714661</td><td>0.000000</td></tr> <tr><td>6</td><td>B</td><td>1.769841</td><td>1.679851</td><td>3.272549</td><td>3.091069</td><td>2.856229</td></tr> <tr><td>7</td><td>B</td><td>1.731332</td><td>2.901031</td><td>3.035697</td><td>1.841972</td><td>1.788948</td></tr> <tr><td>8</td><td>C</td><td>1.707072</td><td>1.600154</td><td>3.008188</td><td>2.787275</td><td>1.686580</td></tr> <tr><td>9</td><td>P</td><td>3.052479</td><td>3.140456</td><td>1.840826</td><td>2.037557</td><td>2.976215</td></tr> <tr><td>10</td><td>B</td><td>2.884316</td><td>2.957737</td><td>1.692370</td><td>1.776154</td><td>1.778764</td></tr> <tr><td>11</td><td>Fe</td><td>3.072432</td><td>2.012236</td><td>2.119507</td><td>3.136077</td><td>3.210226</td></tr> <tr> <th></th> <th>6</th> <th>7</th> <th>8</th> <th>9</th> <th>10</th> </tr> <tr><td>6</td><td>B</td><td>0.000000</td><td></td><td></td><td></td></tr> <tr><td>7</td><td>B</td><td>1.865370</td><td>0.000000</td><td></td><td></td></tr> <tr><td>8</td><td>C</td><td>2.525006</td><td>2.679313</td><td>0.000000</td><td></td></tr> <tr><td>9</td><td>P</td><td>1.987392</td><td>1.978410</td><td>3.188704</td><td>0.000000</td></tr> <tr><td>10</td><td>B</td><td>3.226213</td><td>2.820624</td><td>1.710712</td><td>2.728437</td><td>0.000000</td></tr> <tr><td>11</td><td>Fe</td><td>2.349724</td><td>3.277261</td><td>2.180664</td><td>2.334691</td><td>2.205265</td></tr> </tbody> </table> |          | 1        | 2        | 3        | 4        | 5 | 1 | B | 0.000000 |  |  |  | 2 | B | 1.732515 | 0.000000 |  |  | 3 | B | 3.749663 | 3.622999 | 0.000000 |  | 4 | B | 2.933711 | 3.676253 | 1.825049 | 0.000000 | 5 | B | 1.752280 | 2.853882 | 2.943365 | 1.714661 | 0.000000 | 6 | B | 1.769841 | 1.679851 | 3.272549 | 3.091069 | 2.856229 | 7 | B | 1.731332 | 2.901031 | 3.035697 | 1.841972 | 1.788948 | 8 | C  | 1.707072 | 1.600154 | 3.008188 | 2.787275 | 1.686580 | 9 | P | 3.052479 | 3.140456 | 1.840826 | 2.037557 | 2.976215 | 10 | B | 2.884316 | 2.957737 | 1.692370 | 1.776154 | 1.778764 | 11 | Fe | 3.072432 | 2.012236 | 2.119507 | 3.136077 | 3.210226 |  | 6 | 7 | 8 | 9 | 10 | 6 | B | 0.000000 |  |  |  | 7 | B | 1.865370 | 0.000000 |  |  | 8 | C  | 2.525006 | 2.679313 | 0.000000 |  | 9 | P | 1.987392 | 1.978410 | 3.188704 | 0.000000 | 10 | B | 3.226213 | 2.820624 | 1.710712 | 2.728437 | 0.000000 | 11 | Fe | 2.349724 | 3.277261 | 2.180664 | 2.334691 | 2.205265 |
|---------------------------------------------------------------------------------------------------------------------------------------------|-------------------------------------------------------------------------------------------------------------------------------------------------------------------------------------------------------------------------------------------------------------------------------------------------------------------------------------------------------------------------------------------------------------------------------------------------------------------------------------------------------------------------------------------------------------------------------------------------------------------------------------------------------------------------------------------------------------------------------------------------------------------------------------------------------------------------------------------------------------------------------------------------------------------------------------------------------------------------------------------------------------------------------------------------------------------------------------------------------------------------------------------------------------------------------------------------------------------------------------------------------------------------------------------------------------------------------------------------------------------------------------------------------------------------------------------------------------------------------------------------------------------------------------------------------------------------------------------------------------------------------------------------------------------------------------------------------------------------------------------------------------------------------------------------------------------------------------------------------------------------------------------------------------------------------------------------------------------------------------------------------------------------|----------|----------|----------|----------|----------|---|---|---|----------|--|--|--|---|---|----------|----------|--|--|---|---|----------|----------|----------|--|---|---|----------|----------|----------|----------|---|---|----------|----------|----------|----------|----------|---|---|----------|----------|----------|----------|----------|---|---|----------|----------|----------|----------|----------|---|----|----------|----------|----------|----------|----------|---|---|----------|----------|----------|----------|----------|----|---|----------|----------|----------|----------|----------|----|----|----------|----------|----------|----------|----------|--|---|---|---|---|----|---|---|----------|--|--|--|---|---|----------|----------|--|--|---|----|----------|----------|----------|--|---|---|----------|----------|----------|----------|----|---|----------|----------|----------|----------|----------|----|----|----------|----------|----------|----------|----------|
|                                                                                                                                             | 1                                                                                                                                                                                                                                                                                                                                                                                                                                                                                                                                                                                                                                                                                                                                                                                                                                                                                                                                                                                                                                                                                                                                                                                                                                                                                                                                                                                                                                                                                                                                                                                                                                                                                                                                                                                                                                                                                                                                                                                                                       | 2        | 3        | 4        | 5        |          |   |   |   |          |  |  |  |   |   |          |          |  |  |   |   |          |          |          |  |   |   |          |          |          |          |   |   |          |          |          |          |          |   |   |          |          |          |          |          |   |   |          |          |          |          |          |   |    |          |          |          |          |          |   |   |          |          |          |          |          |    |   |          |          |          |          |          |    |    |          |          |          |          |          |  |   |   |   |   |    |   |   |          |  |  |  |   |   |          |          |  |  |   |    |          |          |          |  |   |   |          |          |          |          |    |   |          |          |          |          |          |    |    |          |          |          |          |          |
| 1                                                                                                                                           | B                                                                                                                                                                                                                                                                                                                                                                                                                                                                                                                                                                                                                                                                                                                                                                                                                                                                                                                                                                                                                                                                                                                                                                                                                                                                                                                                                                                                                                                                                                                                                                                                                                                                                                                                                                                                                                                                                                                                                                                                                       | 0.000000 |          |          |          |          |   |   |   |          |  |  |  |   |   |          |          |  |  |   |   |          |          |          |  |   |   |          |          |          |          |   |   |          |          |          |          |          |   |   |          |          |          |          |          |   |   |          |          |          |          |          |   |    |          |          |          |          |          |   |   |          |          |          |          |          |    |   |          |          |          |          |          |    |    |          |          |          |          |          |  |   |   |   |   |    |   |   |          |  |  |  |   |   |          |          |  |  |   |    |          |          |          |  |   |   |          |          |          |          |    |   |          |          |          |          |          |    |    |          |          |          |          |          |
| 2                                                                                                                                           | B                                                                                                                                                                                                                                                                                                                                                                                                                                                                                                                                                                                                                                                                                                                                                                                                                                                                                                                                                                                                                                                                                                                                                                                                                                                                                                                                                                                                                                                                                                                                                                                                                                                                                                                                                                                                                                                                                                                                                                                                                       | 1.732515 | 0.000000 |          |          |          |   |   |   |          |  |  |  |   |   |          |          |  |  |   |   |          |          |          |  |   |   |          |          |          |          |   |   |          |          |          |          |          |   |   |          |          |          |          |          |   |   |          |          |          |          |          |   |    |          |          |          |          |          |   |   |          |          |          |          |          |    |   |          |          |          |          |          |    |    |          |          |          |          |          |  |   |   |   |   |    |   |   |          |  |  |  |   |   |          |          |  |  |   |    |          |          |          |  |   |   |          |          |          |          |    |   |          |          |          |          |          |    |    |          |          |          |          |          |
| 3                                                                                                                                           | B                                                                                                                                                                                                                                                                                                                                                                                                                                                                                                                                                                                                                                                                                                                                                                                                                                                                                                                                                                                                                                                                                                                                                                                                                                                                                                                                                                                                                                                                                                                                                                                                                                                                                                                                                                                                                                                                                                                                                                                                                       | 3.749663 | 3.622999 | 0.000000 |          |          |   |   |   |          |  |  |  |   |   |          |          |  |  |   |   |          |          |          |  |   |   |          |          |          |          |   |   |          |          |          |          |          |   |   |          |          |          |          |          |   |   |          |          |          |          |          |   |    |          |          |          |          |          |   |   |          |          |          |          |          |    |   |          |          |          |          |          |    |    |          |          |          |          |          |  |   |   |   |   |    |   |   |          |  |  |  |   |   |          |          |  |  |   |    |          |          |          |  |   |   |          |          |          |          |    |   |          |          |          |          |          |    |    |          |          |          |          |          |
| 4                                                                                                                                           | B                                                                                                                                                                                                                                                                                                                                                                                                                                                                                                                                                                                                                                                                                                                                                                                                                                                                                                                                                                                                                                                                                                                                                                                                                                                                                                                                                                                                                                                                                                                                                                                                                                                                                                                                                                                                                                                                                                                                                                                                                       | 2.933711 | 3.676253 | 1.825049 | 0.000000 |          |   |   |   |          |  |  |  |   |   |          |          |  |  |   |   |          |          |          |  |   |   |          |          |          |          |   |   |          |          |          |          |          |   |   |          |          |          |          |          |   |   |          |          |          |          |          |   |    |          |          |          |          |          |   |   |          |          |          |          |          |    |   |          |          |          |          |          |    |    |          |          |          |          |          |  |   |   |   |   |    |   |   |          |  |  |  |   |   |          |          |  |  |   |    |          |          |          |  |   |   |          |          |          |          |    |   |          |          |          |          |          |    |    |          |          |          |          |          |
| 5                                                                                                                                           | B                                                                                                                                                                                                                                                                                                                                                                                                                                                                                                                                                                                                                                                                                                                                                                                                                                                                                                                                                                                                                                                                                                                                                                                                                                                                                                                                                                                                                                                                                                                                                                                                                                                                                                                                                                                                                                                                                                                                                                                                                       | 1.752280 | 2.853882 | 2.943365 | 1.714661 | 0.000000 |   |   |   |          |  |  |  |   |   |          |          |  |  |   |   |          |          |          |  |   |   |          |          |          |          |   |   |          |          |          |          |          |   |   |          |          |          |          |          |   |   |          |          |          |          |          |   |    |          |          |          |          |          |   |   |          |          |          |          |          |    |   |          |          |          |          |          |    |    |          |          |          |          |          |  |   |   |   |   |    |   |   |          |  |  |  |   |   |          |          |  |  |   |    |          |          |          |  |   |   |          |          |          |          |    |   |          |          |          |          |          |    |    |          |          |          |          |          |
| 6                                                                                                                                           | B                                                                                                                                                                                                                                                                                                                                                                                                                                                                                                                                                                                                                                                                                                                                                                                                                                                                                                                                                                                                                                                                                                                                                                                                                                                                                                                                                                                                                                                                                                                                                                                                                                                                                                                                                                                                                                                                                                                                                                                                                       | 1.769841 | 1.679851 | 3.272549 | 3.091069 | 2.856229 |   |   |   |          |  |  |  |   |   |          |          |  |  |   |   |          |          |          |  |   |   |          |          |          |          |   |   |          |          |          |          |          |   |   |          |          |          |          |          |   |   |          |          |          |          |          |   |    |          |          |          |          |          |   |   |          |          |          |          |          |    |   |          |          |          |          |          |    |    |          |          |          |          |          |  |   |   |   |   |    |   |   |          |  |  |  |   |   |          |          |  |  |   |    |          |          |          |  |   |   |          |          |          |          |    |   |          |          |          |          |          |    |    |          |          |          |          |          |
| 7                                                                                                                                           | B                                                                                                                                                                                                                                                                                                                                                                                                                                                                                                                                                                                                                                                                                                                                                                                                                                                                                                                                                                                                                                                                                                                                                                                                                                                                                                                                                                                                                                                                                                                                                                                                                                                                                                                                                                                                                                                                                                                                                                                                                       | 1.731332 | 2.901031 | 3.035697 | 1.841972 | 1.788948 |   |   |   |          |  |  |  |   |   |          |          |  |  |   |   |          |          |          |  |   |   |          |          |          |          |   |   |          |          |          |          |          |   |   |          |          |          |          |          |   |   |          |          |          |          |          |   |    |          |          |          |          |          |   |   |          |          |          |          |          |    |   |          |          |          |          |          |    |    |          |          |          |          |          |  |   |   |   |   |    |   |   |          |  |  |  |   |   |          |          |  |  |   |    |          |          |          |  |   |   |          |          |          |          |    |   |          |          |          |          |          |    |    |          |          |          |          |          |
| 8                                                                                                                                           | C                                                                                                                                                                                                                                                                                                                                                                                                                                                                                                                                                                                                                                                                                                                                                                                                                                                                                                                                                                                                                                                                                                                                                                                                                                                                                                                                                                                                                                                                                                                                                                                                                                                                                                                                                                                                                                                                                                                                                                                                                       | 1.707072 | 1.600154 | 3.008188 | 2.787275 | 1.686580 |   |   |   |          |  |  |  |   |   |          |          |  |  |   |   |          |          |          |  |   |   |          |          |          |          |   |   |          |          |          |          |          |   |   |          |          |          |          |          |   |   |          |          |          |          |          |   |    |          |          |          |          |          |   |   |          |          |          |          |          |    |   |          |          |          |          |          |    |    |          |          |          |          |          |  |   |   |   |   |    |   |   |          |  |  |  |   |   |          |          |  |  |   |    |          |          |          |  |   |   |          |          |          |          |    |   |          |          |          |          |          |    |    |          |          |          |          |          |
| 9                                                                                                                                           | P                                                                                                                                                                                                                                                                                                                                                                                                                                                                                                                                                                                                                                                                                                                                                                                                                                                                                                                                                                                                                                                                                                                                                                                                                                                                                                                                                                                                                                                                                                                                                                                                                                                                                                                                                                                                                                                                                                                                                                                                                       | 3.052479 | 3.140456 | 1.840826 | 2.037557 | 2.976215 |   |   |   |          |  |  |  |   |   |          |          |  |  |   |   |          |          |          |  |   |   |          |          |          |          |   |   |          |          |          |          |          |   |   |          |          |          |          |          |   |   |          |          |          |          |          |   |    |          |          |          |          |          |   |   |          |          |          |          |          |    |   |          |          |          |          |          |    |    |          |          |          |          |          |  |   |   |   |   |    |   |   |          |  |  |  |   |   |          |          |  |  |   |    |          |          |          |  |   |   |          |          |          |          |    |   |          |          |          |          |          |    |    |          |          |          |          |          |
| 10                                                                                                                                          | B                                                                                                                                                                                                                                                                                                                                                                                                                                                                                                                                                                                                                                                                                                                                                                                                                                                                                                                                                                                                                                                                                                                                                                                                                                                                                                                                                                                                                                                                                                                                                                                                                                                                                                                                                                                                                                                                                                                                                                                                                       | 2.884316 | 2.957737 | 1.692370 | 1.776154 | 1.778764 |   |   |   |          |  |  |  |   |   |          |          |  |  |   |   |          |          |          |  |   |   |          |          |          |          |   |   |          |          |          |          |          |   |   |          |          |          |          |          |   |   |          |          |          |          |          |   |    |          |          |          |          |          |   |   |          |          |          |          |          |    |   |          |          |          |          |          |    |    |          |          |          |          |          |  |   |   |   |   |    |   |   |          |  |  |  |   |   |          |          |  |  |   |    |          |          |          |  |   |   |          |          |          |          |    |   |          |          |          |          |          |    |    |          |          |          |          |          |
| 11                                                                                                                                          | Fe                                                                                                                                                                                                                                                                                                                                                                                                                                                                                                                                                                                                                                                                                                                                                                                                                                                                                                                                                                                                                                                                                                                                                                                                                                                                                                                                                                                                                                                                                                                                                                                                                                                                                                                                                                                                                                                                                                                                                                                                                      | 3.072432 | 2.012236 | 2.119507 | 3.136077 | 3.210226 |   |   |   |          |  |  |  |   |   |          |          |  |  |   |   |          |          |          |  |   |   |          |          |          |          |   |   |          |          |          |          |          |   |   |          |          |          |          |          |   |   |          |          |          |          |          |   |    |          |          |          |          |          |   |   |          |          |          |          |          |    |   |          |          |          |          |          |    |    |          |          |          |          |          |  |   |   |   |   |    |   |   |          |  |  |  |   |   |          |          |  |  |   |    |          |          |          |  |   |   |          |          |          |          |    |   |          |          |          |          |          |    |    |          |          |          |          |          |
|                                                                                                                                             | 6                                                                                                                                                                                                                                                                                                                                                                                                                                                                                                                                                                                                                                                                                                                                                                                                                                                                                                                                                                                                                                                                                                                                                                                                                                                                                                                                                                                                                                                                                                                                                                                                                                                                                                                                                                                                                                                                                                                                                                                                                       | 7        | 8        | 9        | 10       |          |   |   |   |          |  |  |  |   |   |          |          |  |  |   |   |          |          |          |  |   |   |          |          |          |          |   |   |          |          |          |          |          |   |   |          |          |          |          |          |   |   |          |          |          |          |          |   |    |          |          |          |          |          |   |   |          |          |          |          |          |    |   |          |          |          |          |          |    |    |          |          |          |          |          |  |   |   |   |   |    |   |   |          |  |  |  |   |   |          |          |  |  |   |    |          |          |          |  |   |   |          |          |          |          |    |   |          |          |          |          |          |    |    |          |          |          |          |          |
| 6                                                                                                                                           | B                                                                                                                                                                                                                                                                                                                                                                                                                                                                                                                                                                                                                                                                                                                                                                                                                                                                                                                                                                                                                                                                                                                                                                                                                                                                                                                                                                                                                                                                                                                                                                                                                                                                                                                                                                                                                                                                                                                                                                                                                       | 0.000000 |          |          |          |          |   |   |   |          |  |  |  |   |   |          |          |  |  |   |   |          |          |          |  |   |   |          |          |          |          |   |   |          |          |          |          |          |   |   |          |          |          |          |          |   |   |          |          |          |          |          |   |    |          |          |          |          |          |   |   |          |          |          |          |          |    |   |          |          |          |          |          |    |    |          |          |          |          |          |  |   |   |   |   |    |   |   |          |  |  |  |   |   |          |          |  |  |   |    |          |          |          |  |   |   |          |          |          |          |    |   |          |          |          |          |          |    |    |          |          |          |          |          |
| 7                                                                                                                                           | B                                                                                                                                                                                                                                                                                                                                                                                                                                                                                                                                                                                                                                                                                                                                                                                                                                                                                                                                                                                                                                                                                                                                                                                                                                                                                                                                                                                                                                                                                                                                                                                                                                                                                                                                                                                                                                                                                                                                                                                                                       | 1.865370 | 0.000000 |          |          |          |   |   |   |          |  |  |  |   |   |          |          |  |  |   |   |          |          |          |  |   |   |          |          |          |          |   |   |          |          |          |          |          |   |   |          |          |          |          |          |   |   |          |          |          |          |          |   |    |          |          |          |          |          |   |   |          |          |          |          |          |    |   |          |          |          |          |          |    |    |          |          |          |          |          |  |   |   |   |   |    |   |   |          |  |  |  |   |   |          |          |  |  |   |    |          |          |          |  |   |   |          |          |          |          |    |   |          |          |          |          |          |    |    |          |          |          |          |          |
| 8                                                                                                                                           | C                                                                                                                                                                                                                                                                                                                                                                                                                                                                                                                                                                                                                                                                                                                                                                                                                                                                                                                                                                                                                                                                                                                                                                                                                                                                                                                                                                                                                                                                                                                                                                                                                                                                                                                                                                                                                                                                                                                                                                                                                       | 2.525006 | 2.679313 | 0.000000 |          |          |   |   |   |          |  |  |  |   |   |          |          |  |  |   |   |          |          |          |  |   |   |          |          |          |          |   |   |          |          |          |          |          |   |   |          |          |          |          |          |   |   |          |          |          |          |          |   |    |          |          |          |          |          |   |   |          |          |          |          |          |    |   |          |          |          |          |          |    |    |          |          |          |          |          |  |   |   |   |   |    |   |   |          |  |  |  |   |   |          |          |  |  |   |    |          |          |          |  |   |   |          |          |          |          |    |   |          |          |          |          |          |    |    |          |          |          |          |          |
| 9                                                                                                                                           | P                                                                                                                                                                                                                                                                                                                                                                                                                                                                                                                                                                                                                                                                                                                                                                                                                                                                                                                                                                                                                                                                                                                                                                                                                                                                                                                                                                                                                                                                                                                                                                                                                                                                                                                                                                                                                                                                                                                                                                                                                       | 1.987392 | 1.978410 | 3.188704 | 0.000000 |          |   |   |   |          |  |  |  |   |   |          |          |  |  |   |   |          |          |          |  |   |   |          |          |          |          |   |   |          |          |          |          |          |   |   |          |          |          |          |          |   |   |          |          |          |          |          |   |    |          |          |          |          |          |   |   |          |          |          |          |          |    |   |          |          |          |          |          |    |    |          |          |          |          |          |  |   |   |   |   |    |   |   |          |  |  |  |   |   |          |          |  |  |   |    |          |          |          |  |   |   |          |          |          |          |    |   |          |          |          |          |          |    |    |          |          |          |          |          |
| 10                                                                                                                                          | B                                                                                                                                                                                                                                                                                                                                                                                                                                                                                                                                                                                                                                                                                                                                                                                                                                                                                                                                                                                                                                                                                                                                                                                                                                                                                                                                                                                                                                                                                                                                                                                                                                                                                                                                                                                                                                                                                                                                                                                                                       | 3.226213 | 2.820624 | 1.710712 | 2.728437 | 0.000000 |   |   |   |          |  |  |  |   |   |          |          |  |  |   |   |          |          |          |  |   |   |          |          |          |          |   |   |          |          |          |          |          |   |   |          |          |          |          |          |   |   |          |          |          |          |          |   |    |          |          |          |          |          |   |   |          |          |          |          |          |    |   |          |          |          |          |          |    |    |          |          |          |          |          |  |   |   |   |   |    |   |   |          |  |  |  |   |   |          |          |  |  |   |    |          |          |          |  |   |   |          |          |          |          |    |   |          |          |          |          |          |    |    |          |          |          |          |          |
| 11                                                                                                                                          | Fe                                                                                                                                                                                                                                                                                                                                                                                                                                                                                                                                                                                                                                                                                                                                                                                                                                                                                                                                                                                                                                                                                                                                                                                                                                                                                                                                                                                                                                                                                                                                                                                                                                                                                                                                                                                                                                                                                                                                                                                                                      | 2.349724 | 3.277261 | 2.180664 | 2.334691 | 2.205265 |   |   |   |          |  |  |  |   |   |          |          |  |  |   |   |          |          |          |  |   |   |          |          |          |          |   |   |          |          |          |          |          |   |   |          |          |          |          |          |   |   |          |          |          |          |          |   |    |          |          |          |          |          |   |   |          |          |          |          |          |    |   |          |          |          |          |          |    |    |          |          |          |          |          |  |   |   |   |   |    |   |   |          |  |  |  |   |   |          |          |  |  |   |    |          |          |          |  |   |   |          |          |          |          |    |   |          |          |          |          |          |    |    |          |          |          |          |          |
|  <p>8. -2080.6053738 +13.5<br/>C<sub>1</sub> H/L 2.56</p> | <table border="1"> <thead> <tr> <th></th> <th>1</th> <th>2</th> <th>3</th> <th>4</th> <th>5</th> </tr> </thead> <tbody> <tr><td>1</td><td>B</td><td>0.000000</td><td></td><td></td><td></td></tr> <tr><td>2</td><td>B</td><td>1.785183</td><td>0.000000</td><td></td><td></td></tr> <tr><td>3</td><td>B</td><td>1.899179</td><td>2.665150</td><td>0.000000</td><td></td></tr> <tr><td>4</td><td>B</td><td>3.210433</td><td>2.979629</td><td>3.108815</td><td>0.000000</td></tr> <tr><td>5</td><td>B</td><td>3.032555</td><td>1.838962</td><td>3.269260</td><td>1.755003</td><td>0.000000</td></tr> <tr><td>6</td><td>B</td><td>3.102189</td><td>3.238011</td><td>1.868854</td><td>1.918960</td><td>2.682644</td></tr> <tr><td>7</td><td>B</td><td>3.716750</td><td>2.981596</td><td>3.010261</td><td>1.726797</td><td>1.676724</td></tr> <tr><td>8</td><td>Fe</td><td>2.086526</td><td>2.051902</td><td>3.268102</td><td>2.113969</td><td>2.091694</td></tr> <tr><td>9</td><td>P</td><td>1.992475</td><td>2.944385</td><td>1.968735</td><td>1.996821</td><td>2.962261</td></tr> <tr><td>10</td><td>C</td><td>1.631380</td><td>1.585650</td><td>1.563567</td><td>3.540845</td><td>2.880394</td></tr> <tr><td>11</td><td>B</td><td>2.688176</td><td>1.968882</td><td>1.925971</td><td>2.695087</td><td>2.007329</td></tr> <tr> <th></th> <th>6</th> <th>7</th> <th>8</th> <th>9</th> <th>10</th> </tr> <tr><td>6</td><td>B</td><td>0.000000</td><td></td><td></td><td></td></tr> <tr><td>7</td><td>B</td><td>1.665975</td><td>0.000000</td><td></td><td></td></tr> <tr><td>8</td><td>Fe</td><td>3.286963</td><td>3.269134</td><td>0.000000</td><td></td></tr> <tr><td>9</td><td>P</td><td>1.965183</td><td>3.017756</td><td>2.121210</td><td>0.000000</td></tr> <tr><td>10</td><td>C</td><td>2.865889</td><td>3.226645</td><td>3.094019</td><td>2.867810</td><td>0.000000</td></tr> <tr><td>11</td><td>B</td><td>1.936706</td><td>1.748035</td><td>3.196727</td><td>2.902219</td><td>1.621706</td></tr> </tbody> </table> |          | 1        | 2        | 3        | 4        | 5 | 1 | B | 0.000000 |  |  |  | 2 | B | 1.785183 | 0.000000 |  |  | 3 | B | 1.899179 | 2.665150 | 0.000000 |  | 4 | B | 3.210433 | 2.979629 | 3.108815 | 0.000000 | 5 | B | 3.032555 | 1.838962 | 3.269260 | 1.755003 | 0.000000 | 6 | B | 3.102189 | 3.238011 | 1.868854 | 1.918960 | 2.682644 | 7 | B | 3.716750 | 2.981596 | 3.010261 | 1.726797 | 1.676724 | 8 | Fe | 2.086526 | 2.051902 | 3.268102 | 2.113969 | 2.091694 | 9 | P | 1.992475 | 2.944385 | 1.968735 | 1.996821 | 2.962261 | 10 | C | 1.631380 | 1.585650 | 1.563567 | 3.540845 | 2.880394 | 11 | B  | 2.688176 | 1.968882 | 1.925971 | 2.695087 | 2.007329 |  | 6 | 7 | 8 | 9 | 10 | 6 | B | 0.000000 |  |  |  | 7 | B | 1.665975 | 0.000000 |  |  | 8 | Fe | 3.286963 | 3.269134 | 0.000000 |  | 9 | P | 1.965183 | 3.017756 | 2.121210 | 0.000000 | 10 | C | 2.865889 | 3.226645 | 3.094019 | 2.867810 | 0.000000 | 11 | B  | 1.936706 | 1.748035 | 3.196727 | 2.902219 | 1.621706 |
|                                                                                                                                             | 1                                                                                                                                                                                                                                                                                                                                                                                                                                                                                                                                                                                                                                                                                                                                                                                                                                                                                                                                                                                                                                                                                                                                                                                                                                                                                                                                                                                                                                                                                                                                                                                                                                                                                                                                                                                                                                                                                                                                                                                                                       | 2        | 3        | 4        | 5        |          |   |   |   |          |  |  |  |   |   |          |          |  |  |   |   |          |          |          |  |   |   |          |          |          |          |   |   |          |          |          |          |          |   |   |          |          |          |          |          |   |   |          |          |          |          |          |   |    |          |          |          |          |          |   |   |          |          |          |          |          |    |   |          |          |          |          |          |    |    |          |          |          |          |          |  |   |   |   |   |    |   |   |          |  |  |  |   |   |          |          |  |  |   |    |          |          |          |  |   |   |          |          |          |          |    |   |          |          |          |          |          |    |    |          |          |          |          |          |
| 1                                                                                                                                           | B                                                                                                                                                                                                                                                                                                                                                                                                                                                                                                                                                                                                                                                                                                                                                                                                                                                                                                                                                                                                                                                                                                                                                                                                                                                                                                                                                                                                                                                                                                                                                                                                                                                                                                                                                                                                                                                                                                                                                                                                                       | 0.000000 |          |          |          |          |   |   |   |          |  |  |  |   |   |          |          |  |  |   |   |          |          |          |  |   |   |          |          |          |          |   |   |          |          |          |          |          |   |   |          |          |          |          |          |   |   |          |          |          |          |          |   |    |          |          |          |          |          |   |   |          |          |          |          |          |    |   |          |          |          |          |          |    |    |          |          |          |          |          |  |   |   |   |   |    |   |   |          |  |  |  |   |   |          |          |  |  |   |    |          |          |          |  |   |   |          |          |          |          |    |   |          |          |          |          |          |    |    |          |          |          |          |          |
| 2                                                                                                                                           | B                                                                                                                                                                                                                                                                                                                                                                                                                                                                                                                                                                                                                                                                                                                                                                                                                                                                                                                                                                                                                                                                                                                                                                                                                                                                                                                                                                                                                                                                                                                                                                                                                                                                                                                                                                                                                                                                                                                                                                                                                       | 1.785183 | 0.000000 |          |          |          |   |   |   |          |  |  |  |   |   |          |          |  |  |   |   |          |          |          |  |   |   |          |          |          |          |   |   |          |          |          |          |          |   |   |          |          |          |          |          |   |   |          |          |          |          |          |   |    |          |          |          |          |          |   |   |          |          |          |          |          |    |   |          |          |          |          |          |    |    |          |          |          |          |          |  |   |   |   |   |    |   |   |          |  |  |  |   |   |          |          |  |  |   |    |          |          |          |  |   |   |          |          |          |          |    |   |          |          |          |          |          |    |    |          |          |          |          |          |
| 3                                                                                                                                           | B                                                                                                                                                                                                                                                                                                                                                                                                                                                                                                                                                                                                                                                                                                                                                                                                                                                                                                                                                                                                                                                                                                                                                                                                                                                                                                                                                                                                                                                                                                                                                                                                                                                                                                                                                                                                                                                                                                                                                                                                                       | 1.899179 | 2.665150 | 0.000000 |          |          |   |   |   |          |  |  |  |   |   |          |          |  |  |   |   |          |          |          |  |   |   |          |          |          |          |   |   |          |          |          |          |          |   |   |          |          |          |          |          |   |   |          |          |          |          |          |   |    |          |          |          |          |          |   |   |          |          |          |          |          |    |   |          |          |          |          |          |    |    |          |          |          |          |          |  |   |   |   |   |    |   |   |          |  |  |  |   |   |          |          |  |  |   |    |          |          |          |  |   |   |          |          |          |          |    |   |          |          |          |          |          |    |    |          |          |          |          |          |
| 4                                                                                                                                           | B                                                                                                                                                                                                                                                                                                                                                                                                                                                                                                                                                                                                                                                                                                                                                                                                                                                                                                                                                                                                                                                                                                                                                                                                                                                                                                                                                                                                                                                                                                                                                                                                                                                                                                                                                                                                                                                                                                                                                                                                                       | 3.210433 | 2.979629 | 3.108815 | 0.000000 |          |   |   |   |          |  |  |  |   |   |          |          |  |  |   |   |          |          |          |  |   |   |          |          |          |          |   |   |          |          |          |          |          |   |   |          |          |          |          |          |   |   |          |          |          |          |          |   |    |          |          |          |          |          |   |   |          |          |          |          |          |    |   |          |          |          |          |          |    |    |          |          |          |          |          |  |   |   |   |   |    |   |   |          |  |  |  |   |   |          |          |  |  |   |    |          |          |          |  |   |   |          |          |          |          |    |   |          |          |          |          |          |    |    |          |          |          |          |          |
| 5                                                                                                                                           | B                                                                                                                                                                                                                                                                                                                                                                                                                                                                                                                                                                                                                                                                                                                                                                                                                                                                                                                                                                                                                                                                                                                                                                                                                                                                                                                                                                                                                                                                                                                                                                                                                                                                                                                                                                                                                                                                                                                                                                                                                       | 3.032555 | 1.838962 | 3.269260 | 1.755003 | 0.000000 |   |   |   |          |  |  |  |   |   |          |          |  |  |   |   |          |          |          |  |   |   |          |          |          |          |   |   |          |          |          |          |          |   |   |          |          |          |          |          |   |   |          |          |          |          |          |   |    |          |          |          |          |          |   |   |          |          |          |          |          |    |   |          |          |          |          |          |    |    |          |          |          |          |          |  |   |   |   |   |    |   |   |          |  |  |  |   |   |          |          |  |  |   |    |          |          |          |  |   |   |          |          |          |          |    |   |          |          |          |          |          |    |    |          |          |          |          |          |
| 6                                                                                                                                           | B                                                                                                                                                                                                                                                                                                                                                                                                                                                                                                                                                                                                                                                                                                                                                                                                                                                                                                                                                                                                                                                                                                                                                                                                                                                                                                                                                                                                                                                                                                                                                                                                                                                                                                                                                                                                                                                                                                                                                                                                                       | 3.102189 | 3.238011 | 1.868854 | 1.918960 | 2.682644 |   |   |   |          |  |  |  |   |   |          |          |  |  |   |   |          |          |          |  |   |   |          |          |          |          |   |   |          |          |          |          |          |   |   |          |          |          |          |          |   |   |          |          |          |          |          |   |    |          |          |          |          |          |   |   |          |          |          |          |          |    |   |          |          |          |          |          |    |    |          |          |          |          |          |  |   |   |   |   |    |   |   |          |  |  |  |   |   |          |          |  |  |   |    |          |          |          |  |   |   |          |          |          |          |    |   |          |          |          |          |          |    |    |          |          |          |          |          |
| 7                                                                                                                                           | B                                                                                                                                                                                                                                                                                                                                                                                                                                                                                                                                                                                                                                                                                                                                                                                                                                                                                                                                                                                                                                                                                                                                                                                                                                                                                                                                                                                                                                                                                                                                                                                                                                                                                                                                                                                                                                                                                                                                                                                                                       | 3.716750 | 2.981596 | 3.010261 | 1.726797 | 1.676724 |   |   |   |          |  |  |  |   |   |          |          |  |  |   |   |          |          |          |  |   |   |          |          |          |          |   |   |          |          |          |          |          |   |   |          |          |          |          |          |   |   |          |          |          |          |          |   |    |          |          |          |          |          |   |   |          |          |          |          |          |    |   |          |          |          |          |          |    |    |          |          |          |          |          |  |   |   |   |   |    |   |   |          |  |  |  |   |   |          |          |  |  |   |    |          |          |          |  |   |   |          |          |          |          |    |   |          |          |          |          |          |    |    |          |          |          |          |          |
| 8                                                                                                                                           | Fe                                                                                                                                                                                                                                                                                                                                                                                                                                                                                                                                                                                                                                                                                                                                                                                                                                                                                                                                                                                                                                                                                                                                                                                                                                                                                                                                                                                                                                                                                                                                                                                                                                                                                                                                                                                                                                                                                                                                                                                                                      | 2.086526 | 2.051902 | 3.268102 | 2.113969 | 2.091694 |   |   |   |          |  |  |  |   |   |          |          |  |  |   |   |          |          |          |  |   |   |          |          |          |          |   |   |          |          |          |          |          |   |   |          |          |          |          |          |   |   |          |          |          |          |          |   |    |          |          |          |          |          |   |   |          |          |          |          |          |    |   |          |          |          |          |          |    |    |          |          |          |          |          |  |   |   |   |   |    |   |   |          |  |  |  |   |   |          |          |  |  |   |    |          |          |          |  |   |   |          |          |          |          |    |   |          |          |          |          |          |    |    |          |          |          |          |          |
| 9                                                                                                                                           | P                                                                                                                                                                                                                                                                                                                                                                                                                                                                                                                                                                                                                                                                                                                                                                                                                                                                                                                                                                                                                                                                                                                                                                                                                                                                                                                                                                                                                                                                                                                                                                                                                                                                                                                                                                                                                                                                                                                                                                                                                       | 1.992475 | 2.944385 | 1.968735 | 1.996821 | 2.962261 |   |   |   |          |  |  |  |   |   |          |          |  |  |   |   |          |          |          |  |   |   |          |          |          |          |   |   |          |          |          |          |          |   |   |          |          |          |          |          |   |   |          |          |          |          |          |   |    |          |          |          |          |          |   |   |          |          |          |          |          |    |   |          |          |          |          |          |    |    |          |          |          |          |          |  |   |   |   |   |    |   |   |          |  |  |  |   |   |          |          |  |  |   |    |          |          |          |  |   |   |          |          |          |          |    |   |          |          |          |          |          |    |    |          |          |          |          |          |
| 10                                                                                                                                          | C                                                                                                                                                                                                                                                                                                                                                                                                                                                                                                                                                                                                                                                                                                                                                                                                                                                                                                                                                                                                                                                                                                                                                                                                                                                                                                                                                                                                                                                                                                                                                                                                                                                                                                                                                                                                                                                                                                                                                                                                                       | 1.631380 | 1.585650 | 1.563567 | 3.540845 | 2.880394 |   |   |   |          |  |  |  |   |   |          |          |  |  |   |   |          |          |          |  |   |   |          |          |          |          |   |   |          |          |          |          |          |   |   |          |          |          |          |          |   |   |          |          |          |          |          |   |    |          |          |          |          |          |   |   |          |          |          |          |          |    |   |          |          |          |          |          |    |    |          |          |          |          |          |  |   |   |   |   |    |   |   |          |  |  |  |   |   |          |          |  |  |   |    |          |          |          |  |   |   |          |          |          |          |    |   |          |          |          |          |          |    |    |          |          |          |          |          |
| 11                                                                                                                                          | B                                                                                                                                                                                                                                                                                                                                                                                                                                                                                                                                                                                                                                                                                                                                                                                                                                                                                                                                                                                                                                                                                                                                                                                                                                                                                                                                                                                                                                                                                                                                                                                                                                                                                                                                                                                                                                                                                                                                                                                                                       | 2.688176 | 1.968882 | 1.925971 | 2.695087 | 2.007329 |   |   |   |          |  |  |  |   |   |          |          |  |  |   |   |          |          |          |  |   |   |          |          |          |          |   |   |          |          |          |          |          |   |   |          |          |          |          |          |   |   |          |          |          |          |          |   |    |          |          |          |          |          |   |   |          |          |          |          |          |    |   |          |          |          |          |          |    |    |          |          |          |          |          |  |   |   |   |   |    |   |   |          |  |  |  |   |   |          |          |  |  |   |    |          |          |          |  |   |   |          |          |          |          |    |   |          |          |          |          |          |    |    |          |          |          |          |          |
|                                                                                                                                             | 6                                                                                                                                                                                                                                                                                                                                                                                                                                                                                                                                                                                                                                                                                                                                                                                                                                                                                                                                                                                                                                                                                                                                                                                                                                                                                                                                                                                                                                                                                                                                                                                                                                                                                                                                                                                                                                                                                                                                                                                                                       | 7        | 8        | 9        | 10       |          |   |   |   |          |  |  |  |   |   |          |          |  |  |   |   |          |          |          |  |   |   |          |          |          |          |   |   |          |          |          |          |          |   |   |          |          |          |          |          |   |   |          |          |          |          |          |   |    |          |          |          |          |          |   |   |          |          |          |          |          |    |   |          |          |          |          |          |    |    |          |          |          |          |          |  |   |   |   |   |    |   |   |          |  |  |  |   |   |          |          |  |  |   |    |          |          |          |  |   |   |          |          |          |          |    |   |          |          |          |          |          |    |    |          |          |          |          |          |
| 6                                                                                                                                           | B                                                                                                                                                                                                                                                                                                                                                                                                                                                                                                                                                                                                                                                                                                                                                                                                                                                                                                                                                                                                                                                                                                                                                                                                                                                                                                                                                                                                                                                                                                                                                                                                                                                                                                                                                                                                                                                                                                                                                                                                                       | 0.000000 |          |          |          |          |   |   |   |          |  |  |  |   |   |          |          |  |  |   |   |          |          |          |  |   |   |          |          |          |          |   |   |          |          |          |          |          |   |   |          |          |          |          |          |   |   |          |          |          |          |          |   |    |          |          |          |          |          |   |   |          |          |          |          |          |    |   |          |          |          |          |          |    |    |          |          |          |          |          |  |   |   |   |   |    |   |   |          |  |  |  |   |   |          |          |  |  |   |    |          |          |          |  |   |   |          |          |          |          |    |   |          |          |          |          |          |    |    |          |          |          |          |          |
| 7                                                                                                                                           | B                                                                                                                                                                                                                                                                                                                                                                                                                                                                                                                                                                                                                                                                                                                                                                                                                                                                                                                                                                                                                                                                                                                                                                                                                                                                                                                                                                                                                                                                                                                                                                                                                                                                                                                                                                                                                                                                                                                                                                                                                       | 1.665975 | 0.000000 |          |          |          |   |   |   |          |  |  |  |   |   |          |          |  |  |   |   |          |          |          |  |   |   |          |          |          |          |   |   |          |          |          |          |          |   |   |          |          |          |          |          |   |   |          |          |          |          |          |   |    |          |          |          |          |          |   |   |          |          |          |          |          |    |   |          |          |          |          |          |    |    |          |          |          |          |          |  |   |   |   |   |    |   |   |          |  |  |  |   |   |          |          |  |  |   |    |          |          |          |  |   |   |          |          |          |          |    |   |          |          |          |          |          |    |    |          |          |          |          |          |
| 8                                                                                                                                           | Fe                                                                                                                                                                                                                                                                                                                                                                                                                                                                                                                                                                                                                                                                                                                                                                                                                                                                                                                                                                                                                                                                                                                                                                                                                                                                                                                                                                                                                                                                                                                                                                                                                                                                                                                                                                                                                                                                                                                                                                                                                      | 3.286963 | 3.269134 | 0.000000 |          |          |   |   |   |          |  |  |  |   |   |          |          |  |  |   |   |          |          |          |  |   |   |          |          |          |          |   |   |          |          |          |          |          |   |   |          |          |          |          |          |   |   |          |          |          |          |          |   |    |          |          |          |          |          |   |   |          |          |          |          |          |    |   |          |          |          |          |          |    |    |          |          |          |          |          |  |   |   |   |   |    |   |   |          |  |  |  |   |   |          |          |  |  |   |    |          |          |          |  |   |   |          |          |          |          |    |   |          |          |          |          |          |    |    |          |          |          |          |          |
| 9                                                                                                                                           | P                                                                                                                                                                                                                                                                                                                                                                                                                                                                                                                                                                                                                                                                                                                                                                                                                                                                                                                                                                                                                                                                                                                                                                                                                                                                                                                                                                                                                                                                                                                                                                                                                                                                                                                                                                                                                                                                                                                                                                                                                       | 1.965183 | 3.017756 | 2.121210 | 0.000000 |          |   |   |   |          |  |  |  |   |   |          |          |  |  |   |   |          |          |          |  |   |   |          |          |          |          |   |   |          |          |          |          |          |   |   |          |          |          |          |          |   |   |          |          |          |          |          |   |    |          |          |          |          |          |   |   |          |          |          |          |          |    |   |          |          |          |          |          |    |    |          |          |          |          |          |  |   |   |   |   |    |   |   |          |  |  |  |   |   |          |          |  |  |   |    |          |          |          |  |   |   |          |          |          |          |    |   |          |          |          |          |          |    |    |          |          |          |          |          |
| 10                                                                                                                                          | C                                                                                                                                                                                                                                                                                                                                                                                                                                                                                                                                                                                                                                                                                                                                                                                                                                                                                                                                                                                                                                                                                                                                                                                                                                                                                                                                                                                                                                                                                                                                                                                                                                                                                                                                                                                                                                                                                                                                                                                                                       | 2.865889 | 3.226645 | 3.094019 | 2.867810 | 0.000000 |   |   |   |          |  |  |  |   |   |          |          |  |  |   |   |          |          |          |  |   |   |          |          |          |          |   |   |          |          |          |          |          |   |   |          |          |          |          |          |   |   |          |          |          |          |          |   |    |          |          |          |          |          |   |   |          |          |          |          |          |    |   |          |          |          |          |          |    |    |          |          |          |          |          |  |   |   |   |   |    |   |   |          |  |  |  |   |   |          |          |  |  |   |    |          |          |          |  |   |   |          |          |          |          |    |   |          |          |          |          |          |    |    |          |          |          |          |          |
| 11                                                                                                                                          | B                                                                                                                                                                                                                                                                                                                                                                                                                                                                                                                                                                                                                                                                                                                                                                                                                                                                                                                                                                                                                                                                                                                                                                                                                                                                                                                                                                                                                                                                                                                                                                                                                                                                                                                                                                                                                                                                                                                                                                                                                       | 1.936706 | 1.748035 | 3.196727 | 2.902219 | 1.621706 |   |   |   |          |  |  |  |   |   |          |          |  |  |   |   |          |          |          |  |   |   |          |          |          |          |   |   |          |          |          |          |          |   |   |          |          |          |          |          |   |   |          |          |          |          |          |   |    |          |          |          |          |          |   |   |          |          |          |          |          |    |   |          |          |          |          |          |    |    |          |          |          |          |          |  |   |   |   |   |    |   |   |          |  |  |  |   |   |          |          |  |  |   |    |          |          |          |  |   |   |          |          |          |          |    |   |          |          |          |          |          |    |    |          |          |          |          |          |

| 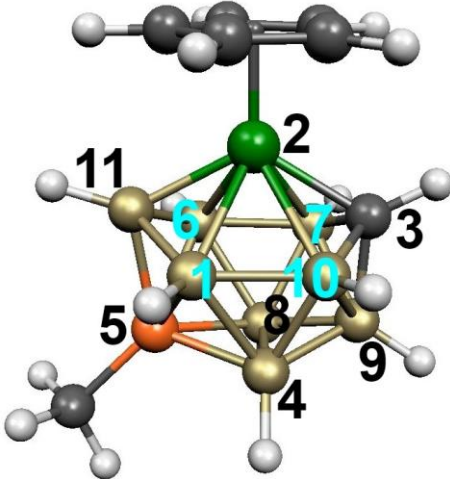 <p>9. -2080.6038284 +14.5<br/>C<sub>s</sub> H/L 2.17</p>   | <table border="1"> <thead> <tr> <th></th> <th>1</th> <th>2</th> <th>3</th> <th>4</th> <th>5</th> </tr> </thead> <tbody> <tr><td>1 B</td><td>0.000000</td><td></td><td></td><td></td><td></td></tr> <tr><td>2 Fe</td><td>2.194999</td><td>0.000000</td><td></td><td></td><td></td></tr> <tr><td>3 C</td><td>2.908034</td><td>1.970656</td><td>0.000000</td><td></td><td></td></tr> <tr><td>4 B</td><td>1.916193</td><td>3.215848</td><td>2.703892</td><td>0.000000</td><td></td></tr> <tr><td>5 P</td><td>1.989691</td><td>3.155980</td><td>3.606985</td><td>1.926529</td><td>0.000000</td></tr> <tr><td>6 B</td><td>2.739800</td><td>2.194739</td><td>2.908099</td><td>2.993381</td><td>1.989537</td></tr> <tr><td>7 B</td><td>3.237167</td><td>2.229300</td><td>1.564507</td><td>2.860432</td><td>3.049135</td></tr> <tr><td>8 B</td><td>2.993486</td><td>3.215752</td><td>2.703971</td><td>1.930400</td><td>1.926497</td></tr> <tr><td>9 B</td><td>3.005126</td><td>3.078248</td><td>1.621666</td><td>1.741913</td><td>3.038898</td></tr> <tr><td>10 B</td><td>1.819416</td><td>2.229627</td><td>1.564458</td><td>1.769467</td><td>3.049174</td></tr> <tr><td>11 B</td><td>1.750092</td><td>2.009086</td><td>3.459530</td><td>3.048111</td><td>1.885986</td></tr> <tr> <th></th> <th>6</th> <th>7</th> <th>8</th> <th>9</th> <th>10</th> </tr> <tr><td>6 B</td><td>0.000000</td><td></td><td></td><td></td><td></td></tr> <tr><td>7 B</td><td>1.819439</td><td>0.000000</td><td></td><td></td><td></td></tr> <tr><td>8 B</td><td>1.916161</td><td>1.769529</td><td>0.000000</td><td></td><td></td></tr> <tr><td>9 B</td><td>3.005073</td><td>1.827347</td><td>1.741908</td><td>0.000000</td><td></td></tr> <tr><td>10 B</td><td>3.237175</td><td>2.616600</td><td>2.860479</td><td>1.827383</td><td>0.000000</td></tr> <tr><td>11 B</td><td>1.750167</td><td>3.103901</td><td>3.048185</td><td>3.760619</td><td>3.103871</td></tr> </tbody> </table>  |          | 1        | 2        | 3        | 4 | 5 | 1 B | 0.000000 |  |  |  |  | 2 Fe | 2.194999 | 0.000000 |  |  |  | 3 C | 2.908034 | 1.970656 | 0.000000 |  |  | 4 B | 1.916193 | 3.215848 | 2.703892 | 0.000000 |  | 5 P | 1.989691 | 3.155980 | 3.606985 | 1.926529 | 0.000000 | 6 B | 2.739800 | 2.194739 | 2.908099 | 2.993381 | 1.989537 | 7 B | 3.237167 | 2.229300 | 1.564507 | 2.860432 | 3.049135 | 8 B | 2.993486 | 3.215752 | 2.703971 | 1.930400 | 1.926497 | 9 B | 3.005126 | 3.078248 | 1.621666 | 1.741913 | 3.038898 | 10 B | 1.819416 | 2.229627 | 1.564458 | 1.769467 | 3.049174 | 11 B  | 1.750092 | 2.009086 | 3.459530 | 3.048111 | 1.885986 |  | 6 | 7 | 8 | 9 | 10 | 6 B | 0.000000 |  |  |  |  | 7 B | 1.819439 | 0.000000 |  |  |  | 8 B | 1.916161 | 1.769529 | 0.000000 |  |  | 9 B | 3.005073 | 1.827347 | 1.741908 | 0.000000 |  | 10 B | 3.237175 | 2.616600 | 2.860479 | 1.827383 | 0.000000 | 11 B  | 1.750167 | 3.103901 | 3.048185 | 3.760619 | 3.103871 |
|----------------------------------------------------------------------------------------------------------------------------------------------|---------------------------------------------------------------------------------------------------------------------------------------------------------------------------------------------------------------------------------------------------------------------------------------------------------------------------------------------------------------------------------------------------------------------------------------------------------------------------------------------------------------------------------------------------------------------------------------------------------------------------------------------------------------------------------------------------------------------------------------------------------------------------------------------------------------------------------------------------------------------------------------------------------------------------------------------------------------------------------------------------------------------------------------------------------------------------------------------------------------------------------------------------------------------------------------------------------------------------------------------------------------------------------------------------------------------------------------------------------------------------------------------------------------------------------------------------------------------------------------------------------------------------------------------------------------------------------------------------------------------------------------------------------------------------------------------------------------------------------------------------------------------------------------------------------------------------------------------------------------------------------------------------------------------------------------------------------|----------|----------|----------|----------|---|---|-----|----------|--|--|--|--|------|----------|----------|--|--|--|-----|----------|----------|----------|--|--|-----|----------|----------|----------|----------|--|-----|----------|----------|----------|----------|----------|-----|----------|----------|----------|----------|----------|-----|----------|----------|----------|----------|----------|-----|----------|----------|----------|----------|----------|-----|----------|----------|----------|----------|----------|------|----------|----------|----------|----------|----------|-------|----------|----------|----------|----------|----------|--|---|---|---|---|----|-----|----------|--|--|--|--|-----|----------|----------|--|--|--|-----|----------|----------|----------|--|--|-----|----------|----------|----------|----------|--|------|----------|----------|----------|----------|----------|-------|----------|----------|----------|----------|----------|
|                                                                                                                                              | 1                                                                                                                                                                                                                                                                                                                                                                                                                                                                                                                                                                                                                                                                                                                                                                                                                                                                                                                                                                                                                                                                                                                                                                                                                                                                                                                                                                                                                                                                                                                                                                                                                                                                                                                                                                                                                                                                                                                                                       | 2        | 3        | 4        | 5        |   |   |     |          |  |  |  |  |      |          |          |  |  |  |     |          |          |          |  |  |     |          |          |          |          |  |     |          |          |          |          |          |     |          |          |          |          |          |     |          |          |          |          |          |     |          |          |          |          |          |     |          |          |          |          |          |      |          |          |          |          |          |       |          |          |          |          |          |  |   |   |   |   |    |     |          |  |  |  |  |     |          |          |  |  |  |     |          |          |          |  |  |     |          |          |          |          |  |      |          |          |          |          |          |       |          |          |          |          |          |
| 1 B                                                                                                                                          | 0.000000                                                                                                                                                                                                                                                                                                                                                                                                                                                                                                                                                                                                                                                                                                                                                                                                                                                                                                                                                                                                                                                                                                                                                                                                                                                                                                                                                                                                                                                                                                                                                                                                                                                                                                                                                                                                                                                                                                                                                |          |          |          |          |   |   |     |          |  |  |  |  |      |          |          |  |  |  |     |          |          |          |  |  |     |          |          |          |          |  |     |          |          |          |          |          |     |          |          |          |          |          |     |          |          |          |          |          |     |          |          |          |          |          |     |          |          |          |          |          |      |          |          |          |          |          |       |          |          |          |          |          |  |   |   |   |   |    |     |          |  |  |  |  |     |          |          |  |  |  |     |          |          |          |  |  |     |          |          |          |          |  |      |          |          |          |          |          |       |          |          |          |          |          |
| 2 Fe                                                                                                                                         | 2.194999                                                                                                                                                                                                                                                                                                                                                                                                                                                                                                                                                                                                                                                                                                                                                                                                                                                                                                                                                                                                                                                                                                                                                                                                                                                                                                                                                                                                                                                                                                                                                                                                                                                                                                                                                                                                                                                                                                                                                | 0.000000 |          |          |          |   |   |     |          |  |  |  |  |      |          |          |  |  |  |     |          |          |          |  |  |     |          |          |          |          |  |     |          |          |          |          |          |     |          |          |          |          |          |     |          |          |          |          |          |     |          |          |          |          |          |     |          |          |          |          |          |      |          |          |          |          |          |       |          |          |          |          |          |  |   |   |   |   |    |     |          |  |  |  |  |     |          |          |  |  |  |     |          |          |          |  |  |     |          |          |          |          |  |      |          |          |          |          |          |       |          |          |          |          |          |
| 3 C                                                                                                                                          | 2.908034                                                                                                                                                                                                                                                                                                                                                                                                                                                                                                                                                                                                                                                                                                                                                                                                                                                                                                                                                                                                                                                                                                                                                                                                                                                                                                                                                                                                                                                                                                                                                                                                                                                                                                                                                                                                                                                                                                                                                | 1.970656 | 0.000000 |          |          |   |   |     |          |  |  |  |  |      |          |          |  |  |  |     |          |          |          |  |  |     |          |          |          |          |  |     |          |          |          |          |          |     |          |          |          |          |          |     |          |          |          |          |          |     |          |          |          |          |          |     |          |          |          |          |          |      |          |          |          |          |          |       |          |          |          |          |          |  |   |   |   |   |    |     |          |  |  |  |  |     |          |          |  |  |  |     |          |          |          |  |  |     |          |          |          |          |  |      |          |          |          |          |          |       |          |          |          |          |          |
| 4 B                                                                                                                                          | 1.916193                                                                                                                                                                                                                                                                                                                                                                                                                                                                                                                                                                                                                                                                                                                                                                                                                                                                                                                                                                                                                                                                                                                                                                                                                                                                                                                                                                                                                                                                                                                                                                                                                                                                                                                                                                                                                                                                                                                                                | 3.215848 | 2.703892 | 0.000000 |          |   |   |     |          |  |  |  |  |      |          |          |  |  |  |     |          |          |          |  |  |     |          |          |          |          |  |     |          |          |          |          |          |     |          |          |          |          |          |     |          |          |          |          |          |     |          |          |          |          |          |     |          |          |          |          |          |      |          |          |          |          |          |       |          |          |          |          |          |  |   |   |   |   |    |     |          |  |  |  |  |     |          |          |  |  |  |     |          |          |          |  |  |     |          |          |          |          |  |      |          |          |          |          |          |       |          |          |          |          |          |
| 5 P                                                                                                                                          | 1.989691                                                                                                                                                                                                                                                                                                                                                                                                                                                                                                                                                                                                                                                                                                                                                                                                                                                                                                                                                                                                                                                                                                                                                                                                                                                                                                                                                                                                                                                                                                                                                                                                                                                                                                                                                                                                                                                                                                                                                | 3.155980 | 3.606985 | 1.926529 | 0.000000 |   |   |     |          |  |  |  |  |      |          |          |  |  |  |     |          |          |          |  |  |     |          |          |          |          |  |     |          |          |          |          |          |     |          |          |          |          |          |     |          |          |          |          |          |     |          |          |          |          |          |     |          |          |          |          |          |      |          |          |          |          |          |       |          |          |          |          |          |  |   |   |   |   |    |     |          |  |  |  |  |     |          |          |  |  |  |     |          |          |          |  |  |     |          |          |          |          |  |      |          |          |          |          |          |       |          |          |          |          |          |
| 6 B                                                                                                                                          | 2.739800                                                                                                                                                                                                                                                                                                                                                                                                                                                                                                                                                                                                                                                                                                                                                                                                                                                                                                                                                                                                                                                                                                                                                                                                                                                                                                                                                                                                                                                                                                                                                                                                                                                                                                                                                                                                                                                                                                                                                | 2.194739 | 2.908099 | 2.993381 | 1.989537 |   |   |     |          |  |  |  |  |      |          |          |  |  |  |     |          |          |          |  |  |     |          |          |          |          |  |     |          |          |          |          |          |     |          |          |          |          |          |     |          |          |          |          |          |     |          |          |          |          |          |     |          |          |          |          |          |      |          |          |          |          |          |       |          |          |          |          |          |  |   |   |   |   |    |     |          |  |  |  |  |     |          |          |  |  |  |     |          |          |          |  |  |     |          |          |          |          |  |      |          |          |          |          |          |       |          |          |          |          |          |
| 7 B                                                                                                                                          | 3.237167                                                                                                                                                                                                                                                                                                                                                                                                                                                                                                                                                                                                                                                                                                                                                                                                                                                                                                                                                                                                                                                                                                                                                                                                                                                                                                                                                                                                                                                                                                                                                                                                                                                                                                                                                                                                                                                                                                                                                | 2.229300 | 1.564507 | 2.860432 | 3.049135 |   |   |     |          |  |  |  |  |      |          |          |  |  |  |     |          |          |          |  |  |     |          |          |          |          |  |     |          |          |          |          |          |     |          |          |          |          |          |     |          |          |          |          |          |     |          |          |          |          |          |     |          |          |          |          |          |      |          |          |          |          |          |       |          |          |          |          |          |  |   |   |   |   |    |     |          |  |  |  |  |     |          |          |  |  |  |     |          |          |          |  |  |     |          |          |          |          |  |      |          |          |          |          |          |       |          |          |          |          |          |
| 8 B                                                                                                                                          | 2.993486                                                                                                                                                                                                                                                                                                                                                                                                                                                                                                                                                                                                                                                                                                                                                                                                                                                                                                                                                                                                                                                                                                                                                                                                                                                                                                                                                                                                                                                                                                                                                                                                                                                                                                                                                                                                                                                                                                                                                | 3.215752 | 2.703971 | 1.930400 | 1.926497 |   |   |     |          |  |  |  |  |      |          |          |  |  |  |     |          |          |          |  |  |     |          |          |          |          |  |     |          |          |          |          |          |     |          |          |          |          |          |     |          |          |          |          |          |     |          |          |          |          |          |     |          |          |          |          |          |      |          |          |          |          |          |       |          |          |          |          |          |  |   |   |   |   |    |     |          |  |  |  |  |     |          |          |  |  |  |     |          |          |          |  |  |     |          |          |          |          |  |      |          |          |          |          |          |       |          |          |          |          |          |
| 9 B                                                                                                                                          | 3.005126                                                                                                                                                                                                                                                                                                                                                                                                                                                                                                                                                                                                                                                                                                                                                                                                                                                                                                                                                                                                                                                                                                                                                                                                                                                                                                                                                                                                                                                                                                                                                                                                                                                                                                                                                                                                                                                                                                                                                | 3.078248 | 1.621666 | 1.741913 | 3.038898 |   |   |     |          |  |  |  |  |      |          |          |  |  |  |     |          |          |          |  |  |     |          |          |          |          |  |     |          |          |          |          |          |     |          |          |          |          |          |     |          |          |          |          |          |     |          |          |          |          |          |     |          |          |          |          |          |      |          |          |          |          |          |       |          |          |          |          |          |  |   |   |   |   |    |     |          |  |  |  |  |     |          |          |  |  |  |     |          |          |          |  |  |     |          |          |          |          |  |      |          |          |          |          |          |       |          |          |          |          |          |
| 10 B                                                                                                                                         | 1.819416                                                                                                                                                                                                                                                                                                                                                                                                                                                                                                                                                                                                                                                                                                                                                                                                                                                                                                                                                                                                                                                                                                                                                                                                                                                                                                                                                                                                                                                                                                                                                                                                                                                                                                                                                                                                                                                                                                                                                | 2.229627 | 1.564458 | 1.769467 | 3.049174 |   |   |     |          |  |  |  |  |      |          |          |  |  |  |     |          |          |          |  |  |     |          |          |          |          |  |     |          |          |          |          |          |     |          |          |          |          |          |     |          |          |          |          |          |     |          |          |          |          |          |     |          |          |          |          |          |      |          |          |          |          |          |       |          |          |          |          |          |  |   |   |   |   |    |     |          |  |  |  |  |     |          |          |  |  |  |     |          |          |          |  |  |     |          |          |          |          |  |      |          |          |          |          |          |       |          |          |          |          |          |
| 11 B                                                                                                                                         | 1.750092                                                                                                                                                                                                                                                                                                                                                                                                                                                                                                                                                                                                                                                                                                                                                                                                                                                                                                                                                                                                                                                                                                                                                                                                                                                                                                                                                                                                                                                                                                                                                                                                                                                                                                                                                                                                                                                                                                                                                | 2.009086 | 3.459530 | 3.048111 | 1.885986 |   |   |     |          |  |  |  |  |      |          |          |  |  |  |     |          |          |          |  |  |     |          |          |          |          |  |     |          |          |          |          |          |     |          |          |          |          |          |     |          |          |          |          |          |     |          |          |          |          |          |     |          |          |          |          |          |      |          |          |          |          |          |       |          |          |          |          |          |  |   |   |   |   |    |     |          |  |  |  |  |     |          |          |  |  |  |     |          |          |          |  |  |     |          |          |          |          |  |      |          |          |          |          |          |       |          |          |          |          |          |
|                                                                                                                                              | 6                                                                                                                                                                                                                                                                                                                                                                                                                                                                                                                                                                                                                                                                                                                                                                                                                                                                                                                                                                                                                                                                                                                                                                                                                                                                                                                                                                                                                                                                                                                                                                                                                                                                                                                                                                                                                                                                                                                                                       | 7        | 8        | 9        | 10       |   |   |     |          |  |  |  |  |      |          |          |  |  |  |     |          |          |          |  |  |     |          |          |          |          |  |     |          |          |          |          |          |     |          |          |          |          |          |     |          |          |          |          |          |     |          |          |          |          |          |     |          |          |          |          |          |      |          |          |          |          |          |       |          |          |          |          |          |  |   |   |   |   |    |     |          |  |  |  |  |     |          |          |  |  |  |     |          |          |          |  |  |     |          |          |          |          |  |      |          |          |          |          |          |       |          |          |          |          |          |
| 6 B                                                                                                                                          | 0.000000                                                                                                                                                                                                                                                                                                                                                                                                                                                                                                                                                                                                                                                                                                                                                                                                                                                                                                                                                                                                                                                                                                                                                                                                                                                                                                                                                                                                                                                                                                                                                                                                                                                                                                                                                                                                                                                                                                                                                |          |          |          |          |   |   |     |          |  |  |  |  |      |          |          |  |  |  |     |          |          |          |  |  |     |          |          |          |          |  |     |          |          |          |          |          |     |          |          |          |          |          |     |          |          |          |          |          |     |          |          |          |          |          |     |          |          |          |          |          |      |          |          |          |          |          |       |          |          |          |          |          |  |   |   |   |   |    |     |          |  |  |  |  |     |          |          |  |  |  |     |          |          |          |  |  |     |          |          |          |          |  |      |          |          |          |          |          |       |          |          |          |          |          |
| 7 B                                                                                                                                          | 1.819439                                                                                                                                                                                                                                                                                                                                                                                                                                                                                                                                                                                                                                                                                                                                                                                                                                                                                                                                                                                                                                                                                                                                                                                                                                                                                                                                                                                                                                                                                                                                                                                                                                                                                                                                                                                                                                                                                                                                                | 0.000000 |          |          |          |   |   |     |          |  |  |  |  |      |          |          |  |  |  |     |          |          |          |  |  |     |          |          |          |          |  |     |          |          |          |          |          |     |          |          |          |          |          |     |          |          |          |          |          |     |          |          |          |          |          |     |          |          |          |          |          |      |          |          |          |          |          |       |          |          |          |          |          |  |   |   |   |   |    |     |          |  |  |  |  |     |          |          |  |  |  |     |          |          |          |  |  |     |          |          |          |          |  |      |          |          |          |          |          |       |          |          |          |          |          |
| 8 B                                                                                                                                          | 1.916161                                                                                                                                                                                                                                                                                                                                                                                                                                                                                                                                                                                                                                                                                                                                                                                                                                                                                                                                                                                                                                                                                                                                                                                                                                                                                                                                                                                                                                                                                                                                                                                                                                                                                                                                                                                                                                                                                                                                                | 1.769529 | 0.000000 |          |          |   |   |     |          |  |  |  |  |      |          |          |  |  |  |     |          |          |          |  |  |     |          |          |          |          |  |     |          |          |          |          |          |     |          |          |          |          |          |     |          |          |          |          |          |     |          |          |          |          |          |     |          |          |          |          |          |      |          |          |          |          |          |       |          |          |          |          |          |  |   |   |   |   |    |     |          |  |  |  |  |     |          |          |  |  |  |     |          |          |          |  |  |     |          |          |          |          |  |      |          |          |          |          |          |       |          |          |          |          |          |
| 9 B                                                                                                                                          | 3.005073                                                                                                                                                                                                                                                                                                                                                                                                                                                                                                                                                                                                                                                                                                                                                                                                                                                                                                                                                                                                                                                                                                                                                                                                                                                                                                                                                                                                                                                                                                                                                                                                                                                                                                                                                                                                                                                                                                                                                | 1.827347 | 1.741908 | 0.000000 |          |   |   |     |          |  |  |  |  |      |          |          |  |  |  |     |          |          |          |  |  |     |          |          |          |          |  |     |          |          |          |          |          |     |          |          |          |          |          |     |          |          |          |          |          |     |          |          |          |          |          |     |          |          |          |          |          |      |          |          |          |          |          |       |          |          |          |          |          |  |   |   |   |   |    |     |          |  |  |  |  |     |          |          |  |  |  |     |          |          |          |  |  |     |          |          |          |          |  |      |          |          |          |          |          |       |          |          |          |          |          |
| 10 B                                                                                                                                         | 3.237175                                                                                                                                                                                                                                                                                                                                                                                                                                                                                                                                                                                                                                                                                                                                                                                                                                                                                                                                                                                                                                                                                                                                                                                                                                                                                                                                                                                                                                                                                                                                                                                                                                                                                                                                                                                                                                                                                                                                                | 2.616600 | 2.860479 | 1.827383 | 0.000000 |   |   |     |          |  |  |  |  |      |          |          |  |  |  |     |          |          |          |  |  |     |          |          |          |          |  |     |          |          |          |          |          |     |          |          |          |          |          |     |          |          |          |          |          |     |          |          |          |          |          |     |          |          |          |          |          |      |          |          |          |          |          |       |          |          |          |          |          |  |   |   |   |   |    |     |          |  |  |  |  |     |          |          |  |  |  |     |          |          |          |  |  |     |          |          |          |          |  |      |          |          |          |          |          |       |          |          |          |          |          |
| 11 B                                                                                                                                         | 1.750167                                                                                                                                                                                                                                                                                                                                                                                                                                                                                                                                                                                                                                                                                                                                                                                                                                                                                                                                                                                                                                                                                                                                                                                                                                                                                                                                                                                                                                                                                                                                                                                                                                                                                                                                                                                                                                                                                                                                                | 3.103901 | 3.048185 | 3.760619 | 3.103871 |   |   |     |          |  |  |  |  |      |          |          |  |  |  |     |          |          |          |  |  |     |          |          |          |          |  |     |          |          |          |          |          |     |          |          |          |          |          |     |          |          |          |          |          |     |          |          |          |          |          |     |          |          |          |          |          |      |          |          |          |          |          |       |          |          |          |          |          |  |   |   |   |   |    |     |          |  |  |  |  |     |          |          |  |  |  |     |          |          |          |  |  |     |          |          |          |          |  |      |          |          |          |          |          |       |          |          |          |          |          |
|  <p>10. -2080.6002569 +16.7<br/>C<sub>1</sub> H/L 2.79</p> | <table border="1"> <thead> <tr> <th></th> <th>1</th> <th>2</th> <th>3</th> <th>4</th> <th>5</th> </tr> </thead> <tbody> <tr><td>1 B</td><td>0.000000</td><td></td><td></td><td></td><td></td></tr> <tr><td>2 B</td><td>1.694491</td><td>0.000000</td><td></td><td></td><td></td></tr> <tr><td>3 P</td><td>3.565449</td><td>3.354191</td><td>0.000000</td><td></td><td></td></tr> <tr><td>4 B</td><td>2.897813</td><td>3.663880</td><td>2.011880</td><td>0.000000</td><td></td></tr> <tr><td>5 B</td><td>1.756851</td><td>2.900551</td><td>2.860733</td><td>1.750524</td><td>0.000000</td></tr> <tr><td>6 B</td><td>1.770844</td><td>1.741570</td><td>3.172768</td><td>2.950374</td><td>2.846186</td></tr> <tr><td>7 C</td><td>1.682772</td><td>2.769924</td><td>2.932732</td><td>1.658752</td><td>1.690867</td></tr> <tr><td>8 B</td><td>1.892056</td><td>1.717160</td><td>2.472737</td><td>2.770225</td><td>1.820946</td></tr> <tr><td>9 B</td><td>2.815927</td><td>2.939751</td><td>1.982370</td><td>1.839852</td><td>2.786043</td></tr> <tr><td>10 B</td><td>3.055190</td><td>3.425062</td><td>1.838860</td><td>1.829668</td><td>1.690555</td></tr> <tr><td>11 Fe</td><td>3.050031</td><td>1.965425</td><td>2.117938</td><td>3.299609</td><td>3.477349</td></tr> <tr> <th></th> <th>6</th> <th>7</th> <th>8</th> <th>9</th> <th>10</th> </tr> <tr><td>6 B</td><td>0.000000</td><td></td><td></td><td></td><td></td></tr> <tr><td>7 C</td><td>1.708091</td><td>0.000000</td><td></td><td></td><td></td></tr> <tr><td>8 B</td><td>2.626912</td><td>2.615238</td><td>0.000000</td><td></td><td></td></tr> <tr><td>9 B</td><td>1.754057</td><td>1.686855</td><td>2.914131</td><td>0.000000</td><td></td></tr> <tr><td>10 B</td><td>3.622260</td><td>2.803677</td><td>1.860899</td><td>2.951680</td><td>0.000000</td></tr> <tr><td>11 Fe</td><td>2.109004</td><td>3.076786</td><td>2.331512</td><td>2.102573</td><td>3.221608</td></tr> </tbody> </table> |          | 1        | 2        | 3        | 4 | 5 | 1 B | 0.000000 |  |  |  |  | 2 B  | 1.694491 | 0.000000 |  |  |  | 3 P | 3.565449 | 3.354191 | 0.000000 |  |  | 4 B | 2.897813 | 3.663880 | 2.011880 | 0.000000 |  | 5 B | 1.756851 | 2.900551 | 2.860733 | 1.750524 | 0.000000 | 6 B | 1.770844 | 1.741570 | 3.172768 | 2.950374 | 2.846186 | 7 C | 1.682772 | 2.769924 | 2.932732 | 1.658752 | 1.690867 | 8 B | 1.892056 | 1.717160 | 2.472737 | 2.770225 | 1.820946 | 9 B | 2.815927 | 2.939751 | 1.982370 | 1.839852 | 2.786043 | 10 B | 3.055190 | 3.425062 | 1.838860 | 1.829668 | 1.690555 | 11 Fe | 3.050031 | 1.965425 | 2.117938 | 3.299609 | 3.477349 |  | 6 | 7 | 8 | 9 | 10 | 6 B | 0.000000 |  |  |  |  | 7 C | 1.708091 | 0.000000 |  |  |  | 8 B | 2.626912 | 2.615238 | 0.000000 |  |  | 9 B | 1.754057 | 1.686855 | 2.914131 | 0.000000 |  | 10 B | 3.622260 | 2.803677 | 1.860899 | 2.951680 | 0.000000 | 11 Fe | 2.109004 | 3.076786 | 2.331512 | 2.102573 | 3.221608 |
|                                                                                                                                              | 1                                                                                                                                                                                                                                                                                                                                                                                                                                                                                                                                                                                                                                                                                                                                                                                                                                                                                                                                                                                                                                                                                                                                                                                                                                                                                                                                                                                                                                                                                                                                                                                                                                                                                                                                                                                                                                                                                                                                                       | 2        | 3        | 4        | 5        |   |   |     |          |  |  |  |  |      |          |          |  |  |  |     |          |          |          |  |  |     |          |          |          |          |  |     |          |          |          |          |          |     |          |          |          |          |          |     |          |          |          |          |          |     |          |          |          |          |          |     |          |          |          |          |          |      |          |          |          |          |          |       |          |          |          |          |          |  |   |   |   |   |    |     |          |  |  |  |  |     |          |          |  |  |  |     |          |          |          |  |  |     |          |          |          |          |  |      |          |          |          |          |          |       |          |          |          |          |          |
| 1 B                                                                                                                                          | 0.000000                                                                                                                                                                                                                                                                                                                                                                                                                                                                                                                                                                                                                                                                                                                                                                                                                                                                                                                                                                                                                                                                                                                                                                                                                                                                                                                                                                                                                                                                                                                                                                                                                                                                                                                                                                                                                                                                                                                                                |          |          |          |          |   |   |     |          |  |  |  |  |      |          |          |  |  |  |     |          |          |          |  |  |     |          |          |          |          |  |     |          |          |          |          |          |     |          |          |          |          |          |     |          |          |          |          |          |     |          |          |          |          |          |     |          |          |          |          |          |      |          |          |          |          |          |       |          |          |          |          |          |  |   |   |   |   |    |     |          |  |  |  |  |     |          |          |  |  |  |     |          |          |          |  |  |     |          |          |          |          |  |      |          |          |          |          |          |       |          |          |          |          |          |
| 2 B                                                                                                                                          | 1.694491                                                                                                                                                                                                                                                                                                                                                                                                                                                                                                                                                                                                                                                                                                                                                                                                                                                                                                                                                                                                                                                                                                                                                                                                                                                                                                                                                                                                                                                                                                                                                                                                                                                                                                                                                                                                                                                                                                                                                | 0.000000 |          |          |          |   |   |     |          |  |  |  |  |      |          |          |  |  |  |     |          |          |          |  |  |     |          |          |          |          |  |     |          |          |          |          |          |     |          |          |          |          |          |     |          |          |          |          |          |     |          |          |          |          |          |     |          |          |          |          |          |      |          |          |          |          |          |       |          |          |          |          |          |  |   |   |   |   |    |     |          |  |  |  |  |     |          |          |  |  |  |     |          |          |          |  |  |     |          |          |          |          |  |      |          |          |          |          |          |       |          |          |          |          |          |
| 3 P                                                                                                                                          | 3.565449                                                                                                                                                                                                                                                                                                                                                                                                                                                                                                                                                                                                                                                                                                                                                                                                                                                                                                                                                                                                                                                                                                                                                                                                                                                                                                                                                                                                                                                                                                                                                                                                                                                                                                                                                                                                                                                                                                                                                | 3.354191 | 0.000000 |          |          |   |   |     |          |  |  |  |  |      |          |          |  |  |  |     |          |          |          |  |  |     |          |          |          |          |  |     |          |          |          |          |          |     |          |          |          |          |          |     |          |          |          |          |          |     |          |          |          |          |          |     |          |          |          |          |          |      |          |          |          |          |          |       |          |          |          |          |          |  |   |   |   |   |    |     |          |  |  |  |  |     |          |          |  |  |  |     |          |          |          |  |  |     |          |          |          |          |  |      |          |          |          |          |          |       |          |          |          |          |          |
| 4 B                                                                                                                                          | 2.897813                                                                                                                                                                                                                                                                                                                                                                                                                                                                                                                                                                                                                                                                                                                                                                                                                                                                                                                                                                                                                                                                                                                                                                                                                                                                                                                                                                                                                                                                                                                                                                                                                                                                                                                                                                                                                                                                                                                                                | 3.663880 | 2.011880 | 0.000000 |          |   |   |     |          |  |  |  |  |      |          |          |  |  |  |     |          |          |          |  |  |     |          |          |          |          |  |     |          |          |          |          |          |     |          |          |          |          |          |     |          |          |          |          |          |     |          |          |          |          |          |     |          |          |          |          |          |      |          |          |          |          |          |       |          |          |          |          |          |  |   |   |   |   |    |     |          |  |  |  |  |     |          |          |  |  |  |     |          |          |          |  |  |     |          |          |          |          |  |      |          |          |          |          |          |       |          |          |          |          |          |
| 5 B                                                                                                                                          | 1.756851                                                                                                                                                                                                                                                                                                                                                                                                                                                                                                                                                                                                                                                                                                                                                                                                                                                                                                                                                                                                                                                                                                                                                                                                                                                                                                                                                                                                                                                                                                                                                                                                                                                                                                                                                                                                                                                                                                                                                | 2.900551 | 2.860733 | 1.750524 | 0.000000 |   |   |     |          |  |  |  |  |      |          |          |  |  |  |     |          |          |          |  |  |     |          |          |          |          |  |     |          |          |          |          |          |     |          |          |          |          |          |     |          |          |          |          |          |     |          |          |          |          |          |     |          |          |          |          |          |      |          |          |          |          |          |       |          |          |          |          |          |  |   |   |   |   |    |     |          |  |  |  |  |     |          |          |  |  |  |     |          |          |          |  |  |     |          |          |          |          |  |      |          |          |          |          |          |       |          |          |          |          |          |
| 6 B                                                                                                                                          | 1.770844                                                                                                                                                                                                                                                                                                                                                                                                                                                                                                                                                                                                                                                                                                                                                                                                                                                                                                                                                                                                                                                                                                                                                                                                                                                                                                                                                                                                                                                                                                                                                                                                                                                                                                                                                                                                                                                                                                                                                | 1.741570 | 3.172768 | 2.950374 | 2.846186 |   |   |     |          |  |  |  |  |      |          |          |  |  |  |     |          |          |          |  |  |     |          |          |          |          |  |     |          |          |          |          |          |     |          |          |          |          |          |     |          |          |          |          |          |     |          |          |          |          |          |     |          |          |          |          |          |      |          |          |          |          |          |       |          |          |          |          |          |  |   |   |   |   |    |     |          |  |  |  |  |     |          |          |  |  |  |     |          |          |          |  |  |     |          |          |          |          |  |      |          |          |          |          |          |       |          |          |          |          |          |
| 7 C                                                                                                                                          | 1.682772                                                                                                                                                                                                                                                                                                                                                                                                                                                                                                                                                                                                                                                                                                                                                                                                                                                                                                                                                                                                                                                                                                                                                                                                                                                                                                                                                                                                                                                                                                                                                                                                                                                                                                                                                                                                                                                                                                                                                | 2.769924 | 2.932732 | 1.658752 | 1.690867 |   |   |     |          |  |  |  |  |      |          |          |  |  |  |     |          |          |          |  |  |     |          |          |          |          |  |     |          |          |          |          |          |     |          |          |          |          |          |     |          |          |          |          |          |     |          |          |          |          |          |     |          |          |          |          |          |      |          |          |          |          |          |       |          |          |          |          |          |  |   |   |   |   |    |     |          |  |  |  |  |     |          |          |  |  |  |     |          |          |          |  |  |     |          |          |          |          |  |      |          |          |          |          |          |       |          |          |          |          |          |
| 8 B                                                                                                                                          | 1.892056                                                                                                                                                                                                                                                                                                                                                                                                                                                                                                                                                                                                                                                                                                                                                                                                                                                                                                                                                                                                                                                                                                                                                                                                                                                                                                                                                                                                                                                                                                                                                                                                                                                                                                                                                                                                                                                                                                                                                | 1.717160 | 2.472737 | 2.770225 | 1.820946 |   |   |     |          |  |  |  |  |      |          |          |  |  |  |     |          |          |          |  |  |     |          |          |          |          |  |     |          |          |          |          |          |     |          |          |          |          |          |     |          |          |          |          |          |     |          |          |          |          |          |     |          |          |          |          |          |      |          |          |          |          |          |       |          |          |          |          |          |  |   |   |   |   |    |     |          |  |  |  |  |     |          |          |  |  |  |     |          |          |          |  |  |     |          |          |          |          |  |      |          |          |          |          |          |       |          |          |          |          |          |
| 9 B                                                                                                                                          | 2.815927                                                                                                                                                                                                                                                                                                                                                                                                                                                                                                                                                                                                                                                                                                                                                                                                                                                                                                                                                                                                                                                                                                                                                                                                                                                                                                                                                                                                                                                                                                                                                                                                                                                                                                                                                                                                                                                                                                                                                | 2.939751 | 1.982370 | 1.839852 | 2.786043 |   |   |     |          |  |  |  |  |      |          |          |  |  |  |     |          |          |          |  |  |     |          |          |          |          |  |     |          |          |          |          |          |     |          |          |          |          |          |     |          |          |          |          |          |     |          |          |          |          |          |     |          |          |          |          |          |      |          |          |          |          |          |       |          |          |          |          |          |  |   |   |   |   |    |     |          |  |  |  |  |     |          |          |  |  |  |     |          |          |          |  |  |     |          |          |          |          |  |      |          |          |          |          |          |       |          |          |          |          |          |
| 10 B                                                                                                                                         | 3.055190                                                                                                                                                                                                                                                                                                                                                                                                                                                                                                                                                                                                                                                                                                                                                                                                                                                                                                                                                                                                                                                                                                                                                                                                                                                                                                                                                                                                                                                                                                                                                                                                                                                                                                                                                                                                                                                                                                                                                | 3.425062 | 1.838860 | 1.829668 | 1.690555 |   |   |     |          |  |  |  |  |      |          |          |  |  |  |     |          |          |          |  |  |     |          |          |          |          |  |     |          |          |          |          |          |     |          |          |          |          |          |     |          |          |          |          |          |     |          |          |          |          |          |     |          |          |          |          |          |      |          |          |          |          |          |       |          |          |          |          |          |  |   |   |   |   |    |     |          |  |  |  |  |     |          |          |  |  |  |     |          |          |          |  |  |     |          |          |          |          |  |      |          |          |          |          |          |       |          |          |          |          |          |
| 11 Fe                                                                                                                                        | 3.050031                                                                                                                                                                                                                                                                                                                                                                                                                                                                                                                                                                                                                                                                                                                                                                                                                                                                                                                                                                                                                                                                                                                                                                                                                                                                                                                                                                                                                                                                                                                                                                                                                                                                                                                                                                                                                                                                                                                                                | 1.965425 | 2.117938 | 3.299609 | 3.477349 |   |   |     |          |  |  |  |  |      |          |          |  |  |  |     |          |          |          |  |  |     |          |          |          |          |  |     |          |          |          |          |          |     |          |          |          |          |          |     |          |          |          |          |          |     |          |          |          |          |          |     |          |          |          |          |          |      |          |          |          |          |          |       |          |          |          |          |          |  |   |   |   |   |    |     |          |  |  |  |  |     |          |          |  |  |  |     |          |          |          |  |  |     |          |          |          |          |  |      |          |          |          |          |          |       |          |          |          |          |          |
|                                                                                                                                              | 6                                                                                                                                                                                                                                                                                                                                                                                                                                                                                                                                                                                                                                                                                                                                                                                                                                                                                                                                                                                                                                                                                                                                                                                                                                                                                                                                                                                                                                                                                                                                                                                                                                                                                                                                                                                                                                                                                                                                                       | 7        | 8        | 9        | 10       |   |   |     |          |  |  |  |  |      |          |          |  |  |  |     |          |          |          |  |  |     |          |          |          |          |  |     |          |          |          |          |          |     |          |          |          |          |          |     |          |          |          |          |          |     |          |          |          |          |          |     |          |          |          |          |          |      |          |          |          |          |          |       |          |          |          |          |          |  |   |   |   |   |    |     |          |  |  |  |  |     |          |          |  |  |  |     |          |          |          |  |  |     |          |          |          |          |  |      |          |          |          |          |          |       |          |          |          |          |          |
| 6 B                                                                                                                                          | 0.000000                                                                                                                                                                                                                                                                                                                                                                                                                                                                                                                                                                                                                                                                                                                                                                                                                                                                                                                                                                                                                                                                                                                                                                                                                                                                                                                                                                                                                                                                                                                                                                                                                                                                                                                                                                                                                                                                                                                                                |          |          |          |          |   |   |     |          |  |  |  |  |      |          |          |  |  |  |     |          |          |          |  |  |     |          |          |          |          |  |     |          |          |          |          |          |     |          |          |          |          |          |     |          |          |          |          |          |     |          |          |          |          |          |     |          |          |          |          |          |      |          |          |          |          |          |       |          |          |          |          |          |  |   |   |   |   |    |     |          |  |  |  |  |     |          |          |  |  |  |     |          |          |          |  |  |     |          |          |          |          |  |      |          |          |          |          |          |       |          |          |          |          |          |
| 7 C                                                                                                                                          | 1.708091                                                                                                                                                                                                                                                                                                                                                                                                                                                                                                                                                                                                                                                                                                                                                                                                                                                                                                                                                                                                                                                                                                                                                                                                                                                                                                                                                                                                                                                                                                                                                                                                                                                                                                                                                                                                                                                                                                                                                | 0.000000 |          |          |          |   |   |     |          |  |  |  |  |      |          |          |  |  |  |     |          |          |          |  |  |     |          |          |          |          |  |     |          |          |          |          |          |     |          |          |          |          |          |     |          |          |          |          |          |     |          |          |          |          |          |     |          |          |          |          |          |      |          |          |          |          |          |       |          |          |          |          |          |  |   |   |   |   |    |     |          |  |  |  |  |     |          |          |  |  |  |     |          |          |          |  |  |     |          |          |          |          |  |      |          |          |          |          |          |       |          |          |          |          |          |
| 8 B                                                                                                                                          | 2.626912                                                                                                                                                                                                                                                                                                                                                                                                                                                                                                                                                                                                                                                                                                                                                                                                                                                                                                                                                                                                                                                                                                                                                                                                                                                                                                                                                                                                                                                                                                                                                                                                                                                                                                                                                                                                                                                                                                                                                | 2.615238 | 0.000000 |          |          |   |   |     |          |  |  |  |  |      |          |          |  |  |  |     |          |          |          |  |  |     |          |          |          |          |  |     |          |          |          |          |          |     |          |          |          |          |          |     |          |          |          |          |          |     |          |          |          |          |          |     |          |          |          |          |          |      |          |          |          |          |          |       |          |          |          |          |          |  |   |   |   |   |    |     |          |  |  |  |  |     |          |          |  |  |  |     |          |          |          |  |  |     |          |          |          |          |  |      |          |          |          |          |          |       |          |          |          |          |          |
| 9 B                                                                                                                                          | 1.754057                                                                                                                                                                                                                                                                                                                                                                                                                                                                                                                                                                                                                                                                                                                                                                                                                                                                                                                                                                                                                                                                                                                                                                                                                                                                                                                                                                                                                                                                                                                                                                                                                                                                                                                                                                                                                                                                                                                                                | 1.686855 | 2.914131 | 0.000000 |          |   |   |     |          |  |  |  |  |      |          |          |  |  |  |     |          |          |          |  |  |     |          |          |          |          |  |     |          |          |          |          |          |     |          |          |          |          |          |     |          |          |          |          |          |     |          |          |          |          |          |     |          |          |          |          |          |      |          |          |          |          |          |       |          |          |          |          |          |  |   |   |   |   |    |     |          |  |  |  |  |     |          |          |  |  |  |     |          |          |          |  |  |     |          |          |          |          |  |      |          |          |          |          |          |       |          |          |          |          |          |
| 10 B                                                                                                                                         | 3.622260                                                                                                                                                                                                                                                                                                                                                                                                                                                                                                                                                                                                                                                                                                                                                                                                                                                                                                                                                                                                                                                                                                                                                                                                                                                                                                                                                                                                                                                                                                                                                                                                                                                                                                                                                                                                                                                                                                                                                | 2.803677 | 1.860899 | 2.951680 | 0.000000 |   |   |     |          |  |  |  |  |      |          |          |  |  |  |     |          |          |          |  |  |     |          |          |          |          |  |     |          |          |          |          |          |     |          |          |          |          |          |     |          |          |          |          |          |     |          |          |          |          |          |     |          |          |          |          |          |      |          |          |          |          |          |       |          |          |          |          |          |  |   |   |   |   |    |     |          |  |  |  |  |     |          |          |  |  |  |     |          |          |          |  |  |     |          |          |          |          |  |      |          |          |          |          |          |       |          |          |          |          |          |
| 11 Fe                                                                                                                                        | 2.109004                                                                                                                                                                                                                                                                                                                                                                                                                                                                                                                                                                                                                                                                                                                                                                                                                                                                                                                                                                                                                                                                                                                                                                                                                                                                                                                                                                                                                                                                                                                                                                                                                                                                                                                                                                                                                                                                                                                                                | 3.076786 | 2.331512 | 2.102573 | 3.221608 |   |   |     |          |  |  |  |  |      |          |          |  |  |  |     |          |          |          |  |  |     |          |          |          |          |  |     |          |          |          |          |          |     |          |          |          |          |          |     |          |          |          |          |          |     |          |          |          |          |          |     |          |          |          |          |          |      |          |          |          |          |          |       |          |          |          |          |          |  |   |   |   |   |    |     |          |  |  |  |  |     |          |          |  |  |  |     |          |          |          |  |  |     |          |          |          |          |  |      |          |          |          |          |          |       |          |          |          |          |          |



| 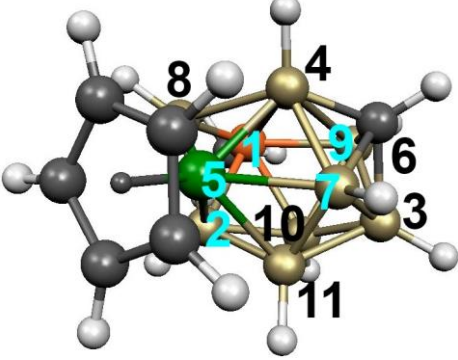 <p>11. -2080.5997639 +17.0<br/>C<sub>1</sub> H/L 1.97</p>  | <table border="1"> <thead> <tr> <th></th> <th>1</th> <th>2</th> <th>3</th> <th>4</th> <th>5</th> </tr> </thead> <tbody> <tr><td>1 P</td><td>0.000000</td><td></td><td></td><td></td><td></td></tr> <tr><td>2 B</td><td>2.035755</td><td>0.000000</td><td></td><td></td><td></td></tr> <tr><td>3 B</td><td>3.118626</td><td>2.946642</td><td>0.000000</td><td></td><td></td></tr> <tr><td>4 B</td><td>2.771612</td><td>2.943832</td><td>2.754734</td><td>0.000000</td><td></td></tr> <tr><td>5 Fe</td><td>3.221000</td><td>2.059904</td><td>3.253738</td><td>1.968689</td><td>0.000000</td></tr> <tr><td>6 C</td><td>3.006791</td><td>3.407610</td><td>1.648320</td><td>1.604880</td><td>3.050186</td></tr> <tr><td>7 B</td><td>3.569128</td><td>2.948994</td><td>1.768755</td><td>1.810040</td><td>2.052547</td></tr> <tr><td>8 B</td><td>1.897003</td><td>1.872357</td><td>3.722790</td><td>2.109600</td><td>1.899566</td></tr> <tr><td>9 B</td><td>1.971765</td><td>3.006346</td><td>1.766593</td><td>2.473679</td><td>3.607134</td></tr> <tr><td>10 B</td><td>1.988873</td><td>1.819771</td><td>1.752130</td><td>3.187032</td><td>3.218078</td></tr> <tr><td>11 B</td><td>3.077676</td><td>1.746715</td><td>1.788376</td><td>2.819520</td><td>2.103845</td></tr> <tr> <th></th> <th>6</th> <th>7</th> <th>8</th> <th>9</th> <th>10</th> </tr> <tr><td>6 C</td><td>0.000000</td><td></td><td></td><td></td><td></td></tr> <tr><td>7 B</td><td>1.642766</td><td>0.000000</td><td></td><td></td><td></td></tr> <tr><td>8 B</td><td>3.273893</td><td>3.207600</td><td>0.000000</td><td></td><td></td></tr> <tr><td>9 B</td><td>1.583258</td><td>2.748372</td><td>3.145329</td><td>0.000000</td><td></td></tr> <tr><td>10 B</td><td>2.727915</td><td>2.839901</td><td>3.038223</td><td>1.836860</td><td>0.000000</td></tr> <tr><td>11 B</td><td>2.719908</td><td>1.762269</td><td>3.017005</td><td>2.858601</td><td>1.777491</td></tr> </tbody> </table> |          | 1        | 2        | 3        | 4 | 5 | 1 P | 0.000000 |  |  |  |  | 2 B | 2.035755 | 0.000000 |  |  |  | 3 B | 3.118626 | 2.946642 | 0.000000 |  |  | 4 B | 2.771612 | 2.943832 | 2.754734 | 0.000000 |  | 5 Fe | 3.221000 | 2.059904 | 3.253738 | 1.968689 | 0.000000 | 6 C | 3.006791 | 3.407610 | 1.648320 | 1.604880 | 3.050186 | 7 B | 3.569128 | 2.948994 | 1.768755 | 1.810040 | 2.052547 | 8 B | 1.897003 | 1.872357 | 3.722790 | 2.109600 | 1.899566 | 9 B | 1.971765 | 3.006346 | 1.766593 | 2.473679 | 3.607134 | 10 B | 1.988873 | 1.819771 | 1.752130 | 3.187032 | 3.218078 | 11 B | 3.077676 | 1.746715 | 1.788376 | 2.819520 | 2.103845 |  | 6 | 7 | 8 | 9 | 10 | 6 C | 0.000000 |  |  |  |  | 7 B | 1.642766 | 0.000000 |  |  |  | 8 B | 3.273893 | 3.207600 | 0.000000 |  |  | 9 B | 1.583258 | 2.748372 | 3.145329 | 0.000000 |  | 10 B | 2.727915 | 2.839901 | 3.038223 | 1.836860 | 0.000000 | 11 B | 2.719908 | 1.762269 | 3.017005 | 2.858601 | 1.777491 |
|----------------------------------------------------------------------------------------------------------------------------------------------|--------------------------------------------------------------------------------------------------------------------------------------------------------------------------------------------------------------------------------------------------------------------------------------------------------------------------------------------------------------------------------------------------------------------------------------------------------------------------------------------------------------------------------------------------------------------------------------------------------------------------------------------------------------------------------------------------------------------------------------------------------------------------------------------------------------------------------------------------------------------------------------------------------------------------------------------------------------------------------------------------------------------------------------------------------------------------------------------------------------------------------------------------------------------------------------------------------------------------------------------------------------------------------------------------------------------------------------------------------------------------------------------------------------------------------------------------------------------------------------------------------------------------------------------------------------------------------------------------------------------------------------------------------------------------------------------------------------------------------------------------------------------------------------------------------------------------------------------------------------------------------------------------------------------------------------------------------|----------|----------|----------|----------|---|---|-----|----------|--|--|--|--|-----|----------|----------|--|--|--|-----|----------|----------|----------|--|--|-----|----------|----------|----------|----------|--|------|----------|----------|----------|----------|----------|-----|----------|----------|----------|----------|----------|-----|----------|----------|----------|----------|----------|-----|----------|----------|----------|----------|----------|-----|----------|----------|----------|----------|----------|------|----------|----------|----------|----------|----------|------|----------|----------|----------|----------|----------|--|---|---|---|---|----|-----|----------|--|--|--|--|-----|----------|----------|--|--|--|-----|----------|----------|----------|--|--|-----|----------|----------|----------|----------|--|------|----------|----------|----------|----------|----------|------|----------|----------|----------|----------|----------|
|                                                                                                                                              | 1                                                                                                                                                                                                                                                                                                                                                                                                                                                                                                                                                                                                                                                                                                                                                                                                                                                                                                                                                                                                                                                                                                                                                                                                                                                                                                                                                                                                                                                                                                                                                                                                                                                                                                                                                                                                                                                                                                                                                      | 2        | 3        | 4        | 5        |   |   |     |          |  |  |  |  |     |          |          |  |  |  |     |          |          |          |  |  |     |          |          |          |          |  |      |          |          |          |          |          |     |          |          |          |          |          |     |          |          |          |          |          |     |          |          |          |          |          |     |          |          |          |          |          |      |          |          |          |          |          |      |          |          |          |          |          |  |   |   |   |   |    |     |          |  |  |  |  |     |          |          |  |  |  |     |          |          |          |  |  |     |          |          |          |          |  |      |          |          |          |          |          |      |          |          |          |          |          |
| 1 P                                                                                                                                          | 0.000000                                                                                                                                                                                                                                                                                                                                                                                                                                                                                                                                                                                                                                                                                                                                                                                                                                                                                                                                                                                                                                                                                                                                                                                                                                                                                                                                                                                                                                                                                                                                                                                                                                                                                                                                                                                                                                                                                                                                               |          |          |          |          |   |   |     |          |  |  |  |  |     |          |          |  |  |  |     |          |          |          |  |  |     |          |          |          |          |  |      |          |          |          |          |          |     |          |          |          |          |          |     |          |          |          |          |          |     |          |          |          |          |          |     |          |          |          |          |          |      |          |          |          |          |          |      |          |          |          |          |          |  |   |   |   |   |    |     |          |  |  |  |  |     |          |          |  |  |  |     |          |          |          |  |  |     |          |          |          |          |  |      |          |          |          |          |          |      |          |          |          |          |          |
| 2 B                                                                                                                                          | 2.035755                                                                                                                                                                                                                                                                                                                                                                                                                                                                                                                                                                                                                                                                                                                                                                                                                                                                                                                                                                                                                                                                                                                                                                                                                                                                                                                                                                                                                                                                                                                                                                                                                                                                                                                                                                                                                                                                                                                                               | 0.000000 |          |          |          |   |   |     |          |  |  |  |  |     |          |          |  |  |  |     |          |          |          |  |  |     |          |          |          |          |  |      |          |          |          |          |          |     |          |          |          |          |          |     |          |          |          |          |          |     |          |          |          |          |          |     |          |          |          |          |          |      |          |          |          |          |          |      |          |          |          |          |          |  |   |   |   |   |    |     |          |  |  |  |  |     |          |          |  |  |  |     |          |          |          |  |  |     |          |          |          |          |  |      |          |          |          |          |          |      |          |          |          |          |          |
| 3 B                                                                                                                                          | 3.118626                                                                                                                                                                                                                                                                                                                                                                                                                                                                                                                                                                                                                                                                                                                                                                                                                                                                                                                                                                                                                                                                                                                                                                                                                                                                                                                                                                                                                                                                                                                                                                                                                                                                                                                                                                                                                                                                                                                                               | 2.946642 | 0.000000 |          |          |   |   |     |          |  |  |  |  |     |          |          |  |  |  |     |          |          |          |  |  |     |          |          |          |          |  |      |          |          |          |          |          |     |          |          |          |          |          |     |          |          |          |          |          |     |          |          |          |          |          |     |          |          |          |          |          |      |          |          |          |          |          |      |          |          |          |          |          |  |   |   |   |   |    |     |          |  |  |  |  |     |          |          |  |  |  |     |          |          |          |  |  |     |          |          |          |          |  |      |          |          |          |          |          |      |          |          |          |          |          |
| 4 B                                                                                                                                          | 2.771612                                                                                                                                                                                                                                                                                                                                                                                                                                                                                                                                                                                                                                                                                                                                                                                                                                                                                                                                                                                                                                                                                                                                                                                                                                                                                                                                                                                                                                                                                                                                                                                                                                                                                                                                                                                                                                                                                                                                               | 2.943832 | 2.754734 | 0.000000 |          |   |   |     |          |  |  |  |  |     |          |          |  |  |  |     |          |          |          |  |  |     |          |          |          |          |  |      |          |          |          |          |          |     |          |          |          |          |          |     |          |          |          |          |          |     |          |          |          |          |          |     |          |          |          |          |          |      |          |          |          |          |          |      |          |          |          |          |          |  |   |   |   |   |    |     |          |  |  |  |  |     |          |          |  |  |  |     |          |          |          |  |  |     |          |          |          |          |  |      |          |          |          |          |          |      |          |          |          |          |          |
| 5 Fe                                                                                                                                         | 3.221000                                                                                                                                                                                                                                                                                                                                                                                                                                                                                                                                                                                                                                                                                                                                                                                                                                                                                                                                                                                                                                                                                                                                                                                                                                                                                                                                                                                                                                                                                                                                                                                                                                                                                                                                                                                                                                                                                                                                               | 2.059904 | 3.253738 | 1.968689 | 0.000000 |   |   |     |          |  |  |  |  |     |          |          |  |  |  |     |          |          |          |  |  |     |          |          |          |          |  |      |          |          |          |          |          |     |          |          |          |          |          |     |          |          |          |          |          |     |          |          |          |          |          |     |          |          |          |          |          |      |          |          |          |          |          |      |          |          |          |          |          |  |   |   |   |   |    |     |          |  |  |  |  |     |          |          |  |  |  |     |          |          |          |  |  |     |          |          |          |          |  |      |          |          |          |          |          |      |          |          |          |          |          |
| 6 C                                                                                                                                          | 3.006791                                                                                                                                                                                                                                                                                                                                                                                                                                                                                                                                                                                                                                                                                                                                                                                                                                                                                                                                                                                                                                                                                                                                                                                                                                                                                                                                                                                                                                                                                                                                                                                                                                                                                                                                                                                                                                                                                                                                               | 3.407610 | 1.648320 | 1.604880 | 3.050186 |   |   |     |          |  |  |  |  |     |          |          |  |  |  |     |          |          |          |  |  |     |          |          |          |          |  |      |          |          |          |          |          |     |          |          |          |          |          |     |          |          |          |          |          |     |          |          |          |          |          |     |          |          |          |          |          |      |          |          |          |          |          |      |          |          |          |          |          |  |   |   |   |   |    |     |          |  |  |  |  |     |          |          |  |  |  |     |          |          |          |  |  |     |          |          |          |          |  |      |          |          |          |          |          |      |          |          |          |          |          |
| 7 B                                                                                                                                          | 3.569128                                                                                                                                                                                                                                                                                                                                                                                                                                                                                                                                                                                                                                                                                                                                                                                                                                                                                                                                                                                                                                                                                                                                                                                                                                                                                                                                                                                                                                                                                                                                                                                                                                                                                                                                                                                                                                                                                                                                               | 2.948994 | 1.768755 | 1.810040 | 2.052547 |   |   |     |          |  |  |  |  |     |          |          |  |  |  |     |          |          |          |  |  |     |          |          |          |          |  |      |          |          |          |          |          |     |          |          |          |          |          |     |          |          |          |          |          |     |          |          |          |          |          |     |          |          |          |          |          |      |          |          |          |          |          |      |          |          |          |          |          |  |   |   |   |   |    |     |          |  |  |  |  |     |          |          |  |  |  |     |          |          |          |  |  |     |          |          |          |          |  |      |          |          |          |          |          |      |          |          |          |          |          |
| 8 B                                                                                                                                          | 1.897003                                                                                                                                                                                                                                                                                                                                                                                                                                                                                                                                                                                                                                                                                                                                                                                                                                                                                                                                                                                                                                                                                                                                                                                                                                                                                                                                                                                                                                                                                                                                                                                                                                                                                                                                                                                                                                                                                                                                               | 1.872357 | 3.722790 | 2.109600 | 1.899566 |   |   |     |          |  |  |  |  |     |          |          |  |  |  |     |          |          |          |  |  |     |          |          |          |          |  |      |          |          |          |          |          |     |          |          |          |          |          |     |          |          |          |          |          |     |          |          |          |          |          |     |          |          |          |          |          |      |          |          |          |          |          |      |          |          |          |          |          |  |   |   |   |   |    |     |          |  |  |  |  |     |          |          |  |  |  |     |          |          |          |  |  |     |          |          |          |          |  |      |          |          |          |          |          |      |          |          |          |          |          |
| 9 B                                                                                                                                          | 1.971765                                                                                                                                                                                                                                                                                                                                                                                                                                                                                                                                                                                                                                                                                                                                                                                                                                                                                                                                                                                                                                                                                                                                                                                                                                                                                                                                                                                                                                                                                                                                                                                                                                                                                                                                                                                                                                                                                                                                               | 3.006346 | 1.766593 | 2.473679 | 3.607134 |   |   |     |          |  |  |  |  |     |          |          |  |  |  |     |          |          |          |  |  |     |          |          |          |          |  |      |          |          |          |          |          |     |          |          |          |          |          |     |          |          |          |          |          |     |          |          |          |          |          |     |          |          |          |          |          |      |          |          |          |          |          |      |          |          |          |          |          |  |   |   |   |   |    |     |          |  |  |  |  |     |          |          |  |  |  |     |          |          |          |  |  |     |          |          |          |          |  |      |          |          |          |          |          |      |          |          |          |          |          |
| 10 B                                                                                                                                         | 1.988873                                                                                                                                                                                                                                                                                                                                                                                                                                                                                                                                                                                                                                                                                                                                                                                                                                                                                                                                                                                                                                                                                                                                                                                                                                                                                                                                                                                                                                                                                                                                                                                                                                                                                                                                                                                                                                                                                                                                               | 1.819771 | 1.752130 | 3.187032 | 3.218078 |   |   |     |          |  |  |  |  |     |          |          |  |  |  |     |          |          |          |  |  |     |          |          |          |          |  |      |          |          |          |          |          |     |          |          |          |          |          |     |          |          |          |          |          |     |          |          |          |          |          |     |          |          |          |          |          |      |          |          |          |          |          |      |          |          |          |          |          |  |   |   |   |   |    |     |          |  |  |  |  |     |          |          |  |  |  |     |          |          |          |  |  |     |          |          |          |          |  |      |          |          |          |          |          |      |          |          |          |          |          |
| 11 B                                                                                                                                         | 3.077676                                                                                                                                                                                                                                                                                                                                                                                                                                                                                                                                                                                                                                                                                                                                                                                                                                                                                                                                                                                                                                                                                                                                                                                                                                                                                                                                                                                                                                                                                                                                                                                                                                                                                                                                                                                                                                                                                                                                               | 1.746715 | 1.788376 | 2.819520 | 2.103845 |   |   |     |          |  |  |  |  |     |          |          |  |  |  |     |          |          |          |  |  |     |          |          |          |          |  |      |          |          |          |          |          |     |          |          |          |          |          |     |          |          |          |          |          |     |          |          |          |          |          |     |          |          |          |          |          |      |          |          |          |          |          |      |          |          |          |          |          |  |   |   |   |   |    |     |          |  |  |  |  |     |          |          |  |  |  |     |          |          |          |  |  |     |          |          |          |          |  |      |          |          |          |          |          |      |          |          |          |          |          |
|                                                                                                                                              | 6                                                                                                                                                                                                                                                                                                                                                                                                                                                                                                                                                                                                                                                                                                                                                                                                                                                                                                                                                                                                                                                                                                                                                                                                                                                                                                                                                                                                                                                                                                                                                                                                                                                                                                                                                                                                                                                                                                                                                      | 7        | 8        | 9        | 10       |   |   |     |          |  |  |  |  |     |          |          |  |  |  |     |          |          |          |  |  |     |          |          |          |          |  |      |          |          |          |          |          |     |          |          |          |          |          |     |          |          |          |          |          |     |          |          |          |          |          |     |          |          |          |          |          |      |          |          |          |          |          |      |          |          |          |          |          |  |   |   |   |   |    |     |          |  |  |  |  |     |          |          |  |  |  |     |          |          |          |  |  |     |          |          |          |          |  |      |          |          |          |          |          |      |          |          |          |          |          |
| 6 C                                                                                                                                          | 0.000000                                                                                                                                                                                                                                                                                                                                                                                                                                                                                                                                                                                                                                                                                                                                                                                                                                                                                                                                                                                                                                                                                                                                                                                                                                                                                                                                                                                                                                                                                                                                                                                                                                                                                                                                                                                                                                                                                                                                               |          |          |          |          |   |   |     |          |  |  |  |  |     |          |          |  |  |  |     |          |          |          |  |  |     |          |          |          |          |  |      |          |          |          |          |          |     |          |          |          |          |          |     |          |          |          |          |          |     |          |          |          |          |          |     |          |          |          |          |          |      |          |          |          |          |          |      |          |          |          |          |          |  |   |   |   |   |    |     |          |  |  |  |  |     |          |          |  |  |  |     |          |          |          |  |  |     |          |          |          |          |  |      |          |          |          |          |          |      |          |          |          |          |          |
| 7 B                                                                                                                                          | 1.642766                                                                                                                                                                                                                                                                                                                                                                                                                                                                                                                                                                                                                                                                                                                                                                                                                                                                                                                                                                                                                                                                                                                                                                                                                                                                                                                                                                                                                                                                                                                                                                                                                                                                                                                                                                                                                                                                                                                                               | 0.000000 |          |          |          |   |   |     |          |  |  |  |  |     |          |          |  |  |  |     |          |          |          |  |  |     |          |          |          |          |  |      |          |          |          |          |          |     |          |          |          |          |          |     |          |          |          |          |          |     |          |          |          |          |          |     |          |          |          |          |          |      |          |          |          |          |          |      |          |          |          |          |          |  |   |   |   |   |    |     |          |  |  |  |  |     |          |          |  |  |  |     |          |          |          |  |  |     |          |          |          |          |  |      |          |          |          |          |          |      |          |          |          |          |          |
| 8 B                                                                                                                                          | 3.273893                                                                                                                                                                                                                                                                                                                                                                                                                                                                                                                                                                                                                                                                                                                                                                                                                                                                                                                                                                                                                                                                                                                                                                                                                                                                                                                                                                                                                                                                                                                                                                                                                                                                                                                                                                                                                                                                                                                                               | 3.207600 | 0.000000 |          |          |   |   |     |          |  |  |  |  |     |          |          |  |  |  |     |          |          |          |  |  |     |          |          |          |          |  |      |          |          |          |          |          |     |          |          |          |          |          |     |          |          |          |          |          |     |          |          |          |          |          |     |          |          |          |          |          |      |          |          |          |          |          |      |          |          |          |          |          |  |   |   |   |   |    |     |          |  |  |  |  |     |          |          |  |  |  |     |          |          |          |  |  |     |          |          |          |          |  |      |          |          |          |          |          |      |          |          |          |          |          |
| 9 B                                                                                                                                          | 1.583258                                                                                                                                                                                                                                                                                                                                                                                                                                                                                                                                                                                                                                                                                                                                                                                                                                                                                                                                                                                                                                                                                                                                                                                                                                                                                                                                                                                                                                                                                                                                                                                                                                                                                                                                                                                                                                                                                                                                               | 2.748372 | 3.145329 | 0.000000 |          |   |   |     |          |  |  |  |  |     |          |          |  |  |  |     |          |          |          |  |  |     |          |          |          |          |  |      |          |          |          |          |          |     |          |          |          |          |          |     |          |          |          |          |          |     |          |          |          |          |          |     |          |          |          |          |          |      |          |          |          |          |          |      |          |          |          |          |          |  |   |   |   |   |    |     |          |  |  |  |  |     |          |          |  |  |  |     |          |          |          |  |  |     |          |          |          |          |  |      |          |          |          |          |          |      |          |          |          |          |          |
| 10 B                                                                                                                                         | 2.727915                                                                                                                                                                                                                                                                                                                                                                                                                                                                                                                                                                                                                                                                                                                                                                                                                                                                                                                                                                                                                                                                                                                                                                                                                                                                                                                                                                                                                                                                                                                                                                                                                                                                                                                                                                                                                                                                                                                                               | 2.839901 | 3.038223 | 1.836860 | 0.000000 |   |   |     |          |  |  |  |  |     |          |          |  |  |  |     |          |          |          |  |  |     |          |          |          |          |  |      |          |          |          |          |          |     |          |          |          |          |          |     |          |          |          |          |          |     |          |          |          |          |          |     |          |          |          |          |          |      |          |          |          |          |          |      |          |          |          |          |          |  |   |   |   |   |    |     |          |  |  |  |  |     |          |          |  |  |  |     |          |          |          |  |  |     |          |          |          |          |  |      |          |          |          |          |          |      |          |          |          |          |          |
| 11 B                                                                                                                                         | 2.719908                                                                                                                                                                                                                                                                                                                                                                                                                                                                                                                                                                                                                                                                                                                                                                                                                                                                                                                                                                                                                                                                                                                                                                                                                                                                                                                                                                                                                                                                                                                                                                                                                                                                                                                                                                                                                                                                                                                                               | 1.762269 | 3.017005 | 2.858601 | 1.777491 |   |   |     |          |  |  |  |  |     |          |          |  |  |  |     |          |          |          |  |  |     |          |          |          |          |  |      |          |          |          |          |          |     |          |          |          |          |          |     |          |          |          |          |          |     |          |          |          |          |          |     |          |          |          |          |          |      |          |          |          |          |          |      |          |          |          |          |          |  |   |   |   |   |    |     |          |  |  |  |  |     |          |          |  |  |  |     |          |          |          |  |  |     |          |          |          |          |  |      |          |          |          |          |          |      |          |          |          |          |          |
|  <p>12. -2080.5941628 +20.5<br/>C<sub>1</sub> H/L 2.25</p> | <table border="1"> <thead> <tr> <th></th> <th>1</th> <th>2</th> <th>3</th> <th>4</th> <th>5</th> </tr> </thead> <tbody> <tr><td>1 B</td><td>0.000000</td><td></td><td></td><td></td><td></td></tr> <tr><td>2 B</td><td>1.919515</td><td>0.000000</td><td></td><td></td><td></td></tr> <tr><td>3 B</td><td>2.974688</td><td>1.864943</td><td>0.000000</td><td></td><td></td></tr> <tr><td>4 B</td><td>1.925824</td><td>3.128100</td><td>2.988530</td><td>0.000000</td><td></td></tr> <tr><td>5 Fe</td><td>2.204600</td><td>3.042263</td><td>3.181529</td><td>2.148225</td><td>0.000000</td></tr> <tr><td>6 B</td><td>2.664478</td><td>1.762658</td><td>1.771647</td><td>3.244784</td><td>2.229096</td></tr> <tr><td>7 B</td><td>3.246118</td><td>2.971536</td><td>1.791946</td><td>2.639571</td><td>2.189767</td></tr> <tr><td>8 C</td><td>3.000977</td><td>3.596508</td><td>2.761586</td><td>1.554860</td><td>1.989372</td></tr> <tr><td>9 B</td><td>3.134342</td><td>3.099146</td><td>1.803747</td><td>2.001033</td><td>3.080936</td></tr> <tr><td>10 P</td><td>1.950829</td><td>1.966660</td><td>2.003981</td><td>1.999940</td><td>3.278693</td></tr> <tr><td>11 B</td><td>1.686507</td><td>1.699191</td><td>2.936046</td><td>3.110593</td><td>2.032503</td></tr> <tr> <th></th> <th>6</th> <th>7</th> <th>8</th> <th>9</th> <th>10</th> </tr> <tr><td>6 B</td><td>0.000000</td><td></td><td></td><td></td><td></td></tr> <tr><td>7 B</td><td>1.817446</td><td>0.000000</td><td></td><td></td><td></td></tr> <tr><td>8 C</td><td>2.949964</td><td>1.581627</td><td>0.000000</td><td></td><td></td></tr> <tr><td>9 B</td><td>2.957555</td><td>1.793427</td><td>1.617461</td><td>0.000000</td><td></td></tr> <tr><td>10 P</td><td>2.956041</td><td>2.968589</td><td>2.848413</td><td>1.951104</td><td>0.000000</td></tr> <tr><td>11 B</td><td>1.692973</td><td>3.056053</td><td>3.493222</td><td>3.770262</td><td>3.020387</td></tr> </tbody> </table> |          | 1        | 2        | 3        | 4 | 5 | 1 B | 0.000000 |  |  |  |  | 2 B | 1.919515 | 0.000000 |  |  |  | 3 B | 2.974688 | 1.864943 | 0.000000 |  |  | 4 B | 1.925824 | 3.128100 | 2.988530 | 0.000000 |  | 5 Fe | 2.204600 | 3.042263 | 3.181529 | 2.148225 | 0.000000 | 6 B | 2.664478 | 1.762658 | 1.771647 | 3.244784 | 2.229096 | 7 B | 3.246118 | 2.971536 | 1.791946 | 2.639571 | 2.189767 | 8 C | 3.000977 | 3.596508 | 2.761586 | 1.554860 | 1.989372 | 9 B | 3.134342 | 3.099146 | 1.803747 | 2.001033 | 3.080936 | 10 P | 1.950829 | 1.966660 | 2.003981 | 1.999940 | 3.278693 | 11 B | 1.686507 | 1.699191 | 2.936046 | 3.110593 | 2.032503 |  | 6 | 7 | 8 | 9 | 10 | 6 B | 0.000000 |  |  |  |  | 7 B | 1.817446 | 0.000000 |  |  |  | 8 C | 2.949964 | 1.581627 | 0.000000 |  |  | 9 B | 2.957555 | 1.793427 | 1.617461 | 0.000000 |  | 10 P | 2.956041 | 2.968589 | 2.848413 | 1.951104 | 0.000000 | 11 B | 1.692973 | 3.056053 | 3.493222 | 3.770262 | 3.020387 |
|                                                                                                                                              | 1                                                                                                                                                                                                                                                                                                                                                                                                                                                                                                                                                                                                                                                                                                                                                                                                                                                                                                                                                                                                                                                                                                                                                                                                                                                                                                                                                                                                                                                                                                                                                                                                                                                                                                                                                                                                                                                                                                                                                      | 2        | 3        | 4        | 5        |   |   |     |          |  |  |  |  |     |          |          |  |  |  |     |          |          |          |  |  |     |          |          |          |          |  |      |          |          |          |          |          |     |          |          |          |          |          |     |          |          |          |          |          |     |          |          |          |          |          |     |          |          |          |          |          |      |          |          |          |          |          |      |          |          |          |          |          |  |   |   |   |   |    |     |          |  |  |  |  |     |          |          |  |  |  |     |          |          |          |  |  |     |          |          |          |          |  |      |          |          |          |          |          |      |          |          |          |          |          |
| 1 B                                                                                                                                          | 0.000000                                                                                                                                                                                                                                                                                                                                                                                                                                                                                                                                                                                                                                                                                                                                                                                                                                                                                                                                                                                                                                                                                                                                                                                                                                                                                                                                                                                                                                                                                                                                                                                                                                                                                                                                                                                                                                                                                                                                               |          |          |          |          |   |   |     |          |  |  |  |  |     |          |          |  |  |  |     |          |          |          |  |  |     |          |          |          |          |  |      |          |          |          |          |          |     |          |          |          |          |          |     |          |          |          |          |          |     |          |          |          |          |          |     |          |          |          |          |          |      |          |          |          |          |          |      |          |          |          |          |          |  |   |   |   |   |    |     |          |  |  |  |  |     |          |          |  |  |  |     |          |          |          |  |  |     |          |          |          |          |  |      |          |          |          |          |          |      |          |          |          |          |          |
| 2 B                                                                                                                                          | 1.919515                                                                                                                                                                                                                                                                                                                                                                                                                                                                                                                                                                                                                                                                                                                                                                                                                                                                                                                                                                                                                                                                                                                                                                                                                                                                                                                                                                                                                                                                                                                                                                                                                                                                                                                                                                                                                                                                                                                                               | 0.000000 |          |          |          |   |   |     |          |  |  |  |  |     |          |          |  |  |  |     |          |          |          |  |  |     |          |          |          |          |  |      |          |          |          |          |          |     |          |          |          |          |          |     |          |          |          |          |          |     |          |          |          |          |          |     |          |          |          |          |          |      |          |          |          |          |          |      |          |          |          |          |          |  |   |   |   |   |    |     |          |  |  |  |  |     |          |          |  |  |  |     |          |          |          |  |  |     |          |          |          |          |  |      |          |          |          |          |          |      |          |          |          |          |          |
| 3 B                                                                                                                                          | 2.974688                                                                                                                                                                                                                                                                                                                                                                                                                                                                                                                                                                                                                                                                                                                                                                                                                                                                                                                                                                                                                                                                                                                                                                                                                                                                                                                                                                                                                                                                                                                                                                                                                                                                                                                                                                                                                                                                                                                                               | 1.864943 | 0.000000 |          |          |   |   |     |          |  |  |  |  |     |          |          |  |  |  |     |          |          |          |  |  |     |          |          |          |          |  |      |          |          |          |          |          |     |          |          |          |          |          |     |          |          |          |          |          |     |          |          |          |          |          |     |          |          |          |          |          |      |          |          |          |          |          |      |          |          |          |          |          |  |   |   |   |   |    |     |          |  |  |  |  |     |          |          |  |  |  |     |          |          |          |  |  |     |          |          |          |          |  |      |          |          |          |          |          |      |          |          |          |          |          |
| 4 B                                                                                                                                          | 1.925824                                                                                                                                                                                                                                                                                                                                                                                                                                                                                                                                                                                                                                                                                                                                                                                                                                                                                                                                                                                                                                                                                                                                                                                                                                                                                                                                                                                                                                                                                                                                                                                                                                                                                                                                                                                                                                                                                                                                               | 3.128100 | 2.988530 | 0.000000 |          |   |   |     |          |  |  |  |  |     |          |          |  |  |  |     |          |          |          |  |  |     |          |          |          |          |  |      |          |          |          |          |          |     |          |          |          |          |          |     |          |          |          |          |          |     |          |          |          |          |          |     |          |          |          |          |          |      |          |          |          |          |          |      |          |          |          |          |          |  |   |   |   |   |    |     |          |  |  |  |  |     |          |          |  |  |  |     |          |          |          |  |  |     |          |          |          |          |  |      |          |          |          |          |          |      |          |          |          |          |          |
| 5 Fe                                                                                                                                         | 2.204600                                                                                                                                                                                                                                                                                                                                                                                                                                                                                                                                                                                                                                                                                                                                                                                                                                                                                                                                                                                                                                                                                                                                                                                                                                                                                                                                                                                                                                                                                                                                                                                                                                                                                                                                                                                                                                                                                                                                               | 3.042263 | 3.181529 | 2.148225 | 0.000000 |   |   |     |          |  |  |  |  |     |          |          |  |  |  |     |          |          |          |  |  |     |          |          |          |          |  |      |          |          |          |          |          |     |          |          |          |          |          |     |          |          |          |          |          |     |          |          |          |          |          |     |          |          |          |          |          |      |          |          |          |          |          |      |          |          |          |          |          |  |   |   |   |   |    |     |          |  |  |  |  |     |          |          |  |  |  |     |          |          |          |  |  |     |          |          |          |          |  |      |          |          |          |          |          |      |          |          |          |          |          |
| 6 B                                                                                                                                          | 2.664478                                                                                                                                                                                                                                                                                                                                                                                                                                                                                                                                                                                                                                                                                                                                                                                                                                                                                                                                                                                                                                                                                                                                                                                                                                                                                                                                                                                                                                                                                                                                                                                                                                                                                                                                                                                                                                                                                                                                               | 1.762658 | 1.771647 | 3.244784 | 2.229096 |   |   |     |          |  |  |  |  |     |          |          |  |  |  |     |          |          |          |  |  |     |          |          |          |          |  |      |          |          |          |          |          |     |          |          |          |          |          |     |          |          |          |          |          |     |          |          |          |          |          |     |          |          |          |          |          |      |          |          |          |          |          |      |          |          |          |          |          |  |   |   |   |   |    |     |          |  |  |  |  |     |          |          |  |  |  |     |          |          |          |  |  |     |          |          |          |          |  |      |          |          |          |          |          |      |          |          |          |          |          |
| 7 B                                                                                                                                          | 3.246118                                                                                                                                                                                                                                                                                                                                                                                                                                                                                                                                                                                                                                                                                                                                                                                                                                                                                                                                                                                                                                                                                                                                                                                                                                                                                                                                                                                                                                                                                                                                                                                                                                                                                                                                                                                                                                                                                                                                               | 2.971536 | 1.791946 | 2.639571 | 2.189767 |   |   |     |          |  |  |  |  |     |          |          |  |  |  |     |          |          |          |  |  |     |          |          |          |          |  |      |          |          |          |          |          |     |          |          |          |          |          |     |          |          |          |          |          |     |          |          |          |          |          |     |          |          |          |          |          |      |          |          |          |          |          |      |          |          |          |          |          |  |   |   |   |   |    |     |          |  |  |  |  |     |          |          |  |  |  |     |          |          |          |  |  |     |          |          |          |          |  |      |          |          |          |          |          |      |          |          |          |          |          |
| 8 C                                                                                                                                          | 3.000977                                                                                                                                                                                                                                                                                                                                                                                                                                                                                                                                                                                                                                                                                                                                                                                                                                                                                                                                                                                                                                                                                                                                                                                                                                                                                                                                                                                                                                                                                                                                                                                                                                                                                                                                                                                                                                                                                                                                               | 3.596508 | 2.761586 | 1.554860 | 1.989372 |   |   |     |          |  |  |  |  |     |          |          |  |  |  |     |          |          |          |  |  |     |          |          |          |          |  |      |          |          |          |          |          |     |          |          |          |          |          |     |          |          |          |          |          |     |          |          |          |          |          |     |          |          |          |          |          |      |          |          |          |          |          |      |          |          |          |          |          |  |   |   |   |   |    |     |          |  |  |  |  |     |          |          |  |  |  |     |          |          |          |  |  |     |          |          |          |          |  |      |          |          |          |          |          |      |          |          |          |          |          |
| 9 B                                                                                                                                          | 3.134342                                                                                                                                                                                                                                                                                                                                                                                                                                                                                                                                                                                                                                                                                                                                                                                                                                                                                                                                                                                                                                                                                                                                                                                                                                                                                                                                                                                                                                                                                                                                                                                                                                                                                                                                                                                                                                                                                                                                               | 3.099146 | 1.803747 | 2.001033 | 3.080936 |   |   |     |          |  |  |  |  |     |          |          |  |  |  |     |          |          |          |  |  |     |          |          |          |          |  |      |          |          |          |          |          |     |          |          |          |          |          |     |          |          |          |          |          |     |          |          |          |          |          |     |          |          |          |          |          |      |          |          |          |          |          |      |          |          |          |          |          |  |   |   |   |   |    |     |          |  |  |  |  |     |          |          |  |  |  |     |          |          |          |  |  |     |          |          |          |          |  |      |          |          |          |          |          |      |          |          |          |          |          |
| 10 P                                                                                                                                         | 1.950829                                                                                                                                                                                                                                                                                                                                                                                                                                                                                                                                                                                                                                                                                                                                                                                                                                                                                                                                                                                                                                                                                                                                                                                                                                                                                                                                                                                                                                                                                                                                                                                                                                                                                                                                                                                                                                                                                                                                               | 1.966660 | 2.003981 | 1.999940 | 3.278693 |   |   |     |          |  |  |  |  |     |          |          |  |  |  |     |          |          |          |  |  |     |          |          |          |          |  |      |          |          |          |          |          |     |          |          |          |          |          |     |          |          |          |          |          |     |          |          |          |          |          |     |          |          |          |          |          |      |          |          |          |          |          |      |          |          |          |          |          |  |   |   |   |   |    |     |          |  |  |  |  |     |          |          |  |  |  |     |          |          |          |  |  |     |          |          |          |          |  |      |          |          |          |          |          |      |          |          |          |          |          |
| 11 B                                                                                                                                         | 1.686507                                                                                                                                                                                                                                                                                                                                                                                                                                                                                                                                                                                                                                                                                                                                                                                                                                                                                                                                                                                                                                                                                                                                                                                                                                                                                                                                                                                                                                                                                                                                                                                                                                                                                                                                                                                                                                                                                                                                               | 1.699191 | 2.936046 | 3.110593 | 2.032503 |   |   |     |          |  |  |  |  |     |          |          |  |  |  |     |          |          |          |  |  |     |          |          |          |          |  |      |          |          |          |          |          |     |          |          |          |          |          |     |          |          |          |          |          |     |          |          |          |          |          |     |          |          |          |          |          |      |          |          |          |          |          |      |          |          |          |          |          |  |   |   |   |   |    |     |          |  |  |  |  |     |          |          |  |  |  |     |          |          |          |  |  |     |          |          |          |          |  |      |          |          |          |          |          |      |          |          |          |          |          |
|                                                                                                                                              | 6                                                                                                                                                                                                                                                                                                                                                                                                                                                                                                                                                                                                                                                                                                                                                                                                                                                                                                                                                                                                                                                                                                                                                                                                                                                                                                                                                                                                                                                                                                                                                                                                                                                                                                                                                                                                                                                                                                                                                      | 7        | 8        | 9        | 10       |   |   |     |          |  |  |  |  |     |          |          |  |  |  |     |          |          |          |  |  |     |          |          |          |          |  |      |          |          |          |          |          |     |          |          |          |          |          |     |          |          |          |          |          |     |          |          |          |          |          |     |          |          |          |          |          |      |          |          |          |          |          |      |          |          |          |          |          |  |   |   |   |   |    |     |          |  |  |  |  |     |          |          |  |  |  |     |          |          |          |  |  |     |          |          |          |          |  |      |          |          |          |          |          |      |          |          |          |          |          |
| 6 B                                                                                                                                          | 0.000000                                                                                                                                                                                                                                                                                                                                                                                                                                                                                                                                                                                                                                                                                                                                                                                                                                                                                                                                                                                                                                                                                                                                                                                                                                                                                                                                                                                                                                                                                                                                                                                                                                                                                                                                                                                                                                                                                                                                               |          |          |          |          |   |   |     |          |  |  |  |  |     |          |          |  |  |  |     |          |          |          |  |  |     |          |          |          |          |  |      |          |          |          |          |          |     |          |          |          |          |          |     |          |          |          |          |          |     |          |          |          |          |          |     |          |          |          |          |          |      |          |          |          |          |          |      |          |          |          |          |          |  |   |   |   |   |    |     |          |  |  |  |  |     |          |          |  |  |  |     |          |          |          |  |  |     |          |          |          |          |  |      |          |          |          |          |          |      |          |          |          |          |          |
| 7 B                                                                                                                                          | 1.817446                                                                                                                                                                                                                                                                                                                                                                                                                                                                                                                                                                                                                                                                                                                                                                                                                                                                                                                                                                                                                                                                                                                                                                                                                                                                                                                                                                                                                                                                                                                                                                                                                                                                                                                                                                                                                                                                                                                                               | 0.000000 |          |          |          |   |   |     |          |  |  |  |  |     |          |          |  |  |  |     |          |          |          |  |  |     |          |          |          |          |  |      |          |          |          |          |          |     |          |          |          |          |          |     |          |          |          |          |          |     |          |          |          |          |          |     |          |          |          |          |          |      |          |          |          |          |          |      |          |          |          |          |          |  |   |   |   |   |    |     |          |  |  |  |  |     |          |          |  |  |  |     |          |          |          |  |  |     |          |          |          |          |  |      |          |          |          |          |          |      |          |          |          |          |          |
| 8 C                                                                                                                                          | 2.949964                                                                                                                                                                                                                                                                                                                                                                                                                                                                                                                                                                                                                                                                                                                                                                                                                                                                                                                                                                                                                                                                                                                                                                                                                                                                                                                                                                                                                                                                                                                                                                                                                                                                                                                                                                                                                                                                                                                                               | 1.581627 | 0.000000 |          |          |   |   |     |          |  |  |  |  |     |          |          |  |  |  |     |          |          |          |  |  |     |          |          |          |          |  |      |          |          |          |          |          |     |          |          |          |          |          |     |          |          |          |          |          |     |          |          |          |          |          |     |          |          |          |          |          |      |          |          |          |          |          |      |          |          |          |          |          |  |   |   |   |   |    |     |          |  |  |  |  |     |          |          |  |  |  |     |          |          |          |  |  |     |          |          |          |          |  |      |          |          |          |          |          |      |          |          |          |          |          |
| 9 B                                                                                                                                          | 2.957555                                                                                                                                                                                                                                                                                                                                                                                                                                                                                                                                                                                                                                                                                                                                                                                                                                                                                                                                                                                                                                                                                                                                                                                                                                                                                                                                                                                                                                                                                                                                                                                                                                                                                                                                                                                                                                                                                                                                               | 1.793427 | 1.617461 | 0.000000 |          |   |   |     |          |  |  |  |  |     |          |          |  |  |  |     |          |          |          |  |  |     |          |          |          |          |  |      |          |          |          |          |          |     |          |          |          |          |          |     |          |          |          |          |          |     |          |          |          |          |          |     |          |          |          |          |          |      |          |          |          |          |          |      |          |          |          |          |          |  |   |   |   |   |    |     |          |  |  |  |  |     |          |          |  |  |  |     |          |          |          |  |  |     |          |          |          |          |  |      |          |          |          |          |          |      |          |          |          |          |          |
| 10 P                                                                                                                                         | 2.956041                                                                                                                                                                                                                                                                                                                                                                                                                                                                                                                                                                                                                                                                                                                                                                                                                                                                                                                                                                                                                                                                                                                                                                                                                                                                                                                                                                                                                                                                                                                                                                                                                                                                                                                                                                                                                                                                                                                                               | 2.968589 | 2.848413 | 1.951104 | 0.000000 |   |   |     |          |  |  |  |  |     |          |          |  |  |  |     |          |          |          |  |  |     |          |          |          |          |  |      |          |          |          |          |          |     |          |          |          |          |          |     |          |          |          |          |          |     |          |          |          |          |          |     |          |          |          |          |          |      |          |          |          |          |          |      |          |          |          |          |          |  |   |   |   |   |    |     |          |  |  |  |  |     |          |          |  |  |  |     |          |          |          |  |  |     |          |          |          |          |  |      |          |          |          |          |          |      |          |          |          |          |          |
| 11 B                                                                                                                                         | 1.692973                                                                                                                                                                                                                                                                                                                                                                                                                                                                                                                                                                                                                                                                                                                                                                                                                                                                                                                                                                                                                                                                                                                                                                                                                                                                                                                                                                                                                                                                                                                                                                                                                                                                                                                                                                                                                                                                                                                                               | 3.056053 | 3.493222 | 3.770262 | 3.020387 |   |   |     |          |  |  |  |  |     |          |          |  |  |  |     |          |          |          |  |  |     |          |          |          |          |  |      |          |          |          |          |          |     |          |          |          |          |          |     |          |          |          |          |          |     |          |          |          |          |          |     |          |          |          |          |          |      |          |          |          |          |          |      |          |          |          |          |          |  |   |   |   |   |    |     |          |  |  |  |  |     |          |          |  |  |  |     |          |          |          |  |  |     |          |          |          |          |  |      |          |          |          |          |          |      |          |          |          |          |          |

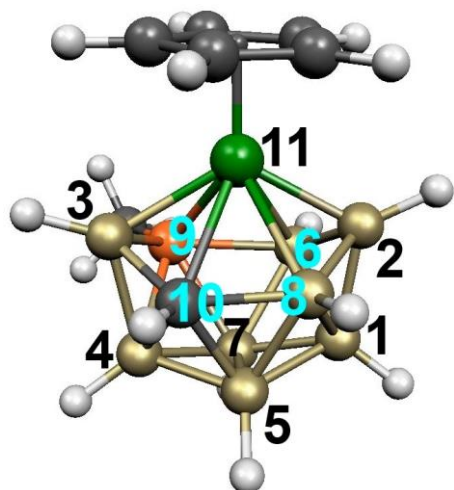

13. -2080.5936576 +20.9  
C<sub>1</sub> H/L 2.06

|    | 1  | 2        | 3        | 4        | 5        |          |
|----|----|----------|----------|----------|----------|----------|
| 1  | B  | 0.000000 |          |          |          |          |
| 2  | B  | 1.730800 | 0.000000 |          |          |          |
| 3  | B  | 3.696445 | 3.602379 | 0.000000 |          |          |
| 4  | B  | 2.931241 | 3.713997 | 1.831868 | 0.000000 |          |
| 5  | B  | 1.754725 | 2.893766 | 2.886372 | 1.714949 | 0.000000 |
| 6  | B  | 1.774324 | 1.686836 | 3.245489 | 3.070452 | 2.853229 |
| 7  | B  | 1.761114 | 2.931789 | 3.012122 | 1.803858 | 1.786118 |
| 8  | B  | 1.803317 | 1.692597 | 2.973793 | 2.886152 | 1.777004 |
| 9  | P  | 3.053946 | 3.143389 | 1.855634 | 2.032625 | 2.974343 |
| 10 | C  | 2.790148 | 2.967367 | 1.585584 | 1.690038 | 1.682431 |
| 11 | Fe | 3.057534 | 2.022766 | 2.101565 | 3.168821 | 3.241929 |
|    | 6  | 7        | 8        | 9        | 10       |          |
| 6  | B  | 0.000000 |          |          |          |          |
| 7  | B  | 1.866719 | 0.000000 |          |          |          |
| 8  | B  | 2.639780 | 2.814052 | 0.000000 |          |          |
| 9  | P  | 1.970269 | 1.983285 | 3.274894 | 0.000000 |          |
| 10 | C  | 3.136461 | 2.690625 | 1.713399 | 2.624271 | 0.000000 |
| 11 | Fe | 2.303817 | 3.266681 | 2.242756 | 2.276683 | 2.265365 |

Table S4C. Energy ranking for all of the CpFeCHPHB<sub>8</sub>H<sub>8</sub> optimized structures:

| No | Initial structure               | Final energy (a.u.) | ΔE (kcal/mol) |
|----|---------------------------------|---------------------|---------------|
| 1  | 02b-TricapCubeA-Fe2P3C1         | -2041.3248836       | 0.00          |
| 2  | 03b-TricapCubeB-Fe4P1C8         | -2041.3248444       | 0.02          |
| 3  | 04a-Icos-1vx-Fe1C1P6            | -2041.3248174       | 0.04          |
| 4  | 01b-PentaCapTriPri-Fe1P1C6      | -2041.3248046       | 0.05          |
| 5  | 03a-TricapCubeB-Fe3C2P2         | -2041.3248036       | 0.05          |
| 6  | 03b-TricapCubeB-Fe3P4C2         | -2041.3247964       | 0.05          |
| 7  | 03b-TricapCubeB-Fe1P1C8         | -2041.3247857       | 0.06          |
| 8  | 02b-TricapCubeA-Fe3P3C2         | -2041.3247800       | 0.07          |
| 9  | 01a-PentaCapTriPri-Fe1C1P6_r-11 | -2041.3247708       | 0.07          |
| 10 | 02b-TricapCubeA-Fe2P1C6         | -2041.3247674       | 0.07          |
| 11 | 01a-PentaCapTriPri-Fe1C1P6_i-11 | -2041.3247601       | 0.08          |
| 12 | 04a-Icos-1vx-Fe2C1P4            | -2041.3247493       | 0.08          |
| 13 | 03a-TricapCubeB-Fe4C4P2         | -2041.3247353       | 0.09          |
| 14 | 03a-TricapCubeB-Fe3C1P8         | -2041.3247349       | 0.09          |
| 15 | 02a-TricapCubeA-Fe1C1P5         | -2041.3247336       | 0.09          |
| 16 | 04b-Icos-1vx-Fe5P2C5            | -2041.3247288       | 0.10          |
| 17 | 01a-PentaCapTriPri-Fe1C2P5      | -2041.3247219       | 0.10          |
| 18 | 02a-TricapCubeA-Fe2C3P1         | -2041.3247178       | 0.10          |
| 19 | 03a-TricapCubeB-Fe1C1P8         | -2041.3247060       | 0.11          |
| 20 | 04b-Icos-1vx-Fe1P1C6            | -2041.3246925       | 0.12          |
| 21 | 02a-TricapCubeA-Fe3C3P7         | -2041.3246784       | 0.13          |
| 22 | 04b-Icos-1vx-Fe3P1C5_r-10       | -2041.3246759       | 0.13          |
| 23 | 02a-TricapCubeA-Fe2C1P4         | -2041.3246731       | 0.13          |
| 24 | 04b-Icos-1vx-Fe5P1C7            | -2041.3246670       | 0.14          |
| 25 | 04b-Icos-1vx-Fe2P1C3            | -2041.3246658       | 0.14          |
| 26 | 04b-Icos-1vx-Fe3P1C5_i-10       | -2041.3246572       | 0.14          |
| 27 | 02b-TricapCubeA-Fe4P3C1         | -2041.3246397       | 0.15          |
| 28 | 03a-TricapCubeB-Fe4C1P8         | -2041.3246357       | 0.16          |
| 29 | 02a-TricapCubeA-Fe4C3P1         | -2041.3246346       | 0.16          |
| 30 | 04a-Icos-1vx-Fe3C1P5            | -2041.3246332       | 0.16          |
| 31 | 03a-TricapCubeB-Fe4C2P6         | -2041.3246318       | 0.16          |
| 32 | 02b-TricapCubeA-Fe1P1C5_r-24    | -2041.3246195       | 0.17          |
| 33 | 02b-TricapCubeA-Fe1P1C5_i-24    | -2041.3246002       | 0.18          |
| 34 | 03b-TricapCubeB-Fe4P4C2         | -2041.3244615       | 0.26          |
| 35 | 04a-Icos-1vx-Fe3C1P4            | -2041.3233174       | 0.98          |
| 36 | 04b-Icos-1vx-Fe5P1C5            | -2041.3232897       | 1.00          |
| 37 | 02a-TricapCubeA-Fe1C1P9         | -2041.3232868       | 1.00          |
| 38 | 02b-TricapCubeA-Fe3P8C1         | -2041.3232817       | 1.01          |
| 39 | 01b-PentaCapTriPri-Fe1P1C8      | -2041.3232682       | 1.01          |

|    |                                 |               |       |
|----|---------------------------------|---------------|-------|
| 40 | 04a-Icos-1vx-Fe3C2P4            | -2041.3232625 | 1.02  |
| 41 | 02b-TricapCubeA-Fe1P1C1         | -2041.3232609 | 1.02  |
| 42 | 02b-TricapCubeA-Fe4P1C1         | -2041.3232571 | 1.02  |
| 43 | 04a-Icos-1vx-Fe3C6P1            | -2041.3232533 | 1.02  |
| 44 | 01b-PentaCapTriPri-Fe1P2C5_r-11 | -2041.3232494 | 1.03  |
| 45 | 01b-PentaCapTriPri-Fe1P2C4      | -2041.3232437 | 1.03  |
| 46 | 03b-TricapCubeB-Fe1P3C6         | -2041.3232406 | 1.03  |
| 47 | 04a-Icos-1vx-Fe5C2P4            | -2041.3232363 | 1.03  |
| 48 | 02b-TricapCubeA-Fe3P1C9         | -2041.3232351 | 1.03  |
| 49 | 03a-TricapCubeB-Fe3C4P2         | -2041.3232260 | 1.04  |
| 50 | 04a-Icos-1vx-Fe1C3P7            | -2041.3232216 | 1.04  |
| 51 | 04b-Icos-1vx-Fe2P4C1            | -2041.3232197 | 1.04  |
| 52 | 02b-TricapCubeA-Fe4P4C3         | -2041.3232160 | 1.05  |
| 53 | 04a-Icos-1vx-Fe5C1P1            | -2041.3232105 | 1.05  |
| 54 | 02b-TricapCubeA-Fe3P1C7_r-43    | -2041.3232030 | 1.05  |
| 55 | 04b-Icos-1vx-Fe3P1C6            | -2041.3231961 | 1.06  |
| 56 | 03a-TricapCubeB-Fe1C1P7         | -2041.3231946 | 1.06  |
| 57 | 03b-TricapCubeB-Fe1P3C1         | -2041.3231898 | 1.06  |
| 58 | 04b-Icos-1vx-Fe4P1C2            | -2041.3231890 | 1.06  |
| 59 | 03a-TricapCubeB-Fe3C2P4         | -2041.3231865 | 1.06  |
| 60 | 02a-TricapCubeA-Fe1C2P2         | -2041.3231827 | 1.07  |
| 61 | 02b-TricapCubeA-Fe4P2C2         | -2041.3231766 | 1.07  |
| 62 | 01a-PentaCapTriPri-Fe2C5P4      | -2041.3231665 | 1.08  |
| 63 | 04a-Icos-1vx-Fe1C1P5            | -2041.3231514 | 1.09  |
| 64 | 04b-Icos-1vx-Fe2P2C3            | -2041.3231442 | 1.09  |
| 65 | 03a-TricapCubeB-Fe3C1P5         | -2041.3230463 | 1.15  |
| 66 | 01b-PentaCapTriPri-Fe1P2C5_i-11 | -2041.3229776 | 1.20  |
| 67 | 02a-TricapCubeA-Fe4C8P1         | -2041.3082073 | 10.46 |
| 68 | 02b-TricapCubeA-Fe2P3C7         | -2041.3081981 | 10.47 |
| 69 | 02a-TricapCubeA-Fe2C5P1         | -2041.3081733 | 10.49 |
| 70 | 03a-TricapCubeB-Fe4C4P3         | -2041.3081659 | 10.49 |
| 71 | 01a-PentaCapTriPri-Fe1C2P3      | -2041.3081599 | 10.49 |
| 72 | 02b-TricapCubeA-Fe3P4C5         | -2041.3081517 | 10.50 |
| 73 | 04b-Icos-1vx-Fe3P7C2            | -2041.3081322 | 10.51 |
| 74 | 03a-TricapCubeB-Fe3C2P3         | -2041.3081283 | 10.51 |
| 75 | 04a-Icos-1vx-Fe3C5P4            | -2041.3081267 | 10.52 |
| 76 | 04a-Icos-1vx-Fe4C1P6            | -2041.3081207 | 10.52 |
| 77 | 04b-Icos-1vx-Fe5P1C4            | -2041.3081190 | 10.52 |
| 78 | 02a-TricapCubeA-Fe4C4P6         | -2041.3081179 | 10.52 |
| 79 | 03b-TricapCubeB-Fe2P4C3         | -2041.3081125 | 10.52 |
| 80 | 02b-TricapCubeA-Fe3P1C3         | -2041.3081118 | 10.52 |
| 81 | 02b-TricapCubeA-Fe4P6C2         | -2041.3081017 | 10.53 |

|     |                            |               |       |
|-----|----------------------------|---------------|-------|
| 82  | 03a-TricapCubeB-Fe3C5P1    | -2041.3080998 | 10.53 |
| 83  | 02a-TricapCubeA-Fe3C6P2    | -2041.3080987 | 10.53 |
| 84  | 03a-TricapCubeB-Fe2C5P2    | -2041.3080961 | 10.53 |
| 85  | 04b-Icos-1vx-Fe4P4C3       | -2041.3080959 | 10.53 |
| 86  | 04b-Icos-1vx-Fe3P6C3       | -2041.3080936 | 10.54 |
| 87  | 03b-TricapCubeB-Fe1P5C2    | -2041.3080916 | 10.54 |
| 88  | 01a-PentaCapTriPri-Fe2C4P3 | -2041.3080892 | 10.54 |
| 89  | 03b-TricapCubeB-Fe3P2C5    | -2041.3071968 | 11.10 |
| 90  | 02b-TricapCubeA-Fe1P3C7    | -2041.3071966 | 11.10 |
| 91  | 02a-TricapCubeA-Fe4C4P3    | -2041.3071835 | 11.11 |
| 92  | 03a-TricapCubeB-Fe4C2P7    | -2041.3071783 | 11.11 |
| 93  | 04b-Icos-1vx-Fe3P4C2       | -2041.3071756 | 11.11 |
| 94  | 04b-Icos-1vx-Fe5P4C4       | -2041.3071694 | 11.12 |
| 95  | 03b-TricapCubeB-Fe3P1C5    | -2041.3071651 | 11.12 |
| 96  | 03b-TricapCubeB-Fe4P3C3    | -2041.3071624 | 11.12 |
| 97  | 04a-Icos-1vx-Fe5C3P4       | -2041.3071617 | 11.12 |
| 98  | 02a-TricapCubeA-Fe4C2P2    | -2041.3071606 | 11.12 |
| 99  | 02b-TricapCubeA-Fe4P6C3    | -2041.3071605 | 11.12 |
| 100 | 04a-Icos-1vx-Fe5C1P9       | -2041.3071440 | 11.13 |
| 101 | 03a-TricapCubeB-Fe4C2P2    | -2041.3071399 | 11.13 |
| 102 | 04b-Icos-1vx-Fe4P1C4       | -2041.3071382 | 11.14 |
| 103 | 04b-Icos-1vx-Fe5P2C3       | -2041.3071065 | 11.16 |
| 104 | 03a-TricapCubeB-Fe1C3P1    | -2041.3071063 | 11.16 |
| 105 | 02b-TricapCubeA-Fe1P1C8    | -2041.3071057 | 11.16 |
| 106 | 03a-TricapCubeB-Fe4C1P4    | -2041.3070902 | 11.17 |
| 107 | 04b-Icos-1vx-Fe5P2C7       | -2041.3070774 | 11.17 |
| 108 | 04a-Icos-1vx-Fe3C5P5       | -2041.3070747 | 11.18 |
| 109 | 02a-TricapCubeA-Fe3C7P2    | -2041.3070711 | 11.18 |
| 110 | 03b-TricapCubeB-Fe3P3C1    | -2041.3070414 | 11.20 |
| 111 | 03b-TricapCubeB-Fe4P2C3    | -2041.3056179 | 12.09 |
| 112 | 04a-Icos-1vx-Fe3C3P5       | -2041.3056088 | 12.10 |
| 113 | 02a-TricapCubeA-Fe4C2P7    | -2041.3056032 | 12.10 |
| 114 | 02b-TricapCubeA-Fe4P2C7    | -2041.3055931 | 12.11 |
| 115 | 02a-TricapCubeA-Fe2C4P1    | -2041.3055887 | 12.11 |
| 116 | 03a-TricapCubeB-Fe3C1P7    | -2041.3055845 | 12.11 |
| 117 | 03a-TricapCubeB-Fe3C3P5    | -2041.3055663 | 12.12 |
| 118 | 02b-TricapCubeA-Fe3P5C5    | -2041.3055655 | 12.12 |
| 119 | 04a-Icos-1vx-Fe5C3P6       | -2041.3055628 | 12.12 |
| 120 | 03a-TricapCubeB-Fe2C2P8    | -2041.3055623 | 12.12 |
| 121 | 02b-TricapCubeA-Fe2P2C5    | -2041.3055556 | 12.13 |
| 122 | 03a-TricapCubeB-Fe2C2P4    | -2041.3055532 | 12.13 |
| 123 | 04b-Icos-1vx-Fe3P4C6       | -2041.3055531 | 12.13 |

|     |                            |               |       |
|-----|----------------------------|---------------|-------|
| 124 | 04a-Icos-1vx-Fe4C2P3       | -2041.3055516 | 12.13 |
| 125 | 03b-TricapCubeB-Fe2P2C8    | -2041.3055453 | 12.14 |
| 126 | 02a-TricapCubeA-Fe1C2P3    | -2041.3055439 | 12.14 |
| 127 | 03b-TricapCubeB-Fe3P1C6    | -2041.3055365 | 12.14 |
| 128 | 02b-TricapCubeA-Fe1P2C3    | -2041.3055343 | 12.14 |
| 129 | 04a-Icos-1vx-Fe2C1P5       | -2041.3055303 | 12.14 |
| 130 | 02b-TricapCubeA-Fe4P7C1    | -2041.3055279 | 12.15 |
| 131 | 02a-TricapCubeA-Fe2C2P5    | -2041.3055212 | 12.15 |
| 132 | 04b-Icos-1vx-Fe1P2C3       | -2041.3055200 | 12.15 |
| 133 | 01b-PentaCapTriPri-Fe2P5C4 | -2041.3055181 | 12.15 |
| 134 | 02a-TricapCubeA-Fe2C2P2    | -2041.3055154 | 12.15 |
| 135 | 02a-TricapCubeA-Fe4C5P5    | -2041.3055074 | 12.16 |
| 136 | 02b-TricapCubeA-Fe2P2C2    | -2041.3055060 | 12.16 |
| 137 | 03a-TricapCubeB-Fe3C1P6    | -2041.3055051 | 12.16 |
| 138 | 04b-Icos-1vx-Fe3P3C2       | -2041.3055015 | 12.16 |
| 139 | 04b-Icos-1vx-Fe4P2C3       | -2041.3055009 | 12.16 |
| 140 | 04b-Icos-1vx-Fe5P3C6       | -2041.3054991 | 12.16 |
| 141 | 02a-TricapCubeA-Fe1C3P4    | -2041.3054916 | 12.17 |
| 142 | 04a-Icos-1vx-Fe3C4P6       | -2041.3054873 | 12.17 |
| 143 | 02b-TricapCubeA-Fe1P3C4    | -2041.3054720 | 12.18 |
| 144 | 02b-TricapCubeA-Fe2P1C7    | -2041.3054653 | 12.19 |
| 145 | 03a-TricapCubeB-Fe4C1P5    | -2041.3054615 | 12.19 |
| 146 | 03b-TricapCubeB-Fe4P1C5    | -2041.3054537 | 12.19 |
| 147 | 02a-TricapCubeA-Fe1C1P1    | -2041.3054508 | 12.19 |
| 148 | 04b-Icos-1vx-Fe5P2C4       | -2041.3054420 | 12.20 |
| 149 | 04b-Icos-1vx-Fe2P2C2       | -2041.3054268 | 12.21 |
| 150 | 04b-Icos-1vx-Fe5P1C1       | -2041.3054256 | 12.21 |
| 151 | 04b-Icos-1vx-Fe3P1C4       | -2041.3054253 | 12.21 |
| 152 | 02b-TricapCubeA-Fe2P1C5    | -2041.3054090 | 12.22 |
| 153 | 03b-TricapCubeB-Fe1P1C7    | -2041.3054086 | 12.22 |
| 154 | 01a-PentaCapTriPri-Fe1C1P8 | -2041.3054025 | 12.22 |
| 155 | 02a-TricapCubeA-Fe3C1P7    | -2041.3053941 | 12.23 |
| 156 | 04b-Icos-1vx-Fe3P6C1       | -2041.3053929 | 12.23 |
| 157 | 01a-PentaCapTriPri-Fe1C2P4 | -2041.3053923 | 12.23 |
| 158 | 04a-Icos-1vx-Fe2C2P3       | -2041.3052896 | 12.30 |
| 159 | 02b-TricapCubeA-Fe3P3C4    | -2041.3014044 | 14.73 |
| 160 | 01b-PentaCapTriPri-Fe2P2C1 | -2041.3013389 | 14.77 |
| 161 | 03b-TricapCubeB-Fe3P1C9    | -2041.3013377 | 14.78 |
| 162 | 03a-TricapCubeB-Fe4C5P1    | -2041.3013374 | 14.78 |
| 163 | 03b-TricapCubeB-Fe4P2C8    | -2041.3013225 | 14.79 |
| 164 | 01b-PentaCapTriPri-Fe1P1C4 | -2041.3013129 | 14.79 |
| 165 | 03b-TricapCubeB-Fe4P3C5    | -2041.3012975 | 14.80 |

|     |                            |               |       |
|-----|----------------------------|---------------|-------|
| 166 | 04b-Icos-1vx-Fe1P2C5       | -2041.3012951 | 14.80 |
| 167 | 04b-Icos-1vx-Fe4P3C2       | -2041.3012940 | 14.80 |
| 168 | 04a-Icos-1vx-Fe2C4P1       | -2041.3012812 | 14.81 |
| 169 | 02a-TricapCubeA-Fe3C4P1    | -2041.3012736 | 14.82 |
| 170 | 04a-Icos-1vx-Fe1C1P3       | -2041.3012610 | 14.82 |
| 171 | 04a-Icos-1vx-Fe3C1P9       | -2041.3012564 | 14.83 |
| 172 | 04b-Icos-1vx-Fe5P2C6       | -2041.3012280 | 14.84 |
| 173 | 02a-TricapCubeA-Fe4C1P1    | -2041.3012236 | 14.85 |
| 174 | 03b-TricapCubeB-Fe4P1C7    | -2041.3012233 | 14.85 |
| 175 | 04a-Icos-1vx-Fe3C1P6       | -2041.3012232 | 14.85 |
| 176 | 03a-TricapCubeB-Fe2C1P8    | -2041.3012140 | 14.85 |
| 177 | 03a-TricapCubeB-Fe4C1P7    | -2041.3012130 | 14.85 |
| 178 | 04a-Icos-1vx-Fe5C2P6       | -2041.3012068 | 14.86 |
| 179 | 04b-Icos-1vx-Fe1P1C5       | -2041.3011944 | 14.87 |
| 180 | 02b-TricapCubeA-Fe1P1C9    | -2041.3011919 | 14.87 |
| 181 | 04b-Icos-1vx-Fe1P3C7       | -2041.3011754 | 14.88 |
| 182 | 04a-Icos-1vx-Fe1C3P2       | -2041.3007289 | 15.16 |
| 183 | 03a-TricapCubeB-Fe1C4P1    | -2041.3007184 | 15.16 |
| 184 | 03a-TricapCubeB-Fe1C3P5    | -2041.3006879 | 15.18 |
| 185 | 04b-Icos-1vx-Fe3P2C3       | -2041.3006712 | 15.19 |
| 186 | 04a-Icos-1vx-Fe3C4P3       | -2041.3006692 | 15.20 |
| 187 | 02b-TricapCubeA-Fe4P1C6    | -2041.3006661 | 15.20 |
| 188 | 04a-Icos-1vx-Fe3C2P3       | -2041.3006566 | 15.20 |
| 189 | 04b-Icos-1vx-Fe1P3C2       | -2041.3006274 | 15.22 |
| 190 | 03a-TricapCubeB-Fe1C3P7    | -2041.2988639 | 16.33 |
| 191 | 03b-TricapCubeB-Fe2P3C7    | -2041.2988328 | 16.35 |
| 192 | 03b-TricapCubeB-Fe1P4C1    | -2041.2988003 | 16.37 |
| 193 | 02b-TricapCubeA-Fe3P1C8    | -2041.2987878 | 16.38 |
| 194 | 03b-TricapCubeB-Fe2P2C7    | -2041.2987701 | 16.39 |
| 195 | 04b-Icos-1vx-Fe3P4C3       | -2041.2987670 | 16.39 |
| 196 | 02a-TricapCubeA-Fe4C4P1    | -2041.2986894 | 16.44 |
| 197 | 03b-TricapCubeB-Fe2P4C2    | -2041.2986708 | 16.45 |
| 198 | 04b-Icos-1vx-Fe4P3C5       | -2041.2984225 | 16.60 |
| 199 | 04b-Icos-1vx-Fe4P1C8       | -2041.2983895 | 16.63 |
| 200 | 01a-PentaCapTriPri-Fe2C1P4 | -2041.2983708 | 16.64 |
| 201 | 03a-TricapCubeB-Fe2C4P1    | -2041.2983704 | 16.64 |
| 202 | 02a-TricapCubeA-Fe4C4P4    | -2041.2983642 | 16.64 |
| 203 | 02b-TricapCubeA-Fe2P1C1    | -2041.2983631 | 16.64 |
| 204 | 04a-Icos-1vx-Fe4C3P1       | -2041.2983566 | 16.65 |
| 205 | 03a-TricapCubeB-Fe2C3P5    | -2041.2983539 | 16.65 |
| 206 | 03b-TricapCubeB-Fe1P3C5    | -2041.2983425 | 16.66 |
| 207 | 03b-TricapCubeB-Fe4P1C9    | -2041.2983395 | 16.66 |

|     |                         |               |       |
|-----|-------------------------|---------------|-------|
| 208 | 02a-TricapCubeA-Fe4C1P6 | -2041.2983388 | 16.66 |
| 209 | 04a-Icos-1vx-Fe5C4P3    | -2041.2983352 | 16.66 |
| 210 | 02b-TricapCubeA-Fe1P1C6 | -2041.2983235 | 16.67 |
| 211 | 03b-TricapCubeB-Fe3P3C6 | -2041.2983165 | 16.67 |
| 212 | 04b-Icos-1vx-Fe5P2C8    | -2041.2982996 | 16.68 |
| 213 | 03b-TricapCubeB-Fe3P2C8 | -2041.2982793 | 16.69 |
| 214 | 04a-Icos-1vx-Fe5C3P5    | -2041.2982790 | 16.69 |
| 215 | 02a-TricapCubeA-Fe4C3P5 | -2041.2982630 | 16.70 |
| 216 | 02b-TricapCubeA-Fe1P3C6 | -2041.2982420 | 16.72 |
| 217 | 02a-TricapCubeA-Fe3C3P4 | -2041.2954866 | 18.45 |
| 218 | 03b-TricapCubeB-Fe3P5C1 | -2041.2954304 | 18.48 |
| 219 | 04b-Icos-1vx-Fe1P1C3    | -2041.2954219 | 18.49 |
| 220 | 04a-Icos-1vx-Fe3C3P3    | -2041.2954094 | 18.50 |
| 221 | 02b-TricapCubeA-Fe4P4C1 | -2041.2954009 | 18.50 |
| 222 | 02b-TricapCubeA-Fe4P3C5 | -2041.2954004 | 18.50 |
| 223 | 03b-TricapCubeB-Fe4P5C1 | -2041.2953725 | 18.52 |
| 224 | 04a-Icos-1vx-Fe1C2P5    | -2041.2952742 | 18.58 |
| 225 | 03b-TricapCubeB-Fe4P4C3 | -2041.2952046 | 18.62 |
| 226 | 03a-TricapCubeB-Fe2C2P3 | -2041.2949631 | 18.78 |
| 227 | 03b-TricapCubeB-Fe4P2C7 | -2041.2949370 | 18.79 |
| 228 | 03a-TricapCubeB-Fe2C2P6 | -2041.2949165 | 18.80 |
| 229 | 03a-TricapCubeB-Fe2C1P5 | -2041.2949057 | 18.81 |
| 230 | 04b-Icos-1vx-Fe4P3C7    | -2041.2948667 | 18.84 |
| 231 | 02b-TricapCubeA-Fe4P2C5 | -2041.2948404 | 18.85 |
| 232 | 04b-Icos-1vx-Fe4P2C7    | -2041.2948144 | 18.87 |
| 233 | 02a-TricapCubeA-Fe4C1P5 | -2041.2948098 | 18.87 |
| 234 | 04a-Icos-1vx-Fe3C2P2    | -2041.2947987 | 18.88 |
| 235 | 02a-TricapCubeA-Fe3C7P1 | -2041.2947939 | 18.88 |
| 236 | 03b-TricapCubeB-Fe2P1C9 | -2041.2947775 | 18.89 |
| 237 | 02a-TricapCubeA-Fe4C6P3 | -2041.2941725 | 19.27 |
| 238 | 02b-TricapCubeA-Fe4P1C8 | -2041.2941487 | 19.29 |
| 239 | 04a-Icos-1vx-Fe2C3P1    | -2041.2941480 | 19.29 |
| 240 | 04a-Icos-1vx-Fe3C4P2    | -2041.2941480 | 19.29 |
| 241 | 04a-Icos-1vx-Fe4C2P2    | -2041.2941480 | 19.29 |
| 242 | 04b-Icos-1vx-Fe5P1C9    | -2041.2941361 | 19.29 |
| 243 | 02a-TricapCubeA-Fe2C3P2 | -2041.2941275 | 19.30 |
| 244 | 02a-TricapCubeA-Fe2C1P3 | -2041.2941247 | 19.30 |
| 245 | 04a-Icos-1vx-Fe4C1P4    | -2041.2941239 | 19.30 |
| 246 | 04b-Icos-1vx-Fe3P5C5    | -2041.2941132 | 19.31 |
| 247 | 02a-TricapCubeA-Fe4C1P9 | -2041.2940852 | 19.33 |
| 248 | 04b-Icos-1vx-Fe2P2C1    | -2041.2940816 | 19.33 |
| 249 | 04b-Icos-1vx-Fe4P1C5    | -2041.2940494 | 19.35 |



|     |                              |               |       |
|-----|------------------------------|---------------|-------|
| 250 | 04b-Icos-1vx-Fe1P1C2         | -2041.2926432 | 20.23 |
| 251 | 01a-PentaCapTriPri-Fe2C4P5   | -2041.2926005 | 20.26 |
| 252 | 04a-Icos-1vx-Fe2C3P2         | -2041.2925917 | 20.26 |
| 253 | 03b-TricapCubeB-Fe4P3C1      | -2041.2925854 | 20.27 |
| 254 | 04a-Icos-1vx-Fe3C1P7         | -2041.2925662 | 20.28 |
| 255 | 03b-TricapCubeB-Fe3P1C7      | -2041.2913157 | 21.06 |
| 256 | 04a-Icos-1vx-Fe5C3P3         | -2041.2912962 | 21.08 |
| 257 | 04b-Icos-1vx-Fe3P2C8         | -2041.2911923 | 21.14 |
| 258 | 02a-TricapCubeA-Fe4C3P7      | -2041.2883419 | 22.93 |
| 259 | 04b-Icos-1vx-Fe3P1C8         | -2041.2883225 | 22.94 |
| 260 | 02b-TricapCubeA-Fe4P4C6      | -2041.2883014 | 22.96 |
| 261 | 03a-TricapCubeB-Fe4C3P3      | -2041.2882999 | 22.96 |
| 262 | 04a-Icos-1vx-Fe1C1P2         | -2041.2882981 | 22.96 |
| 263 | 04b-Icos-1vx-Fe2P5C1         | -2041.2882864 | 22.97 |
| 264 | 03b-TricapCubeB-Fe1P1C4      | -2041.2882823 | 22.97 |
| 265 | 04b-Icos-1vx-Fe2P3C2_r-34    | -2041.2882557 | 22.98 |
| 266 | 04b-Icos-1vx-Fe3P1C7         | -2041.2882279 | 23.00 |
| 267 | 04a-Icos-1vx-Fe3C6P2         | -2041.2882181 | 23.01 |
| 268 | 04b-Icos-1vx-Fe2P3C5_r-13    | -2041.2882001 | 23.02 |
| 269 | 04b-Icos-1vx-Fe2P3C2_i-34    | -2041.2875608 | 23.42 |
| 270 | 02a-TricapCubeA-Fe2C3P7      | -2041.2873151 | 23.57 |
| 271 | 04b-Icos-1vx-Fe3P5C4         | -2041.2873003 | 23.58 |
| 272 | 03a-TricapCubeB-Fe3C3P3      | -2041.2872754 | 23.60 |
| 273 | 01a-PentaCapTriPri-Fe1C3P2   | -2041.2872722 | 23.60 |
| 274 | 04a-Icos-1vx-Fe3C6P3         | -2041.2872494 | 23.62 |
| 275 | 04b-Icos-1vx-Fe2P1C6         | -2041.2872430 | 23.62 |
| 276 | 02b-TricapCubeA-Fe4P4C4      | -2041.2872429 | 23.62 |
| 277 | 04a-Icos-1vx-Fe5C1P4         | -2041.2872360 | 23.62 |
| 278 | 01b-PentaCapTriPri-Fe1P1C9   | -2041.2872276 | 23.63 |
| 279 | 02b-TricapCubeA-Fe3P6C2      | -2041.2872169 | 23.64 |
| 280 | 01b-PentaCapTriPri-Fe1P2C3   | -2041.2872080 | 23.64 |
| 281 | 03a-TricapCubeB-Fe1C1P6      | -2041.2872077 | 23.64 |
| 282 | 01a-PentaCapTriPri-Fe1C3P4   | -2041.2871929 | 23.65 |
| 283 | 02a-TricapCubeA-Fe2C1P9      | -2041.2871928 | 23.65 |
| 284 | 04a-Icos-1vx-Fe4C4P3         | -2041.2871813 | 23.66 |
| 285 | 01b-PentaCapTriPri-Fe1P1C3   | -2041.2868926 | 23.84 |
| 286 | 04a-Icos-1vx-Fe1C2P1         | -2041.2868792 | 23.85 |
| 287 | 02a-TricapCubeA-Fe1C2P1_r-15 | -2041.2868508 | 23.87 |
| 288 | 02b-TricapCubeA-Fe2P3C3      | -2041.2868126 | 23.89 |
| 289 | 02a-TricapCubeA-Fe3C5P4      | -2041.2866959 | 23.96 |
| 290 | 04b-Icos-1vx-Fe1P3C1         | -2041.2857950 | 24.53 |
| 291 | 02b-TricapCubeA-Fe3P7C1      | -2041.2857537 | 24.55 |

|     |                            |               |       |
|-----|----------------------------|---------------|-------|
| 292 | 04a-Icos-1vx-Fe3C5P2       | -2041.2857210 | 24.58 |
| 293 | 02a-TricapCubeA-Fe3C2P6    | -2041.2857035 | 24.59 |
| 294 | 04a-Icos-1vx-Fe1C3P1       | -2041.2856971 | 24.59 |
| 295 | 02a-TricapCubeA-Fe2C3P6    | -2041.2856960 | 24.59 |
| 296 | 04a-Icos-1vx-Fe2C2P2       | -2041.2856921 | 24.59 |
| 297 | 01b-PentaCapTriPri-Fe1P3C2 | -2041.2856910 | 24.59 |
| 298 | 03a-TricapCubeB-Fe3C2P6    | -2041.2856706 | 24.61 |
| 299 | 02b-TricapCubeA-Fe4P1C5    | -2041.2856677 | 24.61 |
| 300 | 04a-Icos-1vx-Fe3C3P2       | -2041.2856541 | 24.62 |
| 301 | 03a-TricapCubeB-Fe4C2P3    | -2041.2856440 | 24.62 |
| 302 | 02a-TricapCubeA-Fe4C7P1    | -2041.2856188 | 24.64 |
| 303 | 04a-Icos-1vx-Fe1C2P3       | -2041.2856117 | 24.64 |
| 304 | 01a-PentaCapTriPri-Fe1C1P9 | -2041.2856046 | 24.65 |
| 305 | 02a-TricapCubeA-Fe3C5P5    | -2041.2855992 | 24.65 |
| 306 | 03a-TricapCubeB-Fe1C2P2    | -2041.2855983 | 24.65 |
| 307 | 03b-TricapCubeB-Fe2P1C8    | -2041.2855977 | 24.65 |
| 308 | 04b-Icos-1vx-Fe4P3C1       | -2041.2855790 | 24.66 |
| 309 | 03b-TricapCubeB-Fe2P4C1    | -2041.2855761 | 24.67 |
| 310 | 04a-Icos-1vx-Fe4C1P8       | -2041.2855535 | 24.68 |
| 311 | 02a-TricapCubeA-Fe2C1P1    | -2041.2855441 | 24.69 |
| 312 | 04a-Icos-1vx-Fe4C3P5       | -2041.2855005 | 24.71 |
| 313 | 02a-TricapCubeA-Fe2C3P4    | -2041.2854951 | 24.72 |
| 314 | 02b-TricapCubeA-Fe4P3C7    | -2041.2854642 | 24.74 |
| 315 | 02b-TricapCubeA-Fe2P3C4    | -2041.2854239 | 24.76 |
| 316 | 03b-TricapCubeB-Fe3P2C7    | -2041.2854207 | 24.76 |
| 317 | 04a-Icos-1vx-Fe3C1P8       | -2041.2854037 | 24.77 |
| 318 | 04b-Icos-1vx-Fe2P1C7       | -2041.2853867 | 24.79 |
| 319 | 04a-Icos-1vx-Fe2C1P7       | -2041.2853859 | 24.79 |
| 320 | 02b-TricapCubeA-Fe2P1C4    | -2041.2853810 | 24.79 |
| 321 | 02b-TricapCubeA-Fe3P4C1    | -2041.2853611 | 24.80 |
| 322 | 04a-Icos-1vx-Fe1C3P6       | -2041.2851402 | 24.94 |
| 323 | 04b-Icos-1vx-Fe5P5C1       | -2041.2844958 | 25.34 |
| 324 | 03a-TricapCubeB-Fe1C1P4    | -2041.2844798 | 25.35 |
| 325 | 03a-TricapCubeB-Fe1C3P3    | -2041.2844391 | 25.38 |
| 326 | 02a-TricapCubeA-Fe3C6P1    | -2041.2844366 | 25.38 |
| 327 | 04b-Icos-1vx-Fe3P2C7       | -2041.2844262 | 25.39 |
| 328 | 04a-Icos-1vx-Fe1C4P2       | -2041.2844036 | 25.40 |
| 329 | 04a-Icos-1vx-Fe4C3P4       | -2041.2844028 | 25.40 |
| 330 | 04a-Icos-1vx-Fe1C3P3       | -2041.2842949 | 25.47 |
| 331 | 04a-Icos-1vx-Fe3C5P3       | -2041.2842905 | 25.47 |
| 332 | 04a-Icos-1vx-Fe2C2P7       | -2041.2842823 | 25.48 |
| 333 | 03b-TricapCubeB-Fe1P1C6    | -2041.2842317 | 25.51 |

|     |                            |               |       |
|-----|----------------------------|---------------|-------|
| 334 | 02b-TricapCubeA-Fe2P4C2    | -2041.2842253 | 25.51 |
| 335 | 04b-Icos-1vx-Fe2P3C3       | -2041.2842222 | 25.52 |
| 336 | 04b-Icos-1vx-Fe3P4C4       | -2041.2842211 | 25.52 |
| 337 | 04a-Icos-1vx-Fe2C3P7       | -2041.2842109 | 25.52 |
| 338 | 04b-Icos-1vx-Fe4P4C2       | -2041.2838553 | 25.75 |
| 339 | 04b-Icos-1vx-Fe4P1C9       | -2041.2838088 | 25.78 |
| 340 | 03a-TricapCubeB-Fe1C2P7    | -2041.2837548 | 25.81 |
| 341 | 04b-Icos-1vx-Fe4P2C6       | -2041.2837399 | 25.82 |
| 342 | 02a-TricapCubeA-Fe3C1P9    | -2041.2836650 | 25.87 |
| 343 | 04b-Icos-1vx-Fe4P1C7       | -2041.2831229 | 26.21 |
| 344 | 03a-TricapCubeB-Fe1C1P5    | -2041.2831033 | 26.22 |
| 345 | 04b-Icos-1vx-Fe3P5C2       | -2041.2830627 | 26.24 |
| 346 | 03b-TricapCubeB-Fe3P1C8    | -2041.2830311 | 26.26 |
| 347 | 02b-TricapCubeA-Fe3P1C6    | -2041.2830261 | 26.27 |
| 348 | 03b-TricapCubeB-Fe2P3C6    | -2041.2830203 | 26.27 |
| 349 | 03b-TricapCubeB-Fe1P1C5    | -2041.2830185 | 26.27 |
| 350 | 04a-Icos-1vx-Fe4C1P7       | -2041.2829929 | 26.29 |
| 351 | 01a-PentaCapTriPri-Fe2C5P1 | -2041.2829916 | 26.29 |
| 352 | 01b-PentaCapTriPri-Fe2P5C5 | -2041.2829914 | 26.29 |
| 353 | 01a-PentaCapTriPri-Fe2C4P4 | -2041.2829828 | 26.29 |
| 354 | 02a-TricapCubeA-Fe4C1P7    | -2041.2829816 | 26.29 |
| 355 | 01a-PentaCapTriPri-Fe2C4P2 | -2041.2829599 | 26.31 |
| 356 | 03a-TricapCubeB-Fe1C1P9    | -2041.2829569 | 26.31 |
| 357 | 02a-TricapCubeA-Fe3C8P2    | -2041.2829569 | 26.31 |
| 358 | 02b-TricapCubeA-Fe4P5C1    | -2041.2829403 | 26.32 |
| 359 | 03a-TricapCubeB-Fe1C2P6    | -2041.2828908 | 26.35 |
| 360 | 03a-TricapCubeB-Fe4C1P1    | -2041.2819970 | 26.91 |
| 361 | 04b-Icos-1vx-Fe4P2C2       | -2041.2818581 | 27.00 |
| 362 | 02a-TricapCubeA-Fe2C2P4    | -2041.2818260 | 27.02 |
| 363 | 04a-Icos-1vx-Fe4C1P5       | -2041.2817512 | 27.07 |
| 364 | 02b-TricapCubeA-Fe2P1C3    | -2041.2817325 | 27.08 |
| 365 | 02b-TricapCubeA-Fe2P3C2    | -2041.2817148 | 27.09 |
| 366 | 04a-Icos-1vx-Fe5C1P5       | -2041.2816177 | 27.15 |
| 367 | 04b-Icos-1vx-Fe3P2C4       | -2041.2815604 | 27.19 |
| 368 | 02b-TricapCubeA-Fe3P9C1    | -2041.2814549 | 27.25 |
| 369 | 04b-Icos-1vx-Fe1P2C1       | -2041.2814218 | 27.27 |
| 370 | 02a-TricapCubeA-Fe4C1P4    | -2041.2814180 | 27.28 |
| 371 | 03b-TricapCubeB-Fe4P1C4    | -2041.2813951 | 27.29 |
| 372 | 01a-PentaCapTriPri-Fe1C1P3 | -2041.2813631 | 27.31 |
| 373 | 03a-TricapCubeB-Fe3C3P2    | -2041.2807866 | 27.67 |
| 374 | 04a-Icos-1vx-Fe3C8P1       | -2041.2807439 | 27.70 |
| 375 | 03a-TricapCubeB-Fe3C3P7    | -2041.2807405 | 27.70 |

|     |                            |               |       |
|-----|----------------------------|---------------|-------|
| 376 | 02b-TricapCubeA-Fe1P3C2    | -2041.2807354 | 27.70 |
| 377 | 04b-Icos-1vx-Fe4P6C1       | -2041.2807246 | 27.71 |
| 378 | 04b-Icos-1vx-Fe5P4C1       | -2041.2807203 | 27.71 |
| 379 | 02a-TricapCubeA-Fe3C2P7    | -2041.2807120 | 27.72 |
| 380 | 03b-TricapCubeB-Fe3P3C7    | -2041.2807089 | 27.72 |
| 381 | 04a-Icos-1vx-Fe5C3P7       | -2041.2806985 | 27.73 |
| 382 | 02b-TricapCubeA-Fe3P2C7    | -2041.2806967 | 27.73 |
| 383 | 02b-TricapCubeA-Fe4P5C3    | -2041.2806941 | 27.73 |
| 384 | 03a-TricapCubeB-Fe4C5P2    | -2041.2806897 | 27.73 |
| 385 | 03b-TricapCubeB-Fe4P3C6    | -2041.2806838 | 27.74 |
| 386 | 03a-TricapCubeB-Fe4C2P8    | -2041.2806834 | 27.74 |
| 387 | 04a-Icos-1vx-Fe4C2P8       | -2041.2806768 | 27.74 |
| 388 | 02a-TricapCubeA-Fe4C5P4    | -2041.2806750 | 27.74 |
| 389 | 02b-TricapCubeA-Fe3P6C3    | -2041.2806745 | 27.74 |
| 390 | 04a-Icos-1vx-Fe3C4P4       | -2041.2806740 | 27.74 |
| 391 | 04a-Icos-1vx-Fe5C4P1       | -2041.2806727 | 27.74 |
| 392 | 02b-TricapCubeA-Fe4P2C8    | -2041.2806648 | 27.75 |
| 393 | 04a-Icos-1vx-Fe5C4P6       | -2041.2806646 | 27.75 |
| 394 | 04b-Icos-1vx-Fe3P3C7       | -2041.2806626 | 27.75 |
| 395 | 02a-TricapCubeA-Fe3C6P4    | -2041.2806610 | 27.75 |
| 396 | 03a-TricapCubeB-Fe3C1P9    | -2041.2805971 | 27.79 |
| 397 | 02a-TricapCubeA-Fe2C4P3    | -2041.2805789 | 27.80 |
| 398 | 03a-TricapCubeB-Fe4C3P6    | -2041.2803251 | 27.96 |
| 399 | 04b-Icos-1vx-Fe5P1C8       | -2041.2803121 | 27.97 |
| 400 | 04b-Icos-1vx-Fe3P3C3       | -2041.2802914 | 27.98 |
| 401 | 04a-Icos-1vx-Fe5C2P5       | -2041.2800741 | 28.12 |
| 402 | 04a-Icos-1vx-Fe5C1P7       | -2041.2799884 | 28.17 |
| 403 | 03b-TricapCubeB-Fe3P2C2    | -2041.2799508 | 28.20 |
| 404 | 03b-TricapCubeB-Fe1P2C3    | -2041.2795986 | 28.42 |
| 405 | 02a-TricapCubeA-Fe3C9P1    | -2041.2795858 | 28.43 |
| 406 | 02a-TricapCubeA-Fe4C3P6    | -2041.2792467 | 28.64 |
| 407 | 04a-Icos-1vx-Fe3C1P2       | -2041.2792302 | 28.65 |
| 408 | 04b-Icos-1vx-Fe5P2C2       | -2041.2791790 | 28.68 |
| 409 | 02b-TricapCubeA-Fe1P1C4    | -2041.2784549 | 29.13 |
| 410 | 04a-Icos-1vx-Fe3C1P3       | -2041.2784457 | 29.14 |
| 411 | 02a-TricapCubeA-Fe3C2P3    | -2041.2784297 | 29.15 |
| 412 | 04b-Icos-1vx-Fe5P2C1       | -2041.2784241 | 29.15 |
| 413 | 03b-TricapCubeB-Fe3P1C1    | -2041.2784039 | 29.17 |
| 414 | 04b-Icos-1vx-Fe4P2C1       | -2041.2783839 | 29.18 |
| 415 | 01b-PentaCapTriPri-Fe1P1C1 | -2041.2783822 | 29.18 |
| 416 | 04b-Icos-1vx-Fe3P7C3       | -2041.2783786 | 29.18 |
| 417 | 03a-TricapCubeB-Fe4C2P4    | -2041.2783748 | 29.19 |

|     |                            |               |       |
|-----|----------------------------|---------------|-------|
| 418 | 03b-TricapCubeB-Fe3P2C1    | -2041.2783691 | 29.19 |
| 419 | 02b-TricapCubeA-Fe1P1C3    | -2041.2783668 | 29.19 |
| 420 | 02b-TricapCubeA-Fe3P3C6    | -2041.2783595 | 29.19 |
| 421 | 02a-TricapCubeA-Fe4C1P8    | -2041.2783278 | 29.21 |
| 422 | 04b-Icos-1vx-Fe1P3C5       | -2041.2783087 | 29.23 |
| 423 | 04a-Icos-1vx-Fe3C2P5       | -2041.2782799 | 29.24 |
| 424 | 03b-TricapCubeB-Fe4P1C1    | -2041.2782782 | 29.25 |
| 425 | 04b-Icos-1vx-Fe4P4C1       | -2041.2782649 | 29.25 |
| 426 | 01b-PentaCapTriPri-Fe1P1C7 | -2041.2782533 | 29.26 |
| 427 | 03a-TricapCubeB-Fe1C1P2    | -2041.2782527 | 29.26 |
| 428 | 04a-Icos-1vx-Fe2C2P4       | -2041.2782501 | 29.26 |
| 429 | 03b-TricapCubeB-Fe1P1C3    | -2041.2782456 | 29.27 |
| 430 | 02b-TricapCubeA-Fe4P1C2    | -2041.2782453 | 29.27 |
| 431 | 04b-Icos-1vx-Fe4P1C1       | -2041.2782437 | 29.27 |
| 432 | 02a-TricapCubeA-Fe2C2P3    | -2041.2782388 | 29.27 |
| 433 | 02a-TricapCubeA-Fe4C9P1    | -2041.2782287 | 29.28 |
| 434 | 04b-Icos-1vx-Fe3P7C1       | -2041.2782202 | 29.28 |
| 435 | 01a-PentaCapTriPri-Fe1C1P7 | -2041.2782188 | 29.28 |
| 436 | 04a-Icos-1vx-Fe3C4P1       | -2041.2782130 | 29.29 |
| 437 | 02a-TricapCubeA-Fe4C1P2    | -2041.2782065 | 29.29 |
| 438 | 03b-TricapCubeB-Fe3P2C4    | -2041.2782053 | 29.29 |
| 439 | 04b-Icos-1vx-Fe3P2C5       | -2041.2781998 | 29.30 |
| 440 | 04b-Icos-1vx-Fe4P3C3       | -2041.2781967 | 29.30 |
| 441 | 02b-TricapCubeA-Fe3P4C6    | -2041.2781955 | 29.30 |
| 442 | 04a-Icos-1vx-Fe1C3P5       | -2041.2781905 | 29.30 |
| 443 | 01b-PentaCapTriPri-Fe2P3C3 | -2041.2781731 | 29.31 |
| 444 | 03b-TricapCubeB-Fe1P5C1    | -2041.2781655 | 29.32 |
| 445 | 04a-Icos-1vx-Fe4C3P3       | -2041.2781564 | 29.32 |
| 446 | 02b-TricapCubeA-Fe2P1C2    | -2041.2781169 | 29.35 |
| 447 | 04b-Icos-1vx-Fe2P2C6       | -2041.2780579 | 29.38 |
| 448 | 04b-Icos-1vx-Fe2P1C9       | -2041.2779827 | 29.43 |
| 449 | 04a-Icos-1vx-Fe1C1P4       | -2041.2775967 | 29.67 |
| 450 | 02b-TricapCubeA-Fe4P4C2    | -2041.2775794 | 29.68 |
| 451 | 03b-TricapCubeB-Fe4P2C4    | -2041.2775669 | 29.69 |
| 452 | 02a-TricapCubeA-Fe3C3P6    | -2041.2775663 | 29.69 |
| 453 | 02b-TricapCubeA-Fe4P3C4    | -2041.2775464 | 29.71 |
| 454 | 03b-TricapCubeB-Fe1P3C2    | -2041.2775439 | 29.71 |
| 455 | 03b-TricapCubeB-Fe4P1C3    | -2041.2775395 | 29.71 |
| 456 | 02a-TricapCubeA-Fe1C1P4    | -2041.2775362 | 29.71 |
| 457 | 02a-TricapCubeA-Fe2C3P3    | -2041.2775358 | 29.71 |
| 458 | 04b-Icos-1vx-Fe3P1C1       | -2041.2775294 | 29.72 |
| 459 | 04a-Icos-1vx-Fe2C1P1       | -2041.2775218 | 29.72 |

|     |                            |               |       |
|-----|----------------------------|---------------|-------|
| 460 | 01a-PentaCapTriPri-Fe2C3P6 | -2041.2775212 | 29.72 |
| 461 | 04b-Icos-1vx-Fe3P1C3       | -2041.2775010 | 29.73 |
| 462 | 02a-TricapCubeA-Fe3C3P1    | -2041.2774976 | 29.74 |
| 463 | 03b-TricapCubeB-Fe3P1C3    | -2041.2774951 | 29.74 |
| 464 | 02b-TricapCubeA-Fe4P1C3    | -2041.2774907 | 29.74 |
| 465 | 03b-TricapCubeB-Fe3P2C6    | -2041.2764700 | 30.38 |
| 466 | 04a-Icos-1vx-Fe2C3P5       | -2041.2764551 | 30.39 |
| 467 | 04a-Icos-1vx-Fe2C1P8       | -2041.2763308 | 30.47 |
| 468 | 03b-TricapCubeB-Fe3P4C3    | -2041.2758646 | 30.76 |
| 469 | 04b-Icos-1vx-Fe2P4C2_r-21  | -2041.2757223 | 30.85 |
| 470 | 01a-PentaCapTriPri-Fe2C3P4 | -2041.2755868 | 30.93 |
| 471 | 04b-Icos-1vx-Fe2P4C2_i-21  | -2041.2755767 | 30.94 |
| 472 | 02a-TricapCubeA-Fe3C1P8    | -2041.2755735 | 30.94 |
| 473 | 01a-PentaCapTriPri-Fe2C5P3 | -2041.2754678 | 31.01 |
| 474 | 02a-TricapCubeA-Fe4C3P3    | -2041.2754464 | 31.02 |
| 475 | 04b-Icos-1vx-Fe5P3C4       | -2041.2749800 | 31.32 |
| 476 | 04b-Icos-1vx-Fe2P1C4       | -2041.2740875 | 31.88 |
| 477 | 02a-TricapCubeA-Fe2C1P2    | -2041.2740072 | 31.93 |
| 478 | 04a-Icos-1vx-Fe4C4P2       | -2041.2739916 | 31.94 |
| 479 | 02b-TricapCubeA-Fe3P8C2    | -2041.2739480 | 31.96 |
| 480 | 02b-TricapCubeA-Fe3P7C2    | -2041.2735397 | 32.22 |
| 481 | 01a-PentaCapTriPri-Fe1C1P2 | -2041.2734652 | 32.27 |
| 482 | 02a-TricapCubeA-Fe4C6P1    | -2041.2734401 | 32.28 |
| 483 | 04a-Icos-1vx-Fe2C5P1       | -2041.2730711 | 32.51 |
| 484 | 04a-Icos-1vx-Fe2C1P6       | -2041.2730571 | 32.52 |
| 485 | 03a-TricapCubeB-Fe4C6P1    | -2041.2730109 | 32.55 |
| 486 | 02b-TricapCubeA-Fe2P1C9    | -2041.2729965 | 32.56 |
| 487 | 04b-Icos-1vx-Fe2P4C3       | -2041.2729834 | 32.57 |
| 488 | 02b-TricapCubeA-Fe3P5C3    | -2041.2726888 | 32.75 |
| 489 | 02b-TricapCubeA-Fe4P7C2    | -2041.2726797 | 32.76 |
| 490 | 01a-PentaCapTriPri-Fe2C2P2 | -2041.2726586 | 32.77 |
| 491 | 01a-PentaCapTriPri-Fe2C4P1 | -2041.2719706 | 33.20 |
| 492 | 01b-PentaCapTriPri-Fe2P4C1 | -2041.2719651 | 33.21 |
| 493 | 02a-TricapCubeA-Fe3C1P5    | -2041.2707683 | 33.96 |
| 494 | 03a-TricapCubeB-Fe2C1P3    | -2041.2707655 | 33.96 |
| 495 | 02a-TricapCubeA-Fe2C1P6    | -2041.2707544 | 33.97 |
| 496 | 02b-TricapCubeA-Fe3P4C2    | -2041.2707526 | 33.97 |
| 497 | 04a-Icos-1vx-Fe4C1P3       | -2041.2707073 | 34.00 |
| 498 | 03a-TricapCubeB-Fe1C3P2    | -2041.2707047 | 34.00 |
| 499 | 03b-TricapCubeB-Fe2P1C2    | -2041.2706955 | 34.00 |
| 500 | 04a-Icos-1vx-Fe4C1P2       | -2041.2706933 | 34.01 |
| 501 | 03b-TricapCubeB-Fe2P1C3    | -2041.2706900 | 34.01 |

|     |                            |               |       |
|-----|----------------------------|---------------|-------|
| 502 | 03a-TricapCubeB-Fe2C3P2    | -2041.2706847 | 34.01 |
| 503 | 03a-TricapCubeB-Fe2C1P2    | -2041.2706777 | 34.02 |
| 504 | 04b-Icos-1vx-Fe4P1C3       | -2041.2706647 | 34.02 |
| 505 | 04b-Icos-1vx-Fe1P4C1       | -2041.2705516 | 34.09 |
| 506 | 01b-PentaCapTriPri-Fe2P4C4 | -2041.2705148 | 34.12 |
| 507 | 03b-TricapCubeB-Fe2P1C7    | -2041.2701746 | 34.33 |
| 508 | 02a-TricapCubeA-Fe4C4P2    | -2041.2701525 | 34.34 |
| 509 | 03a-TricapCubeB-Fe4C1P3    | -2041.2701046 | 34.37 |
| 510 | 04a-Icos-1vx-Fe3C1P1       | -2041.2700522 | 34.41 |
| 511 | 02b-TricapCubeA-Fe1P2C4    | -2041.2698928 | 34.51 |
| 512 | 03a-TricapCubeB-Fe4C1P9    | -2041.2698658 | 34.52 |
| 513 | 02a-TricapCubeA-Fe1C2P4    | -2041.2698651 | 34.53 |
| 514 | 04b-Icos-1vx-Fe5P3C5       | -2041.2698521 | 34.53 |
| 515 | 03a-TricapCubeB-Fe3C4P3    | -2041.2698197 | 34.55 |
| 516 | 02a-TricapCubeA-Fe1C3P6    | -2041.2698141 | 34.56 |
| 517 | 02a-TricapCubeA-Fe1C1P6    | -2041.2698055 | 34.56 |
| 518 | 04a-Icos-1vx-Fe5C2P8       | -2041.2697688 | 34.59 |
| 519 | 04b-Icos-1vx-Fe3P1C9       | -2041.2697652 | 34.59 |
| 520 | 03a-TricapCubeB-Fe3C5P2    | -2041.2696783 | 34.64 |
| 521 | 04a-Icos-1vx-Fe1C3P4       | -2041.2696655 | 34.65 |
| 522 | 03a-TricapCubeB-Fe4C3P7    | -2041.2696641 | 34.65 |
| 523 | 03b-TricapCubeB-Fe3P3C5    | -2041.2696572 | 34.66 |
| 524 | 02b-TricapCubeA-Fe2P2C1    | -2041.2696407 | 34.67 |
| 525 | 02a-TricapCubeA-Fe2C2P1    | -2041.2696354 | 34.67 |
| 526 | 03b-TricapCubeB-Fe4P3C7    | -2041.2696269 | 34.67 |
| 527 | 04b-Icos-1vx-Fe5P3C7       | -2041.2696233 | 34.68 |
| 528 | 04a-Icos-1vx-Fe4C5P1       | -2041.2696110 | 34.68 |
| 529 | 02a-TricapCubeA-Fe1C3P2    | -2041.2695978 | 34.69 |
| 530 | 02b-TricapCubeA-Fe4P5C4    | -2041.2695965 | 34.69 |
| 531 | 03b-TricapCubeB-Fe4P5C2    | -2041.2695931 | 34.70 |
| 532 | 04a-Icos-1vx-Fe3C3P7       | -2041.2695921 | 34.70 |
| 533 | 01b-PentaCapTriPri-Fe1P4C1 | -2041.2695906 | 34.70 |
| 534 | 02b-TricapCubeA-Fe4P5C5    | -2041.2695905 | 34.70 |
| 535 | 04b-Icos-1vx-Fe5P4C6       | -2041.2695900 | 34.70 |
| 536 | 04b-Icos-1vx-Fe3P3C6       | -2041.2695837 | 34.70 |
| 537 | 01b-PentaCapTriPri-Fe1P1C5 | -2041.2695678 | 34.71 |
| 538 | 04b-Icos-1vx-Fe4P2C8       | -2041.2695406 | 34.73 |
| 539 | 04a-Icos-1vx-Fe3C5P1       | -2041.2693657 | 34.84 |
| 540 | 03b-TricapCubeB-Fe1P1C1    | -2041.2693418 | 34.85 |
| 541 | 04b-Icos-1vx-Fe5P1C6       | -2041.2693232 | 34.87 |
| 542 | 04a-Icos-1vx-Fe5C1P6       | -2041.2692800 | 34.89 |
| 543 | 04a-Icos-1vx-Fe4C1P9       | -2041.2691166 | 34.99 |

|     |                              |               |       |
|-----|------------------------------|---------------|-------|
| 544 | 02b-TricapCubeA-Fe2P3C5      | -2041.2690994 | 35.01 |
| 545 | 01b-PentaCapTriPri-Fe2P4C2   | -2041.2690721 | 35.02 |
| 546 | 04a-Icos-1vx-Fe4C2P6         | -2041.2690368 | 35.04 |
| 547 | 02a-TricapCubeA-Fe3C1P3      | -2041.2686955 | 35.26 |
| 548 | 03b-TricapCubeB-Fe3P4C1      | -2041.2685816 | 35.33 |
| 549 | 02a-TricapCubeA-Fe4C4P5      | -2041.2685680 | 35.34 |
| 550 | 02a-TricapCubeA-Fe4C2P1      | -2041.2685323 | 35.36 |
| 551 | 02a-TricapCubeA-Fe3C5P2      | -2041.2685231 | 35.37 |
| 552 | 04b-Icos-1vx-Fe1P1C1         | -2041.2684741 | 35.40 |
| 553 | 03a-TricapCubeB-Fe3C2P8      | -2041.2679231 | 35.74 |
| 554 | 03b-TricapCubeB-Fe1P2C7      | -2041.2679202 | 35.75 |
| 555 | 03a-TricapCubeB-Fe4C3P5      | -2041.2678999 | 35.76 |
| 556 | 01a-PentaCapTriPri-Fe1C1P5   | -2041.2678898 | 35.76 |
| 557 | 04a-Icos-1vx-Fe1C1P1         | -2041.2678479 | 35.79 |
| 558 | 03b-TricapCubeB-Fe4P4C1_r-16 | -2041.2678469 | 35.79 |
| 559 | 04b-Icos-1vx-Fe5P1C2         | -2041.2677996 | 35.82 |
| 560 | 04a-Icos-1vx-Fe3C6P4         | -2041.2677910 | 35.83 |
| 561 | 02a-TricapCubeA-Fe2C3P5      | -2041.2675305 | 35.99 |
| 562 | 02b-TricapCubeA-Fe3P4C4      | -2041.2674558 | 36.04 |
| 563 | 01b-PentaCapTriPri-Fe2P1C5   | -2041.2673882 | 36.08 |
| 564 | 03a-TricapCubeB-Fe1C2P3      | -2041.2673303 | 36.12 |
| 565 | 04a-Icos-1vx-Fe4C3P2         | -2041.2669041 | 36.38 |
| 566 | 04b-Icos-1vx-Fe5P3C3         | -2041.2668851 | 36.40 |
| 567 | 04a-Icos-1vx-Fe3C2P8         | -2041.2668051 | 36.45 |
| 568 | 04b-Icos-1vx-Fe3P6C2         | -2041.2667027 | 36.51 |
| 569 | 04a-Icos-1vx-Fe5C1P3         | -2041.2666909 | 36.52 |
| 570 | 02b-TricapCubeA-Fe1P1C7      | -2041.2666493 | 36.54 |
| 571 | 02b-TricapCubeA-Fe1P1C2      | -2041.2666441 | 36.55 |
| 572 | 02b-TricapCubeA-Fe1P3C5      | -2041.2666418 | 36.55 |
| 573 | 02b-TricapCubeA-Fe3P4C3      | -2041.2665834 | 36.58 |
| 574 | 03a-TricapCubeB-Fe3C1P2      | -2041.2663810 | 36.71 |
| 575 | 03b-TricapCubeB-Fe4P2C1      | -2041.2663513 | 36.73 |
| 576 | 02b-TricapCubeA-Fe3P3C1      | -2041.2662659 | 36.78 |
| 577 | 02b-TricapCubeA-Fe2P1C8      | -2041.2657657 | 37.10 |
| 578 | 04b-Icos-1vx-Fe2P1C1         | -2041.2657616 | 37.10 |
| 579 | 04a-Icos-1vx-Fe2C6P1         | -2041.2657488 | 37.11 |
| 580 | 02b-TricapCubeA-Fe4P3C2      | -2041.2657324 | 37.12 |
| 581 | 04b-Icos-1vx-Fe2P3C1         | -2041.2657183 | 37.13 |
| 582 | 02a-TricapCubeA-Fe4C2P4      | -2041.2651002 | 37.52 |
| 583 | 01b-PentaCapTriPri-Fe2P5C1   | -2041.2650776 | 37.53 |
| 584 | 04b-Icos-1vx-Fe3P5C1         | -2041.2645946 | 37.83 |
| 585 | 02a-TricapCubeA-Fe3C5P3      | -2041.2643648 | 37.98 |



|     |                              |               |       |
|-----|------------------------------|---------------|-------|
| 586 | 04a-Icos-1vx-Fe2C1P2         | -2041.2642931 | 38.02 |
| 587 | 04a-Icos-1vx-Fe5C5P1         | -2041.2640205 | 38.19 |
| 588 | 02b-TricapCubeA-Fe3P6C1      | -2041.2639770 | 38.22 |
| 589 | 04a-Icos-1vx-Fe3C2P7         | -2041.2639640 | 38.23 |
| 590 | 03b-TricapCubeB-Fe1P3C4      | -2041.2639533 | 38.23 |
| 591 | 03b-TricapCubeB-Fe4P4C1_i-16 | -2041.2631771 | 38.72 |
| 592 | 03a-TricapCubeB-Fe3C4P1      | -2041.2630320 | 38.81 |
| 593 | 03b-TricapCubeB-Fe4P1C6      | -2041.2626977 | 39.02 |
| 594 | 04b-Icos-1vx-Fe2P2C5         | -2041.2626627 | 39.04 |
| 595 | 03b-TricapCubeB-Fe3P5C2      | -2041.2626570 | 39.05 |
| 596 | 02b-TricapCubeA-Fe4P8C2      | -2041.2626536 | 39.05 |
| 597 | 01a-PentaCapTriPri-Fe1C2P2   | -2041.2626472 | 39.05 |
| 598 | 02b-TricapCubeA-Fe2P5C1      | -2041.2626409 | 39.06 |
| 599 | 02b-TricapCubeA-Fe3P5C1      | -2041.2625748 | 39.10 |
| 600 | 04a-Icos-1vx-Fe2C4P2         | -2041.2624783 | 39.16 |
| 601 | 04a-Icos-1vx-Fe2C1P9         | -2041.2624622 | 39.17 |
| 602 | 04a-Icos-1vx-Fe2C2P6         | -2041.2624151 | 39.20 |
| 603 | 03b-TricapCubeB-Fe2P3C4      | -2041.2620605 | 39.42 |
| 604 | 04b-Icos-1vx-Fe5P3C2         | -2041.2613435 | 39.87 |
| 605 | 03a-TricapCubeB-Fe4C3P2      | -2041.2613171 | 39.89 |
| 606 | 04b-Icos-1vx-Fe2P3C4         | -2041.2612844 | 39.91 |
| 607 | 02a-TricapCubeA-Fe3C2P2      | -2041.2612711 | 39.92 |
| 608 | 04a-Icos-1vx-Fe5C3P2         | -2041.2612612 | 39.92 |
| 609 | 02a-TricapCubeA-Fe2C2P6      | -2041.2612603 | 39.92 |
| 610 | 04a-Icos-1vx-Fe3C9P1         | -2041.2612602 | 39.92 |
| 611 | 02b-TricapCubeA-Fe1P3C3      | -2041.2612548 | 39.93 |
| 612 | 04b-Icos-1vx-Fe5P4C5         | -2041.2612497 | 39.93 |
| 613 | 03b-TricapCubeB-Fe3P3C4      | -2041.2612289 | 39.94 |
| 614 | 04a-Icos-1vx-Fe3C4P5         | -2041.2612288 | 39.94 |
| 615 | 04a-Icos-1vx-Fe5C4P5         | -2041.2612176 | 39.95 |
| 616 | 02b-TricapCubeA-Fe4P2C6      | -2041.2612167 | 39.95 |
| 617 | 04b-Icos-1vx-Fe4P2C5         | -2041.2612053 | 39.96 |
| 618 | 01b-PentaCapTriPri-Fe1P3C1   | -2041.2612038 | 39.96 |
| 619 | 04b-Icos-1vx-Fe3P3C5         | -2041.2611868 | 39.97 |
| 620 | 03a-TricapCubeB-Fe3C2P5      | -2041.2609370 | 40.13 |
| 621 | 02a-TricapCubeA-Fe1C1P8      | -2041.2609261 | 40.13 |
| 622 | 04a-Icos-1vx-Fe5C2P7         | -2041.2609184 | 40.14 |
| 623 | 04a-Icos-1vx-Fe5C4P4         | -2041.2609079 | 40.15 |
| 624 | 04a-Icos-1vx-Fe3C3P4         | -2041.2608990 | 40.15 |
| 625 | 02a-TricapCubeA-Fe1C3P7      | -2041.2608937 | 40.15 |
| 626 | 03a-TricapCubeB-Fe3C3P1      | -2041.2608891 | 40.16 |
| 627 | 03a-TricapCubeB-Fe3C2P7      | -2041.2606731 | 40.29 |

|     |                            |               |       |
|-----|----------------------------|---------------|-------|
| 628 | 01b-PentaCapTriPri-Fe2P4C5 | -2041.2605735 | 40.36 |
| 629 | 02a-TricapCubeA-Fe4C6P2    | -2041.2604489 | 40.43 |
| 630 | 03b-TricapCubeB-Fe3P6C1    | -2041.2604478 | 40.43 |
| 631 | 03a-TricapCubeB-Fe4C4P1    | -2041.2604412 | 40.44 |
| 632 | 04b-Icos-1vx-Fe3P6C4       | -2041.2604372 | 40.44 |
| 633 | 04a-Icos-1vx-Fe5C4P2       | -2041.2604276 | 40.45 |
| 634 | 03a-TricapCubeB-Fe1C2P1    | -2041.2603974 | 40.47 |
| 635 | 04a-Icos-1vx-Fe5C1P2       | -2041.2603958 | 40.47 |
| 636 | 02b-TricapCubeA-Fe4P6C1    | -2041.2603663 | 40.49 |
| 637 | 02b-TricapCubeA-Fe2P2C4    | -2041.2602769 | 40.54 |
| 638 | 04a-Icos-1vx-Fe4C2P7       | -2041.2602285 | 40.57 |
| 639 | 04b-Icos-1vx-Fe3P2C2       | -2041.2602226 | 40.58 |
| 640 | 04b-Icos-1vx-Fe1P4C2       | -2041.2602218 | 40.58 |
| 641 | 04b-Icos-1vx-Fe1P3C3       | -2041.2601765 | 40.60 |
| 642 | 04a-Icos-1vx-Fe4C3P7       | -2041.2601657 | 40.61 |
| 643 | 02a-TricapCubeA-Fe4C2P8    | -2041.2601521 | 40.62 |
| 644 | 04b-Icos-1vx-Fe3P5C3       | -2041.2601152 | 40.64 |
| 645 | 03a-TricapCubeB-Fe1C4P2    | -2041.2601132 | 40.64 |
| 646 | 03a-TricapCubeB-Fe3C3P6    | -2041.2595659 | 40.99 |
| 647 | 04b-Icos-1vx-Fe1P3C6       | -2041.2595556 | 40.99 |
| 648 | 04b-Icos-1vx-Fe5P4C3       | -2041.2595357 | 41.01 |
| 649 | 04a-Icos-1vx-Fe5C1P8       | -2041.2595114 | 41.02 |
| 650 | 03a-TricapCubeB-Fe1C5P2    | -2041.2592508 | 41.19 |
| 651 | 04b-Icos-1vx-Fe4P1C6       | -2041.2592267 | 41.20 |
| 652 | 04a-Icos-1vx-Fe2C4P3       | -2041.2591418 | 41.25 |
| 653 | 04a-Icos-1vx-Fe3C7P2       | -2041.2591348 | 41.26 |
| 654 | 03b-TricapCubeB-Fe3P2C3    | -2041.2591255 | 41.26 |
| 655 | 02a-TricapCubeA-Fe1C1P2    | -2041.2591113 | 41.27 |
| 656 | 02a-TricapCubeA-Fe1C1P7    | -2041.2590982 | 41.28 |
| 657 | 02a-TricapCubeA-Fe1C3P5    | -2041.2590892 | 41.29 |
| 658 | 04a-Icos-1vx-Fe5C2P3       | -2041.2590846 | 41.29 |
| 659 | 02b-TricapCubeA-Fe4P1C7    | -2041.2590180 | 41.33 |
| 660 | 03b-TricapCubeB-Fe1P3C3    | -2041.2589066 | 41.40 |
| 661 | 03a-TricapCubeB-Fe1C2P8    | -2041.2587871 | 41.48 |
| 662 | 03a-TricapCubeB-Fe2C1P4    | -2041.2587751 | 41.48 |
| 663 | 04b-Icos-1vx-Fe4P3C6       | -2041.2587634 | 41.49 |
| 664 | 04a-Icos-1vx-Fe4C3P6       | -2041.2587548 | 41.50 |
| 665 | 01a-PentaCapTriPri-Fe1C4P1 | -2041.2587440 | 41.50 |
| 666 | 03a-TricapCubeB-Fe1C3P6    | -2041.2587408 | 41.51 |
| 667 | 02a-TricapCubeA-Fe3C2P8    | -2041.2580884 | 41.92 |
| 668 | 01a-PentaCapTriPri-Fe2C3P1 | -2041.2580670 | 41.93 |
| 669 | 02a-TricapCubeA-Fe1C3P3    | -2041.2579004 | 42.03 |

|     |                              |               |       |
|-----|------------------------------|---------------|-------|
| 670 | 04a-Icos-1vx-Fe2C1P3         | -2041.2577354 | 42.14 |
| 671 | 03a-TricapCubeB-Fe2C5P1      | -2041.2575921 | 42.23 |
| 672 | 03a-TricapCubeB-Fe2C1P1      | -2041.2575395 | 42.26 |
| 673 | 04a-Icos-1vx-Fe2C2P5_r-27    | -2041.2575215 | 42.27 |
| 674 | 03a-TricapCubeB-Fe1C4P3      | -2041.2574665 | 42.31 |
| 675 | 02b-TricapCubeA-Fe4P6C4      | -2041.2574328 | 42.33 |
| 676 | 04b-Icos-1vx-Fe2P5C2         | -2041.2574251 | 42.33 |
| 677 | 01b-PentaCapTriPri-Fe2P2C4   | -2041.2570491 | 42.57 |
| 678 | 02b-TricapCubeA-Fe4P5C2      | -2041.2570234 | 42.58 |
| 679 | 02a-TricapCubeA-Fe4C5P2_i-12 | -2041.2570158 | 42.59 |
| 680 | 02b-TricapCubeA-Fe4P9C1      | -2041.2570130 | 42.59 |
| 681 | 02a-TricapCubeA-Fe4C5P2_r-12 | -2041.2569691 | 42.62 |
| 682 | 04a-Icos-1vx-Fe2C2P5_i-27    | -2041.2569515 | 42.63 |
| 683 | 03a-TricapCubeB-Fe3C1P4      | -2041.2568569 | 42.69 |
| 684 | 02a-TricapCubeA-Fe1C2P1_i-15 | -2041.2567639 | 42.75 |
| 685 | 02b-TricapCubeA-Fe3P2C4      | -2041.2566633 | 42.81 |
| 686 | 02b-TricapCubeA-Fe2P2C3      | -2041.2566372 | 42.83 |
| 687 | 04b-Icos-1vx-Fe3P3C4         | -2041.2565564 | 42.88 |
| 688 | 04a-Icos-1vx-Fe2C3P4         | -2041.2563307 | 43.02 |
| 689 | 03b-TricapCubeB-Fe3P3C2      | -2041.2562965 | 43.04 |
| 690 | 04b-Icos-1vx-Fe3P4C5         | -2041.2562807 | 43.05 |
| 691 | 02a-TricapCubeA-Fe4C2P6      | -2041.2562663 | 43.06 |
| 692 | 04b-Icos-1vx-Fe3P8C1         | -2041.2562654 | 43.06 |
| 693 | 03b-TricapCubeB-Fe4P3C2      | -2041.2562642 | 43.06 |
| 694 | 04b-Icos-1vx-Fe3P9C1         | -2041.2562591 | 43.06 |
| 695 | 04a-Icos-1vx-Fe4C2P5         | -2041.2562521 | 43.07 |
| 696 | 02b-TricapCubeA-Fe3P2C2      | -2041.2562252 | 43.08 |
| 697 | 04a-Icos-1vx-Fe4C5P2         | -2041.2562073 | 43.10 |
| 698 | 03a-TricapCubeB-Fe3C3P4      | -2041.2561911 | 43.11 |
| 699 | 02b-TricapCubeA-Fe4P4C5      | -2041.2545419 | 44.14 |
| 700 | 03b-TricapCubeB-Fe2P5C1      | -2041.2545236 | 44.15 |
| 701 | 04a-Icos-1vx-Fe4C1P1         | -2041.2545062 | 44.16 |
| 702 | 02a-TricapCubeA-Fe3C1P1      | -2041.2544809 | 44.18 |
| 703 | 04a-Icos-1vx-Fe4C4P1         | -2041.2544676 | 44.19 |
| 704 | 03a-TricapCubeB-Fe2C2P1      | -2041.2543819 | 44.24 |
| 705 | 02b-TricapCubeA-Fe4P3C3      | -2041.2540694 | 44.44 |
| 706 | 01b-PentaCapTriPri-Fe2P3C4   | -2041.2539825 | 44.49 |
| 707 | 01b-PentaCapTriPri-Fe2P5C3   | -2041.2538231 | 44.59 |
| 708 | 03a-TricapCubeB-Fe1C1P1      | -2041.2534972 | 44.80 |
| 709 | 02b-TricapCubeA-Fe3P1C5      | -2041.2534646 | 44.82 |
| 710 | 02b-TricapCubeA-Fe3P3C7      | -2041.2531022 | 45.04 |
| 711 | 02b-TricapCubeA-Fe3P1C1      | -2041.2529696 | 45.13 |

|     |                              |               |       |
|-----|------------------------------|---------------|-------|
| 712 | 01b-PentaCapTriPri-Fe2P1C2   | -2041.2528452 | 45.21 |
| 713 | 04a-Icos-1vx-Fe3C3P6         | -2041.2527649 | 45.26 |
| 714 | 03b-TricapCubeB-Fe2P2C3      | -2041.2527635 | 45.26 |
| 715 | 04a-Icos-1vx-Fe1C2P2         | -2041.2527634 | 45.26 |
| 716 | 03b-TricapCubeB-Fe2P1C5      | -2041.2527388 | 45.27 |
| 717 | 03b-TricapCubeB-Fe2P2C6      | -2041.2527041 | 45.29 |
| 718 | 03a-TricapCubeB-Fe2C3P3      | -2041.2524321 | 45.46 |
| 719 | 01b-PentaCapTriPri-Fe1P3C4   | -2041.2524182 | 45.47 |
| 720 | 02b-TricapCubeA-Fe4P2C4      | -2041.2517565 | 45.89 |
| 721 | 02a-TricapCubeA-Fe2C1P8      | -2041.2513696 | 46.13 |
| 722 | 04b-Icos-1vx-Fe2P6C1         | -2041.2512716 | 46.19 |
| 723 | 02a-TricapCubeA-Fe4C1P3      | -2041.2510972 | 46.30 |
| 724 | 04b-Icos-1vx-Fe1P1C4         | -2041.2510065 | 46.36 |
| 725 | 03b-TricapCubeB-Fe1P2C6      | -2041.2509267 | 46.41 |
| 726 | 02a-TricapCubeA-Fe4C5P1      | -2041.2508794 | 46.44 |
| 727 | 03b-TricapCubeB-Fe4P2C2      | -2041.2508528 | 46.46 |
| 728 | 02a-TricapCubeA-Fe3C1P6      | -2041.2508441 | 46.46 |
| 729 | 03b-TricapCubeB-Fe1P1C9      | -2041.2508225 | 46.47 |
| 730 | 01a-PentaCapTriPri-Fe1C1P4   | -2041.2507904 | 46.49 |
| 731 | 03b-TricapCubeB-Fe2P5C2      | -2041.2505417 | 46.65 |
| 732 | 03b-TricapCubeB-Fe2P1C6      | -2041.2505036 | 46.67 |
| 733 | 04b-Icos-1vx-Fe3P1C2         | -2041.2503957 | 46.74 |
| 734 | 02b-TricapCubeA-Fe4P2C1      | -2041.2503951 | 46.74 |
| 735 | 03b-TricapCubeB-Fe2P2C2      | -2041.2501562 | 46.89 |
| 736 | 03b-TricapCubeB-Fe2P3C3      | -2041.2501113 | 46.92 |
| 737 | 02a-TricapCubeA-Fe4C3P4      | -2041.2500730 | 46.95 |
| 738 | 03b-TricapCubeB-Fe2P2C1      | -2041.2500534 | 46.96 |
| 739 | 01b-PentaCapTriPri-Fe1P1C2   | -2041.2497922 | 47.12 |
| 740 | 04a-Icos-1vx-Fe1C4P1         | -2041.2496271 | 47.22 |
| 741 | 02a-TricapCubeA-Fe3C4P5      | -2041.2487901 | 47.75 |
| 742 | 01b-PentaCapTriPri-Fe2P4C3   | -2041.2487685 | 47.76 |
| 743 | 03b-TricapCubeB-Fe1P3C7      | -2041.2480928 | 48.19 |
| 744 | 01b-PentaCapTriPri-Fe2P2C2   | -2041.2480172 | 48.24 |
| 745 | 03b-TricapCubeB-Fe1P2C2      | -2041.2474869 | 48.57 |
| 746 | 02b-TricapCubeA-Fe3P2C1      | -2041.2474688 | 48.58 |
| 747 | 03b-TricapCubeB-Fe1P1C2_r-39 | -2041.2470492 | 48.84 |
| 748 | 03a-TricapCubeB-Fe2C4P2      | -2041.2469624 | 48.90 |
| 749 | 03a-TricapCubeB-Fe2C3P7      | -2041.2469165 | 48.93 |
| 750 | 03b-TricapCubeB-Fe1P2C1      | -2041.2469165 | 48.93 |
| 751 | 03a-TricapCubeB-Fe2C2P7      | -2041.2468837 | 48.95 |
| 752 | 01a-PentaCapTriPri-Fe2C5P5   | -2041.2468557 | 48.96 |
| 753 | 01b-PentaCapTriPri-Fe2P1C1   | -2041.2467787 | 49.01 |

|     |                              |               |       |
|-----|------------------------------|---------------|-------|
| 754 | 01a-PentaCapTriPri-Fe2C3P7   | -2041.2466694 | 49.08 |
| 755 | 04b-Icos-1vx-Fe4P5C1         | -2041.2466576 | 49.09 |
| 756 | 04b-Icos-1vx-Fe1P2C4         | -2041.2464355 | 49.23 |
| 757 | 03a-TricapCubeB-Fe4C3P1      | -2041.2461668 | 49.40 |
| 758 | 04a-Icos-1vx-Fe1C2P4         | -2041.2460915 | 49.44 |
| 759 | 03a-TricapCubeB-Fe4C1P6      | -2041.2460600 | 49.46 |
| 760 | 04b-Icos-1vx-Fe1P4C3         | -2041.2460091 | 49.50 |
| 761 | 04a-Icos-1vx-Fe1C4P3         | -2041.2460083 | 49.50 |
| 762 | 03a-TricapCubeB-Fe2C1P7      | -2041.2460030 | 49.50 |
| 763 | 03b-TricapCubeB-Fe2P1C4      | -2041.2459785 | 49.51 |
| 764 | 04b-Icos-1vx-Fe5P1C3         | -2041.2459717 | 49.52 |
| 765 | 03a-TricapCubeB-Fe2C2P2      | -2041.2459613 | 49.53 |
| 766 | 02a-TricapCubeA-Fe3C4P3      | -2041.2455367 | 49.79 |
| 767 | 02b-TricapCubeA-Fe3P1C7_i-43 | -2041.2455194 | 49.80 |
| 768 | 01a-PentaCapTriPri-Fe2C3P5   | -2041.2451650 | 50.03 |
| 769 | 03a-TricapCubeB-Fe3C1P3      | -2041.2450060 | 50.12 |
| 770 | 03a-TricapCubeB-Fe1C1P3      | -2041.2448003 | 50.25 |
| 771 | 04b-Icos-1vx-Fe3P4C1         | -2041.2447421 | 50.29 |
| 772 | 01a-PentaCapTriPri-Fe2C1P1   | -2041.2446727 | 50.33 |
| 773 | 04b-Icos-1vx-Fe2P1C5         | -2041.2445600 | 50.40 |
| 774 | 02b-TricapCubeA-Fe4P3C6      | -2041.2440440 | 50.73 |
| 775 | 02a-TricapCubeA-Fe2C1P7      | -2041.2440279 | 50.74 |
| 776 | 04a-Icos-1vx-Fe3C2P1         | -2041.2439471 | 50.79 |
| 777 | 02a-TricapCubeA-Fe3C2P4_r-21 | -2041.2439010 | 50.82 |
| 778 | 03b-TricapCubeB-Fe4P2C6      | -2041.2438400 | 50.86 |
| 779 | 02a-TricapCubeA-Fe3C3P2      | -2041.2437536 | 50.91 |
| 780 | 02a-TricapCubeA-Fe3C2P4_i-21 | -2041.2437523 | 50.91 |
| 781 | 01a-PentaCapTriPri-Fe2C1P6   | -2041.2436647 | 50.97 |
| 782 | 01b-PentaCapTriPri-Fe2P2C3   | -2041.2433288 | 51.18 |
| 783 | 01a-PentaCapTriPri-Fe2C2P4   | -2041.2432510 | 51.23 |
| 784 | 04b-Icos-1vx-Fe1P3C4         | -2041.2431904 | 51.26 |
| 785 | 03b-TricapCubeB-Fe1P4C3      | -2041.2431803 | 51.27 |
| 786 | 02a-TricapCubeA-Fe4C6P4      | -2041.2431684 | 51.28 |
| 787 | 02a-TricapCubeA-Fe3C5P1      | -2041.2431612 | 51.28 |
| 788 | 01b-PentaCapTriPri-Fe2P3C7   | -2041.2428843 | 51.46 |
| 789 | 04b-Icos-1vx-Fe4P3C4         | -2041.2425380 | 51.67 |
| 790 | 03b-TricapCubeB-Fe3P3C3      | -2041.2423337 | 51.80 |
| 791 | 01a-PentaCapTriPri-Fe2C1P5   | -2041.2413337 | 52.43 |
| 792 | 02a-TricapCubeA-Fe4C2P3      | -2041.2412624 | 52.47 |
| 793 | 03a-TricapCubeB-Fe4C2P5      | -2041.2412093 | 52.51 |
| 794 | 04b-Icos-1vx-Fe4P2C4         | -2041.2411780 | 52.53 |
| 795 | 02b-TricapCubeA-Fe1P2C1      | -2041.2411202 | 52.56 |

|     |                            |               |       |
|-----|----------------------------|---------------|-------|
| 796 | 04b-Icos-1vx-Fe2P1C2       | -2041.2403653 | 53.04 |
| 797 | 02a-TricapCubeA-Fe3C4P6    | -2041.2400405 | 53.24 |
| 798 | 03a-TricapCubeB-Fe4C1P2    | -2041.2392076 | 53.76 |
| 799 | 02a-TricapCubeA-Fe3C1P2    | -2041.2391431 | 53.80 |
| 800 | 02b-TricapCubeA-Fe3P5C2    | -2041.2391295 | 53.81 |
| 801 | 04a-Icos-1vx-Fe2C5P2       | -2041.2386405 | 54.12 |
| 802 | 02a-TricapCubeA-Fe4C7P3    | -2041.2385398 | 54.18 |
| 803 | 04a-Icos-1vx-Fe3C8P2       | -2041.2383103 | 54.33 |
| 804 | 03a-TricapCubeB-Fe4C2P1    | -2041.2382704 | 54.35 |
| 805 | 04b-Icos-1vx-Fe5P3C1       | -2041.2379082 | 54.58 |
| 806 | 04b-Icos-1vx-Fe3P8C2       | -2041.2378495 | 54.62 |
| 807 | 02b-TricapCubeA-Fe4P7C3    | -2041.2378099 | 54.64 |
| 808 | 02b-TricapCubeA-Fe2P4C1    | -2041.2378054 | 54.64 |
| 809 | 03a-TricapCubeB-Fe1C5P1    | -2041.2375889 | 54.78 |
| 810 | 04a-Icos-1vx-Fe2C2P1       | -2041.2375706 | 54.79 |
| 811 | 04a-Icos-1vx-Fe3C3P1       | -2041.2373108 | 54.95 |
| 812 | 03a-TricapCubeB-Fe1C2P5    | -2041.2372627 | 54.98 |
| 813 | 03b-TricapCubeB-Fe3P1C4    | -2041.2372159 | 55.01 |
| 814 | 02a-TricapCubeA-Fe2C4P2    | -2041.2369917 | 55.15 |
| 815 | 04a-Icos-1vx-Fe2C2P8       | -2041.2369870 | 55.16 |
| 816 | 04b-Icos-1vx-Fe2P3C7       | -2041.2369669 | 55.17 |
| 817 | 04b-Icos-1vx-Fe2P2C8       | -2041.2369639 | 55.17 |
| 818 | 04b-Icos-1vx-Fe2P2C7       | -2041.2369527 | 55.18 |
| 819 | 04a-Icos-1vx-Fe2C3P3       | -2041.2369418 | 55.19 |
| 820 | 01a-PentaCapTriPri-Fe2C2P5 | -2041.2368493 | 55.24 |
| 821 | 03a-TricapCubeB-Fe1C3P4    | -2041.2368395 | 55.25 |
| 822 | 01b-PentaCapTriPri-Fe1P2C2 | -2041.2367716 | 55.29 |
| 823 | 02a-TricapCubeA-Fe4C5P3    | -2041.2361113 | 55.71 |
| 824 | 03b-TricapCubeB-Fe1P2C5    | -2041.2361104 | 55.71 |
| 825 | 01b-PentaCapTriPri-Fe2P6C1 | -2041.2360561 | 55.74 |
| 826 | 02b-TricapCubeA-Fe2P2C6    | -2041.2360505 | 55.74 |
| 827 | 04a-Icos-1vx-Fe4C6P1       | -2041.2360362 | 55.75 |
| 828 | 02a-TricapCubeA-Fe3C6P3    | -2041.2360127 | 55.77 |
| 829 | 02a-TricapCubeA-Fe3C2P5    | -2041.2358781 | 55.85 |
| 830 | 02b-TricapCubeA-Fe4P1C9    | -2041.2358677 | 55.86 |
| 831 | 02a-TricapCubeA-Fe3C1P4    | -2041.2358327 | 55.88 |
| 832 | 02b-TricapCubeA-Fe3P1C4    | -2041.2358243 | 55.89 |
| 833 | 01a-PentaCapTriPri-Fe2C2P3 | -2041.2358075 | 55.90 |
| 834 | 04a-Icos-1vx-Fe3C7P3       | -2041.2356461 | 56.00 |
| 835 | 02b-TricapCubeA-Fe1P2C2    | -2041.2354567 | 56.12 |
| 836 | 03b-TricapCubeB-Fe4P3C4    | -2041.2351767 | 56.29 |
| 837 | 03a-TricapCubeB-Fe1C2P4    | -2041.2349461 | 56.44 |

|     |                              |               |       |
|-----|------------------------------|---------------|-------|
| 838 | 04b-Icos-1vx-Fe1P2C2         | -2041.2346735 | 56.61 |
| 839 | 04b-Icos-1vx-Fe3P2C6         | -2041.2345119 | 56.71 |
| 840 | 03a-TricapCubeB-Fe2C1P6      | -2041.2345012 | 56.72 |
| 841 | 03b-TricapCubeB-Fe4P2C5      | -2041.2337528 | 57.19 |
| 842 | 02a-TricapCubeA-Fe4C3P2      | -2041.2337041 | 57.22 |
| 843 | 04a-Icos-1vx-Fe4C2P1         | -2041.2336911 | 57.23 |
| 844 | 02b-TricapCubeA-Fe3P2C3      | -2041.2336139 | 57.27 |
| 845 | 01a-PentaCapTriPri-Fe2C2P1   | -2041.2334307 | 57.39 |
| 846 | 02b-TricapCubeA-Fe2P3C6      | -2041.2333245 | 57.46 |
| 847 | 02b-TricapCubeA-Fe4P1C4      | -2041.2332836 | 57.48 |
| 848 | 01b-PentaCapTriPri-Fe2P3C5   | -2041.2326051 | 57.91 |
| 849 | 01b-PentaCapTriPri-Fe2P5C2   | -2041.2311852 | 58.80 |
| 850 | 01b-PentaCapTriPri-Fe2P2C5   | -2041.2310239 | 58.90 |
| 851 | 03b-TricapCubeB-Fe1P2C8      | -2041.2307056 | 59.10 |
| 852 | 03b-TricapCubeB-Fe1P1C2_i-39 | -2041.2305808 | 59.18 |
| 853 | 02b-TricapCubeA-Fe3P2C5      | -2041.2305557 | 59.19 |
| 854 | 04a-Icos-1vx-Fe5C3P1         | -2041.2301546 | 59.44 |
| 855 | 02b-TricapCubeA-Fe3P5C4      | -2041.2299257 | 59.59 |
| 856 | 02a-TricapCubeA-Fe3C8P1      | -2041.2299125 | 59.60 |
| 857 | 04b-Icos-1vx-Fe5P4C2         | -2041.2297964 | 59.67 |
| 858 | 03a-TricapCubeB-Fe3C6P1      | -2041.2297765 | 59.68 |
| 859 | 04b-Icos-1vx-Fe3P2C1         | -2041.2297652 | 59.69 |
| 860 | 03b-TricapCubeB-Fe4P1C2      | -2041.2297067 | 59.73 |
| 861 | 03a-TricapCubeB-Fe2C1P9      | -2041.2290050 | 60.17 |
| 862 | 01a-PentaCapTriPri-Fe2C5P2   | -2041.2288738 | 60.25 |
| 863 | 01a-PentaCapTriPri-Fe2C3P2   | -2041.2284198 | 60.53 |
| 864 | 04b-Icos-1vx-Fe2P1C8         | -2041.2283297 | 60.59 |
| 865 | 04b-Icos-1vx-Fe2P3C5_i-13    | -2041.2277517 | 60.95 |
| 866 | 02a-TricapCubeA-Fe1C1P3      | -2041.2275194 | 61.10 |
| 867 | 04a-Icos-1vx-Fe5C2P1         | -2041.2275047 | 61.11 |
| 868 | 03a-TricapCubeB-Fe3C2P1      | -2041.2274620 | 61.13 |
| 869 | 03a-TricapCubeB-Fe3C1P1      | -2041.2274569 | 61.14 |
| 870 | 04a-Icos-1vx-Fe4C2P4         | -2041.2273964 | 61.18 |
| 871 | 02b-TricapCubeA-Fe4P2C3      | -2041.2273531 | 61.20 |
| 872 | 04b-Icos-1vx-Fe3P3C1         | -2041.2272961 | 61.24 |
| 873 | 01a-PentaCapTriPri-Fe2C1P2   | -2041.2271671 | 61.32 |
| 874 | 01a-PentaCapTriPri-Fe2C6P1   | -2041.2258629 | 62.14 |
| 875 | 03b-TricapCubeB-Fe1P4C2      | -2041.2258086 | 62.17 |
| 876 | 03b-TricapCubeB-Fe2P3C5      | -2041.2257130 | 62.23 |
| 877 | 02a-TricapCubeA-Fe4C2P5      | -2041.2254859 | 62.37 |
| 878 | 02b-TricapCubeA-Fe3P7C3      | -2041.2247078 | 62.86 |
| 879 | 04b-Icos-1vx-Fe4P5C2         | -2041.2243584 | 63.08 |

|     |                            |               |       |
|-----|----------------------------|---------------|-------|
| 880 | 01b-PentaCapTriPri-Fe1P3C3 | -2041.2243190 | 63.11 |
| 881 | 01a-PentaCapTriPri-Fe1C3P3 | -2041.2242871 | 63.13 |
| 882 | 01b-PentaCapTriPri-Fe2P3C1 | -2041.2242212 | 63.17 |
| 883 | 02a-TricapCubeA-Fe4C7P2    | -2041.2237168 | 63.48 |
| 884 | 04a-Icos-1vx-Fe3C2P6       | -2041.2237147 | 63.49 |
| 885 | 02b-TricapCubeA-Fe3P1C2    | -2041.2236268 | 63.54 |
| 886 | 01a-PentaCapTriPri-Fe2C3P3 | -2041.2235791 | 63.57 |
| 887 | 02b-TricapCubeA-Fe3P3C5    | -2041.2230671 | 63.89 |
| 888 | 03b-TricapCubeB-Fe4P6C1    | -2041.2227872 | 64.07 |
| 889 | 03b-TricapCubeB-Fe2P1C1    | -2041.2227048 | 64.12 |
| 890 | 02a-TricapCubeA-Fe3C2P1    | -2041.2220833 | 64.51 |
| 891 | 03a-TricapCubeB-Fe2C4P3    | -2041.2217689 | 64.71 |
| 892 | 03a-TricapCubeB-Fe2C3P4    | -2041.2217614 | 64.71 |
| 893 | 02a-TricapCubeA-Fe3C3P5    | -2041.2215329 | 64.85 |
| 894 | 03b-TricapCubeB-Fe1P2C4    | -2041.2202599 | 65.65 |
| 895 | 02b-TricapCubeA-Fe3P2C6    | -2041.2192918 | 66.26 |
| 896 | 02b-TricapCubeA-Fe3P3C3    | -2041.2181069 | 67.00 |
| 897 | 03b-TricapCubeB-Fe1P6C1    | -2041.2172290 | 67.56 |
| 898 | 01a-PentaCapTriPri-Fe1C2P1 | -2041.2168527 | 67.79 |
| 899 | 04a-Icos-1vx-Fe5C2P2       | -2041.2150633 | 68.91 |
| 900 | 03b-TricapCubeB-Fe2P6C1    | -2041.2141138 | 69.51 |
| 901 | 03b-TricapCubeB-Fe2P2C5    | -2041.2140039 | 69.58 |
| 902 | 03b-TricapCubeB-Fe3P1C2    | -2041.2139392 | 69.62 |
| 903 | 04b-Icos-1vx-Fe2P2C4       | -2041.2135591 | 69.86 |
| 904 | 03a-TricapCubeB-Fe4C3P4    | -2041.2130176 | 70.20 |
| 905 | 02b-TricapCubeA-Fe3P2C8    | -2041.2124886 | 70.53 |
| 906 | 03a-TricapCubeB-Fe2C6P1    | -2041.2091265 | 72.64 |
| 907 | 03a-TricapCubeB-Fe2C2P5    | -2041.2090418 | 72.69 |
| 908 | 01a-PentaCapTriPri-Fe2C4P6 | -2041.2082500 | 73.19 |
| 909 | 03a-TricapCubeB-Fe1C6P1    | -2041.2067183 | 74.15 |
| 910 | 02a-TricapCubeA-Fe3C3P3    | -2041.2065131 | 74.28 |
| 911 | 02a-TricapCubeA-Fe3C7P3    | -2041.2056774 | 74.80 |
| 912 | 03a-TricapCubeB-Fe2C3P1    | -2041.2051783 | 75.12 |
| 913 | 03a-TricapCubeB-Fe2C3P6    | -2041.2051594 | 75.13 |
| 914 | 03b-TricapCubeB-Fe2P3C1    | -2041.2051422 | 75.14 |
| 915 | 03b-TricapCubeB-Fe2P2C4    | -2041.2033642 | 76.26 |
| 916 | 02a-TricapCubeA-Fe3C4P4    | -2041.2026042 | 76.73 |
| 917 | 02a-TricapCubeA-Fe2C1P5    | -2041.2021831 | 77.00 |
| 918 | 01b-PentaCapTriPri-Fe1P2C1 | -2041.2010676 | 77.70 |
| 919 | 03b-TricapCubeB-Fe2P3C2    | -2041.1968899 | 80.32 |
| 920 | 01a-PentaCapTriPri-Fe1C3P1 | -2041.1947200 | 81.68 |
| 921 | 01b-PentaCapTriPri-Fe2P1C4 | -2041.1946943 | 81.70 |



|     |                            |               |        |
|-----|----------------------------|---------------|--------|
| 922 | 04a-Icos-1vx-Fe3C7P1       | -2041.1944616 | 81.84  |
| 923 | 01a-PentaCapTriPri-Fe2C1P3 | -2041.1937933 | 82.26  |
| 924 | 02a-TricapCubeA-Fe3C4P2    | -2041.1894288 | 85.00  |
| 925 | 02b-TricapCubeA-Fe3P6C4    | -2041.1875753 | 86.16  |
| 926 | 04b-Icos-1vx-Fe2P3C6       | -2041.1827757 | 89.18  |
| 927 | 04a-Icos-1vx-Fe2C3P6       | -2041.1827093 | 89.22  |
| 928 | 01b-PentaCapTriPri-Fe2P4C6 | -2041.1803776 | 90.68  |
| 929 | 02a-TricapCubeA-Fe4C8P2    | -2041.1766253 | 93.04  |
| 930 | 02b-TricapCubeA-Fe2P4C3    | -2041.1750046 | 94.05  |
| 931 | 01b-PentaCapTriPri-Fe2P3C2 | -2041.1740024 | 94.68  |
| 932 | 01a-PentaCapTriPri-Fe1C1P1 | -2041.1730575 | 95.27  |
| 933 | 01b-PentaCapTriPri-Fe2P1C3 | -2041.1705343 | 96.86  |
| 934 | 02b-TricapCubeA-Fe4P8C1    | -2041.1667870 | 99.21  |
| 935 | 01b-PentaCapTriPri-Fe2P1C6 | -2041.1619009 | 102.27 |
| 936 | 01b-PentaCapTriPri-Fe2P3C6 | -2041.1613984 | 102.59 |
| 937 | 02b-TricapCubeA-Fe1P3C1    | -2041.1507641 | 109.26 |
| 938 | 02a-TricapCubeA-Fe1C3P1    | -2041.1507584 | 109.27 |

Table S5A. Initial CpFeCHPHB<sub>9</sub>H<sub>9</sub> structures, 304 in all.

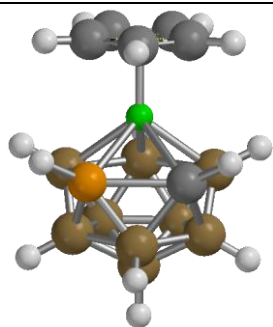

Icosahedron 18

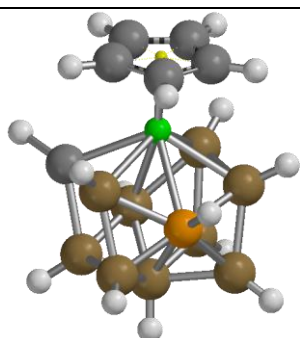

Cubeoctahedron 110

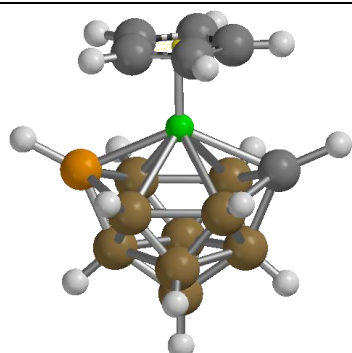

Anticubeoctahedron 176

Table S5B. Distance table for the lowest-lying CpFeCHPCH<sub>3</sub>B<sub>9</sub>H<sub>9</sub> structures after M06L/6-311G(d,p) optimization. Included are the ZPcorrected E (a.u.), relative energy (kcal/mol), HOMO/LUMO gaps (eV) and symmetry.

| 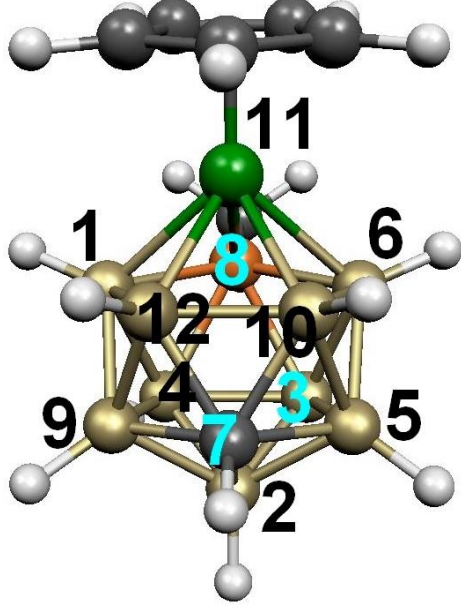 <p>1. -2106.13477850 0.0<br/>Cs H/L 3.17</p>               | <table border="1"> <thead> <tr> <th></th> <th>1</th> <th>2</th> <th>3</th> <th>4</th> <th>5</th> </tr> </thead> <tbody> <tr><td>1</td><td>B</td><td>0.000000</td><td></td><td></td><td></td></tr> <tr><td>2</td><td>B</td><td>2.919404</td><td>0.000000</td><td></td><td></td></tr> <tr><td>3</td><td>B</td><td>3.050288</td><td>1.746854</td><td>0.000000</td><td></td></tr> <tr><td>4</td><td>B</td><td>1.883695</td><td>1.746791</td><td>1.854900</td><td>0.000000</td></tr> <tr><td>5</td><td>B</td><td>3.457189</td><td>1.768423</td><td>1.752662</td><td>2.895354</td><td>0.000000</td></tr> <tr><td>6</td><td>B</td><td>3.103100</td><td>2.919500</td><td>1.883849</td><td>3.050380</td><td>1.751201</td></tr> <tr><td>7</td><td>C</td><td>2.745212</td><td>1.679179</td><td>2.722261</td><td>2.722221</td><td>1.681293</td></tr> <tr><td>8</td><td>P</td><td>1.984806</td><td>3.022159</td><td>1.970692</td><td>1.970737</td><td>3.015029</td></tr> <tr><td>9</td><td>B</td><td>1.751200</td><td>1.768344</td><td>2.895348</td><td>1.752612</td><td>2.863400</td></tr> <tr><td>10</td><td>B</td><td>2.933325</td><td>2.875426</td><td>2.906151</td><td>3.426851</td><td>1.781301</td></tr> <tr><td>11</td><td>Fe</td><td>2.137921</td><td>3.853364</td><td>3.364205</td><td>3.364153</td><td>3.291705</td></tr> <tr><td>12</td><td>B</td><td>1.756902</td><td>2.875339</td><td>3.426848</td><td>2.905939</td><td>2.874791</td></tr> <tr> <td></td> <td>6</td> <td>7</td> <td>8</td> <td>9</td> <td>10</td> </tr> <tr><td>7</td><td>C</td><td>2.745182</td><td>0.000000</td><td></td><td></td></tr> <tr><td>8</td><td>P</td><td>1.984856</td><td>3.356851</td><td>0.000000</td><td></td></tr> <tr><td>9</td><td>B</td><td>3.457179</td><td>1.681257</td><td>3.015044</td><td>0.000000</td></tr> <tr><td>10</td><td>B</td><td>1.757011</td><td>1.698931</td><td>2.997504</td><td>2.874663</td><td>0.000000</td></tr> <tr><td>11</td><td>Fe</td><td>2.137961</td><td>3.151228</td><td>2.101469</td><td>3.291625</td><td>2.064474</td></tr> <tr><td>12</td><td>B</td><td>2.933367</td><td>1.698988</td><td>2.997444</td><td>1.781082</td><td>1.778100</td></tr> <tr> <td></td> <td>11</td> <td>12</td> <td></td> <td></td> <td></td> </tr> <tr><td>12</td><td>B</td><td>2.064472</td><td>0.000000</td><td></td><td></td></tr> </tbody> </table> |          | 1        | 2        | 3        | 4        | 5 | 1 | B | 0.000000 |  |  |  | 2 | B | 2.919404 | 0.000000 |  |  | 3 | B | 3.050288 | 1.746854 | 0.000000 |  | 4 | B | 1.883695 | 1.746791 | 1.854900 | 0.000000 | 5 | B | 3.457189 | 1.768423 | 1.752662 | 2.895354 | 0.000000 | 6 | B | 3.103100 | 2.919500 | 1.883849 | 3.050380 | 1.751201 | 7 | C | 2.745212 | 1.679179 | 2.722261 | 2.722221 | 1.681293 | 8 | P | 1.984806 | 3.022159 | 1.970692 | 1.970737 | 3.015029 | 9 | B | 1.751200 | 1.768344 | 2.895348 | 1.752612 | 2.863400 | 10 | B | 2.933325 | 2.875426 | 2.906151 | 3.426851 | 1.781301 | 11 | Fe | 2.137921 | 3.853364 | 3.364205 | 3.364153 | 3.291705 | 12 | B | 1.756902 | 2.875339 | 3.426848 | 2.905939 | 2.874791 |  | 6 | 7 | 8 | 9 | 10 | 7 | C | 2.745182 | 0.000000 |  |  | 8 | P | 1.984856 | 3.356851 | 0.000000 |  | 9 | B | 3.457179 | 1.681257 | 3.015044 | 0.000000 | 10 | B | 1.757011 | 1.698931 | 2.997504 | 2.874663 | 0.000000 | 11 | Fe | 2.137961 | 3.151228 | 2.101469 | 3.291625 | 2.064474 | 12 | B | 2.933367 | 1.698988 | 2.997444 | 1.781082 | 1.778100 |  | 11 | 12 |  |  |  | 12 | B | 2.064472 | 0.000000 |  |  |
|----------------------------------------------------------------------------------------------------------------------------------------------|-----------------------------------------------------------------------------------------------------------------------------------------------------------------------------------------------------------------------------------------------------------------------------------------------------------------------------------------------------------------------------------------------------------------------------------------------------------------------------------------------------------------------------------------------------------------------------------------------------------------------------------------------------------------------------------------------------------------------------------------------------------------------------------------------------------------------------------------------------------------------------------------------------------------------------------------------------------------------------------------------------------------------------------------------------------------------------------------------------------------------------------------------------------------------------------------------------------------------------------------------------------------------------------------------------------------------------------------------------------------------------------------------------------------------------------------------------------------------------------------------------------------------------------------------------------------------------------------------------------------------------------------------------------------------------------------------------------------------------------------------------------------------------------------------------------------------------------------------------------------------------------------------------------------------------------------------------------------------------------------------------------------------------------------------------------------------------------------------------------------------------------------------------------------------------------------------------------------------------------------------------------------------------------------------------------------------------------------------------|----------|----------|----------|----------|----------|---|---|---|----------|--|--|--|---|---|----------|----------|--|--|---|---|----------|----------|----------|--|---|---|----------|----------|----------|----------|---|---|----------|----------|----------|----------|----------|---|---|----------|----------|----------|----------|----------|---|---|----------|----------|----------|----------|----------|---|---|----------|----------|----------|----------|----------|---|---|----------|----------|----------|----------|----------|----|---|----------|----------|----------|----------|----------|----|----|----------|----------|----------|----------|----------|----|---|----------|----------|----------|----------|----------|--|---|---|---|---|----|---|---|----------|----------|--|--|---|---|----------|----------|----------|--|---|---|----------|----------|----------|----------|----|---|----------|----------|----------|----------|----------|----|----|----------|----------|----------|----------|----------|----|---|----------|----------|----------|----------|----------|--|----|----|--|--|--|----|---|----------|----------|--|--|
|                                                                                                                                              | 1                                                                                                                                                                                                                                                                                                                                                                                                                                                                                                                                                                                                                                                                                                                                                                                                                                                                                                                                                                                                                                                                                                                                                                                                                                                                                                                                                                                                                                                                                                                                                                                                                                                                                                                                                                                                                                                                                                                                                                                                                                                                                                                                                                                                                                                                                                                                                   | 2        | 3        | 4        | 5        |          |   |   |   |          |  |  |  |   |   |          |          |  |  |   |   |          |          |          |  |   |   |          |          |          |          |   |   |          |          |          |          |          |   |   |          |          |          |          |          |   |   |          |          |          |          |          |   |   |          |          |          |          |          |   |   |          |          |          |          |          |    |   |          |          |          |          |          |    |    |          |          |          |          |          |    |   |          |          |          |          |          |  |   |   |   |   |    |   |   |          |          |  |  |   |   |          |          |          |  |   |   |          |          |          |          |    |   |          |          |          |          |          |    |    |          |          |          |          |          |    |   |          |          |          |          |          |  |    |    |  |  |  |    |   |          |          |  |  |
| 1                                                                                                                                            | B                                                                                                                                                                                                                                                                                                                                                                                                                                                                                                                                                                                                                                                                                                                                                                                                                                                                                                                                                                                                                                                                                                                                                                                                                                                                                                                                                                                                                                                                                                                                                                                                                                                                                                                                                                                                                                                                                                                                                                                                                                                                                                                                                                                                                                                                                                                                                   | 0.000000 |          |          |          |          |   |   |   |          |  |  |  |   |   |          |          |  |  |   |   |          |          |          |  |   |   |          |          |          |          |   |   |          |          |          |          |          |   |   |          |          |          |          |          |   |   |          |          |          |          |          |   |   |          |          |          |          |          |   |   |          |          |          |          |          |    |   |          |          |          |          |          |    |    |          |          |          |          |          |    |   |          |          |          |          |          |  |   |   |   |   |    |   |   |          |          |  |  |   |   |          |          |          |  |   |   |          |          |          |          |    |   |          |          |          |          |          |    |    |          |          |          |          |          |    |   |          |          |          |          |          |  |    |    |  |  |  |    |   |          |          |  |  |
| 2                                                                                                                                            | B                                                                                                                                                                                                                                                                                                                                                                                                                                                                                                                                                                                                                                                                                                                                                                                                                                                                                                                                                                                                                                                                                                                                                                                                                                                                                                                                                                                                                                                                                                                                                                                                                                                                                                                                                                                                                                                                                                                                                                                                                                                                                                                                                                                                                                                                                                                                                   | 2.919404 | 0.000000 |          |          |          |   |   |   |          |  |  |  |   |   |          |          |  |  |   |   |          |          |          |  |   |   |          |          |          |          |   |   |          |          |          |          |          |   |   |          |          |          |          |          |   |   |          |          |          |          |          |   |   |          |          |          |          |          |   |   |          |          |          |          |          |    |   |          |          |          |          |          |    |    |          |          |          |          |          |    |   |          |          |          |          |          |  |   |   |   |   |    |   |   |          |          |  |  |   |   |          |          |          |  |   |   |          |          |          |          |    |   |          |          |          |          |          |    |    |          |          |          |          |          |    |   |          |          |          |          |          |  |    |    |  |  |  |    |   |          |          |  |  |
| 3                                                                                                                                            | B                                                                                                                                                                                                                                                                                                                                                                                                                                                                                                                                                                                                                                                                                                                                                                                                                                                                                                                                                                                                                                                                                                                                                                                                                                                                                                                                                                                                                                                                                                                                                                                                                                                                                                                                                                                                                                                                                                                                                                                                                                                                                                                                                                                                                                                                                                                                                   | 3.050288 | 1.746854 | 0.000000 |          |          |   |   |   |          |  |  |  |   |   |          |          |  |  |   |   |          |          |          |  |   |   |          |          |          |          |   |   |          |          |          |          |          |   |   |          |          |          |          |          |   |   |          |          |          |          |          |   |   |          |          |          |          |          |   |   |          |          |          |          |          |    |   |          |          |          |          |          |    |    |          |          |          |          |          |    |   |          |          |          |          |          |  |   |   |   |   |    |   |   |          |          |  |  |   |   |          |          |          |  |   |   |          |          |          |          |    |   |          |          |          |          |          |    |    |          |          |          |          |          |    |   |          |          |          |          |          |  |    |    |  |  |  |    |   |          |          |  |  |
| 4                                                                                                                                            | B                                                                                                                                                                                                                                                                                                                                                                                                                                                                                                                                                                                                                                                                                                                                                                                                                                                                                                                                                                                                                                                                                                                                                                                                                                                                                                                                                                                                                                                                                                                                                                                                                                                                                                                                                                                                                                                                                                                                                                                                                                                                                                                                                                                                                                                                                                                                                   | 1.883695 | 1.746791 | 1.854900 | 0.000000 |          |   |   |   |          |  |  |  |   |   |          |          |  |  |   |   |          |          |          |  |   |   |          |          |          |          |   |   |          |          |          |          |          |   |   |          |          |          |          |          |   |   |          |          |          |          |          |   |   |          |          |          |          |          |   |   |          |          |          |          |          |    |   |          |          |          |          |          |    |    |          |          |          |          |          |    |   |          |          |          |          |          |  |   |   |   |   |    |   |   |          |          |  |  |   |   |          |          |          |  |   |   |          |          |          |          |    |   |          |          |          |          |          |    |    |          |          |          |          |          |    |   |          |          |          |          |          |  |    |    |  |  |  |    |   |          |          |  |  |
| 5                                                                                                                                            | B                                                                                                                                                                                                                                                                                                                                                                                                                                                                                                                                                                                                                                                                                                                                                                                                                                                                                                                                                                                                                                                                                                                                                                                                                                                                                                                                                                                                                                                                                                                                                                                                                                                                                                                                                                                                                                                                                                                                                                                                                                                                                                                                                                                                                                                                                                                                                   | 3.457189 | 1.768423 | 1.752662 | 2.895354 | 0.000000 |   |   |   |          |  |  |  |   |   |          |          |  |  |   |   |          |          |          |  |   |   |          |          |          |          |   |   |          |          |          |          |          |   |   |          |          |          |          |          |   |   |          |          |          |          |          |   |   |          |          |          |          |          |   |   |          |          |          |          |          |    |   |          |          |          |          |          |    |    |          |          |          |          |          |    |   |          |          |          |          |          |  |   |   |   |   |    |   |   |          |          |  |  |   |   |          |          |          |  |   |   |          |          |          |          |    |   |          |          |          |          |          |    |    |          |          |          |          |          |    |   |          |          |          |          |          |  |    |    |  |  |  |    |   |          |          |  |  |
| 6                                                                                                                                            | B                                                                                                                                                                                                                                                                                                                                                                                                                                                                                                                                                                                                                                                                                                                                                                                                                                                                                                                                                                                                                                                                                                                                                                                                                                                                                                                                                                                                                                                                                                                                                                                                                                                                                                                                                                                                                                                                                                                                                                                                                                                                                                                                                                                                                                                                                                                                                   | 3.103100 | 2.919500 | 1.883849 | 3.050380 | 1.751201 |   |   |   |          |  |  |  |   |   |          |          |  |  |   |   |          |          |          |  |   |   |          |          |          |          |   |   |          |          |          |          |          |   |   |          |          |          |          |          |   |   |          |          |          |          |          |   |   |          |          |          |          |          |   |   |          |          |          |          |          |    |   |          |          |          |          |          |    |    |          |          |          |          |          |    |   |          |          |          |          |          |  |   |   |   |   |    |   |   |          |          |  |  |   |   |          |          |          |  |   |   |          |          |          |          |    |   |          |          |          |          |          |    |    |          |          |          |          |          |    |   |          |          |          |          |          |  |    |    |  |  |  |    |   |          |          |  |  |
| 7                                                                                                                                            | C                                                                                                                                                                                                                                                                                                                                                                                                                                                                                                                                                                                                                                                                                                                                                                                                                                                                                                                                                                                                                                                                                                                                                                                                                                                                                                                                                                                                                                                                                                                                                                                                                                                                                                                                                                                                                                                                                                                                                                                                                                                                                                                                                                                                                                                                                                                                                   | 2.745212 | 1.679179 | 2.722261 | 2.722221 | 1.681293 |   |   |   |          |  |  |  |   |   |          |          |  |  |   |   |          |          |          |  |   |   |          |          |          |          |   |   |          |          |          |          |          |   |   |          |          |          |          |          |   |   |          |          |          |          |          |   |   |          |          |          |          |          |   |   |          |          |          |          |          |    |   |          |          |          |          |          |    |    |          |          |          |          |          |    |   |          |          |          |          |          |  |   |   |   |   |    |   |   |          |          |  |  |   |   |          |          |          |  |   |   |          |          |          |          |    |   |          |          |          |          |          |    |    |          |          |          |          |          |    |   |          |          |          |          |          |  |    |    |  |  |  |    |   |          |          |  |  |
| 8                                                                                                                                            | P                                                                                                                                                                                                                                                                                                                                                                                                                                                                                                                                                                                                                                                                                                                                                                                                                                                                                                                                                                                                                                                                                                                                                                                                                                                                                                                                                                                                                                                                                                                                                                                                                                                                                                                                                                                                                                                                                                                                                                                                                                                                                                                                                                                                                                                                                                                                                   | 1.984806 | 3.022159 | 1.970692 | 1.970737 | 3.015029 |   |   |   |          |  |  |  |   |   |          |          |  |  |   |   |          |          |          |  |   |   |          |          |          |          |   |   |          |          |          |          |          |   |   |          |          |          |          |          |   |   |          |          |          |          |          |   |   |          |          |          |          |          |   |   |          |          |          |          |          |    |   |          |          |          |          |          |    |    |          |          |          |          |          |    |   |          |          |          |          |          |  |   |   |   |   |    |   |   |          |          |  |  |   |   |          |          |          |  |   |   |          |          |          |          |    |   |          |          |          |          |          |    |    |          |          |          |          |          |    |   |          |          |          |          |          |  |    |    |  |  |  |    |   |          |          |  |  |
| 9                                                                                                                                            | B                                                                                                                                                                                                                                                                                                                                                                                                                                                                                                                                                                                                                                                                                                                                                                                                                                                                                                                                                                                                                                                                                                                                                                                                                                                                                                                                                                                                                                                                                                                                                                                                                                                                                                                                                                                                                                                                                                                                                                                                                                                                                                                                                                                                                                                                                                                                                   | 1.751200 | 1.768344 | 2.895348 | 1.752612 | 2.863400 |   |   |   |          |  |  |  |   |   |          |          |  |  |   |   |          |          |          |  |   |   |          |          |          |          |   |   |          |          |          |          |          |   |   |          |          |          |          |          |   |   |          |          |          |          |          |   |   |          |          |          |          |          |   |   |          |          |          |          |          |    |   |          |          |          |          |          |    |    |          |          |          |          |          |    |   |          |          |          |          |          |  |   |   |   |   |    |   |   |          |          |  |  |   |   |          |          |          |  |   |   |          |          |          |          |    |   |          |          |          |          |          |    |    |          |          |          |          |          |    |   |          |          |          |          |          |  |    |    |  |  |  |    |   |          |          |  |  |
| 10                                                                                                                                           | B                                                                                                                                                                                                                                                                                                                                                                                                                                                                                                                                                                                                                                                                                                                                                                                                                                                                                                                                                                                                                                                                                                                                                                                                                                                                                                                                                                                                                                                                                                                                                                                                                                                                                                                                                                                                                                                                                                                                                                                                                                                                                                                                                                                                                                                                                                                                                   | 2.933325 | 2.875426 | 2.906151 | 3.426851 | 1.781301 |   |   |   |          |  |  |  |   |   |          |          |  |  |   |   |          |          |          |  |   |   |          |          |          |          |   |   |          |          |          |          |          |   |   |          |          |          |          |          |   |   |          |          |          |          |          |   |   |          |          |          |          |          |   |   |          |          |          |          |          |    |   |          |          |          |          |          |    |    |          |          |          |          |          |    |   |          |          |          |          |          |  |   |   |   |   |    |   |   |          |          |  |  |   |   |          |          |          |  |   |   |          |          |          |          |    |   |          |          |          |          |          |    |    |          |          |          |          |          |    |   |          |          |          |          |          |  |    |    |  |  |  |    |   |          |          |  |  |
| 11                                                                                                                                           | Fe                                                                                                                                                                                                                                                                                                                                                                                                                                                                                                                                                                                                                                                                                                                                                                                                                                                                                                                                                                                                                                                                                                                                                                                                                                                                                                                                                                                                                                                                                                                                                                                                                                                                                                                                                                                                                                                                                                                                                                                                                                                                                                                                                                                                                                                                                                                                                  | 2.137921 | 3.853364 | 3.364205 | 3.364153 | 3.291705 |   |   |   |          |  |  |  |   |   |          |          |  |  |   |   |          |          |          |  |   |   |          |          |          |          |   |   |          |          |          |          |          |   |   |          |          |          |          |          |   |   |          |          |          |          |          |   |   |          |          |          |          |          |   |   |          |          |          |          |          |    |   |          |          |          |          |          |    |    |          |          |          |          |          |    |   |          |          |          |          |          |  |   |   |   |   |    |   |   |          |          |  |  |   |   |          |          |          |  |   |   |          |          |          |          |    |   |          |          |          |          |          |    |    |          |          |          |          |          |    |   |          |          |          |          |          |  |    |    |  |  |  |    |   |          |          |  |  |
| 12                                                                                                                                           | B                                                                                                                                                                                                                                                                                                                                                                                                                                                                                                                                                                                                                                                                                                                                                                                                                                                                                                                                                                                                                                                                                                                                                                                                                                                                                                                                                                                                                                                                                                                                                                                                                                                                                                                                                                                                                                                                                                                                                                                                                                                                                                                                                                                                                                                                                                                                                   | 1.756902 | 2.875339 | 3.426848 | 2.905939 | 2.874791 |   |   |   |          |  |  |  |   |   |          |          |  |  |   |   |          |          |          |  |   |   |          |          |          |          |   |   |          |          |          |          |          |   |   |          |          |          |          |          |   |   |          |          |          |          |          |   |   |          |          |          |          |          |   |   |          |          |          |          |          |    |   |          |          |          |          |          |    |    |          |          |          |          |          |    |   |          |          |          |          |          |  |   |   |   |   |    |   |   |          |          |  |  |   |   |          |          |          |  |   |   |          |          |          |          |    |   |          |          |          |          |          |    |    |          |          |          |          |          |    |   |          |          |          |          |          |  |    |    |  |  |  |    |   |          |          |  |  |
|                                                                                                                                              | 6                                                                                                                                                                                                                                                                                                                                                                                                                                                                                                                                                                                                                                                                                                                                                                                                                                                                                                                                                                                                                                                                                                                                                                                                                                                                                                                                                                                                                                                                                                                                                                                                                                                                                                                                                                                                                                                                                                                                                                                                                                                                                                                                                                                                                                                                                                                                                   | 7        | 8        | 9        | 10       |          |   |   |   |          |  |  |  |   |   |          |          |  |  |   |   |          |          |          |  |   |   |          |          |          |          |   |   |          |          |          |          |          |   |   |          |          |          |          |          |   |   |          |          |          |          |          |   |   |          |          |          |          |          |   |   |          |          |          |          |          |    |   |          |          |          |          |          |    |    |          |          |          |          |          |    |   |          |          |          |          |          |  |   |   |   |   |    |   |   |          |          |  |  |   |   |          |          |          |  |   |   |          |          |          |          |    |   |          |          |          |          |          |    |    |          |          |          |          |          |    |   |          |          |          |          |          |  |    |    |  |  |  |    |   |          |          |  |  |
| 7                                                                                                                                            | C                                                                                                                                                                                                                                                                                                                                                                                                                                                                                                                                                                                                                                                                                                                                                                                                                                                                                                                                                                                                                                                                                                                                                                                                                                                                                                                                                                                                                                                                                                                                                                                                                                                                                                                                                                                                                                                                                                                                                                                                                                                                                                                                                                                                                                                                                                                                                   | 2.745182 | 0.000000 |          |          |          |   |   |   |          |  |  |  |   |   |          |          |  |  |   |   |          |          |          |  |   |   |          |          |          |          |   |   |          |          |          |          |          |   |   |          |          |          |          |          |   |   |          |          |          |          |          |   |   |          |          |          |          |          |   |   |          |          |          |          |          |    |   |          |          |          |          |          |    |    |          |          |          |          |          |    |   |          |          |          |          |          |  |   |   |   |   |    |   |   |          |          |  |  |   |   |          |          |          |  |   |   |          |          |          |          |    |   |          |          |          |          |          |    |    |          |          |          |          |          |    |   |          |          |          |          |          |  |    |    |  |  |  |    |   |          |          |  |  |
| 8                                                                                                                                            | P                                                                                                                                                                                                                                                                                                                                                                                                                                                                                                                                                                                                                                                                                                                                                                                                                                                                                                                                                                                                                                                                                                                                                                                                                                                                                                                                                                                                                                                                                                                                                                                                                                                                                                                                                                                                                                                                                                                                                                                                                                                                                                                                                                                                                                                                                                                                                   | 1.984856 | 3.356851 | 0.000000 |          |          |   |   |   |          |  |  |  |   |   |          |          |  |  |   |   |          |          |          |  |   |   |          |          |          |          |   |   |          |          |          |          |          |   |   |          |          |          |          |          |   |   |          |          |          |          |          |   |   |          |          |          |          |          |   |   |          |          |          |          |          |    |   |          |          |          |          |          |    |    |          |          |          |          |          |    |   |          |          |          |          |          |  |   |   |   |   |    |   |   |          |          |  |  |   |   |          |          |          |  |   |   |          |          |          |          |    |   |          |          |          |          |          |    |    |          |          |          |          |          |    |   |          |          |          |          |          |  |    |    |  |  |  |    |   |          |          |  |  |
| 9                                                                                                                                            | B                                                                                                                                                                                                                                                                                                                                                                                                                                                                                                                                                                                                                                                                                                                                                                                                                                                                                                                                                                                                                                                                                                                                                                                                                                                                                                                                                                                                                                                                                                                                                                                                                                                                                                                                                                                                                                                                                                                                                                                                                                                                                                                                                                                                                                                                                                                                                   | 3.457179 | 1.681257 | 3.015044 | 0.000000 |          |   |   |   |          |  |  |  |   |   |          |          |  |  |   |   |          |          |          |  |   |   |          |          |          |          |   |   |          |          |          |          |          |   |   |          |          |          |          |          |   |   |          |          |          |          |          |   |   |          |          |          |          |          |   |   |          |          |          |          |          |    |   |          |          |          |          |          |    |    |          |          |          |          |          |    |   |          |          |          |          |          |  |   |   |   |   |    |   |   |          |          |  |  |   |   |          |          |          |  |   |   |          |          |          |          |    |   |          |          |          |          |          |    |    |          |          |          |          |          |    |   |          |          |          |          |          |  |    |    |  |  |  |    |   |          |          |  |  |
| 10                                                                                                                                           | B                                                                                                                                                                                                                                                                                                                                                                                                                                                                                                                                                                                                                                                                                                                                                                                                                                                                                                                                                                                                                                                                                                                                                                                                                                                                                                                                                                                                                                                                                                                                                                                                                                                                                                                                                                                                                                                                                                                                                                                                                                                                                                                                                                                                                                                                                                                                                   | 1.757011 | 1.698931 | 2.997504 | 2.874663 | 0.000000 |   |   |   |          |  |  |  |   |   |          |          |  |  |   |   |          |          |          |  |   |   |          |          |          |          |   |   |          |          |          |          |          |   |   |          |          |          |          |          |   |   |          |          |          |          |          |   |   |          |          |          |          |          |   |   |          |          |          |          |          |    |   |          |          |          |          |          |    |    |          |          |          |          |          |    |   |          |          |          |          |          |  |   |   |   |   |    |   |   |          |          |  |  |   |   |          |          |          |  |   |   |          |          |          |          |    |   |          |          |          |          |          |    |    |          |          |          |          |          |    |   |          |          |          |          |          |  |    |    |  |  |  |    |   |          |          |  |  |
| 11                                                                                                                                           | Fe                                                                                                                                                                                                                                                                                                                                                                                                                                                                                                                                                                                                                                                                                                                                                                                                                                                                                                                                                                                                                                                                                                                                                                                                                                                                                                                                                                                                                                                                                                                                                                                                                                                                                                                                                                                                                                                                                                                                                                                                                                                                                                                                                                                                                                                                                                                                                  | 2.137961 | 3.151228 | 2.101469 | 3.291625 | 2.064474 |   |   |   |          |  |  |  |   |   |          |          |  |  |   |   |          |          |          |  |   |   |          |          |          |          |   |   |          |          |          |          |          |   |   |          |          |          |          |          |   |   |          |          |          |          |          |   |   |          |          |          |          |          |   |   |          |          |          |          |          |    |   |          |          |          |          |          |    |    |          |          |          |          |          |    |   |          |          |          |          |          |  |   |   |   |   |    |   |   |          |          |  |  |   |   |          |          |          |  |   |   |          |          |          |          |    |   |          |          |          |          |          |    |    |          |          |          |          |          |    |   |          |          |          |          |          |  |    |    |  |  |  |    |   |          |          |  |  |
| 12                                                                                                                                           | B                                                                                                                                                                                                                                                                                                                                                                                                                                                                                                                                                                                                                                                                                                                                                                                                                                                                                                                                                                                                                                                                                                                                                                                                                                                                                                                                                                                                                                                                                                                                                                                                                                                                                                                                                                                                                                                                                                                                                                                                                                                                                                                                                                                                                                                                                                                                                   | 2.933367 | 1.698988 | 2.997444 | 1.781082 | 1.778100 |   |   |   |          |  |  |  |   |   |          |          |  |  |   |   |          |          |          |  |   |   |          |          |          |          |   |   |          |          |          |          |          |   |   |          |          |          |          |          |   |   |          |          |          |          |          |   |   |          |          |          |          |          |   |   |          |          |          |          |          |    |   |          |          |          |          |          |    |    |          |          |          |          |          |    |   |          |          |          |          |          |  |   |   |   |   |    |   |   |          |          |  |  |   |   |          |          |          |  |   |   |          |          |          |          |    |   |          |          |          |          |          |    |    |          |          |          |          |          |    |   |          |          |          |          |          |  |    |    |  |  |  |    |   |          |          |  |  |
|                                                                                                                                              | 11                                                                                                                                                                                                                                                                                                                                                                                                                                                                                                                                                                                                                                                                                                                                                                                                                                                                                                                                                                                                                                                                                                                                                                                                                                                                                                                                                                                                                                                                                                                                                                                                                                                                                                                                                                                                                                                                                                                                                                                                                                                                                                                                                                                                                                                                                                                                                  | 12       |          |          |          |          |   |   |   |          |  |  |  |   |   |          |          |  |  |   |   |          |          |          |  |   |   |          |          |          |          |   |   |          |          |          |          |          |   |   |          |          |          |          |          |   |   |          |          |          |          |          |   |   |          |          |          |          |          |   |   |          |          |          |          |          |    |   |          |          |          |          |          |    |    |          |          |          |          |          |    |   |          |          |          |          |          |  |   |   |   |   |    |   |   |          |          |  |  |   |   |          |          |          |  |   |   |          |          |          |          |    |   |          |          |          |          |          |    |    |          |          |          |          |          |    |   |          |          |          |          |          |  |    |    |  |  |  |    |   |          |          |  |  |
| 12                                                                                                                                           | B                                                                                                                                                                                                                                                                                                                                                                                                                                                                                                                                                                                                                                                                                                                                                                                                                                                                                                                                                                                                                                                                                                                                                                                                                                                                                                                                                                                                                                                                                                                                                                                                                                                                                                                                                                                                                                                                                                                                                                                                                                                                                                                                                                                                                                                                                                                                                   | 2.064472 | 0.000000 |          |          |          |   |   |   |          |  |  |  |   |   |          |          |  |  |   |   |          |          |          |  |   |   |          |          |          |          |   |   |          |          |          |          |          |   |   |          |          |          |          |          |   |   |          |          |          |          |          |   |   |          |          |          |          |          |   |   |          |          |          |          |          |    |   |          |          |          |          |          |    |    |          |          |          |          |          |    |   |          |          |          |          |          |  |   |   |   |   |    |   |   |          |          |  |  |   |   |          |          |          |  |   |   |          |          |          |          |    |   |          |          |          |          |          |    |    |          |          |          |          |          |    |   |          |          |          |          |          |  |    |    |  |  |  |    |   |          |          |  |  |
|  <p>2. -2106.12909080 +3.6<br/>C<sub>1</sub> H/L 2.95</p> | <table border="1"> <thead> <tr> <th></th> <th>1</th> <th>2</th> <th>3</th> <th>4</th> <th>5</th> </tr> </thead> <tbody> <tr><td>1</td><td>B</td><td>0.000000</td><td></td><td></td><td></td></tr> <tr><td>2</td><td>B</td><td>2.848156</td><td>0.000000</td><td></td><td></td></tr> <tr><td>3</td><td>B</td><td>1.749813</td><td>1.750844</td><td>0.000000</td><td></td></tr> <tr><td>4</td><td>B</td><td>1.762640</td><td>1.758188</td><td>1.765706</td><td>0.000000</td></tr> <tr><td>5</td><td>B</td><td>3.399906</td><td>1.772903</td><td>2.858914</td><td>2.878103</td><td>0.000000</td></tr> <tr><td>6</td><td>C</td><td>2.765004</td><td>1.687003</td><td>1.697783</td><td>2.748769</td><td>1.691423</td></tr> <tr><td>7</td><td>B</td><td>2.899515</td><td>1.757212</td><td>2.861880</td><td>1.777790</td><td>1.786536</td></tr> <tr><td>8</td><td>B</td><td>1.870538</td><td>2.847827</td><td>1.756171</td><td>2.916986</td><td>2.873148</td></tr> <tr><td>9</td><td>B</td><td>1.857141</td><td>2.849962</td><td>2.892553</td><td>1.753972</td><td>2.897813</td></tr> <tr><td>10</td><td>B</td><td>3.035550</td><td>2.881699</td><td>3.459440</td><td>2.931144</td><td>1.764567</td></tr> <tr><td>11</td><td>Fe</td><td>3.344934</td><td>3.290517</td><td>3.298756</td><td>3.874685</td><td>2.066651</td></tr> <tr><td>12</td><td>P</td><td>1.967035</td><td>3.531224</td><td>3.041727</td><td>3.042466</td><td>2.993734</td></tr> <tr> <td></td> <td>6</td> <td>7</td> <td>8</td> <td>9</td> <td>10</td> </tr> <tr><td>7</td><td>B</td><td>2.749014</td><td>0.000000</td><td></td><td></td></tr> <tr><td>8</td><td>B</td><td>1.665306</td><td>3.432728</td><td>0.000000</td><td></td></tr> <tr><td>9</td><td>B</td><td>3.277834</td><td>1.755947</td><td>3.034280</td><td>0.000000</td></tr> <tr><td>10</td><td>B</td><td>2.824687</td><td>1.760690</td><td>3.069404</td><td>1.876916</td><td>0.000000</td></tr> <tr><td>11</td><td>Fe</td><td>2.040825</td><td>3.313294</td><td>2.095279</td><td>3.374374</td><td>2.158096</td></tr> <tr><td>12</td><td>P</td><td>2.909544</td><td>3.023642</td><td>2.000081</td><td>1.964566</td><td>1.972168</td></tr> <tr> <td></td> <td>11</td> <td>12</td> <td></td> <td></td> <td></td> </tr> <tr><td>12</td><td>P</td><td>2.117358</td><td>0.000000</td><td></td><td></td></tr> </tbody> </table> |          | 1        | 2        | 3        | 4        | 5 | 1 | B | 0.000000 |  |  |  | 2 | B | 2.848156 | 0.000000 |  |  | 3 | B | 1.749813 | 1.750844 | 0.000000 |  | 4 | B | 1.762640 | 1.758188 | 1.765706 | 0.000000 | 5 | B | 3.399906 | 1.772903 | 2.858914 | 2.878103 | 0.000000 | 6 | C | 2.765004 | 1.687003 | 1.697783 | 2.748769 | 1.691423 | 7 | B | 2.899515 | 1.757212 | 2.861880 | 1.777790 | 1.786536 | 8 | B | 1.870538 | 2.847827 | 1.756171 | 2.916986 | 2.873148 | 9 | B | 1.857141 | 2.849962 | 2.892553 | 1.753972 | 2.897813 | 10 | B | 3.035550 | 2.881699 | 3.459440 | 2.931144 | 1.764567 | 11 | Fe | 3.344934 | 3.290517 | 3.298756 | 3.874685 | 2.066651 | 12 | P | 1.967035 | 3.531224 | 3.041727 | 3.042466 | 2.993734 |  | 6 | 7 | 8 | 9 | 10 | 7 | B | 2.749014 | 0.000000 |  |  | 8 | B | 1.665306 | 3.432728 | 0.000000 |  | 9 | B | 3.277834 | 1.755947 | 3.034280 | 0.000000 | 10 | B | 2.824687 | 1.760690 | 3.069404 | 1.876916 | 0.000000 | 11 | Fe | 2.040825 | 3.313294 | 2.095279 | 3.374374 | 2.158096 | 12 | P | 2.909544 | 3.023642 | 2.000081 | 1.964566 | 1.972168 |  | 11 | 12 |  |  |  | 12 | P | 2.117358 | 0.000000 |  |  |
|                                                                                                                                              | 1                                                                                                                                                                                                                                                                                                                                                                                                                                                                                                                                                                                                                                                                                                                                                                                                                                                                                                                                                                                                                                                                                                                                                                                                                                                                                                                                                                                                                                                                                                                                                                                                                                                                                                                                                                                                                                                                                                                                                                                                                                                                                                                                                                                                                                                                                                                                                   | 2        | 3        | 4        | 5        |          |   |   |   |          |  |  |  |   |   |          |          |  |  |   |   |          |          |          |  |   |   |          |          |          |          |   |   |          |          |          |          |          |   |   |          |          |          |          |          |   |   |          |          |          |          |          |   |   |          |          |          |          |          |   |   |          |          |          |          |          |    |   |          |          |          |          |          |    |    |          |          |          |          |          |    |   |          |          |          |          |          |  |   |   |   |   |    |   |   |          |          |  |  |   |   |          |          |          |  |   |   |          |          |          |          |    |   |          |          |          |          |          |    |    |          |          |          |          |          |    |   |          |          |          |          |          |  |    |    |  |  |  |    |   |          |          |  |  |
| 1                                                                                                                                            | B                                                                                                                                                                                                                                                                                                                                                                                                                                                                                                                                                                                                                                                                                                                                                                                                                                                                                                                                                                                                                                                                                                                                                                                                                                                                                                                                                                                                                                                                                                                                                                                                                                                                                                                                                                                                                                                                                                                                                                                                                                                                                                                                                                                                                                                                                                                                                   | 0.000000 |          |          |          |          |   |   |   |          |  |  |  |   |   |          |          |  |  |   |   |          |          |          |  |   |   |          |          |          |          |   |   |          |          |          |          |          |   |   |          |          |          |          |          |   |   |          |          |          |          |          |   |   |          |          |          |          |          |   |   |          |          |          |          |          |    |   |          |          |          |          |          |    |    |          |          |          |          |          |    |   |          |          |          |          |          |  |   |   |   |   |    |   |   |          |          |  |  |   |   |          |          |          |  |   |   |          |          |          |          |    |   |          |          |          |          |          |    |    |          |          |          |          |          |    |   |          |          |          |          |          |  |    |    |  |  |  |    |   |          |          |  |  |
| 2                                                                                                                                            | B                                                                                                                                                                                                                                                                                                                                                                                                                                                                                                                                                                                                                                                                                                                                                                                                                                                                                                                                                                                                                                                                                                                                                                                                                                                                                                                                                                                                                                                                                                                                                                                                                                                                                                                                                                                                                                                                                                                                                                                                                                                                                                                                                                                                                                                                                                                                                   | 2.848156 | 0.000000 |          |          |          |   |   |   |          |  |  |  |   |   |          |          |  |  |   |   |          |          |          |  |   |   |          |          |          |          |   |   |          |          |          |          |          |   |   |          |          |          |          |          |   |   |          |          |          |          |          |   |   |          |          |          |          |          |   |   |          |          |          |          |          |    |   |          |          |          |          |          |    |    |          |          |          |          |          |    |   |          |          |          |          |          |  |   |   |   |   |    |   |   |          |          |  |  |   |   |          |          |          |  |   |   |          |          |          |          |    |   |          |          |          |          |          |    |    |          |          |          |          |          |    |   |          |          |          |          |          |  |    |    |  |  |  |    |   |          |          |  |  |
| 3                                                                                                                                            | B                                                                                                                                                                                                                                                                                                                                                                                                                                                                                                                                                                                                                                                                                                                                                                                                                                                                                                                                                                                                                                                                                                                                                                                                                                                                                                                                                                                                                                                                                                                                                                                                                                                                                                                                                                                                                                                                                                                                                                                                                                                                                                                                                                                                                                                                                                                                                   | 1.749813 | 1.750844 | 0.000000 |          |          |   |   |   |          |  |  |  |   |   |          |          |  |  |   |   |          |          |          |  |   |   |          |          |          |          |   |   |          |          |          |          |          |   |   |          |          |          |          |          |   |   |          |          |          |          |          |   |   |          |          |          |          |          |   |   |          |          |          |          |          |    |   |          |          |          |          |          |    |    |          |          |          |          |          |    |   |          |          |          |          |          |  |   |   |   |   |    |   |   |          |          |  |  |   |   |          |          |          |  |   |   |          |          |          |          |    |   |          |          |          |          |          |    |    |          |          |          |          |          |    |   |          |          |          |          |          |  |    |    |  |  |  |    |   |          |          |  |  |
| 4                                                                                                                                            | B                                                                                                                                                                                                                                                                                                                                                                                                                                                                                                                                                                                                                                                                                                                                                                                                                                                                                                                                                                                                                                                                                                                                                                                                                                                                                                                                                                                                                                                                                                                                                                                                                                                                                                                                                                                                                                                                                                                                                                                                                                                                                                                                                                                                                                                                                                                                                   | 1.762640 | 1.758188 | 1.765706 | 0.000000 |          |   |   |   |          |  |  |  |   |   |          |          |  |  |   |   |          |          |          |  |   |   |          |          |          |          |   |   |          |          |          |          |          |   |   |          |          |          |          |          |   |   |          |          |          |          |          |   |   |          |          |          |          |          |   |   |          |          |          |          |          |    |   |          |          |          |          |          |    |    |          |          |          |          |          |    |   |          |          |          |          |          |  |   |   |   |   |    |   |   |          |          |  |  |   |   |          |          |          |  |   |   |          |          |          |          |    |   |          |          |          |          |          |    |    |          |          |          |          |          |    |   |          |          |          |          |          |  |    |    |  |  |  |    |   |          |          |  |  |
| 5                                                                                                                                            | B                                                                                                                                                                                                                                                                                                                                                                                                                                                                                                                                                                                                                                                                                                                                                                                                                                                                                                                                                                                                                                                                                                                                                                                                                                                                                                                                                                                                                                                                                                                                                                                                                                                                                                                                                                                                                                                                                                                                                                                                                                                                                                                                                                                                                                                                                                                                                   | 3.399906 | 1.772903 | 2.858914 | 2.878103 | 0.000000 |   |   |   |          |  |  |  |   |   |          |          |  |  |   |   |          |          |          |  |   |   |          |          |          |          |   |   |          |          |          |          |          |   |   |          |          |          |          |          |   |   |          |          |          |          |          |   |   |          |          |          |          |          |   |   |          |          |          |          |          |    |   |          |          |          |          |          |    |    |          |          |          |          |          |    |   |          |          |          |          |          |  |   |   |   |   |    |   |   |          |          |  |  |   |   |          |          |          |  |   |   |          |          |          |          |    |   |          |          |          |          |          |    |    |          |          |          |          |          |    |   |          |          |          |          |          |  |    |    |  |  |  |    |   |          |          |  |  |
| 6                                                                                                                                            | C                                                                                                                                                                                                                                                                                                                                                                                                                                                                                                                                                                                                                                                                                                                                                                                                                                                                                                                                                                                                                                                                                                                                                                                                                                                                                                                                                                                                                                                                                                                                                                                                                                                                                                                                                                                                                                                                                                                                                                                                                                                                                                                                                                                                                                                                                                                                                   | 2.765004 | 1.687003 | 1.697783 | 2.748769 | 1.691423 |   |   |   |          |  |  |  |   |   |          |          |  |  |   |   |          |          |          |  |   |   |          |          |          |          |   |   |          |          |          |          |          |   |   |          |          |          |          |          |   |   |          |          |          |          |          |   |   |          |          |          |          |          |   |   |          |          |          |          |          |    |   |          |          |          |          |          |    |    |          |          |          |          |          |    |   |          |          |          |          |          |  |   |   |   |   |    |   |   |          |          |  |  |   |   |          |          |          |  |   |   |          |          |          |          |    |   |          |          |          |          |          |    |    |          |          |          |          |          |    |   |          |          |          |          |          |  |    |    |  |  |  |    |   |          |          |  |  |
| 7                                                                                                                                            | B                                                                                                                                                                                                                                                                                                                                                                                                                                                                                                                                                                                                                                                                                                                                                                                                                                                                                                                                                                                                                                                                                                                                                                                                                                                                                                                                                                                                                                                                                                                                                                                                                                                                                                                                                                                                                                                                                                                                                                                                                                                                                                                                                                                                                                                                                                                                                   | 2.899515 | 1.757212 | 2.861880 | 1.777790 | 1.786536 |   |   |   |          |  |  |  |   |   |          |          |  |  |   |   |          |          |          |  |   |   |          |          |          |          |   |   |          |          |          |          |          |   |   |          |          |          |          |          |   |   |          |          |          |          |          |   |   |          |          |          |          |          |   |   |          |          |          |          |          |    |   |          |          |          |          |          |    |    |          |          |          |          |          |    |   |          |          |          |          |          |  |   |   |   |   |    |   |   |          |          |  |  |   |   |          |          |          |  |   |   |          |          |          |          |    |   |          |          |          |          |          |    |    |          |          |          |          |          |    |   |          |          |          |          |          |  |    |    |  |  |  |    |   |          |          |  |  |
| 8                                                                                                                                            | B                                                                                                                                                                                                                                                                                                                                                                                                                                                                                                                                                                                                                                                                                                                                                                                                                                                                                                                                                                                                                                                                                                                                                                                                                                                                                                                                                                                                                                                                                                                                                                                                                                                                                                                                                                                                                                                                                                                                                                                                                                                                                                                                                                                                                                                                                                                                                   | 1.870538 | 2.847827 | 1.756171 | 2.916986 | 2.873148 |   |   |   |          |  |  |  |   |   |          |          |  |  |   |   |          |          |          |  |   |   |          |          |          |          |   |   |          |          |          |          |          |   |   |          |          |          |          |          |   |   |          |          |          |          |          |   |   |          |          |          |          |          |   |   |          |          |          |          |          |    |   |          |          |          |          |          |    |    |          |          |          |          |          |    |   |          |          |          |          |          |  |   |   |   |   |    |   |   |          |          |  |  |   |   |          |          |          |  |   |   |          |          |          |          |    |   |          |          |          |          |          |    |    |          |          |          |          |          |    |   |          |          |          |          |          |  |    |    |  |  |  |    |   |          |          |  |  |
| 9                                                                                                                                            | B                                                                                                                                                                                                                                                                                                                                                                                                                                                                                                                                                                                                                                                                                                                                                                                                                                                                                                                                                                                                                                                                                                                                                                                                                                                                                                                                                                                                                                                                                                                                                                                                                                                                                                                                                                                                                                                                                                                                                                                                                                                                                                                                                                                                                                                                                                                                                   | 1.857141 | 2.849962 | 2.892553 | 1.753972 | 2.897813 |   |   |   |          |  |  |  |   |   |          |          |  |  |   |   |          |          |          |  |   |   |          |          |          |          |   |   |          |          |          |          |          |   |   |          |          |          |          |          |   |   |          |          |          |          |          |   |   |          |          |          |          |          |   |   |          |          |          |          |          |    |   |          |          |          |          |          |    |    |          |          |          |          |          |    |   |          |          |          |          |          |  |   |   |   |   |    |   |   |          |          |  |  |   |   |          |          |          |  |   |   |          |          |          |          |    |   |          |          |          |          |          |    |    |          |          |          |          |          |    |   |          |          |          |          |          |  |    |    |  |  |  |    |   |          |          |  |  |
| 10                                                                                                                                           | B                                                                                                                                                                                                                                                                                                                                                                                                                                                                                                                                                                                                                                                                                                                                                                                                                                                                                                                                                                                                                                                                                                                                                                                                                                                                                                                                                                                                                                                                                                                                                                                                                                                                                                                                                                                                                                                                                                                                                                                                                                                                                                                                                                                                                                                                                                                                                   | 3.035550 | 2.881699 | 3.459440 | 2.931144 | 1.764567 |   |   |   |          |  |  |  |   |   |          |          |  |  |   |   |          |          |          |  |   |   |          |          |          |          |   |   |          |          |          |          |          |   |   |          |          |          |          |          |   |   |          |          |          |          |          |   |   |          |          |          |          |          |   |   |          |          |          |          |          |    |   |          |          |          |          |          |    |    |          |          |          |          |          |    |   |          |          |          |          |          |  |   |   |   |   |    |   |   |          |          |  |  |   |   |          |          |          |  |   |   |          |          |          |          |    |   |          |          |          |          |          |    |    |          |          |          |          |          |    |   |          |          |          |          |          |  |    |    |  |  |  |    |   |          |          |  |  |
| 11                                                                                                                                           | Fe                                                                                                                                                                                                                                                                                                                                                                                                                                                                                                                                                                                                                                                                                                                                                                                                                                                                                                                                                                                                                                                                                                                                                                                                                                                                                                                                                                                                                                                                                                                                                                                                                                                                                                                                                                                                                                                                                                                                                                                                                                                                                                                                                                                                                                                                                                                                                  | 3.344934 | 3.290517 | 3.298756 | 3.874685 | 2.066651 |   |   |   |          |  |  |  |   |   |          |          |  |  |   |   |          |          |          |  |   |   |          |          |          |          |   |   |          |          |          |          |          |   |   |          |          |          |          |          |   |   |          |          |          |          |          |   |   |          |          |          |          |          |   |   |          |          |          |          |          |    |   |          |          |          |          |          |    |    |          |          |          |          |          |    |   |          |          |          |          |          |  |   |   |   |   |    |   |   |          |          |  |  |   |   |          |          |          |  |   |   |          |          |          |          |    |   |          |          |          |          |          |    |    |          |          |          |          |          |    |   |          |          |          |          |          |  |    |    |  |  |  |    |   |          |          |  |  |
| 12                                                                                                                                           | P                                                                                                                                                                                                                                                                                                                                                                                                                                                                                                                                                                                                                                                                                                                                                                                                                                                                                                                                                                                                                                                                                                                                                                                                                                                                                                                                                                                                                                                                                                                                                                                                                                                                                                                                                                                                                                                                                                                                                                                                                                                                                                                                                                                                                                                                                                                                                   | 1.967035 | 3.531224 | 3.041727 | 3.042466 | 2.993734 |   |   |   |          |  |  |  |   |   |          |          |  |  |   |   |          |          |          |  |   |   |          |          |          |          |   |   |          |          |          |          |          |   |   |          |          |          |          |          |   |   |          |          |          |          |          |   |   |          |          |          |          |          |   |   |          |          |          |          |          |    |   |          |          |          |          |          |    |    |          |          |          |          |          |    |   |          |          |          |          |          |  |   |   |   |   |    |   |   |          |          |  |  |   |   |          |          |          |  |   |   |          |          |          |          |    |   |          |          |          |          |          |    |    |          |          |          |          |          |    |   |          |          |          |          |          |  |    |    |  |  |  |    |   |          |          |  |  |
|                                                                                                                                              | 6                                                                                                                                                                                                                                                                                                                                                                                                                                                                                                                                                                                                                                                                                                                                                                                                                                                                                                                                                                                                                                                                                                                                                                                                                                                                                                                                                                                                                                                                                                                                                                                                                                                                                                                                                                                                                                                                                                                                                                                                                                                                                                                                                                                                                                                                                                                                                   | 7        | 8        | 9        | 10       |          |   |   |   |          |  |  |  |   |   |          |          |  |  |   |   |          |          |          |  |   |   |          |          |          |          |   |   |          |          |          |          |          |   |   |          |          |          |          |          |   |   |          |          |          |          |          |   |   |          |          |          |          |          |   |   |          |          |          |          |          |    |   |          |          |          |          |          |    |    |          |          |          |          |          |    |   |          |          |          |          |          |  |   |   |   |   |    |   |   |          |          |  |  |   |   |          |          |          |  |   |   |          |          |          |          |    |   |          |          |          |          |          |    |    |          |          |          |          |          |    |   |          |          |          |          |          |  |    |    |  |  |  |    |   |          |          |  |  |
| 7                                                                                                                                            | B                                                                                                                                                                                                                                                                                                                                                                                                                                                                                                                                                                                                                                                                                                                                                                                                                                                                                                                                                                                                                                                                                                                                                                                                                                                                                                                                                                                                                                                                                                                                                                                                                                                                                                                                                                                                                                                                                                                                                                                                                                                                                                                                                                                                                                                                                                                                                   | 2.749014 | 0.000000 |          |          |          |   |   |   |          |  |  |  |   |   |          |          |  |  |   |   |          |          |          |  |   |   |          |          |          |          |   |   |          |          |          |          |          |   |   |          |          |          |          |          |   |   |          |          |          |          |          |   |   |          |          |          |          |          |   |   |          |          |          |          |          |    |   |          |          |          |          |          |    |    |          |          |          |          |          |    |   |          |          |          |          |          |  |   |   |   |   |    |   |   |          |          |  |  |   |   |          |          |          |  |   |   |          |          |          |          |    |   |          |          |          |          |          |    |    |          |          |          |          |          |    |   |          |          |          |          |          |  |    |    |  |  |  |    |   |          |          |  |  |
| 8                                                                                                                                            | B                                                                                                                                                                                                                                                                                                                                                                                                                                                                                                                                                                                                                                                                                                                                                                                                                                                                                                                                                                                                                                                                                                                                                                                                                                                                                                                                                                                                                                                                                                                                                                                                                                                                                                                                                                                                                                                                                                                                                                                                                                                                                                                                                                                                                                                                                                                                                   | 1.665306 | 3.432728 | 0.000000 |          |          |   |   |   |          |  |  |  |   |   |          |          |  |  |   |   |          |          |          |  |   |   |          |          |          |          |   |   |          |          |          |          |          |   |   |          |          |          |          |          |   |   |          |          |          |          |          |   |   |          |          |          |          |          |   |   |          |          |          |          |          |    |   |          |          |          |          |          |    |    |          |          |          |          |          |    |   |          |          |          |          |          |  |   |   |   |   |    |   |   |          |          |  |  |   |   |          |          |          |  |   |   |          |          |          |          |    |   |          |          |          |          |          |    |    |          |          |          |          |          |    |   |          |          |          |          |          |  |    |    |  |  |  |    |   |          |          |  |  |
| 9                                                                                                                                            | B                                                                                                                                                                                                                                                                                                                                                                                                                                                                                                                                                                                                                                                                                                                                                                                                                                                                                                                                                                                                                                                                                                                                                                                                                                                                                                                                                                                                                                                                                                                                                                                                                                                                                                                                                                                                                                                                                                                                                                                                                                                                                                                                                                                                                                                                                                                                                   | 3.277834 | 1.755947 | 3.034280 | 0.000000 |          |   |   |   |          |  |  |  |   |   |          |          |  |  |   |   |          |          |          |  |   |   |          |          |          |          |   |   |          |          |          |          |          |   |   |          |          |          |          |          |   |   |          |          |          |          |          |   |   |          |          |          |          |          |   |   |          |          |          |          |          |    |   |          |          |          |          |          |    |    |          |          |          |          |          |    |   |          |          |          |          |          |  |   |   |   |   |    |   |   |          |          |  |  |   |   |          |          |          |  |   |   |          |          |          |          |    |   |          |          |          |          |          |    |    |          |          |          |          |          |    |   |          |          |          |          |          |  |    |    |  |  |  |    |   |          |          |  |  |
| 10                                                                                                                                           | B                                                                                                                                                                                                                                                                                                                                                                                                                                                                                                                                                                                                                                                                                                                                                                                                                                                                                                                                                                                                                                                                                                                                                                                                                                                                                                                                                                                                                                                                                                                                                                                                                                                                                                                                                                                                                                                                                                                                                                                                                                                                                                                                                                                                                                                                                                                                                   | 2.824687 | 1.760690 | 3.069404 | 1.876916 | 0.000000 |   |   |   |          |  |  |  |   |   |          |          |  |  |   |   |          |          |          |  |   |   |          |          |          |          |   |   |          |          |          |          |          |   |   |          |          |          |          |          |   |   |          |          |          |          |          |   |   |          |          |          |          |          |   |   |          |          |          |          |          |    |   |          |          |          |          |          |    |    |          |          |          |          |          |    |   |          |          |          |          |          |  |   |   |   |   |    |   |   |          |          |  |  |   |   |          |          |          |  |   |   |          |          |          |          |    |   |          |          |          |          |          |    |    |          |          |          |          |          |    |   |          |          |          |          |          |  |    |    |  |  |  |    |   |          |          |  |  |
| 11                                                                                                                                           | Fe                                                                                                                                                                                                                                                                                                                                                                                                                                                                                                                                                                                                                                                                                                                                                                                                                                                                                                                                                                                                                                                                                                                                                                                                                                                                                                                                                                                                                                                                                                                                                                                                                                                                                                                                                                                                                                                                                                                                                                                                                                                                                                                                                                                                                                                                                                                                                  | 2.040825 | 3.313294 | 2.095279 | 3.374374 | 2.158096 |   |   |   |          |  |  |  |   |   |          |          |  |  |   |   |          |          |          |  |   |   |          |          |          |          |   |   |          |          |          |          |          |   |   |          |          |          |          |          |   |   |          |          |          |          |          |   |   |          |          |          |          |          |   |   |          |          |          |          |          |    |   |          |          |          |          |          |    |    |          |          |          |          |          |    |   |          |          |          |          |          |  |   |   |   |   |    |   |   |          |          |  |  |   |   |          |          |          |  |   |   |          |          |          |          |    |   |          |          |          |          |          |    |    |          |          |          |          |          |    |   |          |          |          |          |          |  |    |    |  |  |  |    |   |          |          |  |  |
| 12                                                                                                                                           | P                                                                                                                                                                                                                                                                                                                                                                                                                                                                                                                                                                                                                                                                                                                                                                                                                                                                                                                                                                                                                                                                                                                                                                                                                                                                                                                                                                                                                                                                                                                                                                                                                                                                                                                                                                                                                                                                                                                                                                                                                                                                                                                                                                                                                                                                                                                                                   | 2.909544 | 3.023642 | 2.000081 | 1.964566 | 1.972168 |   |   |   |          |  |  |  |   |   |          |          |  |  |   |   |          |          |          |  |   |   |          |          |          |          |   |   |          |          |          |          |          |   |   |          |          |          |          |          |   |   |          |          |          |          |          |   |   |          |          |          |          |          |   |   |          |          |          |          |          |    |   |          |          |          |          |          |    |    |          |          |          |          |          |    |   |          |          |          |          |          |  |   |   |   |   |    |   |   |          |          |  |  |   |   |          |          |          |  |   |   |          |          |          |          |    |   |          |          |          |          |          |    |    |          |          |          |          |          |    |   |          |          |          |          |          |  |    |    |  |  |  |    |   |          |          |  |  |
|                                                                                                                                              | 11                                                                                                                                                                                                                                                                                                                                                                                                                                                                                                                                                                                                                                                                                                                                                                                                                                                                                                                                                                                                                                                                                                                                                                                                                                                                                                                                                                                                                                                                                                                                                                                                                                                                                                                                                                                                                                                                                                                                                                                                                                                                                                                                                                                                                                                                                                                                                  | 12       |          |          |          |          |   |   |   |          |  |  |  |   |   |          |          |  |  |   |   |          |          |          |  |   |   |          |          |          |          |   |   |          |          |          |          |          |   |   |          |          |          |          |          |   |   |          |          |          |          |          |   |   |          |          |          |          |          |   |   |          |          |          |          |          |    |   |          |          |          |          |          |    |    |          |          |          |          |          |    |   |          |          |          |          |          |  |   |   |   |   |    |   |   |          |          |  |  |   |   |          |          |          |  |   |   |          |          |          |          |    |   |          |          |          |          |          |    |    |          |          |          |          |          |    |   |          |          |          |          |          |  |    |    |  |  |  |    |   |          |          |  |  |
| 12                                                                                                                                           | P                                                                                                                                                                                                                                                                                                                                                                                                                                                                                                                                                                                                                                                                                                                                                                                                                                                                                                                                                                                                                                                                                                                                                                                                                                                                                                                                                                                                                                                                                                                                                                                                                                                                                                                                                                                                                                                                                                                                                                                                                                                                                                                                                                                                                                                                                                                                                   | 2.117358 | 0.000000 |          |          |          |   |   |   |          |  |  |  |   |   |          |          |  |  |   |   |          |          |          |  |   |   |          |          |          |          |   |   |          |          |          |          |          |   |   |          |          |          |          |          |   |   |          |          |          |          |          |   |   |          |          |          |          |          |   |   |          |          |          |          |          |    |   |          |          |          |          |          |    |    |          |          |          |          |          |    |   |          |          |          |          |          |  |   |   |   |   |    |   |   |          |          |  |  |   |   |          |          |          |  |   |   |          |          |          |          |    |   |          |          |          |          |          |    |    |          |          |          |          |          |    |   |          |          |          |          |          |  |    |    |  |  |  |    |   |          |          |  |  |

| 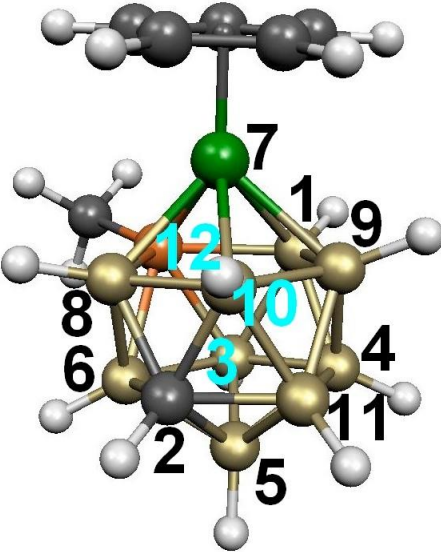 <p>3. -2106.12494590 +6.2<br/>C<sub>1</sub> H/L 3.04</p>   | <table border="1"> <thead> <tr> <th></th> <th>1</th> <th>2</th> <th>3</th> <th>4</th> <th>5</th> </tr> </thead> <tbody> <tr><td>1 B</td><td>0.000000</td><td></td><td></td><td></td><td></td></tr> <tr><td>2 C</td><td>3.292870</td><td>0.000000</td><td></td><td></td><td></td></tr> <tr><td>3 B</td><td>1.881684</td><td>2.759542</td><td>0.000000</td><td></td><td></td></tr> <tr><td>4 B</td><td>1.757891</td><td>2.739750</td><td>1.758002</td><td>0.000000</td><td></td></tr> <tr><td>5 B</td><td>2.912453</td><td>1.696709</td><td>1.750275</td><td>1.758707</td><td>0.000000</td></tr> <tr><td>6 B</td><td>3.027164</td><td>1.663750</td><td>1.840881</td><td>2.885137</td><td>1.751706</td></tr> <tr><td>7 Fe</td><td>2.152663</td><td>3.158521</td><td>3.364720</td><td>3.321980</td><td>3.857828</td></tr> <tr><td>8 B</td><td>3.078295</td><td>1.677314</td><td>3.033495</td><td>3.452264</td><td>2.919242</td></tr> <tr><td>9 B</td><td>1.762573</td><td>2.750894</td><td>2.917020</td><td>1.798055</td><td>2.876459</td></tr> <tr><td>10 B</td><td>2.922785</td><td>1.717541</td><td>3.427657</td><td>2.880781</td><td>2.879039</td></tr> <tr><td>11 B</td><td>2.867092</td><td>1.686460</td><td>2.857099</td><td>1.765176</td><td>1.755475</td></tr> <tr><td>12 P</td><td>1.982688</td><td>2.900208</td><td>1.972803</td><td>3.034701</td><td>3.044916</td></tr> <tr> <th></th> <th>6</th> <th>7</th> <th>8</th> <th>9</th> <th>10</th> </tr> <tr><td>6 B</td><td>0.000000</td><td></td><td></td><td></td><td></td></tr> <tr><td>7 Fe</td><td>3.333253</td><td>0.000000</td><td></td><td></td><td></td></tr> <tr><td>8 B</td><td>1.868680</td><td>2.099600</td><td>0.000000</td><td></td><td></td></tr> <tr><td>9 B</td><td>3.416665</td><td>2.096829</td><td>2.924055</td><td>0.000000</td><td></td></tr> <tr><td>10 B</td><td>2.898893</td><td>2.064723</td><td>1.760656</td><td>1.768220</td><td>0.000000</td></tr> <tr><td>11 B</td><td>2.840593</td><td>3.283463</td><td>2.861606</td><td>1.769964</td><td>1.764666</td></tr> <tr><td>12 P</td><td>1.974621</td><td>2.092825</td><td>1.989661</td><td>3.019668</td><td>3.020275</td></tr> <tr> <th></th> <th>11</th> <th>12</th> <th colspan="3"></th> </tr> <tr><td>11 B</td><td>0.000000</td><td></td><td></td><td></td><td></td></tr> <tr><td>12 P</td><td>3.531869</td><td>0.000000</td><td></td><td></td><td></td></tr> </tbody> </table> |          | 1        | 2        | 3        | 4 | 5 | 1 B | 0.000000 |  |  |  |  | 2 C | 3.292870 | 0.000000 |  |  |  | 3 B | 1.881684 | 2.759542 | 0.000000 |  |  | 4 B | 1.757891 | 2.739750 | 1.758002 | 0.000000 |  | 5 B | 2.912453 | 1.696709 | 1.750275 | 1.758707 | 0.000000 | 6 B | 3.027164 | 1.663750 | 1.840881 | 2.885137 | 1.751706 | 7 Fe | 2.152663 | 3.158521 | 3.364720 | 3.321980 | 3.857828 | 8 B  | 3.078295 | 1.677314 | 3.033495 | 3.452264 | 2.919242 | 9 B | 1.762573 | 2.750894 | 2.917020 | 1.798055 | 2.876459 | 10 B | 2.922785 | 1.717541 | 3.427657 | 2.880781 | 2.879039 | 11 B | 2.867092 | 1.686460 | 2.857099 | 1.765176 | 1.755475 | 12 P | 1.982688 | 2.900208 | 1.972803 | 3.034701 | 3.044916 |  | 6 | 7 | 8 | 9 | 10 | 6 B | 0.000000 |  |  |  |  | 7 Fe | 3.333253 | 0.000000 |  |  |  | 8 B  | 1.868680 | 2.099600 | 0.000000 |  |  | 9 B | 3.416665 | 2.096829 | 2.924055 | 0.000000 |  | 10 B | 2.898893 | 2.064723 | 1.760656 | 1.768220 | 0.000000 | 11 B | 2.840593 | 3.283463 | 2.861606 | 1.769964 | 1.764666 | 12 P | 1.974621 | 2.092825 | 1.989661 | 3.019668 | 3.020275 |  | 11 | 12 |  |  |  | 11 B | 0.000000 |          |  |  |  | 12 P | 3.531869 | 0.000000 |  |  |  |
|----------------------------------------------------------------------------------------------------------------------------------------------|--------------------------------------------------------------------------------------------------------------------------------------------------------------------------------------------------------------------------------------------------------------------------------------------------------------------------------------------------------------------------------------------------------------------------------------------------------------------------------------------------------------------------------------------------------------------------------------------------------------------------------------------------------------------------------------------------------------------------------------------------------------------------------------------------------------------------------------------------------------------------------------------------------------------------------------------------------------------------------------------------------------------------------------------------------------------------------------------------------------------------------------------------------------------------------------------------------------------------------------------------------------------------------------------------------------------------------------------------------------------------------------------------------------------------------------------------------------------------------------------------------------------------------------------------------------------------------------------------------------------------------------------------------------------------------------------------------------------------------------------------------------------------------------------------------------------------------------------------------------------------------------------------------------------------------------------------------------------------------------------------------------------------------------------------------------------------------------------------------------------------------------------------------------------------------------------------------------------------------------------------------------------------------------------------------------------------------------------------------------------------------------------------------------------|----------|----------|----------|----------|---|---|-----|----------|--|--|--|--|-----|----------|----------|--|--|--|-----|----------|----------|----------|--|--|-----|----------|----------|----------|----------|--|-----|----------|----------|----------|----------|----------|-----|----------|----------|----------|----------|----------|------|----------|----------|----------|----------|----------|------|----------|----------|----------|----------|----------|-----|----------|----------|----------|----------|----------|------|----------|----------|----------|----------|----------|------|----------|----------|----------|----------|----------|------|----------|----------|----------|----------|----------|--|---|---|---|---|----|-----|----------|--|--|--|--|------|----------|----------|--|--|--|------|----------|----------|----------|--|--|-----|----------|----------|----------|----------|--|------|----------|----------|----------|----------|----------|------|----------|----------|----------|----------|----------|------|----------|----------|----------|----------|----------|--|----|----|--|--|--|------|----------|----------|--|--|--|------|----------|----------|--|--|--|
|                                                                                                                                              | 1                                                                                                                                                                                                                                                                                                                                                                                                                                                                                                                                                                                                                                                                                                                                                                                                                                                                                                                                                                                                                                                                                                                                                                                                                                                                                                                                                                                                                                                                                                                                                                                                                                                                                                                                                                                                                                                                                                                                                                                                                                                                                                                                                                                                                                                                                                                                                                                                                  | 2        | 3        | 4        | 5        |   |   |     |          |  |  |  |  |     |          |          |  |  |  |     |          |          |          |  |  |     |          |          |          |          |  |     |          |          |          |          |          |     |          |          |          |          |          |      |          |          |          |          |          |      |          |          |          |          |          |     |          |          |          |          |          |      |          |          |          |          |          |      |          |          |          |          |          |      |          |          |          |          |          |  |   |   |   |   |    |     |          |  |  |  |  |      |          |          |  |  |  |      |          |          |          |  |  |     |          |          |          |          |  |      |          |          |          |          |          |      |          |          |          |          |          |      |          |          |          |          |          |  |    |    |  |  |  |      |          |          |  |  |  |      |          |          |  |  |  |
| 1 B                                                                                                                                          | 0.000000                                                                                                                                                                                                                                                                                                                                                                                                                                                                                                                                                                                                                                                                                                                                                                                                                                                                                                                                                                                                                                                                                                                                                                                                                                                                                                                                                                                                                                                                                                                                                                                                                                                                                                                                                                                                                                                                                                                                                                                                                                                                                                                                                                                                                                                                                                                                                                                                           |          |          |          |          |   |   |     |          |  |  |  |  |     |          |          |  |  |  |     |          |          |          |  |  |     |          |          |          |          |  |     |          |          |          |          |          |     |          |          |          |          |          |      |          |          |          |          |          |      |          |          |          |          |          |     |          |          |          |          |          |      |          |          |          |          |          |      |          |          |          |          |          |      |          |          |          |          |          |  |   |   |   |   |    |     |          |  |  |  |  |      |          |          |  |  |  |      |          |          |          |  |  |     |          |          |          |          |  |      |          |          |          |          |          |      |          |          |          |          |          |      |          |          |          |          |          |  |    |    |  |  |  |      |          |          |  |  |  |      |          |          |  |  |  |
| 2 C                                                                                                                                          | 3.292870                                                                                                                                                                                                                                                                                                                                                                                                                                                                                                                                                                                                                                                                                                                                                                                                                                                                                                                                                                                                                                                                                                                                                                                                                                                                                                                                                                                                                                                                                                                                                                                                                                                                                                                                                                                                                                                                                                                                                                                                                                                                                                                                                                                                                                                                                                                                                                                                           | 0.000000 |          |          |          |   |   |     |          |  |  |  |  |     |          |          |  |  |  |     |          |          |          |  |  |     |          |          |          |          |  |     |          |          |          |          |          |     |          |          |          |          |          |      |          |          |          |          |          |      |          |          |          |          |          |     |          |          |          |          |          |      |          |          |          |          |          |      |          |          |          |          |          |      |          |          |          |          |          |  |   |   |   |   |    |     |          |  |  |  |  |      |          |          |  |  |  |      |          |          |          |  |  |     |          |          |          |          |  |      |          |          |          |          |          |      |          |          |          |          |          |      |          |          |          |          |          |  |    |    |  |  |  |      |          |          |  |  |  |      |          |          |  |  |  |
| 3 B                                                                                                                                          | 1.881684                                                                                                                                                                                                                                                                                                                                                                                                                                                                                                                                                                                                                                                                                                                                                                                                                                                                                                                                                                                                                                                                                                                                                                                                                                                                                                                                                                                                                                                                                                                                                                                                                                                                                                                                                                                                                                                                                                                                                                                                                                                                                                                                                                                                                                                                                                                                                                                                           | 2.759542 | 0.000000 |          |          |   |   |     |          |  |  |  |  |     |          |          |  |  |  |     |          |          |          |  |  |     |          |          |          |          |  |     |          |          |          |          |          |     |          |          |          |          |          |      |          |          |          |          |          |      |          |          |          |          |          |     |          |          |          |          |          |      |          |          |          |          |          |      |          |          |          |          |          |      |          |          |          |          |          |  |   |   |   |   |    |     |          |  |  |  |  |      |          |          |  |  |  |      |          |          |          |  |  |     |          |          |          |          |  |      |          |          |          |          |          |      |          |          |          |          |          |      |          |          |          |          |          |  |    |    |  |  |  |      |          |          |  |  |  |      |          |          |  |  |  |
| 4 B                                                                                                                                          | 1.757891                                                                                                                                                                                                                                                                                                                                                                                                                                                                                                                                                                                                                                                                                                                                                                                                                                                                                                                                                                                                                                                                                                                                                                                                                                                                                                                                                                                                                                                                                                                                                                                                                                                                                                                                                                                                                                                                                                                                                                                                                                                                                                                                                                                                                                                                                                                                                                                                           | 2.739750 | 1.758002 | 0.000000 |          |   |   |     |          |  |  |  |  |     |          |          |  |  |  |     |          |          |          |  |  |     |          |          |          |          |  |     |          |          |          |          |          |     |          |          |          |          |          |      |          |          |          |          |          |      |          |          |          |          |          |     |          |          |          |          |          |      |          |          |          |          |          |      |          |          |          |          |          |      |          |          |          |          |          |  |   |   |   |   |    |     |          |  |  |  |  |      |          |          |  |  |  |      |          |          |          |  |  |     |          |          |          |          |  |      |          |          |          |          |          |      |          |          |          |          |          |      |          |          |          |          |          |  |    |    |  |  |  |      |          |          |  |  |  |      |          |          |  |  |  |
| 5 B                                                                                                                                          | 2.912453                                                                                                                                                                                                                                                                                                                                                                                                                                                                                                                                                                                                                                                                                                                                                                                                                                                                                                                                                                                                                                                                                                                                                                                                                                                                                                                                                                                                                                                                                                                                                                                                                                                                                                                                                                                                                                                                                                                                                                                                                                                                                                                                                                                                                                                                                                                                                                                                           | 1.696709 | 1.750275 | 1.758707 | 0.000000 |   |   |     |          |  |  |  |  |     |          |          |  |  |  |     |          |          |          |  |  |     |          |          |          |          |  |     |          |          |          |          |          |     |          |          |          |          |          |      |          |          |          |          |          |      |          |          |          |          |          |     |          |          |          |          |          |      |          |          |          |          |          |      |          |          |          |          |          |      |          |          |          |          |          |  |   |   |   |   |    |     |          |  |  |  |  |      |          |          |  |  |  |      |          |          |          |  |  |     |          |          |          |          |  |      |          |          |          |          |          |      |          |          |          |          |          |      |          |          |          |          |          |  |    |    |  |  |  |      |          |          |  |  |  |      |          |          |  |  |  |
| 6 B                                                                                                                                          | 3.027164                                                                                                                                                                                                                                                                                                                                                                                                                                                                                                                                                                                                                                                                                                                                                                                                                                                                                                                                                                                                                                                                                                                                                                                                                                                                                                                                                                                                                                                                                                                                                                                                                                                                                                                                                                                                                                                                                                                                                                                                                                                                                                                                                                                                                                                                                                                                                                                                           | 1.663750 | 1.840881 | 2.885137 | 1.751706 |   |   |     |          |  |  |  |  |     |          |          |  |  |  |     |          |          |          |  |  |     |          |          |          |          |  |     |          |          |          |          |          |     |          |          |          |          |          |      |          |          |          |          |          |      |          |          |          |          |          |     |          |          |          |          |          |      |          |          |          |          |          |      |          |          |          |          |          |      |          |          |          |          |          |  |   |   |   |   |    |     |          |  |  |  |  |      |          |          |  |  |  |      |          |          |          |  |  |     |          |          |          |          |  |      |          |          |          |          |          |      |          |          |          |          |          |      |          |          |          |          |          |  |    |    |  |  |  |      |          |          |  |  |  |      |          |          |  |  |  |
| 7 Fe                                                                                                                                         | 2.152663                                                                                                                                                                                                                                                                                                                                                                                                                                                                                                                                                                                                                                                                                                                                                                                                                                                                                                                                                                                                                                                                                                                                                                                                                                                                                                                                                                                                                                                                                                                                                                                                                                                                                                                                                                                                                                                                                                                                                                                                                                                                                                                                                                                                                                                                                                                                                                                                           | 3.158521 | 3.364720 | 3.321980 | 3.857828 |   |   |     |          |  |  |  |  |     |          |          |  |  |  |     |          |          |          |  |  |     |          |          |          |          |  |     |          |          |          |          |          |     |          |          |          |          |          |      |          |          |          |          |          |      |          |          |          |          |          |     |          |          |          |          |          |      |          |          |          |          |          |      |          |          |          |          |          |      |          |          |          |          |          |  |   |   |   |   |    |     |          |  |  |  |  |      |          |          |  |  |  |      |          |          |          |  |  |     |          |          |          |          |  |      |          |          |          |          |          |      |          |          |          |          |          |      |          |          |          |          |          |  |    |    |  |  |  |      |          |          |  |  |  |      |          |          |  |  |  |
| 8 B                                                                                                                                          | 3.078295                                                                                                                                                                                                                                                                                                                                                                                                                                                                                                                                                                                                                                                                                                                                                                                                                                                                                                                                                                                                                                                                                                                                                                                                                                                                                                                                                                                                                                                                                                                                                                                                                                                                                                                                                                                                                                                                                                                                                                                                                                                                                                                                                                                                                                                                                                                                                                                                           | 1.677314 | 3.033495 | 3.452264 | 2.919242 |   |   |     |          |  |  |  |  |     |          |          |  |  |  |     |          |          |          |  |  |     |          |          |          |          |  |     |          |          |          |          |          |     |          |          |          |          |          |      |          |          |          |          |          |      |          |          |          |          |          |     |          |          |          |          |          |      |          |          |          |          |          |      |          |          |          |          |          |      |          |          |          |          |          |  |   |   |   |   |    |     |          |  |  |  |  |      |          |          |  |  |  |      |          |          |          |  |  |     |          |          |          |          |  |      |          |          |          |          |          |      |          |          |          |          |          |      |          |          |          |          |          |  |    |    |  |  |  |      |          |          |  |  |  |      |          |          |  |  |  |
| 9 B                                                                                                                                          | 1.762573                                                                                                                                                                                                                                                                                                                                                                                                                                                                                                                                                                                                                                                                                                                                                                                                                                                                                                                                                                                                                                                                                                                                                                                                                                                                                                                                                                                                                                                                                                                                                                                                                                                                                                                                                                                                                                                                                                                                                                                                                                                                                                                                                                                                                                                                                                                                                                                                           | 2.750894 | 2.917020 | 1.798055 | 2.876459 |   |   |     |          |  |  |  |  |     |          |          |  |  |  |     |          |          |          |  |  |     |          |          |          |          |  |     |          |          |          |          |          |     |          |          |          |          |          |      |          |          |          |          |          |      |          |          |          |          |          |     |          |          |          |          |          |      |          |          |          |          |          |      |          |          |          |          |          |      |          |          |          |          |          |  |   |   |   |   |    |     |          |  |  |  |  |      |          |          |  |  |  |      |          |          |          |  |  |     |          |          |          |          |  |      |          |          |          |          |          |      |          |          |          |          |          |      |          |          |          |          |          |  |    |    |  |  |  |      |          |          |  |  |  |      |          |          |  |  |  |
| 10 B                                                                                                                                         | 2.922785                                                                                                                                                                                                                                                                                                                                                                                                                                                                                                                                                                                                                                                                                                                                                                                                                                                                                                                                                                                                                                                                                                                                                                                                                                                                                                                                                                                                                                                                                                                                                                                                                                                                                                                                                                                                                                                                                                                                                                                                                                                                                                                                                                                                                                                                                                                                                                                                           | 1.717541 | 3.427657 | 2.880781 | 2.879039 |   |   |     |          |  |  |  |  |     |          |          |  |  |  |     |          |          |          |  |  |     |          |          |          |          |  |     |          |          |          |          |          |     |          |          |          |          |          |      |          |          |          |          |          |      |          |          |          |          |          |     |          |          |          |          |          |      |          |          |          |          |          |      |          |          |          |          |          |      |          |          |          |          |          |  |   |   |   |   |    |     |          |  |  |  |  |      |          |          |  |  |  |      |          |          |          |  |  |     |          |          |          |          |  |      |          |          |          |          |          |      |          |          |          |          |          |      |          |          |          |          |          |  |    |    |  |  |  |      |          |          |  |  |  |      |          |          |  |  |  |
| 11 B                                                                                                                                         | 2.867092                                                                                                                                                                                                                                                                                                                                                                                                                                                                                                                                                                                                                                                                                                                                                                                                                                                                                                                                                                                                                                                                                                                                                                                                                                                                                                                                                                                                                                                                                                                                                                                                                                                                                                                                                                                                                                                                                                                                                                                                                                                                                                                                                                                                                                                                                                                                                                                                           | 1.686460 | 2.857099 | 1.765176 | 1.755475 |   |   |     |          |  |  |  |  |     |          |          |  |  |  |     |          |          |          |  |  |     |          |          |          |          |  |     |          |          |          |          |          |     |          |          |          |          |          |      |          |          |          |          |          |      |          |          |          |          |          |     |          |          |          |          |          |      |          |          |          |          |          |      |          |          |          |          |          |      |          |          |          |          |          |  |   |   |   |   |    |     |          |  |  |  |  |      |          |          |  |  |  |      |          |          |          |  |  |     |          |          |          |          |  |      |          |          |          |          |          |      |          |          |          |          |          |      |          |          |          |          |          |  |    |    |  |  |  |      |          |          |  |  |  |      |          |          |  |  |  |
| 12 P                                                                                                                                         | 1.982688                                                                                                                                                                                                                                                                                                                                                                                                                                                                                                                                                                                                                                                                                                                                                                                                                                                                                                                                                                                                                                                                                                                                                                                                                                                                                                                                                                                                                                                                                                                                                                                                                                                                                                                                                                                                                                                                                                                                                                                                                                                                                                                                                                                                                                                                                                                                                                                                           | 2.900208 | 1.972803 | 3.034701 | 3.044916 |   |   |     |          |  |  |  |  |     |          |          |  |  |  |     |          |          |          |  |  |     |          |          |          |          |  |     |          |          |          |          |          |     |          |          |          |          |          |      |          |          |          |          |          |      |          |          |          |          |          |     |          |          |          |          |          |      |          |          |          |          |          |      |          |          |          |          |          |      |          |          |          |          |          |  |   |   |   |   |    |     |          |  |  |  |  |      |          |          |  |  |  |      |          |          |          |  |  |     |          |          |          |          |  |      |          |          |          |          |          |      |          |          |          |          |          |      |          |          |          |          |          |  |    |    |  |  |  |      |          |          |  |  |  |      |          |          |  |  |  |
|                                                                                                                                              | 6                                                                                                                                                                                                                                                                                                                                                                                                                                                                                                                                                                                                                                                                                                                                                                                                                                                                                                                                                                                                                                                                                                                                                                                                                                                                                                                                                                                                                                                                                                                                                                                                                                                                                                                                                                                                                                                                                                                                                                                                                                                                                                                                                                                                                                                                                                                                                                                                                  | 7        | 8        | 9        | 10       |   |   |     |          |  |  |  |  |     |          |          |  |  |  |     |          |          |          |  |  |     |          |          |          |          |  |     |          |          |          |          |          |     |          |          |          |          |          |      |          |          |          |          |          |      |          |          |          |          |          |     |          |          |          |          |          |      |          |          |          |          |          |      |          |          |          |          |          |      |          |          |          |          |          |  |   |   |   |   |    |     |          |  |  |  |  |      |          |          |  |  |  |      |          |          |          |  |  |     |          |          |          |          |  |      |          |          |          |          |          |      |          |          |          |          |          |      |          |          |          |          |          |  |    |    |  |  |  |      |          |          |  |  |  |      |          |          |  |  |  |
| 6 B                                                                                                                                          | 0.000000                                                                                                                                                                                                                                                                                                                                                                                                                                                                                                                                                                                                                                                                                                                                                                                                                                                                                                                                                                                                                                                                                                                                                                                                                                                                                                                                                                                                                                                                                                                                                                                                                                                                                                                                                                                                                                                                                                                                                                                                                                                                                                                                                                                                                                                                                                                                                                                                           |          |          |          |          |   |   |     |          |  |  |  |  |     |          |          |  |  |  |     |          |          |          |  |  |     |          |          |          |          |  |     |          |          |          |          |          |     |          |          |          |          |          |      |          |          |          |          |          |      |          |          |          |          |          |     |          |          |          |          |          |      |          |          |          |          |          |      |          |          |          |          |          |      |          |          |          |          |          |  |   |   |   |   |    |     |          |  |  |  |  |      |          |          |  |  |  |      |          |          |          |  |  |     |          |          |          |          |  |      |          |          |          |          |          |      |          |          |          |          |          |      |          |          |          |          |          |  |    |    |  |  |  |      |          |          |  |  |  |      |          |          |  |  |  |
| 7 Fe                                                                                                                                         | 3.333253                                                                                                                                                                                                                                                                                                                                                                                                                                                                                                                                                                                                                                                                                                                                                                                                                                                                                                                                                                                                                                                                                                                                                                                                                                                                                                                                                                                                                                                                                                                                                                                                                                                                                                                                                                                                                                                                                                                                                                                                                                                                                                                                                                                                                                                                                                                                                                                                           | 0.000000 |          |          |          |   |   |     |          |  |  |  |  |     |          |          |  |  |  |     |          |          |          |  |  |     |          |          |          |          |  |     |          |          |          |          |          |     |          |          |          |          |          |      |          |          |          |          |          |      |          |          |          |          |          |     |          |          |          |          |          |      |          |          |          |          |          |      |          |          |          |          |          |      |          |          |          |          |          |  |   |   |   |   |    |     |          |  |  |  |  |      |          |          |  |  |  |      |          |          |          |  |  |     |          |          |          |          |  |      |          |          |          |          |          |      |          |          |          |          |          |      |          |          |          |          |          |  |    |    |  |  |  |      |          |          |  |  |  |      |          |          |  |  |  |
| 8 B                                                                                                                                          | 1.868680                                                                                                                                                                                                                                                                                                                                                                                                                                                                                                                                                                                                                                                                                                                                                                                                                                                                                                                                                                                                                                                                                                                                                                                                                                                                                                                                                                                                                                                                                                                                                                                                                                                                                                                                                                                                                                                                                                                                                                                                                                                                                                                                                                                                                                                                                                                                                                                                           | 2.099600 | 0.000000 |          |          |   |   |     |          |  |  |  |  |     |          |          |  |  |  |     |          |          |          |  |  |     |          |          |          |          |  |     |          |          |          |          |          |     |          |          |          |          |          |      |          |          |          |          |          |      |          |          |          |          |          |     |          |          |          |          |          |      |          |          |          |          |          |      |          |          |          |          |          |      |          |          |          |          |          |  |   |   |   |   |    |     |          |  |  |  |  |      |          |          |  |  |  |      |          |          |          |  |  |     |          |          |          |          |  |      |          |          |          |          |          |      |          |          |          |          |          |      |          |          |          |          |          |  |    |    |  |  |  |      |          |          |  |  |  |      |          |          |  |  |  |
| 9 B                                                                                                                                          | 3.416665                                                                                                                                                                                                                                                                                                                                                                                                                                                                                                                                                                                                                                                                                                                                                                                                                                                                                                                                                                                                                                                                                                                                                                                                                                                                                                                                                                                                                                                                                                                                                                                                                                                                                                                                                                                                                                                                                                                                                                                                                                                                                                                                                                                                                                                                                                                                                                                                           | 2.096829 | 2.924055 | 0.000000 |          |   |   |     |          |  |  |  |  |     |          |          |  |  |  |     |          |          |          |  |  |     |          |          |          |          |  |     |          |          |          |          |          |     |          |          |          |          |          |      |          |          |          |          |          |      |          |          |          |          |          |     |          |          |          |          |          |      |          |          |          |          |          |      |          |          |          |          |          |      |          |          |          |          |          |  |   |   |   |   |    |     |          |  |  |  |  |      |          |          |  |  |  |      |          |          |          |  |  |     |          |          |          |          |  |      |          |          |          |          |          |      |          |          |          |          |          |      |          |          |          |          |          |  |    |    |  |  |  |      |          |          |  |  |  |      |          |          |  |  |  |
| 10 B                                                                                                                                         | 2.898893                                                                                                                                                                                                                                                                                                                                                                                                                                                                                                                                                                                                                                                                                                                                                                                                                                                                                                                                                                                                                                                                                                                                                                                                                                                                                                                                                                                                                                                                                                                                                                                                                                                                                                                                                                                                                                                                                                                                                                                                                                                                                                                                                                                                                                                                                                                                                                                                           | 2.064723 | 1.760656 | 1.768220 | 0.000000 |   |   |     |          |  |  |  |  |     |          |          |  |  |  |     |          |          |          |  |  |     |          |          |          |          |  |     |          |          |          |          |          |     |          |          |          |          |          |      |          |          |          |          |          |      |          |          |          |          |          |     |          |          |          |          |          |      |          |          |          |          |          |      |          |          |          |          |          |      |          |          |          |          |          |  |   |   |   |   |    |     |          |  |  |  |  |      |          |          |  |  |  |      |          |          |          |  |  |     |          |          |          |          |  |      |          |          |          |          |          |      |          |          |          |          |          |      |          |          |          |          |          |  |    |    |  |  |  |      |          |          |  |  |  |      |          |          |  |  |  |
| 11 B                                                                                                                                         | 2.840593                                                                                                                                                                                                                                                                                                                                                                                                                                                                                                                                                                                                                                                                                                                                                                                                                                                                                                                                                                                                                                                                                                                                                                                                                                                                                                                                                                                                                                                                                                                                                                                                                                                                                                                                                                                                                                                                                                                                                                                                                                                                                                                                                                                                                                                                                                                                                                                                           | 3.283463 | 2.861606 | 1.769964 | 1.764666 |   |   |     |          |  |  |  |  |     |          |          |  |  |  |     |          |          |          |  |  |     |          |          |          |          |  |     |          |          |          |          |          |     |          |          |          |          |          |      |          |          |          |          |          |      |          |          |          |          |          |     |          |          |          |          |          |      |          |          |          |          |          |      |          |          |          |          |          |      |          |          |          |          |          |  |   |   |   |   |    |     |          |  |  |  |  |      |          |          |  |  |  |      |          |          |          |  |  |     |          |          |          |          |  |      |          |          |          |          |          |      |          |          |          |          |          |      |          |          |          |          |          |  |    |    |  |  |  |      |          |          |  |  |  |      |          |          |  |  |  |
| 12 P                                                                                                                                         | 1.974621                                                                                                                                                                                                                                                                                                                                                                                                                                                                                                                                                                                                                                                                                                                                                                                                                                                                                                                                                                                                                                                                                                                                                                                                                                                                                                                                                                                                                                                                                                                                                                                                                                                                                                                                                                                                                                                                                                                                                                                                                                                                                                                                                                                                                                                                                                                                                                                                           | 2.092825 | 1.989661 | 3.019668 | 3.020275 |   |   |     |          |  |  |  |  |     |          |          |  |  |  |     |          |          |          |  |  |     |          |          |          |          |  |     |          |          |          |          |          |     |          |          |          |          |          |      |          |          |          |          |          |      |          |          |          |          |          |     |          |          |          |          |          |      |          |          |          |          |          |      |          |          |          |          |          |      |          |          |          |          |          |  |   |   |   |   |    |     |          |  |  |  |  |      |          |          |  |  |  |      |          |          |          |  |  |     |          |          |          |          |  |      |          |          |          |          |          |      |          |          |          |          |          |      |          |          |          |          |          |  |    |    |  |  |  |      |          |          |  |  |  |      |          |          |  |  |  |
|                                                                                                                                              | 11                                                                                                                                                                                                                                                                                                                                                                                                                                                                                                                                                                                                                                                                                                                                                                                                                                                                                                                                                                                                                                                                                                                                                                                                                                                                                                                                                                                                                                                                                                                                                                                                                                                                                                                                                                                                                                                                                                                                                                                                                                                                                                                                                                                                                                                                                                                                                                                                                 | 12       |          |          |          |   |   |     |          |  |  |  |  |     |          |          |  |  |  |     |          |          |          |  |  |     |          |          |          |          |  |     |          |          |          |          |          |     |          |          |          |          |          |      |          |          |          |          |          |      |          |          |          |          |          |     |          |          |          |          |          |      |          |          |          |          |          |      |          |          |          |          |          |      |          |          |          |          |          |  |   |   |   |   |    |     |          |  |  |  |  |      |          |          |  |  |  |      |          |          |          |  |  |     |          |          |          |          |  |      |          |          |          |          |          |      |          |          |          |          |          |      |          |          |          |          |          |  |    |    |  |  |  |      |          |          |  |  |  |      |          |          |  |  |  |
| 11 B                                                                                                                                         | 0.000000                                                                                                                                                                                                                                                                                                                                                                                                                                                                                                                                                                                                                                                                                                                                                                                                                                                                                                                                                                                                                                                                                                                                                                                                                                                                                                                                                                                                                                                                                                                                                                                                                                                                                                                                                                                                                                                                                                                                                                                                                                                                                                                                                                                                                                                                                                                                                                                                           |          |          |          |          |   |   |     |          |  |  |  |  |     |          |          |  |  |  |     |          |          |          |  |  |     |          |          |          |          |  |     |          |          |          |          |          |     |          |          |          |          |          |      |          |          |          |          |          |      |          |          |          |          |          |     |          |          |          |          |          |      |          |          |          |          |          |      |          |          |          |          |          |      |          |          |          |          |          |  |   |   |   |   |    |     |          |  |  |  |  |      |          |          |  |  |  |      |          |          |          |  |  |     |          |          |          |          |  |      |          |          |          |          |          |      |          |          |          |          |          |      |          |          |          |          |          |  |    |    |  |  |  |      |          |          |  |  |  |      |          |          |  |  |  |
| 12 P                                                                                                                                         | 3.531869                                                                                                                                                                                                                                                                                                                                                                                                                                                                                                                                                                                                                                                                                                                                                                                                                                                                                                                                                                                                                                                                                                                                                                                                                                                                                                                                                                                                                                                                                                                                                                                                                                                                                                                                                                                                                                                                                                                                                                                                                                                                                                                                                                                                                                                                                                                                                                                                           | 0.000000 |          |          |          |   |   |     |          |  |  |  |  |     |          |          |  |  |  |     |          |          |          |  |  |     |          |          |          |          |  |     |          |          |          |          |          |     |          |          |          |          |          |      |          |          |          |          |          |      |          |          |          |          |          |     |          |          |          |          |          |      |          |          |          |          |          |      |          |          |          |          |          |      |          |          |          |          |          |  |   |   |   |   |    |     |          |  |  |  |  |      |          |          |  |  |  |      |          |          |          |  |  |     |          |          |          |          |  |      |          |          |          |          |          |      |          |          |          |          |          |      |          |          |          |          |          |  |    |    |  |  |  |      |          |          |  |  |  |      |          |          |  |  |  |
|  <p>4. -2106.11976760 +9.4<br/>C<sub>s</sub> H/L 3.02</p> | <table border="1"> <thead> <tr> <th></th> <th>1</th> <th>2</th> <th>3</th> <th>4</th> <th>5</th> </tr> </thead> <tbody> <tr><td>1 B</td><td>0.000000</td><td></td><td></td><td></td><td></td></tr> <tr><td>2 B</td><td>3.418399</td><td>0.000000</td><td></td><td></td><td></td></tr> <tr><td>3 B</td><td>1.747547</td><td>2.881071</td><td>0.000000</td><td></td><td></td></tr> <tr><td>4 C</td><td>1.669102</td><td>2.742217</td><td>1.690695</td><td>0.000000</td><td></td></tr> <tr><td>5 B</td><td>2.891190</td><td>1.784192</td><td>2.867900</td><td>1.690762</td><td>0.000000</td></tr> <tr><td>6 B</td><td>2.845760</td><td>1.771377</td><td>1.759498</td><td>1.682033</td><td>1.759497</td></tr> <tr><td>7 B</td><td>1.860579</td><td>2.943065</td><td>1.753822</td><td>2.780013</td><td>3.459829</td></tr> <tr><td>8 Fe</td><td>3.339261</td><td>2.090475</td><td>3.302681</td><td>3.692992</td><td>3.302626</td></tr> <tr><td>9 P</td><td>1.974997</td><td>3.019760</td><td>3.038001</td><td>2.905211</td><td>3.038028</td></tr> <tr><td>10 B</td><td>3.032934</td><td>1.768602</td><td>3.459850</td><td>2.780082</td><td>1.753875</td></tr> <tr><td>11 B</td><td>1.849700</td><td>2.895731</td><td>2.891133</td><td>1.669094</td><td>1.747627</td></tr> <tr><td>12 B</td><td>2.895681</td><td>1.784200</td><td>1.784221</td><td>2.742152</td><td>2.880977</td></tr> <tr> <th></th> <th>6</th> <th>7</th> <th>8</th> <th>9</th> <th>10</th> </tr> <tr><td>6 B</td><td>0.000000</td><td></td><td></td><td></td><td></td></tr> <tr><td>7 B</td><td>2.875069</td><td>0.000000</td><td></td><td></td><td></td></tr> <tr><td>8 Fe</td><td>3.290852</td><td>2.138754</td><td>0.000000</td><td></td><td></td></tr> <tr><td>9 P</td><td>3.535636</td><td>1.990087</td><td>2.082377</td><td>0.000000</td><td></td></tr> <tr><td>10 B</td><td>2.875120</td><td>3.101400</td><td>2.138654</td><td>1.990084</td><td>0.000000</td></tr> <tr><td>11 B</td><td>2.845773</td><td>3.032906</td><td>3.339274</td><td>1.975020</td><td>1.860681</td></tr> <tr><td>12 B</td><td>1.771289</td><td>1.768631</td><td>2.090530</td><td>3.019757</td><td>2.943029</td></tr> <tr> <th></th> <th>11</th> <th>12</th> <th colspan="3"></th> </tr> <tr><td>12 B</td><td>3.418369</td><td>0.000000</td><td></td><td></td><td></td></tr> </tbody> </table>                                                                             |          | 1        | 2        | 3        | 4 | 5 | 1 B | 0.000000 |  |  |  |  | 2 B | 3.418399 | 0.000000 |  |  |  | 3 B | 1.747547 | 2.881071 | 0.000000 |  |  | 4 C | 1.669102 | 2.742217 | 1.690695 | 0.000000 |  | 5 B | 2.891190 | 1.784192 | 2.867900 | 1.690762 | 0.000000 | 6 B | 2.845760 | 1.771377 | 1.759498 | 1.682033 | 1.759497 | 7 B  | 1.860579 | 2.943065 | 1.753822 | 2.780013 | 3.459829 | 8 Fe | 3.339261 | 2.090475 | 3.302681 | 3.692992 | 3.302626 | 9 P | 1.974997 | 3.019760 | 3.038001 | 2.905211 | 3.038028 | 10 B | 3.032934 | 1.768602 | 3.459850 | 2.780082 | 1.753875 | 11 B | 1.849700 | 2.895731 | 2.891133 | 1.669094 | 1.747627 | 12 B | 2.895681 | 1.784200 | 1.784221 | 2.742152 | 2.880977 |  | 6 | 7 | 8 | 9 | 10 | 6 B | 0.000000 |  |  |  |  | 7 B  | 2.875069 | 0.000000 |  |  |  | 8 Fe | 3.290852 | 2.138754 | 0.000000 |  |  | 9 P | 3.535636 | 1.990087 | 2.082377 | 0.000000 |  | 10 B | 2.875120 | 3.101400 | 2.138654 | 1.990084 | 0.000000 | 11 B | 2.845773 | 3.032906 | 3.339274 | 1.975020 | 1.860681 | 12 B | 1.771289 | 1.768631 | 2.090530 | 3.019757 | 2.943029 |  | 11 | 12 |  |  |  | 12 B | 3.418369 | 0.000000 |  |  |  |      |          |          |  |  |  |
|                                                                                                                                              | 1                                                                                                                                                                                                                                                                                                                                                                                                                                                                                                                                                                                                                                                                                                                                                                                                                                                                                                                                                                                                                                                                                                                                                                                                                                                                                                                                                                                                                                                                                                                                                                                                                                                                                                                                                                                                                                                                                                                                                                                                                                                                                                                                                                                                                                                                                                                                                                                                                  | 2        | 3        | 4        | 5        |   |   |     |          |  |  |  |  |     |          |          |  |  |  |     |          |          |          |  |  |     |          |          |          |          |  |     |          |          |          |          |          |     |          |          |          |          |          |      |          |          |          |          |          |      |          |          |          |          |          |     |          |          |          |          |          |      |          |          |          |          |          |      |          |          |          |          |          |      |          |          |          |          |          |  |   |   |   |   |    |     |          |  |  |  |  |      |          |          |  |  |  |      |          |          |          |  |  |     |          |          |          |          |  |      |          |          |          |          |          |      |          |          |          |          |          |      |          |          |          |          |          |  |    |    |  |  |  |      |          |          |  |  |  |      |          |          |  |  |  |
| 1 B                                                                                                                                          | 0.000000                                                                                                                                                                                                                                                                                                                                                                                                                                                                                                                                                                                                                                                                                                                                                                                                                                                                                                                                                                                                                                                                                                                                                                                                                                                                                                                                                                                                                                                                                                                                                                                                                                                                                                                                                                                                                                                                                                                                                                                                                                                                                                                                                                                                                                                                                                                                                                                                           |          |          |          |          |   |   |     |          |  |  |  |  |     |          |          |  |  |  |     |          |          |          |  |  |     |          |          |          |          |  |     |          |          |          |          |          |     |          |          |          |          |          |      |          |          |          |          |          |      |          |          |          |          |          |     |          |          |          |          |          |      |          |          |          |          |          |      |          |          |          |          |          |      |          |          |          |          |          |  |   |   |   |   |    |     |          |  |  |  |  |      |          |          |  |  |  |      |          |          |          |  |  |     |          |          |          |          |  |      |          |          |          |          |          |      |          |          |          |          |          |      |          |          |          |          |          |  |    |    |  |  |  |      |          |          |  |  |  |      |          |          |  |  |  |
| 2 B                                                                                                                                          | 3.418399                                                                                                                                                                                                                                                                                                                                                                                                                                                                                                                                                                                                                                                                                                                                                                                                                                                                                                                                                                                                                                                                                                                                                                                                                                                                                                                                                                                                                                                                                                                                                                                                                                                                                                                                                                                                                                                                                                                                                                                                                                                                                                                                                                                                                                                                                                                                                                                                           | 0.000000 |          |          |          |   |   |     |          |  |  |  |  |     |          |          |  |  |  |     |          |          |          |  |  |     |          |          |          |          |  |     |          |          |          |          |          |     |          |          |          |          |          |      |          |          |          |          |          |      |          |          |          |          |          |     |          |          |          |          |          |      |          |          |          |          |          |      |          |          |          |          |          |      |          |          |          |          |          |  |   |   |   |   |    |     |          |  |  |  |  |      |          |          |  |  |  |      |          |          |          |  |  |     |          |          |          |          |  |      |          |          |          |          |          |      |          |          |          |          |          |      |          |          |          |          |          |  |    |    |  |  |  |      |          |          |  |  |  |      |          |          |  |  |  |
| 3 B                                                                                                                                          | 1.747547                                                                                                                                                                                                                                                                                                                                                                                                                                                                                                                                                                                                                                                                                                                                                                                                                                                                                                                                                                                                                                                                                                                                                                                                                                                                                                                                                                                                                                                                                                                                                                                                                                                                                                                                                                                                                                                                                                                                                                                                                                                                                                                                                                                                                                                                                                                                                                                                           | 2.881071 | 0.000000 |          |          |   |   |     |          |  |  |  |  |     |          |          |  |  |  |     |          |          |          |  |  |     |          |          |          |          |  |     |          |          |          |          |          |     |          |          |          |          |          |      |          |          |          |          |          |      |          |          |          |          |          |     |          |          |          |          |          |      |          |          |          |          |          |      |          |          |          |          |          |      |          |          |          |          |          |  |   |   |   |   |    |     |          |  |  |  |  |      |          |          |  |  |  |      |          |          |          |  |  |     |          |          |          |          |  |      |          |          |          |          |          |      |          |          |          |          |          |      |          |          |          |          |          |  |    |    |  |  |  |      |          |          |  |  |  |      |          |          |  |  |  |
| 4 C                                                                                                                                          | 1.669102                                                                                                                                                                                                                                                                                                                                                                                                                                                                                                                                                                                                                                                                                                                                                                                                                                                                                                                                                                                                                                                                                                                                                                                                                                                                                                                                                                                                                                                                                                                                                                                                                                                                                                                                                                                                                                                                                                                                                                                                                                                                                                                                                                                                                                                                                                                                                                                                           | 2.742217 | 1.690695 | 0.000000 |          |   |   |     |          |  |  |  |  |     |          |          |  |  |  |     |          |          |          |  |  |     |          |          |          |          |  |     |          |          |          |          |          |     |          |          |          |          |          |      |          |          |          |          |          |      |          |          |          |          |          |     |          |          |          |          |          |      |          |          |          |          |          |      |          |          |          |          |          |      |          |          |          |          |          |  |   |   |   |   |    |     |          |  |  |  |  |      |          |          |  |  |  |      |          |          |          |  |  |     |          |          |          |          |  |      |          |          |          |          |          |      |          |          |          |          |          |      |          |          |          |          |          |  |    |    |  |  |  |      |          |          |  |  |  |      |          |          |  |  |  |
| 5 B                                                                                                                                          | 2.891190                                                                                                                                                                                                                                                                                                                                                                                                                                                                                                                                                                                                                                                                                                                                                                                                                                                                                                                                                                                                                                                                                                                                                                                                                                                                                                                                                                                                                                                                                                                                                                                                                                                                                                                                                                                                                                                                                                                                                                                                                                                                                                                                                                                                                                                                                                                                                                                                           | 1.784192 | 2.867900 | 1.690762 | 0.000000 |   |   |     |          |  |  |  |  |     |          |          |  |  |  |     |          |          |          |  |  |     |          |          |          |          |  |     |          |          |          |          |          |     |          |          |          |          |          |      |          |          |          |          |          |      |          |          |          |          |          |     |          |          |          |          |          |      |          |          |          |          |          |      |          |          |          |          |          |      |          |          |          |          |          |  |   |   |   |   |    |     |          |  |  |  |  |      |          |          |  |  |  |      |          |          |          |  |  |     |          |          |          |          |  |      |          |          |          |          |          |      |          |          |          |          |          |      |          |          |          |          |          |  |    |    |  |  |  |      |          |          |  |  |  |      |          |          |  |  |  |
| 6 B                                                                                                                                          | 2.845760                                                                                                                                                                                                                                                                                                                                                                                                                                                                                                                                                                                                                                                                                                                                                                                                                                                                                                                                                                                                                                                                                                                                                                                                                                                                                                                                                                                                                                                                                                                                                                                                                                                                                                                                                                                                                                                                                                                                                                                                                                                                                                                                                                                                                                                                                                                                                                                                           | 1.771377 | 1.759498 | 1.682033 | 1.759497 |   |   |     |          |  |  |  |  |     |          |          |  |  |  |     |          |          |          |  |  |     |          |          |          |          |  |     |          |          |          |          |          |     |          |          |          |          |          |      |          |          |          |          |          |      |          |          |          |          |          |     |          |          |          |          |          |      |          |          |          |          |          |      |          |          |          |          |          |      |          |          |          |          |          |  |   |   |   |   |    |     |          |  |  |  |  |      |          |          |  |  |  |      |          |          |          |  |  |     |          |          |          |          |  |      |          |          |          |          |          |      |          |          |          |          |          |      |          |          |          |          |          |  |    |    |  |  |  |      |          |          |  |  |  |      |          |          |  |  |  |
| 7 B                                                                                                                                          | 1.860579                                                                                                                                                                                                                                                                                                                                                                                                                                                                                                                                                                                                                                                                                                                                                                                                                                                                                                                                                                                                                                                                                                                                                                                                                                                                                                                                                                                                                                                                                                                                                                                                                                                                                                                                                                                                                                                                                                                                                                                                                                                                                                                                                                                                                                                                                                                                                                                                           | 2.943065 | 1.753822 | 2.780013 | 3.459829 |   |   |     |          |  |  |  |  |     |          |          |  |  |  |     |          |          |          |  |  |     |          |          |          |          |  |     |          |          |          |          |          |     |          |          |          |          |          |      |          |          |          |          |          |      |          |          |          |          |          |     |          |          |          |          |          |      |          |          |          |          |          |      |          |          |          |          |          |      |          |          |          |          |          |  |   |   |   |   |    |     |          |  |  |  |  |      |          |          |  |  |  |      |          |          |          |  |  |     |          |          |          |          |  |      |          |          |          |          |          |      |          |          |          |          |          |      |          |          |          |          |          |  |    |    |  |  |  |      |          |          |  |  |  |      |          |          |  |  |  |
| 8 Fe                                                                                                                                         | 3.339261                                                                                                                                                                                                                                                                                                                                                                                                                                                                                                                                                                                                                                                                                                                                                                                                                                                                                                                                                                                                                                                                                                                                                                                                                                                                                                                                                                                                                                                                                                                                                                                                                                                                                                                                                                                                                                                                                                                                                                                                                                                                                                                                                                                                                                                                                                                                                                                                           | 2.090475 | 3.302681 | 3.692992 | 3.302626 |   |   |     |          |  |  |  |  |     |          |          |  |  |  |     |          |          |          |  |  |     |          |          |          |          |  |     |          |          |          |          |          |     |          |          |          |          |          |      |          |          |          |          |          |      |          |          |          |          |          |     |          |          |          |          |          |      |          |          |          |          |          |      |          |          |          |          |          |      |          |          |          |          |          |  |   |   |   |   |    |     |          |  |  |  |  |      |          |          |  |  |  |      |          |          |          |  |  |     |          |          |          |          |  |      |          |          |          |          |          |      |          |          |          |          |          |      |          |          |          |          |          |  |    |    |  |  |  |      |          |          |  |  |  |      |          |          |  |  |  |
| 9 P                                                                                                                                          | 1.974997                                                                                                                                                                                                                                                                                                                                                                                                                                                                                                                                                                                                                                                                                                                                                                                                                                                                                                                                                                                                                                                                                                                                                                                                                                                                                                                                                                                                                                                                                                                                                                                                                                                                                                                                                                                                                                                                                                                                                                                                                                                                                                                                                                                                                                                                                                                                                                                                           | 3.019760 | 3.038001 | 2.905211 | 3.038028 |   |   |     |          |  |  |  |  |     |          |          |  |  |  |     |          |          |          |  |  |     |          |          |          |          |  |     |          |          |          |          |          |     |          |          |          |          |          |      |          |          |          |          |          |      |          |          |          |          |          |     |          |          |          |          |          |      |          |          |          |          |          |      |          |          |          |          |          |      |          |          |          |          |          |  |   |   |   |   |    |     |          |  |  |  |  |      |          |          |  |  |  |      |          |          |          |  |  |     |          |          |          |          |  |      |          |          |          |          |          |      |          |          |          |          |          |      |          |          |          |          |          |  |    |    |  |  |  |      |          |          |  |  |  |      |          |          |  |  |  |
| 10 B                                                                                                                                         | 3.032934                                                                                                                                                                                                                                                                                                                                                                                                                                                                                                                                                                                                                                                                                                                                                                                                                                                                                                                                                                                                                                                                                                                                                                                                                                                                                                                                                                                                                                                                                                                                                                                                                                                                                                                                                                                                                                                                                                                                                                                                                                                                                                                                                                                                                                                                                                                                                                                                           | 1.768602 | 3.459850 | 2.780082 | 1.753875 |   |   |     |          |  |  |  |  |     |          |          |  |  |  |     |          |          |          |  |  |     |          |          |          |          |  |     |          |          |          |          |          |     |          |          |          |          |          |      |          |          |          |          |          |      |          |          |          |          |          |     |          |          |          |          |          |      |          |          |          |          |          |      |          |          |          |          |          |      |          |          |          |          |          |  |   |   |   |   |    |     |          |  |  |  |  |      |          |          |  |  |  |      |          |          |          |  |  |     |          |          |          |          |  |      |          |          |          |          |          |      |          |          |          |          |          |      |          |          |          |          |          |  |    |    |  |  |  |      |          |          |  |  |  |      |          |          |  |  |  |
| 11 B                                                                                                                                         | 1.849700                                                                                                                                                                                                                                                                                                                                                                                                                                                                                                                                                                                                                                                                                                                                                                                                                                                                                                                                                                                                                                                                                                                                                                                                                                                                                                                                                                                                                                                                                                                                                                                                                                                                                                                                                                                                                                                                                                                                                                                                                                                                                                                                                                                                                                                                                                                                                                                                           | 2.895731 | 2.891133 | 1.669094 | 1.747627 |   |   |     |          |  |  |  |  |     |          |          |  |  |  |     |          |          |          |  |  |     |          |          |          |          |  |     |          |          |          |          |          |     |          |          |          |          |          |      |          |          |          |          |          |      |          |          |          |          |          |     |          |          |          |          |          |      |          |          |          |          |          |      |          |          |          |          |          |      |          |          |          |          |          |  |   |   |   |   |    |     |          |  |  |  |  |      |          |          |  |  |  |      |          |          |          |  |  |     |          |          |          |          |  |      |          |          |          |          |          |      |          |          |          |          |          |      |          |          |          |          |          |  |    |    |  |  |  |      |          |          |  |  |  |      |          |          |  |  |  |
| 12 B                                                                                                                                         | 2.895681                                                                                                                                                                                                                                                                                                                                                                                                                                                                                                                                                                                                                                                                                                                                                                                                                                                                                                                                                                                                                                                                                                                                                                                                                                                                                                                                                                                                                                                                                                                                                                                                                                                                                                                                                                                                                                                                                                                                                                                                                                                                                                                                                                                                                                                                                                                                                                                                           | 1.784200 | 1.784221 | 2.742152 | 2.880977 |   |   |     |          |  |  |  |  |     |          |          |  |  |  |     |          |          |          |  |  |     |          |          |          |          |  |     |          |          |          |          |          |     |          |          |          |          |          |      |          |          |          |          |          |      |          |          |          |          |          |     |          |          |          |          |          |      |          |          |          |          |          |      |          |          |          |          |          |      |          |          |          |          |          |  |   |   |   |   |    |     |          |  |  |  |  |      |          |          |  |  |  |      |          |          |          |  |  |     |          |          |          |          |  |      |          |          |          |          |          |      |          |          |          |          |          |      |          |          |          |          |          |  |    |    |  |  |  |      |          |          |  |  |  |      |          |          |  |  |  |
|                                                                                                                                              | 6                                                                                                                                                                                                                                                                                                                                                                                                                                                                                                                                                                                                                                                                                                                                                                                                                                                                                                                                                                                                                                                                                                                                                                                                                                                                                                                                                                                                                                                                                                                                                                                                                                                                                                                                                                                                                                                                                                                                                                                                                                                                                                                                                                                                                                                                                                                                                                                                                  | 7        | 8        | 9        | 10       |   |   |     |          |  |  |  |  |     |          |          |  |  |  |     |          |          |          |  |  |     |          |          |          |          |  |     |          |          |          |          |          |     |          |          |          |          |          |      |          |          |          |          |          |      |          |          |          |          |          |     |          |          |          |          |          |      |          |          |          |          |          |      |          |          |          |          |          |      |          |          |          |          |          |  |   |   |   |   |    |     |          |  |  |  |  |      |          |          |  |  |  |      |          |          |          |  |  |     |          |          |          |          |  |      |          |          |          |          |          |      |          |          |          |          |          |      |          |          |          |          |          |  |    |    |  |  |  |      |          |          |  |  |  |      |          |          |  |  |  |
| 6 B                                                                                                                                          | 0.000000                                                                                                                                                                                                                                                                                                                                                                                                                                                                                                                                                                                                                                                                                                                                                                                                                                                                                                                                                                                                                                                                                                                                                                                                                                                                                                                                                                                                                                                                                                                                                                                                                                                                                                                                                                                                                                                                                                                                                                                                                                                                                                                                                                                                                                                                                                                                                                                                           |          |          |          |          |   |   |     |          |  |  |  |  |     |          |          |  |  |  |     |          |          |          |  |  |     |          |          |          |          |  |     |          |          |          |          |          |     |          |          |          |          |          |      |          |          |          |          |          |      |          |          |          |          |          |     |          |          |          |          |          |      |          |          |          |          |          |      |          |          |          |          |          |      |          |          |          |          |          |  |   |   |   |   |    |     |          |  |  |  |  |      |          |          |  |  |  |      |          |          |          |  |  |     |          |          |          |          |  |      |          |          |          |          |          |      |          |          |          |          |          |      |          |          |          |          |          |  |    |    |  |  |  |      |          |          |  |  |  |      |          |          |  |  |  |
| 7 B                                                                                                                                          | 2.875069                                                                                                                                                                                                                                                                                                                                                                                                                                                                                                                                                                                                                                                                                                                                                                                                                                                                                                                                                                                                                                                                                                                                                                                                                                                                                                                                                                                                                                                                                                                                                                                                                                                                                                                                                                                                                                                                                                                                                                                                                                                                                                                                                                                                                                                                                                                                                                                                           | 0.000000 |          |          |          |   |   |     |          |  |  |  |  |     |          |          |  |  |  |     |          |          |          |  |  |     |          |          |          |          |  |     |          |          |          |          |          |     |          |          |          |          |          |      |          |          |          |          |          |      |          |          |          |          |          |     |          |          |          |          |          |      |          |          |          |          |          |      |          |          |          |          |          |      |          |          |          |          |          |  |   |   |   |   |    |     |          |  |  |  |  |      |          |          |  |  |  |      |          |          |          |  |  |     |          |          |          |          |  |      |          |          |          |          |          |      |          |          |          |          |          |      |          |          |          |          |          |  |    |    |  |  |  |      |          |          |  |  |  |      |          |          |  |  |  |
| 8 Fe                                                                                                                                         | 3.290852                                                                                                                                                                                                                                                                                                                                                                                                                                                                                                                                                                                                                                                                                                                                                                                                                                                                                                                                                                                                                                                                                                                                                                                                                                                                                                                                                                                                                                                                                                                                                                                                                                                                                                                                                                                                                                                                                                                                                                                                                                                                                                                                                                                                                                                                                                                                                                                                           | 2.138754 | 0.000000 |          |          |   |   |     |          |  |  |  |  |     |          |          |  |  |  |     |          |          |          |  |  |     |          |          |          |          |  |     |          |          |          |          |          |     |          |          |          |          |          |      |          |          |          |          |          |      |          |          |          |          |          |     |          |          |          |          |          |      |          |          |          |          |          |      |          |          |          |          |          |      |          |          |          |          |          |  |   |   |   |   |    |     |          |  |  |  |  |      |          |          |  |  |  |      |          |          |          |  |  |     |          |          |          |          |  |      |          |          |          |          |          |      |          |          |          |          |          |      |          |          |          |          |          |  |    |    |  |  |  |      |          |          |  |  |  |      |          |          |  |  |  |
| 9 P                                                                                                                                          | 3.535636                                                                                                                                                                                                                                                                                                                                                                                                                                                                                                                                                                                                                                                                                                                                                                                                                                                                                                                                                                                                                                                                                                                                                                                                                                                                                                                                                                                                                                                                                                                                                                                                                                                                                                                                                                                                                                                                                                                                                                                                                                                                                                                                                                                                                                                                                                                                                                                                           | 1.990087 | 2.082377 | 0.000000 |          |   |   |     |          |  |  |  |  |     |          |          |  |  |  |     |          |          |          |  |  |     |          |          |          |          |  |     |          |          |          |          |          |     |          |          |          |          |          |      |          |          |          |          |          |      |          |          |          |          |          |     |          |          |          |          |          |      |          |          |          |          |          |      |          |          |          |          |          |      |          |          |          |          |          |  |   |   |   |   |    |     |          |  |  |  |  |      |          |          |  |  |  |      |          |          |          |  |  |     |          |          |          |          |  |      |          |          |          |          |          |      |          |          |          |          |          |      |          |          |          |          |          |  |    |    |  |  |  |      |          |          |  |  |  |      |          |          |  |  |  |
| 10 B                                                                                                                                         | 2.875120                                                                                                                                                                                                                                                                                                                                                                                                                                                                                                                                                                                                                                                                                                                                                                                                                                                                                                                                                                                                                                                                                                                                                                                                                                                                                                                                                                                                                                                                                                                                                                                                                                                                                                                                                                                                                                                                                                                                                                                                                                                                                                                                                                                                                                                                                                                                                                                                           | 3.101400 | 2.138654 | 1.990084 | 0.000000 |   |   |     |          |  |  |  |  |     |          |          |  |  |  |     |          |          |          |  |  |     |          |          |          |          |  |     |          |          |          |          |          |     |          |          |          |          |          |      |          |          |          |          |          |      |          |          |          |          |          |     |          |          |          |          |          |      |          |          |          |          |          |      |          |          |          |          |          |      |          |          |          |          |          |  |   |   |   |   |    |     |          |  |  |  |  |      |          |          |  |  |  |      |          |          |          |  |  |     |          |          |          |          |  |      |          |          |          |          |          |      |          |          |          |          |          |      |          |          |          |          |          |  |    |    |  |  |  |      |          |          |  |  |  |      |          |          |  |  |  |
| 11 B                                                                                                                                         | 2.845773                                                                                                                                                                                                                                                                                                                                                                                                                                                                                                                                                                                                                                                                                                                                                                                                                                                                                                                                                                                                                                                                                                                                                                                                                                                                                                                                                                                                                                                                                                                                                                                                                                                                                                                                                                                                                                                                                                                                                                                                                                                                                                                                                                                                                                                                                                                                                                                                           | 3.032906 | 3.339274 | 1.975020 | 1.860681 |   |   |     |          |  |  |  |  |     |          |          |  |  |  |     |          |          |          |  |  |     |          |          |          |          |  |     |          |          |          |          |          |     |          |          |          |          |          |      |          |          |          |          |          |      |          |          |          |          |          |     |          |          |          |          |          |      |          |          |          |          |          |      |          |          |          |          |          |      |          |          |          |          |          |  |   |   |   |   |    |     |          |  |  |  |  |      |          |          |  |  |  |      |          |          |          |  |  |     |          |          |          |          |  |      |          |          |          |          |          |      |          |          |          |          |          |      |          |          |          |          |          |  |    |    |  |  |  |      |          |          |  |  |  |      |          |          |  |  |  |
| 12 B                                                                                                                                         | 1.771289                                                                                                                                                                                                                                                                                                                                                                                                                                                                                                                                                                                                                                                                                                                                                                                                                                                                                                                                                                                                                                                                                                                                                                                                                                                                                                                                                                                                                                                                                                                                                                                                                                                                                                                                                                                                                                                                                                                                                                                                                                                                                                                                                                                                                                                                                                                                                                                                           | 1.768631 | 2.090530 | 3.019757 | 2.943029 |   |   |     |          |  |  |  |  |     |          |          |  |  |  |     |          |          |          |  |  |     |          |          |          |          |  |     |          |          |          |          |          |     |          |          |          |          |          |      |          |          |          |          |          |      |          |          |          |          |          |     |          |          |          |          |          |      |          |          |          |          |          |      |          |          |          |          |          |      |          |          |          |          |          |  |   |   |   |   |    |     |          |  |  |  |  |      |          |          |  |  |  |      |          |          |          |  |  |     |          |          |          |          |  |      |          |          |          |          |          |      |          |          |          |          |          |      |          |          |          |          |          |  |    |    |  |  |  |      |          |          |  |  |  |      |          |          |  |  |  |
|                                                                                                                                              | 11                                                                                                                                                                                                                                                                                                                                                                                                                                                                                                                                                                                                                                                                                                                                                                                                                                                                                                                                                                                                                                                                                                                                                                                                                                                                                                                                                                                                                                                                                                                                                                                                                                                                                                                                                                                                                                                                                                                                                                                                                                                                                                                                                                                                                                                                                                                                                                                                                 | 12       |          |          |          |   |   |     |          |  |  |  |  |     |          |          |  |  |  |     |          |          |          |  |  |     |          |          |          |          |  |     |          |          |          |          |          |     |          |          |          |          |          |      |          |          |          |          |          |      |          |          |          |          |          |     |          |          |          |          |          |      |          |          |          |          |          |      |          |          |          |          |          |      |          |          |          |          |          |  |   |   |   |   |    |     |          |  |  |  |  |      |          |          |  |  |  |      |          |          |          |  |  |     |          |          |          |          |  |      |          |          |          |          |          |      |          |          |          |          |          |      |          |          |          |          |          |  |    |    |  |  |  |      |          |          |  |  |  |      |          |          |  |  |  |
| 12 B                                                                                                                                         | 3.418369                                                                                                                                                                                                                                                                                                                                                                                                                                                                                                                                                                                                                                                                                                                                                                                                                                                                                                                                                                                                                                                                                                                                                                                                                                                                                                                                                                                                                                                                                                                                                                                                                                                                                                                                                                                                                                                                                                                                                                                                                                                                                                                                                                                                                                                                                                                                                                                                           | 0.000000 |          |          |          |   |   |     |          |  |  |  |  |     |          |          |  |  |  |     |          |          |          |  |  |     |          |          |          |          |  |     |          |          |          |          |          |     |          |          |          |          |          |      |          |          |          |          |          |      |          |          |          |          |          |     |          |          |          |          |          |      |          |          |          |          |          |      |          |          |          |          |          |      |          |          |          |          |          |  |   |   |   |   |    |     |          |  |  |  |  |      |          |          |  |  |  |      |          |          |          |  |  |     |          |          |          |          |  |      |          |          |          |          |          |      |          |          |          |          |          |      |          |          |          |          |          |  |    |    |  |  |  |      |          |          |  |  |  |      |          |          |  |  |  |

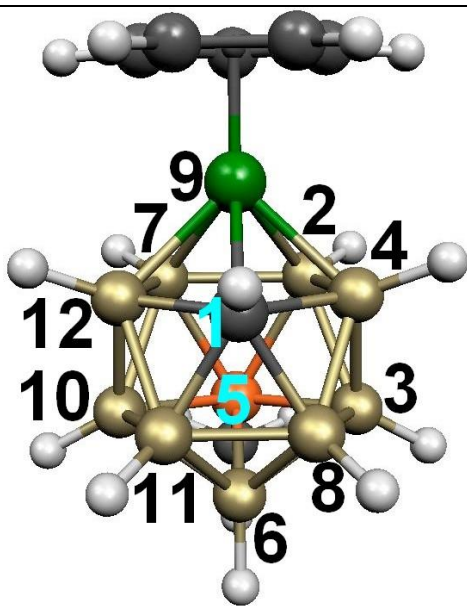

5. -2106.10367930 +19.5  
C<sub>s</sub> H/L 3.04

|    | 1  | 2        | 3        | 4        | 5        |          |
|----|----|----------|----------|----------|----------|----------|
| 1  | C  | 0.000000 |          |          |          |          |
| 2  | B  | 2.788089 | 0.000000 |          |          |          |
| 3  | B  | 2.745485 | 1.912868 | 0.000000 |          |          |
| 4  | B  | 1.689684 | 1.777262 | 1.774062 | 0.000000 |          |
| 5  | P  | 3.359001 | 1.969653 | 1.949840 | 2.999104 | 0.000000 |
| 6  | B  | 2.739626 | 3.085260 | 1.873212 | 2.920495 | 1.970338 |
| 7  | B  | 2.788109 | 1.906600 | 3.070347 | 2.931501 | 1.969760 |
| 8  | B  | 1.688868 | 2.947874 | 1.747379 | 1.788840 | 2.992185 |
| 9  | Fe | 2.009860 | 2.010747 | 3.295810 | 2.029024 | 3.369069 |
| 10 | B  | 2.745449 | 3.070113 | 3.025000 | 3.430732 | 1.949739 |
| 11 | B  | 1.688832 | 3.471280 | 2.895711 | 2.867766 | 2.992124 |
| 12 | B  | 1.689557 | 2.931448 | 3.430838 | 2.850500 | 2.999228 |
|    | 6  | 7        | 8        | 9        | 10       |          |
| 6  | B  | 0.000000 |          |          |          |          |
| 7  | B  | 3.085315 | 0.000000 |          |          |          |
| 8  | B  | 1.739002 | 3.471419 | 0.000000 |          |          |
| 9  | Fe | 3.885245 | 2.010825 | 3.264111 | 0.000000 |          |
| 10 | B  | 1.873168 | 1.912754 | 2.895703 | 3.295788 | 0.000000 |
| 11 | B  | 1.738985 | 2.947783 | 1.762600 | 3.264069 | 1.747334 |
| 12 | B  | 2.920542 | 1.777329 | 2.867759 | 2.029054 | 1.774190 |
|    | 11 | 12       |          |          |          |          |
| 11 | B  | 0.000000 |          |          |          |          |
| 12 | B  | 1.788740 | 0.000000 |          |          |          |

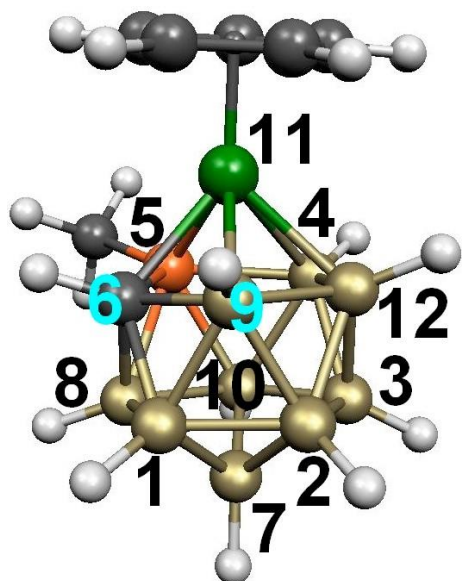

6. -2106.09886950 +22.5  
C<sub>1</sub> H/L 2.94

|    | 1  | 2        | 3        | 4        | 5        |          |
|----|----|----------|----------|----------|----------|----------|
| 1  | B  | 0.000000 |          |          |          |          |
| 2  | B  | 1.759363 | 0.000000 |          |          |          |
| 3  | B  | 2.866464 | 1.761672 | 0.000000 |          |          |
| 4  | B  | 3.471740 | 2.881192 | 1.758414 | 0.000000 |          |
| 5  | P  | 3.076565 | 3.550906 | 3.020010 | 1.970072 | 0.000000 |
| 6  | C  | 1.661706 | 2.735076 | 3.302259 | 2.985008 | 1.983709 |
| 7  | B  | 1.766933 | 1.763962 | 1.770952 | 2.931412 | 3.051129 |
| 8  | B  | 1.754745 | 2.848722 | 2.884352 | 3.026384 | 1.970086 |
| 9  | B  | 1.783244 | 1.775604 | 2.878496 | 2.937426 | 3.038499 |
| 10 | B  | 2.901895 | 2.864551 | 1.761548 | 1.885357 | 1.947762 |
| 11 | Fe | 3.286807 | 3.303711 | 3.327119 | 2.167749 | 2.076306 |
| 12 | B  | 2.880636 | 1.779940 | 1.791911 | 1.755618 | 3.007138 |
|    | 6  | 7        | 8        | 9        | 10       |          |
| 6  | C  | 0.000000 |          |          |          |          |
| 7  | B  | 2.777925 | 0.000000 |          |          |          |
| 8  | B  | 1.756573 | 1.761433 | 0.000000 |          |          |
| 9  | B  | 1.667052 | 2.875965 | 2.871806 | 0.000000 |          |
| 10 | B  | 2.909554 | 1.760345 | 1.842068 | 3.422692 | 0.000000 |
| 11 | Fe | 2.054024 | 3.857340 | 3.284027 | 2.074952 | 3.349154 |
| 12 | B  | 2.800497 | 2.884170 | 3.396723 | 1.777975 | 2.908082 |
|    | 11 | 12       |          |          |          |          |
| 12 | B  | 2.112131 | 0.000000 |          |          |          |

| 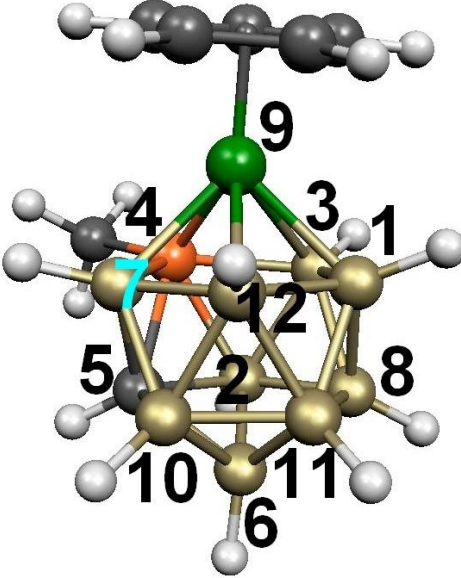 <p>7. -2106.09670600 +23.9<br/>C<sub>1</sub> H/L 3.01</p>   | <table border="1"> <thead> <tr> <th></th> <th>1</th> <th>2</th> <th>3</th> <th>4</th> <th>5</th> </tr> </thead> <tbody> <tr><td>1 B</td><td>0.000000</td><td></td><td></td><td></td><td></td></tr> <tr><td>2 B</td><td>2.890742</td><td>0.000000</td><td></td><td></td><td></td></tr> <tr><td>3 B</td><td>1.764097</td><td>1.868420</td><td>0.000000</td><td></td><td></td></tr> <tr><td>4 P</td><td>2.991764</td><td>1.972897</td><td>1.970879</td><td>0.000000</td><td></td></tr> <tr><td>5 C</td><td>3.250583</td><td>1.749152</td><td>2.901941</td><td>1.934481</td><td>0.000000</td></tr> <tr><td>6 B</td><td>2.866964</td><td>1.761699</td><td>2.926214</td><td>3.075590</td><td>1.681024</td></tr> <tr><td>7 B</td><td>2.914872</td><td>3.003591</td><td>3.087784</td><td>1.989503</td><td>1.783541</td></tr> <tr><td>8 B</td><td>1.793802</td><td>1.752677</td><td>1.758678</td><td>3.035533</td><td>2.754041</td></tr> <tr><td>9 Fe</td><td>2.106969</td><td>3.346285</td><td>2.161468</td><td>2.054985</td><td>3.219857</td></tr> <tr><td>10 B</td><td>2.872017</td><td>2.880436</td><td>3.464761</td><td>3.058328</td><td>1.673382</td></tr> <tr><td>11 B</td><td>1.772566</td><td>2.855569</td><td>2.885721</td><td>3.549372</td><td>2.724012</td></tr> <tr><td>12 B</td><td>1.780305</td><td>3.411384</td><td>2.947770</td><td>3.014005</td><td>2.763356</td></tr> <tr> <td></td> <td>6</td> <td>7</td> <td>8</td> <td>9</td> <td>10</td> </tr> <tr><td>6 B</td><td>0.000000</td><td></td><td></td><td></td><td></td></tr> <tr><td>7 B</td><td>2.911623</td><td>0.000000</td><td></td><td></td><td></td></tr> <tr><td>8 B</td><td>1.762744</td><td>3.447634</td><td>0.000000</td><td></td><td></td></tr> <tr><td>9 Fe</td><td>3.876370</td><td>2.120596</td><td>3.333263</td><td>0.000000</td><td></td></tr> <tr><td>10 B</td><td>1.762893</td><td>1.755395</td><td>2.868805</td><td>3.313068</td><td>0.000000</td></tr> <tr><td>11 B</td><td>1.751995</td><td>2.873648</td><td>1.770362</td><td>3.318437</td><td>1.764606</td></tr> <tr><td>12 B</td><td>2.873020</td><td>1.754832</td><td>2.892133</td><td>2.100136</td><td>1.783396</td></tr> <tr> <td></td> <td>11</td> <td>12</td> <td></td> <td></td> <td></td> </tr> <tr><td>12 B</td><td>1.780203</td><td>0.000000</td><td></td><td></td><td></td></tr> </tbody> </table> |          | 1        | 2        | 3        | 4 | 5 | 1 B | 0.000000 |  |  |  |  | 2 B | 2.890742 | 0.000000 |  |  |  | 3 B | 1.764097 | 1.868420 | 0.000000 |  |  | 4 P | 2.991764 | 1.972897 | 1.970879 | 0.000000 |  | 5 C | 3.250583 | 1.749152 | 2.901941 | 1.934481 | 0.000000 | 6 B | 2.866964 | 1.761699 | 2.926214 | 3.075590 | 1.681024 | 7 B  | 2.914872 | 3.003591 | 3.087784 | 1.989503 | 1.783541 | 8 B | 1.793802 | 1.752677 | 1.758678 | 3.035533 | 2.754041 | 9 Fe | 2.106969 | 3.346285 | 2.161468 | 2.054985 | 3.219857 | 10 B | 2.872017 | 2.880436 | 3.464761 | 3.058328 | 1.673382 | 11 B | 1.772566 | 2.855569 | 2.885721 | 3.549372 | 2.724012 | 12 B | 1.780305 | 3.411384 | 2.947770 | 3.014005 | 2.763356 |  | 6 | 7 | 8 | 9 | 10 | 6 B | 0.000000 |  |  |  |  | 7 B  | 2.911623 | 0.000000 |  |  |  | 8 B | 1.762744 | 3.447634 | 0.000000 |  |  | 9 Fe | 3.876370 | 2.120596 | 3.333263 | 0.000000 |  | 10 B | 1.762893 | 1.755395 | 2.868805 | 3.313068 | 0.000000 | 11 B | 1.751995 | 2.873648 | 1.770362 | 3.318437 | 1.764606 | 12 B | 2.873020 | 1.754832 | 2.892133 | 2.100136 | 1.783396 |  | 11 | 12 |  |  |  | 12 B | 1.780203 | 0.000000 |  |  |  |
|-----------------------------------------------------------------------------------------------------------------------------------------------|------------------------------------------------------------------------------------------------------------------------------------------------------------------------------------------------------------------------------------------------------------------------------------------------------------------------------------------------------------------------------------------------------------------------------------------------------------------------------------------------------------------------------------------------------------------------------------------------------------------------------------------------------------------------------------------------------------------------------------------------------------------------------------------------------------------------------------------------------------------------------------------------------------------------------------------------------------------------------------------------------------------------------------------------------------------------------------------------------------------------------------------------------------------------------------------------------------------------------------------------------------------------------------------------------------------------------------------------------------------------------------------------------------------------------------------------------------------------------------------------------------------------------------------------------------------------------------------------------------------------------------------------------------------------------------------------------------------------------------------------------------------------------------------------------------------------------------------------------------------------------------------------------------------------------------------------------------------------------------------------------------------------------------------------------------------------------------------------------------------------------------------------------------------------------------------------------------------------------------------------------------------------------------------------------------------------------------------------|----------|----------|----------|----------|---|---|-----|----------|--|--|--|--|-----|----------|----------|--|--|--|-----|----------|----------|----------|--|--|-----|----------|----------|----------|----------|--|-----|----------|----------|----------|----------|----------|-----|----------|----------|----------|----------|----------|------|----------|----------|----------|----------|----------|-----|----------|----------|----------|----------|----------|------|----------|----------|----------|----------|----------|------|----------|----------|----------|----------|----------|------|----------|----------|----------|----------|----------|------|----------|----------|----------|----------|----------|--|---|---|---|---|----|-----|----------|--|--|--|--|------|----------|----------|--|--|--|-----|----------|----------|----------|--|--|------|----------|----------|----------|----------|--|------|----------|----------|----------|----------|----------|------|----------|----------|----------|----------|----------|------|----------|----------|----------|----------|----------|--|----|----|--|--|--|------|----------|----------|--|--|--|
|                                                                                                                                               | 1                                                                                                                                                                                                                                                                                                                                                                                                                                                                                                                                                                                                                                                                                                                                                                                                                                                                                                                                                                                                                                                                                                                                                                                                                                                                                                                                                                                                                                                                                                                                                                                                                                                                                                                                                                                                                                                                                                                                                                                                                                                                                                                                                                                                                                                                                                                                              | 2        | 3        | 4        | 5        |   |   |     |          |  |  |  |  |     |          |          |  |  |  |     |          |          |          |  |  |     |          |          |          |          |  |     |          |          |          |          |          |     |          |          |          |          |          |      |          |          |          |          |          |     |          |          |          |          |          |      |          |          |          |          |          |      |          |          |          |          |          |      |          |          |          |          |          |      |          |          |          |          |          |  |   |   |   |   |    |     |          |  |  |  |  |      |          |          |  |  |  |     |          |          |          |  |  |      |          |          |          |          |  |      |          |          |          |          |          |      |          |          |          |          |          |      |          |          |          |          |          |  |    |    |  |  |  |      |          |          |  |  |  |
| 1 B                                                                                                                                           | 0.000000                                                                                                                                                                                                                                                                                                                                                                                                                                                                                                                                                                                                                                                                                                                                                                                                                                                                                                                                                                                                                                                                                                                                                                                                                                                                                                                                                                                                                                                                                                                                                                                                                                                                                                                                                                                                                                                                                                                                                                                                                                                                                                                                                                                                                                                                                                                                       |          |          |          |          |   |   |     |          |  |  |  |  |     |          |          |  |  |  |     |          |          |          |  |  |     |          |          |          |          |  |     |          |          |          |          |          |     |          |          |          |          |          |      |          |          |          |          |          |     |          |          |          |          |          |      |          |          |          |          |          |      |          |          |          |          |          |      |          |          |          |          |          |      |          |          |          |          |          |  |   |   |   |   |    |     |          |  |  |  |  |      |          |          |  |  |  |     |          |          |          |  |  |      |          |          |          |          |  |      |          |          |          |          |          |      |          |          |          |          |          |      |          |          |          |          |          |  |    |    |  |  |  |      |          |          |  |  |  |
| 2 B                                                                                                                                           | 2.890742                                                                                                                                                                                                                                                                                                                                                                                                                                                                                                                                                                                                                                                                                                                                                                                                                                                                                                                                                                                                                                                                                                                                                                                                                                                                                                                                                                                                                                                                                                                                                                                                                                                                                                                                                                                                                                                                                                                                                                                                                                                                                                                                                                                                                                                                                                                                       | 0.000000 |          |          |          |   |   |     |          |  |  |  |  |     |          |          |  |  |  |     |          |          |          |  |  |     |          |          |          |          |  |     |          |          |          |          |          |     |          |          |          |          |          |      |          |          |          |          |          |     |          |          |          |          |          |      |          |          |          |          |          |      |          |          |          |          |          |      |          |          |          |          |          |      |          |          |          |          |          |  |   |   |   |   |    |     |          |  |  |  |  |      |          |          |  |  |  |     |          |          |          |  |  |      |          |          |          |          |  |      |          |          |          |          |          |      |          |          |          |          |          |      |          |          |          |          |          |  |    |    |  |  |  |      |          |          |  |  |  |
| 3 B                                                                                                                                           | 1.764097                                                                                                                                                                                                                                                                                                                                                                                                                                                                                                                                                                                                                                                                                                                                                                                                                                                                                                                                                                                                                                                                                                                                                                                                                                                                                                                                                                                                                                                                                                                                                                                                                                                                                                                                                                                                                                                                                                                                                                                                                                                                                                                                                                                                                                                                                                                                       | 1.868420 | 0.000000 |          |          |   |   |     |          |  |  |  |  |     |          |          |  |  |  |     |          |          |          |  |  |     |          |          |          |          |  |     |          |          |          |          |          |     |          |          |          |          |          |      |          |          |          |          |          |     |          |          |          |          |          |      |          |          |          |          |          |      |          |          |          |          |          |      |          |          |          |          |          |      |          |          |          |          |          |  |   |   |   |   |    |     |          |  |  |  |  |      |          |          |  |  |  |     |          |          |          |  |  |      |          |          |          |          |  |      |          |          |          |          |          |      |          |          |          |          |          |      |          |          |          |          |          |  |    |    |  |  |  |      |          |          |  |  |  |
| 4 P                                                                                                                                           | 2.991764                                                                                                                                                                                                                                                                                                                                                                                                                                                                                                                                                                                                                                                                                                                                                                                                                                                                                                                                                                                                                                                                                                                                                                                                                                                                                                                                                                                                                                                                                                                                                                                                                                                                                                                                                                                                                                                                                                                                                                                                                                                                                                                                                                                                                                                                                                                                       | 1.972897 | 1.970879 | 0.000000 |          |   |   |     |          |  |  |  |  |     |          |          |  |  |  |     |          |          |          |  |  |     |          |          |          |          |  |     |          |          |          |          |          |     |          |          |          |          |          |      |          |          |          |          |          |     |          |          |          |          |          |      |          |          |          |          |          |      |          |          |          |          |          |      |          |          |          |          |          |      |          |          |          |          |          |  |   |   |   |   |    |     |          |  |  |  |  |      |          |          |  |  |  |     |          |          |          |  |  |      |          |          |          |          |  |      |          |          |          |          |          |      |          |          |          |          |          |      |          |          |          |          |          |  |    |    |  |  |  |      |          |          |  |  |  |
| 5 C                                                                                                                                           | 3.250583                                                                                                                                                                                                                                                                                                                                                                                                                                                                                                                                                                                                                                                                                                                                                                                                                                                                                                                                                                                                                                                                                                                                                                                                                                                                                                                                                                                                                                                                                                                                                                                                                                                                                                                                                                                                                                                                                                                                                                                                                                                                                                                                                                                                                                                                                                                                       | 1.749152 | 2.901941 | 1.934481 | 0.000000 |   |   |     |          |  |  |  |  |     |          |          |  |  |  |     |          |          |          |  |  |     |          |          |          |          |  |     |          |          |          |          |          |     |          |          |          |          |          |      |          |          |          |          |          |     |          |          |          |          |          |      |          |          |          |          |          |      |          |          |          |          |          |      |          |          |          |          |          |      |          |          |          |          |          |  |   |   |   |   |    |     |          |  |  |  |  |      |          |          |  |  |  |     |          |          |          |  |  |      |          |          |          |          |  |      |          |          |          |          |          |      |          |          |          |          |          |      |          |          |          |          |          |  |    |    |  |  |  |      |          |          |  |  |  |
| 6 B                                                                                                                                           | 2.866964                                                                                                                                                                                                                                                                                                                                                                                                                                                                                                                                                                                                                                                                                                                                                                                                                                                                                                                                                                                                                                                                                                                                                                                                                                                                                                                                                                                                                                                                                                                                                                                                                                                                                                                                                                                                                                                                                                                                                                                                                                                                                                                                                                                                                                                                                                                                       | 1.761699 | 2.926214 | 3.075590 | 1.681024 |   |   |     |          |  |  |  |  |     |          |          |  |  |  |     |          |          |          |  |  |     |          |          |          |          |  |     |          |          |          |          |          |     |          |          |          |          |          |      |          |          |          |          |          |     |          |          |          |          |          |      |          |          |          |          |          |      |          |          |          |          |          |      |          |          |          |          |          |      |          |          |          |          |          |  |   |   |   |   |    |     |          |  |  |  |  |      |          |          |  |  |  |     |          |          |          |  |  |      |          |          |          |          |  |      |          |          |          |          |          |      |          |          |          |          |          |      |          |          |          |          |          |  |    |    |  |  |  |      |          |          |  |  |  |
| 7 B                                                                                                                                           | 2.914872                                                                                                                                                                                                                                                                                                                                                                                                                                                                                                                                                                                                                                                                                                                                                                                                                                                                                                                                                                                                                                                                                                                                                                                                                                                                                                                                                                                                                                                                                                                                                                                                                                                                                                                                                                                                                                                                                                                                                                                                                                                                                                                                                                                                                                                                                                                                       | 3.003591 | 3.087784 | 1.989503 | 1.783541 |   |   |     |          |  |  |  |  |     |          |          |  |  |  |     |          |          |          |  |  |     |          |          |          |          |  |     |          |          |          |          |          |     |          |          |          |          |          |      |          |          |          |          |          |     |          |          |          |          |          |      |          |          |          |          |          |      |          |          |          |          |          |      |          |          |          |          |          |      |          |          |          |          |          |  |   |   |   |   |    |     |          |  |  |  |  |      |          |          |  |  |  |     |          |          |          |  |  |      |          |          |          |          |  |      |          |          |          |          |          |      |          |          |          |          |          |      |          |          |          |          |          |  |    |    |  |  |  |      |          |          |  |  |  |
| 8 B                                                                                                                                           | 1.793802                                                                                                                                                                                                                                                                                                                                                                                                                                                                                                                                                                                                                                                                                                                                                                                                                                                                                                                                                                                                                                                                                                                                                                                                                                                                                                                                                                                                                                                                                                                                                                                                                                                                                                                                                                                                                                                                                                                                                                                                                                                                                                                                                                                                                                                                                                                                       | 1.752677 | 1.758678 | 3.035533 | 2.754041 |   |   |     |          |  |  |  |  |     |          |          |  |  |  |     |          |          |          |  |  |     |          |          |          |          |  |     |          |          |          |          |          |     |          |          |          |          |          |      |          |          |          |          |          |     |          |          |          |          |          |      |          |          |          |          |          |      |          |          |          |          |          |      |          |          |          |          |          |      |          |          |          |          |          |  |   |   |   |   |    |     |          |  |  |  |  |      |          |          |  |  |  |     |          |          |          |  |  |      |          |          |          |          |  |      |          |          |          |          |          |      |          |          |          |          |          |      |          |          |          |          |          |  |    |    |  |  |  |      |          |          |  |  |  |
| 9 Fe                                                                                                                                          | 2.106969                                                                                                                                                                                                                                                                                                                                                                                                                                                                                                                                                                                                                                                                                                                                                                                                                                                                                                                                                                                                                                                                                                                                                                                                                                                                                                                                                                                                                                                                                                                                                                                                                                                                                                                                                                                                                                                                                                                                                                                                                                                                                                                                                                                                                                                                                                                                       | 3.346285 | 2.161468 | 2.054985 | 3.219857 |   |   |     |          |  |  |  |  |     |          |          |  |  |  |     |          |          |          |  |  |     |          |          |          |          |  |     |          |          |          |          |          |     |          |          |          |          |          |      |          |          |          |          |          |     |          |          |          |          |          |      |          |          |          |          |          |      |          |          |          |          |          |      |          |          |          |          |          |      |          |          |          |          |          |  |   |   |   |   |    |     |          |  |  |  |  |      |          |          |  |  |  |     |          |          |          |  |  |      |          |          |          |          |  |      |          |          |          |          |          |      |          |          |          |          |          |      |          |          |          |          |          |  |    |    |  |  |  |      |          |          |  |  |  |
| 10 B                                                                                                                                          | 2.872017                                                                                                                                                                                                                                                                                                                                                                                                                                                                                                                                                                                                                                                                                                                                                                                                                                                                                                                                                                                                                                                                                                                                                                                                                                                                                                                                                                                                                                                                                                                                                                                                                                                                                                                                                                                                                                                                                                                                                                                                                                                                                                                                                                                                                                                                                                                                       | 2.880436 | 3.464761 | 3.058328 | 1.673382 |   |   |     |          |  |  |  |  |     |          |          |  |  |  |     |          |          |          |  |  |     |          |          |          |          |  |     |          |          |          |          |          |     |          |          |          |          |          |      |          |          |          |          |          |     |          |          |          |          |          |      |          |          |          |          |          |      |          |          |          |          |          |      |          |          |          |          |          |      |          |          |          |          |          |  |   |   |   |   |    |     |          |  |  |  |  |      |          |          |  |  |  |     |          |          |          |  |  |      |          |          |          |          |  |      |          |          |          |          |          |      |          |          |          |          |          |      |          |          |          |          |          |  |    |    |  |  |  |      |          |          |  |  |  |
| 11 B                                                                                                                                          | 1.772566                                                                                                                                                                                                                                                                                                                                                                                                                                                                                                                                                                                                                                                                                                                                                                                                                                                                                                                                                                                                                                                                                                                                                                                                                                                                                                                                                                                                                                                                                                                                                                                                                                                                                                                                                                                                                                                                                                                                                                                                                                                                                                                                                                                                                                                                                                                                       | 2.855569 | 2.885721 | 3.549372 | 2.724012 |   |   |     |          |  |  |  |  |     |          |          |  |  |  |     |          |          |          |  |  |     |          |          |          |          |  |     |          |          |          |          |          |     |          |          |          |          |          |      |          |          |          |          |          |     |          |          |          |          |          |      |          |          |          |          |          |      |          |          |          |          |          |      |          |          |          |          |          |      |          |          |          |          |          |  |   |   |   |   |    |     |          |  |  |  |  |      |          |          |  |  |  |     |          |          |          |  |  |      |          |          |          |          |  |      |          |          |          |          |          |      |          |          |          |          |          |      |          |          |          |          |          |  |    |    |  |  |  |      |          |          |  |  |  |
| 12 B                                                                                                                                          | 1.780305                                                                                                                                                                                                                                                                                                                                                                                                                                                                                                                                                                                                                                                                                                                                                                                                                                                                                                                                                                                                                                                                                                                                                                                                                                                                                                                                                                                                                                                                                                                                                                                                                                                                                                                                                                                                                                                                                                                                                                                                                                                                                                                                                                                                                                                                                                                                       | 3.411384 | 2.947770 | 3.014005 | 2.763356 |   |   |     |          |  |  |  |  |     |          |          |  |  |  |     |          |          |          |  |  |     |          |          |          |          |  |     |          |          |          |          |          |     |          |          |          |          |          |      |          |          |          |          |          |     |          |          |          |          |          |      |          |          |          |          |          |      |          |          |          |          |          |      |          |          |          |          |          |      |          |          |          |          |          |  |   |   |   |   |    |     |          |  |  |  |  |      |          |          |  |  |  |     |          |          |          |  |  |      |          |          |          |          |  |      |          |          |          |          |          |      |          |          |          |          |          |      |          |          |          |          |          |  |    |    |  |  |  |      |          |          |  |  |  |
|                                                                                                                                               | 6                                                                                                                                                                                                                                                                                                                                                                                                                                                                                                                                                                                                                                                                                                                                                                                                                                                                                                                                                                                                                                                                                                                                                                                                                                                                                                                                                                                                                                                                                                                                                                                                                                                                                                                                                                                                                                                                                                                                                                                                                                                                                                                                                                                                                                                                                                                                              | 7        | 8        | 9        | 10       |   |   |     |          |  |  |  |  |     |          |          |  |  |  |     |          |          |          |  |  |     |          |          |          |          |  |     |          |          |          |          |          |     |          |          |          |          |          |      |          |          |          |          |          |     |          |          |          |          |          |      |          |          |          |          |          |      |          |          |          |          |          |      |          |          |          |          |          |      |          |          |          |          |          |  |   |   |   |   |    |     |          |  |  |  |  |      |          |          |  |  |  |     |          |          |          |  |  |      |          |          |          |          |  |      |          |          |          |          |          |      |          |          |          |          |          |      |          |          |          |          |          |  |    |    |  |  |  |      |          |          |  |  |  |
| 6 B                                                                                                                                           | 0.000000                                                                                                                                                                                                                                                                                                                                                                                                                                                                                                                                                                                                                                                                                                                                                                                                                                                                                                                                                                                                                                                                                                                                                                                                                                                                                                                                                                                                                                                                                                                                                                                                                                                                                                                                                                                                                                                                                                                                                                                                                                                                                                                                                                                                                                                                                                                                       |          |          |          |          |   |   |     |          |  |  |  |  |     |          |          |  |  |  |     |          |          |          |  |  |     |          |          |          |          |  |     |          |          |          |          |          |     |          |          |          |          |          |      |          |          |          |          |          |     |          |          |          |          |          |      |          |          |          |          |          |      |          |          |          |          |          |      |          |          |          |          |          |      |          |          |          |          |          |  |   |   |   |   |    |     |          |  |  |  |  |      |          |          |  |  |  |     |          |          |          |  |  |      |          |          |          |          |  |      |          |          |          |          |          |      |          |          |          |          |          |      |          |          |          |          |          |  |    |    |  |  |  |      |          |          |  |  |  |
| 7 B                                                                                                                                           | 2.911623                                                                                                                                                                                                                                                                                                                                                                                                                                                                                                                                                                                                                                                                                                                                                                                                                                                                                                                                                                                                                                                                                                                                                                                                                                                                                                                                                                                                                                                                                                                                                                                                                                                                                                                                                                                                                                                                                                                                                                                                                                                                                                                                                                                                                                                                                                                                       | 0.000000 |          |          |          |   |   |     |          |  |  |  |  |     |          |          |  |  |  |     |          |          |          |  |  |     |          |          |          |          |  |     |          |          |          |          |          |     |          |          |          |          |          |      |          |          |          |          |          |     |          |          |          |          |          |      |          |          |          |          |          |      |          |          |          |          |          |      |          |          |          |          |          |      |          |          |          |          |          |  |   |   |   |   |    |     |          |  |  |  |  |      |          |          |  |  |  |     |          |          |          |  |  |      |          |          |          |          |  |      |          |          |          |          |          |      |          |          |          |          |          |      |          |          |          |          |          |  |    |    |  |  |  |      |          |          |  |  |  |
| 8 B                                                                                                                                           | 1.762744                                                                                                                                                                                                                                                                                                                                                                                                                                                                                                                                                                                                                                                                                                                                                                                                                                                                                                                                                                                                                                                                                                                                                                                                                                                                                                                                                                                                                                                                                                                                                                                                                                                                                                                                                                                                                                                                                                                                                                                                                                                                                                                                                                                                                                                                                                                                       | 3.447634 | 0.000000 |          |          |   |   |     |          |  |  |  |  |     |          |          |  |  |  |     |          |          |          |  |  |     |          |          |          |          |  |     |          |          |          |          |          |     |          |          |          |          |          |      |          |          |          |          |          |     |          |          |          |          |          |      |          |          |          |          |          |      |          |          |          |          |          |      |          |          |          |          |          |      |          |          |          |          |          |  |   |   |   |   |    |     |          |  |  |  |  |      |          |          |  |  |  |     |          |          |          |  |  |      |          |          |          |          |  |      |          |          |          |          |          |      |          |          |          |          |          |      |          |          |          |          |          |  |    |    |  |  |  |      |          |          |  |  |  |
| 9 Fe                                                                                                                                          | 3.876370                                                                                                                                                                                                                                                                                                                                                                                                                                                                                                                                                                                                                                                                                                                                                                                                                                                                                                                                                                                                                                                                                                                                                                                                                                                                                                                                                                                                                                                                                                                                                                                                                                                                                                                                                                                                                                                                                                                                                                                                                                                                                                                                                                                                                                                                                                                                       | 2.120596 | 3.333263 | 0.000000 |          |   |   |     |          |  |  |  |  |     |          |          |  |  |  |     |          |          |          |  |  |     |          |          |          |          |  |     |          |          |          |          |          |     |          |          |          |          |          |      |          |          |          |          |          |     |          |          |          |          |          |      |          |          |          |          |          |      |          |          |          |          |          |      |          |          |          |          |          |      |          |          |          |          |          |  |   |   |   |   |    |     |          |  |  |  |  |      |          |          |  |  |  |     |          |          |          |  |  |      |          |          |          |          |  |      |          |          |          |          |          |      |          |          |          |          |          |      |          |          |          |          |          |  |    |    |  |  |  |      |          |          |  |  |  |
| 10 B                                                                                                                                          | 1.762893                                                                                                                                                                                                                                                                                                                                                                                                                                                                                                                                                                                                                                                                                                                                                                                                                                                                                                                                                                                                                                                                                                                                                                                                                                                                                                                                                                                                                                                                                                                                                                                                                                                                                                                                                                                                                                                                                                                                                                                                                                                                                                                                                                                                                                                                                                                                       | 1.755395 | 2.868805 | 3.313068 | 0.000000 |   |   |     |          |  |  |  |  |     |          |          |  |  |  |     |          |          |          |  |  |     |          |          |          |          |  |     |          |          |          |          |          |     |          |          |          |          |          |      |          |          |          |          |          |     |          |          |          |          |          |      |          |          |          |          |          |      |          |          |          |          |          |      |          |          |          |          |          |      |          |          |          |          |          |  |   |   |   |   |    |     |          |  |  |  |  |      |          |          |  |  |  |     |          |          |          |  |  |      |          |          |          |          |  |      |          |          |          |          |          |      |          |          |          |          |          |      |          |          |          |          |          |  |    |    |  |  |  |      |          |          |  |  |  |
| 11 B                                                                                                                                          | 1.751995                                                                                                                                                                                                                                                                                                                                                                                                                                                                                                                                                                                                                                                                                                                                                                                                                                                                                                                                                                                                                                                                                                                                                                                                                                                                                                                                                                                                                                                                                                                                                                                                                                                                                                                                                                                                                                                                                                                                                                                                                                                                                                                                                                                                                                                                                                                                       | 2.873648 | 1.770362 | 3.318437 | 1.764606 |   |   |     |          |  |  |  |  |     |          |          |  |  |  |     |          |          |          |  |  |     |          |          |          |          |  |     |          |          |          |          |          |     |          |          |          |          |          |      |          |          |          |          |          |     |          |          |          |          |          |      |          |          |          |          |          |      |          |          |          |          |          |      |          |          |          |          |          |      |          |          |          |          |          |  |   |   |   |   |    |     |          |  |  |  |  |      |          |          |  |  |  |     |          |          |          |  |  |      |          |          |          |          |  |      |          |          |          |          |          |      |          |          |          |          |          |      |          |          |          |          |          |  |    |    |  |  |  |      |          |          |  |  |  |
| 12 B                                                                                                                                          | 2.873020                                                                                                                                                                                                                                                                                                                                                                                                                                                                                                                                                                                                                                                                                                                                                                                                                                                                                                                                                                                                                                                                                                                                                                                                                                                                                                                                                                                                                                                                                                                                                                                                                                                                                                                                                                                                                                                                                                                                                                                                                                                                                                                                                                                                                                                                                                                                       | 1.754832 | 2.892133 | 2.100136 | 1.783396 |   |   |     |          |  |  |  |  |     |          |          |  |  |  |     |          |          |          |  |  |     |          |          |          |          |  |     |          |          |          |          |          |     |          |          |          |          |          |      |          |          |          |          |          |     |          |          |          |          |          |      |          |          |          |          |          |      |          |          |          |          |          |      |          |          |          |          |          |      |          |          |          |          |          |  |   |   |   |   |    |     |          |  |  |  |  |      |          |          |  |  |  |     |          |          |          |  |  |      |          |          |          |          |  |      |          |          |          |          |          |      |          |          |          |          |          |      |          |          |          |          |          |  |    |    |  |  |  |      |          |          |  |  |  |
|                                                                                                                                               | 11                                                                                                                                                                                                                                                                                                                                                                                                                                                                                                                                                                                                                                                                                                                                                                                                                                                                                                                                                                                                                                                                                                                                                                                                                                                                                                                                                                                                                                                                                                                                                                                                                                                                                                                                                                                                                                                                                                                                                                                                                                                                                                                                                                                                                                                                                                                                             | 12       |          |          |          |   |   |     |          |  |  |  |  |     |          |          |  |  |  |     |          |          |          |  |  |     |          |          |          |          |  |     |          |          |          |          |          |     |          |          |          |          |          |      |          |          |          |          |          |     |          |          |          |          |          |      |          |          |          |          |          |      |          |          |          |          |          |      |          |          |          |          |          |      |          |          |          |          |          |  |   |   |   |   |    |     |          |  |  |  |  |      |          |          |  |  |  |     |          |          |          |  |  |      |          |          |          |          |  |      |          |          |          |          |          |      |          |          |          |          |          |      |          |          |          |          |          |  |    |    |  |  |  |      |          |          |  |  |  |
| 12 B                                                                                                                                          | 1.780203                                                                                                                                                                                                                                                                                                                                                                                                                                                                                                                                                                                                                                                                                                                                                                                                                                                                                                                                                                                                                                                                                                                                                                                                                                                                                                                                                                                                                                                                                                                                                                                                                                                                                                                                                                                                                                                                                                                                                                                                                                                                                                                                                                                                                                                                                                                                       | 0.000000 |          |          |          |   |   |     |          |  |  |  |  |     |          |          |  |  |  |     |          |          |          |  |  |     |          |          |          |          |  |     |          |          |          |          |          |     |          |          |          |          |          |      |          |          |          |          |          |     |          |          |          |          |          |      |          |          |          |          |          |      |          |          |          |          |          |      |          |          |          |          |          |      |          |          |          |          |          |  |   |   |   |   |    |     |          |  |  |  |  |      |          |          |  |  |  |     |          |          |          |  |  |      |          |          |          |          |  |      |          |          |          |          |          |      |          |          |          |          |          |      |          |          |          |          |          |  |    |    |  |  |  |      |          |          |  |  |  |
|  <p>8. -2106.09320800 +26.1<br/>C<sub>1</sub> H/L 3.07</p> | <table border="1"> <thead> <tr> <th></th> <th>1</th> <th>2</th> <th>3</th> <th>4</th> <th>5</th> </tr> </thead> <tbody> <tr><td>1 B</td><td>0.000000</td><td></td><td></td><td></td><td></td></tr> <tr><td>2 B</td><td>3.472865</td><td>0.000000</td><td></td><td></td><td></td></tr> <tr><td>3 B</td><td>1.772105</td><td>2.888354</td><td>0.000000</td><td></td><td></td></tr> <tr><td>4 B</td><td>1.908597</td><td>2.901564</td><td>1.770917</td><td>0.000000</td><td></td></tr> <tr><td>5 B</td><td>3.081962</td><td>1.741334</td><td>2.927631</td><td>1.873424</td><td>0.000000</td></tr> <tr><td>6 B</td><td>2.948397</td><td>1.763000</td><td>1.797452</td><td>1.758585</td><td>1.744928</td></tr> <tr><td>7 Fe</td><td>2.015522</td><td>3.262999</td><td>2.071719</td><td>3.310166</td><td>3.883500</td></tr> <tr><td>8 C</td><td>2.837524</td><td>1.704657</td><td>2.787623</td><td>3.302949</td><td>2.787288</td></tr> <tr><td>9 B</td><td>1.906917</td><td>2.929437</td><td>2.926101</td><td>3.063515</td><td>3.075460</td></tr> <tr><td>10 B</td><td>3.063858</td><td>1.739652</td><td>3.435669</td><td>3.010434</td><td>1.854599</td></tr> <tr><td>11 P</td><td>1.976166</td><td>3.005767</td><td>3.011623</td><td>1.950891</td><td>1.974163</td></tr> <tr><td>12 B</td><td>2.882574</td><td>1.778898</td><td>1.775209</td><td>2.873913</td><td>2.873220</td></tr> <tr> <td></td> <td>6</td> <td>7</td> <td>8</td> <td>9</td> <td>10</td> </tr> <tr><td>6 B</td><td>0.000000</td><td></td><td></td><td></td><td></td></tr> <tr><td>7 Fe</td><td>3.278888</td><td>0.000000</td><td></td><td></td><td></td></tr> <tr><td>8 C</td><td>2.759966</td><td>2.007620</td><td>0.000000</td><td></td><td></td></tr> <tr><td>9 B</td><td>3.454950</td><td>1.959942</td><td>1.689312</td><td>0.000000</td><td></td></tr> <tr><td>10 B</td><td>2.883500</td><td>3.276339</td><td>1.674694</td><td>1.910276</td><td>0.000000</td></tr> <tr><td>11 P</td><td>3.006816</td><td>3.369645</td><td>2.884459</td><td>1.988982</td><td>1.950001</td></tr> <tr><td>12 B</td><td>1.783881</td><td>2.029716</td><td>1.699703</td><td>2.849883</td><td>2.852263</td></tr> <tr> <td></td> <td>11</td> <td>12</td> <td></td> <td></td> <td></td> </tr> <tr><td>12 B</td><td>3.506905</td><td>0.000000</td><td></td><td></td><td></td></tr> </tbody> </table> |          | 1        | 2        | 3        | 4 | 5 | 1 B | 0.000000 |  |  |  |  | 2 B | 3.472865 | 0.000000 |  |  |  | 3 B | 1.772105 | 2.888354 | 0.000000 |  |  | 4 B | 1.908597 | 2.901564 | 1.770917 | 0.000000 |  | 5 B | 3.081962 | 1.741334 | 2.927631 | 1.873424 | 0.000000 | 6 B | 2.948397 | 1.763000 | 1.797452 | 1.758585 | 1.744928 | 7 Fe | 2.015522 | 3.262999 | 2.071719 | 3.310166 | 3.883500 | 8 C | 2.837524 | 1.704657 | 2.787623 | 3.302949 | 2.787288 | 9 B  | 1.906917 | 2.929437 | 2.926101 | 3.063515 | 3.075460 | 10 B | 3.063858 | 1.739652 | 3.435669 | 3.010434 | 1.854599 | 11 P | 1.976166 | 3.005767 | 3.011623 | 1.950891 | 1.974163 | 12 B | 2.882574 | 1.778898 | 1.775209 | 2.873913 | 2.873220 |  | 6 | 7 | 8 | 9 | 10 | 6 B | 0.000000 |  |  |  |  | 7 Fe | 3.278888 | 0.000000 |  |  |  | 8 C | 2.759966 | 2.007620 | 0.000000 |  |  | 9 B  | 3.454950 | 1.959942 | 1.689312 | 0.000000 |  | 10 B | 2.883500 | 3.276339 | 1.674694 | 1.910276 | 0.000000 | 11 P | 3.006816 | 3.369645 | 2.884459 | 1.988982 | 1.950001 | 12 B | 1.783881 | 2.029716 | 1.699703 | 2.849883 | 2.852263 |  | 11 | 12 |  |  |  | 12 B | 3.506905 | 0.000000 |  |  |  |
|                                                                                                                                               | 1                                                                                                                                                                                                                                                                                                                                                                                                                                                                                                                                                                                                                                                                                                                                                                                                                                                                                                                                                                                                                                                                                                                                                                                                                                                                                                                                                                                                                                                                                                                                                                                                                                                                                                                                                                                                                                                                                                                                                                                                                                                                                                                                                                                                                                                                                                                                              | 2        | 3        | 4        | 5        |   |   |     |          |  |  |  |  |     |          |          |  |  |  |     |          |          |          |  |  |     |          |          |          |          |  |     |          |          |          |          |          |     |          |          |          |          |          |      |          |          |          |          |          |     |          |          |          |          |          |      |          |          |          |          |          |      |          |          |          |          |          |      |          |          |          |          |          |      |          |          |          |          |          |  |   |   |   |   |    |     |          |  |  |  |  |      |          |          |  |  |  |     |          |          |          |  |  |      |          |          |          |          |  |      |          |          |          |          |          |      |          |          |          |          |          |      |          |          |          |          |          |  |    |    |  |  |  |      |          |          |  |  |  |
| 1 B                                                                                                                                           | 0.000000                                                                                                                                                                                                                                                                                                                                                                                                                                                                                                                                                                                                                                                                                                                                                                                                                                                                                                                                                                                                                                                                                                                                                                                                                                                                                                                                                                                                                                                                                                                                                                                                                                                                                                                                                                                                                                                                                                                                                                                                                                                                                                                                                                                                                                                                                                                                       |          |          |          |          |   |   |     |          |  |  |  |  |     |          |          |  |  |  |     |          |          |          |  |  |     |          |          |          |          |  |     |          |          |          |          |          |     |          |          |          |          |          |      |          |          |          |          |          |     |          |          |          |          |          |      |          |          |          |          |          |      |          |          |          |          |          |      |          |          |          |          |          |      |          |          |          |          |          |  |   |   |   |   |    |     |          |  |  |  |  |      |          |          |  |  |  |     |          |          |          |  |  |      |          |          |          |          |  |      |          |          |          |          |          |      |          |          |          |          |          |      |          |          |          |          |          |  |    |    |  |  |  |      |          |          |  |  |  |
| 2 B                                                                                                                                           | 3.472865                                                                                                                                                                                                                                                                                                                                                                                                                                                                                                                                                                                                                                                                                                                                                                                                                                                                                                                                                                                                                                                                                                                                                                                                                                                                                                                                                                                                                                                                                                                                                                                                                                                                                                                                                                                                                                                                                                                                                                                                                                                                                                                                                                                                                                                                                                                                       | 0.000000 |          |          |          |   |   |     |          |  |  |  |  |     |          |          |  |  |  |     |          |          |          |  |  |     |          |          |          |          |  |     |          |          |          |          |          |     |          |          |          |          |          |      |          |          |          |          |          |     |          |          |          |          |          |      |          |          |          |          |          |      |          |          |          |          |          |      |          |          |          |          |          |      |          |          |          |          |          |  |   |   |   |   |    |     |          |  |  |  |  |      |          |          |  |  |  |     |          |          |          |  |  |      |          |          |          |          |  |      |          |          |          |          |          |      |          |          |          |          |          |      |          |          |          |          |          |  |    |    |  |  |  |      |          |          |  |  |  |
| 3 B                                                                                                                                           | 1.772105                                                                                                                                                                                                                                                                                                                                                                                                                                                                                                                                                                                                                                                                                                                                                                                                                                                                                                                                                                                                                                                                                                                                                                                                                                                                                                                                                                                                                                                                                                                                                                                                                                                                                                                                                                                                                                                                                                                                                                                                                                                                                                                                                                                                                                                                                                                                       | 2.888354 | 0.000000 |          |          |   |   |     |          |  |  |  |  |     |          |          |  |  |  |     |          |          |          |  |  |     |          |          |          |          |  |     |          |          |          |          |          |     |          |          |          |          |          |      |          |          |          |          |          |     |          |          |          |          |          |      |          |          |          |          |          |      |          |          |          |          |          |      |          |          |          |          |          |      |          |          |          |          |          |  |   |   |   |   |    |     |          |  |  |  |  |      |          |          |  |  |  |     |          |          |          |  |  |      |          |          |          |          |  |      |          |          |          |          |          |      |          |          |          |          |          |      |          |          |          |          |          |  |    |    |  |  |  |      |          |          |  |  |  |
| 4 B                                                                                                                                           | 1.908597                                                                                                                                                                                                                                                                                                                                                                                                                                                                                                                                                                                                                                                                                                                                                                                                                                                                                                                                                                                                                                                                                                                                                                                                                                                                                                                                                                                                                                                                                                                                                                                                                                                                                                                                                                                                                                                                                                                                                                                                                                                                                                                                                                                                                                                                                                                                       | 2.901564 | 1.770917 | 0.000000 |          |   |   |     |          |  |  |  |  |     |          |          |  |  |  |     |          |          |          |  |  |     |          |          |          |          |  |     |          |          |          |          |          |     |          |          |          |          |          |      |          |          |          |          |          |     |          |          |          |          |          |      |          |          |          |          |          |      |          |          |          |          |          |      |          |          |          |          |          |      |          |          |          |          |          |  |   |   |   |   |    |     |          |  |  |  |  |      |          |          |  |  |  |     |          |          |          |  |  |      |          |          |          |          |  |      |          |          |          |          |          |      |          |          |          |          |          |      |          |          |          |          |          |  |    |    |  |  |  |      |          |          |  |  |  |
| 5 B                                                                                                                                           | 3.081962                                                                                                                                                                                                                                                                                                                                                                                                                                                                                                                                                                                                                                                                                                                                                                                                                                                                                                                                                                                                                                                                                                                                                                                                                                                                                                                                                                                                                                                                                                                                                                                                                                                                                                                                                                                                                                                                                                                                                                                                                                                                                                                                                                                                                                                                                                                                       | 1.741334 | 2.927631 | 1.873424 | 0.000000 |   |   |     |          |  |  |  |  |     |          |          |  |  |  |     |          |          |          |  |  |     |          |          |          |          |  |     |          |          |          |          |          |     |          |          |          |          |          |      |          |          |          |          |          |     |          |          |          |          |          |      |          |          |          |          |          |      |          |          |          |          |          |      |          |          |          |          |          |      |          |          |          |          |          |  |   |   |   |   |    |     |          |  |  |  |  |      |          |          |  |  |  |     |          |          |          |  |  |      |          |          |          |          |  |      |          |          |          |          |          |      |          |          |          |          |          |      |          |          |          |          |          |  |    |    |  |  |  |      |          |          |  |  |  |
| 6 B                                                                                                                                           | 2.948397                                                                                                                                                                                                                                                                                                                                                                                                                                                                                                                                                                                                                                                                                                                                                                                                                                                                                                                                                                                                                                                                                                                                                                                                                                                                                                                                                                                                                                                                                                                                                                                                                                                                                                                                                                                                                                                                                                                                                                                                                                                                                                                                                                                                                                                                                                                                       | 1.763000 | 1.797452 | 1.758585 | 1.744928 |   |   |     |          |  |  |  |  |     |          |          |  |  |  |     |          |          |          |  |  |     |          |          |          |          |  |     |          |          |          |          |          |     |          |          |          |          |          |      |          |          |          |          |          |     |          |          |          |          |          |      |          |          |          |          |          |      |          |          |          |          |          |      |          |          |          |          |          |      |          |          |          |          |          |  |   |   |   |   |    |     |          |  |  |  |  |      |          |          |  |  |  |     |          |          |          |  |  |      |          |          |          |          |  |      |          |          |          |          |          |      |          |          |          |          |          |      |          |          |          |          |          |  |    |    |  |  |  |      |          |          |  |  |  |
| 7 Fe                                                                                                                                          | 2.015522                                                                                                                                                                                                                                                                                                                                                                                                                                                                                                                                                                                                                                                                                                                                                                                                                                                                                                                                                                                                                                                                                                                                                                                                                                                                                                                                                                                                                                                                                                                                                                                                                                                                                                                                                                                                                                                                                                                                                                                                                                                                                                                                                                                                                                                                                                                                       | 3.262999 | 2.071719 | 3.310166 | 3.883500 |   |   |     |          |  |  |  |  |     |          |          |  |  |  |     |          |          |          |  |  |     |          |          |          |          |  |     |          |          |          |          |          |     |          |          |          |          |          |      |          |          |          |          |          |     |          |          |          |          |          |      |          |          |          |          |          |      |          |          |          |          |          |      |          |          |          |          |          |      |          |          |          |          |          |  |   |   |   |   |    |     |          |  |  |  |  |      |          |          |  |  |  |     |          |          |          |  |  |      |          |          |          |          |  |      |          |          |          |          |          |      |          |          |          |          |          |      |          |          |          |          |          |  |    |    |  |  |  |      |          |          |  |  |  |
| 8 C                                                                                                                                           | 2.837524                                                                                                                                                                                                                                                                                                                                                                                                                                                                                                                                                                                                                                                                                                                                                                                                                                                                                                                                                                                                                                                                                                                                                                                                                                                                                                                                                                                                                                                                                                                                                                                                                                                                                                                                                                                                                                                                                                                                                                                                                                                                                                                                                                                                                                                                                                                                       | 1.704657 | 2.787623 | 3.302949 | 2.787288 |   |   |     |          |  |  |  |  |     |          |          |  |  |  |     |          |          |          |  |  |     |          |          |          |          |  |     |          |          |          |          |          |     |          |          |          |          |          |      |          |          |          |          |          |     |          |          |          |          |          |      |          |          |          |          |          |      |          |          |          |          |          |      |          |          |          |          |          |      |          |          |          |          |          |  |   |   |   |   |    |     |          |  |  |  |  |      |          |          |  |  |  |     |          |          |          |  |  |      |          |          |          |          |  |      |          |          |          |          |          |      |          |          |          |          |          |      |          |          |          |          |          |  |    |    |  |  |  |      |          |          |  |  |  |
| 9 B                                                                                                                                           | 1.906917                                                                                                                                                                                                                                                                                                                                                                                                                                                                                                                                                                                                                                                                                                                                                                                                                                                                                                                                                                                                                                                                                                                                                                                                                                                                                                                                                                                                                                                                                                                                                                                                                                                                                                                                                                                                                                                                                                                                                                                                                                                                                                                                                                                                                                                                                                                                       | 2.929437 | 2.926101 | 3.063515 | 3.075460 |   |   |     |          |  |  |  |  |     |          |          |  |  |  |     |          |          |          |  |  |     |          |          |          |          |  |     |          |          |          |          |          |     |          |          |          |          |          |      |          |          |          |          |          |     |          |          |          |          |          |      |          |          |          |          |          |      |          |          |          |          |          |      |          |          |          |          |          |      |          |          |          |          |          |  |   |   |   |   |    |     |          |  |  |  |  |      |          |          |  |  |  |     |          |          |          |  |  |      |          |          |          |          |  |      |          |          |          |          |          |      |          |          |          |          |          |      |          |          |          |          |          |  |    |    |  |  |  |      |          |          |  |  |  |
| 10 B                                                                                                                                          | 3.063858                                                                                                                                                                                                                                                                                                                                                                                                                                                                                                                                                                                                                                                                                                                                                                                                                                                                                                                                                                                                                                                                                                                                                                                                                                                                                                                                                                                                                                                                                                                                                                                                                                                                                                                                                                                                                                                                                                                                                                                                                                                                                                                                                                                                                                                                                                                                       | 1.739652 | 3.435669 | 3.010434 | 1.854599 |   |   |     |          |  |  |  |  |     |          |          |  |  |  |     |          |          |          |  |  |     |          |          |          |          |  |     |          |          |          |          |          |     |          |          |          |          |          |      |          |          |          |          |          |     |          |          |          |          |          |      |          |          |          |          |          |      |          |          |          |          |          |      |          |          |          |          |          |      |          |          |          |          |          |  |   |   |   |   |    |     |          |  |  |  |  |      |          |          |  |  |  |     |          |          |          |  |  |      |          |          |          |          |  |      |          |          |          |          |          |      |          |          |          |          |          |      |          |          |          |          |          |  |    |    |  |  |  |      |          |          |  |  |  |
| 11 P                                                                                                                                          | 1.976166                                                                                                                                                                                                                                                                                                                                                                                                                                                                                                                                                                                                                                                                                                                                                                                                                                                                                                                                                                                                                                                                                                                                                                                                                                                                                                                                                                                                                                                                                                                                                                                                                                                                                                                                                                                                                                                                                                                                                                                                                                                                                                                                                                                                                                                                                                                                       | 3.005767 | 3.011623 | 1.950891 | 1.974163 |   |   |     |          |  |  |  |  |     |          |          |  |  |  |     |          |          |          |  |  |     |          |          |          |          |  |     |          |          |          |          |          |     |          |          |          |          |          |      |          |          |          |          |          |     |          |          |          |          |          |      |          |          |          |          |          |      |          |          |          |          |          |      |          |          |          |          |          |      |          |          |          |          |          |  |   |   |   |   |    |     |          |  |  |  |  |      |          |          |  |  |  |     |          |          |          |  |  |      |          |          |          |          |  |      |          |          |          |          |          |      |          |          |          |          |          |      |          |          |          |          |          |  |    |    |  |  |  |      |          |          |  |  |  |
| 12 B                                                                                                                                          | 2.882574                                                                                                                                                                                                                                                                                                                                                                                                                                                                                                                                                                                                                                                                                                                                                                                                                                                                                                                                                                                                                                                                                                                                                                                                                                                                                                                                                                                                                                                                                                                                                                                                                                                                                                                                                                                                                                                                                                                                                                                                                                                                                                                                                                                                                                                                                                                                       | 1.778898 | 1.775209 | 2.873913 | 2.873220 |   |   |     |          |  |  |  |  |     |          |          |  |  |  |     |          |          |          |  |  |     |          |          |          |          |  |     |          |          |          |          |          |     |          |          |          |          |          |      |          |          |          |          |          |     |          |          |          |          |          |      |          |          |          |          |          |      |          |          |          |          |          |      |          |          |          |          |          |      |          |          |          |          |          |  |   |   |   |   |    |     |          |  |  |  |  |      |          |          |  |  |  |     |          |          |          |  |  |      |          |          |          |          |  |      |          |          |          |          |          |      |          |          |          |          |          |      |          |          |          |          |          |  |    |    |  |  |  |      |          |          |  |  |  |
|                                                                                                                                               | 6                                                                                                                                                                                                                                                                                                                                                                                                                                                                                                                                                                                                                                                                                                                                                                                                                                                                                                                                                                                                                                                                                                                                                                                                                                                                                                                                                                                                                                                                                                                                                                                                                                                                                                                                                                                                                                                                                                                                                                                                                                                                                                                                                                                                                                                                                                                                              | 7        | 8        | 9        | 10       |   |   |     |          |  |  |  |  |     |          |          |  |  |  |     |          |          |          |  |  |     |          |          |          |          |  |     |          |          |          |          |          |     |          |          |          |          |          |      |          |          |          |          |          |     |          |          |          |          |          |      |          |          |          |          |          |      |          |          |          |          |          |      |          |          |          |          |          |      |          |          |          |          |          |  |   |   |   |   |    |     |          |  |  |  |  |      |          |          |  |  |  |     |          |          |          |  |  |      |          |          |          |          |  |      |          |          |          |          |          |      |          |          |          |          |          |      |          |          |          |          |          |  |    |    |  |  |  |      |          |          |  |  |  |
| 6 B                                                                                                                                           | 0.000000                                                                                                                                                                                                                                                                                                                                                                                                                                                                                                                                                                                                                                                                                                                                                                                                                                                                                                                                                                                                                                                                                                                                                                                                                                                                                                                                                                                                                                                                                                                                                                                                                                                                                                                                                                                                                                                                                                                                                                                                                                                                                                                                                                                                                                                                                                                                       |          |          |          |          |   |   |     |          |  |  |  |  |     |          |          |  |  |  |     |          |          |          |  |  |     |          |          |          |          |  |     |          |          |          |          |          |     |          |          |          |          |          |      |          |          |          |          |          |     |          |          |          |          |          |      |          |          |          |          |          |      |          |          |          |          |          |      |          |          |          |          |          |      |          |          |          |          |          |  |   |   |   |   |    |     |          |  |  |  |  |      |          |          |  |  |  |     |          |          |          |  |  |      |          |          |          |          |  |      |          |          |          |          |          |      |          |          |          |          |          |      |          |          |          |          |          |  |    |    |  |  |  |      |          |          |  |  |  |
| 7 Fe                                                                                                                                          | 3.278888                                                                                                                                                                                                                                                                                                                                                                                                                                                                                                                                                                                                                                                                                                                                                                                                                                                                                                                                                                                                                                                                                                                                                                                                                                                                                                                                                                                                                                                                                                                                                                                                                                                                                                                                                                                                                                                                                                                                                                                                                                                                                                                                                                                                                                                                                                                                       | 0.000000 |          |          |          |   |   |     |          |  |  |  |  |     |          |          |  |  |  |     |          |          |          |  |  |     |          |          |          |          |  |     |          |          |          |          |          |     |          |          |          |          |          |      |          |          |          |          |          |     |          |          |          |          |          |      |          |          |          |          |          |      |          |          |          |          |          |      |          |          |          |          |          |      |          |          |          |          |          |  |   |   |   |   |    |     |          |  |  |  |  |      |          |          |  |  |  |     |          |          |          |  |  |      |          |          |          |          |  |      |          |          |          |          |          |      |          |          |          |          |          |      |          |          |          |          |          |  |    |    |  |  |  |      |          |          |  |  |  |
| 8 C                                                                                                                                           | 2.759966                                                                                                                                                                                                                                                                                                                                                                                                                                                                                                                                                                                                                                                                                                                                                                                                                                                                                                                                                                                                                                                                                                                                                                                                                                                                                                                                                                                                                                                                                                                                                                                                                                                                                                                                                                                                                                                                                                                                                                                                                                                                                                                                                                                                                                                                                                                                       | 2.007620 | 0.000000 |          |          |   |   |     |          |  |  |  |  |     |          |          |  |  |  |     |          |          |          |  |  |     |          |          |          |          |  |     |          |          |          |          |          |     |          |          |          |          |          |      |          |          |          |          |          |     |          |          |          |          |          |      |          |          |          |          |          |      |          |          |          |          |          |      |          |          |          |          |          |      |          |          |          |          |          |  |   |   |   |   |    |     |          |  |  |  |  |      |          |          |  |  |  |     |          |          |          |  |  |      |          |          |          |          |  |      |          |          |          |          |          |      |          |          |          |          |          |      |          |          |          |          |          |  |    |    |  |  |  |      |          |          |  |  |  |
| 9 B                                                                                                                                           | 3.454950                                                                                                                                                                                                                                                                                                                                                                                                                                                                                                                                                                                                                                                                                                                                                                                                                                                                                                                                                                                                                                                                                                                                                                                                                                                                                                                                                                                                                                                                                                                                                                                                                                                                                                                                                                                                                                                                                                                                                                                                                                                                                                                                                                                                                                                                                                                                       | 1.959942 | 1.689312 | 0.000000 |          |   |   |     |          |  |  |  |  |     |          |          |  |  |  |     |          |          |          |  |  |     |          |          |          |          |  |     |          |          |          |          |          |     |          |          |          |          |          |      |          |          |          |          |          |     |          |          |          |          |          |      |          |          |          |          |          |      |          |          |          |          |          |      |          |          |          |          |          |      |          |          |          |          |          |  |   |   |   |   |    |     |          |  |  |  |  |      |          |          |  |  |  |     |          |          |          |  |  |      |          |          |          |          |  |      |          |          |          |          |          |      |          |          |          |          |          |      |          |          |          |          |          |  |    |    |  |  |  |      |          |          |  |  |  |
| 10 B                                                                                                                                          | 2.883500                                                                                                                                                                                                                                                                                                                                                                                                                                                                                                                                                                                                                                                                                                                                                                                                                                                                                                                                                                                                                                                                                                                                                                                                                                                                                                                                                                                                                                                                                                                                                                                                                                                                                                                                                                                                                                                                                                                                                                                                                                                                                                                                                                                                                                                                                                                                       | 3.276339 | 1.674694 | 1.910276 | 0.000000 |   |   |     |          |  |  |  |  |     |          |          |  |  |  |     |          |          |          |  |  |     |          |          |          |          |  |     |          |          |          |          |          |     |          |          |          |          |          |      |          |          |          |          |          |     |          |          |          |          |          |      |          |          |          |          |          |      |          |          |          |          |          |      |          |          |          |          |          |      |          |          |          |          |          |  |   |   |   |   |    |     |          |  |  |  |  |      |          |          |  |  |  |     |          |          |          |  |  |      |          |          |          |          |  |      |          |          |          |          |          |      |          |          |          |          |          |      |          |          |          |          |          |  |    |    |  |  |  |      |          |          |  |  |  |
| 11 P                                                                                                                                          | 3.006816                                                                                                                                                                                                                                                                                                                                                                                                                                                                                                                                                                                                                                                                                                                                                                                                                                                                                                                                                                                                                                                                                                                                                                                                                                                                                                                                                                                                                                                                                                                                                                                                                                                                                                                                                                                                                                                                                                                                                                                                                                                                                                                                                                                                                                                                                                                                       | 3.369645 | 2.884459 | 1.988982 | 1.950001 |   |   |     |          |  |  |  |  |     |          |          |  |  |  |     |          |          |          |  |  |     |          |          |          |          |  |     |          |          |          |          |          |     |          |          |          |          |          |      |          |          |          |          |          |     |          |          |          |          |          |      |          |          |          |          |          |      |          |          |          |          |          |      |          |          |          |          |          |      |          |          |          |          |          |  |   |   |   |   |    |     |          |  |  |  |  |      |          |          |  |  |  |     |          |          |          |  |  |      |          |          |          |          |  |      |          |          |          |          |          |      |          |          |          |          |          |      |          |          |          |          |          |  |    |    |  |  |  |      |          |          |  |  |  |
| 12 B                                                                                                                                          | 1.783881                                                                                                                                                                                                                                                                                                                                                                                                                                                                                                                                                                                                                                                                                                                                                                                                                                                                                                                                                                                                                                                                                                                                                                                                                                                                                                                                                                                                                                                                                                                                                                                                                                                                                                                                                                                                                                                                                                                                                                                                                                                                                                                                                                                                                                                                                                                                       | 2.029716 | 1.699703 | 2.849883 | 2.852263 |   |   |     |          |  |  |  |  |     |          |          |  |  |  |     |          |          |          |  |  |     |          |          |          |          |  |     |          |          |          |          |          |     |          |          |          |          |          |      |          |          |          |          |          |     |          |          |          |          |          |      |          |          |          |          |          |      |          |          |          |          |          |      |          |          |          |          |          |      |          |          |          |          |          |  |   |   |   |   |    |     |          |  |  |  |  |      |          |          |  |  |  |     |          |          |          |  |  |      |          |          |          |          |  |      |          |          |          |          |          |      |          |          |          |          |          |      |          |          |          |          |          |  |    |    |  |  |  |      |          |          |  |  |  |
|                                                                                                                                               | 11                                                                                                                                                                                                                                                                                                                                                                                                                                                                                                                                                                                                                                                                                                                                                                                                                                                                                                                                                                                                                                                                                                                                                                                                                                                                                                                                                                                                                                                                                                                                                                                                                                                                                                                                                                                                                                                                                                                                                                                                                                                                                                                                                                                                                                                                                                                                             | 12       |          |          |          |   |   |     |          |  |  |  |  |     |          |          |  |  |  |     |          |          |          |  |  |     |          |          |          |          |  |     |          |          |          |          |          |     |          |          |          |          |          |      |          |          |          |          |          |     |          |          |          |          |          |      |          |          |          |          |          |      |          |          |          |          |          |      |          |          |          |          |          |      |          |          |          |          |          |  |   |   |   |   |    |     |          |  |  |  |  |      |          |          |  |  |  |     |          |          |          |  |  |      |          |          |          |          |  |      |          |          |          |          |          |      |          |          |          |          |          |      |          |          |          |          |          |  |    |    |  |  |  |      |          |          |  |  |  |
| 12 B                                                                                                                                          | 3.506905                                                                                                                                                                                                                                                                                                                                                                                                                                                                                                                                                                                                                                                                                                                                                                                                                                                                                                                                                                                                                                                                                                                                                                                                                                                                                                                                                                                                                                                                                                                                                                                                                                                                                                                                                                                                                                                                                                                                                                                                                                                                                                                                                                                                                                                                                                                                       | 0.000000 |          |          |          |   |   |     |          |  |  |  |  |     |          |          |  |  |  |     |          |          |          |  |  |     |          |          |          |          |  |     |          |          |          |          |          |     |          |          |          |          |          |      |          |          |          |          |          |     |          |          |          |          |          |      |          |          |          |          |          |      |          |          |          |          |          |      |          |          |          |          |          |      |          |          |          |          |          |  |   |   |   |   |    |     |          |  |  |  |  |      |          |          |  |  |  |     |          |          |          |  |  |      |          |          |          |          |  |      |          |          |          |          |          |      |          |          |          |          |          |      |          |          |          |          |          |  |    |    |  |  |  |      |          |          |  |  |  |

Table S5C. Energy ranking for all of the CpFeCHPHB<sub>9</sub>H<sub>9</sub> optimized structures:

| No | Initial structure            | Final energy (a.u.) | ΔE (kcal/mol) |
|----|------------------------------|---------------------|---------------|
| 1  | 03a-AnticubeOh-Fe3C5P2       | -2066.8120894       | 0.00          |
| 2  | 03a-AnticubeOh-Fe1C3P3_r-261 | -2066.8120862       | 0.00          |
| 3  | 02a-CubeOh-Fe2C4P4           | -2066.8120832       | 0.00          |
| 4  | 03a-AnticubeOh-Fe2C2P7       | -2066.8120816       | 0.00          |
| 5  | 03b-AnticubeOh-Fe3P2C8       | -2066.8120802       | 0.01          |
| 6  | 01a-Icos-Fe1C1P5             | -2066.8120796       | 0.01          |
| 7  | 02a-CubeOh-Fe2C3P6           | -2066.8120796       | 0.01          |
| 8  | 03a-AnticubeOh-Fe1C1P2       | -2066.8120794       | 0.01          |
| 9  | 03b-AnticubeOh-Fe2P3C3_r-55  | -2066.8120787       | 0.01          |
| 10 | 02a-CubeOh-Fe2C1P10          | -2066.8120786       | 0.01          |
| 11 | 03b-AnticubeOh-Fe3P3C6       | -2066.8120786       | 0.01          |
| 12 | 02a-CubeOh-Fe1C1P5           | -2066.8120777       | 0.01          |
| 13 | 03b-AnticubeOh-Fe2P4C2_r-56  | -2066.8120742       | 0.01          |
| 14 | 02b-CubeOh-Fe2P2C8           | -2066.8120601       | 0.02          |
| 15 | 03a-AnticubeOh-Fe3C1P9       | -2066.8098554       | 1.40          |
| 16 | 03a-AnticubeOh-Fe3C3P7       | -2066.8098540       | 1.40          |
| 17 | 03b-AnticubeOh-Fe3P3C5_r-50  | -2066.8098511       | 1.40          |
| 18 | 03b-AnticubeOh-Fe1P1C1_r-248 | -2066.8098509       | 1.40          |
| 19 | 03a-AnticubeOh-Fe3C3P5       | -2066.8098502       | 1.41          |
| 20 | 03b-AnticubeOh-Fe2P3C2       | -2066.8098502       | 1.41          |
| 21 | 02a-CubeOh-Fe1C1P4           | -2066.8098500       | 1.41          |
| 22 | 03b-AnticubeOh-Fe3P2C6       | -2066.8098498       | 1.41          |
| 23 | 03a-AnticubeOh-Fe1C2P1       | -2066.8098492       | 1.41          |
| 24 | 03a-AnticubeOh-Fe2C1P2       | -2066.8098491       | 1.41          |
| 25 | 03b-AnticubeOh-Fe2P2C2       | -2066.8098490       | 1.41          |
| 26 | 02b-CubeOh-Fe1P1C4           | -2066.8098488       | 1.41          |
| 27 | 02a-CubeOh-Fe1C2P1           | -2066.8098488       | 1.41          |
| 28 | 03b-AnticubeOh-Fe2P1C2       | -2066.8098483       | 1.41          |
| 29 | 03a-AnticubeOh-Fe2C3P2_r-248 | -2066.8098482       | 1.41          |
| 30 | 03b-AnticubeOh-Fe2P3C1       | -2066.8098481       | 1.41          |
| 31 | 03b-AnticubeOh-Fe2P1C5       | -2066.8098479       | 1.41          |
| 32 | 03b-AnticubeOh-Fe3P1C8       | -2066.8098478       | 1.41          |
| 33 | 02a-CubeOh-Fe1C1P1           | -2066.8098475       | 1.41          |
| 34 | 02b-CubeOh-Fe1P2C1           | -2066.8098469       | 1.41          |
| 35 | 01a-Icos-Fe1C1P2             | -2066.8098463       | 1.41          |
| 36 | 02b-CubeOh-Fe1P1C1           | -2066.8098461       | 1.41          |
| 37 | 03b-AnticubeOh-Fe1P2C1       | -2066.8098459       | 1.41          |
| 38 | 03b-AnticubeOh-Fe3P1C9       | -2066.8098454       | 1.41          |
| 39 | 03a-AnticubeOh-Fe3C1P8       | -2066.8098442       | 1.41          |

|    |                             |               |       |
|----|-----------------------------|---------------|-------|
| 40 | 03a-AnticubeOh-Fe3C2P6      | -2066.8098439 | 1.41  |
| 41 | 01b-Icos-Fe1P1C2            | -2066.8098115 | 1.43  |
| 42 | 02a-CubeOh-Fe2C1P9          | -2066.8098111 | 1.43  |
| 43 | 03b-AnticubeOh-Fe3P3C5_i-50 | -2066.8080278 | 2.55  |
| 44 | 02a-CubeOh-Fe2C2P1          | -2066.8017239 | 6.50  |
| 45 | 02b-CubeOh-Fe2P4C6          | -2066.8017239 | 6.50  |
| 46 | 03a-AnticubeOh-Fe1C2P9      | -2066.8017192 | 6.51  |
| 47 | 02a-CubeOh-Fe2C4P1          | -2066.8017183 | 6.51  |
| 48 | 02a-CubeOh-Fe2C3P8          | -2066.8017167 | 6.51  |
| 49 | 03a-AnticubeOh-Fe3C1P6      | -2066.8017165 | 6.51  |
| 50 | 01b-Icos-Fe1P1C4            | -2066.8017165 | 6.51  |
| 51 | 03b-AnticubeOh-Fe3P2C4      | -2066.8017162 | 6.51  |
| 52 | 02b-CubeOh-Fe2P1C8          | -2066.8017153 | 6.51  |
| 53 | 03a-AnticubeOh-Fe2C2P2      | -2066.8017133 | 6.51  |
| 54 | 03b-AnticubeOh-Fe3P3C2      | -2066.8017132 | 6.51  |
| 55 | 03b-AnticubeOh-Fe2P2C6      | -2066.8017125 | 6.51  |
| 56 | 02a-CubeOh-Fe2C2P6          | -2066.8017124 | 6.51  |
| 57 | 02a-CubeOh-Fe1C1P3          | -2066.8017122 | 6.51  |
| 58 | 03b-AnticubeOh-Fe3P3C4      | -2066.8017112 | 6.51  |
| 59 | 02a-CubeOh-Fe2C3P2          | -2066.8017110 | 6.51  |
| 60 | 02a-CubeOh-Fe1C2P5          | -2066.7960833 | 10.04 |
| 61 | 03b-AnticubeOh-Fe2P1C4      | -2066.7960600 | 10.06 |
| 62 | 03a-AnticubeOh-Fe3C4P6      | -2066.7960574 | 10.06 |
| 63 | 03b-AnticubeOh-Fe3P3C1      | -2066.7960568 | 10.06 |
| 64 | 01b-Icos-Fe1P1C6            | -2066.7960563 | 10.06 |
| 65 | 02a-CubeOh-Fe2C6P1          | -2066.7960561 | 10.06 |
| 66 | 03a-AnticubeOh-Fe3C1P3      | -2066.7960558 | 10.06 |
| 67 | 03b-AnticubeOh-Fe2P3C4      | -2066.7960551 | 10.06 |
| 68 | 03b-AnticubeOh-Fe3P3C8      | -2066.7960530 | 10.06 |
| 69 | 03a-AnticubeOh-Fe2C3P3      | -2066.7829356 | 18.29 |
| 70 | 03b-AnticubeOh-Fe2P2C7      | -2066.7829139 | 18.31 |
| 71 | 03a-AnticubeOh-Fe2C1P5      | -2066.7829115 | 18.31 |
| 72 | 03a-AnticubeOh-Fe3C2P8      | -2066.7829108 | 18.31 |
| 73 | 03a-AnticubeOh-Fe3C3P6      | -2066.7829108 | 18.31 |
| 74 | 03b-AnticubeOh-Fe3P1C10     | -2066.7829107 | 18.31 |
| 75 | 03b-AnticubeOh-Fe3P4C4      | -2066.7829107 | 18.31 |
| 76 | 01b-Icos-Fe1P1C5            | -2066.7829086 | 18.31 |
| 77 | 02b-CubeOh-Fe1P2C4          | -2066.7829078 | 18.31 |
| 78 | 02b-CubeOh-Fe2P5C1          | -2066.7829075 | 18.31 |
| 79 | 02a-CubeOh-Fe1C2P4          | -2066.7829074 | 18.31 |
| 80 | 03a-AnticubeOh-Fe2C4P2      | -2066.7829054 | 18.31 |
| 81 | 02b-CubeOh-Fe2P4C4          | -2066.7829041 | 18.31 |



|     |                        |               |       |
|-----|------------------------|---------------|-------|
| 82  | 01b-Icos-Fe1P1C1       | -2066.7780930 | 21.33 |
| 83  | 03a-AnticubeOh-Fe3C1P5 | -2066.7780731 | 21.35 |
| 84  | 03b-AnticubeOh-Fe3P1C5 | -2066.7780712 | 21.35 |
| 85  | 02a-CubeOh-Fe2C1P7     | -2066.7780702 | 21.35 |
| 86  | 02b-CubeOh-Fe1P1C2     | -2066.7780693 | 21.35 |
| 87  | 02b-CubeOh-Fe2P1C2     | -2066.7780692 | 21.35 |
| 88  | 02b-CubeOh-Fe2P1C7     | -2066.7780691 | 21.35 |
| 89  | 03b-AnticubeOh-Fe1P1C5 | -2066.7780683 | 21.35 |
| 90  | 03a-AnticubeOh-Fe1C1P5 | -2066.7780682 | 21.35 |
| 91  | 03b-AnticubeOh-Fe2P1C6 | -2066.7780681 | 21.35 |
| 92  | 03b-AnticubeOh-Fe3P1C7 | -2066.7780678 | 21.35 |
| 93  | 03b-AnticubeOh-Fe3P3C3 | -2066.7780670 | 21.35 |
| 94  | 03a-AnticubeOh-Fe3C3P3 | -2066.7780661 | 21.35 |
| 95  | 02a-CubeOh-Fe1C1P2     | -2066.7780660 | 21.35 |
| 96  | 03b-AnticubeOh-Fe3P2C1 | -2066.7780659 | 21.35 |
| 97  | 03a-AnticubeOh-Fe3C1P7 | -2066.7780628 | 21.35 |
| 98  | 02a-CubeOh-Fe2C1P2     | -2066.7780610 | 21.35 |
| 99  | 01a-Icos-Fe1C1P1       | -2066.7780437 | 21.36 |
| 100 | 02a-CubeOh-Fe2C1P8     | -2066.7731118 | 24.46 |
| 101 | 01a-Icos-Fe1C1P4       | -2066.7731071 | 24.46 |
| 102 | 03a-AnticubeOh-Fe2C1P3 | -2066.7731071 | 24.46 |
| 103 | 02b-CubeOh-Fe1P2C2     | -2066.7731059 | 24.46 |
| 104 | 02b-CubeOh-Fe2P1C5     | -2066.7731052 | 24.46 |
| 105 | 03a-AnticubeOh-Fe3C3P2 | -2066.7731048 | 24.46 |
| 106 | 03a-AnticubeOh-Fe3C3P4 | -2066.7731042 | 24.46 |
| 107 | 02b-CubeOh-Fe2P3C2     | -2066.7731039 | 24.46 |
| 108 | 02b-CubeOh-Fe1P1C3     | -2066.7731031 | 24.46 |
| 109 | 02b-CubeOh-Fe2P2C6     | -2066.7731015 | 24.47 |
| 110 | 02b-CubeOh-Fe2P2C1     | -2066.7730982 | 24.47 |
| 111 | 01b-Icos-Fe1P1C3       | -2066.7723507 | 24.94 |
| 112 | 03b-AnticubeOh-Fe2P1C3 | -2066.7723504 | 24.94 |
| 113 | 03a-AnticubeOh-Fe3C1P2 | -2066.7723502 | 24.94 |
| 114 | 03a-AnticubeOh-Fe2C1P6 | -2066.7723496 | 24.94 |
| 115 | 03a-AnticubeOh-Fe3C6P1 | -2066.7723494 | 24.94 |
| 116 | 02a-CubeOh-Fe2C3P1     | -2066.7723493 | 24.94 |
| 117 | 03b-AnticubeOh-Fe1P2C4 | -2066.7723486 | 24.94 |
| 118 | 03b-AnticubeOh-Fe1P2C5 | -2066.7723486 | 24.94 |
| 119 | 02a-CubeOh-Fe2C3P3     | -2066.7723484 | 24.94 |
| 120 | 02b-CubeOh-Fe2P1C1     | -2066.7723464 | 24.94 |
| 121 | 02a-CubeOh-Fe1C3P2     | -2066.7723451 | 24.94 |
| 122 | 03a-AnticubeOh-Fe3C4P2 | -2066.7723397 | 24.94 |
| 123 | 02a-CubeOh-Fe1C1P7     | -2066.7723329 | 24.95 |

|     |                              |               |       |
|-----|------------------------------|---------------|-------|
| 124 | 01a-Icos-Fe1C2P2             | -2066.7657284 | 29.09 |
| 125 | 02a-CubeOh-Fe2C2P4           | -2066.7657238 | 29.10 |
| 126 | 01b-Icos-Fe1P2C2             | -2066.7657237 | 29.10 |
| 127 | 03a-AnticubeOh-Fe2C2P9       | -2066.7657235 | 29.10 |
| 128 | 02b-CubeOh-Fe2P2C4           | -2066.7657230 | 29.10 |
| 129 | 02b-CubeOh-Fe2P4C5           | -2066.7657229 | 29.10 |
| 130 | 03b-AnticubeOh-Fe3P5C1       | -2066.7657227 | 29.10 |
| 131 | 03b-AnticubeOh-Fe2P2C8       | -2066.7657220 | 29.10 |
| 132 | 02a-CubeOh-Fe2C4P5           | -2066.7657218 | 29.10 |
| 133 | 03a-AnticubeOh-Fe3C4P1       | -2066.7657218 | 29.10 |
| 134 | 03b-AnticubeOh-Fe1P3C4_r-366 | -2066.7657216 | 29.10 |
| 135 | 02b-CubeOh-Fe2P2C7           | -2066.7657215 | 29.10 |
| 136 | 02a-CubeOh-Fe2C2P7           | -2066.7657211 | 29.10 |
| 137 | 03a-AnticubeOh-Fe3C5P1       | -2066.7657209 | 29.10 |
| 138 | 03a-AnticubeOh-Fe2C2P8       | -2066.7657205 | 29.10 |
| 139 | 03b-AnticubeOh-Fe3P4C1       | -2066.7657205 | 29.10 |
| 140 | 02a-CubeOh-Fe2C2P9           | -2066.7657185 | 29.10 |
| 141 | 03b-AnticubeOh-Fe2P2C9       | -2066.7657163 | 29.10 |
| 142 | 03b-AnticubeOh-Fe3P4C6       | -2066.7561176 | 35.12 |
| 143 | 03a-AnticubeOh-Fe2C2P4       | -2066.7561175 | 35.12 |
| 144 | 02b-CubeOh-Fe2P1C6_r-101     | -2066.7561174 | 35.12 |
| 145 | 03a-AnticubeOh-Fe3C3P8       | -2066.7561166 | 35.12 |
| 146 | 02b-CubeOh-Fe1P2C5           | -2066.7561166 | 35.12 |
| 147 | 01a-Icos-Fe1C1P6             | -2066.7561158 | 35.12 |
| 148 | 03b-AnticubeOh-Fe3P1C3       | -2066.7561135 | 35.13 |
| 149 | 03a-AnticubeOh-Fe3C3P1       | -2066.7561086 | 35.13 |
| 150 | 03a-AnticubeOh-Fe1C2P8       | -2066.7561084 | 35.13 |
| 151 | 03b-AnticubeOh-Fe2P2C4       | -2066.7438233 | 42.84 |
| 152 | 03a-AnticubeOh-Fe1C3P4_r-401 | -2066.7379492 | 46.52 |
| 153 | 02b-CubeOh-Fe1P2C3_r-20      | -2066.7361297 | 47.67 |
| 154 | 03b-AnticubeOh-Fe3P1C4       | -2066.7361279 | 47.67 |
| 155 | 01a-Icos-Fe1C1P3             | -2066.7361270 | 47.67 |
| 156 | 02b-CubeOh-Fe1P1C7           | -2066.7361238 | 47.67 |
| 157 | 02b-CubeOh-Fe2P3C3           | -2066.7361152 | 47.68 |
| 158 | 02a-CubeOh-Fe2C1P1           | -2066.7357497 | 47.90 |
| 159 | 03a-AnticubeOh-Fe1C2P4       | -2066.7357422 | 47.91 |
| 160 | 02b-CubeOh-Fe2P3C5           | -2066.7354069 | 48.12 |
| 161 | 03a-AnticubeOh-Fe1C2P2       | -2066.7353860 | 48.13 |
| 162 | 03b-AnticubeOh-Fe1P2C2       | -2066.7353841 | 48.13 |
| 163 | 02a-CubeOh-Fe2C3P5           | -2066.7353840 | 48.13 |
| 164 | 03a-AnticubeOh-Fe1C1P1       | -2066.7353809 | 48.14 |
| 165 | 02b-CubeOh-Fe2P1C9           | -2066.7353794 | 48.14 |

|     |                              |               |       |
|-----|------------------------------|---------------|-------|
| 166 | 03a-AnticubeOh-Fe1C2P6       | -2066.7332535 | 49.47 |
| 167 | 03b-AnticubeOh-Fe1P2C6       | -2066.7332509 | 49.47 |
| 168 | 03a-AnticubeOh-Fe1C1P6       | -2066.7332502 | 49.47 |
| 169 | 03b-AnticubeOh-Fe1P1C6       | -2066.7332499 | 49.47 |
| 170 | 02b-CubeOh-Fe2P3C7           | -2066.7332488 | 49.47 |
| 171 | 02a-CubeOh-Fe2C3P7           | -2066.7332450 | 49.48 |
| 172 | 03a-AnticubeOh-Fe3C2P4       | -2066.7332364 | 49.48 |
| 173 | 02a-CubeOh-Fe2C2P2           | -2066.7331723 | 49.52 |
| 174 | 02b-CubeOh-Fe2P4C2           | -2066.7331723 | 49.52 |
| 175 | 02b-CubeOh-Fe2P2C3           | -2066.7331714 | 49.52 |
| 176 | 01a-Icos-Fe1C2P1             | -2066.7331713 | 49.52 |
| 177 | 02b-CubeOh-Fe2P2C2           | -2066.7331713 | 49.52 |
| 178 | 02a-CubeOh-Fe2C4P2           | -2066.7331703 | 49.52 |
| 179 | 01b-Icos-Fe1P2C1             | -2066.7331703 | 49.52 |
| 180 | 02a-CubeOh-Fe2C2P3           | -2066.7331657 | 49.53 |
| 181 | 03b-AnticubeOh-Fe3P3C7       | -2066.7297114 | 51.69 |
| 182 | 03a-AnticubeOh-Fe3C4P7       | -2066.7297006 | 51.70 |
| 183 | 03b-AnticubeOh-Fe3P4C7       | -2066.7297006 | 51.70 |
| 184 | 01a-Icos-Fe1C2P3             | -2066.7297005 | 51.70 |
| 185 | 02a-CubeOh-Fe2C4P3           | -2066.7296994 | 51.70 |
| 186 | 02b-CubeOh-Fe2P5C2           | -2066.7296930 | 51.71 |
| 187 | 02a-CubeOh-Fe2C4P6           | -2066.7281474 | 52.68 |
| 188 | 03a-AnticubeOh-Fe1C2P7       | -2066.7281451 | 52.68 |
| 189 | 03b-AnticubeOh-Fe1P3C1       | -2066.7281435 | 52.68 |
| 190 | 02b-CubeOh-Fe2P3C8           | -2066.7281344 | 52.68 |
| 191 | 02b-CubeOh-Fe1P1C5           | -2066.7274503 | 53.11 |
| 192 | 03a-AnticubeOh-Fe3C1P10      | -2066.7258216 | 54.13 |
| 193 | 02a-CubeOh-Fe1C1P6           | -2066.7258199 | 54.14 |
| 194 | 03b-AnticubeOh-Fe1P1C4       | -2066.7258195 | 54.14 |
| 195 | 03a-AnticubeOh-Fe3C4P4       | -2066.7258193 | 54.14 |
| 196 | 02a-CubeOh-Fe2C1P6           | -2066.7258155 | 54.14 |
| 197 | 02a-CubeOh-Fe2C3P4           | -2066.7258098 | 54.14 |
| 198 | 03a-AnticubeOh-Fe2C3P1       | -2066.7215408 | 56.82 |
| 199 | 03a-AnticubeOh-Fe3C2P1       | -2066.7200843 | 57.74 |
| 200 | 03a-AnticubeOh-Fe3C1P4       | -2066.7199032 | 57.85 |
| 201 | 03a-AnticubeOh-Fe2C3P2_i-248 | -2066.7196043 | 58.04 |
| 202 | 03b-AnticubeOh-Fe1P1C1_i-248 | -2066.7195974 | 58.04 |
| 203 | 03a-AnticubeOh-Fe2C2P5       | -2066.7189495 | 58.45 |
| 204 | 02b-CubeOh-Fe2P2C9           | -2066.7172684 | 59.50 |
| 205 | 03b-AnticubeOh-Fe1P1C7       | -2066.7170070 | 59.67 |
| 206 | 03b-AnticubeOh-Fe1P2C9       | -2066.7170067 | 59.67 |
| 207 | 02b-CubeOh-Fe2P1C4           | -2066.7170053 | 59.67 |

|     |                              |               |       |
|-----|------------------------------|---------------|-------|
| 208 | 03a-AnticubeOh-Fe3C4P3       | -2066.7158759 | 60.38 |
| 209 | 02b-CubeOh-Fe2P4C3           | -2066.7158708 | 60.38 |
| 210 | 01b-Icos-Fe1P2C3             | -2066.7158700 | 60.38 |
| 211 | 03b-AnticubeOh-Fe1P2C8       | -2066.7156384 | 60.52 |
| 212 | 03a-AnticubeOh-Fe3C2P9       | -2066.7156324 | 60.53 |
| 213 | 03a-AnticubeOh-Fe3C4P5       | -2066.7156324 | 60.53 |
| 214 | 02b-CubeOh-Fe2P3C4           | -2066.7150149 | 60.92 |
| 215 | 03a-AnticubeOh-Fe2C3P4_r-349 | -2066.7150148 | 60.92 |
| 216 | 03a-AnticubeOh-Fe2C1P4       | -2066.7150138 | 60.92 |
| 217 | 03a-AnticubeOh-Fe1C1P4       | -2066.7150132 | 60.92 |
| 218 | 02b-CubeOh-Fe1P1C6           | -2066.7150127 | 60.92 |
| 219 | 02b-CubeOh-Fe2P4C1           | -2066.7146898 | 61.12 |
| 220 | 02a-CubeOh-Fe2C4P7           | -2066.7136686 | 61.76 |
| 221 | 02a-CubeOh-Fe1C2P2           | -2066.7131511 | 62.09 |
| 222 | 03b-AnticubeOh-Fe1P2C3       | -2066.7131426 | 62.09 |
| 223 | 02a-CubeOh-Fe2C2P8           | -2066.7122255 | 62.67 |
| 224 | 02b-CubeOh-Fe2P3C6           | -2066.7122243 | 62.67 |
| 225 | 03b-AnticubeOh-Fe1P2C7       | -2066.7115488 | 63.09 |
| 226 | 03a-AnticubeOh-Fe1C1P7       | -2066.7115431 | 63.09 |
| 227 | 03a-AnticubeOh-Fe1C3P1       | -2066.7115393 | 63.10 |
| 228 | 03b-AnticubeOh-Fe3P4C2       | -2066.7109411 | 63.47 |
| 229 | 02a-CubeOh-Fe2C1P4           | -2066.7091381 | 64.60 |
| 230 | 02a-CubeOh-Fe2C1P3           | -2066.7081335 | 65.23 |
| 231 | 02b-CubeOh-Fe1P3C2           | -2066.7073345 | 65.74 |
| 232 | 02b-CubeOh-Fe2P3C1           | -2066.7073330 | 65.74 |
| 233 | 03b-AnticubeOh-Fe3P1C2       | -2066.7073330 | 65.74 |
| 234 | 02b-CubeOh-Fe2P1C3           | -2066.7073180 | 65.75 |
| 235 | 03a-AnticubeOh-Fe1C3P2       | -2066.7059974 | 66.57 |
| 236 | 02b-CubeOh-Fe2P1C6_i-101     | -2066.7049953 | 67.20 |
| 237 | 02b-CubeOh-Fe2P1C10          | -2066.7048678 | 67.28 |
| 238 | 03b-AnticubeOh-Fe1P3C3       | -2066.7048648 | 67.29 |
| 239 | 03b-AnticubeOh-Fe1P1C2       | -2066.7048566 | 67.29 |
| 240 | 02b-CubeOh-Fe1P3C3           | -2066.7041019 | 67.76 |
| 241 | 03b-AnticubeOh-Fe3P1C1       | -2066.7021344 | 69.00 |
| 242 | 03a-AnticubeOh-Fe1C2P5       | -2066.7015495 | 69.37 |
| 243 | 02b-CubeOh-Fe2P6C1           | -2066.6991215 | 70.89 |
| 244 | 03a-AnticubeOh-Fe3C2P7       | -2066.6982527 | 71.43 |
| 245 | 03b-AnticubeOh-Fe3P2C7       | -2066.6982500 | 71.44 |
| 246 | 03a-AnticubeOh-Fe3C1P1       | -2066.6977446 | 71.75 |
| 247 | 02b-CubeOh-Fe1P3C4           | -2066.6969330 | 72.26 |
| 248 | 03b-AnticubeOh-Fe3P5C2       | -2066.6955957 | 73.10 |
| 249 | 03a-AnticubeOh-Fe2C3P5       | -2066.6950245 | 73.46 |

|     |                              |               |       |
|-----|------------------------------|---------------|-------|
| 250 | 03a-AnticubeOh-Fe3C2P5       | -2066.6948478 | 73.57 |
| 251 | 03b-AnticubeOh-Fe3P2C5       | -2066.6948474 | 73.57 |
| 252 | 02b-CubeOh-Fe1P3C1           | -2066.6947056 | 73.66 |
| 253 | 02a-CubeOh-Fe1C3P4           | -2066.6944098 | 73.85 |
| 254 | 03b-AnticubeOh-Fe3P2C9       | -2066.6942526 | 73.94 |
| 255 | 03b-AnticubeOh-Fe3P4C5       | -2066.6942514 | 73.95 |
| 256 | 02a-CubeOh-Fe2C5P2           | -2066.6942493 | 73.95 |
| 257 | 02a-CubeOh-Fe1C3P3           | -2066.6930730 | 74.69 |
| 258 | 03a-AnticubeOh-Fe2C4P4       | -2066.6905567 | 76.26 |
| 259 | 03a-AnticubeOh-Fe2C2P1       | -2066.6904854 | 76.31 |
| 260 | 03b-AnticubeOh-Fe2P2C1       | -2066.6904853 | 76.31 |
| 261 | 03a-AnticubeOh-Fe1C2P3       | -2066.6890503 | 77.21 |
| 262 | 02a-CubeOh-Fe2C1P5           | -2066.6887739 | 77.38 |
| 263 | 02a-CubeOh-Fe1C3P1           | -2066.6885438 | 77.53 |
| 264 | 02b-CubeOh-Fe1P2C3_i-20      | -2066.6862922 | 78.94 |
| 265 | 03b-AnticubeOh-Fe1P3C5       | -2066.6822020 | 81.51 |
| 266 | 02b-CubeOh-Fe2P2C5           | -2066.6821975 | 81.51 |
| 267 | 03a-AnticubeOh-Fe1C1P3       | -2066.6811491 | 82.17 |
| 268 | 03a-AnticubeOh-Fe2C1P1       | -2066.6802342 | 82.74 |
| 269 | 03b-AnticubeOh-Fe2P1C1       | -2066.6802332 | 82.74 |
| 270 | 03b-AnticubeOh-Fe1P4C2       | -2066.6797123 | 83.07 |
| 271 | 03b-AnticubeOh-Fe1P3C2       | -2066.6792564 | 83.36 |
| 272 | 03b-AnticubeOh-Fe1P4C1       | -2066.6780033 | 84.14 |
| 273 | 03a-AnticubeOh-Fe1C4P1       | -2066.6780025 | 84.14 |
| 274 | 03b-AnticubeOh-Fe2P3C3_i-55  | -2066.6737009 | 86.84 |
| 275 | 03b-AnticubeOh-Fe2P4C4_i-83  | -2066.6736938 | 86.85 |
| 276 | 03b-AnticubeOh-Fe1P1C3_r-38  | -2066.6700138 | 89.16 |
| 277 | 03b-AnticubeOh-Fe1P1C3_i-38  | -2066.6691589 | 89.69 |
| 278 | 03b-AnticubeOh-Fe3P1C6       | -2066.6686431 | 90.02 |
| 279 | 03a-AnticubeOh-Fe1C3P5       | -2066.6679305 | 90.46 |
| 280 | 03a-AnticubeOh-Fe2C3P4_i-349 | -2066.6678721 | 90.50 |
| 281 | 03b-AnticubeOh-Fe2P4C3       | -2066.6665034 | 91.36 |
| 282 | 03a-AnticubeOh-Fe2C4P3       | -2066.6665000 | 91.36 |
| 283 | 03a-AnticubeOh-Fe3C2P2       | -2066.6662901 | 91.49 |
| 284 | 03a-AnticubeOh-Fe3C2P3       | -2066.6660579 | 91.64 |
| 285 | 03b-AnticubeOh-Fe3P4C3       | -2066.6660563 | 91.64 |
| 286 | 03a-AnticubeOh-Fe2C2P6       | -2066.6655434 | 91.96 |
| 287 | 02a-CubeOh-Fe2C2P5           | -2066.6624875 | 93.88 |
| 288 | 03a-AnticubeOh-Fe1C4P2       | -2066.6624868 | 93.88 |
| 289 | 02a-CubeOh-Fe1C2P3           | -2066.6587999 | 96.19 |
| 290 | 03b-AnticubeOh-Fe3P2C3       | -2066.6569255 | 97.37 |
| 291 | 03b-AnticubeOh-Fe2P2C3       | -2066.6556361 | 98.18 |

|     |                              |               |        |
|-----|------------------------------|---------------|--------|
| 292 | 03b-AnticubeOh-Fe2P4C2_i-56  | -2066.6556336 | 98.18  |
| 293 | 02b-CubeOh-Fe2P4C7           | -2066.6556320 | 98.18  |
| 294 | 02a-CubeOh-Fe2C5P1           | -2066.6550659 | 98.54  |
| 295 | 03b-AnticubeOh-Fe2P3C5       | -2066.6525376 | 100.12 |
| 296 | 03a-AnticubeOh-Fe1C3P3_i-261 | -2066.6493882 | 102.10 |
| 297 | 03b-AnticubeOh-Fe3P2C2       | -2066.6469913 | 103.60 |
| 298 | 03b-AnticubeOh-Fe3P6C1       | -2066.6403239 | 107.79 |
| 299 | 03a-AnticubeOh-Fe2C2P3       | -2066.6397708 | 108.13 |
| 300 | 03a-AnticubeOh-Fe2C4P1       | -2066.6397646 | 108.14 |
| 301 | 03b-AnticubeOh-Fe2P2C5       | -2066.6206265 | 120.15 |
| 302 | 03a-AnticubeOh-Fe1C3P4_i-401 | -2066.6142929 | 124.12 |
| 303 | 03b-AnticubeOh-Fe1P3C4_i-366 | -2066.6134193 | 124.67 |
| 304 | 03b-AnticubeOh-Fe2P4C4_r-83  | -2066.5933599 | 137.26 |
